# Supplementary material for: Individualized Corrective Training Based on Precision Biomechanical Assessment for the Prevention of Sports Injuries in Adolescents
Source: Research Square preprint supplement (doi:10.21203/rs.3.rs-8426574/v1), 2026-02-02

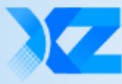

左右脚动态数据

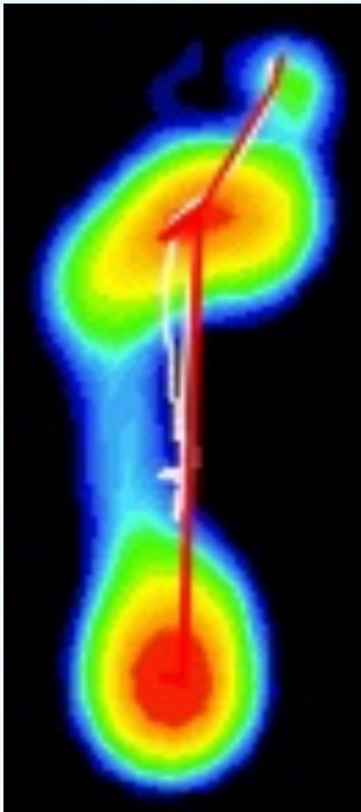

| 第1步      | Cop数据     | 第2步      |
|----------|-----------|----------|
| 237.21   | cop距离【mm】 | 189.31   |
| 8.55     | 步偏脚【°】    | 6.34     |
| 9095.94  | 面积【mm²】   | 8771.57  |
| 23256.74 | 压力【kgf】   | 20595.10 |
| 2.31     | 压强【gr/%】  | 2.12     |
| 36779.86 | 最大压力【kgf】 | 35626.64 |
| 0.18     | 速度【mm/ms】 | 0.16     |

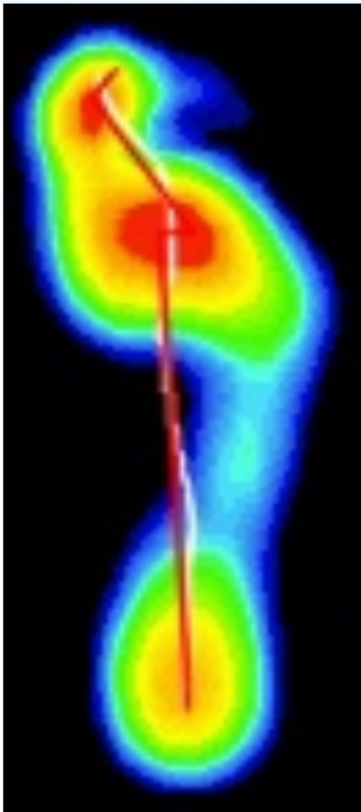

支撑相

左脚

|             |          |
|-------------|----------|
| ● 着地期 9%    |          |
| 时长【ms】      | 124.00   |
| 平均速度【mm/ms】 | 0.19     |
| 最大面积【mm²】   | 3599.10  |
| 最大压力【kgf】   | 8620.84  |
| ● 平足期 76%   |          |
| 时长【ms】      | 1036.00  |
| 平均速度【mm/ms】 | 0.13     |
| 最大面积【mm²】   | 12539.70 |
| 最大压力【kgf】   | 35970.29 |
| ● 蹬伸期 14%   |          |
| 时长【ms】      | 192.00   |
| 平均速度【mm/ms】 | 0.25     |
| 最大面积【mm²】   | 5514.30  |
| 最大压力【kgf】   | 14067.24 |

右脚

|             |          |
|-------------|----------|
| ● 着地期 8%    |          |
| 时长【ms】      | 100.00   |
| 平均速度【mm/ms】 | 0.08     |
| 最大面积【mm²】   | 3203.44  |
| 最大压力【kgf】   | 7461.05  |
| ● 平足期 82%   |          |
| 时长【ms】      | 1045.00  |
| 平均速度【mm/ms】 | 0.14     |
| 最大面积【mm²】   | 13047.75 |
| 最大压力【kgf】   | 37023.09 |
| ● 蹬伸期 10%   |          |
| 时长【ms】      | 130.00   |
| 平均速度【mm/ms】 | 0.23     |
| 最大面积【mm²】   | 4761.56  |
| 最大压力【kgf】   | 8931.67  |

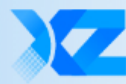

内外翻

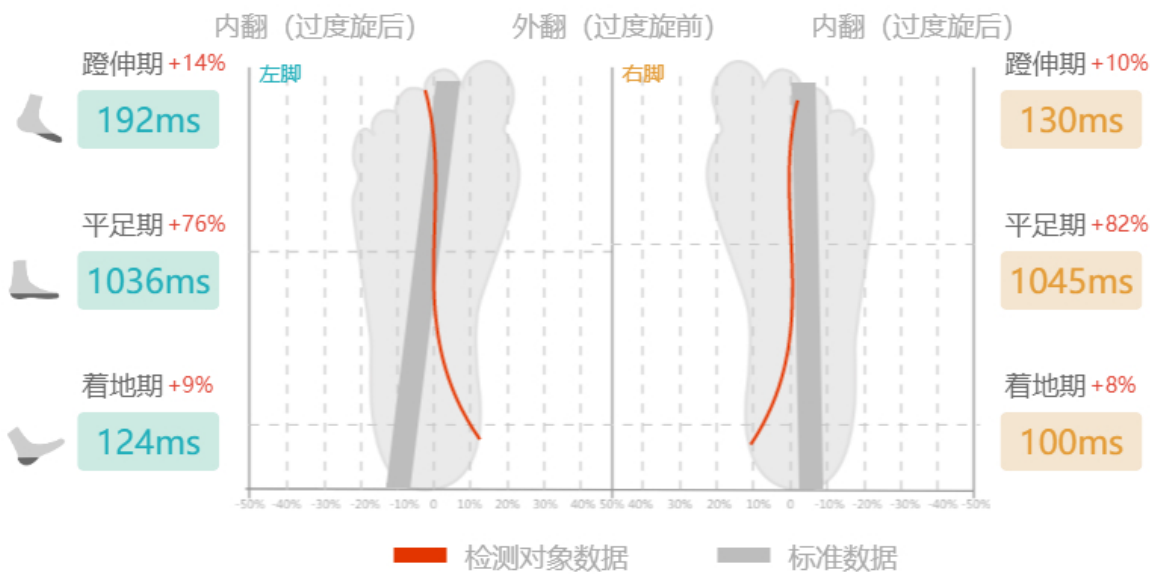

足弓类型

左脚

足弓指数 19.54%

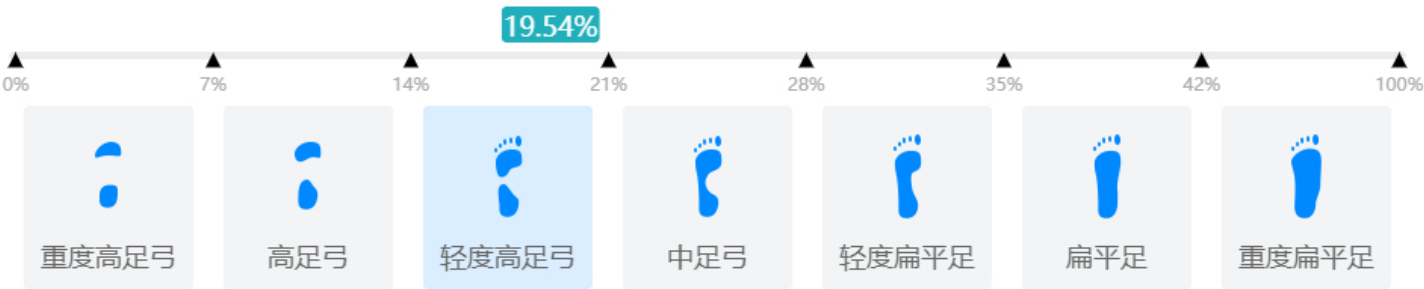

右脚

足弓指数 27.81%

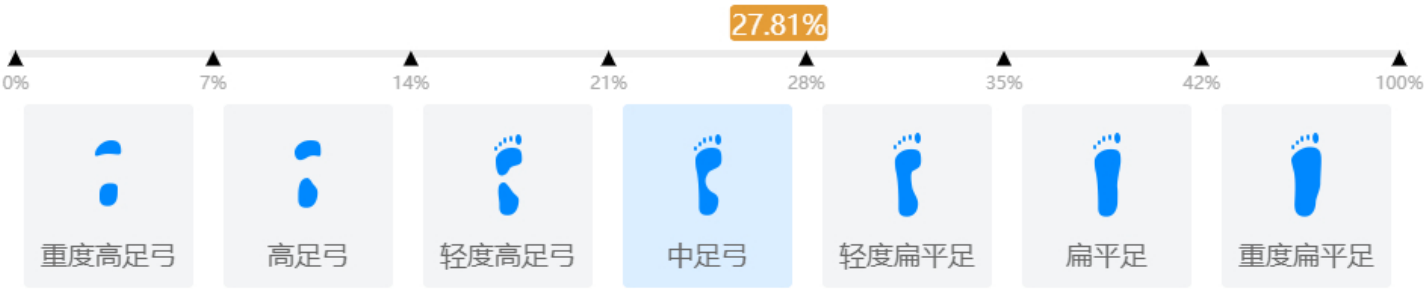

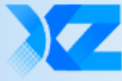

报告结论

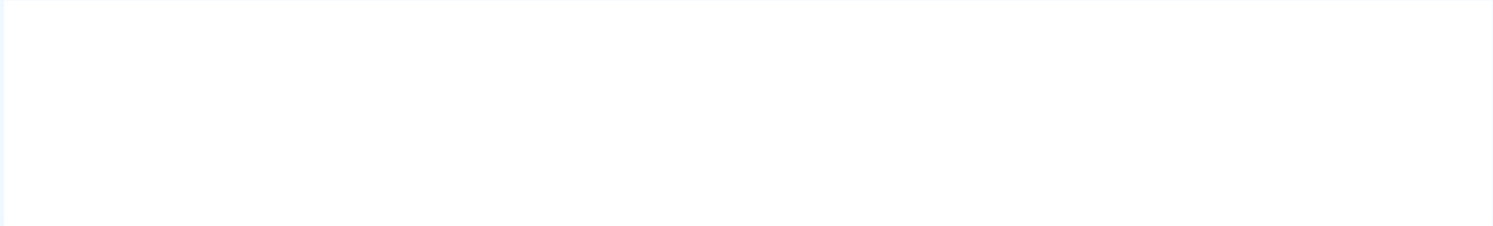

Supplement: Supplementary file 4 [file 动态报告-孙微珊-20250303204932.pdf › Plantar pressure and gait analysis/aerobics /动态报告-孙微珊-20250303204932.pdf]
