# Supplementary material for: Individualized Corrective Training Based on Precision Biomechanical Assessment for the Prevention of Sports Injuries in Adolescents
Source: Research Square preprint supplement (doi:10.21203/rs.3.rs-8426574/v1), 2026-02-02
Supplement: Supplementary file 1 [file ntelligent motion capture system.xlsx]

## Sheet: 第一次
	Intelligent action evaluation score below 3 points (first data)
		functional			flexibility					symmetry
serial number	name	Explosive Power	Landing Technique	Squat Depth	Trunk Control Ability	Trunk Mobility	Muscle Balance	Body Agility	Core Strength	Left-Right Movementsymmetry	Spinalsymmetry	Upper Limbsymmetry	Lower Limbsymmetry
1	白立慧	3	0	3	4	0	4	4	2	4	0	1	2
2	曾颖雯	2	2	2	4	2	4	0	3	3	1	3	2
3	程永慧	2	5	2	0	1	4	0	2	2	5	2	4
4	丁红丽	2	2	0	4	2	4	4	0	4	0	0	1
5	段瑶	2	0	0	4	1	4	0	0	2	1	5	2
6	冯晨一	3	0	0	0	1	0	0	0	1	1	2	3
7	冯佳琳	2	0	2	4	2	3	3	2	4	5	3	5
8	龚泳霖	2	0	5	4	1	4	2	5	4	3	3	4
9	韩雨平	2	0	2	4	3	4	0	2	4	5	3	3
10	何依雯	2	0	4	3	0	2	4	4	3	4	0	3
11	何长强	3	0	5	3	2	2	0	4	4	0	0	1
12	侯文琪	2	2	0	3	0	4	2	0	5	4	5	4
13	蒋天虹	3	0	0	4	1	4	3	0	4	2	3	2
14	李冰冰	3	4	0	4	0	4	0	0	3	0	0	1
15	梁栋	0	0	3	3	2	2	2	1	4	2	2	3
16	林茜	2	2	0	3	2	3	0	0	4	4	4	4
17	柳丹琦	2	0	0	4	2	5	0	0	4	5	0	5
18	罗桃红	2	2	2	4	4	4	3	2	4	0	0	2
19	马柯辉	0	0	3	4	3	3	0	2	3	4	5	3
20	齐家树	2	0	5	4	0	4	0	4	3	1	4	3
21	秦甜甜	2	0	3	5	2	4	0	3	4	5	3	5
22	宋璐杰	0	0	0	4	1	0	4	0	4	5	1	4
23	孙微珊	2	2	3	4	1	4	0	2	3	2	4	5
24	孙悦	2	0	0	4	0	4	5	0	4	2	3	2
25	陶奕霖	3	2	5	4	0	4	3	5	5	3	4	4
26	王佳	2	2	3	5	1	4	0	4	3	0	4	2
27	王军艳	3	4	5	5	2	5	0	4	3	3	4	4
28	王俊熙	3	4	5	4	0	4	0	5	3	5	4	5
29	王珊珊	2	2	5	4	3	4	3	4	5	0	4	2
30	王淑欣	3	4	5	5	3	0	0	4	3	3	2	4
31	王舒畅	2	2	1	0	0	0	5	2	2	3	2	4
32	王硕	2	0	4	3	3	4	0	3	2	5	3	5
33	王思奕	2	0	0	0	1	0	0	0	1	4	0	3
34	王雅楠	2	4	0	4	2	4	1	0	5	0	2	2
35	王耀彬	3	0	5	4	4	4	0	4	3	2	3	3
36	王懿佳	2	0	5	4	1	4	3	4	3	3	3	3
37	魏雨虹	2	2	2	4	2	0	4	2	3	2	4	2
38	温欢	2	0	5	4	1	5	2	4	5	4	4	4
39	毋梦鑫	2	0	2	4	1	5	0	2	3	3	3	4
40	席耘赫	2	0	0	3	3	3	3	0	5	5	4	4
41	薛培爽	3	4	5	3	3	3	0	4	2	3	2	4
42	闫静雯	3	0	5	3	3	4	0	4	3	5	3	4
43	杨帆	2	0	5	3	1	4	0	4	3	2	4	3
44	杨雯杰	2	0	0	5	1	4	3	0	4	5	5	4
45	袁欣羽	2	0	3	4	3	4	3	2	5	1	3	3
46	张东琪	3	0	3	3	0	5	0	2	2	3	4	4
47	张佳涵	2	4	0	4	4	4	3	0	5	0	0	0
48	张可云	2	2	3	4	0	4	0	2	4	4	3	5
49	张凌志	3	0	3	3	0	3	4	2	5	3	0	3
50	张文茹	2	2	0	0	5	0	0	0	1	3	0	4
51	张文雅	2	0	0	4	2	4	0	0	2	3	4	2
52	张旭博	3	0	3	3	0	0	0	3	1	0	0	2
53	张译丹	2	4	4	5	0	4	4	4	4	4	4	4
54	赵亮	2	0	3	4	1	4	3	2	4	0	3	2
55	赵院林	2	0	0	5	1	4	0	0	3	2	0	4
56	智豪龙	4	4	3	4	1	4	0	2	3	4	2	2
57	周敏	2	2	0	3	1	4	0	0	3	3	3	4
58	朱梓齐	2	5	2	3	2	3	0	2	3	0	3	1
59	3分以下	42	47	30	5	45	11	38	37	11	25	22	19
		0.72	0.81	0.52	0.0009	0.78	0.19	0.66	0.64	0.19	0.43	0.38	0.33
60	3分及以上	16	11	28	53	13	47	20	21	47	33	36	39
		0.28	0.19	0.48	0.91	0.22	0.81	0.34	0.36	0.81	0.57	0.62	0.67
62
63

## Sheet: 第二次
	Intelligent action evaluation
		functional			flexibility					symmetry
serial number	name	Explosive Power	Landing Technique	Squat Depth	Trunk Control Ability	Trunk Mobility	Muscle Balance	Body Agility	Core Strength	Left-Right Movementsymmetry	Spinalsymmetry	Upper Limbsymmetry	Lower Limbsymmetry
1	曾颖雯	3	5	0	4	4	4	0	0	3	5	3	4
2	陈明慧足球	2	0	3	4	1	4	0	2	3	4	3	4
3	陈骁田径	4	5	5	4	2	3	0	4	4	5	4	5
4	程永慧	2	2	5	0	3	4	3	4	3	0	3	2
5	段瑶健美操	3	0	3	4	3	4	0	4	3	3	4	4
6	冯佳琳	0	4	4	4	3	3	0	4	3	0	4	2
7	冯志豪田径	5	5	0	4	3	3	0	0	3	3	3	3
8	冯梦菲田径	3	3	5	5	0	4	4	4	5	2	4	3
9	龚泳霖	3	0	5	4	2	4	0	4	4	5	0	5
10	何依雯	2	2	5	4	3	4	2	4	4	3	5	4
11	蒋天虹健美操	2	2	0	5	2	4	1	0	4	4	4	3
12	李冰冰	3	0	5	4	1	0	0	5	3	0	0	2
13	李铭跳绳	3	3	3	5	3	4	0	2	4	5	4	3
14	李亚军田径	5	5	0	5	0	4	0	0	2	0	0	2
15	林茜	2	0	4	5	2	4	0	4	3	5	4	3
16	刘舒畅田径	3	4	0	4	2	4	0	0	4	4	4	4
17	刘昱辰田径	3	4	5	4	3	4	2	4	4	3	1	3
18	柳丹琦	3	0	5	4	4	4	4	4	5	5	4	5
19	罗桃红	3	5	0	5	2	4	0	0	3	0	0	3
20	马雨欣田径	2	4	0	0	2	4	0	0	2	0	4	2
21	秦甜甜健美操	3	5	5	5	2	4	0	5	3	4	5	4
22	孙微珊健美操	3	0	0	5	3	4	0	0	3	3	3	3
23	王佳健美操	3	4	0	5	0	4	3	0	5	0	0	2
24	王珊珊	3	2	5	4	0	4	0	4	3	4	5	4
25	王雅楠健美操	3	3	0	4	2	4	0	0	4	4	4	4
26	王懿佳足球	3	0	5	4	3	4	2	4	4	3	1	3
27	魏钰昕跳绳	4	5	5	4	3	0	3	4	4	0	0	1
28	温欢健美操	3	0	0	5	1	5	0	0	3	3	2	3
29	毋梦鑫跳绳	3	0	0	5	2	4	0	0	3	4	4	4
30	吴苏童田径	3	3	3	4	3	4	0	2	4	5	4	5
31	许嘉鑫田径	4	4	0	4	4	4	0	0	4	3	4	4
32	袁欣羽足球	3	3	5	4	1	4	0	3	4	4	3	4
33	张译丹跳绳	3	0	5	0	3	4	4	3	4	5	0	5
34	张文雅足球	2	4	4	4	0	4	0	4	4	2	4	3
35	赵宁跳绳	0	0	3	4	1	4	0	2	3	4	4	3
36	周雅婷跳绳	3	2	0	5	0	5	0	0	3	3	3	2
37	朱雪晴跳绳	0	4	5	4	1	4	5	4	4	2	4	3
	3分以下	10	17	14	3	22	2	30	18	2	11	10	8
		0.27	0.46	0.38	0.08	0.59	0.05	0.81	0.49	0.05	0.3	0.27	0.22
	3分及以上	27	20	23	34	15	35	7	19	35	26	27	29
		0.73	0.54	0.62	0.92	0.41	0.95	0.19	0.51	0.95	0.7	0.73	0.78

## Sheet: 两次均有
	Intelligent action evaluation
			functional				flexibility						symmetry
serial number	name		Explosive Power	Landing Technique	Squat Depth		Trunk Control Ability	Trunk Mobility	Muscle Balance	Body Agility	Core Strength		Left-Right Movementsymmetry	Spinalsymmetry	Upper Limbsymmetry	Lower Limbsymmetry		total score
1	曾颖雯	第一次	2	2	2	6	4	2	4	0	3	13	3	1	3	2	9	28
		第二次	3	5	0	8	4	4	4	0	0	12	3	5	3	4	15	35
2	程永慧	第一次	2	5	2	9	0	1	4	0	2	7	2	5	2	4	13	29
		第二次	2	2	5	9	0	3	4	3	4	14	3	0	3	2	8	31
3	段瑶健美操	第一次	2	0	0	2	4	1	4	0	0	9	2	1	5	2	10	21
		第二次	3	0	3	6	4	3	4	0	4	15	3	3	4	4	14	35
4	冯佳琳	第一次	2	0	2	4	4	2	3	3	2	14	4	5	3	5	17	35
		第二次	0	4	4	8	4	3	3	0	4	14	3	0	4	2	9	31
5	龚泳霖	第一次	2	0	5	7	4	1	4	2	5	16	4	3	3	4	14	37
		第二次	3	0	5	8	4	2	4	0	4	14	4	5	0	5	14	36
6	何依雯	第一次	2	0	4	6	3	0	2	4	4	13	3	4	0	3	10	29
		第二次	2	2	5	9	4	3	4	2	4	17	4	3	5	4	16	42
7	蒋天虹健美操	第一次	3	0	0	3	4	1	4	3	0	12	4	2	3	2	11	26
		第二次	2	2	0	4	5	2	4	1	0	12	4	4	4	3	15	31
8	李冰冰	第一次	3	4	0	7	4	0	4	0	0	8	3	0	0	1	4	19
		第二次	3	0	5	8	4	1	0	0	5	10	3	0	0	2	5	23
9	林茜	第一次	2	2	0	4	3	2	3	0	0	8	4	4	4	4	16	28
		第二次	2	0	4	6	5	2	4	0	4	15	3	5	4	3	15	36
17	柳丹琦	第一次	2	0	0	2	4	2	5	0	0	11	4	5	0	5	14	27
		第二次	3	0	5	8	4	4	4	4	4	20	5	5	4	5	19	47
18	罗桃红	第一次	2	2	2	6	4	4	4	3	2	17	4	0	0	2	6	29
		第二次	3	5	0	8	5	2	4	0	0	11	3	0	0	3	6	25
19	秦甜甜健美操	第一次	2	0	3	5	5	2	4	0	3	14	4	5	3	5	17	36
		第二次	3	5	5	13	5	2	4	0	5	16	3	4	5	4	16	45
20	孙微珊健美操	第一次	2	2	3	7	4	1	4	0	2	11	3	2	4	5	14	32
		第二次	3	0	0	3	5	3	4	0	0	12	3	3	3	3	12	27
21	王佳健美操	第一次	2	2	3	7	5	1	4	0	4	14	3	0	4	2	9	30
		第二次	3	4	0	7	5	0	4	3	0	12	5	0	0	2	7	26
22	王珊珊	第一次	2	2	5	9	4	3	4	3	4	18	5	0	4	2	11	38
		第二次	3	2	5	10	4	0	4	0	4	12	3	4	5	4	16	38
23	王雅楠健美操	第一次	2	4	0	6	4	2	4	1	0	11	5	0	2	2	9	26
		第二次	3	3	0	6	4	2	4	0	0	10	4	4	4	4	16	32
24	王懿佳足球	第一次	2	0	5	7	4	1	4	3	4	16	3	3	3	3	12	35
		第二次	3	0	5	8	4	3	4	2	4	17	4	3	1	3	11	36
25	温欢健美操	第一次	2	0	5	7	4	1	5	2	4	16	5	4	4	4	17	40
		第二次	3	0	0	3	5	1	5	0	0	11	3	3	2	3	11	25
26	毋梦鑫跳绳	第一次	2	0	2	4	4	1	5	0	2	12	3	3	3	4	13	29
		第二次	3	0	0	3	5	2	4	0	0	11	3	4	4	4	15	29
27	袁欣羽足球	第一次	2	0	3	5	4	3	4	3	2	16	5	1	3	3	12	33
		第二次	3	3	5	11	4	1	4	0	3	12	4	4	3	4	15	38
28	张文雅足球	第一次	2	0	0	2	4	2	4	0	0	10	2	3	4	2	11	23
		第二次	2	4	4	10	4	0	4	0	4	12	4	2	4	3	13	35
29	张译丹跳绳	第一次	2	4	4	10	5	0	4	4	4	17	4	4	4	4	16	43
		第二次	3	0	5	8	0	3	4	4	3	14	4	5	0	5	14	36
						提高率89.66%						提高率72.41%					提高率75.86%	提高率79.31%
						无效率10.34%						无效率27.59%					无效率24.14%	无效率20.69%
