# Supplementary material for: Individualized Corrective Training Based on Precision Biomechanical Assessment for the Prevention of Sports Injuries in Adolescents
Source: Research Square preprint supplement (doi:10.21203/rs.3.rs-8426574/v1), 2026-02-02
Supplement: Supplementary file 1 [file 动态报告-侯文琪-20250226104522.pdf › Plantar pressure and gait analysis/aerobics /动态报告-侯文琪-20250226104522.pdf]

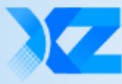

左右脚动态数据

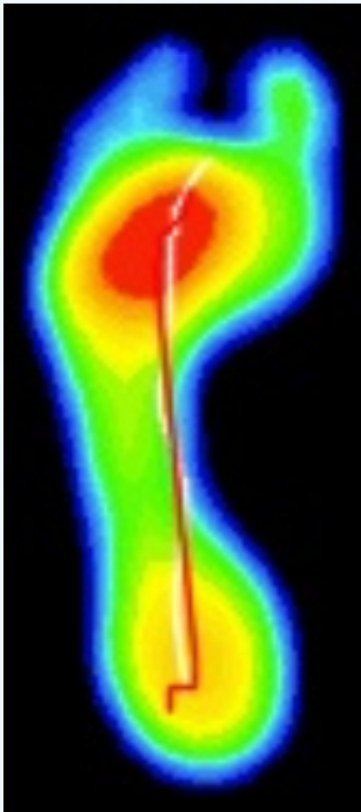

| 第1步      | Cop数据     | 第4步      |
|----------|-----------|----------|
| 172.13   | cop距离【mm】 | 206.58   |
| 2.06     | 步偏脚【°】    | 3.87     |
| 11293.55 | 面积【mm²】   | 12295.50 |
| 30967.49 | 压力【kgf】   | 36374.26 |
| 2.55     | 压强【gr/%】  | 2.81     |
| 47338.50 | 最大压力【kgf】 | 51708.14 |
| 0.19     | 速度【mm/ms】 | 0.18     |

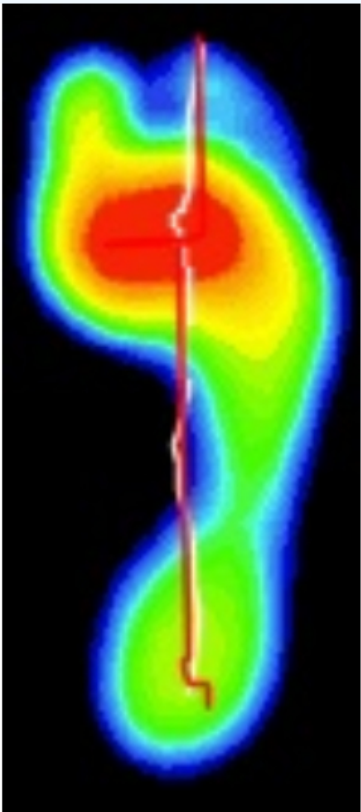

支撑相

左脚

|             |          |
|-------------|----------|
| ● 着地期 5%    |          |
| 时长【ms】      | 46.67    |
| 平均速度【mm/ms】 | 0.15     |
| 最大面积【mm²】   | 3348.38  |
| 最大压力【kgf】   | 5589.30  |
| ● 平足期 89%   |          |
| 时长【ms】      | 890.00   |
| 平均速度【mm/ms】 | 0.17     |
| 最大面积【mm²】   | 15885.38 |
| 最大压力【kgf】   | 47700.47 |
| ● 蹬伸期 6%    |          |
| 时长【ms】      | 56.67    |
| 平均速度【mm/ms】 | 0.08     |
| 最大面积【mm²】   | 4417.50  |
| 最大压力【kgf】   | 8389.30  |

右脚

|             |          |
|-------------|----------|
| ● 着地期 5%    |          |
| 时长【ms】      | 40.00    |
| 平均速度【mm/ms】 | 0.06     |
| 最大面积【mm²】   | 3782.70  |
| 最大压力【kgf】   | 7076.87  |
| ● 平足期 91%   |          |
| 时长【ms】      | 796.67   |
| 平均速度【mm/ms】 | 0.16     |
| 最大面积【mm²】   | 16435.13 |
| 最大压力【kgf】   | 51396.08 |
| ● 蹬伸期 6%    |          |
| 时长【ms】      | 64.00    |
| 平均速度【mm/ms】 | 0.22     |
| 最大面积【mm²】   | 4630.50  |
| 最大压力【kg/f】  | 7852.38  |

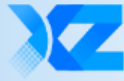

内外翻

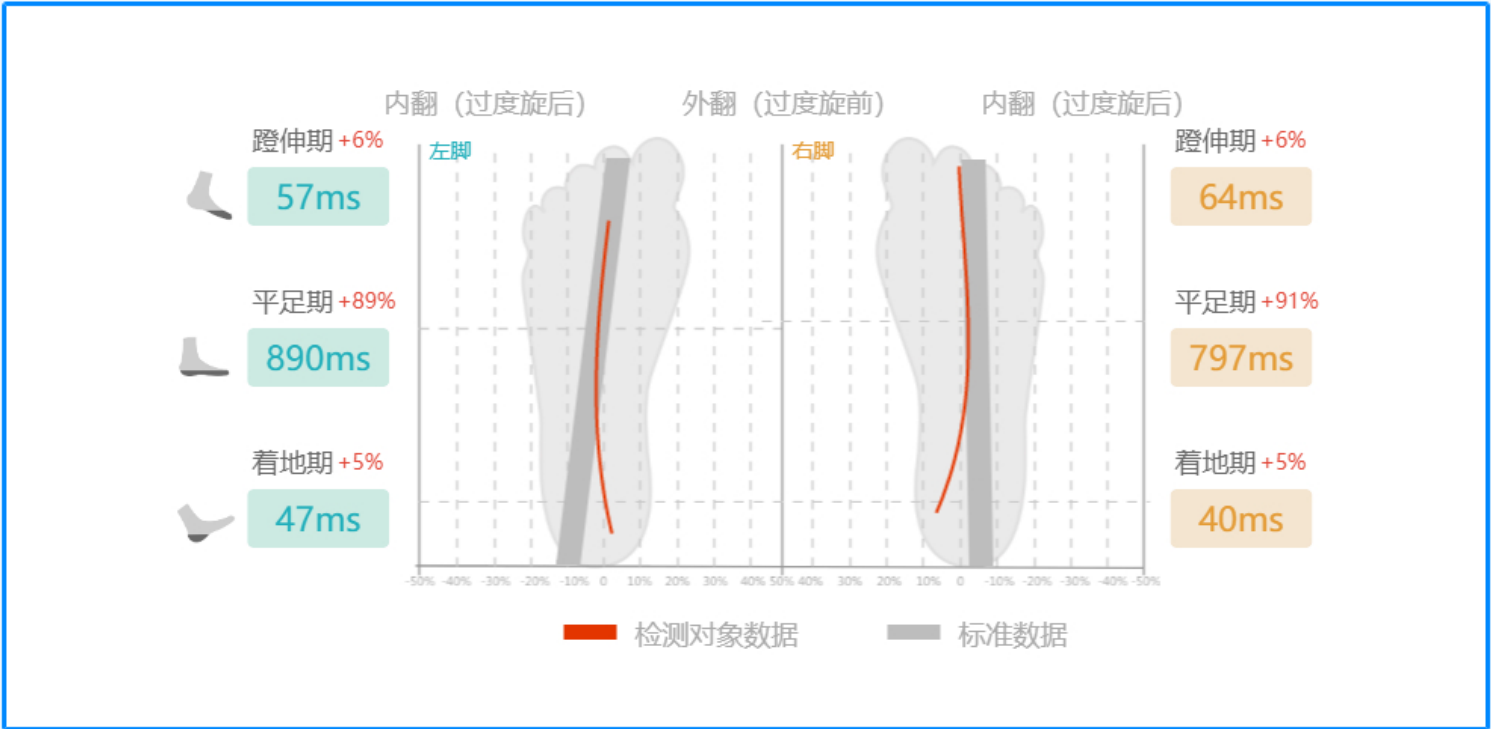

足弓类型

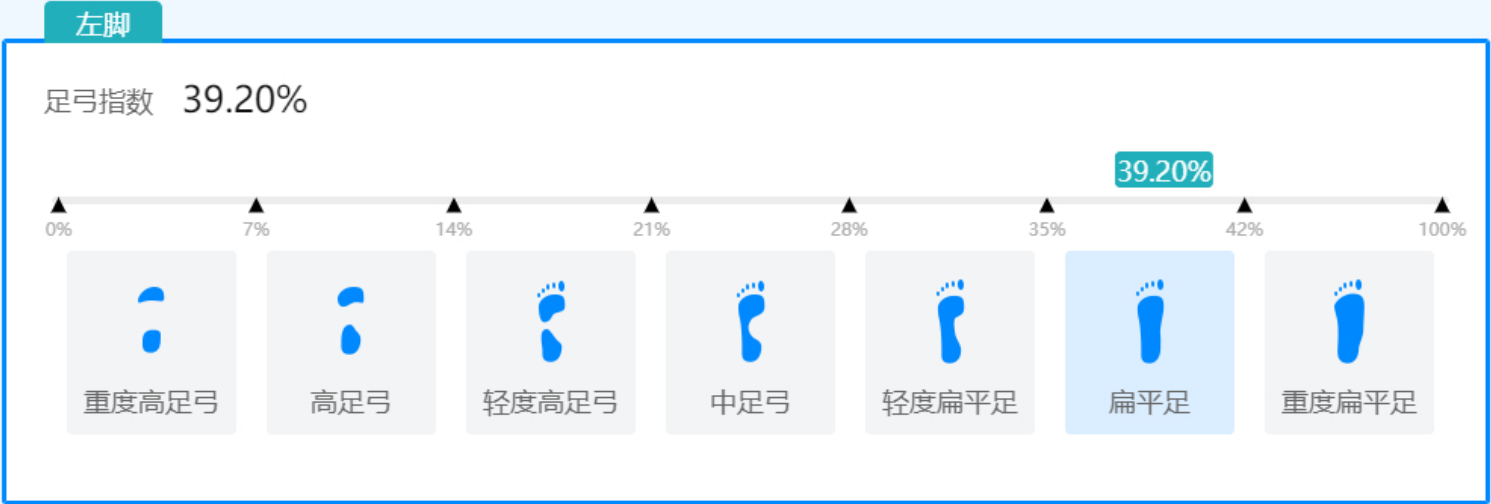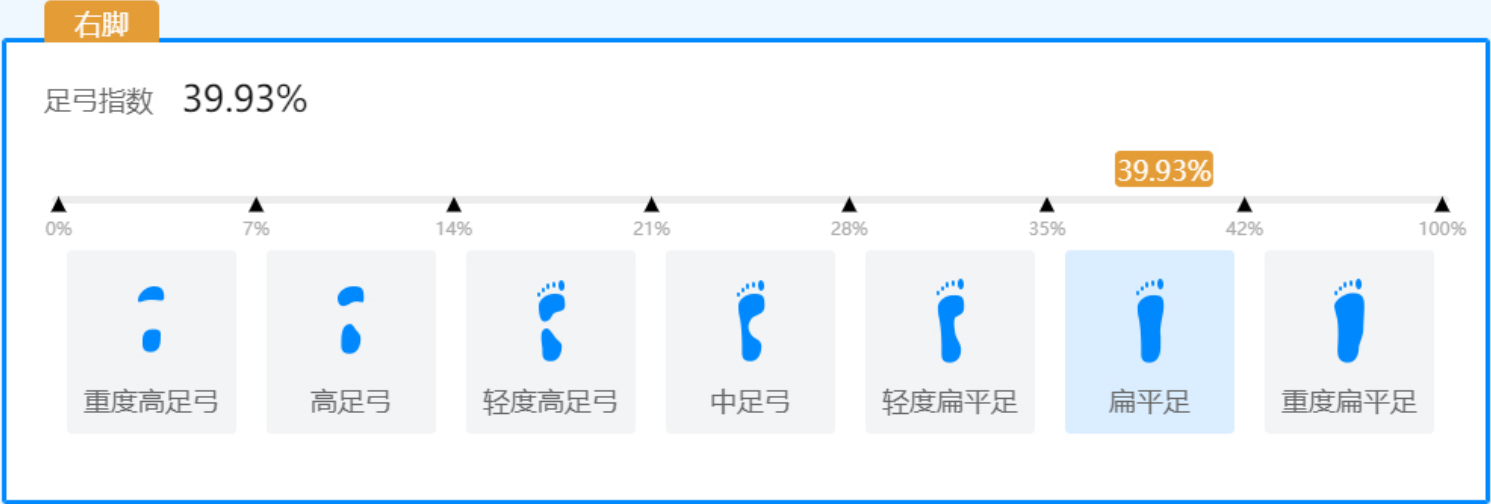

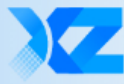

报告结论
