# Supplementary material for: Individualized Corrective Training Based on Precision Biomechanical Assessment for the Prevention of Sports Injuries in Adolescents
Source: Research Square preprint supplement (doi:10.21203/rs.3.rs-8426574/v1), 2026-02-02
Supplement: Supplementary file 2 [file 9e35a6a18f3b146fea2bfeb7.docx]

**Supplementary Materials**

**The relevant raw data for this study can be found in the "Compressed Files of Raw Data Files"**

Contains detailed results for Plantar Pressure/Gait Analysis and Digital Joint Ligament Examination, including Tables S1-S3 and Figures S1-S2.

**Plantar Pressure and Gait Analysis**

- **Plantar Pressure Analysis**

The analysis focused on four key parameters: left and right step velocity, foot progression angle, and center of pressure (COP) magnitude. Pre- and post-training measurements were compared in a sample of 20 participants. Results are summarized in Table S1.

Table 1 S1. Comparison of Bilateral Step Velocity, Foot Progression Angle, and COP Magnitude Before and After Training (n=20).

| **Parameters** | **Pre-Training (Mean ± SD)** | **Post-Training (Mean ± SD)** | **Mean Difference**  **(M±SD)** | **t-value** | **p-value** |
| --- | --- | --- | --- | --- | --- |
| **Left Step Velocity (m/s)** | **0.20 ± 0.03** | **0.22 ± 0.03** | **-0.02 ± 0.03** | **-3.38** | **0.003** |
| **Right Step Velocity (m/s)** | **0.20 ± 0.04** | **0.21 ± 0.04** | **-0.01 ± 0.04** | **-1.48** | **0.155** |
| **Left Foot Progression Angle  (°)** | **6.51 ± 3.09** | **3.28 ± 7.35** | **3.31 ± 6.80** | **2.13** | **0.047** |
| **Right Foot Progression Angle(°)** | **5.74 ± 4.39** | **5.99 ± 6.44** | **-0.25 ± 6.27** | **-0.18** | **0.860** |
| **Left COP**  **Magnitude**  **(kgf)** | **2.33 ± 0.20** | **2.33 ± 0.17** | **0.00 ± 0.16** | **0.01** | **0.995** |
| **Right COP**  **Magnitude**  **(kgf)** | **2.29 ± 0.19** | **2.30 ± 0.16** | **-0.01 ± 0.17** | **-0.34** | **0.735** |

The results indicate a statistically significant reduction in the left foot progression angle following training (mean decrease = 3.31°, p = 0.047). Left step velocity also increased significantly (p = 0.003). These findings suggest that the personalized corrective training program led to measurable improvements in gait biomechanics, particularly on the left side.

- **Symmetry Analysis**

Bilateral symmetry was assessed by calculating the absolute difference between left and right values (|L–R|) for each parameter before and after the intervention. Results are presented in Table S2.

Table S2. Analysis of Bilateral Symmetry Before and After Training.

| **Parameter** | **Pre-Training (Mean ± SD)** | **Post-Training (Mean ± SD)** | **Change (Post - Pre)**  **(Mean ± SD)** | **t-value** | **p-value** |
| --- | --- | --- | --- | --- | --- |
| **Step Velocity |L-R|**  **(m/s)** | **0.03 ± 0.02** | **0.03 ± 0.02** | **0.00 ± 0.02** | **0.75** | **0.465** |
| **Foot Progression Angle |L-R| (°)** | **5.02 ± 3.68** | **7.68 ± 5.89** | **2.66 ± 5.92** | **2.01** | **0.059** |
| **COP Plantar Pressure |L-R| (kgf)** | **0.13 ± 0.11** | **0.15 ± 0.12** | **0.02 ± 0.13** | **0.79** | **0.438** |

Note: A negative change value would indicate improved symmetry (reduced asymmetry).

No significant changes in bilateral symmetry were observed for any of the parameters following the training intervention. Although the asymmetry in foot progression angle showed a trend toward increase (p = 0.059), it did not reach statistical significance.

**Digital Joint Ligament Examination**

A digital joint testing device was used to assess anterior cruciate ligament (ACL) tension under incremental loads (80N, 100N, 120N, 150N). Data from 44 participants are shown in Table S3.

Table S3. ACL Displacement and Side-to-Side Difference (SSD) Before and After Training.

| **Data Category** | **Pre-Training (Mean ± SD)** | **Post-Training (Mean ± SD)** | **t-value** | **p-value** |
| --- | --- | --- | --- | --- |
| **Left Displacement（80N）** | **11.00±2.48** | **10.71±1.64** | **0.63** | **0.53** |
| **Right Displacement（80N）** | **11.98±1.99** | **12.09±2.58** | **-0.11** | **0.85** |
| **SSD（80N）** | **1.60±0.98** | **2.39±2.25** | **-0.80** | **0.09** |
| **Left Displacement（100N）** | **12.97±2.21** | **12.61±1.90** | **0.81** | **0.43** |
| **Right Displacement（100N）** | **13.78±2.21** | **13.87±2.78** | **-0.15** | **0.88** |
| **SSD（100N）** | **1.62±1.15** | **2.64±2.50** | **-1.95** | **0.07** |
| **Left Displacement（120N）** | **14.29±2.4** | **13.91±2.02** | **0.78** | **0.44** |
| **Right Displacement（120N）** | **15.2±2.3** | **15.24±2.83** | **-0.06** | **0.95** |
| **SSD（120N）** | **1.6±1.31** | **2.64±2.5** | **-1.82** | **0.08** |
| **Left Displacement（150N）** | **16.09±2.59** | **15.84±2.39** | **0.45** | **0.65** |
| **Right Displacement（150N）** | **16.58±2.14** | **16.49±4.53** | **0.08** | **0.94** |
| **SSD（150N）** | **1.74±1.46** | **3.01±2.83** | **-1.88** | **0.07** |

Note: SSD = Side-to-Side Difference (absolute difference between left and right displacement under the same load).

Paired t-tests revealed no statistically significant changes in ACL displacement for either limb across all loading conditions following the intervention. Similarly, while SSD values showed a tendency to increase post-training (p-values approaching 0.05), these changes did not reach conventional significance levels, indicating that the training program did not substantially alter ACL mechanical properties or bilateral symmetry in the short term.
