# Supplementary material for: Individualized Corrective Training Based on Precision Biomechanical Assessment for the Prevention of Sports Injuries in Adolescents
Source: Research Square preprint supplement (doi:10.21203/rs.3.rs-8426574/v1), 2026-02-02
Supplement: Supplementary file 2 [file 动态报告-冯晨一-20250226101747.pdf › Plantar pressure and gait analysis/aerobics /动态报告-冯晨一-20250226101747.pdf]

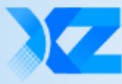

左右脚动态数据

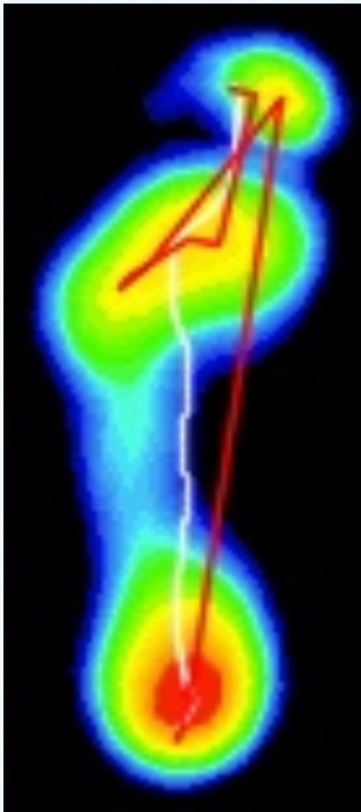

| 第1步      | Cop数据     | 第2步      |
|----------|-----------|----------|
| 210.18   | cop距离【mm】 | 217.36   |
| 13.26    | 步偏脚【°】    | 33.39    |
| 9288.18  | 面积【mm²】   | 8552.58  |
| 19814.53 | 压力【kgf】   | 19423.84 |
| 2.06     | 压强【gr/%】  | 2.21     |
| 32339.75 | 最大压力【kgf】 | 28865.66 |
| 0.21     | 速度【mm/ms】 | 0.27     |

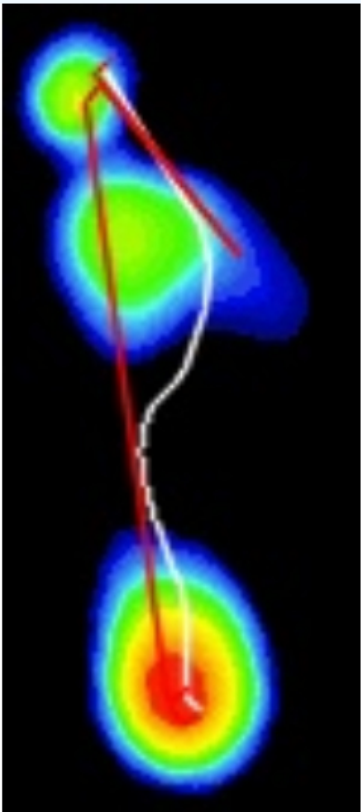

支撑相

左脚

|             |          |
|-------------|----------|
| ● 着地期 12%   |          |
| 时长【ms】      | 120.00   |
| 平均速度【mm/ms】 | 0.11     |
| 最大面积【mm²】   | 3758.46  |
| 最大压力【kgf】   | 9169.31  |
| ● 平足期 83%   |          |
| 时长【ms】      | 865.71   |
| 平均速度【mm/ms】 | 0.18     |
| 最大面积【mm²】   | 13721.46 |
| 最大压力【kgf】   | 32359.04 |
| ● 蹬伸期 7%    |          |
| 时长【ms】      | 70.00    |
| 平均速度【mm/ms】 | 0.41     |
| 最大面积【mm²】   | 4135.88  |
| 最大压力【kgf】   | 4957.10  |

右脚

|             |          |
|-------------|----------|
| ● 着地期 9%    |          |
| 时长【ms】      | 90.00    |
| 平均速度【mm/ms】 | 0.14     |
| 最大面积【mm²】   | 3813.00  |
| 最大压力【kgf】   | 8577.28  |
| ● 平足期 84%   |          |
| 时长【ms】      | 880.00   |
| 平均速度【mm/ms】 | 0.17     |
| 最大面积【mm²】   | 14750.25 |
| 最大压力【kgf】   | 32765.24 |
| ● 蹬伸期 8%    |          |
| 时长【ms】      | 83.33    |
| 平均速度【mm/ms】 | 0.45     |
| 最大面积【mm²】   | 4101.00  |
| 最大压力【kg/f】  | 6179.77  |

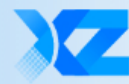

内外翻

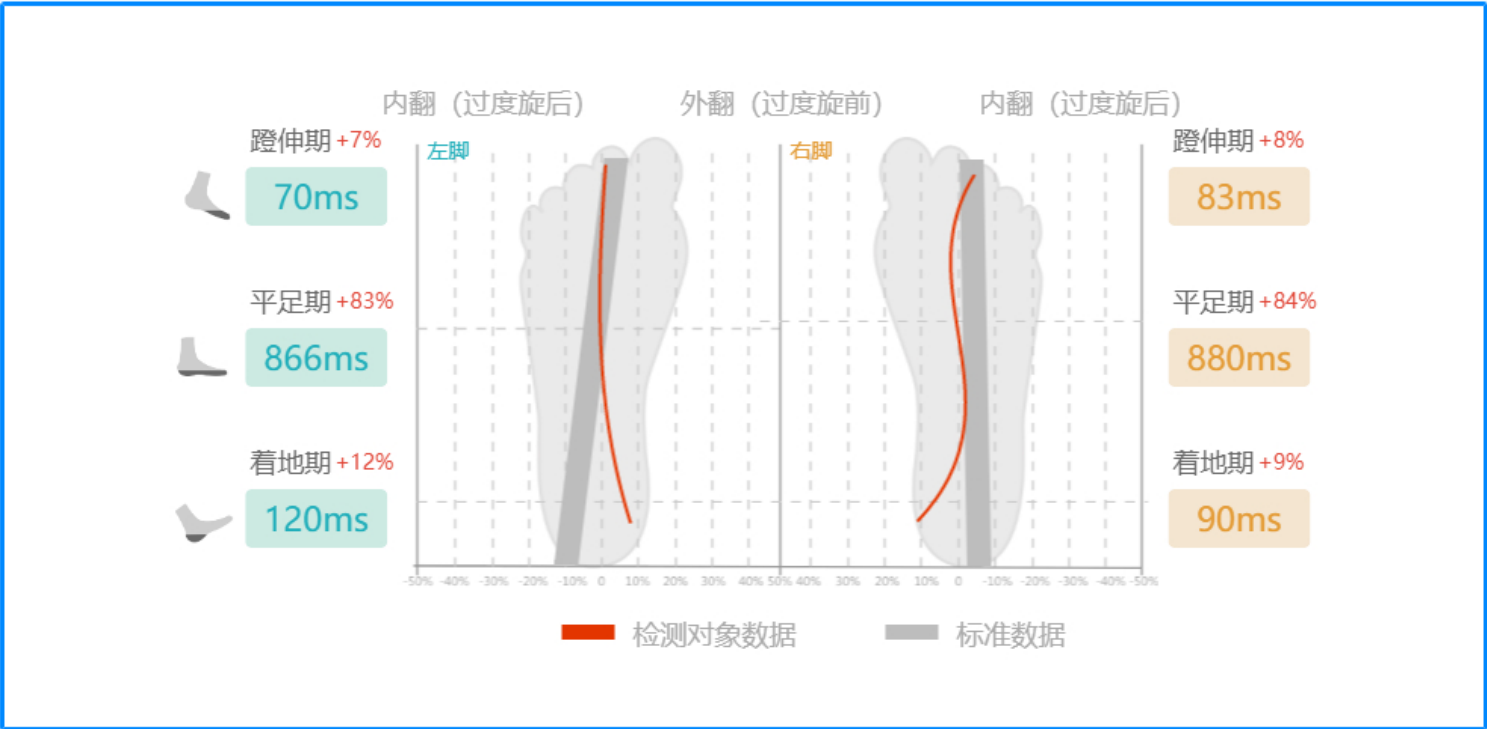

足弓类型

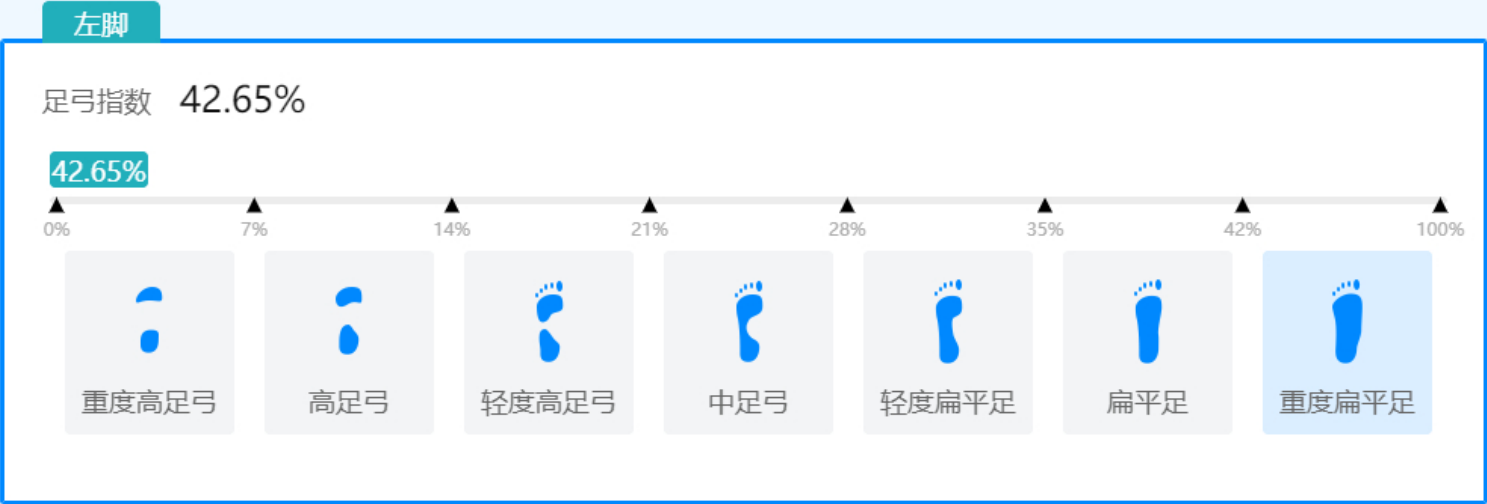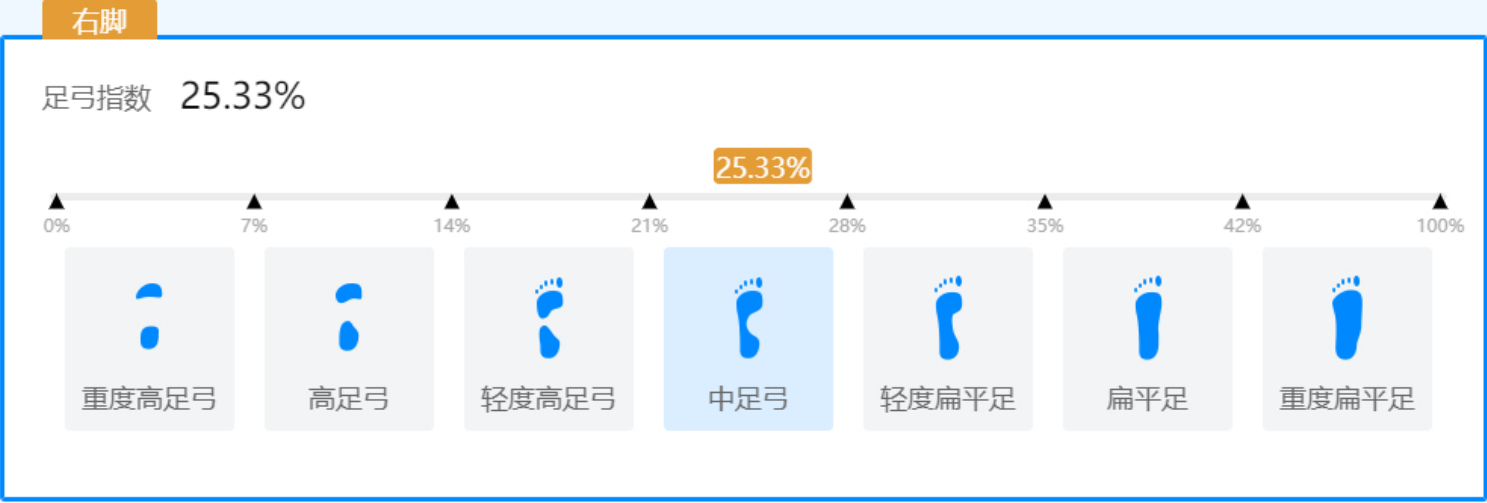

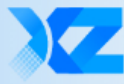

报告结论
