# Supplementary material for: Individualized Corrective Training Based on Precision Biomechanical Assessment for the Prevention of Sports Injuries in Adolescents
Source: Research Square preprint supplement (doi:10.21203/rs.3.rs-8426574/v1), 2026-02-02
Supplement: Supplementary file 3 [file 动态报告-周敏-20250226100701.pdf › Plantar pressure and gait analysis/aerobics /动态报告-周敏-20250226100701.pdf]

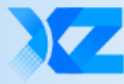

左右脚动态数据

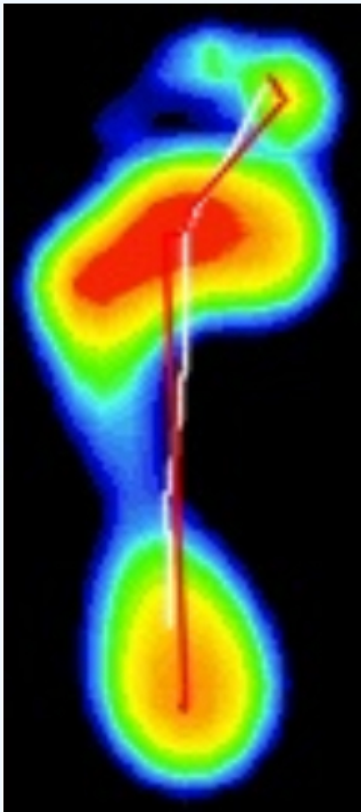

| 第2步      | Cop数据     | 第1步      |
|----------|-----------|----------|
| 192.32   | cop距离【mm】 | 202.38   |
| 0.26     | 步偏脚【°】    | 3.56     |
| 10460.81 | 面积【mm²】   | 10043.95 |
| 23783.31 | 压力【kgf】   | 23462.62 |
| 2.12     | 压强【gr/%】  | 2.14     |
| 34392.84 | 最大压力【kgf】 | 37556.59 |
| 0.24     | 速度【mm/ms】 | 0.25     |

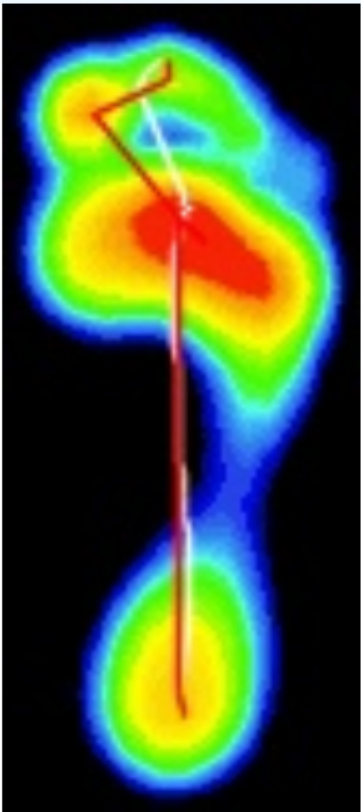

支撑相

左脚

|             |          |
|-------------|----------|
| ● 着地期 11%   |          |
| 时长【ms】      | 36.67    |
| 平均速度【mm/ms】 | 0.28     |
| 最大面积【mm²】   | 4092.00  |
| 最大压力【kgf】   | 4399.83  |
| ● 平足期 80%   |          |
| 时长【ms】      | 548.57   |
| 平均速度【mm/ms】 | 0.22     |
| 最大面积【mm²】   | 14336.68 |
| 最大压力【kgf】   | 33057.99 |
| ● 蹬伸期 12%   |          |
| 时长【ms】      | 90.00    |
| 平均速度【mm/ms】 | 0.42     |
| 最大面积【mm²】   | 6552.00  |
| 最大压力【kgf】   | 14337.17 |

右脚

|             |          |
|-------------|----------|
| ● 着地期 6%    |          |
| 时长【ms】      | 48.00    |
| 平均速度【mm/ms】 | 0.22     |
| 最大面积【mm²】   | 3833.55  |
| 最大压力【kgf】   | 5418.21  |
| ● 平足期 82%   |          |
| 时长【ms】      | 653.33   |
| 平均速度【mm/ms】 | 0.20     |
| 最大面积【mm²】   | 14569.88 |
| 最大压力【kgf】   | 37610.50 |
| ● 蹬伸期 13%   |          |
| 时长【ms】      | 100.00   |
| 平均速度【mm/ms】 | 0.44     |
| 最大面积【mm²】   | 6013.13  |
| 最大压力【kgf】   | 12073.65 |

内外翻

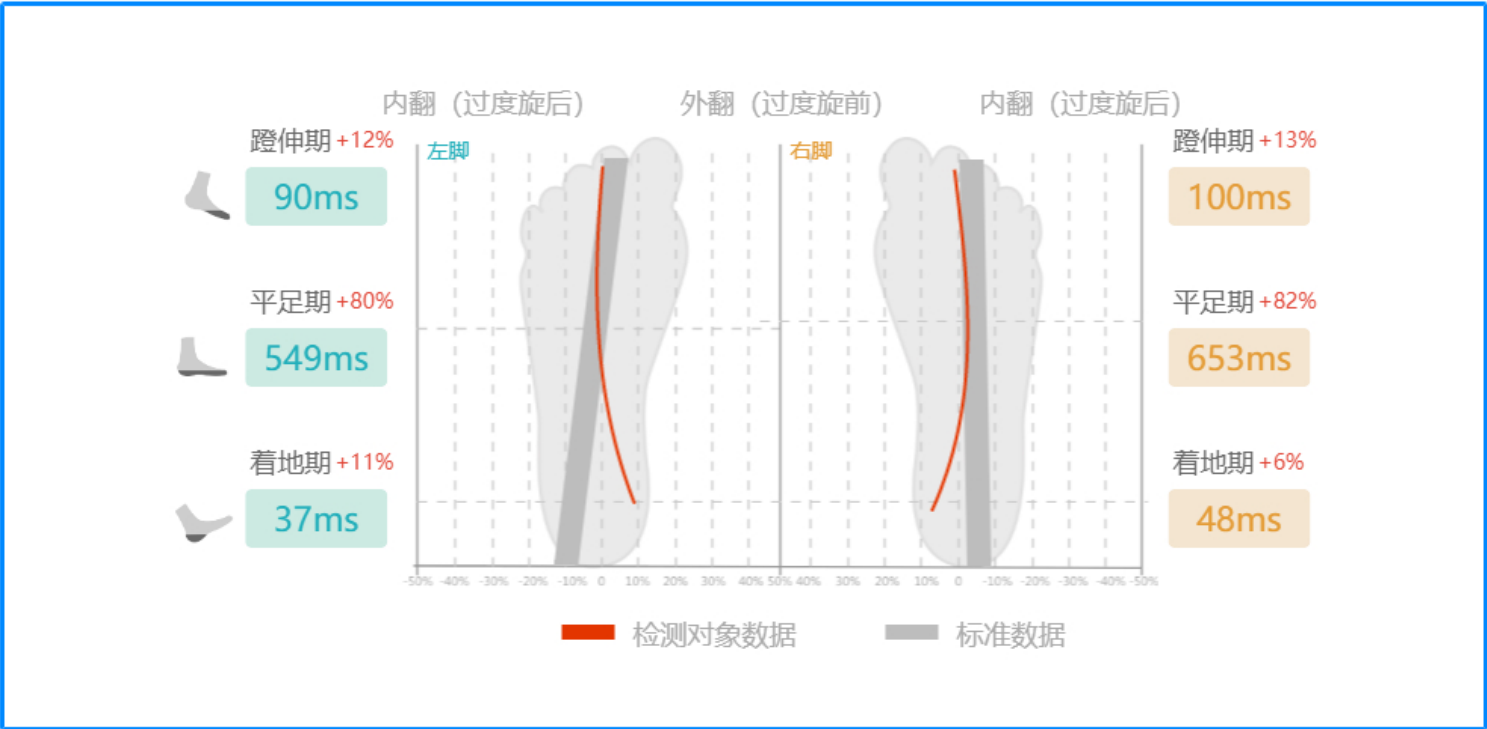

足弓类型

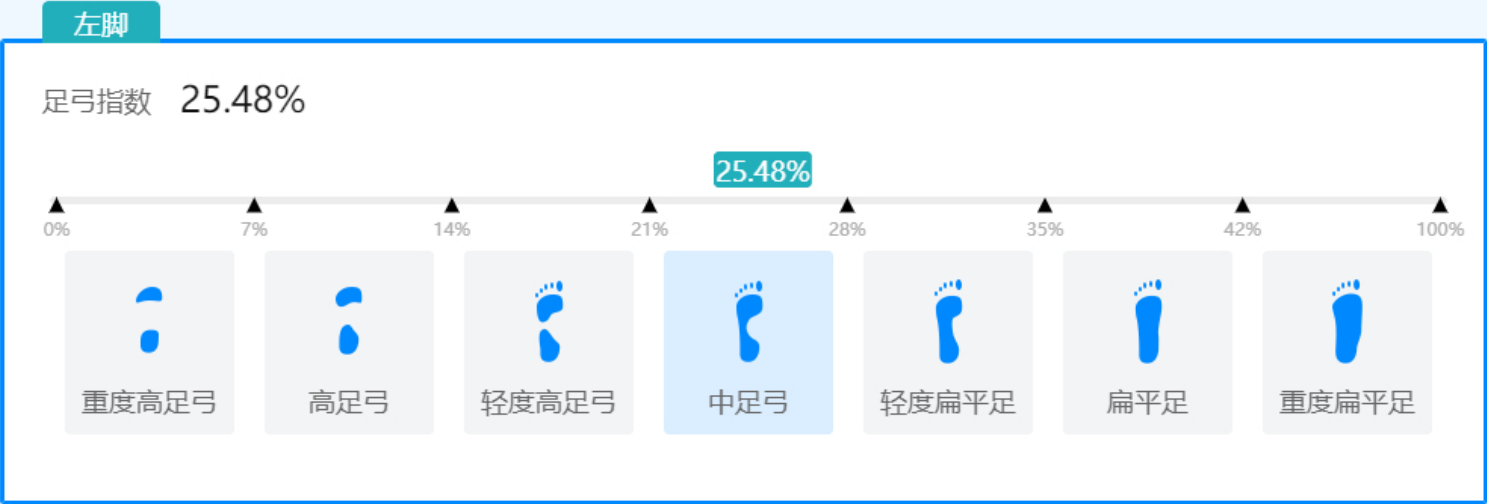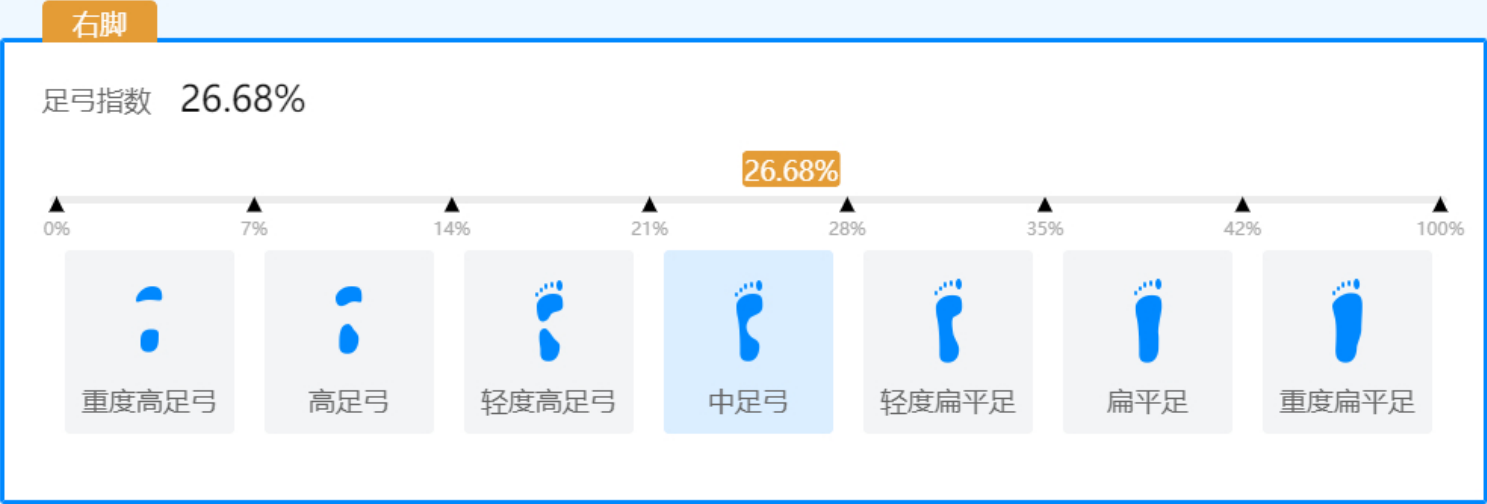



报告结论
