# Supplementary material for: Individualized Corrective Training Based on Precision Biomechanical Assessment for the Prevention of Sports Injuries in Adolescents
Source: Research Square preprint supplement (doi:10.21203/rs.3.rs-8426574/v1), 2026-02-02
Supplement: Supplementary file 5 [file 动态报告-孙悦-20250226102332.pdf › Plantar pressure and gait analysis/aerobics /动态报告-孙悦-20250226102332.pdf]

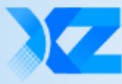

左右脚动态数据

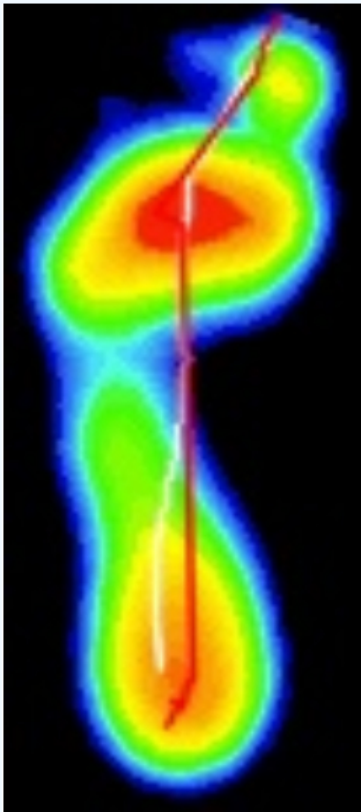

| 第1步      | Cop数据     | 第2步      |
|----------|-----------|----------|
| 199.77   | cop距离【mm】 | 251.40   |
| 23.72    | 步偏脚【°】    | 17.07    |
| 10572.35 | 面积【mm²】   | 9117.50  |
| 24221.92 | 压力【kgf】   | 21416.92 |
| 2.12     | 压强【gr/%】  | 2.18     |
| 34228.05 | 最大压力【kgf】 | 35318.03 |
| 0.20     | 速度【mm/ms】 | 0.25     |

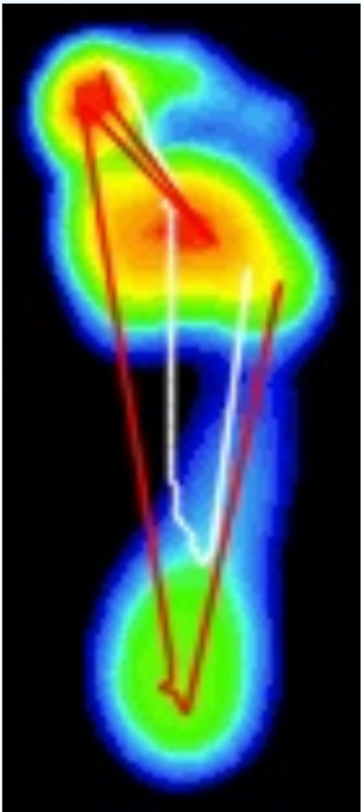

支撑相

左脚

|             |          |
|-------------|----------|
| ● 着地期 2%    |          |
| 时长【ms】      | 22.86    |
| 平均速度【mm/ms】 | 0.01     |
| 最大面积【mm²】   | 1812.86  |
| 最大压力【kgf】   | 1407.62  |
| ● 平足期 87%   |          |
| 时长【ms】      | 940.00   |
| 平均速度【mm/ms】 | 0.15     |
| 最大面积【mm²】   | 14385.86 |
| 最大压力【kgf】   | 36118.80 |
| ● 蹬伸期 11%   |          |
| 时长【ms】      | 117.14   |
| 平均速度【mm/ms】 | 0.26     |
| 最大面积【mm²】   | 4452.43  |
| 最大压力【kgf】   | 6919.73  |

右脚

|             |          |
|-------------|----------|
| ● 着地期 2%    |          |
| 时长【ms】      | 20.00    |
| 平均速度【mm/ms】 | 0.00     |
| 最大面积【mm²】   | 1423.69  |
| 最大压力【kgf】   | 938.45   |
| ● 平足期 89%   |          |
| 时长【ms】      | 1000.00  |
| 平均速度【mm/ms】 | 0.18     |
| 最大面积【mm²】   | 14989.50 |
| 最大压力【kgf】   | 36844.86 |
| ● 蹬伸期 10%   |          |
| 时长【ms】      | 110.00   |
| 平均速度【mm/ms】 | 0.19     |
| 最大面积【mm²】   | 3537.75  |
| 最大压力【kg/f】  | 4416.91  |

内外翻

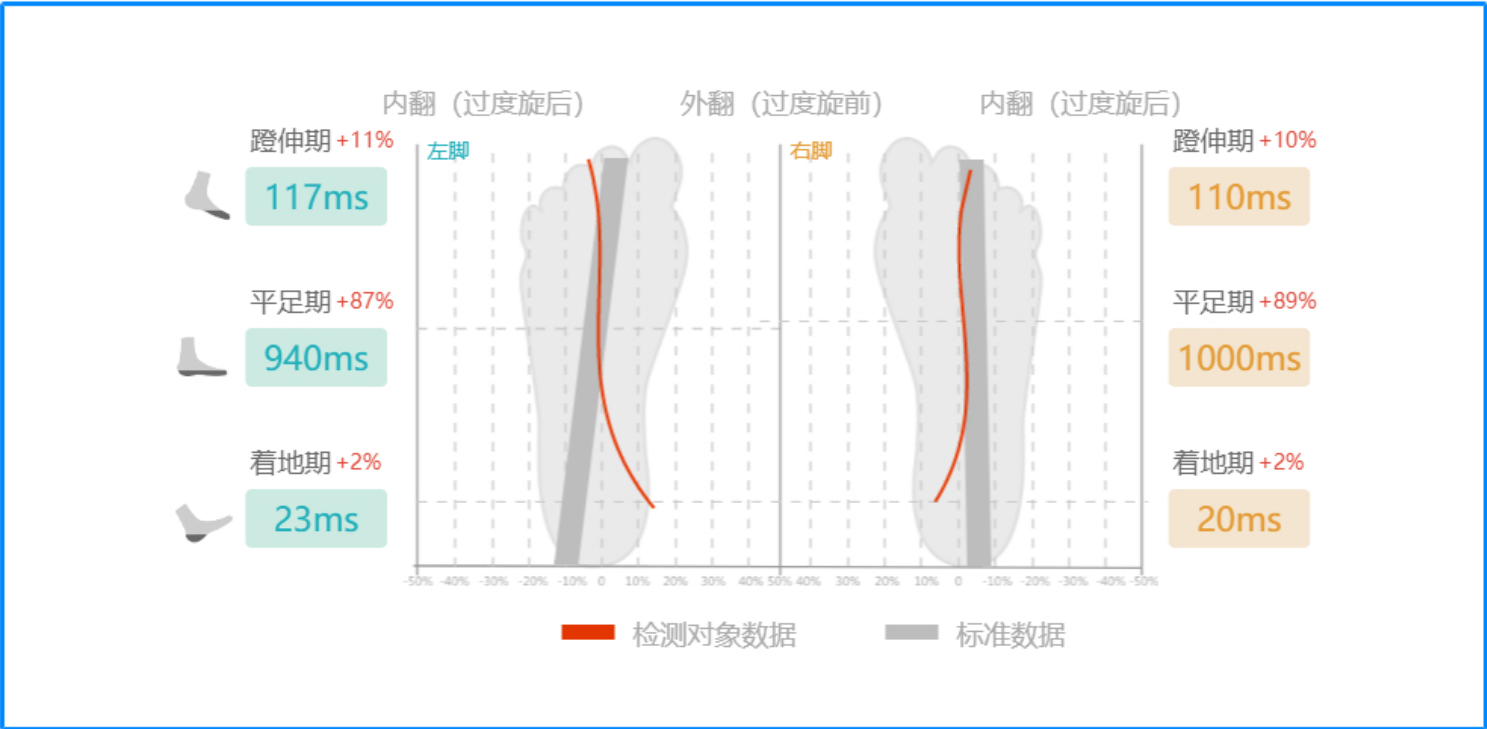

足弓类型

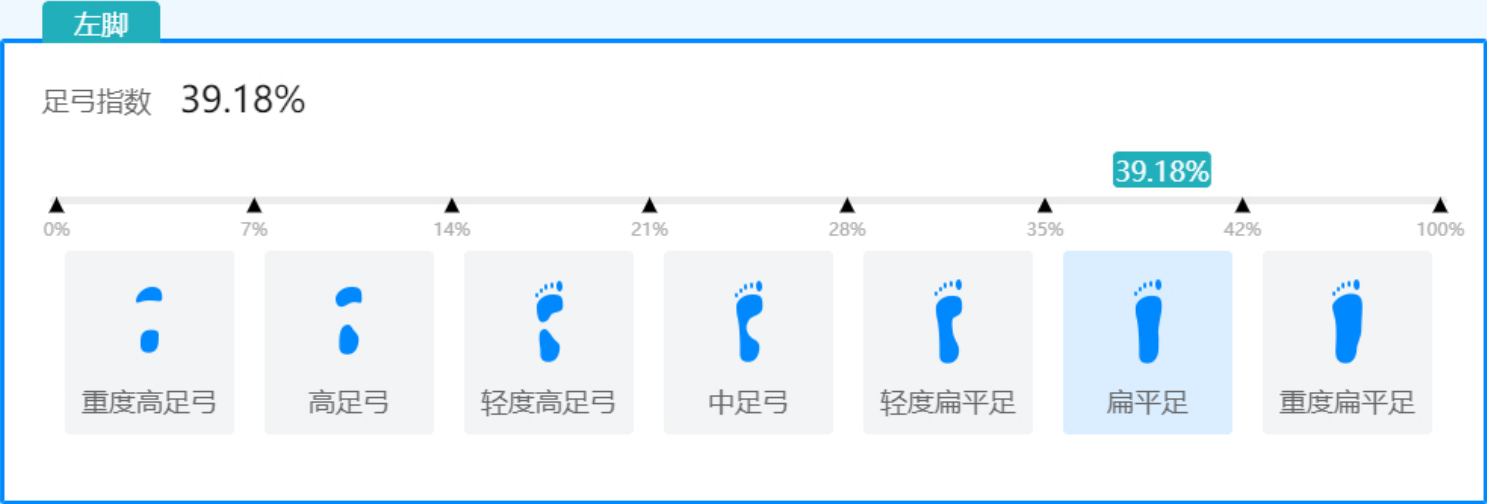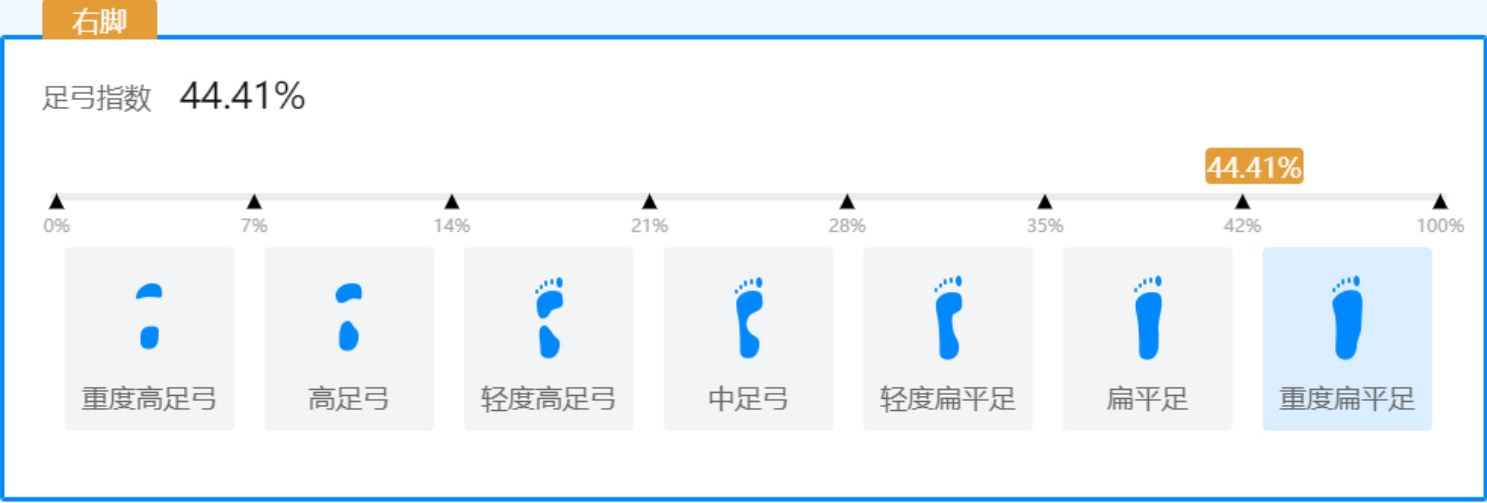

## 动态报告

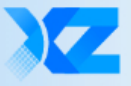

## 报告结论
