# Supplementary material for: Individualized Corrective Training Based on Precision Biomechanical Assessment for the Prevention of Sports Injuries in Adolescents
Source: Research Square preprint supplement (doi:10.21203/rs.3.rs-8426574/v1), 2026-02-02
Supplement: Supplementary file 6 [file 动态报告-宋璐杰-20250226094847.pdf › Plantar pressure and gait analysis/aerobics /动态报告-宋璐杰-20250226094847.pdf]

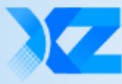

左右脚动态数据

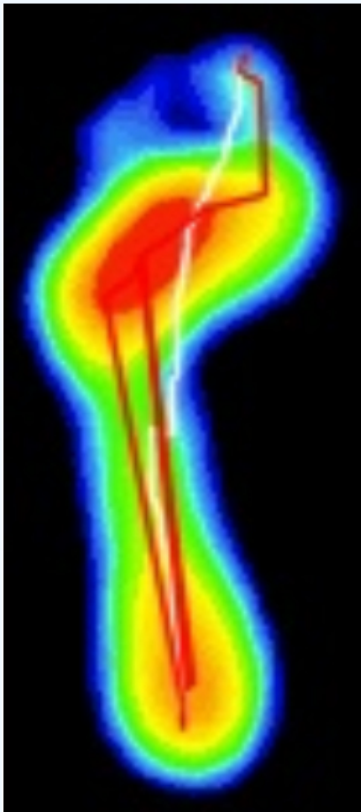

| 第6步      | Cop数据     | 第1步      |
|----------|-----------|----------|
| 205.52   | cop距离【mm】 | 211.49   |
| 12.22    | 步偏脚【°】    | 1.85     |
| 9804.25  | 面积【mm²】   | 8913.54  |
| 24944.63 | 压力【kgf】   | 20231.22 |
| 2.38     | 压强【gr/%】  | 2.07     |
| 34432.00 | 最大压力【kgf】 | 32441.39 |
| 0.20     | 速度【mm/ms】 | 0.22     |

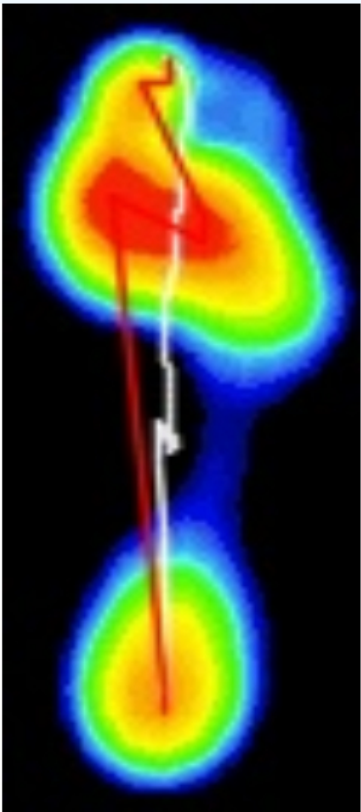

支撑相

左脚

|             |          |
|-------------|----------|
| ● 着地期 5%    |          |
| 时长【ms】      | 46.67    |
| 平均速度【mm/ms】 | 0.12     |
| 最大面积【mm²】   | 3342.00  |
| 最大压力【kgf】   | 5671.18  |
| ● 平足期 87%   |          |
| 时长【ms】      | 840.00   |
| 平均速度【mm/ms】 | 0.18     |
| 最大面积【mm²】   | 13355.25 |
| 最大压力【kgf】   | 34873.34 |
| ● 蹬伸期 8%    |          |
| 时长【ms】      | 80.00    |
| 平均速度【mm/ms】 | 0.33     |
| 最大面积【mm²】   | 4657.50  |
| 最大压力【kgf】   | 7792.22  |

右脚

|             |          |
|-------------|----------|
| ● 着地期 6%    |          |
| 时长【ms】      | 42.86    |
| 平均速度【mm/ms】 | 0.05     |
| 最大面积【mm²】   | 2950.39  |
| 最大压力【kgf】   | 5320.24  |
| ● 平足期 89%   |          |
| 时长【ms】      | 795.00   |
| 平均速度【mm/ms】 | 0.19     |
| 最大面积【mm²】   | 13190.91 |
| 最大压力【kgf】   | 33404.66 |
| ● 蹬伸期 6%    |          |
| 时长【ms】      | 57.14    |
| 平均速度【mm/ms】 | 0.30     |
| 最大面积【mm²】   | 3859.07  |
| 最大压力【kgf】   | 4636.62  |

内外翻

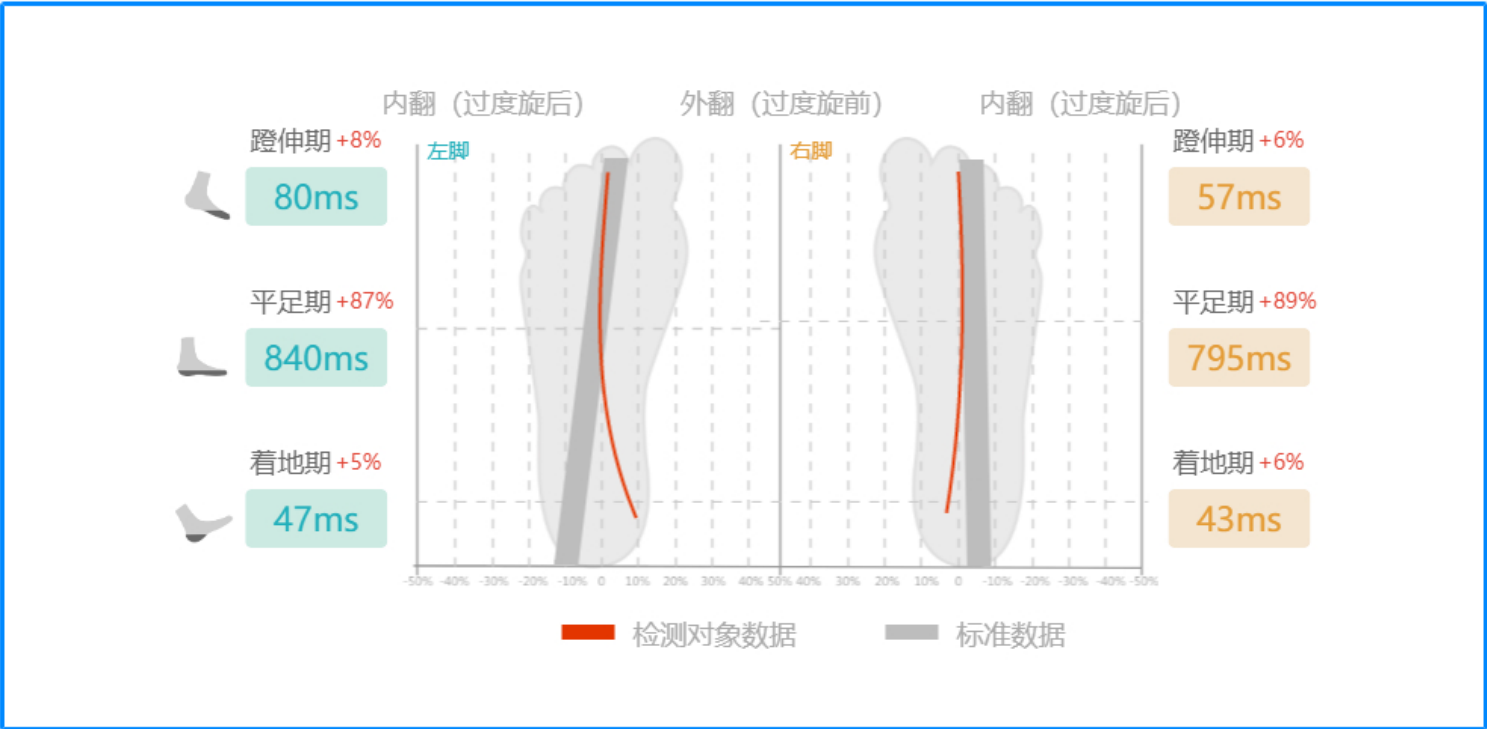

足弓类型

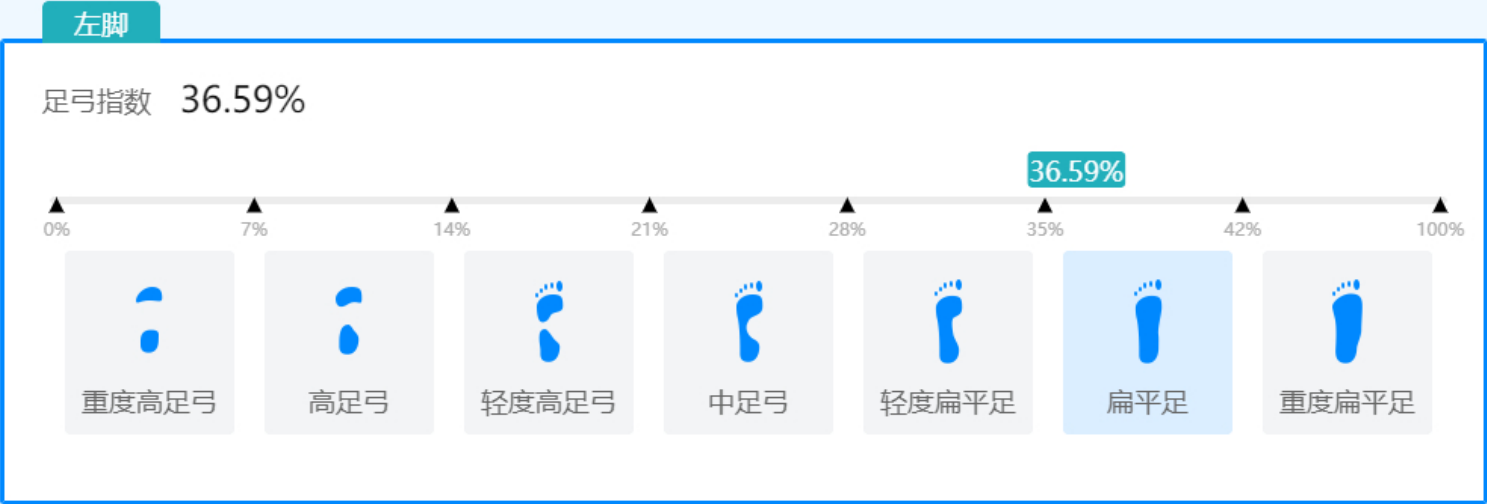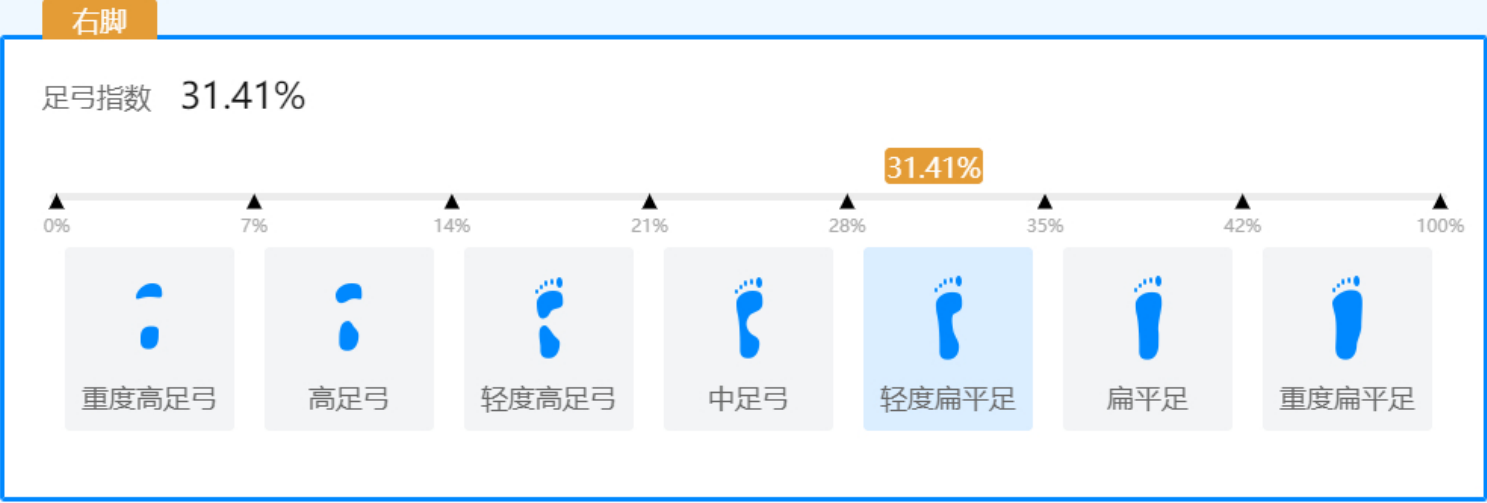

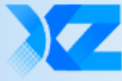

报告结论
