# Supplementary material for: Individualized Corrective Training Based on Precision Biomechanical Assessment for the Prevention of Sports Injuries in Adolescents
Source: Research Square preprint supplement (doi:10.21203/rs.3.rs-8426574/v1), 2026-02-02
Supplement: Supplementary file 7 [file 动态报告-张东琪-20250226103046.pdf › Plantar pressure and gait analysis/aerobics /动态报告-张东琪-20250226103046.pdf]

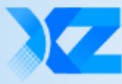

左右脚动态数据

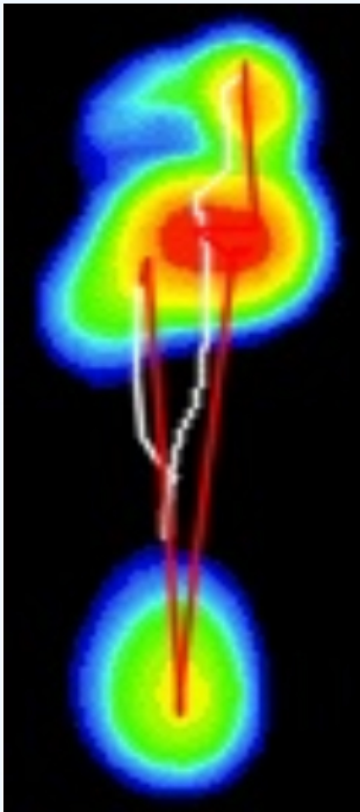

| 第1步      | Cop数据     | 第2步      |
|----------|-----------|----------|
| 229.57   | cop距离【mm】 | 418.63   |
| -4.20    | 步偏脚【°】    | -13.45   |
| 8090.35  | 面积【mm²】   | 8089.83  |
| 19347.27 | 压力【kgf】   | 21465.01 |
| 2.23     | 压强【gr/%】  | 2.51     |
| 32217.08 | 最大压力【kgf】 | 39075.58 |
| 0.16     | 速度【mm/ms】 | 0.23     |

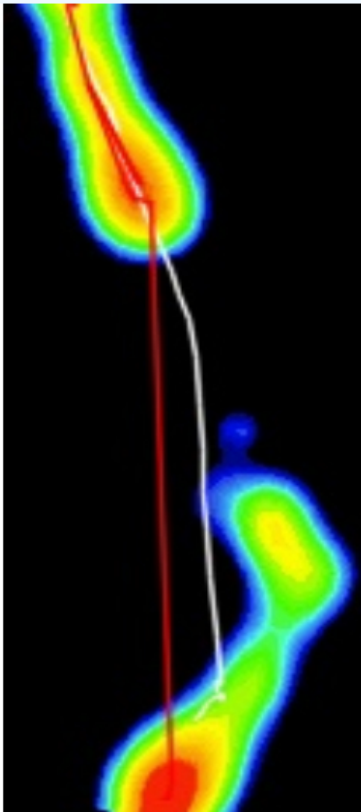

支撑相

左脚

|             |          |
|-------------|----------|
| ● 着地期 2%    |          |
| 时长【ms】      | 30.00    |
| 平均速度【mm/ms】 | 0.07     |
| 最大面积【mm²】   | 1663.88  |
| 最大压力【kgf】   | 2192.50  |
| ● 平足期 90%   |          |
| 时长【ms】      | 1244.00  |
| 平均速度【mm/ms】 | 0.15     |
| 最大面积【mm²】   | 13837.05 |
| 最大压力【kgf】   | 34948.58 |
| ● 蹬伸期 9%    |          |
| 时长【ms】      | 128.00   |
| 平均速度【mm/ms】 | 0.15     |
| 最大面积【mm²】   | 4012.65  |
| 最大压力【kgf】   | 6526.31  |

右脚

|             |          |
|-------------|----------|
| ● 着地期 2%    |          |
| 时长【ms】      | 30.00    |
| 平均速度【mm/ms】 | 0.28     |
| 最大面积【mm²】   | 2727.00  |
| 最大压力【kgf】   | 2650.32  |
| ● 平足期 81%   |          |
| 时长【ms】      | 1164.00  |
| 平均速度【mm/ms】 | 0.15     |
| 最大面积【mm²】   | 14781.15 |
| 最大压力【kgf】   | 38017.72 |
| ● 蹬伸期 18%   |          |
| 时长【ms】      | 280.00   |
| 平均速度【mm/ms】 | 0.24     |
| 最大面积【mm²】   | 5695.65  |
| 最大压力【kg/f】  | 11947.77 |

内外翻

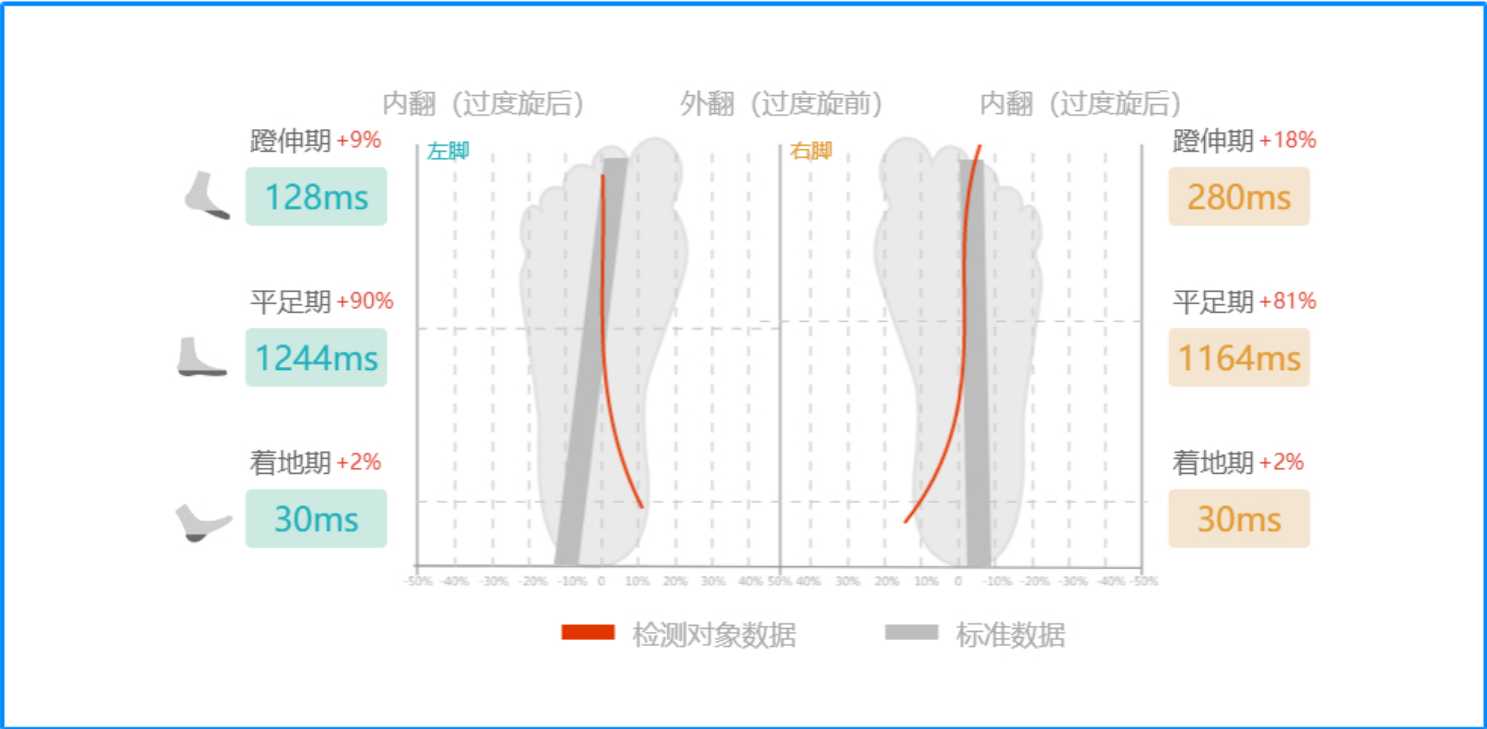

足弓类型

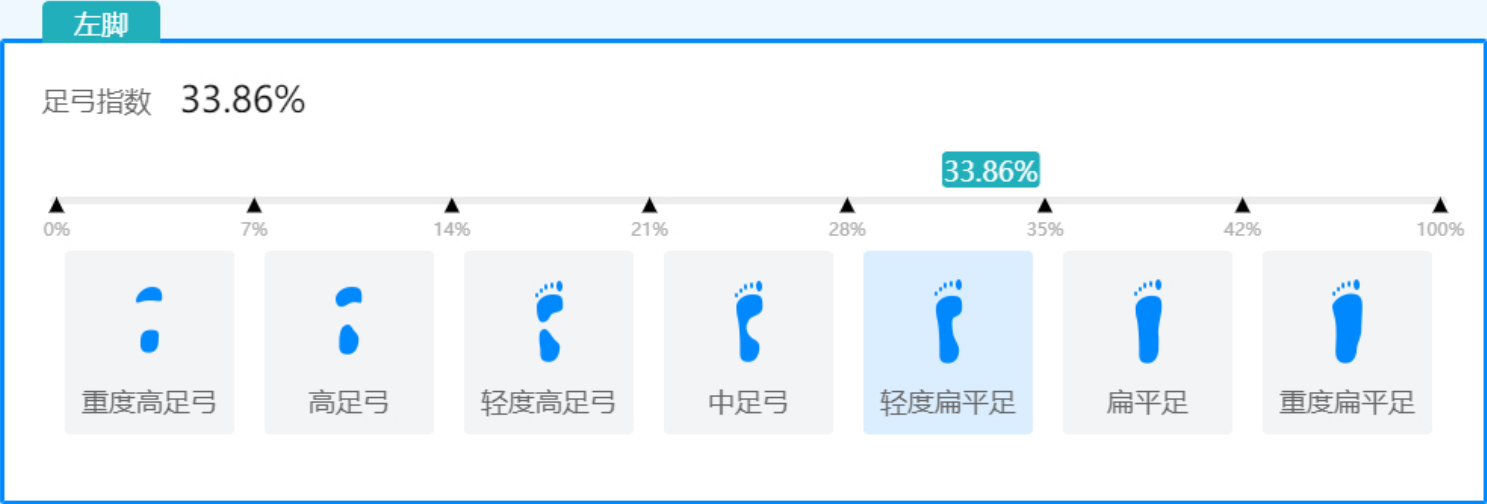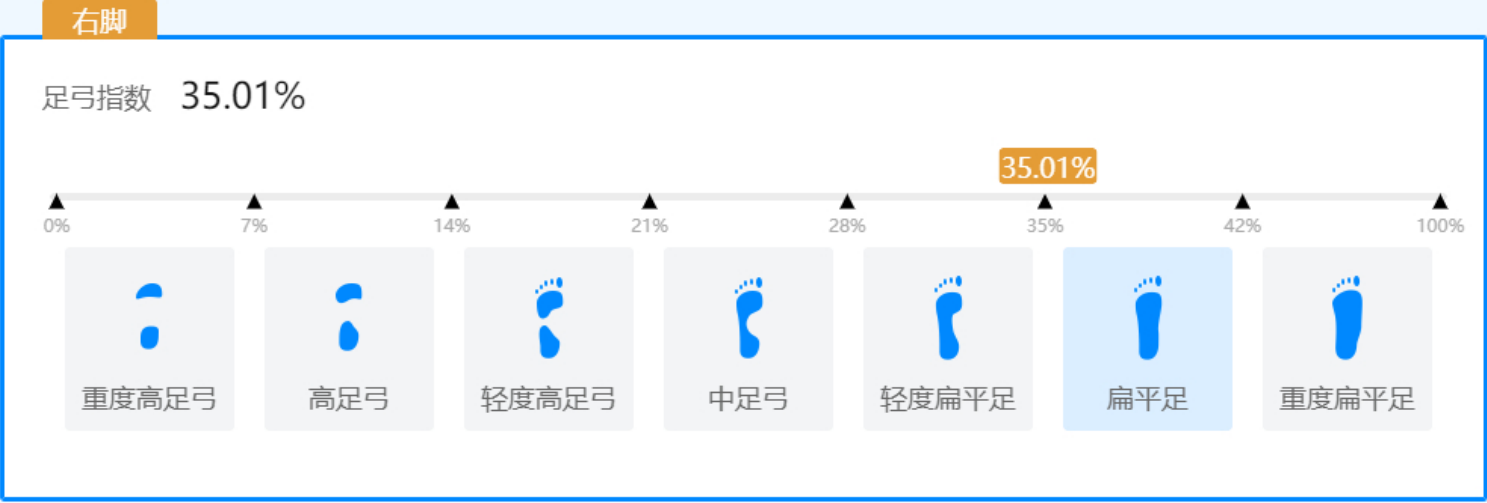

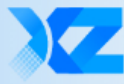

报告结论
