# Supplementary material for: Individualized Corrective Training Based on Precision Biomechanical Assessment for the Prevention of Sports Injuries in Adolescents
Source: Research Square preprint supplement (doi:10.21203/rs.3.rs-8426574/v1), 2026-02-02
Supplement: Supplementary file 8 [file 动态报告-张东琪-20250226103209.pdf › Plantar pressure and gait analysis/aerobics /动态报告-张东琪-20250226103209.pdf]

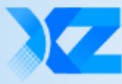

左右脚动态数据

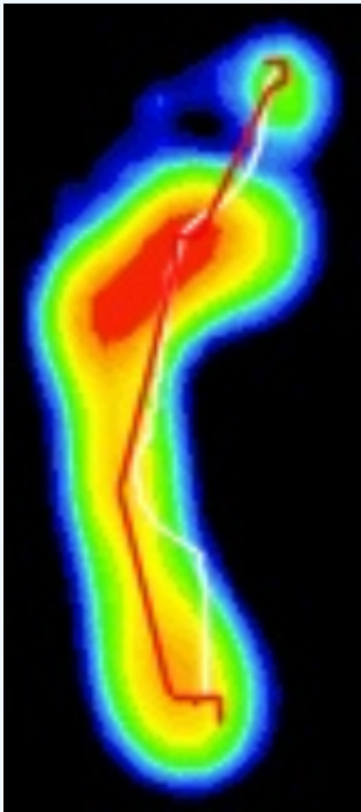

| 第1步      | Cop数据     | 第2步      |
|----------|-----------|----------|
| 209.14   | cop距离【mm】 | 183.06   |
| -6.23    | 步偏脚【°】    | 3.21     |
| 9377.86  | 面积【mm²】   | 11179.17 |
| 23449.07 | 压力【kgf】   | 25549.10 |
| 2.30     | 压强【gr/%】  | 2.09     |
| 34979.27 | 最大压力【kgf】 | 39764.74 |
| 0.17     | 速度【mm/ms】 | 0.19     |

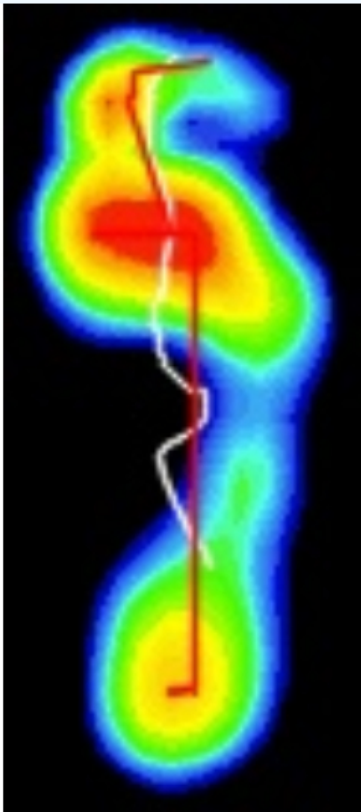

支撑相

左脚

|             |          |
|-------------|----------|
| ● 着地期 3%    |          |
| 时长【ms】      | 40.00    |
| 平均速度【mm/ms】 | 0.15     |
| 最大面积【mm²】   | 2338.50  |
| 最大压力【kgf】   | 3090.98  |
| ● 平足期 89%   |          |
| 时长【ms】      | 1120.00  |
| 平均速度【mm/ms】 | 0.15     |
| 最大面积【mm²】   | 12712.50 |
| 最大压力【kgf】   | 32362.76 |
| ● 蹬伸期 10%   |          |
| 时长【ms】      | 126.67   |
| 平均速度【mm/ms】 | 0.19     |
| 最大面积【mm²】   | 3904.88  |
| 最大压力【kgf】   | 6413.75  |

右脚

|             |          |
|-------------|----------|
| ● 着地期 4%    |          |
| 时长【ms】      | 45.00    |
| 平均速度【mm/ms】 | 0.03     |
| 最大面积【mm²】   | 1196.44  |
| 最大压力【kgf】   | 2222.52  |
| ● 平足期 91%   |          |
| 时长【ms】      | 1053.33  |
| 平均速度【mm/ms】 | 0.16     |
| 最大面积【mm²】   | 14642.25 |
| 最大压力【kgf】   | 35776.39 |
| ● 蹬伸期 7%    |          |
| 时长【ms】      | 80.00    |
| 平均速度【mm/ms】 | 0.27     |
| 最大面积【mm²】   | 4199.63  |
| 最大压力【kg/f】  | 5382.66  |

内外翻

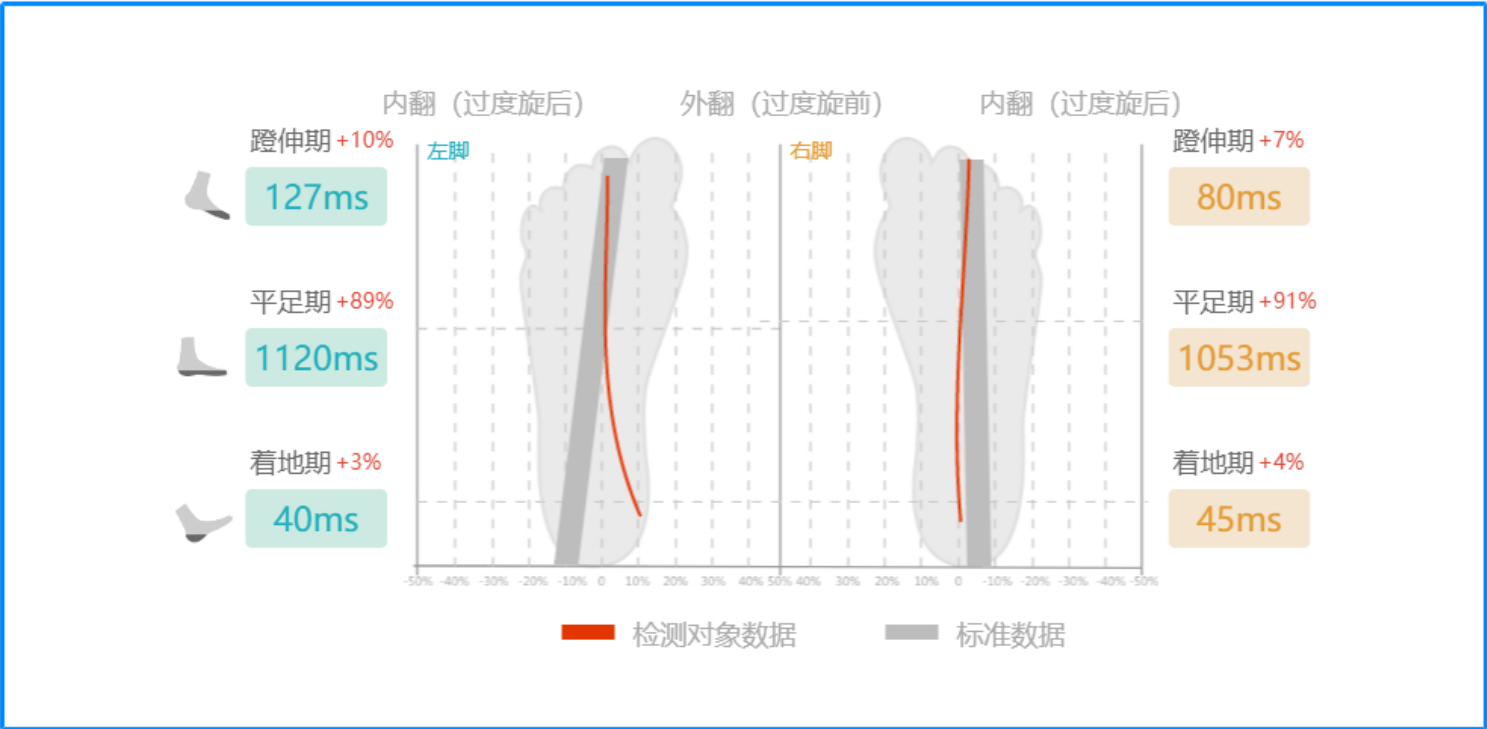

足弓类型

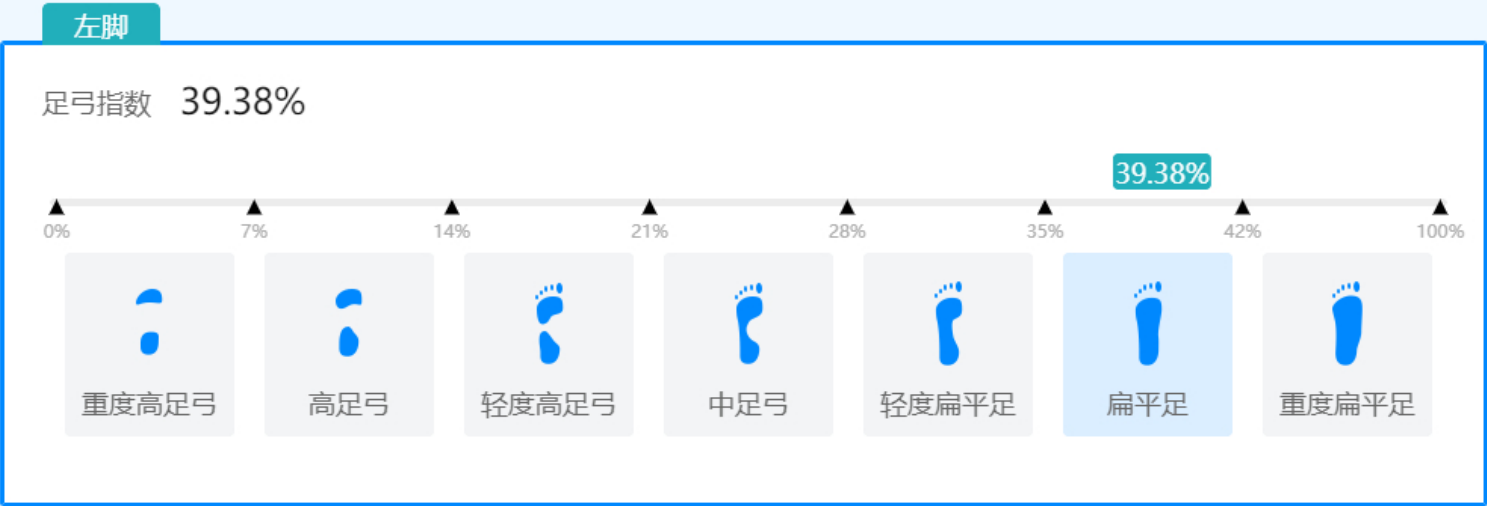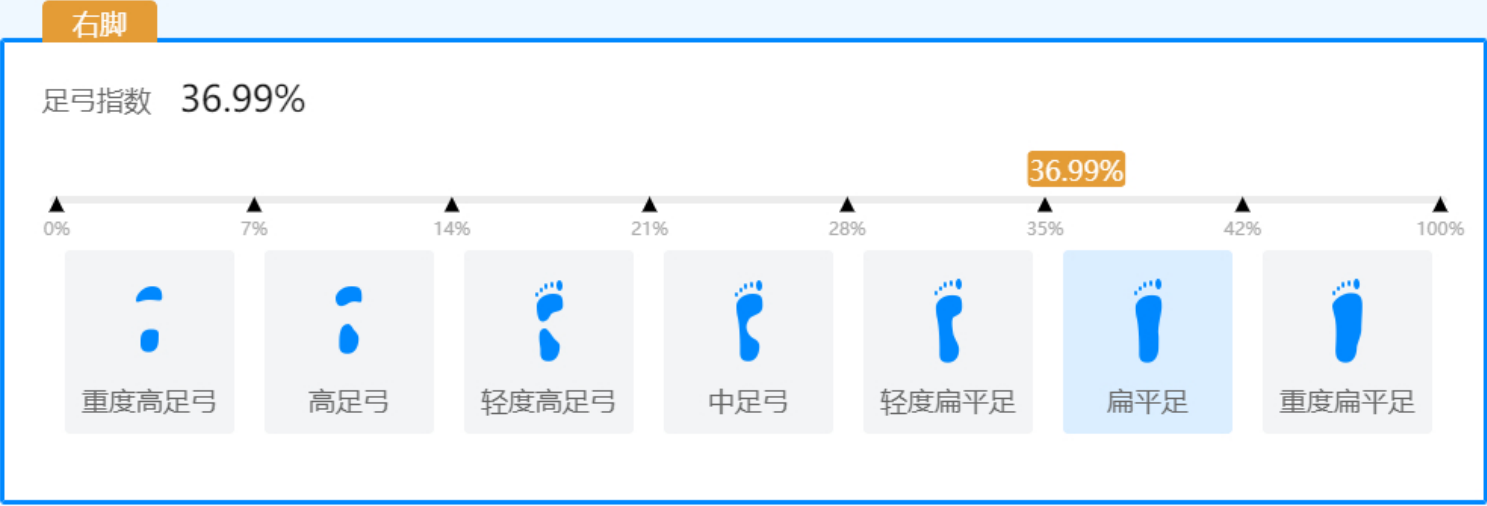

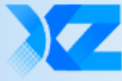

报告结论
