# Supplementary material for: Individualized Corrective Training Based on Precision Biomechanical Assessment for the Prevention of Sports Injuries in Adolescents
Source: Research Square preprint supplement (doi:10.21203/rs.3.rs-8426574/v1), 2026-02-02
Supplement: Supplementary file 9 [file 动态报告-智豪龙-20250226165149.pdf › Plantar pressure and gait analysis/aerobics /动态报告-智豪龙-20250226165149.pdf]

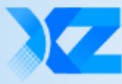

左右脚动态数据

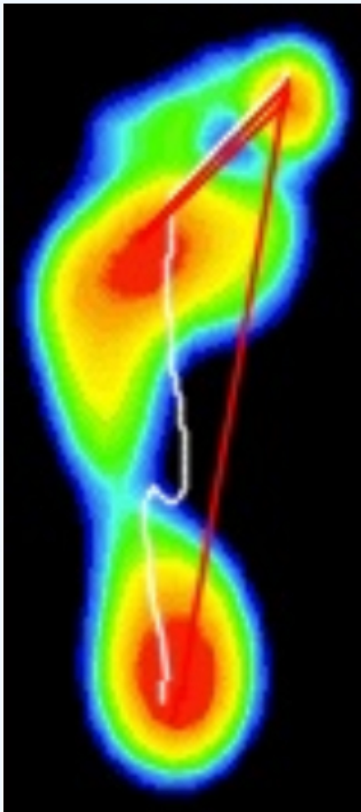

| 第1步      | Cop数据     | 第2步      |
|----------|-----------|----------|
| 226.05   | cop距离【mm】 | 237.46   |
| 10.70    | 步偏脚【°】    | 4.23     |
| 11196.36 | 面积【mm²】   | 11892.23 |
| 31707.11 | 压力【kgf】   | 34358.29 |
| 2.69     | 压强【gr/%】  | 2.59     |
| 47363.26 | 最大压力【kgf】 | 50899.01 |
| 0.18     | 速度【mm/ms】 | 0.15     |

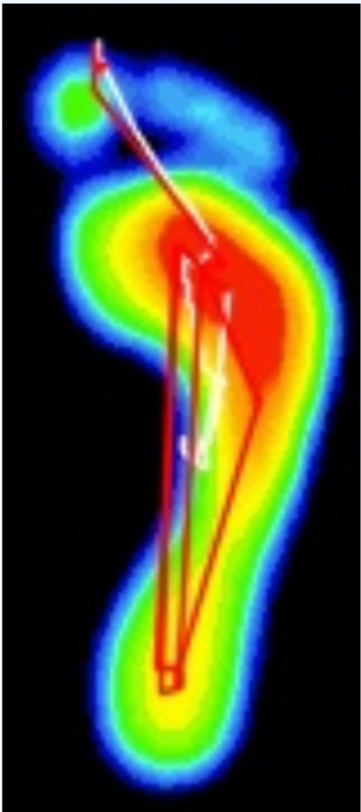

支撑相

左脚

|             |          |
|-------------|----------|
| ● 着地期 5%    |          |
| 时长【ms】      | 70.00    |
| 平均速度【mm/ms】 | 0.07     |
| 最大面积【mm²】   | 3120.19  |
| 最大压力【kgf】   | 7483.86  |
| ● 平足期 90%   |          |
| 时长【ms】      | 1160.00  |
| 平均速度【mm/ms】 | 0.14     |
| 最大面积【mm²】   | 15384.94 |
| 最大压力【kgf】   | 45782.21 |
| ● 蹬伸期 5%    |          |
| 时长【ms】      | 65.00    |
| 平均速度【mm/ms】 | 0.45     |
| 最大面积【mm²】   | 4258.13  |
| 最大压力【kgf】   | 5584.23  |

右脚

|             |          |
|-------------|----------|
| ● 着地期 4%    |          |
| 时长【ms】      | 60.00    |
| 平均速度【mm/ms】 | 0.08     |
| 最大面积【mm²】   | 3040.31  |
| 最大压力【kgf】   | 6194.46  |
| ● 平足期 86%   |          |
| 时长【ms】      | 1330.00  |
| 平均速度【mm/ms】 | 0.14     |
| 最大面积【mm²】   | 15757.31 |
| 最大压力【kgf】   | 46764.66 |
| ● 蹬伸期 11%   |          |
| 时长【ms】      | 165.00   |
| 平均速度【mm/ms】 | 0.19     |
| 最大面积【mm²】   | 3300.75  |
| 最大压力【kg/f】  | 4342.01  |

内外翻

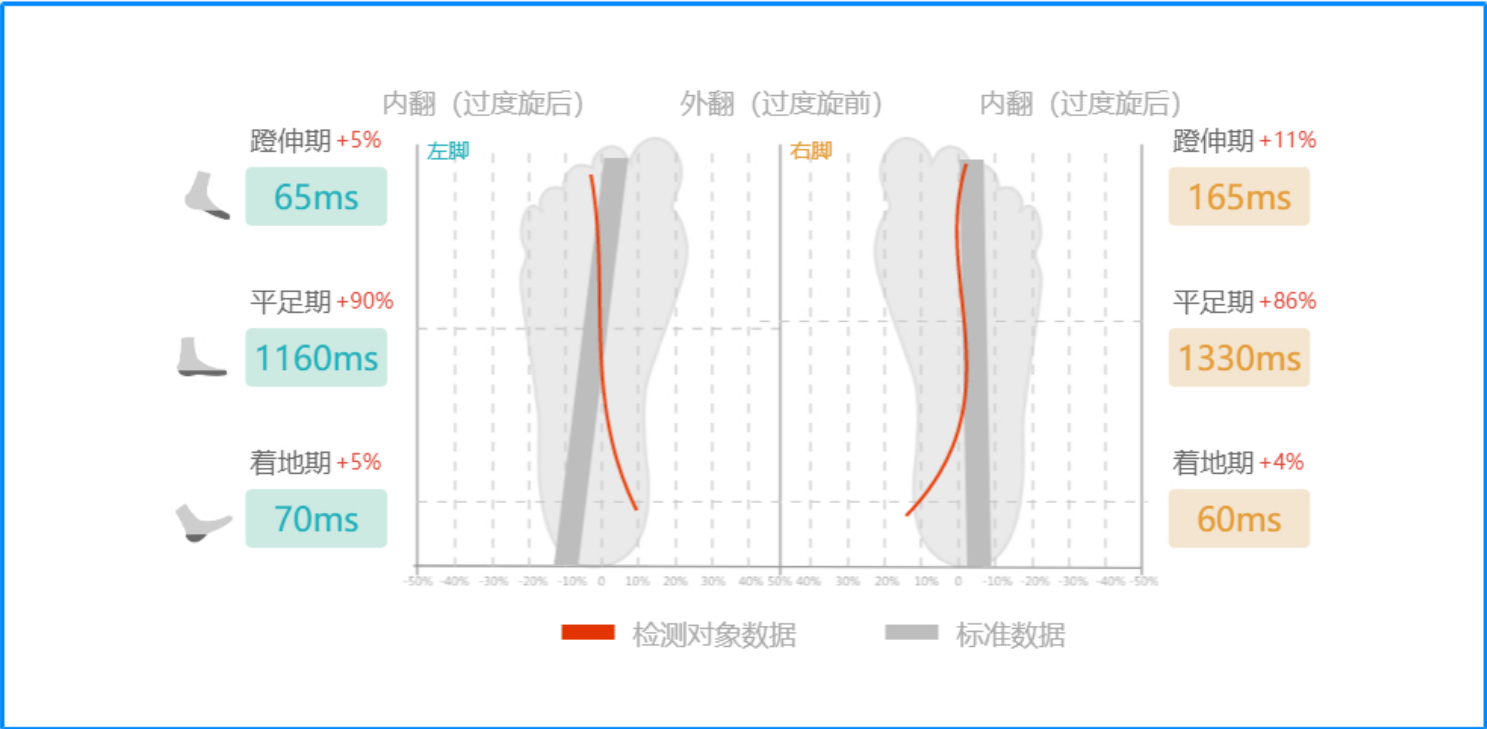

足弓类型

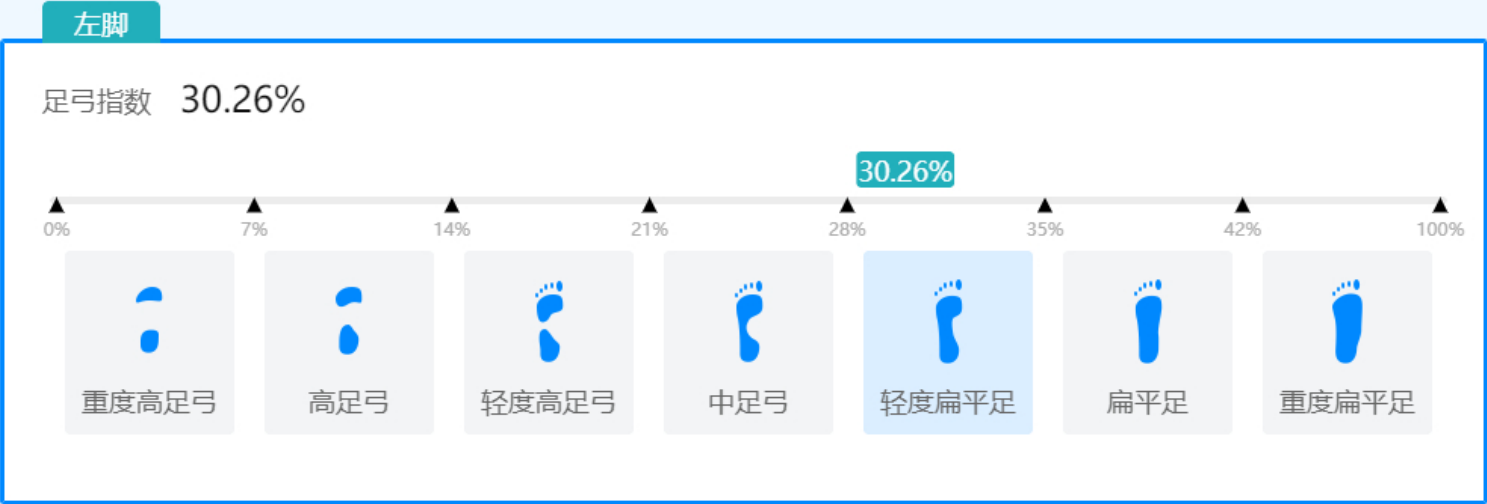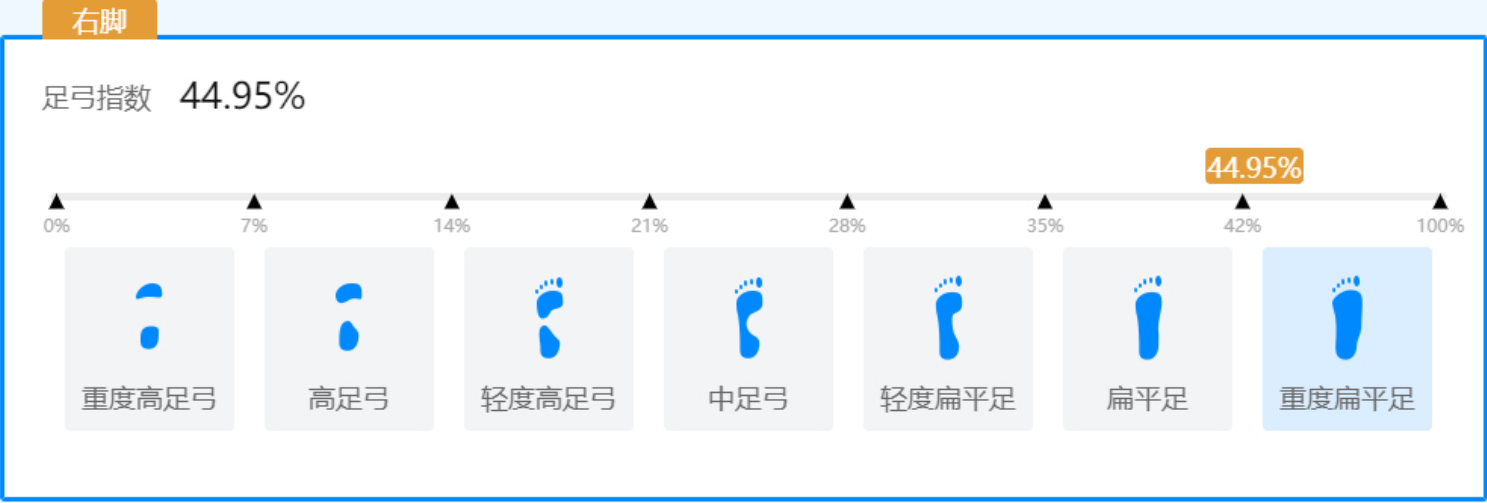

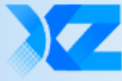

报告结论
