# Supplementary material for: Individualized Corrective Training Based on Precision Biomechanical Assessment for the Prevention of Sports Injuries in Adolescents
Source: Research Square preprint supplement (doi:10.21203/rs.3.rs-8426574/v1), 2026-02-02
Supplement: Supplementary file 10 [file 动态报告-朱梓齐-20250226100102.pdf › Plantar pressure and gait analysis/aerobics /动态报告-朱梓齐-20250226100102.pdf]

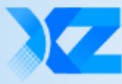

左右脚动态数据

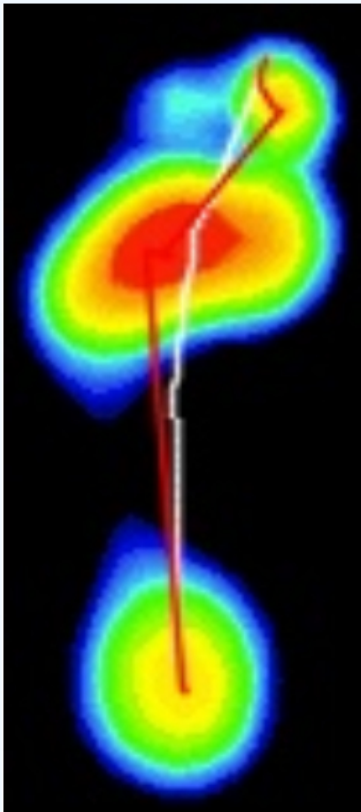

| 第2步      | Cop数据     | 第1步      |
|----------|-----------|----------|
| 198.04   | cop距离【mm】 | 210.49   |
| 9.19     | 步偏脚【°】    | 6.93     |
| 9210.11  | 面积【mm²】   | 6866.80  |
| 22978.76 | 压力【kgf】   | 16790.46 |
| 2.26     | 压强【gr/%】  | 2.01     |
| 34903.96 | 最大压力【kgf】 | 32152.97 |
| 0.20     | 速度【mm/ms】 | 0.14     |

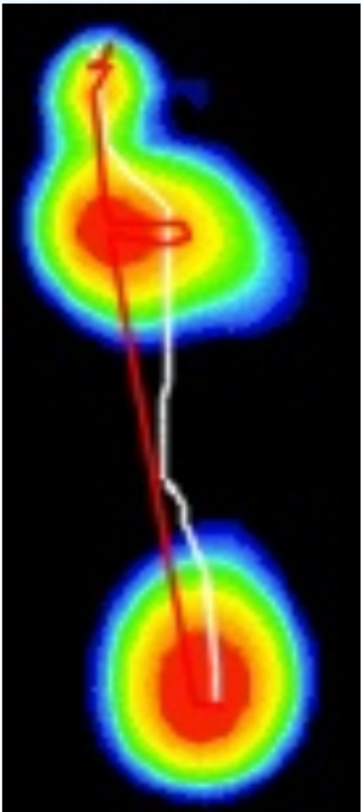

支撑相

左脚

|             |          |
|-------------|----------|
| ● 着地期 8%    |          |
| 时长【ms】      | 92.00    |
| 平均速度【mm/ms】 | 0.24     |
| 最大面积【mm²】   | 3967.65  |
| 最大压力【kgf】   | 8112.47  |
| ● 平足期 82%   |          |
| 时长【ms】      | 928.00   |
| 平均速度【mm/ms】 | 0.15     |
| 最大面积【mm²】   | 12205.80 |
| 最大压力【kgf】   | 32090.37 |
| ● 蹬伸期 10%   |          |
| 时长【ms】      | 112.00   |
| 平均速度【mm/ms】 | 0.38     |
| 最大面积【mm²】   | 5136.30  |
| 最大压力【kgf】   | 10021.96 |

右脚

|             |          |
|-------------|----------|
| ● 着地期 8%    |          |
| 时长【ms】      | 86.67    |
| 平均速度【mm/ms】 | 0.13     |
| 最大面积【mm²】   | 3577.50  |
| 最大压力【kgf】   | 7173.82  |
| ● 平足期 78%   |          |
| 时长【ms】      | 866.67   |
| 平均速度【mm/ms】 | 0.16     |
| 最大面积【mm²】   | 13782.00 |
| 最大压力【kgf】   | 35514.71 |
| ● 蹬伸期 14%   |          |
| 时长【ms】      | 170.00   |
| 平均速度【mm/ms】 | 0.35     |
| 最大面积【mm²】   | 5559.75  |
| 最大压力【kgf】   | 13275.52 |

## 内外翻

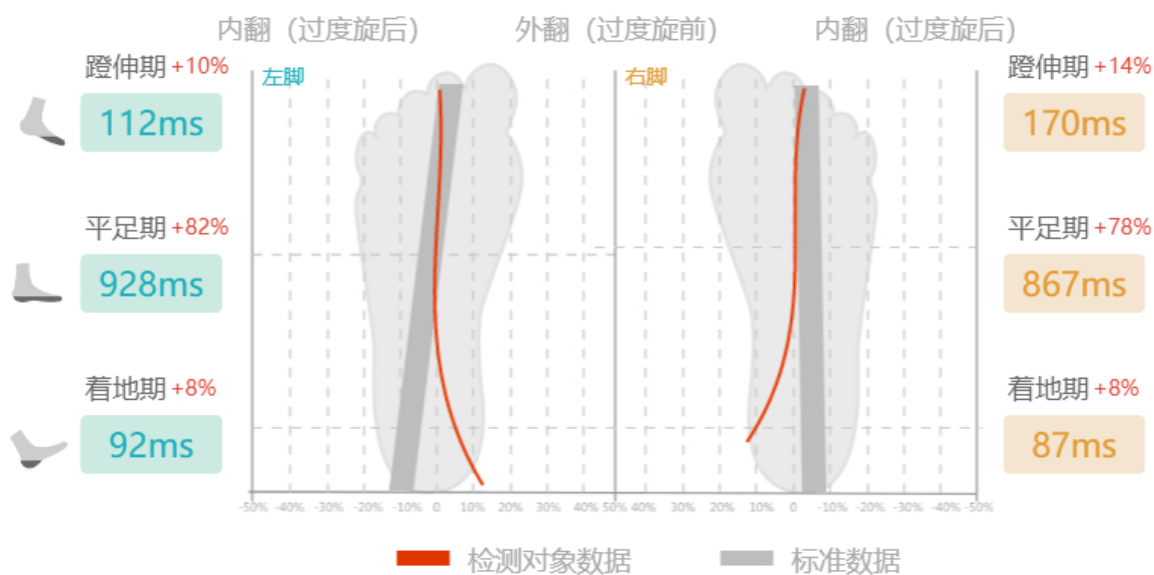

## 足弓类型

### 左脚

足弓指数 32.48%

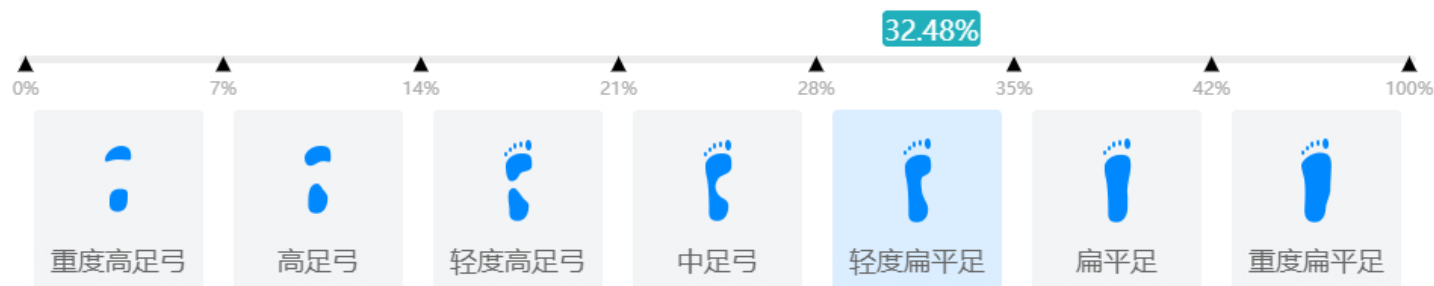

### 右脚

足弓指数 21.03%

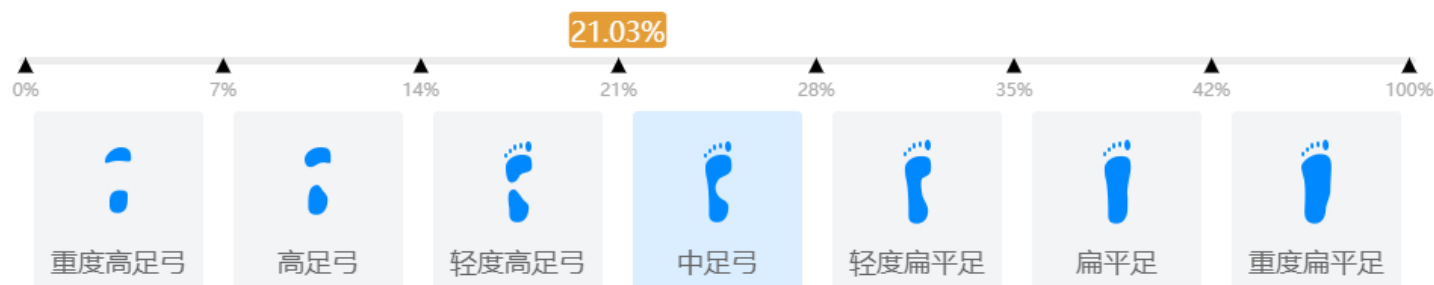

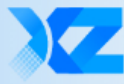

报告结论
