# Supplementary material for: Individualized Corrective Training Based on Precision Biomechanical Assessment for the Prevention of Sports Injuries in Adolescents
Source: Research Square preprint supplement (doi:10.21203/rs.3.rs-8426574/v1), 2026-02-02

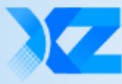

左右脚动态数据

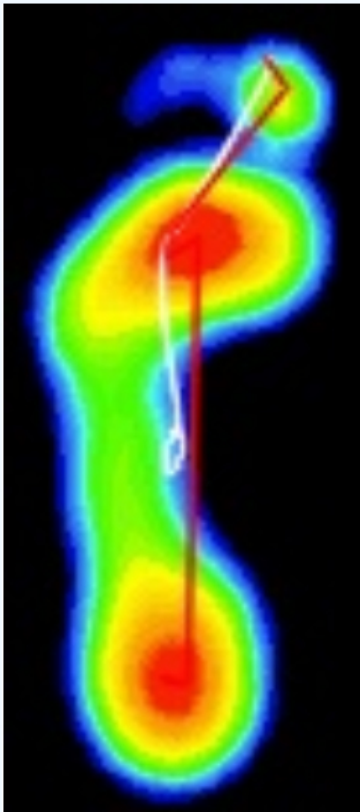

| 第1步      | Cop数据     | 第2步      |
|----------|-----------|----------|
| 152.19   | cop距离【mm】 | 235.14   |
| 11.89    | 步偏脚【°】    | 7.27     |
| 11446.48 | 面积【mm²】   | 10619.25 |
| 28212.91 | 压力【kgf】   | 25778.39 |
| 2.24     | 压强【gr/%】  | 2.18     |
| 38054.72 | 最大压力【kgf】 | 38260.41 |
| 0.25     | 速度【mm/ms】 | 0.23     |

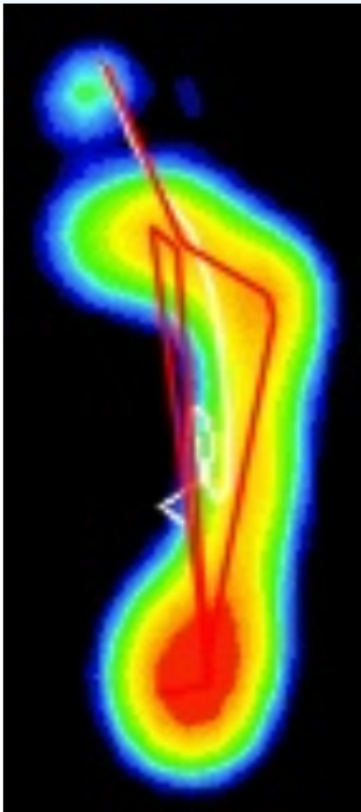

支撑相

左脚

|             |          |
|-------------|----------|
| ● 着地期 4%    |          |
| 时长【ms】      | 44.00    |
| 平均速度【mm/ms】 | 0.14     |
| 最大面积【mm²】   | 2735.55  |
| 最大压力【kgf】   | 3730.53  |
| ● 平足期 87%   |          |
| 时长【ms】      | 902.86   |
| 平均速度【mm/ms】 | 0.16     |
| 最大面积【mm²】   | 13731.43 |
| 最大压力【kgf】   | 37611.74 |
| ● 蹬伸期 10%   |          |
| 时长【ms】      | 100.00   |
| 平均速度【mm/ms】 | 0.50     |
| 最大面积【mm²】   | 4080.21  |
| 最大压力【kgf】   | 7321.83  |

右脚

|             |          |
|-------------|----------|
| ● 着地期 3%    |          |
| 时长【ms】      | 40.00    |
| 平均速度【mm/ms】 | 0.59     |
| 最大面积【mm²】   | 2842.13  |
| 最大压力【kgf】   | 2238.01  |
| ● 平足期 88%   |          |
| 时长【ms】      | 1140.00  |
| 平均速度【mm/ms】 | 0.14     |
| 最大面积【mm²】   | 14130.38 |
| 最大压力【kgf】   | 38795.64 |
| ● 蹬伸期 9%    |          |
| 时长【ms】      | 116.67   |
| 平均速度【mm/ms】 | 0.38     |
| 最大面积【mm²】   | 4525.50  |
| 最大压力【kgf】   | 6571.32  |

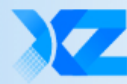

内外翻

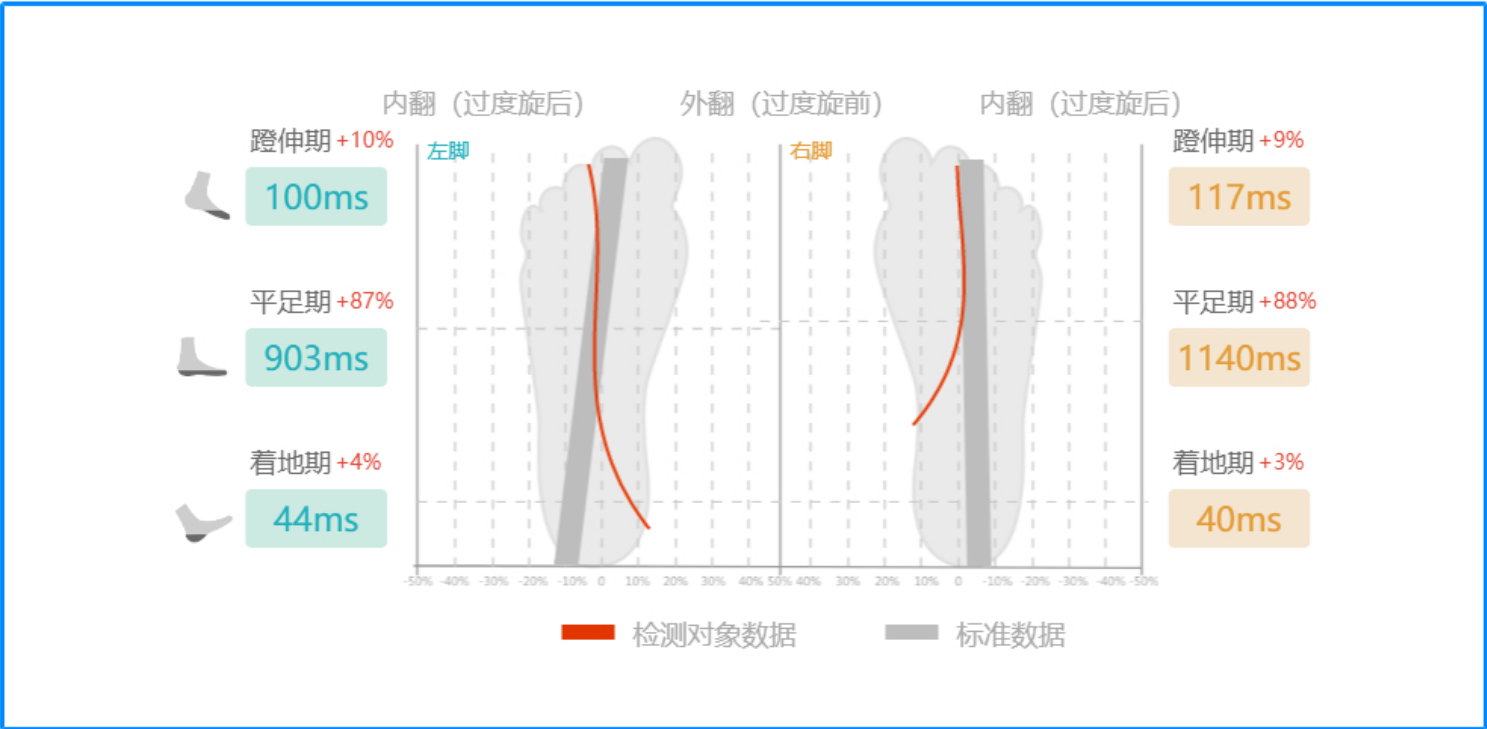

足弓类型

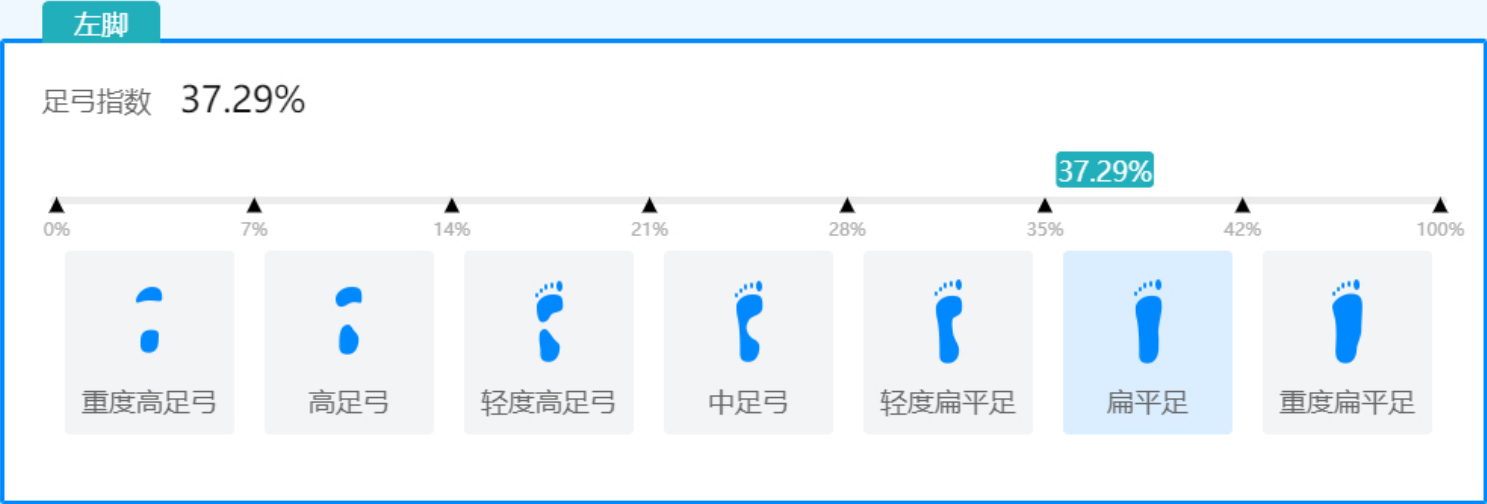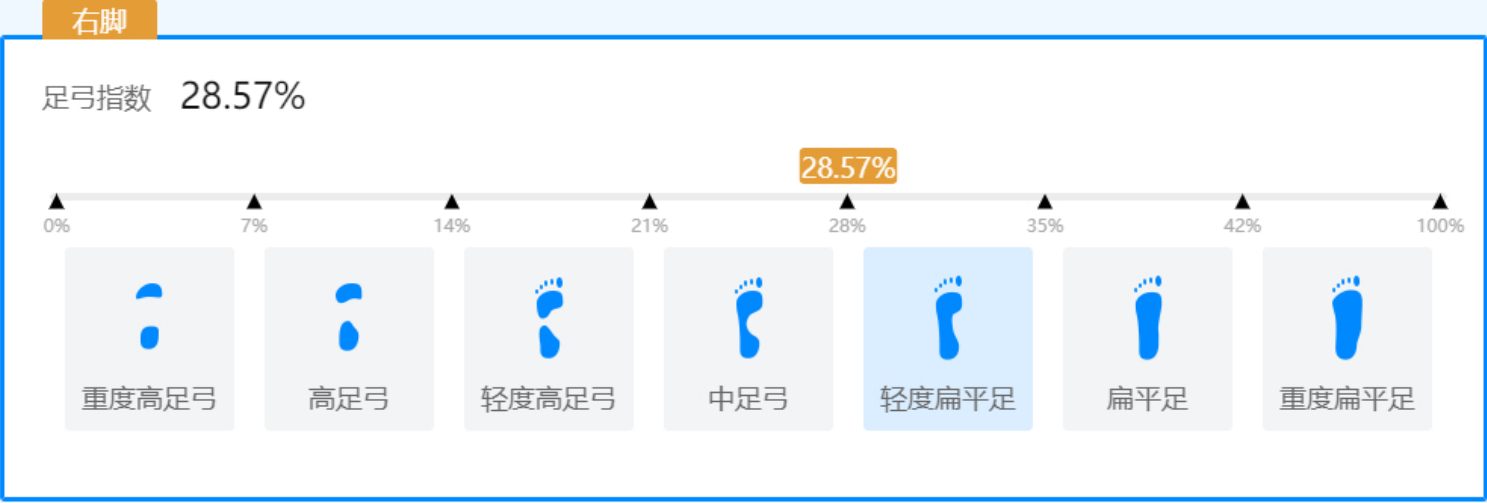

Supplement: Supplementary file 11 [file 动态报告-段瑶-20250226164651.pdf › Plantar pressure and gait analysis/aerobics /动态报告-段瑶-20250226164651.pdf]
