# Supplementary material for: Individualized Corrective Training Based on Precision Biomechanical Assessment for the Prevention of Sports Injuries in Adolescents
Source: Research Square preprint supplement (doi:10.21203/rs.3.rs-8426574/v1), 2026-02-02
Supplement: Supplementary file 12 [file 动态报告-温欢-20250226165037.pdf › Plantar pressure and gait analysis/aerobics /动态报告-温欢-20250226165037.pdf]

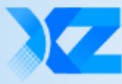

左右脚动态数据

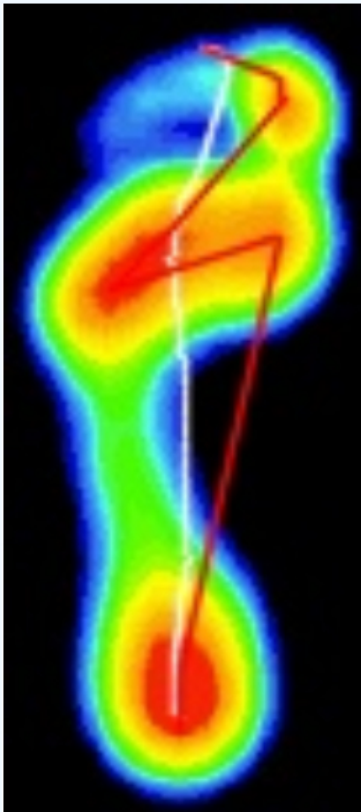

| 第1步      | Cop数据     | 第2步      |
|----------|-----------|----------|
| 206.62   | cop距离【mm】 | 206.99   |
| 1.68     | 步偏脚【°】    | -1.11    |
| 9032.24  | 面积【mm²】   | 8099.81  |
| 20608.00 | 压力【kgf】   | 18213.56 |
| 2.07     | 压强【gr/%】  | 2.10     |
| 33974.23 | 最大压力【kgf】 | 30598.71 |
| 0.17     | 速度【mm/ms】 | 0.17     |

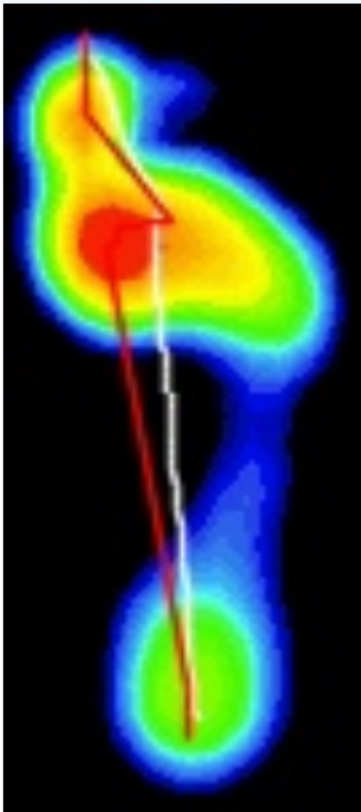

支撑相

左脚

|             |          |
|-------------|----------|
| ● 着地期 7%    |          |
| 时长【ms】      | 105.00   |
| 平均速度【mm/ms】 | 0.07     |
| 最大面积【mm²】   | 2845.69  |
| 最大压力【kgf】   | 5958.13  |
| ● 平足期 84%   |          |
| 时长【ms】      | 1144.00  |
| 平均速度【mm/ms】 | 0.14     |
| 最大面积【mm²】   | 13887.90 |
| 最大压力【kgf】   | 32528.43 |
| ● 蹬伸期 10%   |          |
| 时长【ms】      | 148.00   |
| 平均速度【mm/ms】 | 0.26     |
| 最大面积【mm²】   | 5336.55  |
| 最大压力【kgf】   | 10026.86 |

右脚

|             |          |
|-------------|----------|
| ● 着地期 9%    |          |
| 时长【ms】      | 120.00   |
| 平均速度【mm/ms】 | 0.11     |
| 最大面积【mm²】   | 3989.25  |
| 最大压力【kgf】   | 7539.38  |
| ● 平足期 82%   |          |
| 时长【ms】      | 1105.00  |
| 平均速度【mm/ms】 | 0.13     |
| 最大面积【mm²】   | 13522.50 |
| 最大压力【kgf】   | 31658.65 |
| ● 蹬伸期 9%    |          |
| 时长【ms】      | 120.00   |
| 平均速度【mm/ms】 | 0.31     |
| 最大面积【mm²】   | 4836.94  |
| 最大压力【kg/f】  | 6810.45  |



内外翻

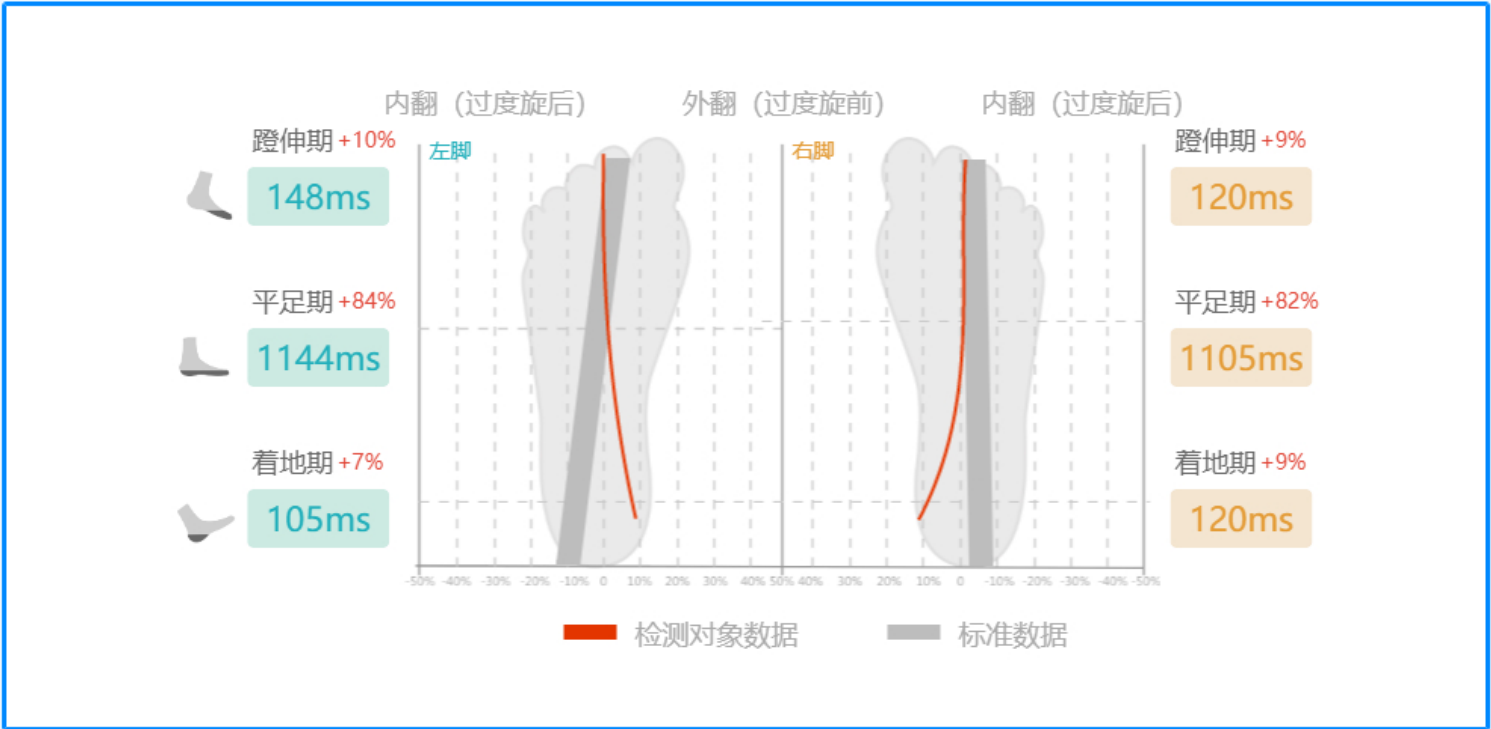

足弓类型

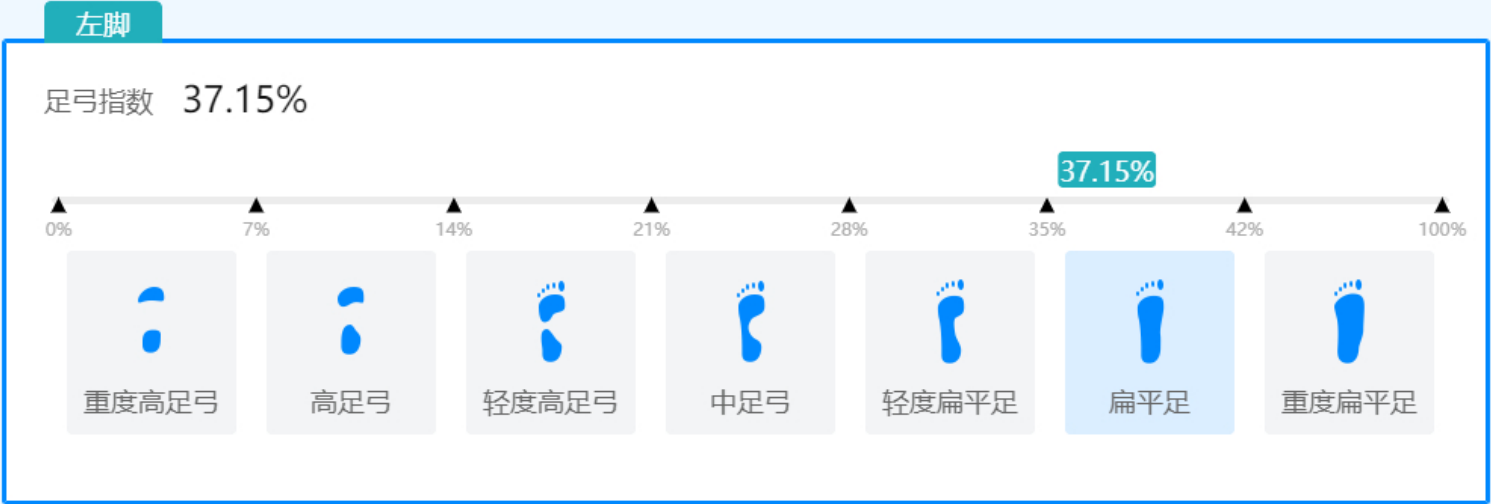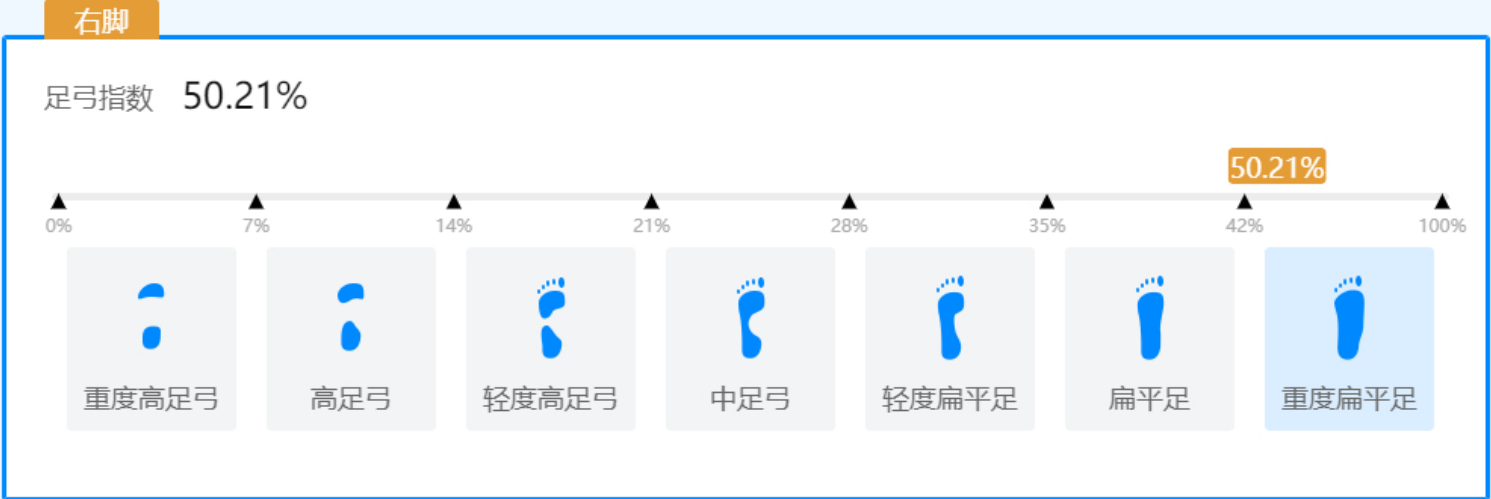

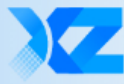

报告结论
