# Supplementary material for: Individualized Corrective Training Based on Precision Biomechanical Assessment for the Prevention of Sports Injuries in Adolescents
Source: Research Square preprint supplement (doi:10.21203/rs.3.rs-8426574/v1), 2026-02-02
Supplement: Supplementary file 13 [file 动态报告-王军艳-20250226165301.pdf › Plantar pressure and gait analysis/aerobics /动态报告-王军艳-20250226165301.pdf]

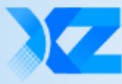

左右脚动态数据

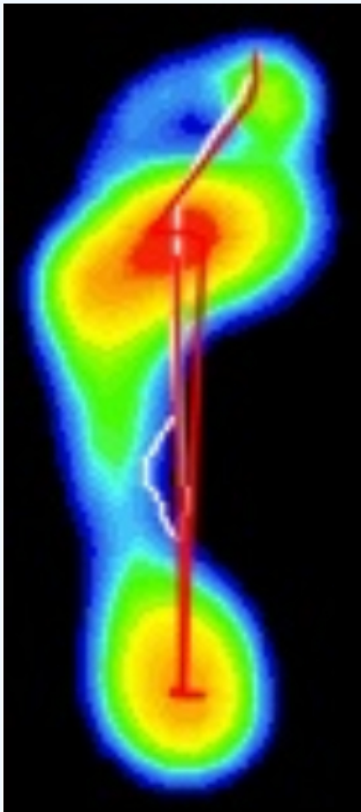

| 第1步      | Cop数据     | 第2步      |
|----------|-----------|----------|
| 240.20   | cop距离【mm】 | 188.87   |
| 6.58     | 步偏脚【°】    | 6.78     |
| 8991.68  | 面积【mm²】   | 8089.62  |
| 22687.25 | 压力【kgf】   | 20723.18 |
| 2.25     | 压强【gr/%】  | 2.36     |
| 37761.31 | 最大压力【kgf】 | 30757.00 |
| 0.19     | 速度【mm/ms】 | 0.17     |

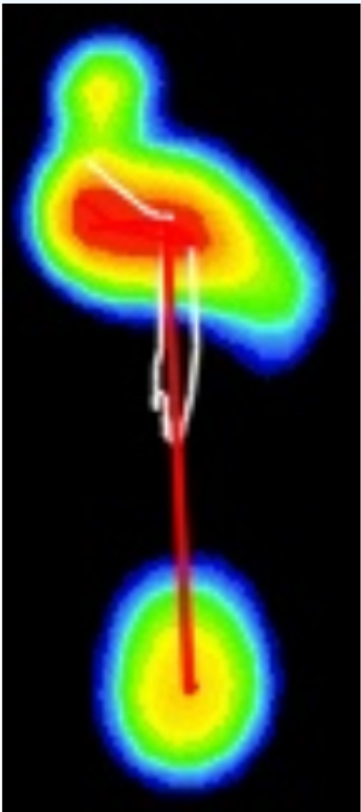

支撑相

左脚

|             |          |
|-------------|----------|
| ● 着地期 2%    |          |
| 时长【ms】      | 28.00    |
| 平均速度【mm/ms】 | 0.00     |
| 最大面积【mm²】   | 728.55   |
| 最大压力【kgf】   | 547.28   |
| ● 平足期 89%   |          |
| 时长【ms】      | 1083.33  |
| 平均速度【mm/ms】 | 0.16     |
| 最大面积【mm²】   | 12882.38 |
| 最大压力【kgf】   | 34766.21 |
| ● 蹬伸期 10%   |          |
| 时长【ms】      | 116.67   |
| 平均速度【mm/ms】 | 0.19     |
| 最大面积【mm²】   | 3561.38  |
| 最大压力【kgf】   | 5293.94  |

右脚

|             |          |
|-------------|----------|
| ● 着地期 4%    |          |
| 时长【ms】      | 60.00    |
| 平均速度【mm/ms】 | 0.22     |
| 最大面积【mm²】   | 2552.63  |
| 最大压力【kgf】   | 3320.61  |
| ● 平足期 85%   |          |
| 时长【ms】      | 1050.00  |
| 平均速度【mm/ms】 | 0.14     |
| 最大面积【mm²】   | 12825.38 |
| 最大压力【kgf】   | 33944.05 |
| ● 蹬伸期 11%   |          |
| 时长【ms】      | 136.67   |
| 平均速度【mm/ms】 | 0.23     |
| 最大面积【mm²】   | 3264.75  |
| 最大压力【kgf】   | 6217.49  |

内外翻

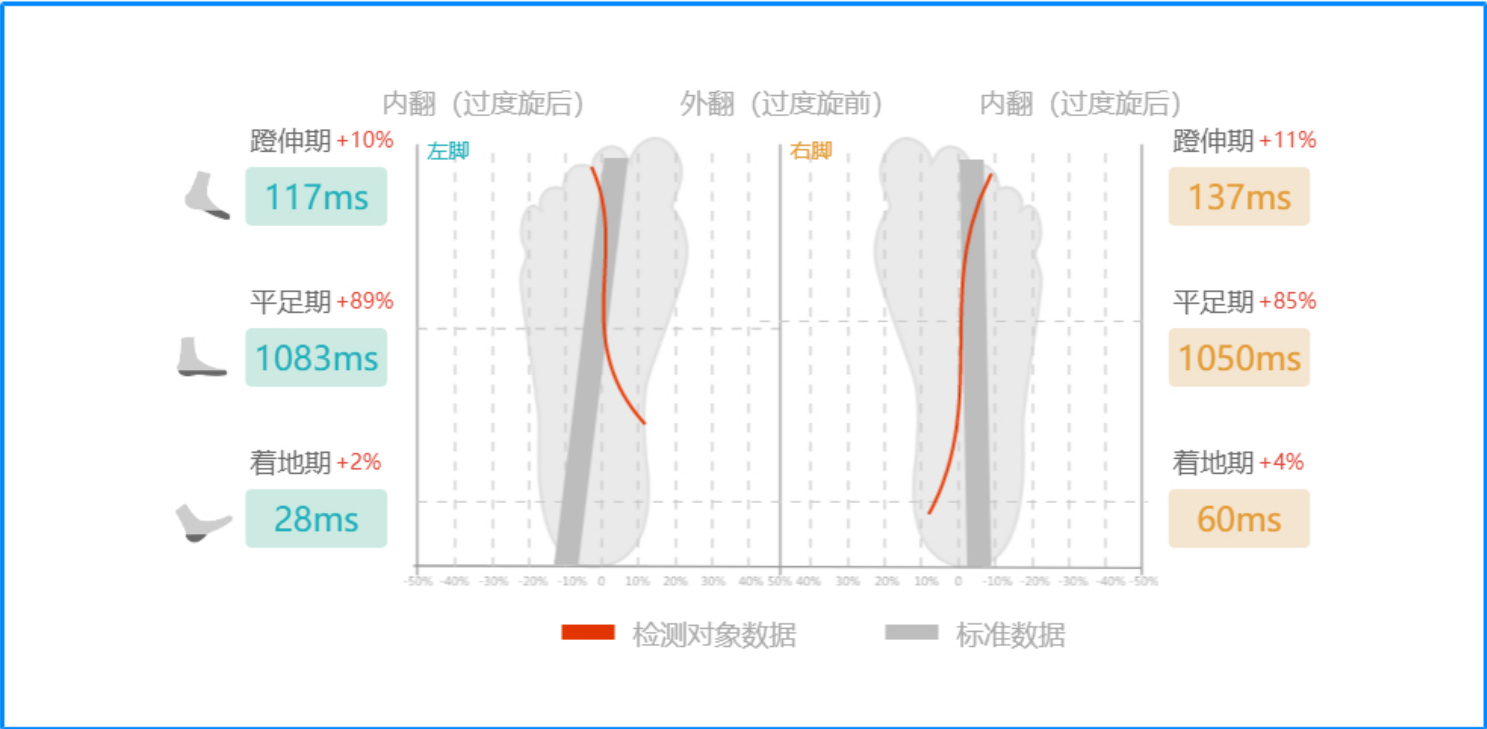

足弓类型

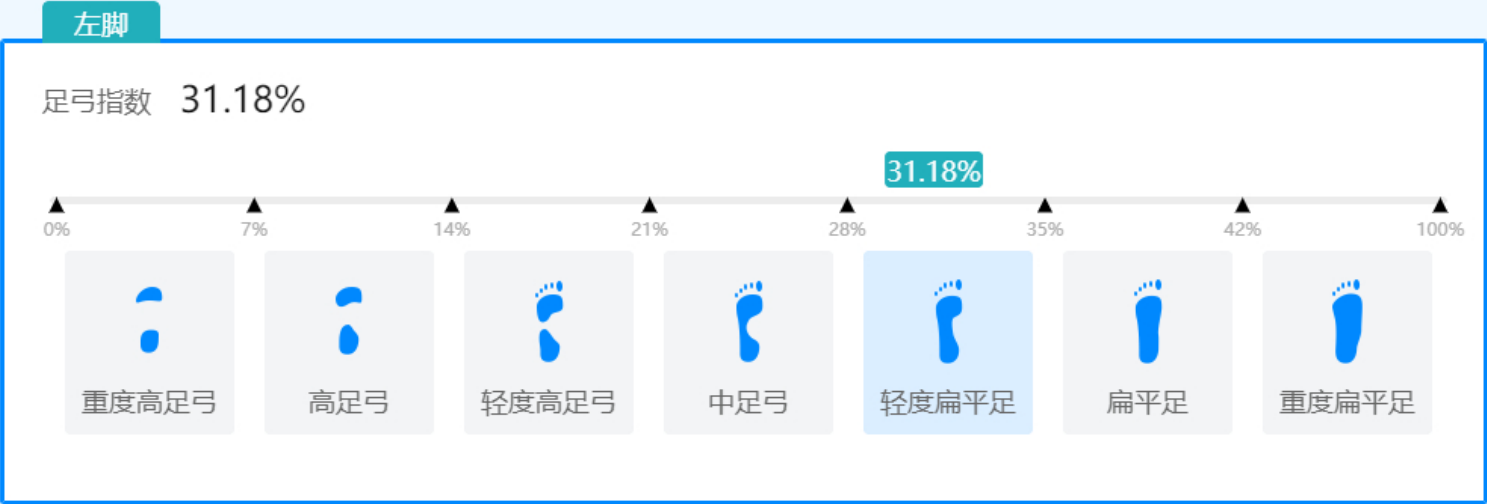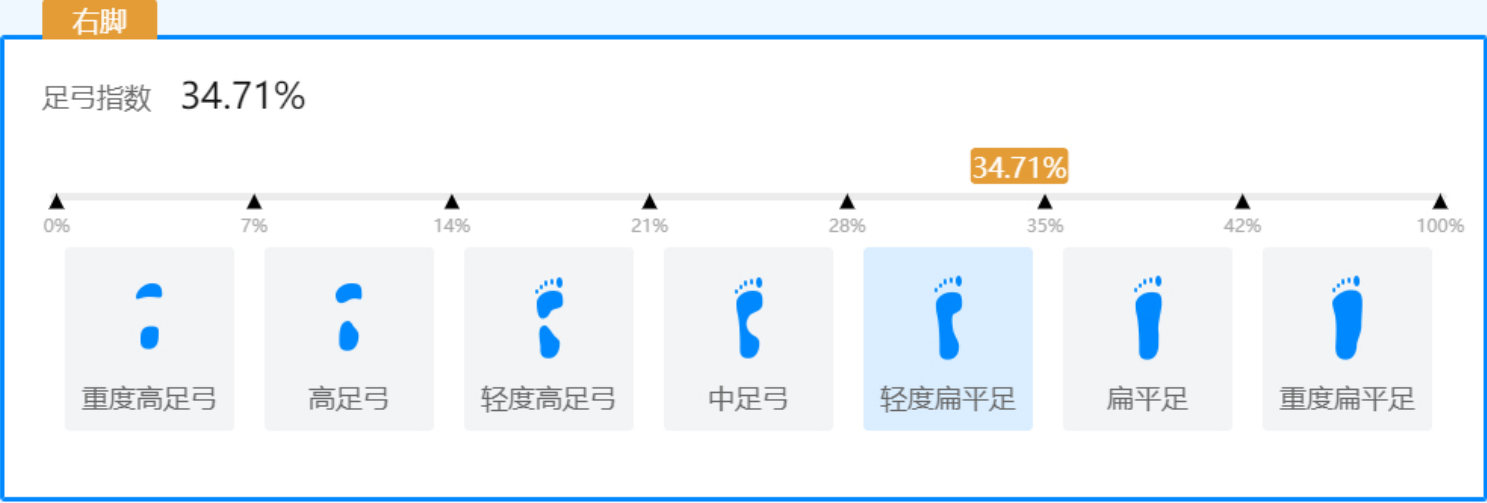

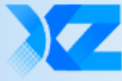

报告结论
