# Supplementary material for: Individualized Corrective Training Based on Precision Biomechanical Assessment for the Prevention of Sports Injuries in Adolescents
Source: Research Square preprint supplement (doi:10.21203/rs.3.rs-8426574/v1), 2026-02-02
Supplement: Supplementary file 14 [file 动态报告-王思奕-20250226101256.pdf › Plantar pressure and gait analysis/aerobics /动态报告-王思奕-20250226101256.pdf]

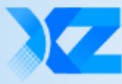

左右脚动态数据

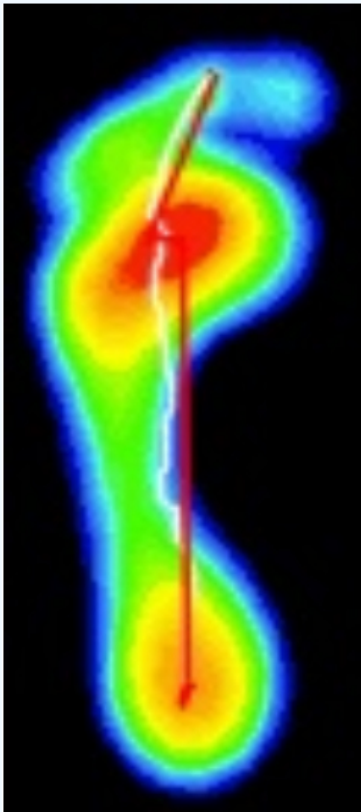

| 第4步      | Cop数据     | 第1步      |
|----------|-----------|----------|
| 185.38   | cop距离【mm】 | 203.25   |
| 10.30    | 步偏脚【°】    | 10.20    |
| 8529.66  | 面积【mm²】   | 7798.23  |
| 20257.40 | 压力【kgf】   | 18395.31 |
| 2.21     | 压强【gr/%】  | 2.15     |
| 31290.15 | 最大压力【kgf】 | 31176.61 |
| 0.18     | 速度【mm/ms】 | 0.18     |

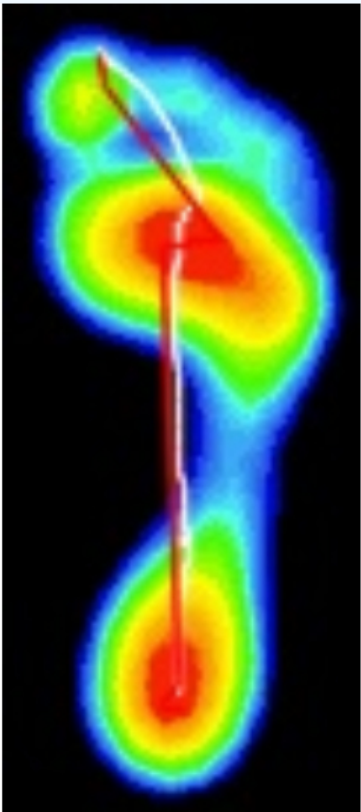

支撑相

左脚

|             |          |
|-------------|----------|
| ● 着地期 6%    |          |
| 时长【ms】      | 60.00    |
| 平均速度【mm/ms】 | 0.10     |
| 最大面积【mm²】   | 3392.25  |
| 最大压力【kgf】   | 5190.91  |
| ● 平足期 87%   |          |
| 时长【ms】      | 893.33   |
| 平均速度【mm/ms】 | 0.14     |
| 最大面积【mm²】   | 12780.75 |
| 最大压力【kgf】   | 30937.74 |
| ● 蹬伸期 7%    |          |
| 时长【ms】      | 73.33    |
| 平均速度【mm/ms】 | 0.28     |
| 最大面积【mm²】   | 4020.75  |
| 最大压力【kgf】   | 4801.73  |

右脚

|             |          |
|-------------|----------|
| ● 着地期 4%    |          |
| 时长【ms】      | 40.00    |
| 平均速度【mm/ms】 | 0.08     |
| 最大面积【mm²】   | 2138.63  |
| 最大压力【kgf】   | 2735.96  |
| ● 平足期 87%   |          |
| 时长【ms】      | 905.71   |
| 平均速度【mm/ms】 | 0.16     |
| 最大面积【mm²】   | 12403.29 |
| 最大压力【kgf】   | 30339.76 |
| ● 蹬伸期 9%    |          |
| 时长【ms】      | 97.14    |
| 平均速度【mm/ms】 | 0.32     |
| 最大面积【mm²】   | 4000.82  |
| 最大压力【kg/f】  | 5906.06  |

## 内外翻

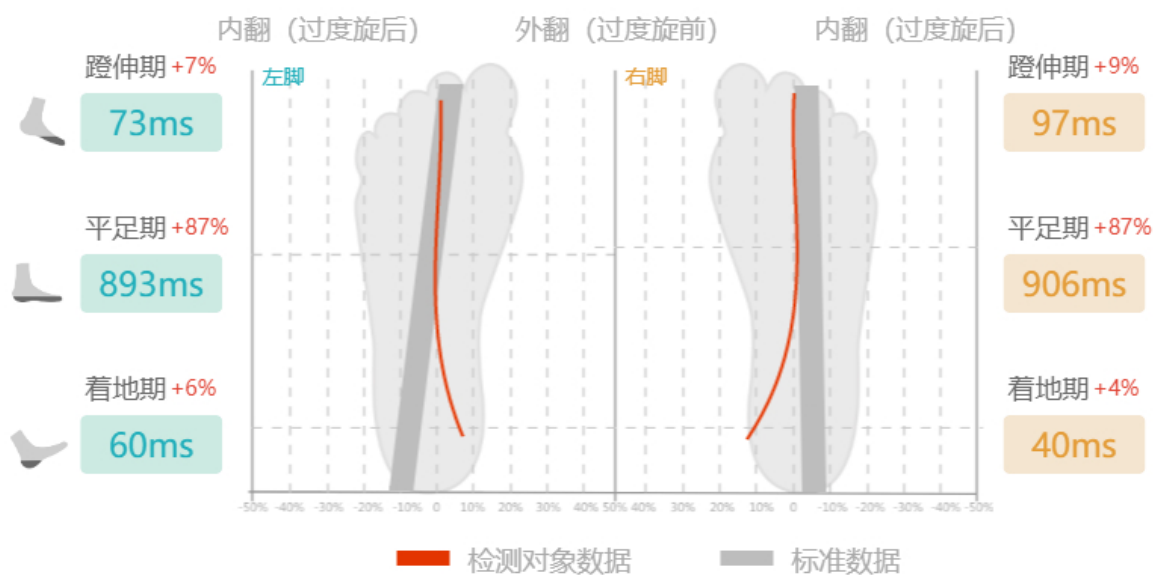

## 足弓类型

### 左脚

足弓指数 31.66%

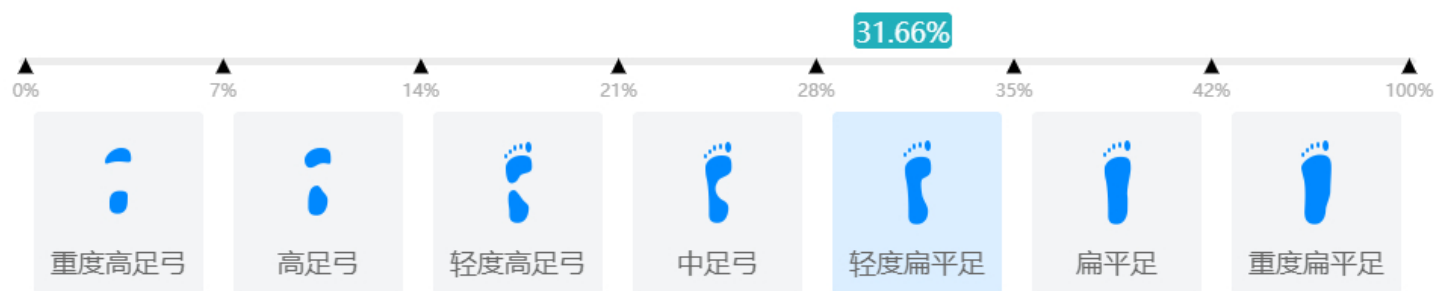

### 右脚

足弓指数 33.11%

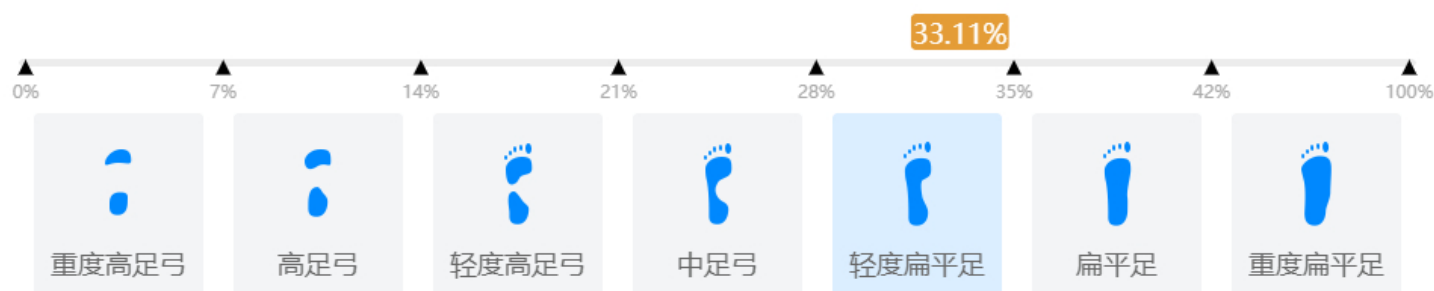

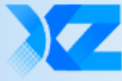

报告结论
