# Supplementary material for: Individualized Corrective Training Based on Precision Biomechanical Assessment for the Prevention of Sports Injuries in Adolescents
Source: Research Square preprint supplement (doi:10.21203/rs.3.rs-8426574/v1), 2026-02-02
Supplement: Supplementary file 15 [file 动态报告-王雅楠-20250226164927.pdf › Plantar pressure and gait analysis/aerobics /动态报告-王雅楠-20250226164927.pdf]

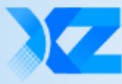

左右脚动态数据

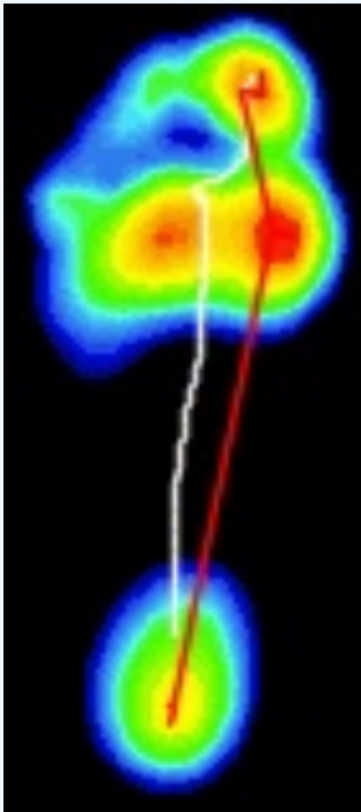

| 第1步      | Cop数据     | 第2步      |
|----------|-----------|----------|
| 194.40   | cop距离【mm】 | 213.39   |
| 8.42     | 步偏脚【°】    | 5.69     |
| 8240.40  | 面积【mm²】   | 8387.52  |
| 18712.28 | 压力【kgf】   | 19596.76 |
| 2.14     | 压强【gr/%】  | 2.16     |
| 31220.66 | 最大压力【kgf】 | 35036.96 |
| 0.19     | 速度【mm/ms】 | 0.19     |

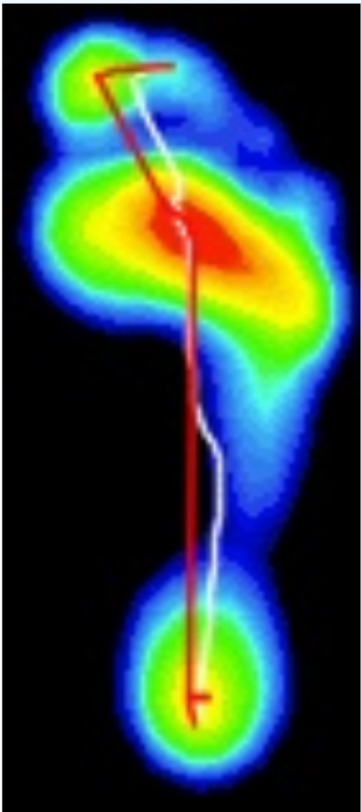

支撑相

左脚

|             |          |
|-------------|----------|
| ● 着地期 13%   |          |
| 时长【ms】      | 152.00   |
| 平均速度【mm/ms】 | 0.26     |
| 最大面积【mm²】   | 5814.90  |
| 最大压力【kgf】   | 11234.76 |
| ● 平足期 62%   |          |
| 时长【ms】      | 712.00   |
| 平均速度【mm/ms】 | 0.15     |
| 最大面积【mm²】   | 13770.90 |
| 最大压力【kgf】   | 34238.52 |
| ● 蹬伸期 25%   |          |
| 时长【ms】      | 280.00   |
| 平均速度【mm/ms】 | 0.18     |
| 最大面积【mm²】   | 7796.25  |
| 最大压力【kgf】   | 19485.81 |

右脚

|             |          |
|-------------|----------|
| ● 着地期 16%   |          |
| 时长【ms】      | 190.00   |
| 平均速度【mm/ms】 | 0.13     |
| 最大面积【mm²】   | 4297.50  |
| 最大压力【kgf】   | 8836.08  |
| ● 平足期 66%   |          |
| 时长【ms】      | 785.00   |
| 平均速度【mm/ms】 | 0.17     |
| 最大面积【mm²】   | 14352.19 |
| 最大压力【kgf】   | 33926.54 |
| ● 蹬伸期 18%   |          |
| 时长【ms】      | 220.00   |
| 平均速度【mm/ms】 | 0.23     |
| 最大面积【mm²】   | 6745.50  |
| 最大压力【kg/f】  | 15866.17 |

内外翻

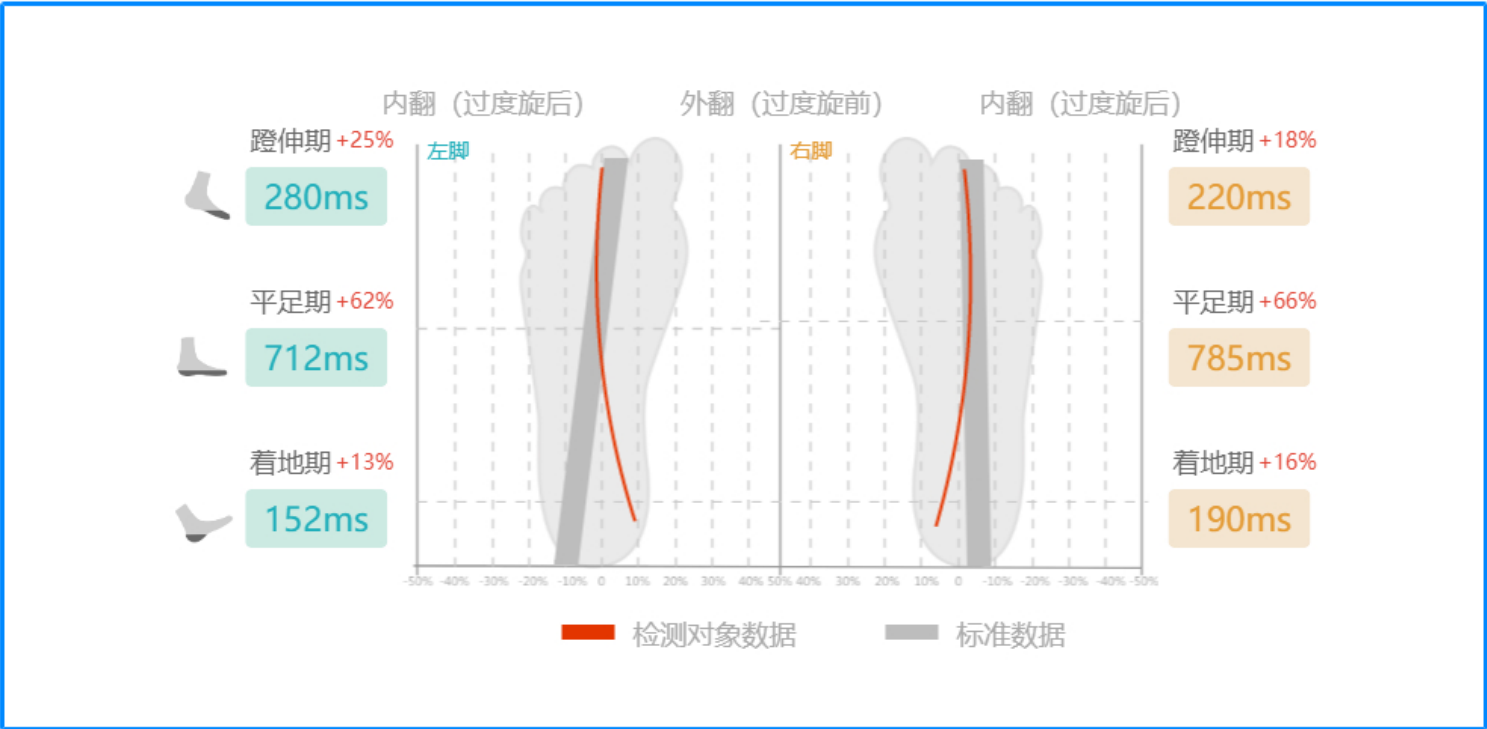

足弓类型

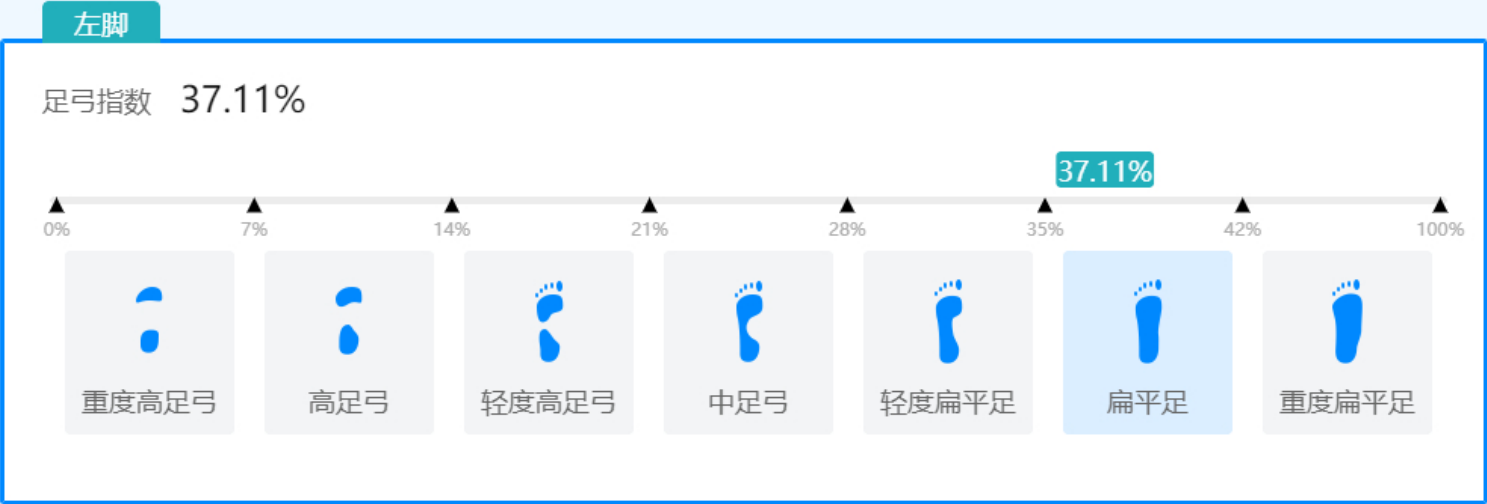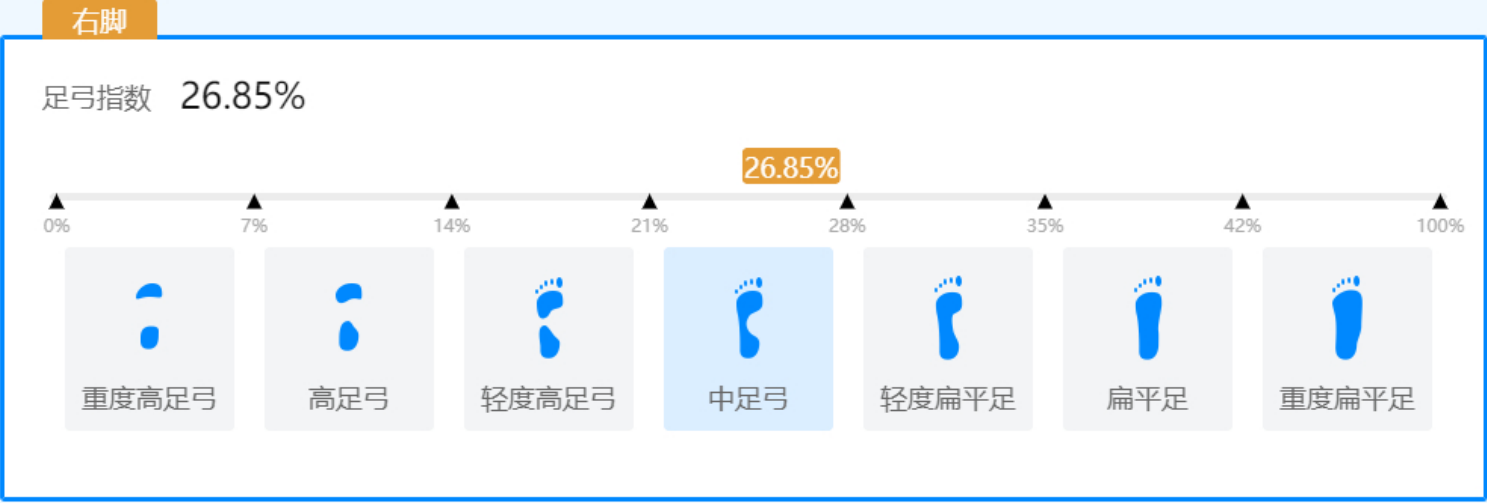

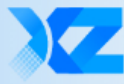

报告结论
