# Supplementary material for: Individualized Corrective Training Based on Precision Biomechanical Assessment for the Prevention of Sports Injuries in Adolescents
Source: Research Square preprint supplement (doi:10.21203/rs.3.rs-8426574/v1), 2026-02-02
Supplement: Supplementary file 16 [file 动态报告-秦甜甜-20250226150036.pdf › Plantar pressure and gait analysis/aerobics /动态报告-秦甜甜-20250226150036.pdf]

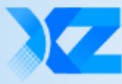

左右脚动态数据

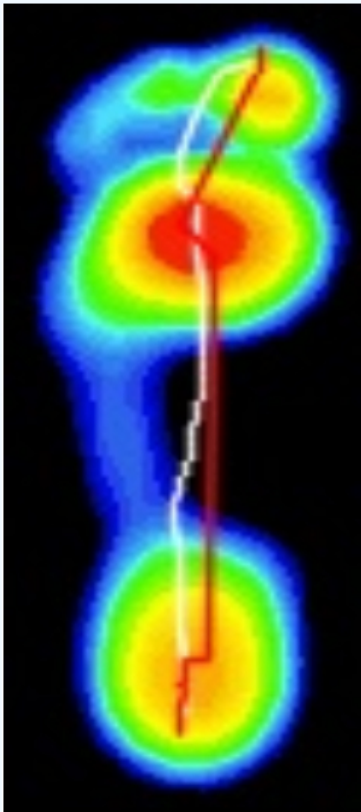

| 第2步      | Cop数据     | 第1步      |
|----------|-----------|----------|
| 206.49   | cop距离【mm】 | 206.02   |
| 3.73     | 步偏脚【°】    | 3.67     |
| 9143.30  | 面积【mm²】   | 10269.04 |
| 21876.33 | 压力【kgf】   | 24566.56 |
| 2.26     | 压强【gr/%】  | 2.24     |
| 33249.82 | 最大压力【kgf】 | 35869.73 |
| 0.22     | 速度【mm/ms】 | 0.19     |

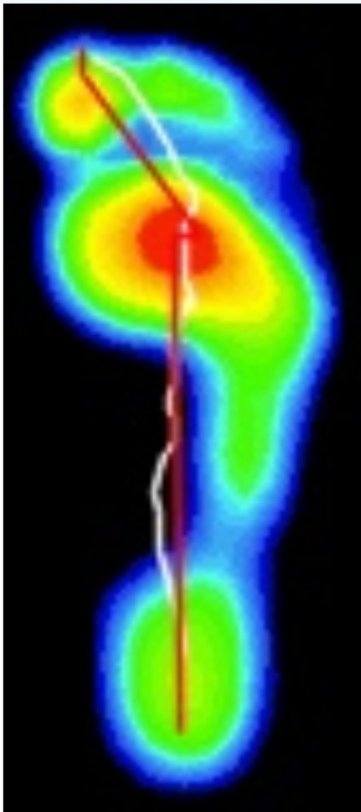

支撑相

左脚

|             |          |
|-------------|----------|
| ● 着地期 14%   |          |
| 时长【ms】      | 124.00   |
| 平均速度【mm/ms】 | 0.11     |
| 最大面积【mm²】   | 3700.35  |
| 最大压力【kgf】   | 8697.86  |
| ● 平足期 79%   |          |
| 时长【ms】      | 760.00   |
| 平均速度【mm/ms】 | 0.18     |
| 最大面积【mm²】   | 13439.70 |
| 最大压力【kgf】   | 34443.62 |
| ● 蹬伸期 9%    |          |
| 时长【ms】      | 95.00    |
| 平均速度【mm/ms】 | 0.31     |
| 最大面积【mm²】   | 5268.94  |
| 最大压力【kgf】   | 9041.19  |

右脚

|             |          |
|-------------|----------|
| ● 着地期 8%    |          |
| 时长【ms】      | 84.00    |
| 平均速度【mm/ms】 | 0.07     |
| 最大面积【mm²】   | 3298.95  |
| 最大压力【kgf】   | 7785.18  |
| ● 平足期 83%   |          |
| 时长【ms】      | 916.00   |
| 平均速度【mm/ms】 | 0.17     |
| 最大面积【mm²】   | 13558.05 |
| 最大压力【kgf】   | 35309.84 |
| ● 蹬伸期 9%    |          |
| 时长【ms】      | 100.00   |
| 平均速度【mm/ms】 | 0.36     |
| 最大面积【mm²】   | 5358.15  |
| 最大压力【kg/f】  | 9704.68  |

内外翻

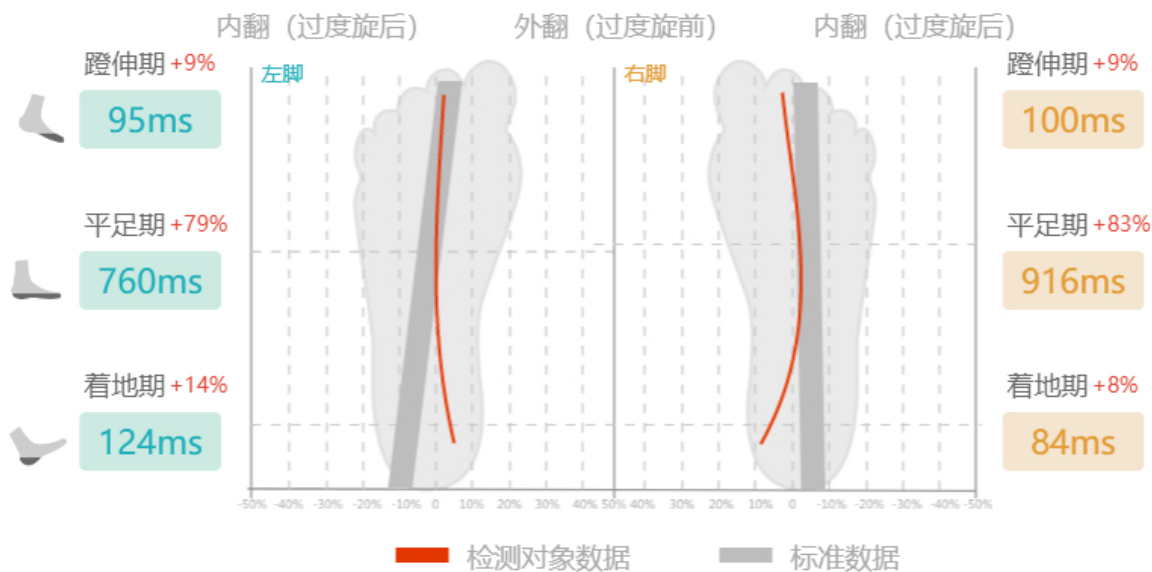

足弓类型

左脚

足弓指数 34.29%

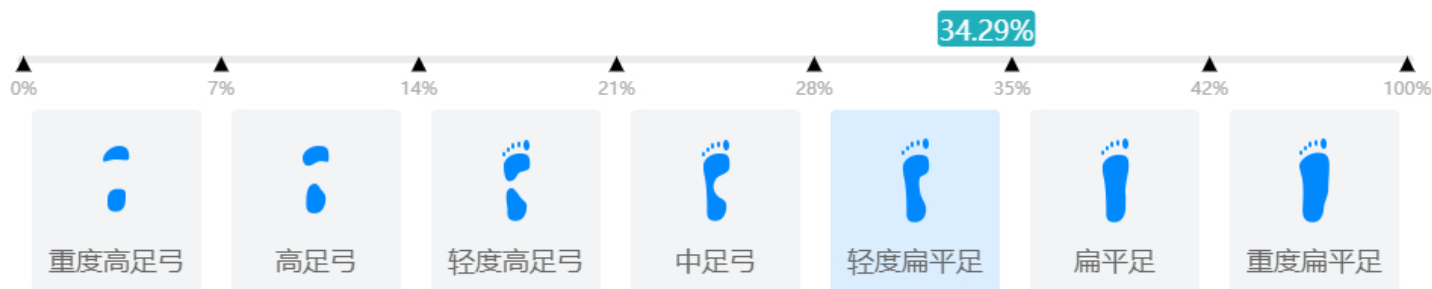

右脚

足弓指数 38.78%

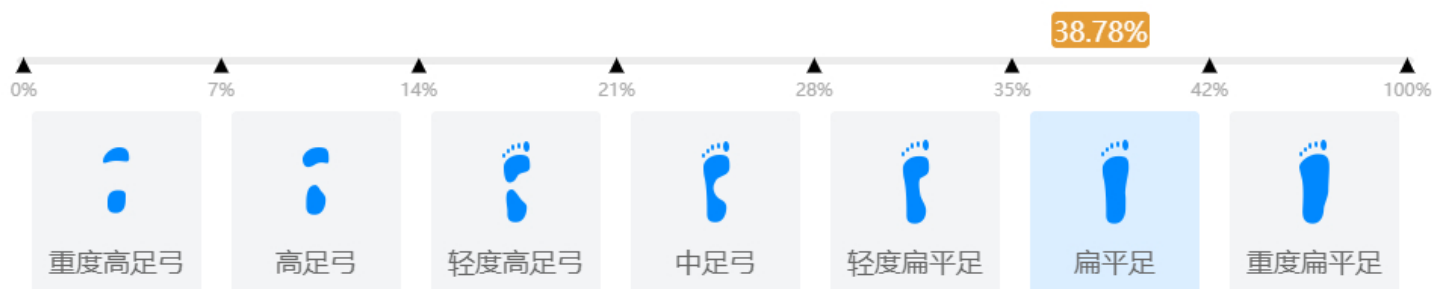

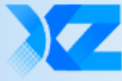

报告结论
