# Supplementary material for: Individualized Corrective Training Based on Precision Biomechanical Assessment for the Prevention of Sports Injuries in Adolescents
Source: Research Square preprint supplement (doi:10.21203/rs.3.rs-8426574/v1), 2026-02-02
Supplement: Supplementary file 17 [file 动态报告-蒋天虹-20250226141134.pdf › Plantar pressure and gait analysis/aerobics /动态报告-蒋天虹-20250226141134.pdf]

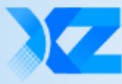

左右脚动态数据

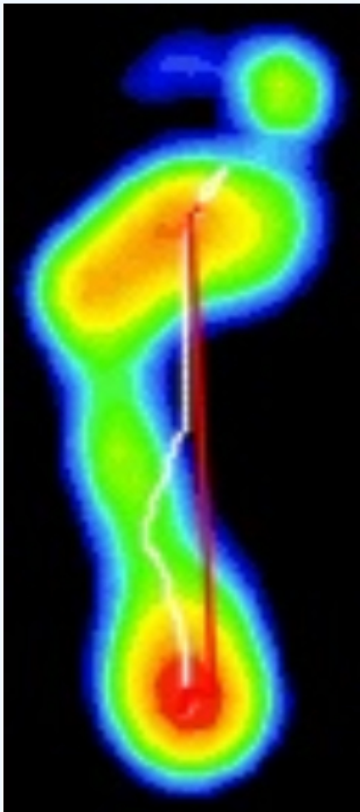

| 第2步      | Cop数据     | 第1步      |
|----------|-----------|----------|
| 173.91   | cop距离【mm】 | 196.70   |
| 10.62    | 步偏脚【°】    | 6.74     |
| 8307.65  | 面积【mm²】   | 8678.36  |
| 19519.94 | 压力【kgf】   | 18764.39 |
| 2.21     | 压强【gr/%】  | 1.98     |
| 31487.45 | 最大压力【kgf】 | 30758.34 |
| 0.15     | 速度【mm/ms】 | 0.16     |

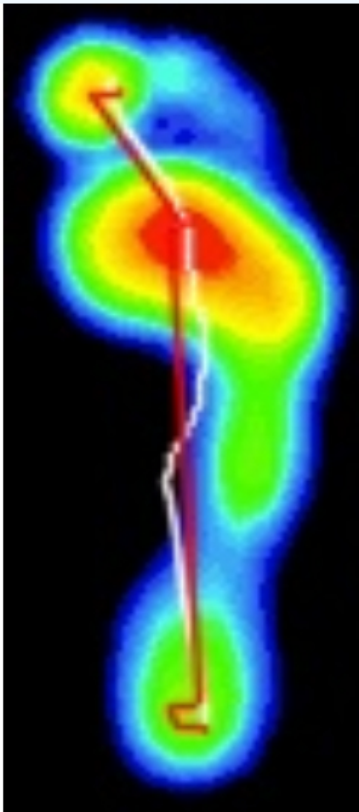

支撑相

左脚

|             |          |
|-------------|----------|
| ● 着地期 7%    |          |
| 时长【ms】      | 84.00    |
| 平均速度【mm/ms】 | 0.25     |
| 最大面积【mm²】   | 3755.25  |
| 最大压力【kgf】   | 6024.94  |
| ● 平足期 81%   |          |
| 时长【ms】      | 912.00   |
| 平均速度【mm/ms】 | 0.14     |
| 最大面积【mm²】   | 12240.45 |
| 最大压力【kgf】   | 28084.64 |
| ● 蹬伸期 12%   |          |
| 时长【ms】      | 132.00   |
| 平均速度【mm/ms】 | 0.20     |
| 最大面积【mm²】   | 5518.80  |
| 最大压力【kgf】   | 12092.20 |

右脚

|             |          |
|-------------|----------|
| ● 着地期 7%    |          |
| 时长【ms】      | 80.00    |
| 平均速度【mm/ms】 | 0.27     |
| 最大面积【mm²】   | 3649.05  |
| 最大压力【kgf】   | 5537.72  |
| ● 平足期 76%   |          |
| 时长【ms】      | 828.00   |
| 平均速度【mm/ms】 | 0.15     |
| 最大面积【mm²】   | 12983.40 |
| 最大压力【kgf】   | 29801.61 |
| ● 蹬伸期 17%   |          |
| 时长【ms】      | 180.00   |
| 平均速度【mm/ms】 | 0.20     |
| 最大面积【mm²】   | 6569.10  |
| 最大压力【kgf】   | 14877.35 |

内外翻

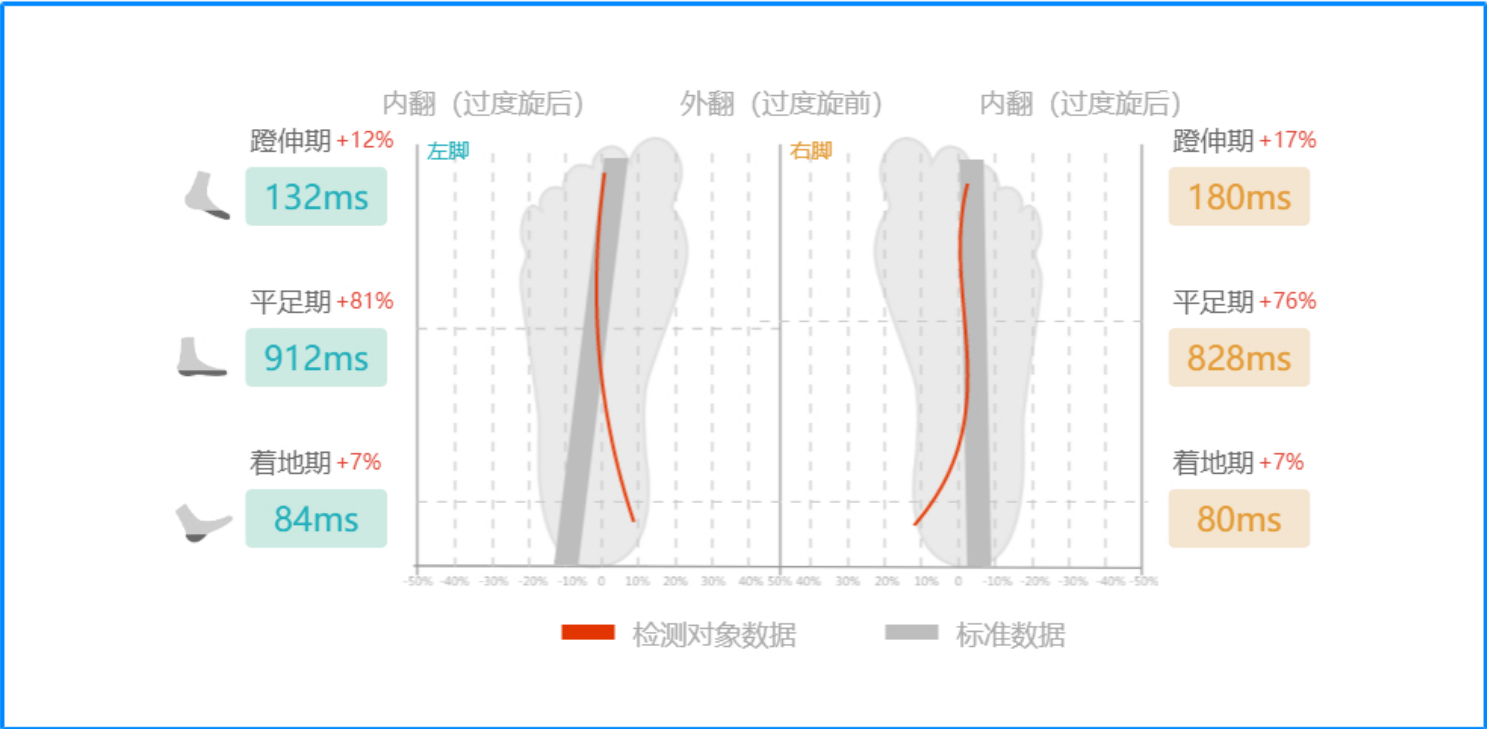

足弓类型

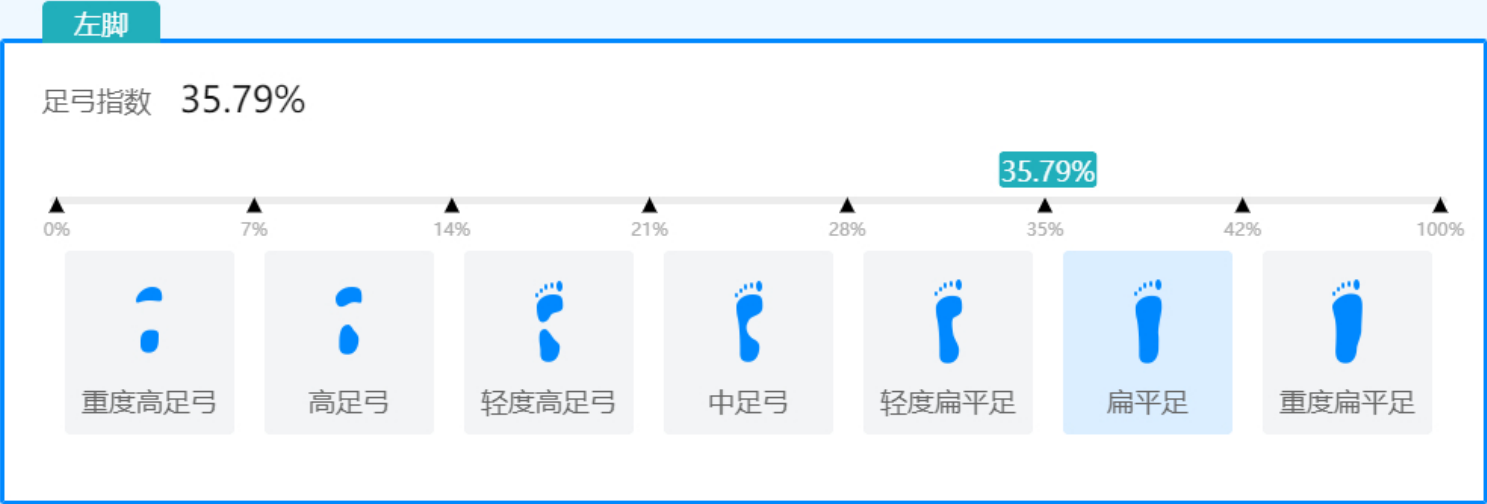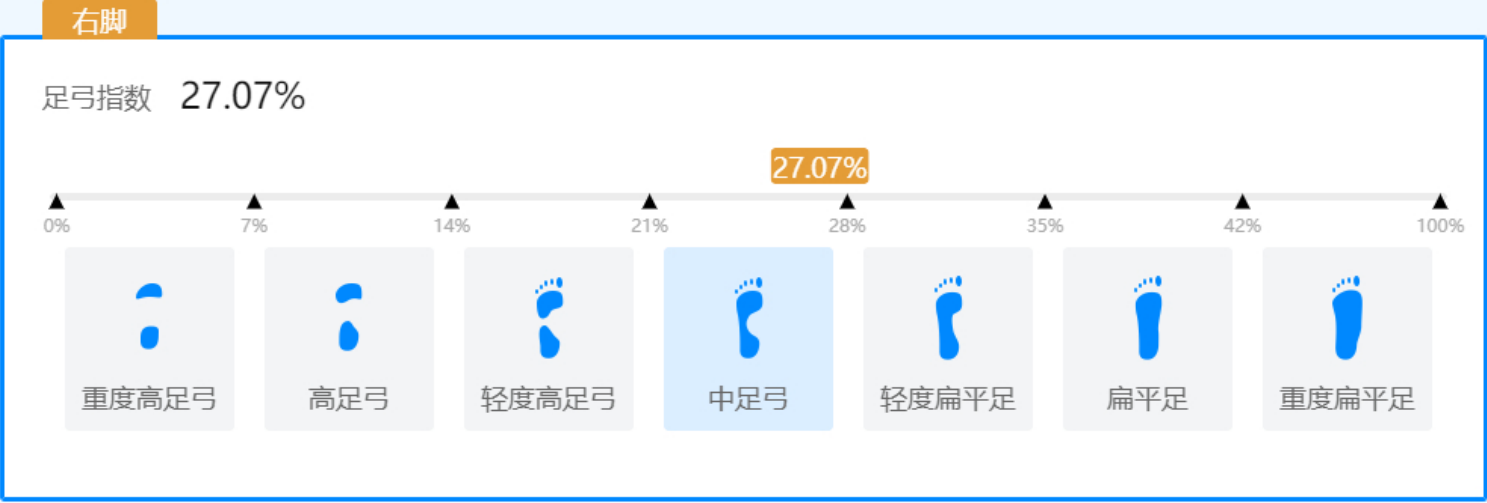

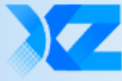

报告结论
