# Supplementary material for: Individualized Corrective Training Based on Precision Biomechanical Assessment for the Prevention of Sports Injuries in Adolescents
Source: Research Square preprint supplement (doi:10.21203/rs.3.rs-8426574/v1), 2026-02-02
Supplement: Supplementary file 18 [file 动态报告-陶奕霖-20250226105633.pdf › Plantar pressure and gait analysis/aerobics /动态报告-陶奕霖-20250226105633.pdf]

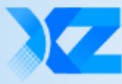

左右脚动态数据

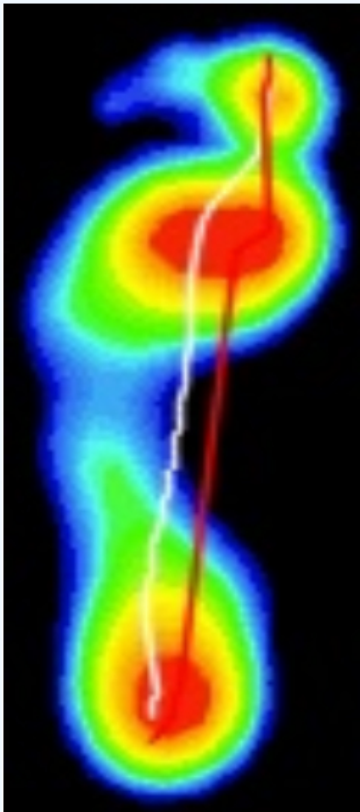

| 第3步      | Cop数据     | 第1步      |
|----------|-----------|----------|
| 211.94   | cop距离【mm】 | 214.32   |
| 7.16     | 步偏脚【°】    | 12.13    |
| 9123.38  | 面积【mm²】   | 8764.05  |
| 20787.58 | 压力【kgf】   | 23326.73 |
| 2.10     | 压强【gr/%】  | 2.43     |
| 34807.86 | 最大压力【kgf】 | 37347.29 |
| 0.25     | 速度【mm/ms】 | 0.24     |

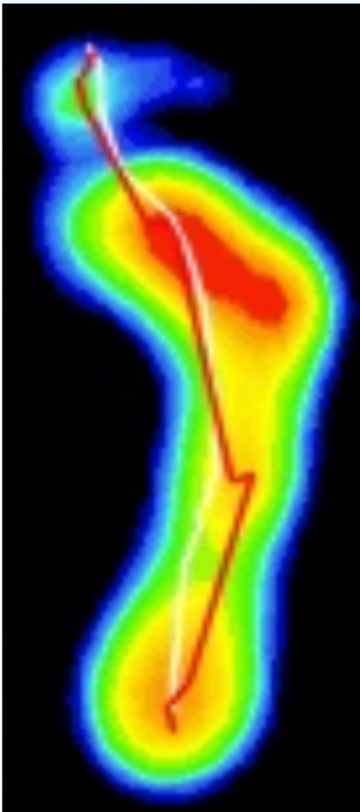

支撑相

左脚

|             |          |
|-------------|----------|
| ● 着地期 9%    |          |
| 时长【ms】      | 84.00    |
| 平均速度【mm/ms】 | 0.11     |
| 最大面积【mm²】   | 3556.80  |
| 最大压力【kgf】   | 8158.25  |
| ● 平足期 76%   |          |
| 时长【ms】      | 720.00   |
| 平均速度【mm/ms】 | 0.22     |
| 最大面积【mm²】   | 14883.30 |
| 最大压力【kgf】   | 36841.34 |
| ● 蹬伸期 15%   |          |
| 时长【ms】      | 144.00   |
| 平均速度【mm/ms】 | 0.26     |
| 最大面积【mm²】   | 5331.60  |
| 最大压力【kgf】   | 11561.96 |

右脚

|             |          |
|-------------|----------|
| ● 着地期 7%    |          |
| 时长【ms】      | 66.67    |
| 平均速度【mm/ms】 | 0.12     |
| 最大面积【mm²】   | 3373.13  |
| 最大压力【kgf】   | 7067.23  |
| ● 平足期 82%   |          |
| 时长【ms】      | 756.67   |
| 平均速度【mm/ms】 | 0.19     |
| 最大面积【mm²】   | 14191.13 |
| 最大压力【kgf】   | 36944.76 |
| ● 蹬伸期 11%   |          |
| 时长【ms】      | 103.33   |
| 平均速度【mm/ms】 | 0.46     |
| 最大面积【mm²】   | 5326.88  |
| 最大压力【kg/f】  | 10752.89 |

内外翻

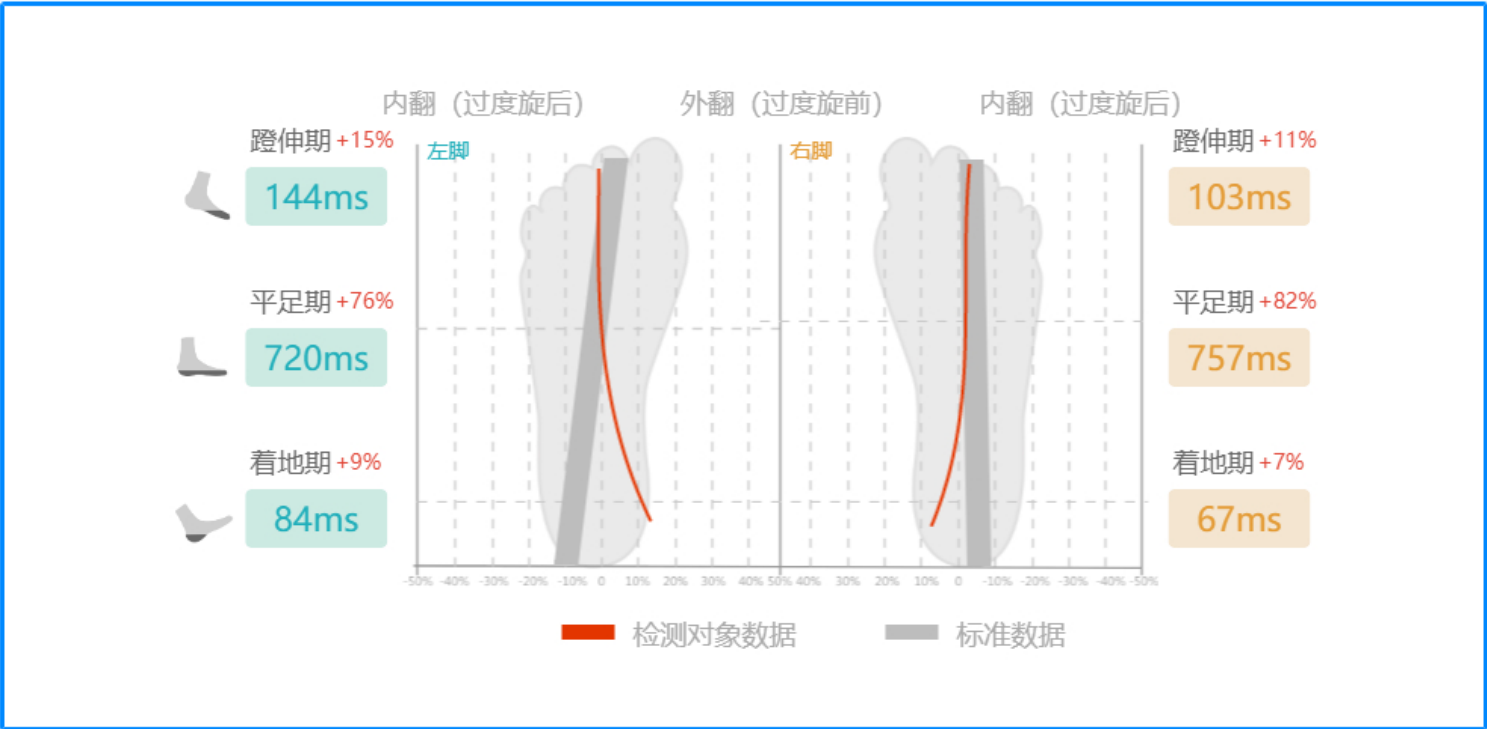

足弓类型

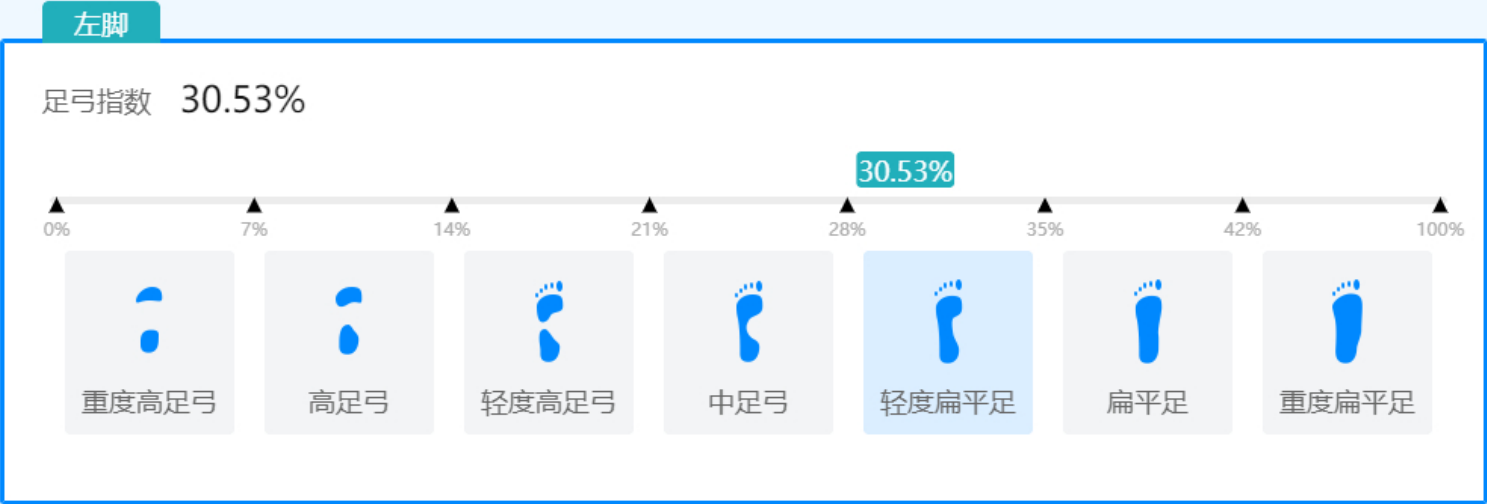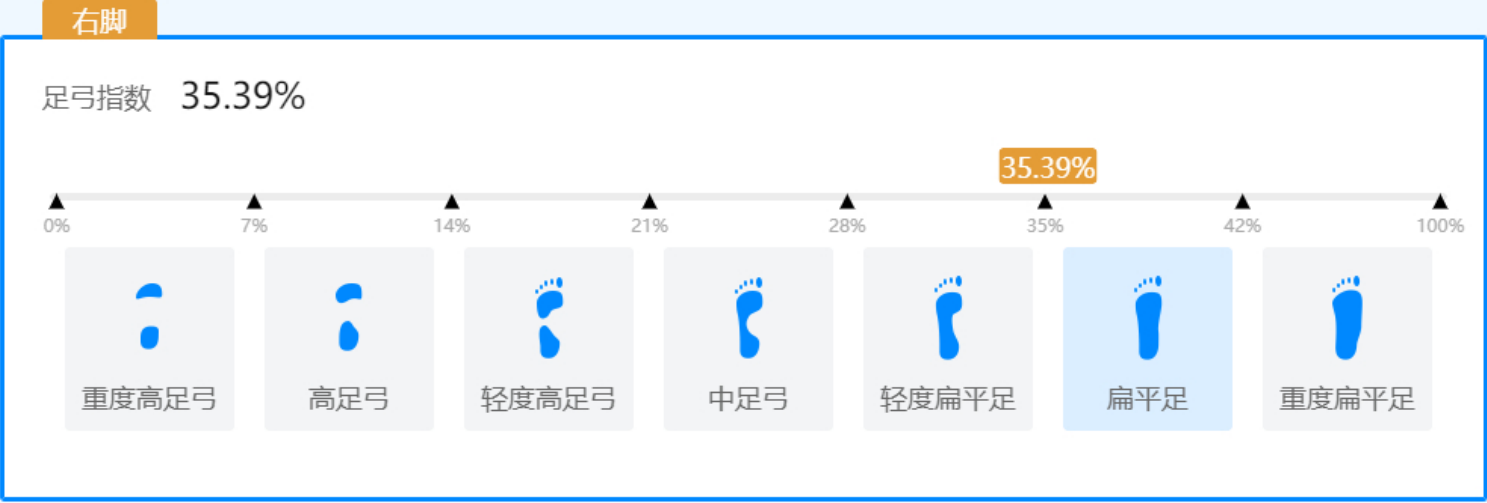

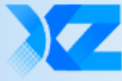

报告结论
