# Supplementary material for: Individualized Corrective Training Based on Precision Biomechanical Assessment for the Prevention of Sports Injuries in Adolescents
Source: Research Square preprint supplement (doi:10.21203/rs.3.rs-8426574/v1), 2026-02-02
Supplement: Supplementary file 19 [file 动态报告-马柯辉-20250226095502.pdf › Plantar pressure and gait analysis/aerobics /动态报告-马柯辉-20250226095502.pdf]

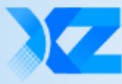

左右脚动态数据

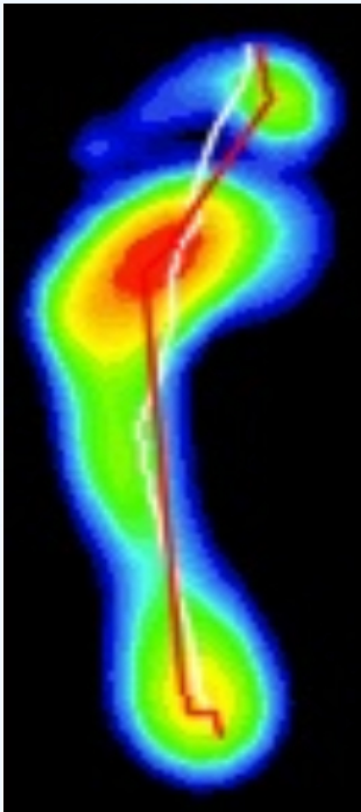

| 第2步      | Cop数据     | 第1步      |
|----------|-----------|----------|
| 217.49   | cop距离【mm】 | 210.30   |
| -8.10    | 步偏脚【°】    | -0.98    |
| 7846.11  | 面积【mm²】   | 9274.22  |
| 18612.41 | 压力【kgf】   | 20890.62 |
| 2.21     | 压强【gr/%】  | 2.11     |
| 28866.54 | 最大压力【kgf】 | 32253.95 |
| 0.19     | 速度【mm/ms】 | 0.19     |

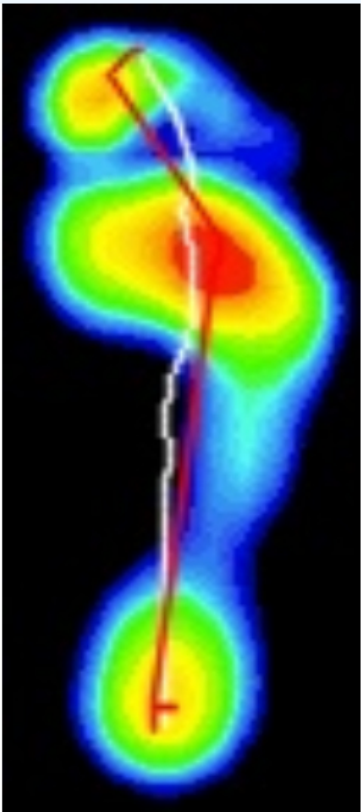

支撑相

左脚

|             |          |
|-------------|----------|
| ● 着地期 10%   |          |
| 时长【ms】      | 113.33   |
| 平均速度【mm/ms】 | 0.10     |
| 最大面积【mm²】   | 3497.63  |
| 最大压力【kgf】   | 8044.37  |
| ● 平足期 71%   |          |
| 时长【ms】      | 786.67   |
| 平均速度【mm/ms】 | 0.18     |
| 最大面积【mm²】   | 13017.38 |
| 最大压力【kgf】   | 30013.71 |
| ● 蹬伸期 18%   |          |
| 时长【ms】      | 213.33   |
| 平均速度【mm/ms】 | 0.18     |
| 最大面积【mm²】   | 7114.88  |
| 最大压力【kgf】   | 18139.96 |

右脚

|             |          |
|-------------|----------|
| ● 着地期 11%   |          |
| 时长【ms】      | 116.67   |
| 平均速度【mm/ms】 | 0.14     |
| 最大面积【mm²】   | 4046.25  |
| 最大压力【kgf】   | 9495.98  |
| ● 平足期 73%   |          |
| 时长【ms】      | 803.33   |
| 平均速度【mm/ms】 | 0.18     |
| 最大面积【mm²】   | 12999.00 |
| 最大压力【kgf】   | 31796.14 |
| ● 蹬伸期 17%   |          |
| 时长【ms】      | 180.00   |
| 平均速度【mm/ms】 | 0.27     |
| 最大面积【mm²】   | 6543.75  |
| 最大压力【kg/f】  | 15696.69 |

内外翻

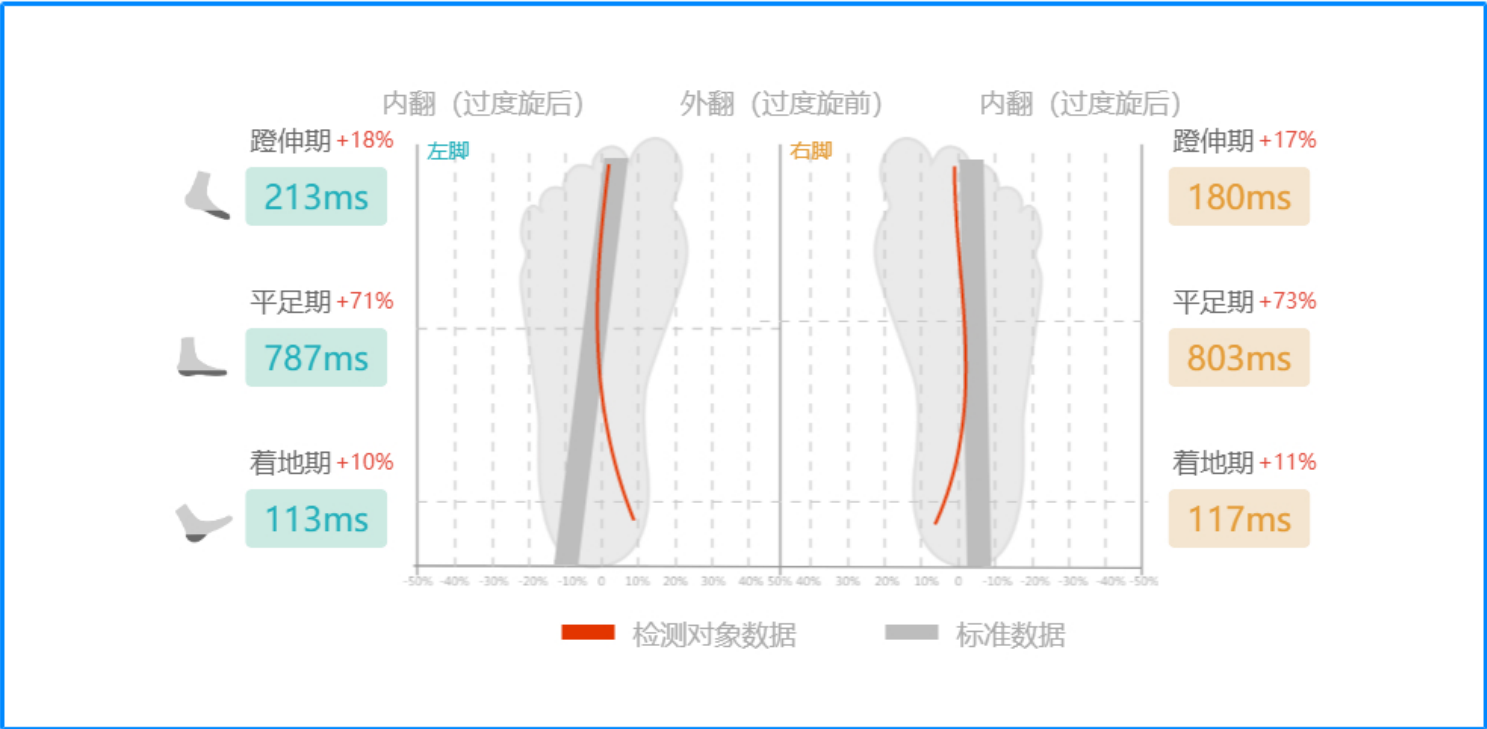

足弓类型

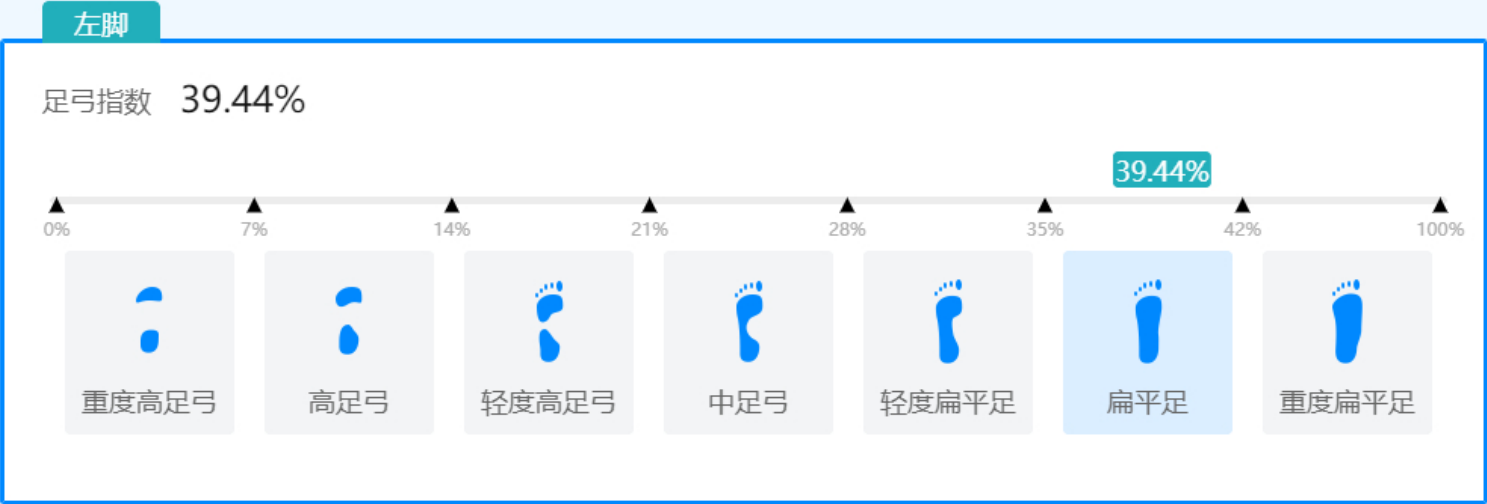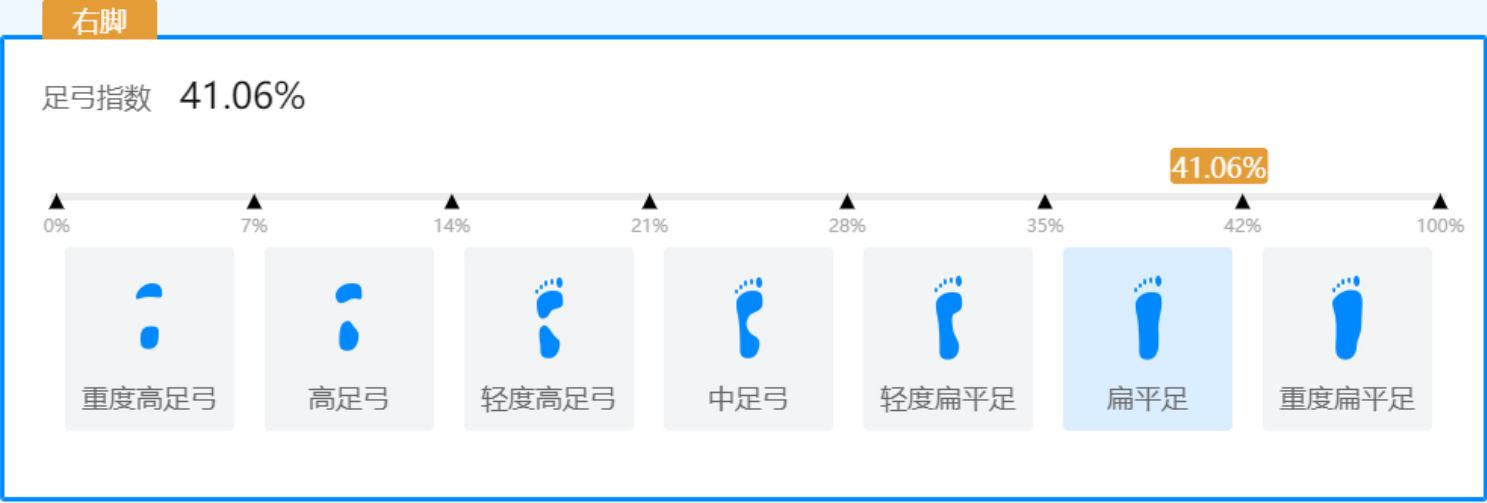

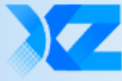

报告结论
