# Supplementary material for: Individualized Corrective Training Based on Precision Biomechanical Assessment for the Prevention of Sports Injuries in Adolescents
Source: Research Square preprint supplement (doi:10.21203/rs.3.rs-8426574/v1), 2026-02-02
Supplement: Supplementary file 20 [file 平衡报告-侯文琪-20250226104207.pdf › Plantar pressure and gait analysis/aerobics /平衡报告-侯文琪-20250226104207.pdf]

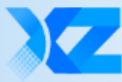

双脚重心变化

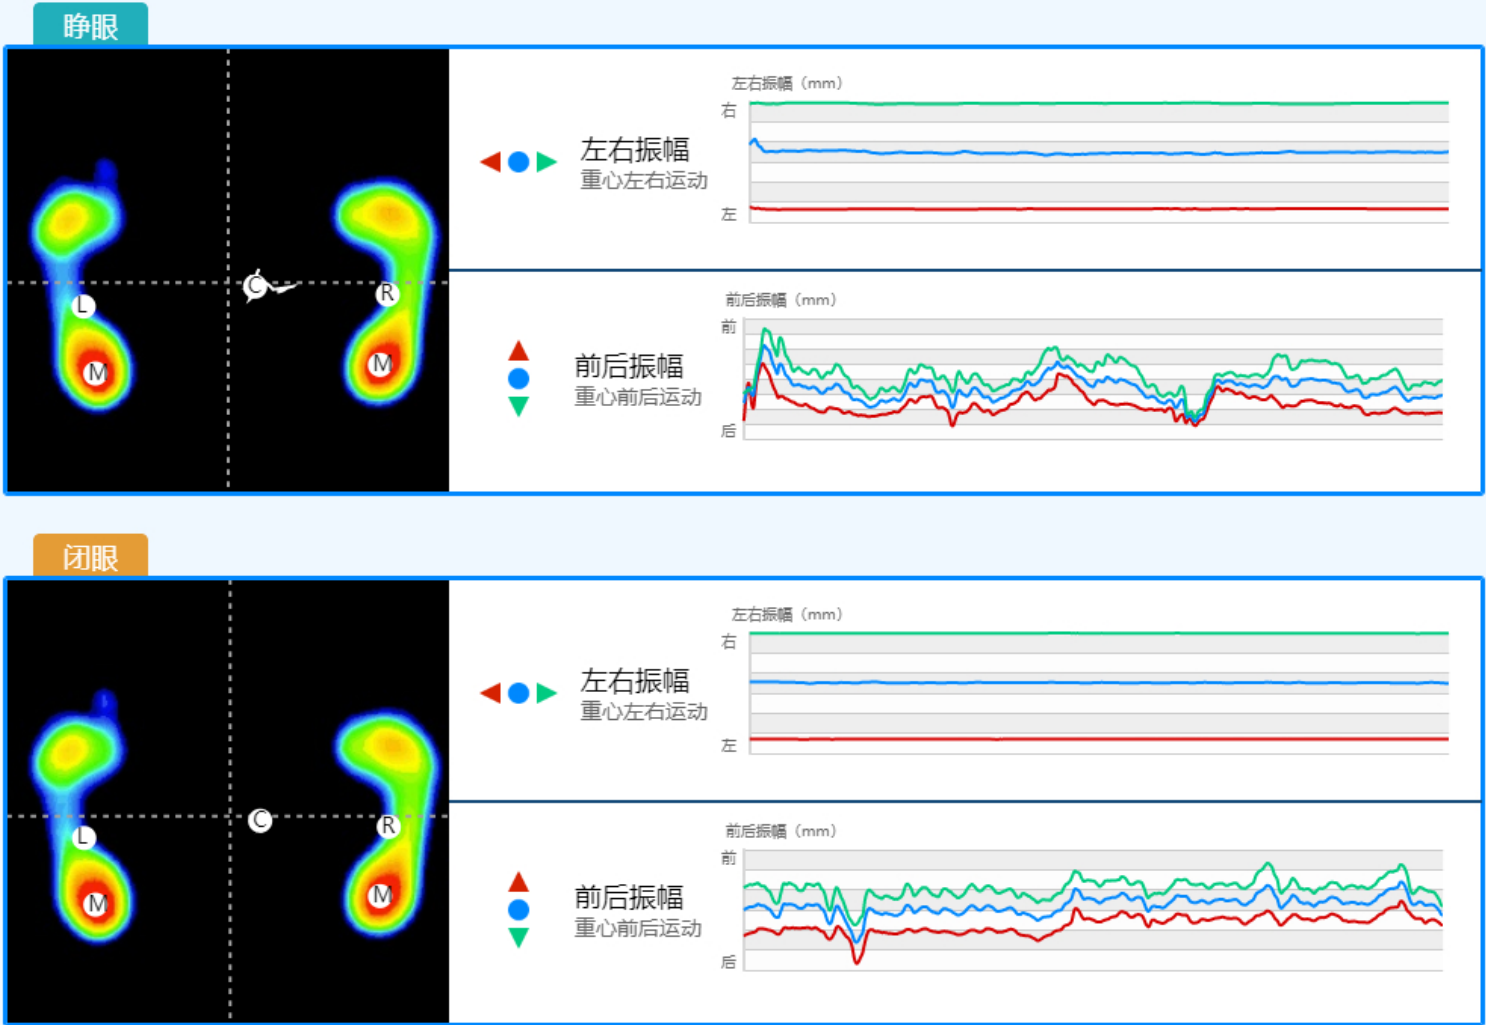

Cop数据

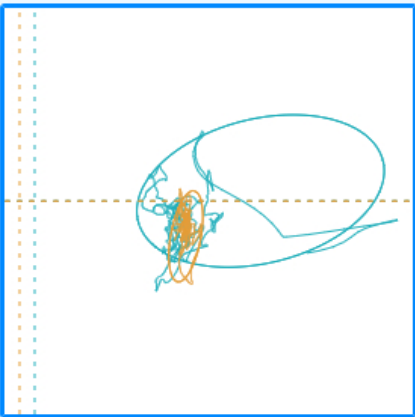

— 睁眼    — 闭眼

|             | 睁眼     | 闭眼     |
|-------------|--------|--------|
| 平均位置X【mm】   | 23.45  | 26.07  |
| 平均位置Y【mm】   | -3.27  | -3.89  |
| 标准差X【mm】    | 4.13   | 0.78   |
| 标准差Y【mm】    | 3.87   | 2.19   |
| 距离【mm】      | 301.39 | 160.97 |
| 平均速度【mm/ms】 | 0.01   | 0.01   |
| 距离/表面积      | 0.43   | 3.00   |
| 偏心率         | 0.82   | 0.95   |
| 倾斜角度【°】     | -13.93 | -79.78 |

平衡报告

侯文琪 20岁 女 80.0kg 170.0cm 2025-2-26 10:41:01

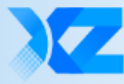

报告结论

睁眼  
左右晃动比前后晃动更明显  
闭眼  
前后晃动比左右晃动更明显
