# Supplementary material for: Individualized Corrective Training Based on Precision Biomechanical Assessment for the Prevention of Sports Injuries in Adolescents
Source: Research Square preprint supplement (doi:10.21203/rs.3.rs-8426574/v1), 2026-02-02
Supplement: Supplementary file 21 [file 平衡报告-侯文琪-20250226104332.pdf › Plantar pressure and gait analysis/aerobics /平衡报告-侯文琪-20250226104332.pdf]

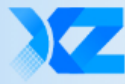

双脚重心变化

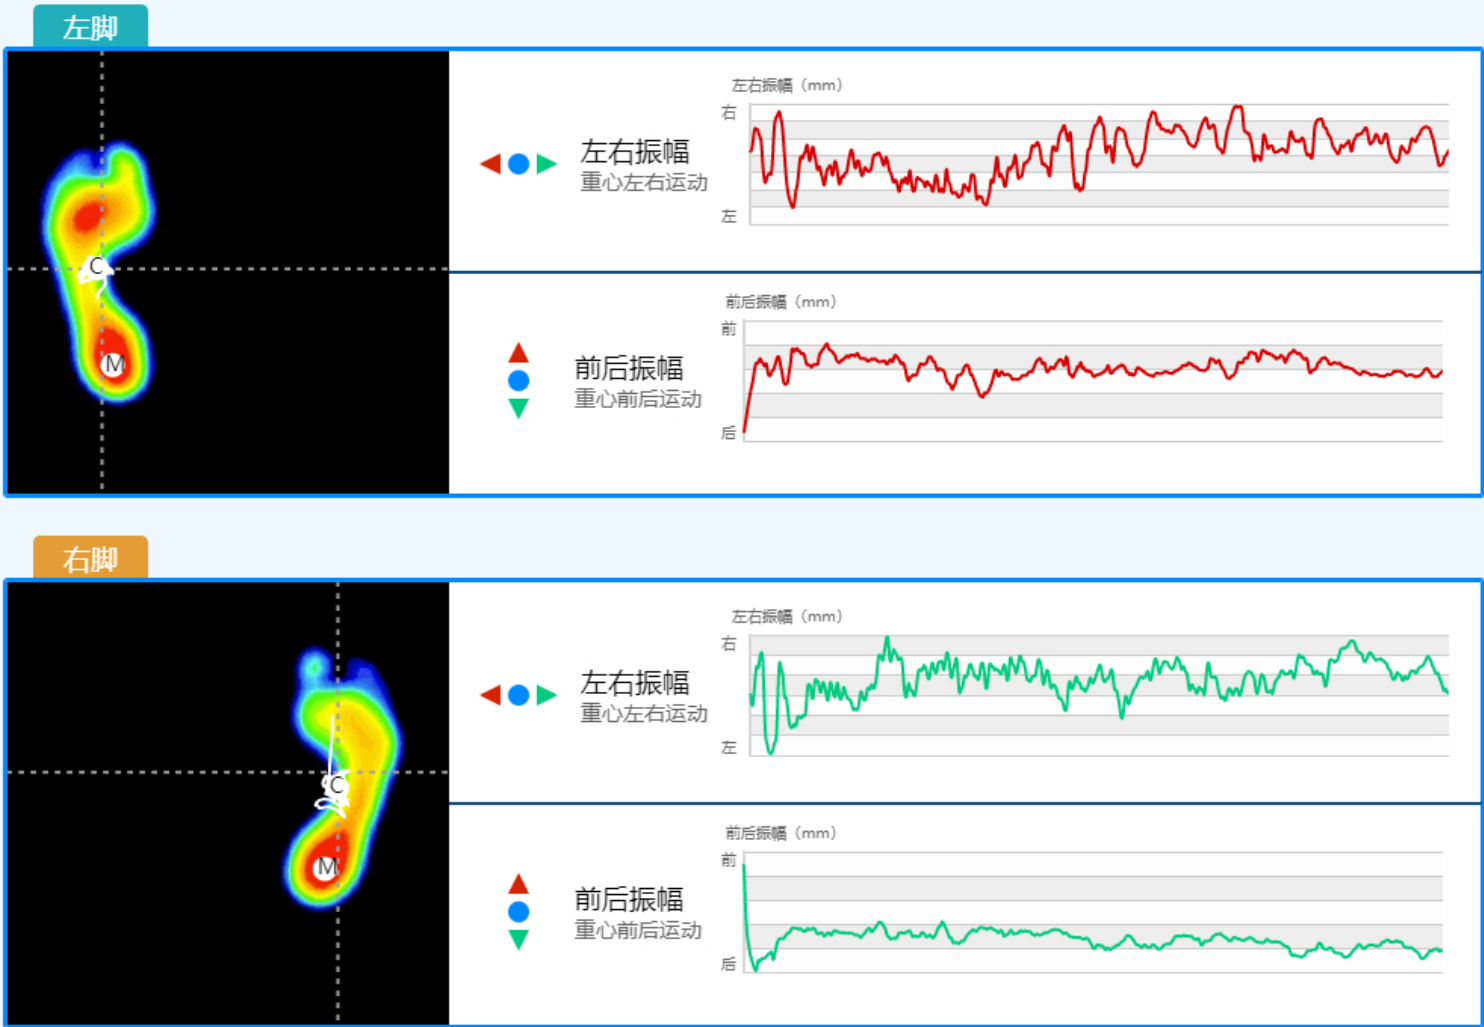

Cop数据

左脚 右脚

|             | 左脚     | 右脚     |
|-------------|--------|--------|
| 平均位置X【mm】   | -4.58  | -0.88  |
| 平均位置Y【mm】   | 0.26   | -13.37 |
| 标准差X【mm】    | 6.52   | 4.57   |
| 标准差Y【mm】    | 4.21   | 7.68   |
| 距离【mm】      | 804.84 | 839.61 |
| 平均速度【mm/ms】 | 0.03   | 0.03   |
| 距离/表面积      | 1.29   | 0.46   |
| 偏心率         | 0.57   | 0.95   |
| 倾斜角度【°】     | -60.16 | -79.46 |

# 平衡报告

侯文琪 20岁 女 80.0kg 170.0cm 2025-2-26 10:42:21

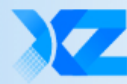

## 报告结论

睁眼  
前后振幅大于参考值  
前后晃动比左右晃动更明显
