# Supplementary material for: Individualized Corrective Training Based on Precision Biomechanical Assessment for the Prevention of Sports Injuries in Adolescents
Source: Research Square preprint supplement (doi:10.21203/rs.3.rs-8426574/v1), 2026-02-02
Supplement: Supplementary file 23 [file 平衡报告-冯晨一-20250226101654.pdf › Plantar pressure and gait analysis/aerobics /平衡报告-冯晨一-20250226101654.pdf]

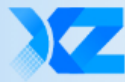

双脚重心变化

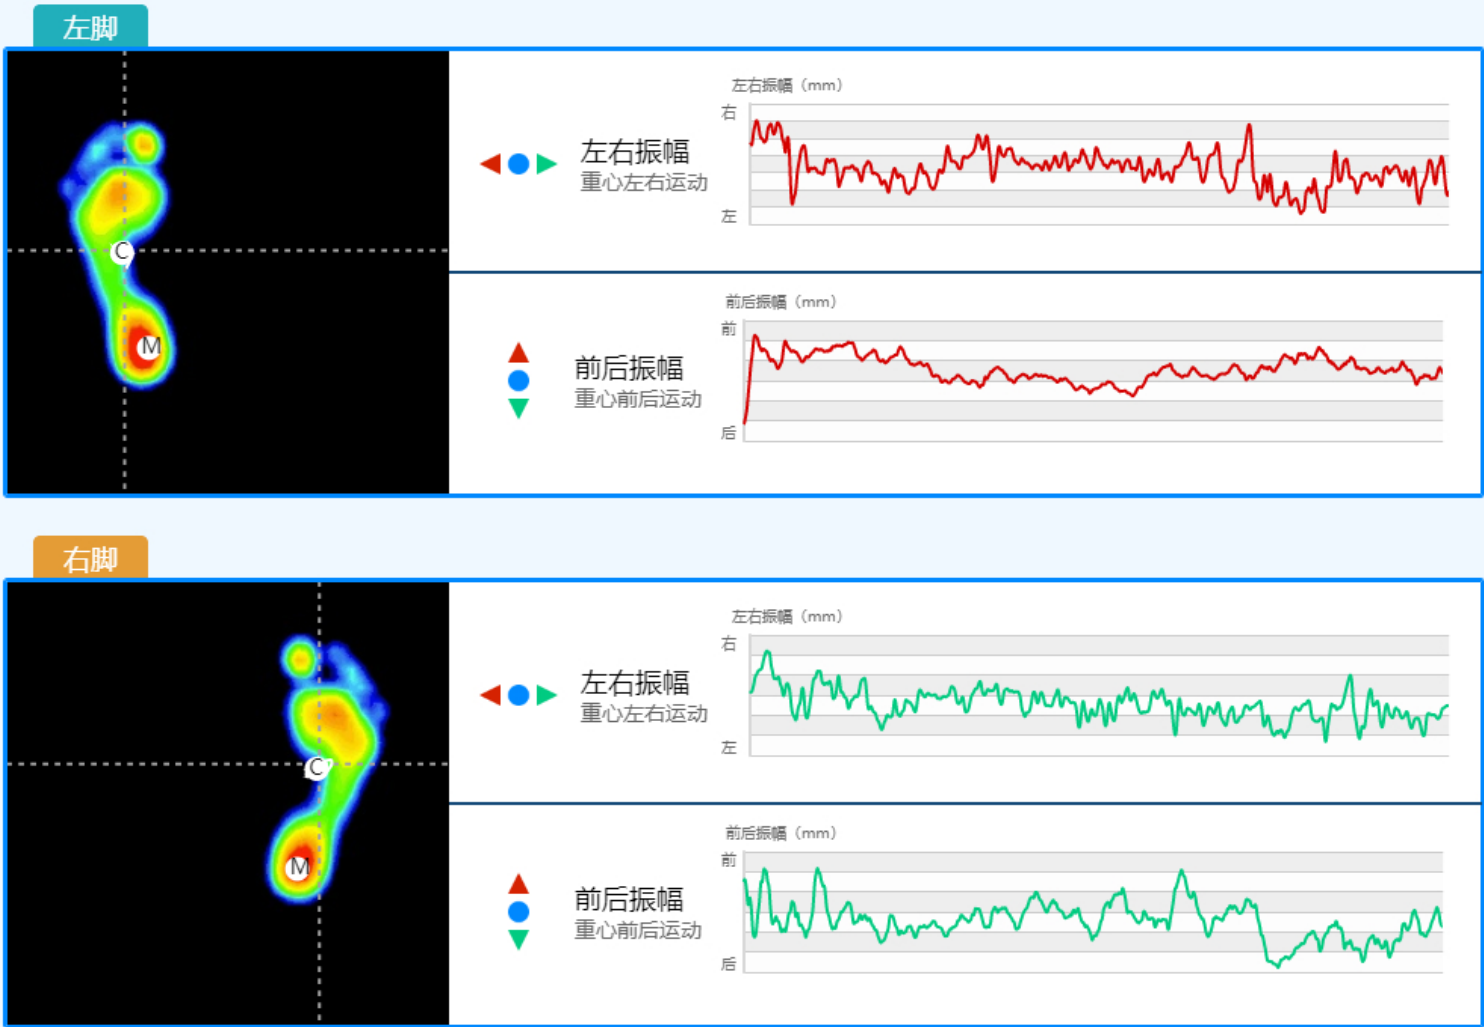

Cop数据

— 左脚    — 右脚

|             | 左脚     | 右脚     |
|-------------|--------|--------|
| 平均位置X【mm】   | -2.39  | -2.35  |
| 平均位置Y【mm】   | -2.17  | -4.40  |
| 标准差X【mm】    | 2.99   | 3.73   |
| 标准差Y【mm】    | 3.24   | 2.74   |
| 距离【mm】      | 469.79 | 599.77 |
| 平均速度【mm/ms】 | 0.02   | 0.02   |
| 距离/表面积      | 1.75   | 2.36   |
| 偏心率         | 0.72   | 0.80   |
| 倾斜角度【°】     | -40.89 | -4.85  |

# 平衡报告

冯晨一 20岁 女 48.0kg 161.0cm 2025-2-26 10:15:44

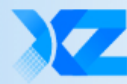

## 报告结论

睁眼  
左右晃动比前后晃动更明显
