# Supplementary material for: Individualized Corrective Training Based on Precision Biomechanical Assessment for the Prevention of Sports Injuries in Adolescents
Source: Research Square preprint supplement (doi:10.21203/rs.3.rs-8426574/v1), 2026-02-02
Supplement: Supplementary file 27 [file 平衡报告-孙微珊-20250226164608.pdf › Plantar pressure and gait analysis/aerobics /平衡报告-孙微珊-20250226164608.pdf]

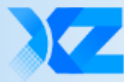

双脚重心变化

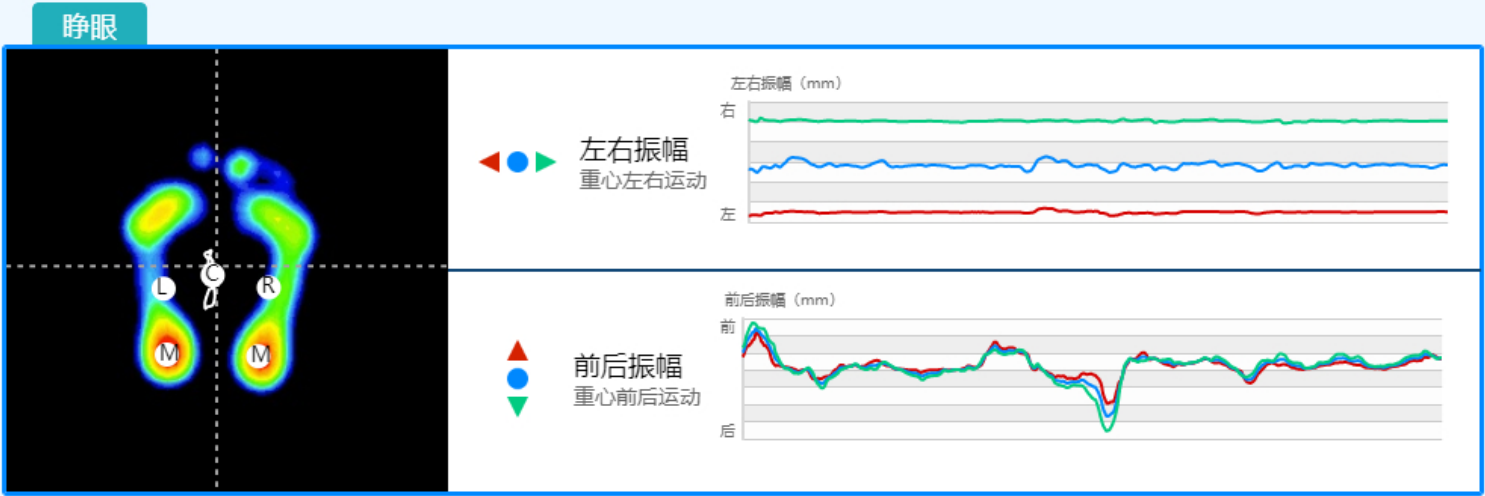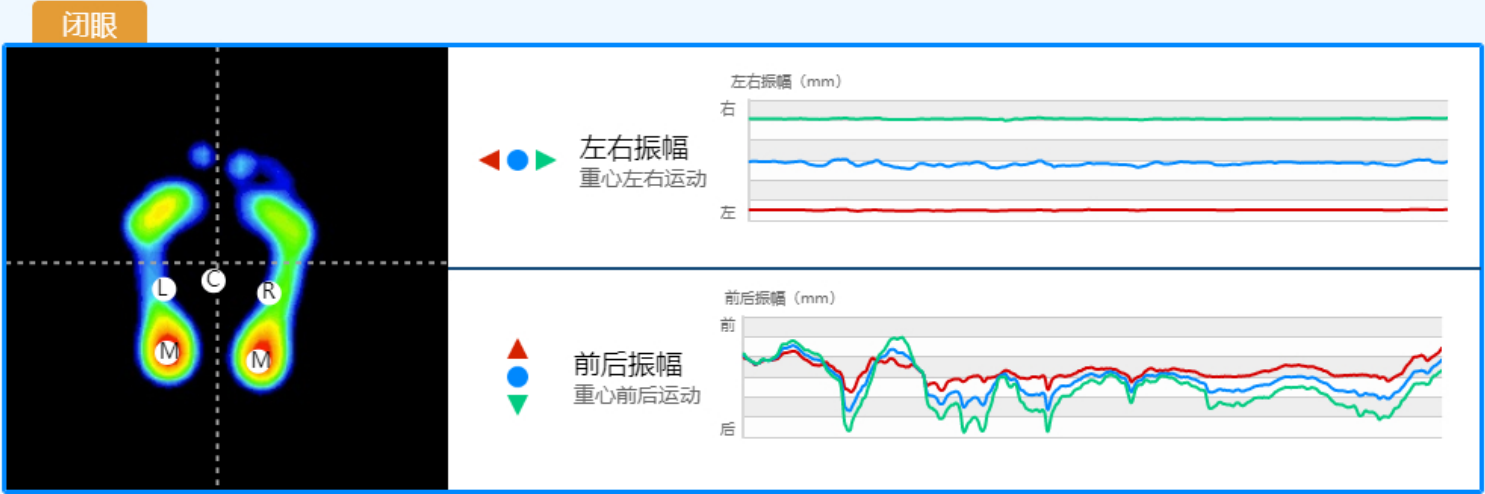

Cop数据

|             | 睁眼     | 闭眼     |
|-------------|--------|--------|
| 平均位置X【mm】   | -3.50  | -3.44  |
| 平均位置Y【mm】   | -7.75  | -15.75 |
| 标准差X【mm】    | 2.70   | 1.85   |
| 标准差Y【mm】    | 7.08   | 3.63   |
| 距离【mm】      | 362.96 | 203.13 |
| 平均速度【mm/ms】 | 0.01   | 0.01   |
| 距离/表面积      | 0.58   | 1.82   |
| 偏心率         | 0.95   | 0.83   |
| 倾斜角度【°】     | -89.99 | -4.26  |

# 平衡报告

孙微珊 19岁 女 56.0kg 164.0cm 2025-2-26 16:28:30

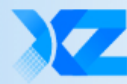

## 报告结论

睁眼  
前后振幅大于参考值  
前后晃动比左右晃动更明显  
闭眼  
前后晃动比左右晃动更明显
