# Supplementary material for: Individualized Corrective Training Based on Precision Biomechanical Assessment for the Prevention of Sports Injuries in Adolescents
Source: Research Square preprint supplement (doi:10.21203/rs.3.rs-8426574/v1), 2026-02-02
Supplement: Supplementary file 28 [file 平衡报告-孙悦-20250226102007.pdf › Plantar pressure and gait analysis/aerobics /平衡报告-孙悦-20250226102007.pdf]

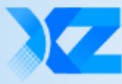

双脚重心变化

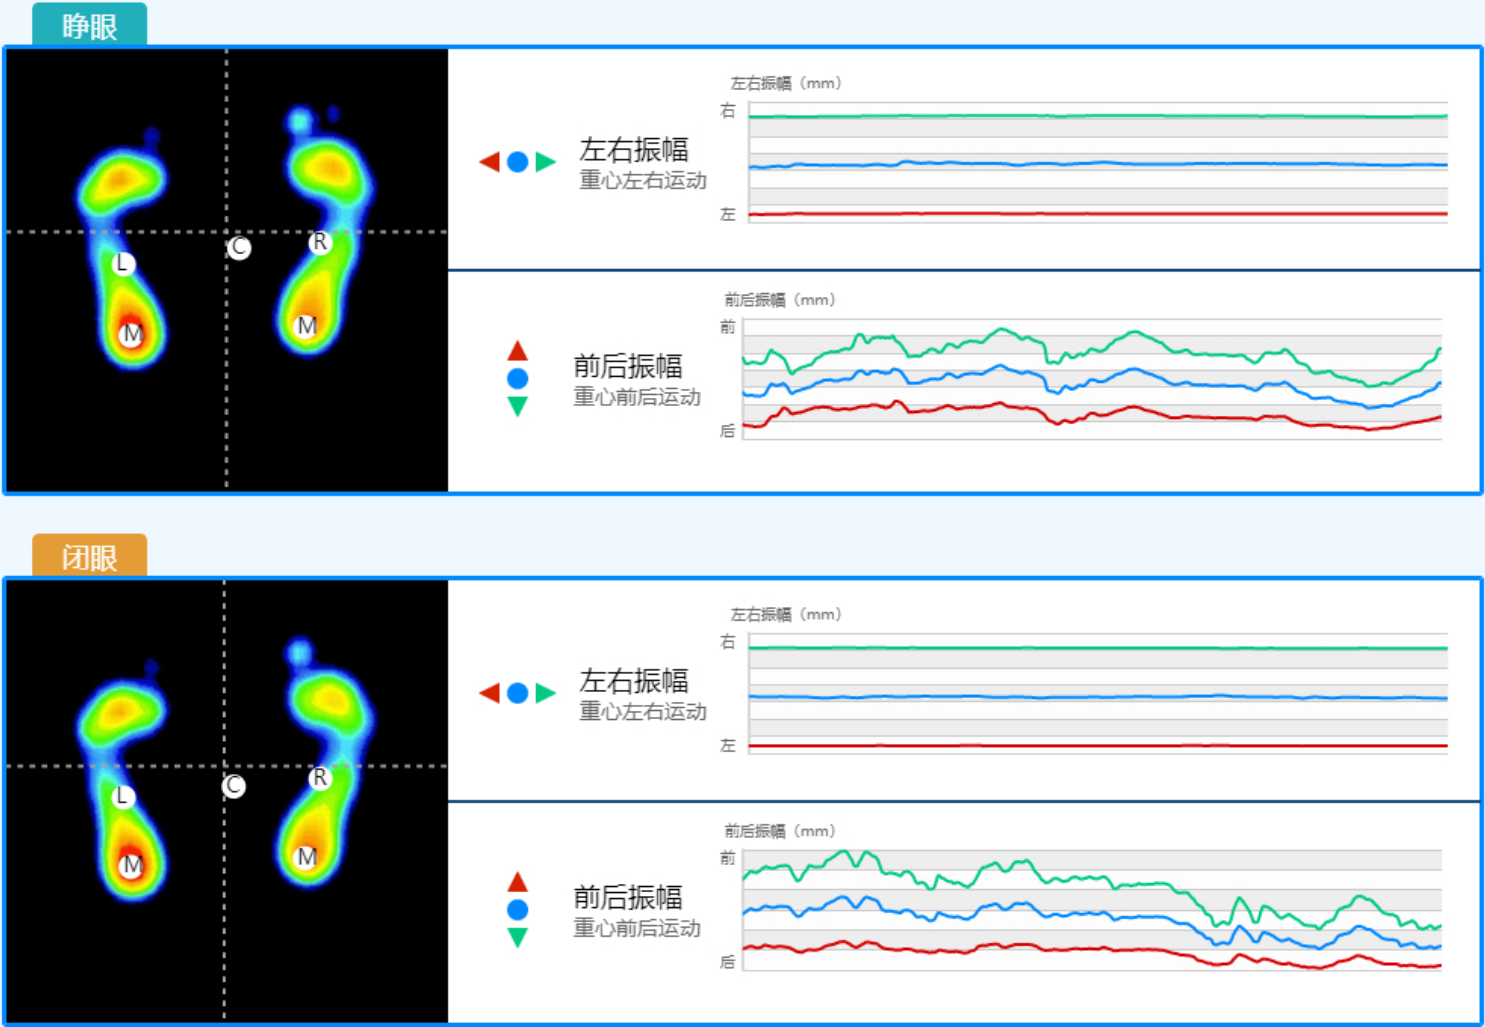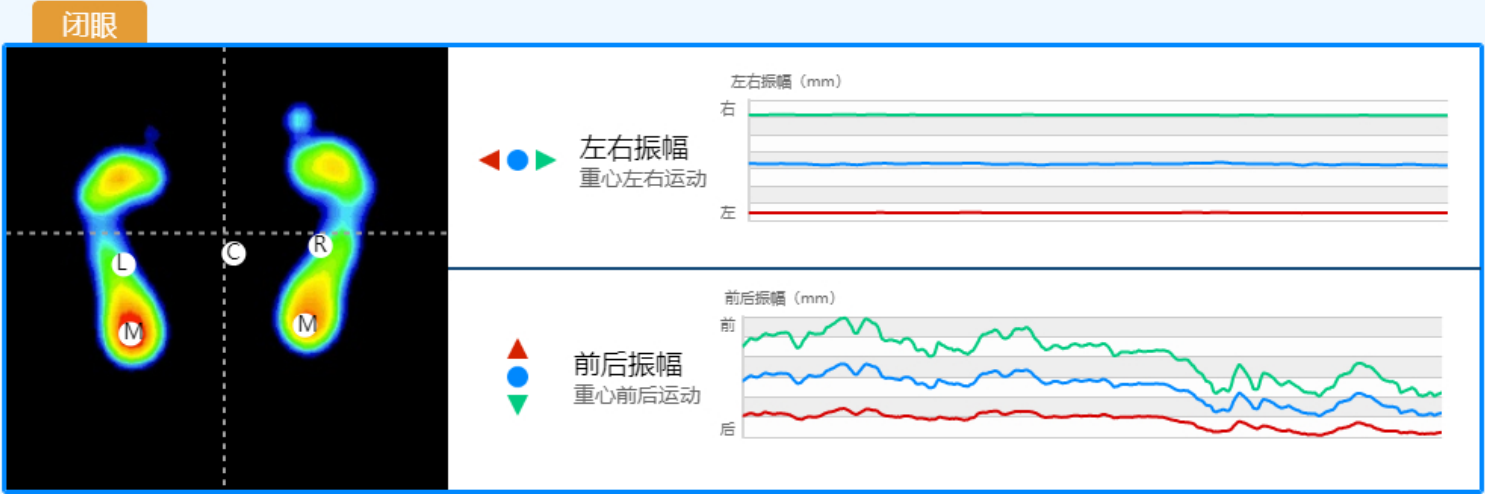

Cop数据

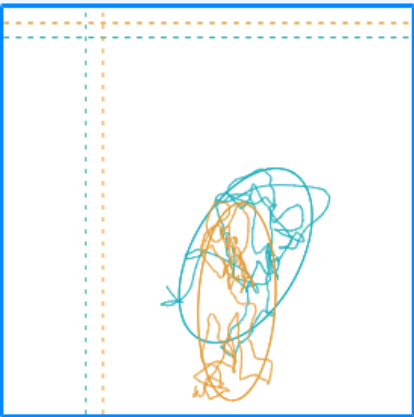

— 睁眼 — 闭眼

|             | 睁眼     | 闭眼     |
|-------------|--------|--------|
| 平均位置X【mm】   | 11.03  | 8.17   |
| 平均位置Y【mm】   | -14.20 | -17.90 |
| 标准差X【mm】    | 1.87   | 1.01   |
| 标准差Y【mm】    | 3.01   | 3.65   |
| 距离【mm】      | 119.48 | 108.11 |
| 平均速度【mm/ms】 | 0.00   | 0.00   |
| 距离/表面积      | 1.72   | 2.10   |
| 偏心率         | 0.83   | 0.92   |
| 倾斜角度【°】     | -60.69 | -86.89 |

# 平衡报告

孙悦 21岁 女 55.0kg 167.0cm 2025-2-26 10:18:57

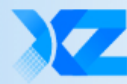

## 报告结论

睁眼  
身体重心位于右后方，骨盆右旋  
前后晃动比左右晃动更明显  
闭眼  
前后晃动比左右晃动更明显
