# Supplementary material for: Individualized Corrective Training Based on Precision Biomechanical Assessment for the Prevention of Sports Injuries in Adolescents
Source: Research Square preprint supplement (doi:10.21203/rs.3.rs-8426574/v1), 2026-02-02
Supplement: Supplementary file 29 [file 平衡报告-孙悦-20250226102143.pdf › Plantar pressure and gait analysis/aerobics /平衡报告-孙悦-20250226102143.pdf]

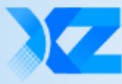

双脚重心变化

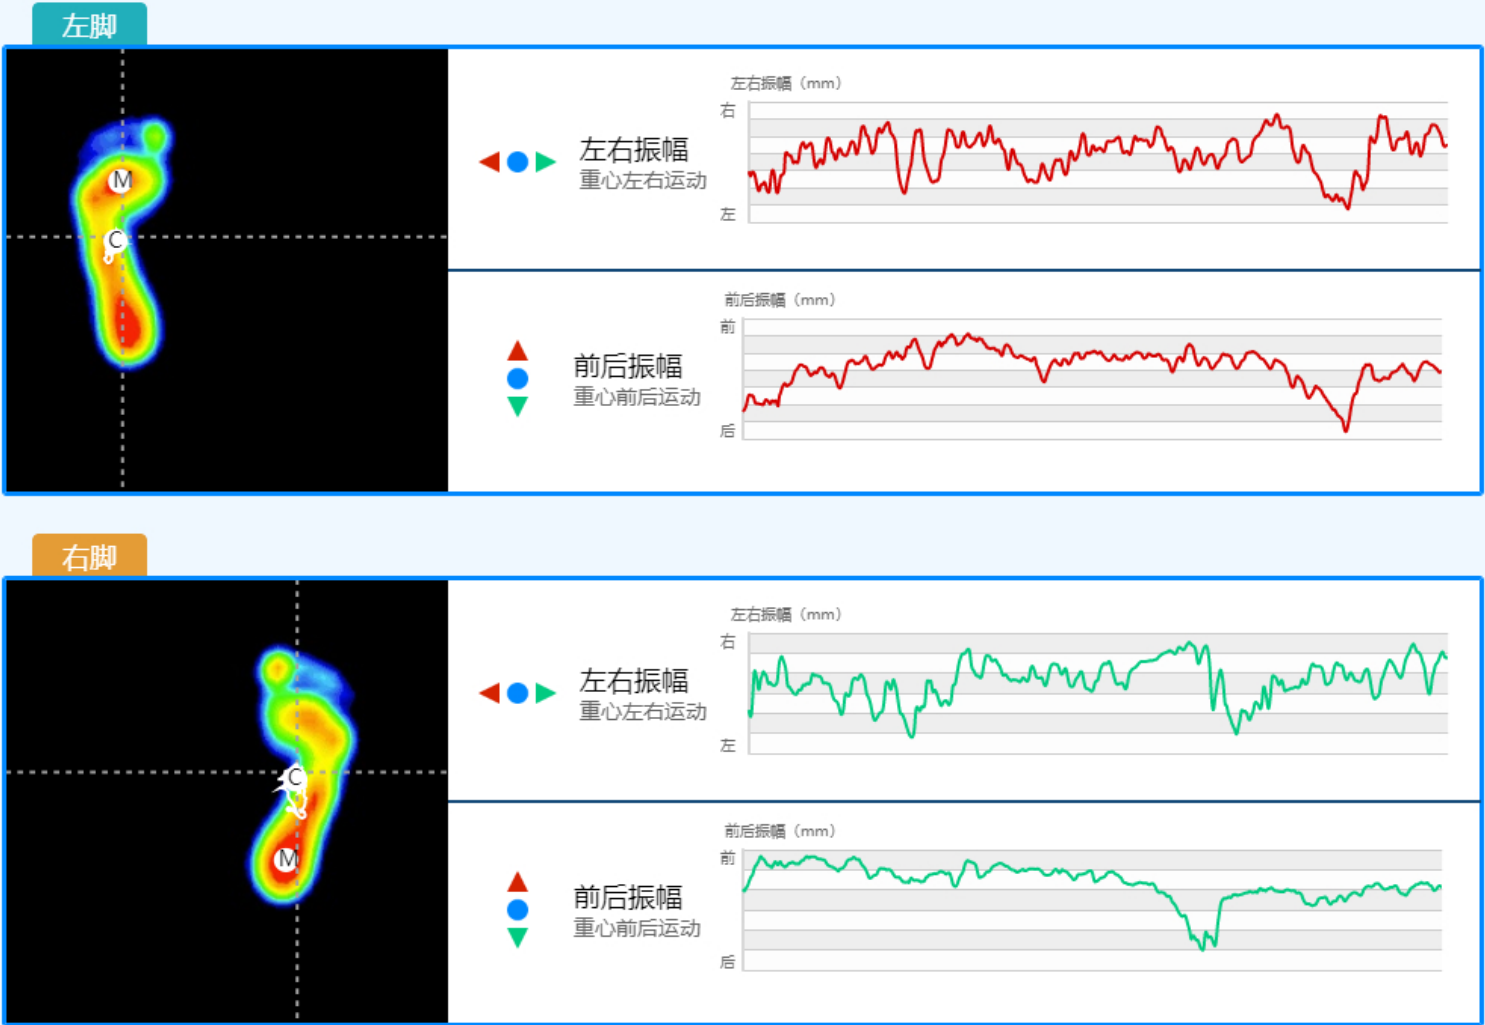

Cop数据

左脚

右脚

|             | 左脚     | 右脚     |
|-------------|--------|--------|
| 平均位置X【mm】   | -6.05  | -1.72  |
| 平均位置Y【mm】   | -4.01  | -6.47  |
| 标准差X【mm】    | 3.41   | 4.78   |
| 标准差Y【mm】    | 5.24   | 8.85   |
| 距离【mm】      | 463.78 | 578.99 |
| 平均速度【mm/ms】 | 0.02   | 0.02   |
| 距离/表面积      | 1.39   | 0.70   |
| 偏心率         | 0.87   | 0.88   |
| 倾斜角度【°】     | -81.63 | -7.17  |

# 平衡报告

孙悦 21岁 女 55.0kg 167.0cm 2025-2-26 10:20:20

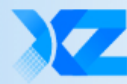

## 报告结论

睁眼  
前后振幅大于参考值  
前后晃动比左右晃动更明显
