# Supplementary material for: Individualized Corrective Training Based on Precision Biomechanical Assessment for the Prevention of Sports Injuries in Adolescents
Source: Research Square preprint supplement (doi:10.21203/rs.3.rs-8426574/v1), 2026-02-02
Supplement: Supplementary file 30 [file 平衡报告-宋璐杰-20250226094529.pdf › Plantar pressure and gait analysis/aerobics /平衡报告-宋璐杰-20250226094529.pdf]

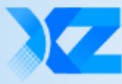

双脚重心变化

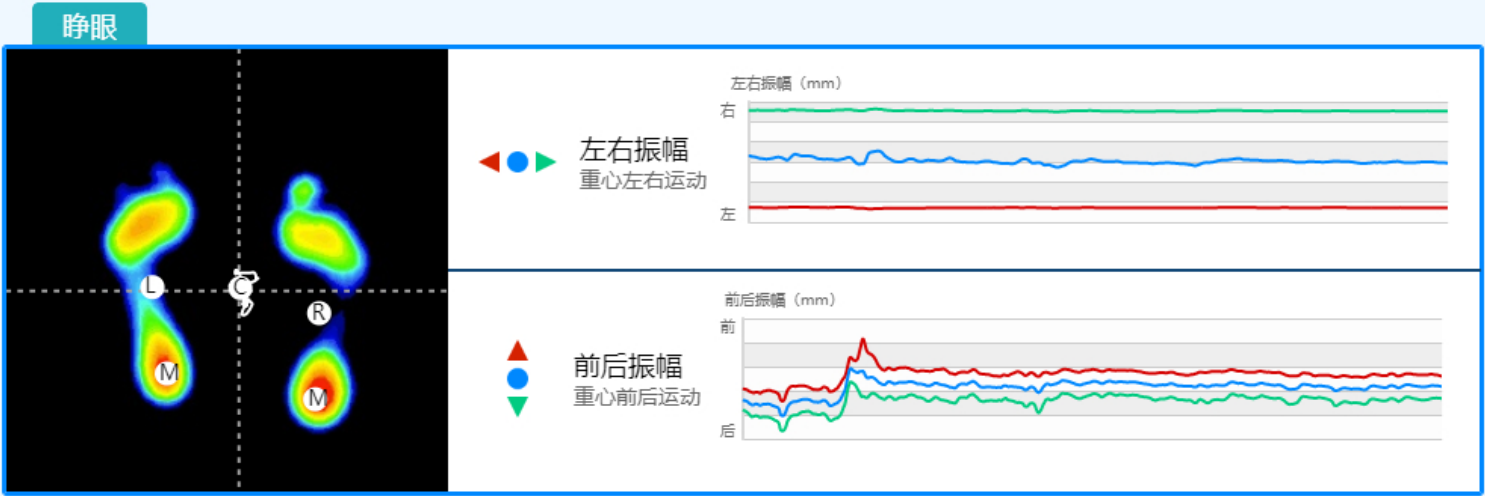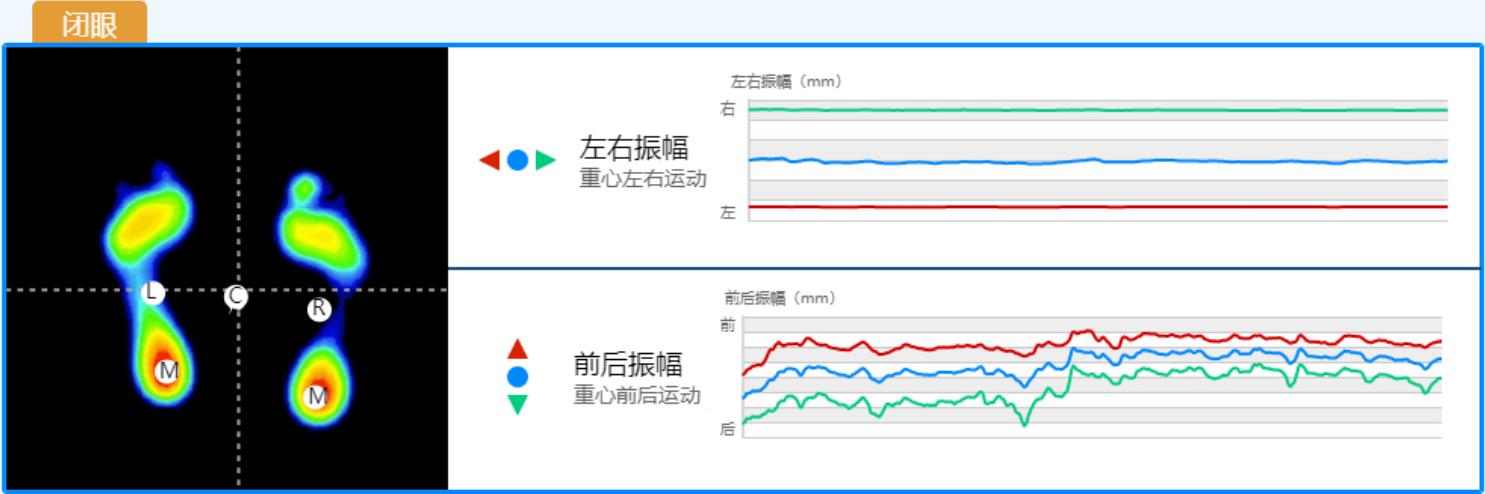

Cop数据

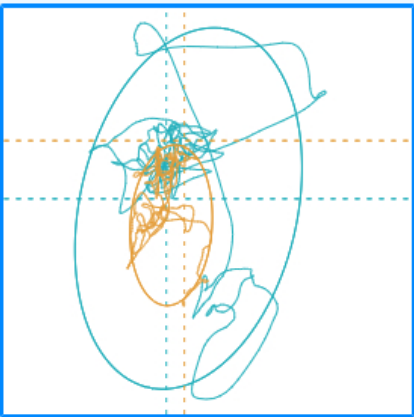

— 睁眼 — 闭眼

|             | 睁眼     | 闭眼     |
|-------------|--------|--------|
| 平均位置X【mm】   | 1.31   | -2.38  |
| 平均位置Y【mm】   | 2.69   | -5.86  |
| 标准差X【mm】    | 3.86   | 1.76   |
| 标准差Y【mm】    | 6.20   | 3.55   |
| 距离【mm】      | 330.84 | 173.29 |
| 平均速度【mm/ms】 | 0.01   | 0.01   |
| 距离/表面积      | 0.49   | 1.55   |
| 偏心率         | 0.81   | 0.86   |
| 倾斜角度【°】     | -77.52 | -86.18 |

# 平衡报告

宋璐杰 19岁 女 55.0kg 160.0cm 2025-2-26 09:44:19

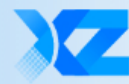

## 报告结论

睁眼  
前后振幅大于参考值  
前后晃动比左右晃动更明显  
闭眼  
前后晃动比左右晃动更明显
