# Supplementary material for: Individualized Corrective Training Based on Precision Biomechanical Assessment for the Prevention of Sports Injuries in Adolescents
Source: Research Square preprint supplement (doi:10.21203/rs.3.rs-8426574/v1), 2026-02-02
Supplement: Supplementary file 31 [file 平衡报告-宋璐杰-20250226094650.pdf › Plantar pressure and gait analysis/aerobics /平衡报告-宋璐杰-20250226094650.pdf]

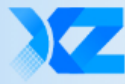

双脚重心变化

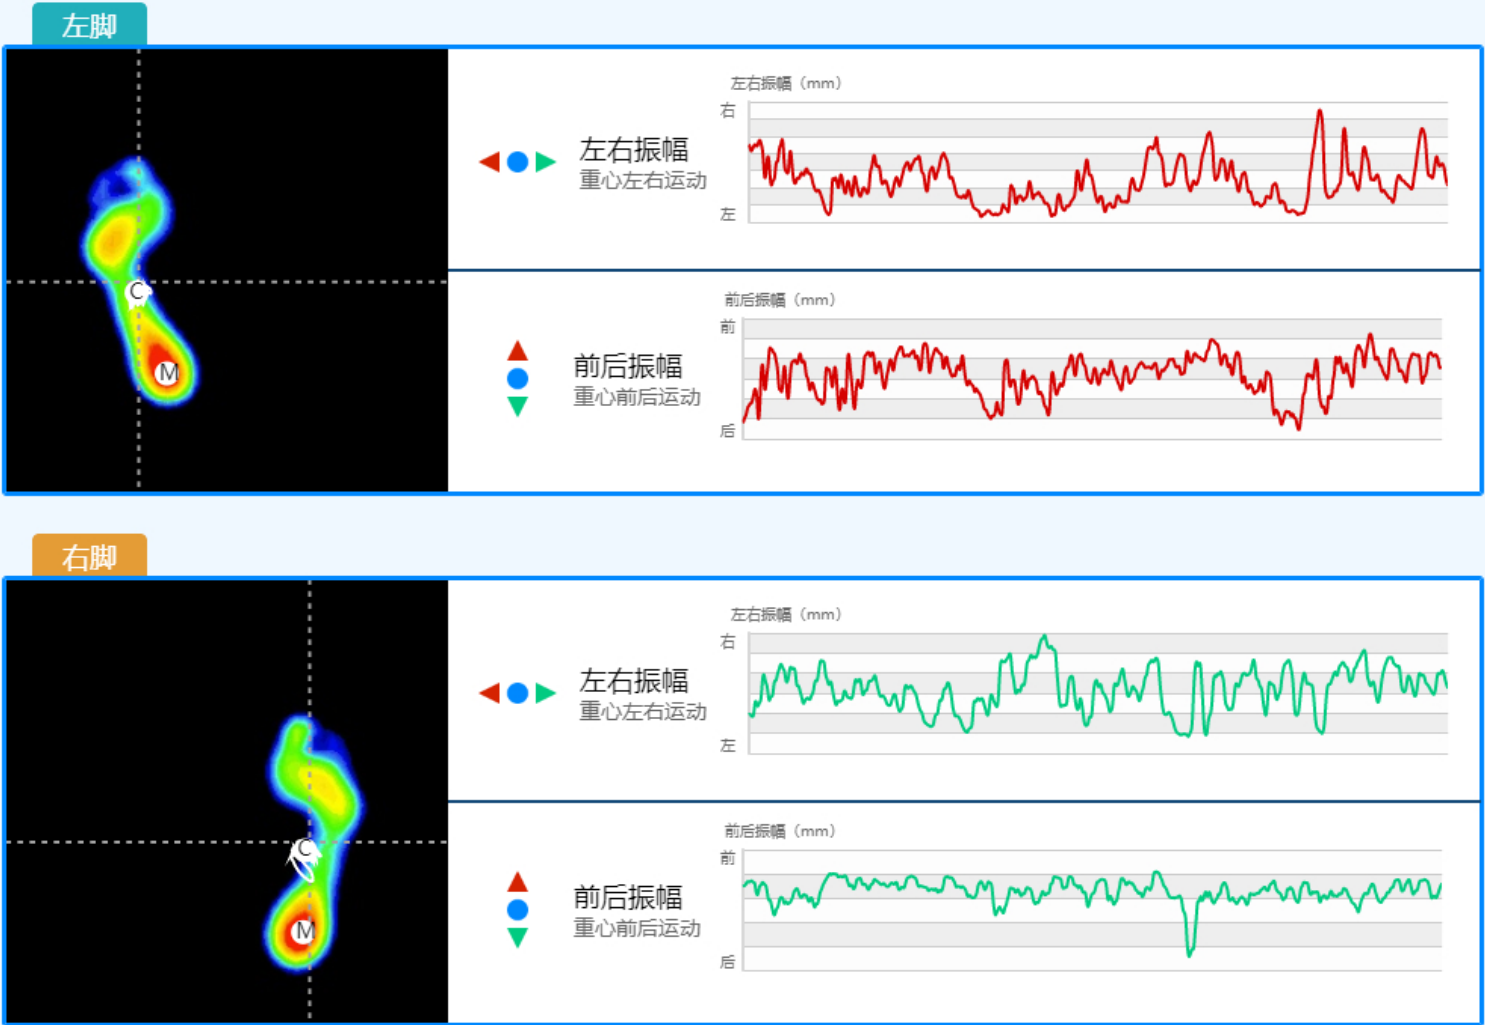

Cop数据

左脚 右脚

|             | 左脚     | 右脚     |
|-------------|--------|--------|
| 平均位置X【mm】   | -1.95  | -4.04  |
| 平均位置Y【mm】   | -9.14  | -7.32  |
| 标准差X【mm】    | 3.62   | 5.16   |
| 标准差Y【mm】    | 4.81   | 4.52   |
| 距离【mm】      | 847.76 | 852.95 |
| 平均速度【mm/ms】 | 0.03   | 0.03   |
| 距离/表面积      | 2.92   | 1.36   |
| 偏心率         | 0.76   | 0.62   |
| 倾斜角度【°】     | -61.88 | -72.68 |

# 平衡报告

宋璐杰 19岁 女 55.0kg 160.0cm 2025-2-26 09:45:41

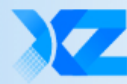

## 报告结论

睁眼  
左右振幅大于参考值  
左右晃动比前后晃动更明显
