# Supplementary material for: Individualized Corrective Training Based on Precision Biomechanical Assessment for the Prevention of Sports Injuries in Adolescents
Source: Research Square preprint supplement (doi:10.21203/rs.3.rs-8426574/v1), 2026-02-02
Supplement: Supplementary file 32 [file 平衡报告-张东琪-20250226102731.pdf › Plantar pressure and gait analysis/aerobics /平衡报告-张东琪-20250226102731.pdf]

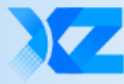

双脚重心变化

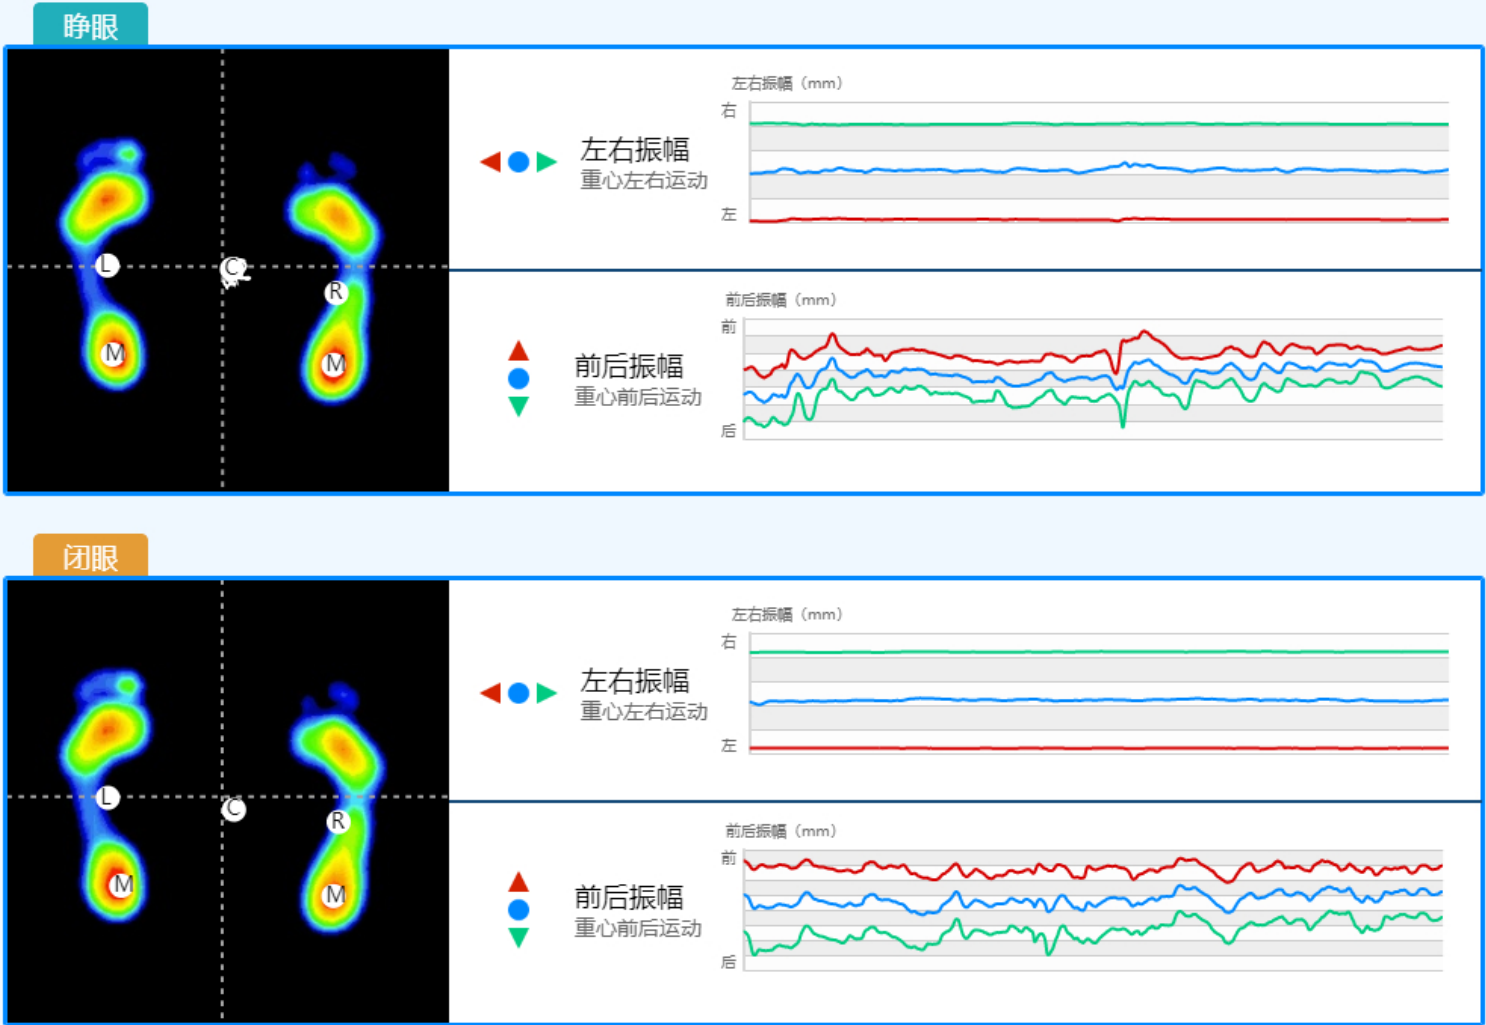

Cop数据

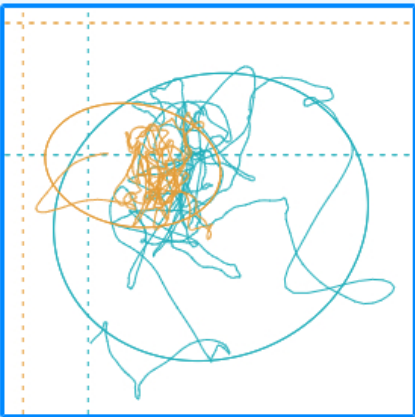

睁眼 闭眼

|             | 睁眼     | 闭眼     |
|-------------|--------|--------|
| 平均位置X【mm】   | 8.06   | 10.28  |
| 平均位置Y【mm】   | -2.41  | -11.65 |
| 标准差X【mm】    | 3.60   | 1.92   |
| 标准差Y【mm】    | 5.28   | 2.17   |
| 距离【mm】      | 361.50 | 204.71 |
| 平均速度【mm/ms】 | 0.01   | 0.01   |
| 距离/表面积      | 0.86   | 2.04   |
| 偏心率         | 0.46   | 0.72   |
| 倾斜角度【°】     | -22.28 | -80.60 |

# 平衡报告

张东琪 20岁 女 57.0kg 165.0cm 2025-2-26 10:26:11

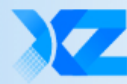

## 报告结论

睁眼  
前后振幅大于参考值  
前后晃动比左右晃动更明显  
闭眼  
身体重心位于右后方，骨盆右旋  
前后晃动比左右晃动更明显
