# Supplementary material for: Individualized Corrective Training Based on Precision Biomechanical Assessment for the Prevention of Sports Injuries in Adolescents
Source: Research Square preprint supplement (doi:10.21203/rs.3.rs-8426574/v1), 2026-02-02
Supplement: Supplementary file 33 [file 平衡报告-张东琪-20250226102855.pdf › Plantar pressure and gait analysis/aerobics /平衡报告-张东琪-20250226102855.pdf]

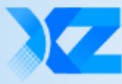

双脚重心变化

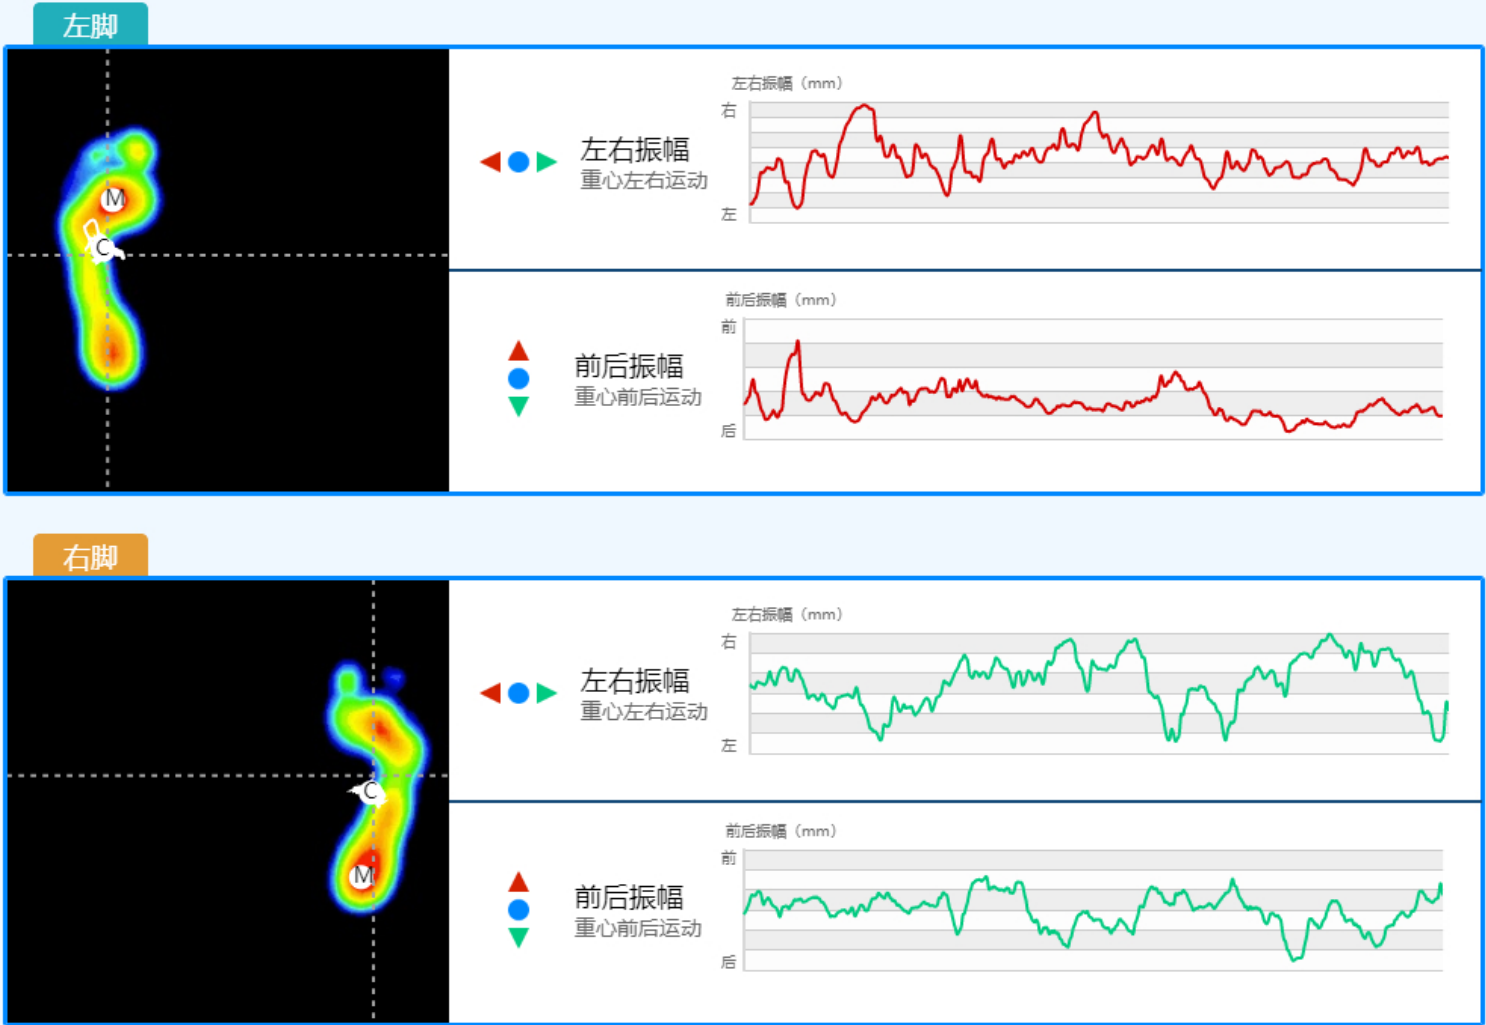

Cop数据

左脚 右脚

|             | 左脚     | 右脚     |
|-------------|--------|--------|
| 平均位置X【mm】   | -3.99  | -2.24  |
| 平均位置Y【mm】   | 4.65   | -15.16 |
| 标准差X【mm】    | 6.11   | 6.39   |
| 标准差Y【mm】    | 5.99   | 4.14   |
| 距离【mm】      | 658.07 | 508.87 |
| 平均速度【mm/ms】 | 0.02   | 0.02   |
| 距离/表面积      | 0.80   | 1.47   |
| 偏心率         | 0.84   | 0.82   |
| 倾斜角度【°】     | -41.17 | -56.94 |

# 平衡报告

张东琪 20岁 女 57.0kg 165.0cm 2025-2-26 10:27:43

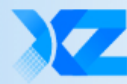

## 报告结论

睁眼  
左右振幅大于参考值  
左右晃动比前后晃动更明显
