# Supplementary material for: Individualized Corrective Training Based on Precision Biomechanical Assessment for the Prevention of Sports Injuries in Adolescents
Source: Research Square preprint supplement (doi:10.21203/rs.3.rs-8426574/v1), 2026-02-02
Supplement: Supplementary file 36 [file 平衡报告-朱梓齐-20250226095754.pdf › Plantar pressure and gait analysis/aerobics /平衡报告-朱梓齐-20250226095754.pdf]

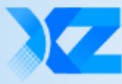

双脚重心变化

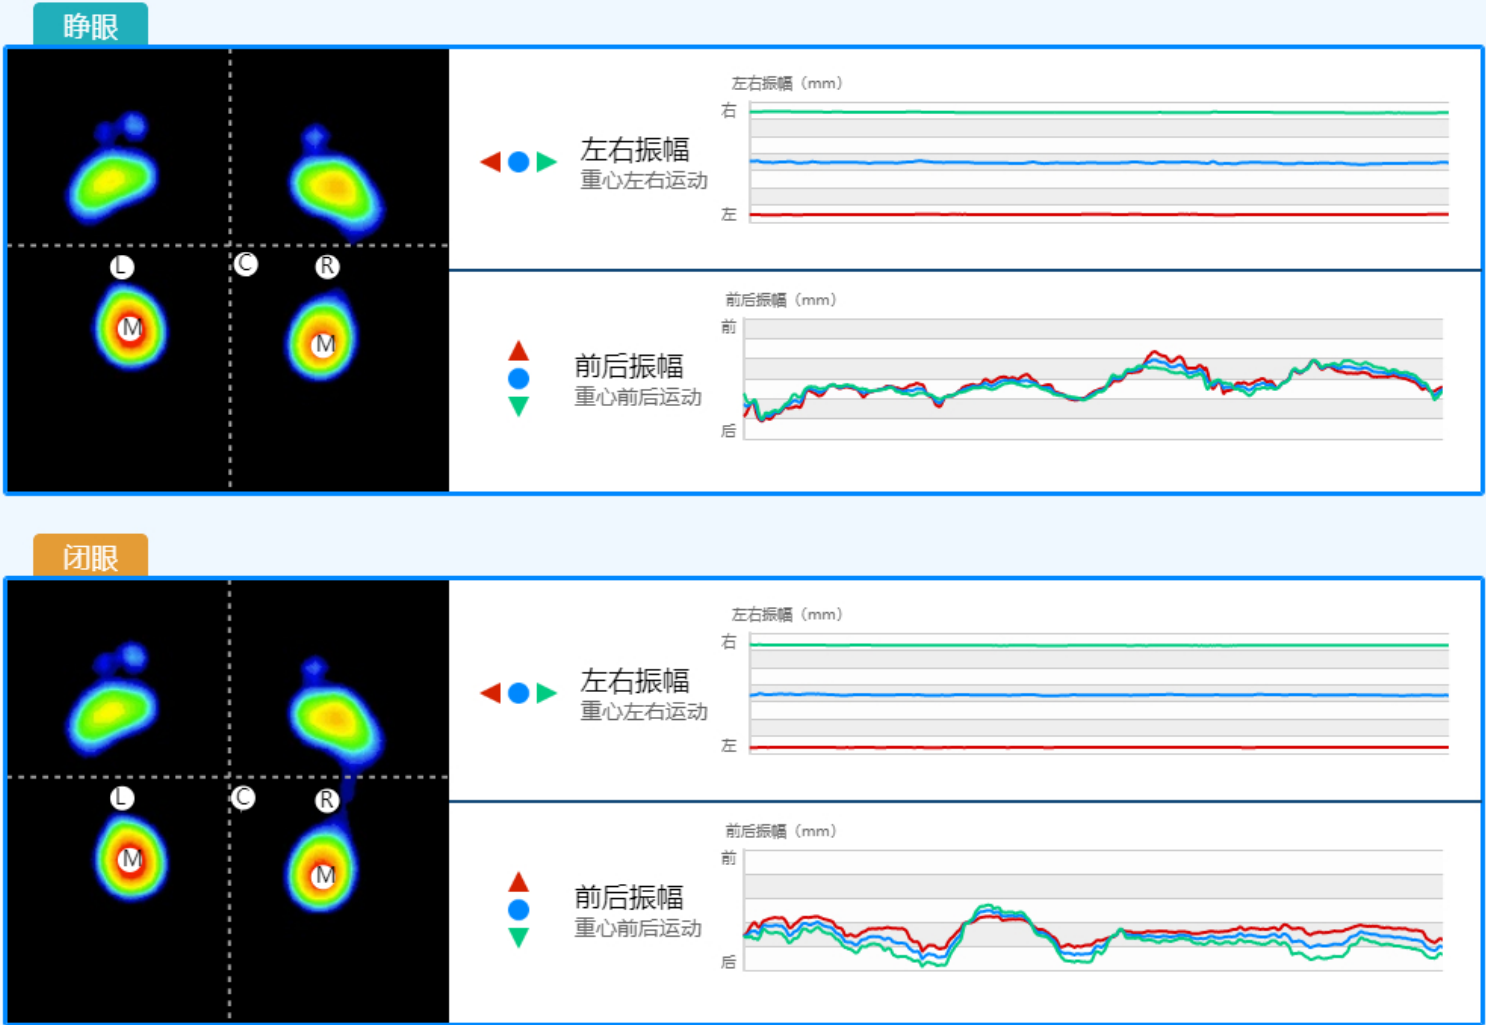

Cop数据

|             | 睁眼     | 闭眼     |
|-------------|--------|--------|
| 平均位置X【mm】   | 13.49  | 11.90  |
| 平均位置Y【mm】   | -16.41 | -18.07 |
| 标准差X【mm】    | 1.13   | 0.64   |
| 标准差Y【mm】    | 3.10   | 2.11   |
| 距离【mm】      | 143.24 | 100.94 |
| 平均速度【mm/ms】 | 0.00   | 0.00   |
| 距离/表面积      | 2.39   | 3.44   |
| 偏心率         | 0.94   | 0.92   |
| 倾斜角度【°】     | -12.92 | -75.06 |

平衡报告

朱梓齐 19岁 女 55.0kg 167.0cm 2025-2-26 09:56:45

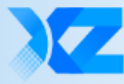

报告结论

睁眼  
身体重心位于右后方，骨盆右旋  
前后晃动比左右晃动更明显  
闭眼  
身体重心位于右后方，骨盆右旋  
前后晃动比左右晃动更明显
