# Supplementary material for: Individualized Corrective Training Based on Precision Biomechanical Assessment for the Prevention of Sports Injuries in Adolescents
Source: Research Square preprint supplement (doi:10.21203/rs.3.rs-8426574/v1), 2026-02-02
Supplement: Supplementary file 37 [file 平衡报告-朱梓齐-20250226095917.pdf › Plantar pressure and gait analysis/aerobics /平衡报告-朱梓齐-20250226095917.pdf]

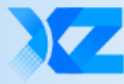

双脚重心变化

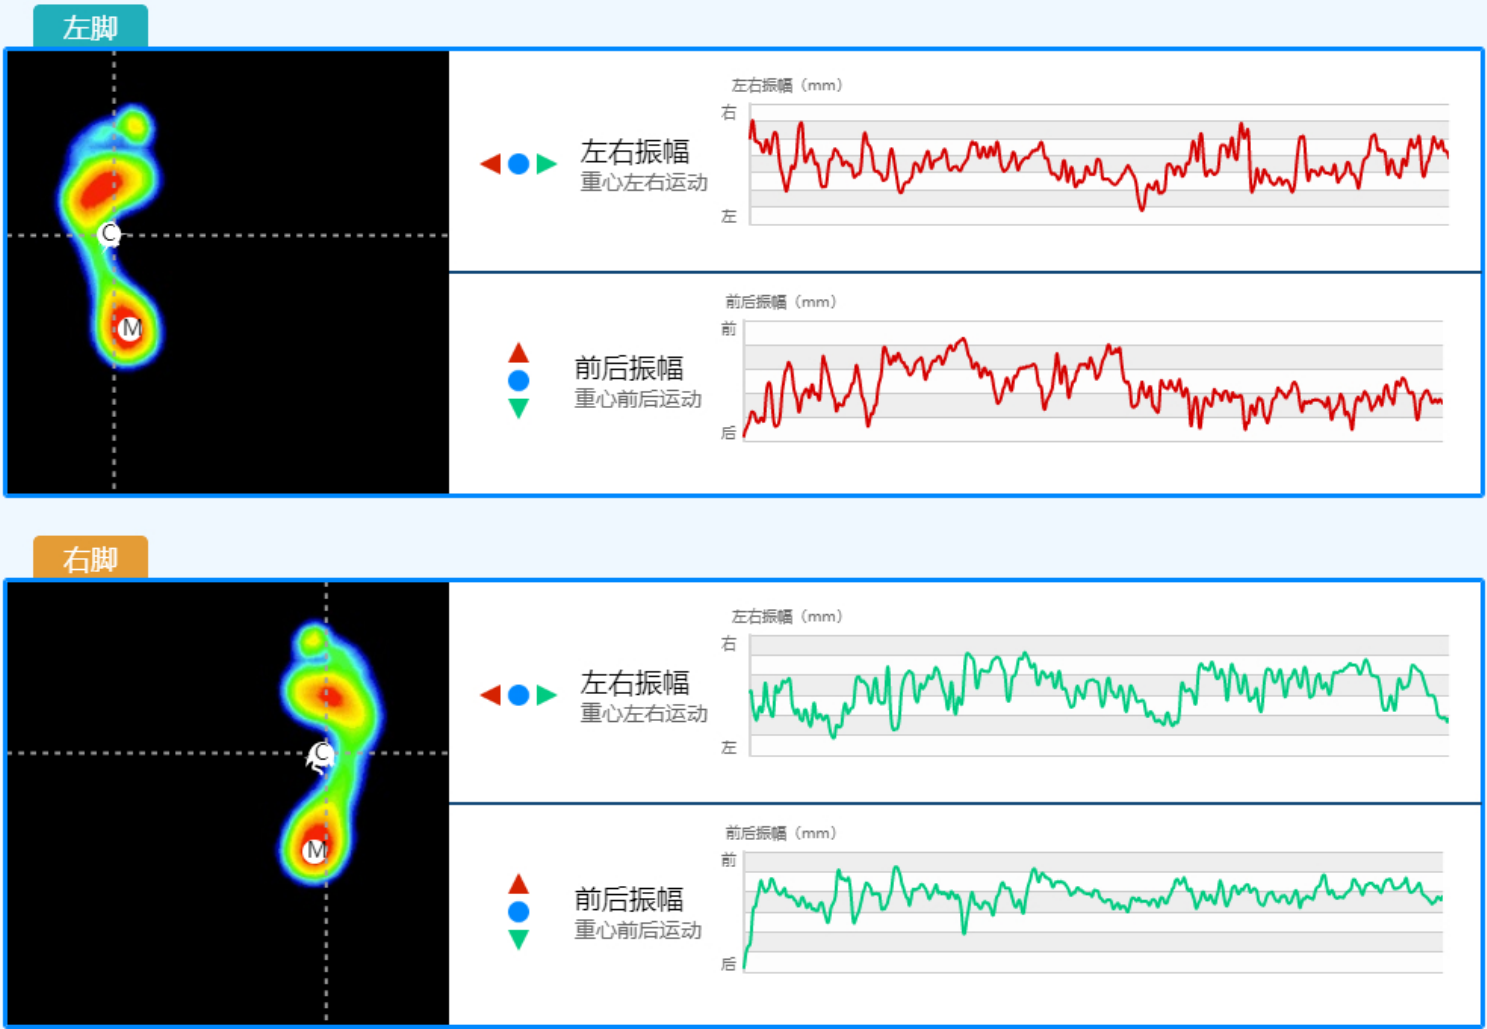

Cop数据

|             | 左脚     | 右脚     |
|-------------|--------|--------|
| 平均位置X【mm】   | -4.56  | -3.60  |
| 平均位置Y【mm】   | 0.95   | -0.80  |
| 标准差X【mm】    | 2.75   | 4.64   |
| 标准差Y【mm】    | 4.21   | 2.94   |
| 距离【mm】      | 657.49 | 759.62 |
| 平均速度【mm/ms】 | 0.02   | 0.03   |
| 距离/表面积      | 2.63   | 2.13   |
| 偏心率         | 0.65   | 0.17   |
| 倾斜角度【°】     | -13.28 | -42.55 |

平衡报告

朱梓齐 19岁 女 55.0kg 167.0cm 2025-2-26 09:58:06

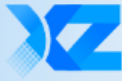

报告结论

睁眼  
左右晃动比前后晃动更明显
