# Supplementary material for: Individualized Corrective Training Based on Precision Biomechanical Assessment for the Prevention of Sports Injuries in Adolescents
Source: Research Square preprint supplement (doi:10.21203/rs.3.rs-8426574/v1), 2026-02-02
Supplement: Supplementary file 38 [file 平衡报告-段瑶-20250226164729.pdf › Plantar pressure and gait analysis/aerobics /平衡报告-段瑶-20250226164729.pdf]

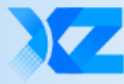

双脚重心变化

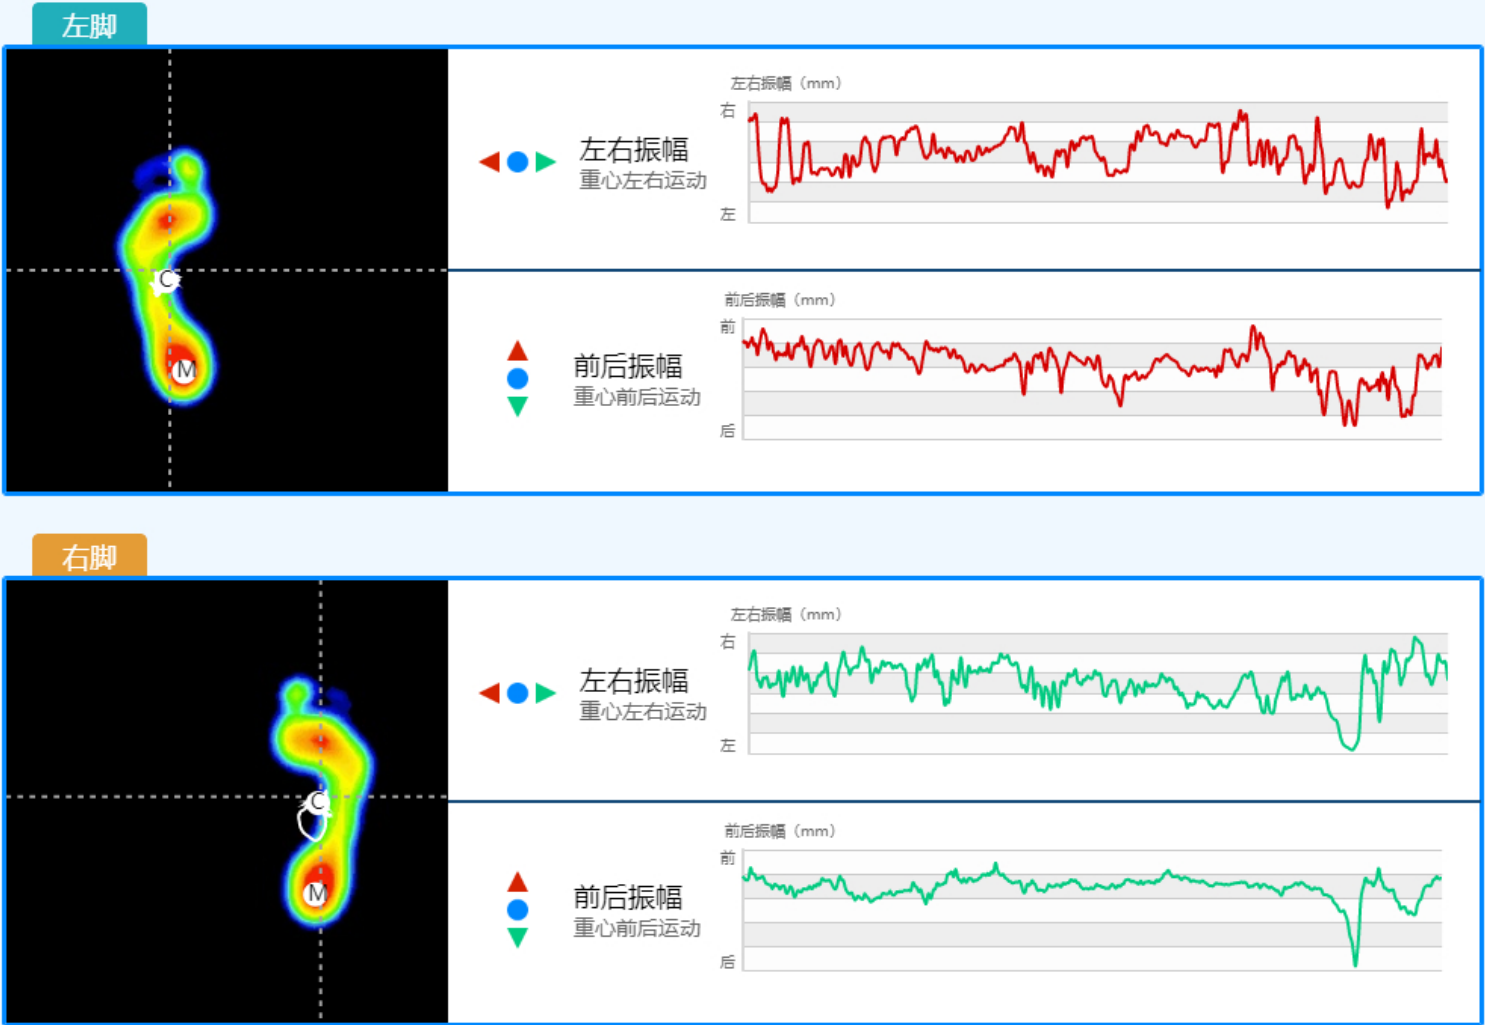

Cop数据

左脚 右脚

|             | 左脚     | 右脚     |
|-------------|--------|--------|
| 平均位置X【mm】   | -3.03  | -2.36  |
| 平均位置Y【mm】   | -9.61  | -5.70  |
| 标准差X【mm】    | 4.74   | 4.74   |
| 标准差Y【mm】    | 3.64   | 4.76   |
| 距离【mm】      | 812.88 | 749.18 |
| 平均速度【mm/ms】 | 0.03   | 0.03   |
| 距离/表面积      | 2.29   | 0.86   |
| 偏心率         | 0.65   | 0.77   |
| 倾斜角度【°】     | -25.77 | -57.55 |

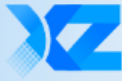

报告结论

睁眼  
前后晃动比左右晃动更明显
