# Supplementary material for: Individualized Corrective Training Based on Precision Biomechanical Assessment for the Prevention of Sports Injuries in Adolescents
Source: Research Square preprint supplement (doi:10.21203/rs.3.rs-8426574/v1), 2026-02-02
Supplement: Supplementary file 42 [file 平衡报告-王军艳-20250303210410.pdf › Plantar pressure and gait analysis/aerobics /平衡报告-王军艳-20250303210410.pdf]

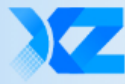

双脚重心变化

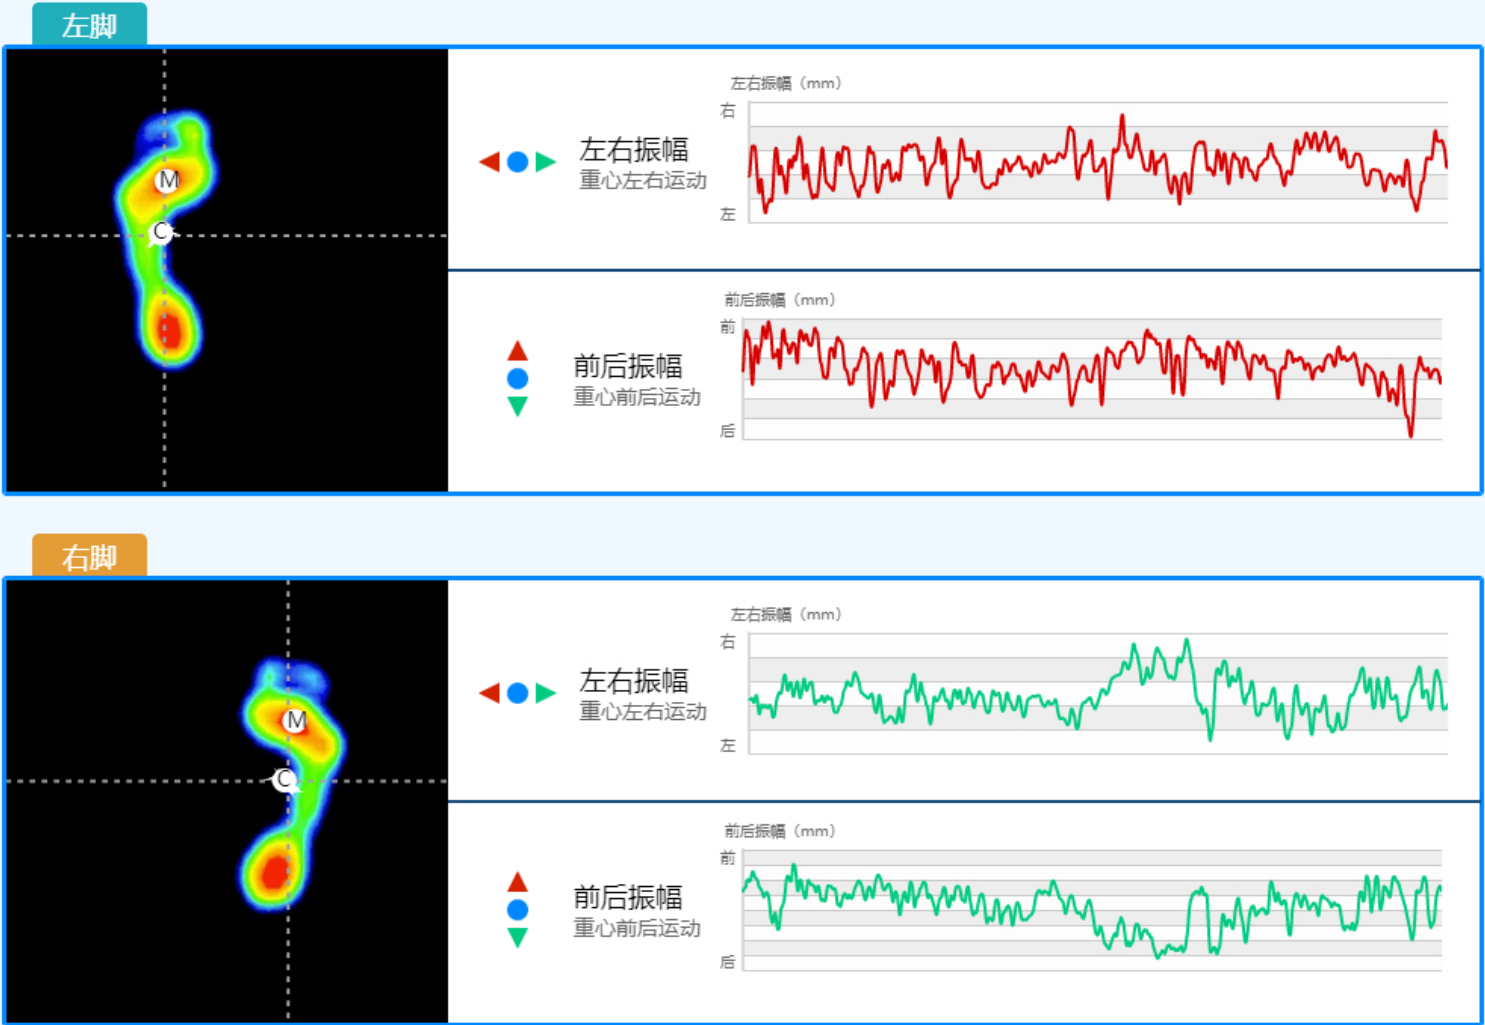

Cop数据

左脚 右脚

|             | 左脚     | 右脚     |
|-------------|--------|--------|
| 平均位置X【mm】   | -3.13  | -3.12  |
| 平均位置Y【mm】   | 2.02   | 0.63   |
| 标准差X【mm】    | 3.48   | 3.76   |
| 标准差Y【mm】    | 2.64   | 3.97   |
| 距离【mm】      | 790.74 | 750.40 |
| 平均速度【mm/ms】 | 0.03   | 0.03   |
| 距离/表面积      | 3.28   | 3.47   |
| 偏心率         | 0.80   | 0.81   |
| 倾斜角度【°】     | -27.92 | -33.04 |

平衡报告

王军艳 19岁 女 55.0kg 165.0cm 2025-2-26 15:58:05

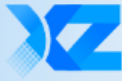

报告结论

睁眼  
前后晃动比左右晃动更明显
