# Supplementary material for: Individualized Corrective Training Based on Precision Biomechanical Assessment for the Prevention of Sports Injuries in Adolescents
Source: Research Square preprint supplement (doi:10.21203/rs.3.rs-8426574/v1), 2026-02-02
Supplement: Supplementary file 45 [file 平衡报告-王思奕-20250226101115.pdf › Plantar pressure and gait analysis/aerobics /平衡报告-王思奕-20250226101115.pdf]

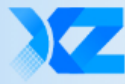

双脚重心变化

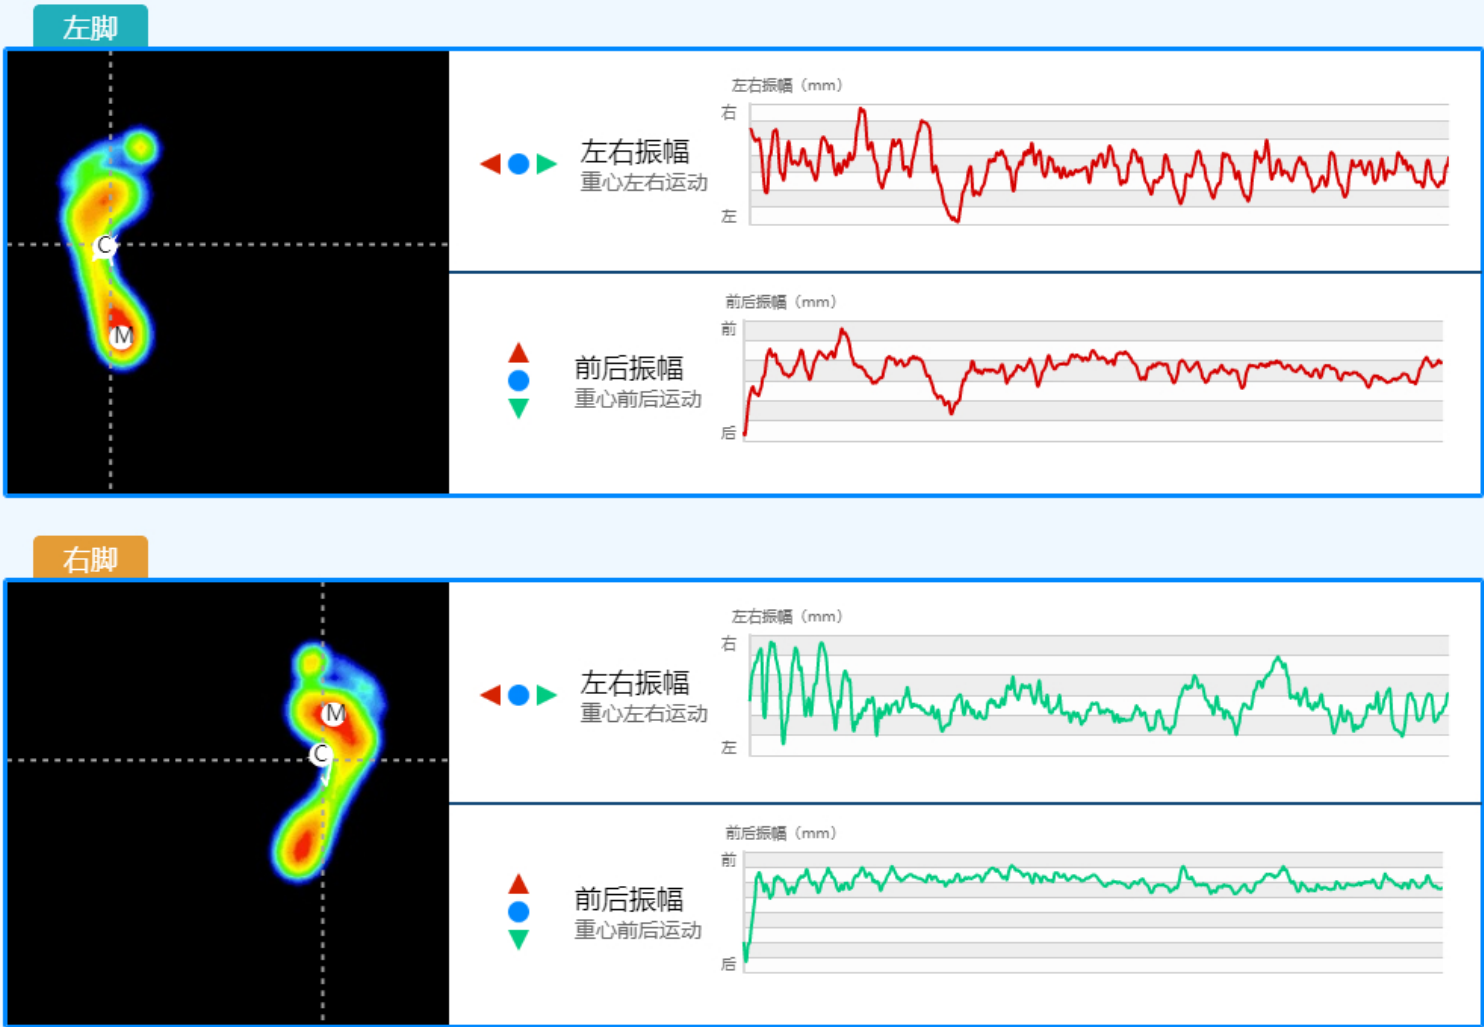

Cop数据

左脚 右脚

|             | 左脚     | 右脚     |
|-------------|--------|--------|
| 平均位置X【mm】   | -5.19  | -1.20  |
| 平均位置Y【mm】   | -2.28  | 4.81   |
| 标准差X【mm】    | 3.14   | 2.83   |
| 标准差Y【mm】    | 3.15   | 3.18   |
| 距离【mm】      | 577.03 | 571.97 |
| 平均速度【mm/ms】 | 0.02   | 0.02   |
| 距离/表面积      | 1.79   | 1.64   |
| 偏心率         | 0.66   | 0.90   |
| 倾斜角度【°】     | -71.92 | -16.44 |

# 平衡报告

王思奕 18岁 女 47.0kg 158.0cm 2025-2-26 10:10:06

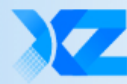

## 报告结论

睁眼  
前后晃动比左右晃动更明显
