# Supplementary material for: Individualized Corrective Training Based on Precision Biomechanical Assessment for the Prevention of Sports Injuries in Adolescents
Source: Research Square preprint supplement (doi:10.21203/rs.3.rs-8426574/v1), 2026-02-02
Supplement: Supplementary file 46 [file 平衡报告-王雅楠-20250226165004.pdf › Plantar pressure and gait analysis/aerobics /平衡报告-王雅楠-20250226165004.pdf]

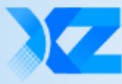

双脚重心变化

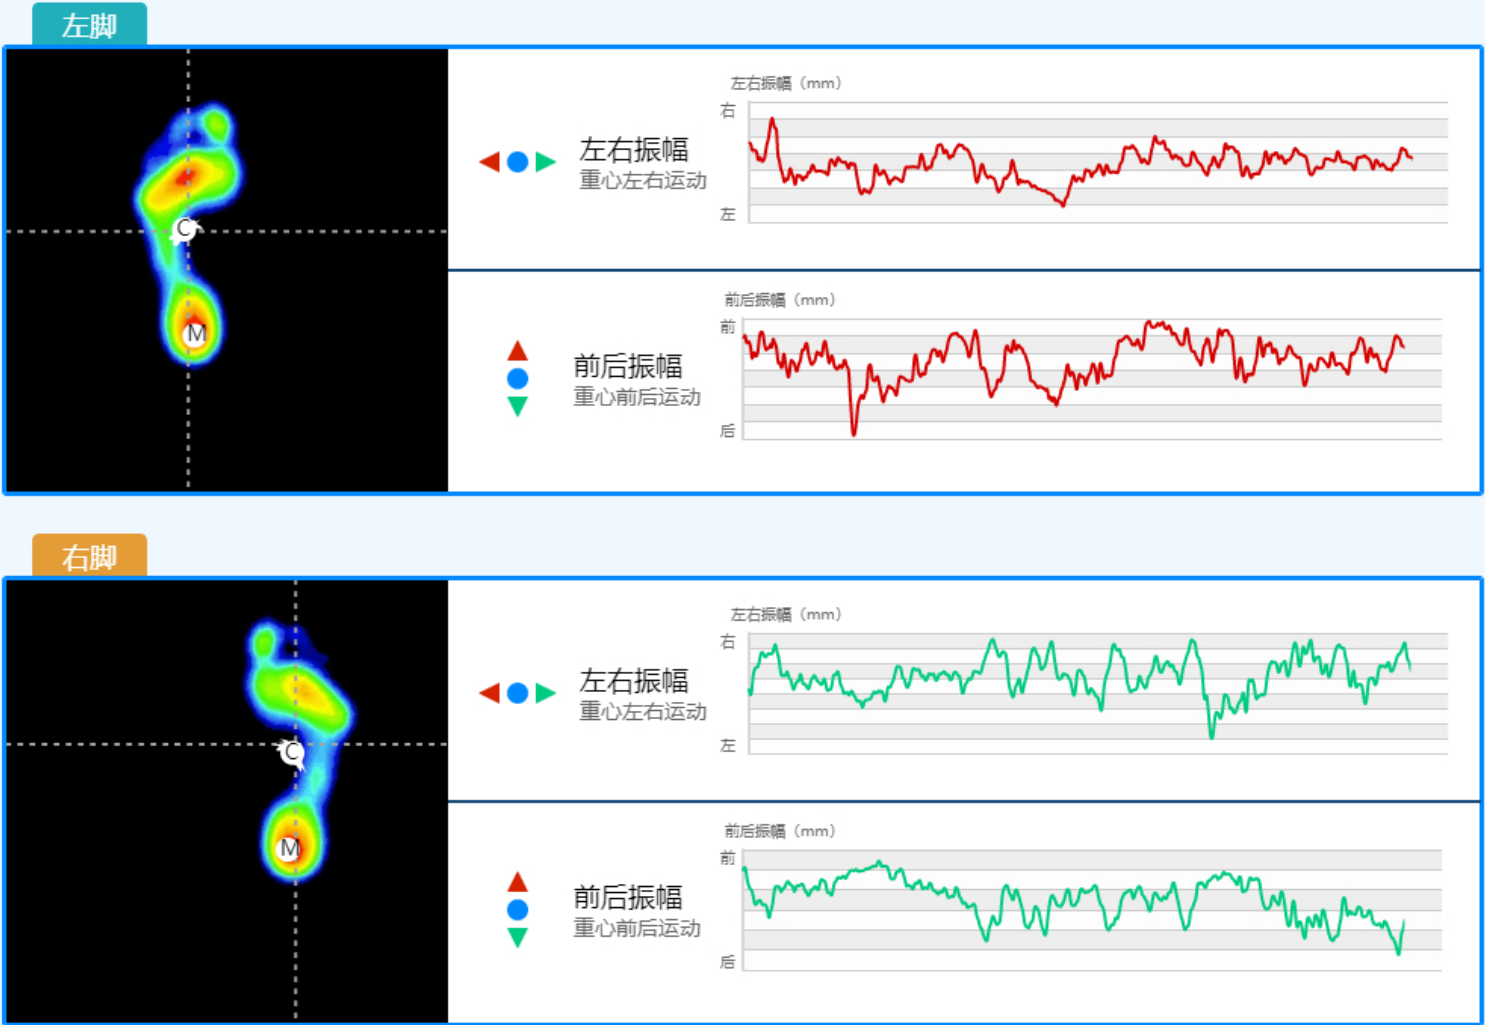

Cop数据

|             | 左脚     | 右脚     |
|-------------|--------|--------|
| 平均位置X【mm】   | -3.62  | -2.70  |
| 平均位置Y【mm】   | 1.68   | -7.45  |
| 标准差X【mm】    | 3.96   | 3.62   |
| 标准差Y【mm】    | 3.36   | 4.68   |
| 距离【mm】      | 547.98 | 579.39 |
| 平均速度【mm/ms】 | 0.02   | 0.02   |
| 距离/表面积      | 2.22   | 2.50   |
| 偏心率         | 0.89   | 0.89   |
| 倾斜角度【°】     | -35.72 | -48.81 |

平衡报告

王雅楠 20岁 女 53.0kg 168.0cm 2025-2-26 16:13:43

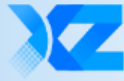

报告结论

睁眼  
前后晃动比左右晃动更明显
