# Supplementary material for: Individualized Corrective Training Based on Precision Biomechanical Assessment for the Prevention of Sports Injuries in Adolescents
Source: Research Square preprint supplement (doi:10.21203/rs.3.rs-8426574/v1), 2026-02-02
Supplement: Supplementary file 47 [file 平衡报告-王雅楠-20250226165014.pdf › Plantar pressure and gait analysis/aerobics /平衡报告-王雅楠-20250226165014.pdf]

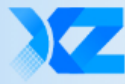

双脚重心变化

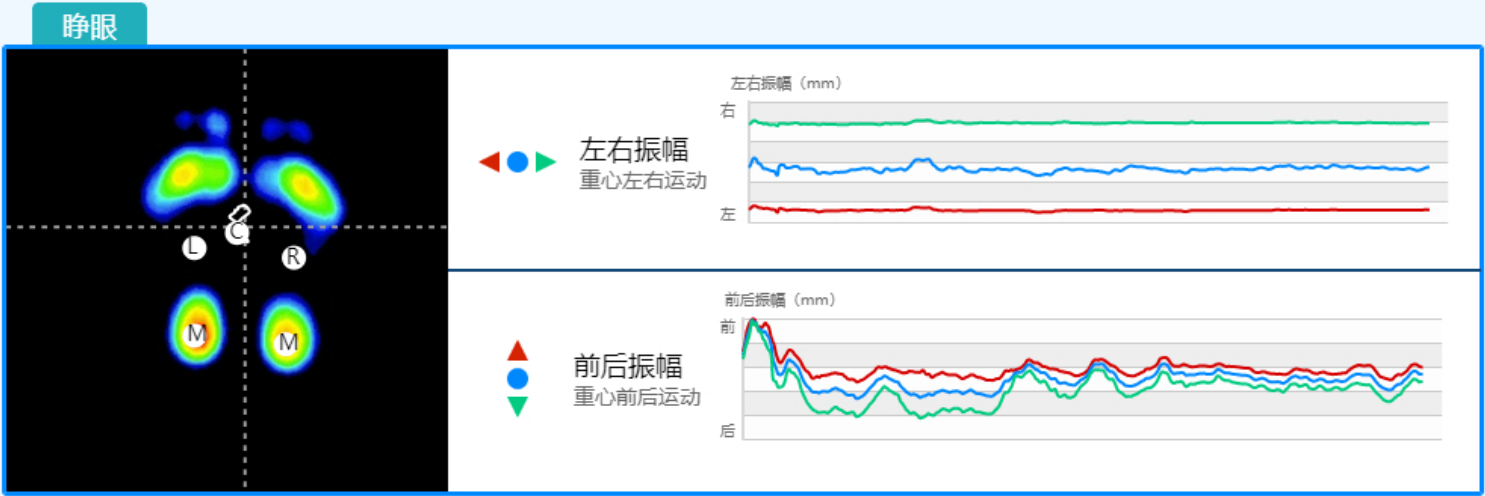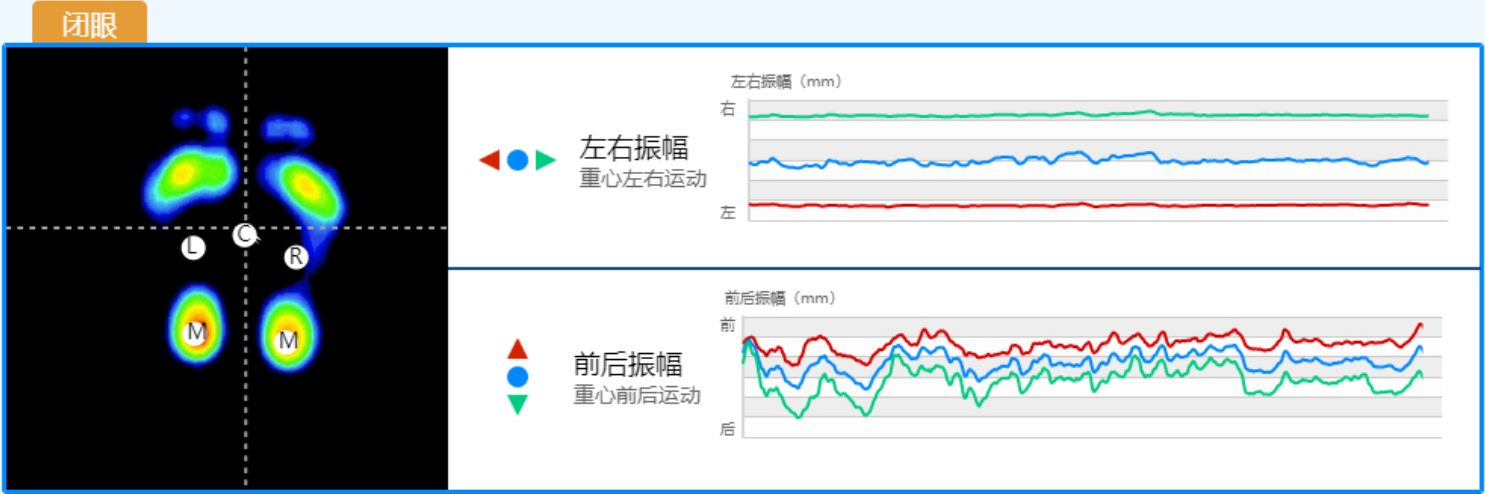

Cop数据

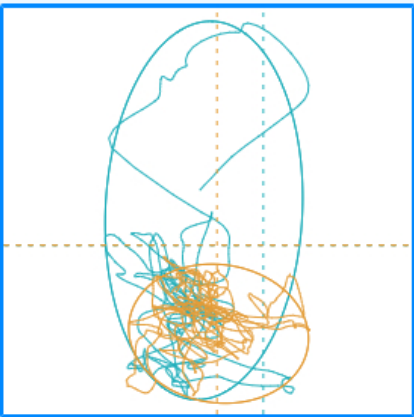

— 睁眼 — 闭眼

|             | 睁眼     | 闭眼     |
|-------------|--------|--------|
| 平均位置X【mm】   | -6.90  | -0.90  |
| 平均位置Y【mm】   | -5.00  | -6.41  |
| 标准差X【mm】    | 2.76   | 3.20   |
| 标准差Y【mm】    | 5.41   | 2.45   |
| 距离【mm】      | 317.76 | 315.82 |
| 平均速度【mm/ms】 | 0.01   | 0.01   |
| 距离/表面积      | 0.72   | 2.15   |
| 偏心率         | 0.86   | 0.64   |
| 倾斜角度【°】     | -87.22 | -81.92 |

# 平衡报告

王雅楠 20岁 女 53.0kg 168.0cm 2025-2-26 16:12:27

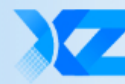

## 报告结论

睁眼  
前后振幅大于参考值  
前后晃动比左右晃动更明显  
闭眼  
左右晃动比前后晃动更明显
