# Supplementary material for: Individualized Corrective Training Based on Precision Biomechanical Assessment for the Prevention of Sports Injuries in Adolescents
Source: Research Square preprint supplement (doi:10.21203/rs.3.rs-8426574/v1), 2026-02-02
Supplement: Supplementary file 50 [file 平衡报告-蒋天虹-20250226140843.pdf › Plantar pressure and gait analysis/aerobics /平衡报告-蒋天虹-20250226140843.pdf]

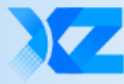

双脚重心变化

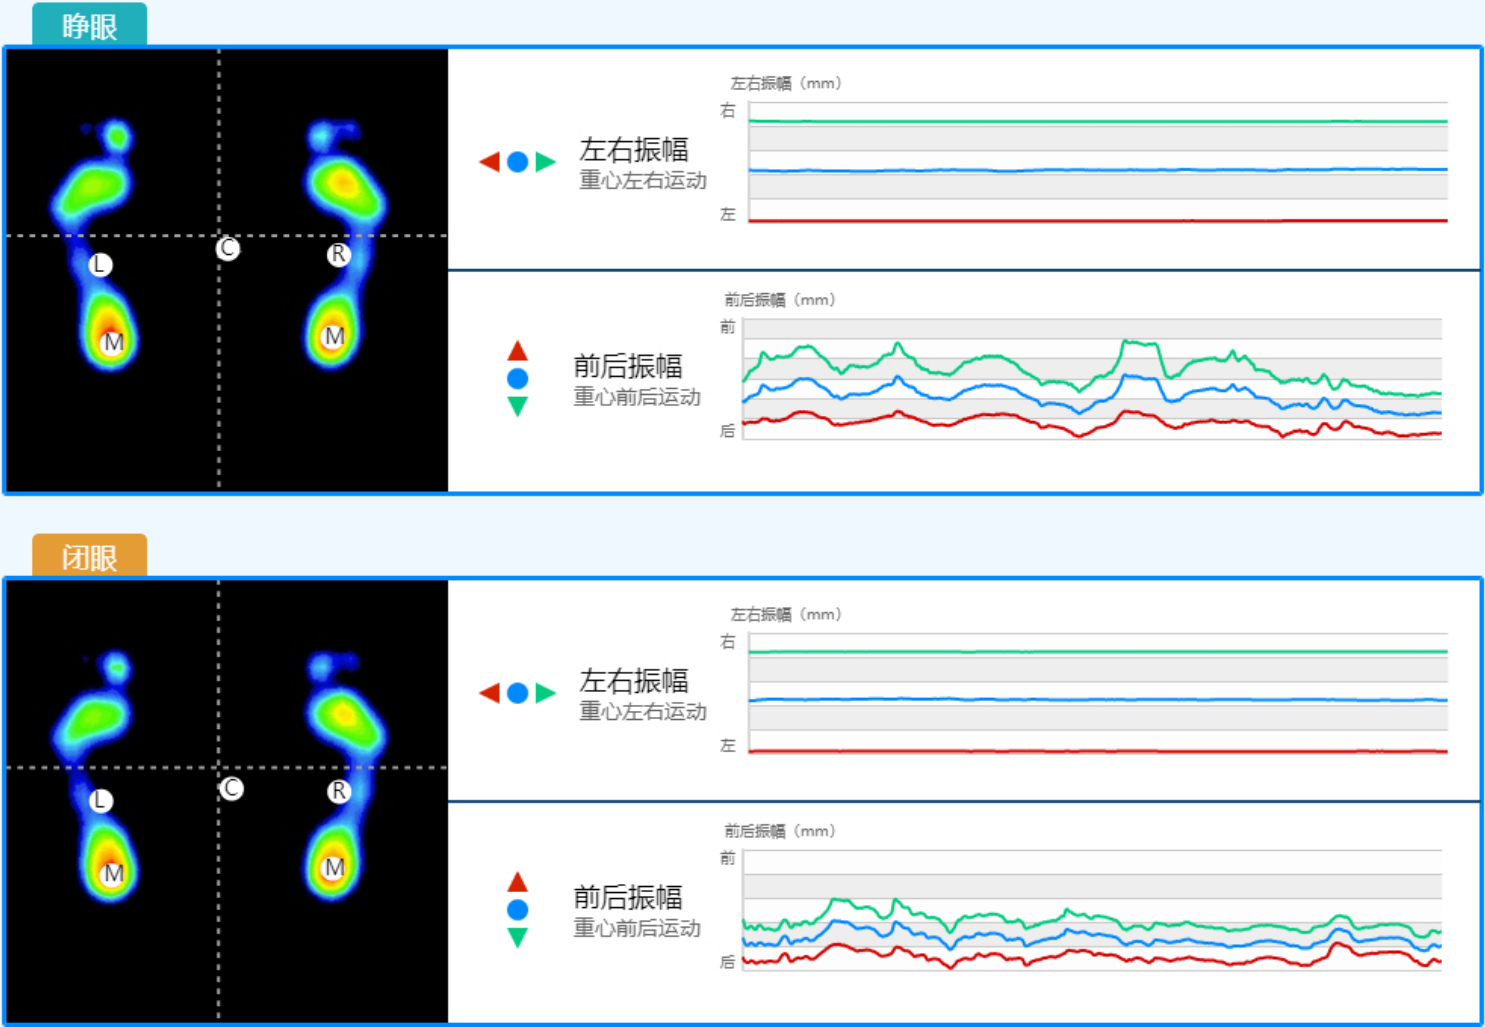

Cop数据

— 睁眼 — 闭眼

|             | 睁眼     | 闭眼     |
|-------------|--------|--------|
| 平均位置X【mm】   | 7.90   | 11.55  |
| 平均位置Y【mm】   | -11.61 | -18.50 |
| 标准差X【mm】    | 1.25   | 0.81   |
| 标准差Y【mm】    | 1.54   | 1.31   |
| 距离【mm】      | 90.16  | 98.60  |
| 平均速度【mm/ms】 | 0.00   | 0.00   |
| 距离/表面积      | 4.68   | 4.65   |
| 偏心率         | 0.80   | 0.76   |
| 倾斜角度【°】     | -22.52 | -64.26 |

# 平衡报告

蒋天虹 20岁 女 42.0kg 158.0cm 2025-2-26 14:07:36

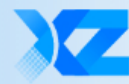

## 报告结论

睁眼  
前后晃动比左右晃动更明显  
闭眼  
身体重心位于右后方，骨盆右旋  
前后晃动比左右晃动更明显
