# Supplementary material for: Individualized Corrective Training Based on Precision Biomechanical Assessment for the Prevention of Sports Injuries in Adolescents
Source: Research Square preprint supplement (doi:10.21203/rs.3.rs-8426574/v1), 2026-02-02
Supplement: Supplementary file 51 [file 平衡报告-蒋天虹-20250226141000.pdf › Plantar pressure and gait analysis/aerobics /平衡报告-蒋天虹-20250226141000.pdf]

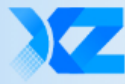

双脚重心变化

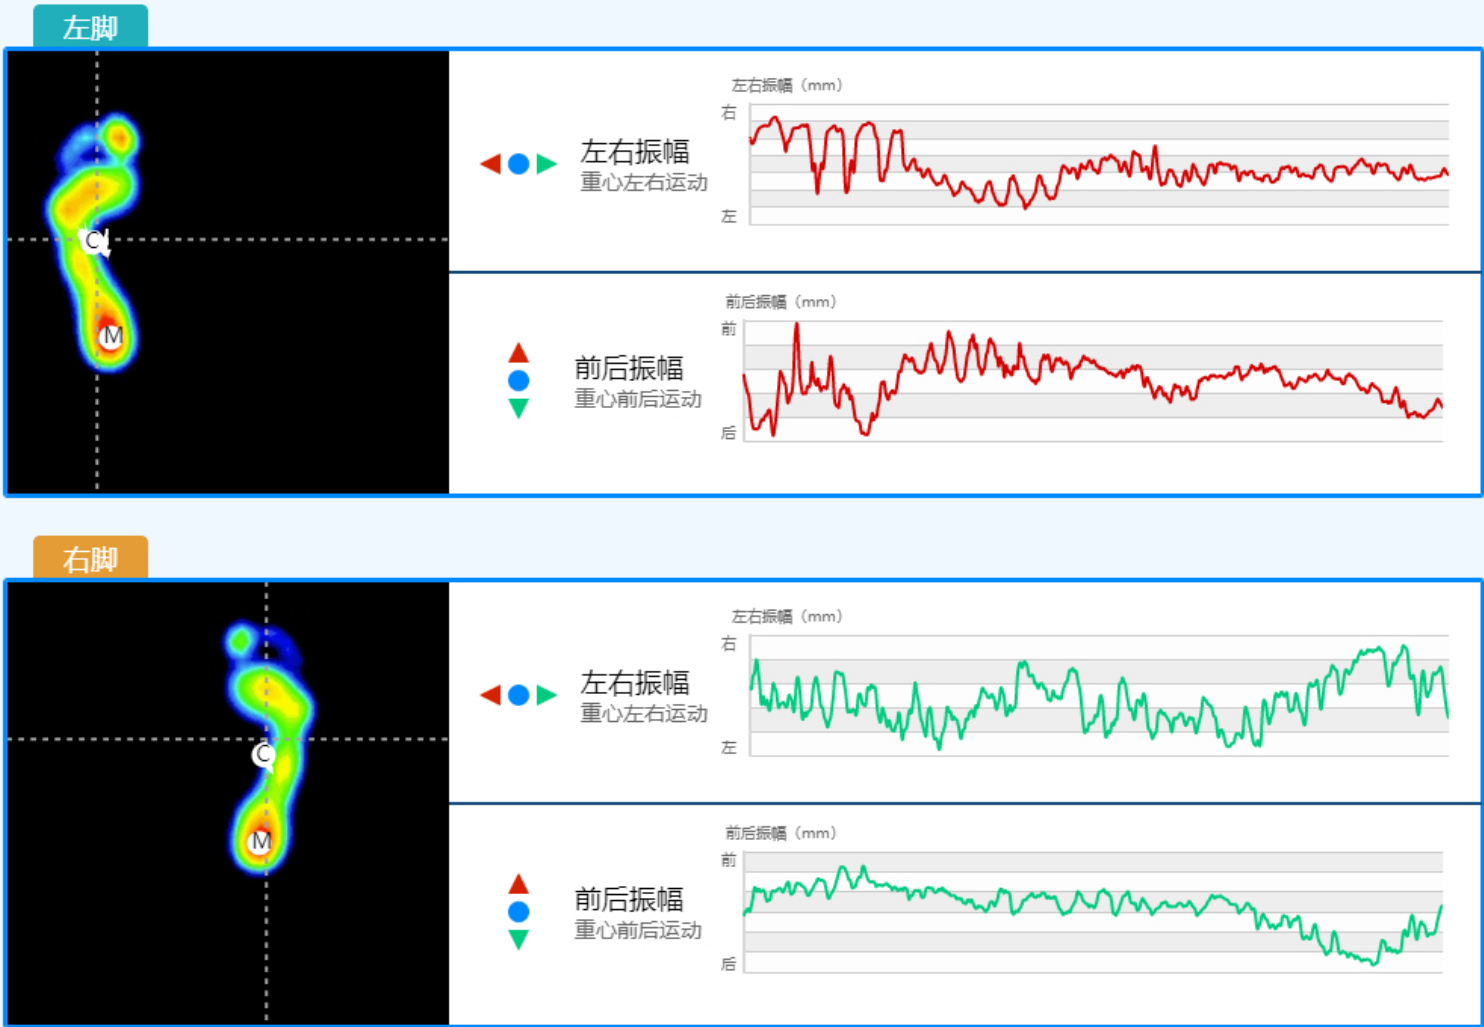

Cop数据

|             | 左脚     | 右脚     |
|-------------|--------|--------|
| 平均位置X【mm】   | -3.64  | -2.22  |
| 平均位置Y【mm】   | -2.58  | -13.99 |
| 标准差X【mm】    | 5.75   | 2.92   |
| 标准差Y【mm】    | 4.13   | 5.37   |
| 距离【mm】      | 684.95 | 474.48 |
| 平均速度【mm/ms】 | 0.02   | 0.02   |
| 距离/表面积      | 1.47   | 2.27   |
| 偏心率         | 0.40   | 0.92   |
| 倾斜角度【°】     | -4.75  | -14.24 |

平衡报告

蒋天虹 20岁 女 42.0kg 158.0cm 2025-2-26 14:08:54

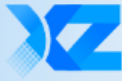

报告结论

睁眼  
前后振幅大于参考值  
前后晃动比左右晃动更明显
