# Supplementary material for: Individualized Corrective Training Based on Precision Biomechanical Assessment for the Prevention of Sports Injuries in Adolescents
Source: Research Square preprint supplement (doi:10.21203/rs.3.rs-8426574/v1), 2026-02-02
Supplement: Supplementary file 53 [file 平衡报告-陶奕霖-20250226105451.pdf › Plantar pressure and gait analysis/aerobics /平衡报告-陶奕霖-20250226105451.pdf]

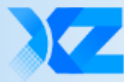

双脚重心变化

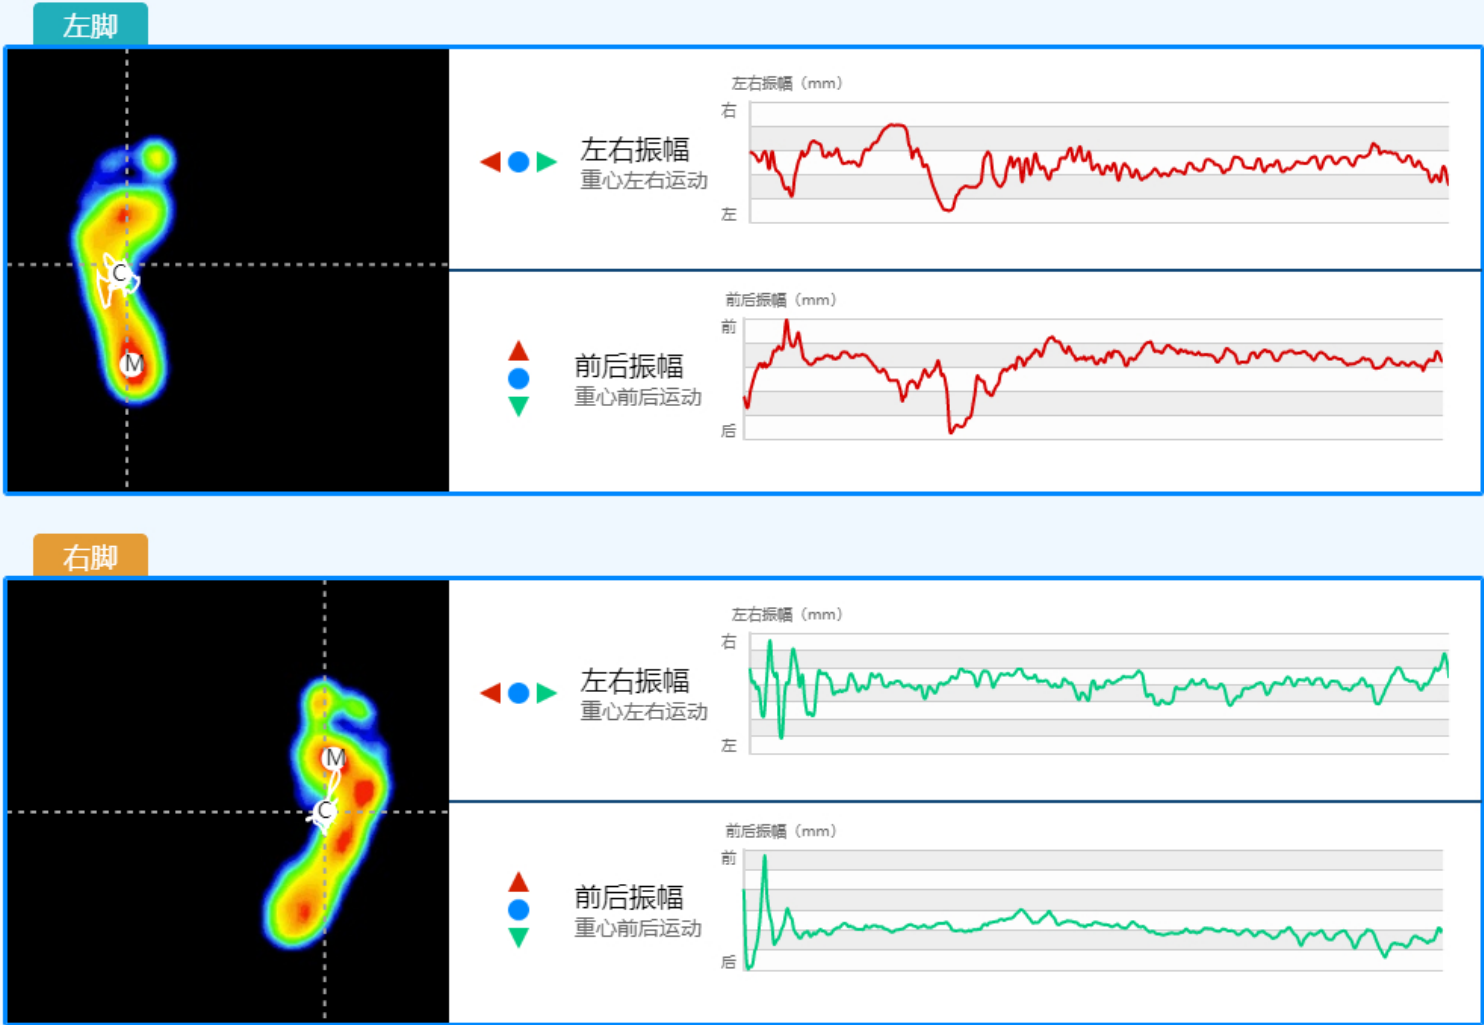

Cop数据

左脚 右脚

|             | 左脚     | 右脚     |
|-------------|--------|--------|
| 平均位置X【mm】   | -6.03  | 0.12   |
| 平均位置Y【mm】   | -8.42  | 0.02   |
| 标准差X【mm】    | 6.09   | 3.13   |
| 标准差Y【mm】    | 7.03   | 5.03   |
| 距离【mm】      | 711.23 | 614.84 |
| 平均速度【mm/ms】 | 0.02   | 0.02   |
| 距离/表面积      | 0.58   | 0.70   |
| 偏心率         | 0.28   | 0.92   |
| 倾斜角度【°】     | -30.68 | -59.87 |

# 平衡报告

陶奕霖 20岁 女 57.0kg 165.0cm 2025-2-26 10:53:46

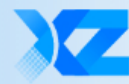

## 报告结论

睁眼  
前后振幅大于参考值  
前后晃动比左右晃动更明显
