# Supplementary material for: Individualized Corrective Training Based on Precision Biomechanical Assessment for the Prevention of Sports Injuries in Adolescents
Source: Research Square preprint supplement (doi:10.21203/rs.3.rs-8426574/v1), 2026-02-02
Supplement: Supplementary file 54 [file 平衡报告-马柯辉-20250226095148.pdf › Plantar pressure and gait analysis/aerobics /平衡报告-马柯辉-20250226095148.pdf]

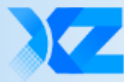

双脚重心变化

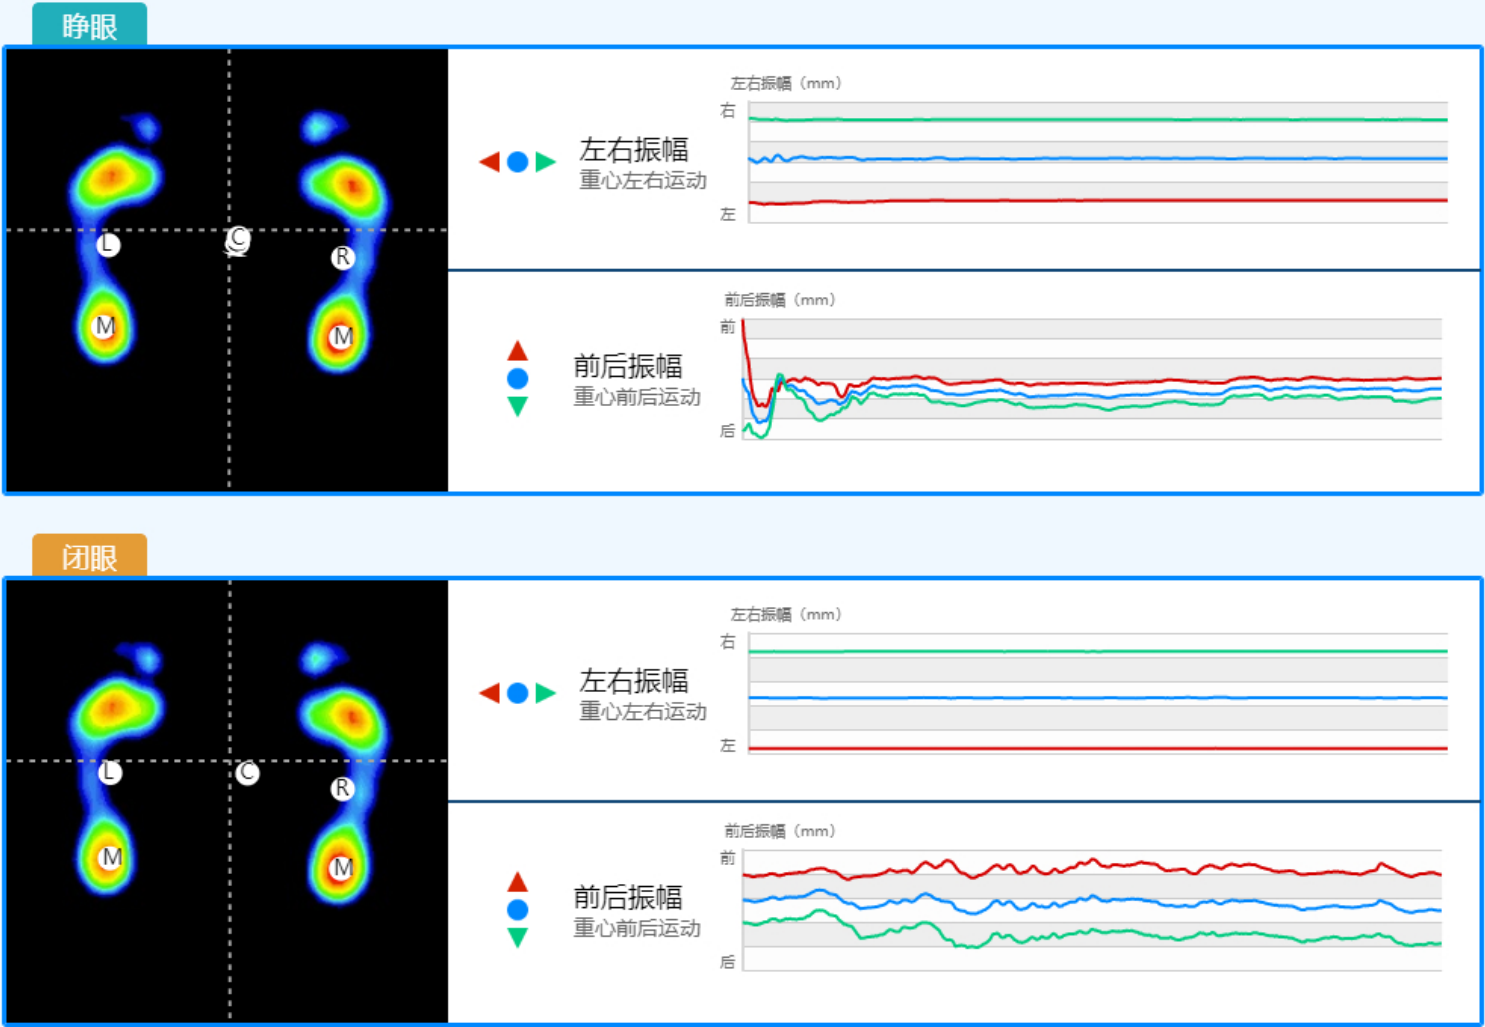

Cop数据

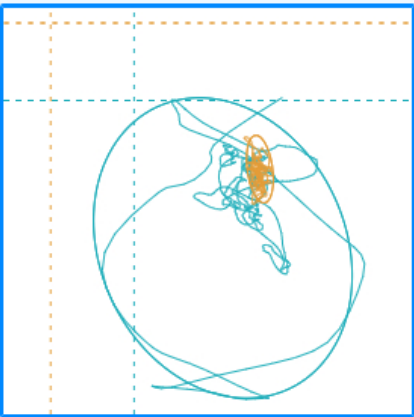

— 睁眼 — 闭眼

|             | 睁眼     | 闭眼     |
|-------------|--------|--------|
| 平均位置X【mm】   | 8.38   | 15.25  |
| 平均位置Y【mm】   | -6.88  | -11.15 |
| 标准差X【mm】    | 1.72   | 0.39   |
| 标准差Y【mm】    | 3.06   | 1.00   |
| 距离【mm】      | 210.66 | 73.32  |
| 平均速度【mm/ms】 | 0.01   | 0.00   |
| 距离/表面积      | 0.65   | 10.18  |
| 偏心率         | 0.62   | 0.93   |
| 倾斜角度【°】     | -24.81 | -7.76  |

# 平衡报告

马柯辉 19岁 女 48.0kg 158.0cm 2025-2-26 09:50:37

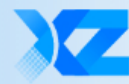

## 报告结论

睁眼  
前后晃动比左右晃动更明显  
闭眼  
身体重心位于右后方，骨盆右旋  
前后晃动比左右晃动更明显
