# Supplementary material for: Individualized Corrective Training Based on Precision Biomechanical Assessment for the Prevention of Sports Injuries in Adolescents
Source: Research Square preprint supplement (doi:10.21203/rs.3.rs-8426574/v1), 2026-02-02
Supplement: Supplementary file 55 [file 平衡报告-马柯辉-20250226095312.pdf › Plantar pressure and gait analysis/aerobics /平衡报告-马柯辉-20250226095312.pdf]

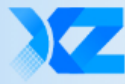

双脚重心变化

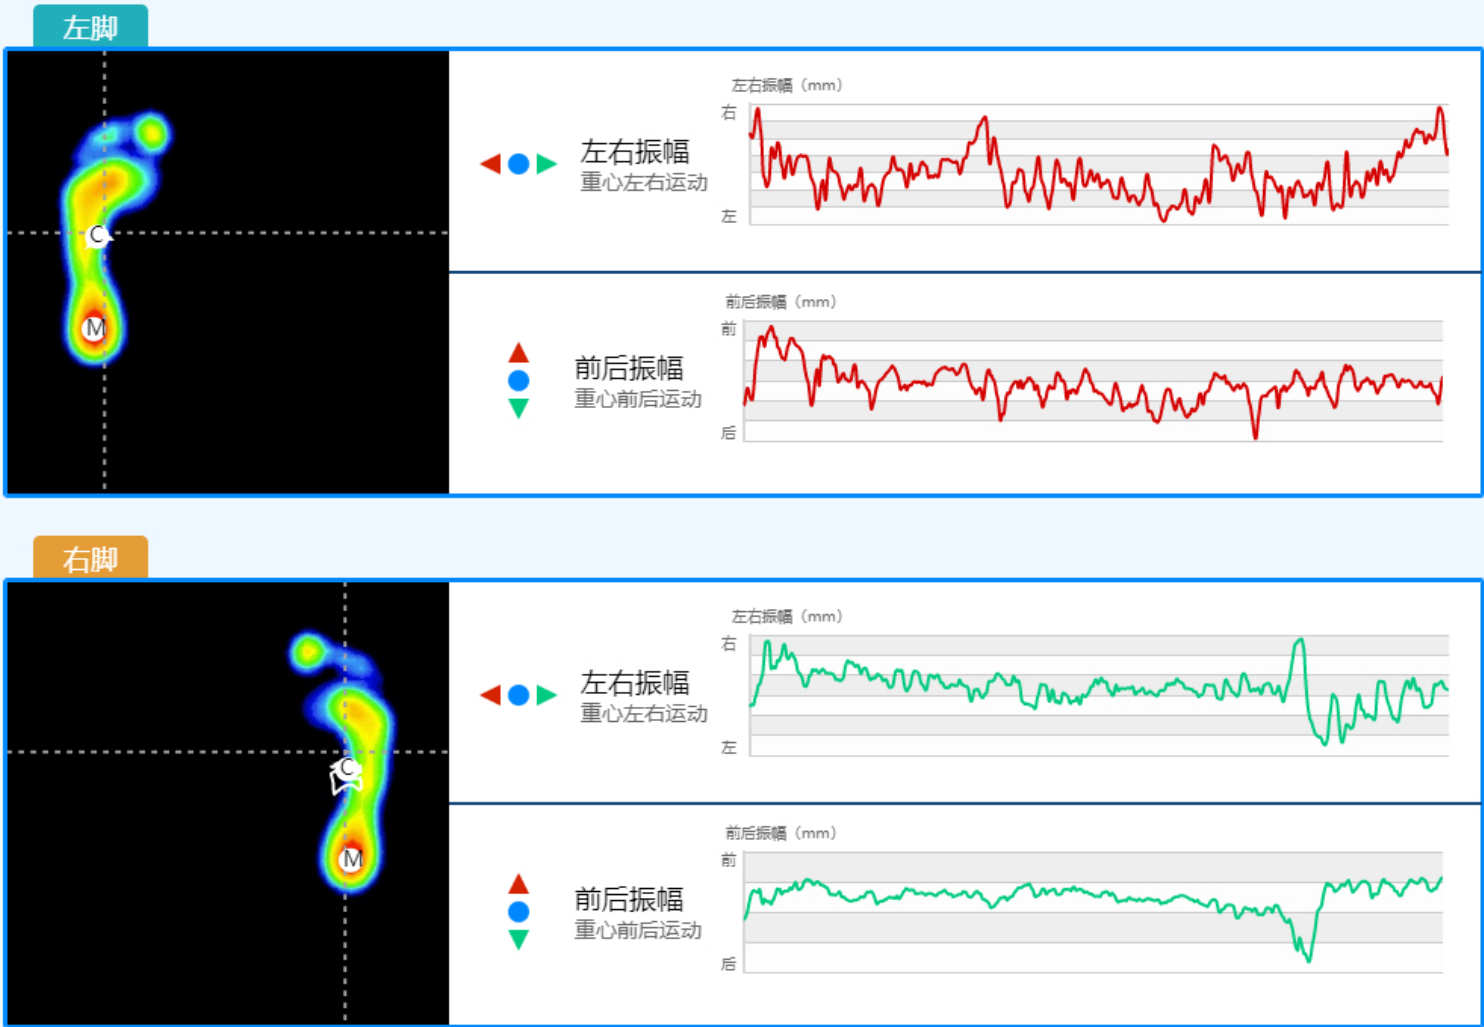

Cop数据

|             | 左脚     | 右脚     |
|-------------|--------|--------|
| 平均位置X【mm】   | -6.53  | 1.78   |
| 平均位置Y【mm】   | -3.55  | -15.17 |
| 标准差X【mm】    | 3.88   | 4.36   |
| 标准差Y【mm】    | 2.54   | 4.25   |
| 距离【mm】      | 562.11 | 508.08 |
| 平均速度【mm/ms】 | 0.02   | 0.02   |
| 距离/表面积      | 2.70   | 0.92   |
| 偏心率         | 0.77   | 0.11   |
| 倾斜角度【°】     | -17.33 | -8.72  |

# 平衡报告

马柯辉 19岁 女 48.0kg 158.0cm 2025-2-26 09:52:02

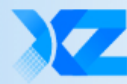

## 报告结论

睁眼  
左右晃动比前后晃动更明显
