# Supplementary material for: Individualized Corrective Training Based on Precision Biomechanical Assessment for the Prevention of Sports Injuries in Adolescents
Source: Research Square preprint supplement (doi:10.21203/rs.3.rs-8426574/v1), 2026-02-02
Supplement: Supplementary file 56 [file 静态报告-侯文琪-20250226104433.pdf › Plantar pressure and gait analysis/aerobics /静态报告-侯文琪-20250226104433.pdf]

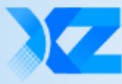

静态双脚数据

左脚

|            |      |
|------------|------|
| 面积【mm²】    | 7116 |
| 前/双足【%】    | 17   |
| 前/全足【%】    | 38   |
| 最大压强【gr/%】 | 187  |
| 平均压强【gr/%】 | 165  |

|            |      |
|------------|------|
| 面积【mm²】    | 5613 |
| 后/双足【%】    | 28   |
| 后/全足【%】    | 62   |
| 最大压强【gr/%】 | 357  |
| 平均压强【gr/%】 | 345  |

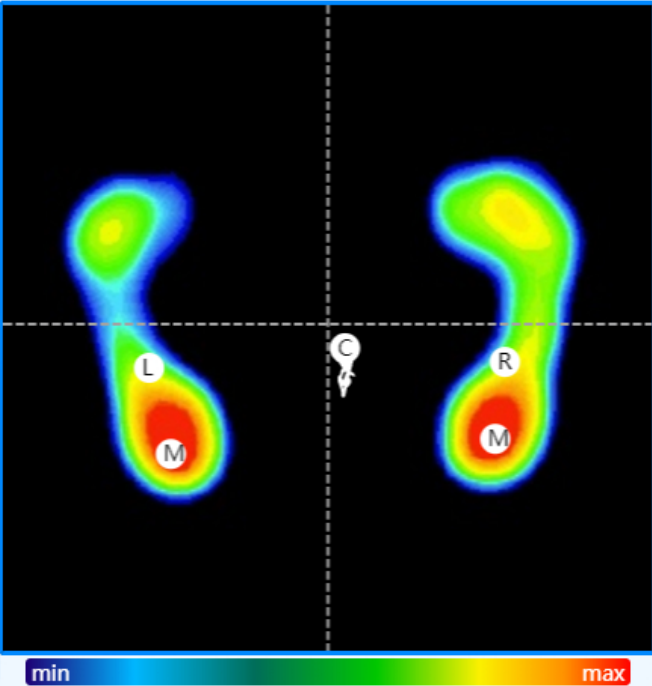

右脚

|            |      |
|------------|------|
| 面积【mm²】    | 7668 |
| 前/双足【%】    | 25   |
| 前/全足【%】    | 45   |
| 最大压强【gr/%】 | 253  |
| 平均压强【gr/%】 | 221  |

|            |      |
|------------|------|
| 面积【mm²】    | 6167 |
| 后/双足【%】    | 30   |
| 后/全足【%】    | 55   |
| 最大压强【gr/%】 | 359  |
| 平均压强【gr/%】 | 335  |

双脚综合数据

左脚总和

|            |       |
|------------|-------|
| 面积【mm²】    | 12729 |
| 负荷【%】      | 45    |
| 最大压强【gr/%】 | 253   |
| 平均压强【gr/%】 | 245   |

右脚总和

|            |       |
|------------|-------|
| 面积【mm²】    | 13835 |
| 负荷【%】      | 55    |
| 最大压强【gr/%】 | 285   |
| 平均压强【gr/%】 | 273   |

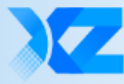

足弓类型

左脚

足弓指数 27.00%

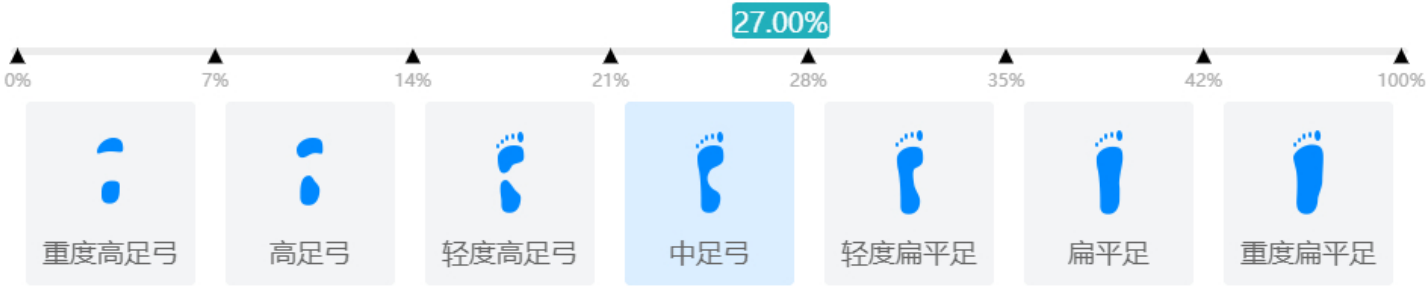

右脚

足弓指数 27.00%

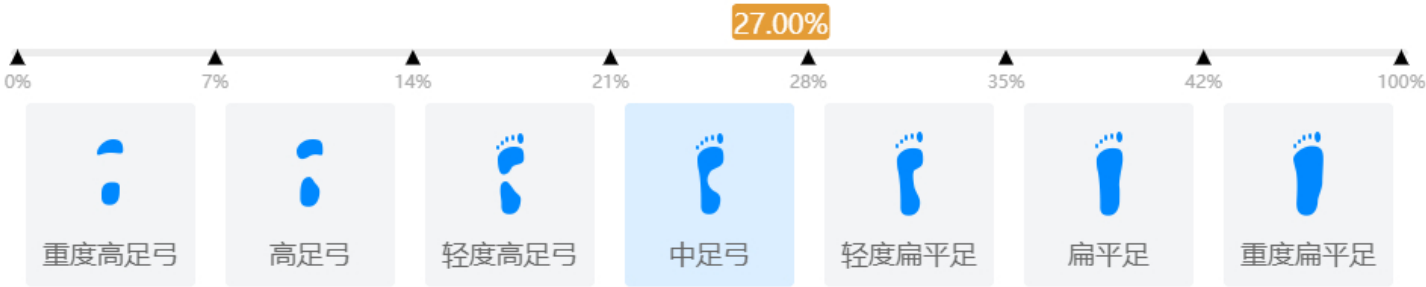

报告结论

左脚前足轻度内翻  
右脚横弓塌陷  
身体重心过度靠后
