# Supplementary material for: Individualized Corrective Training Based on Precision Biomechanical Assessment for the Prevention of Sports Injuries in Adolescents
Source: Research Square preprint supplement (doi:10.21203/rs.3.rs-8426574/v1), 2026-02-02
Supplement: Supplementary file 57 [file 静态报告-周敏-20250226100607.pdf › Plantar pressure and gait analysis/aerobics /静态报告-周敏-20250226100607.pdf]

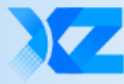

静态双脚数据

左脚

|            |      |
|------------|------|
| 面积【mm²】    | 6064 |
| 前/双足【%】    | 21   |
| 前/全足【%】    | 45   |
| 最大压强【gr/%】 | 191  |
| 平均压强【gr/%】 | 171  |

|            |      |
|------------|------|
| 面积【mm²】    | 5117 |
| 后/双足【%】    | 26   |
| 后/全足【%】    | 55   |
| 最大压强【gr/%】 | 257  |
| 平均压强【gr/%】 | 248  |

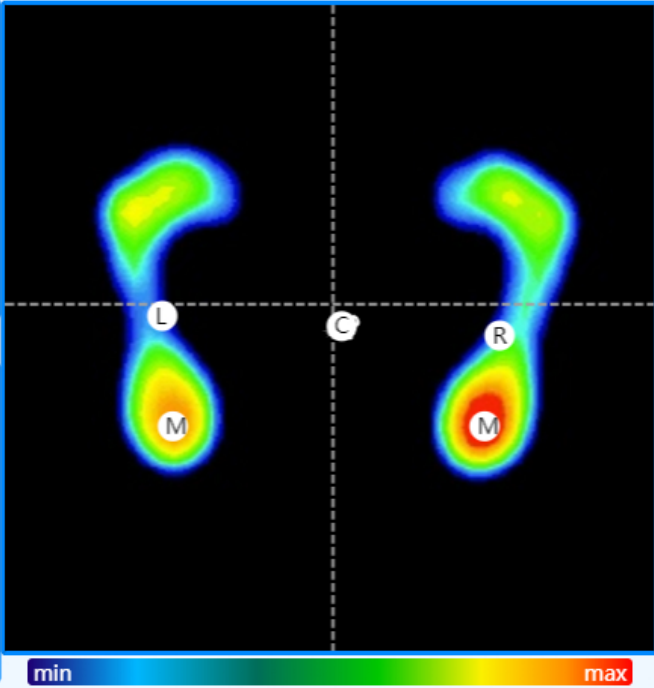

右脚

|            |      |
|------------|------|
| 面积【mm²】    | 6418 |
| 前/双足【%】    | 22   |
| 前/全足【%】    | 41   |
| 最大压强【gr/%】 | 201  |
| 平均压强【gr/%】 | 169  |

|            |      |
|------------|------|
| 面积【mm²】    | 5114 |
| 后/双足【%】    | 31   |
| 后/全足【%】    | 59   |
| 最大压强【gr/%】 | 318  |
| 平均压强【gr/%】 | 300  |

双脚综合数据

左脚总和

|            |       |
|------------|-------|
| 面积【mm²】    | 11180 |
| 负荷【%】      | 47    |
| 最大压强【gr/%】 | 213   |
| 平均压强【gr/%】 | 206   |

右脚总和

|            |       |
|------------|-------|
| 面积【mm²】    | 11532 |
| 负荷【%】      | 53    |
| 最大压强【gr/%】 | 244   |
| 平均压强【gr/%】 | 227   |

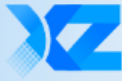

足弓类型

左脚

足弓指数 24.00%

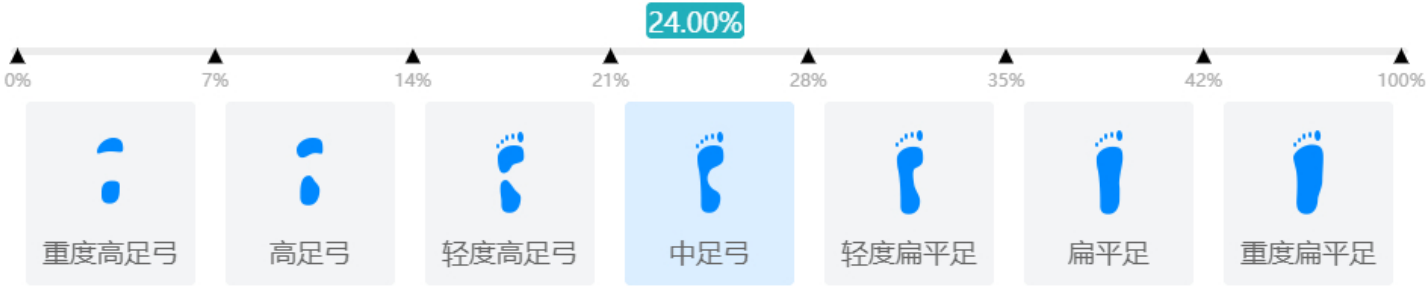

右脚

足弓指数 24.00%

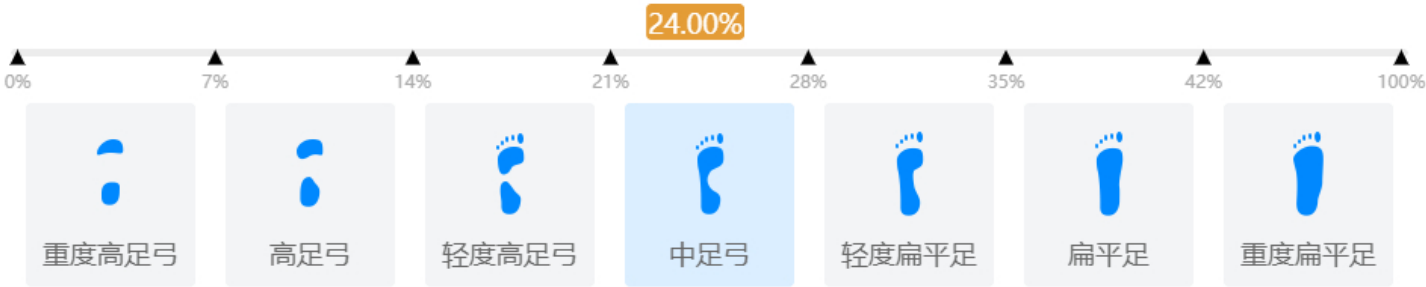

报告结论

左脚前足轻度内翻  
右脚横弓塌陷  
身体重心过度靠后
