# Supplementary material for: Individualized Corrective Training Based on Precision Biomechanical Assessment for the Prevention of Sports Injuries in Adolescents
Source: Research Square preprint supplement (doi:10.21203/rs.3.rs-8426574/v1), 2026-02-02
Supplement: Supplementary file 58 [file 静态报告-孙微珊-20250226164547.pdf › Plantar pressure and gait analysis/aerobics /静态报告-孙微珊-20250226164547.pdf]

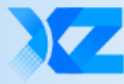

静态双脚数据

左脚

|            |      |
|------------|------|
| 面积【mm²】    | 5520 |
| 前/双足【%】    | 23   |
| 前/全足【%】    | 46   |
| 最大压强【gr/%】 | 235  |
| 平均压强【gr/%】 | 182  |

|            |      |
|------------|------|
| 面积【mm²】    | 4424 |
| 后/双足【%】    | 27   |
| 后/全足【%】    | 54   |
| 最大压强【gr/%】 | 295  |
| 平均压强【gr/%】 | 266  |

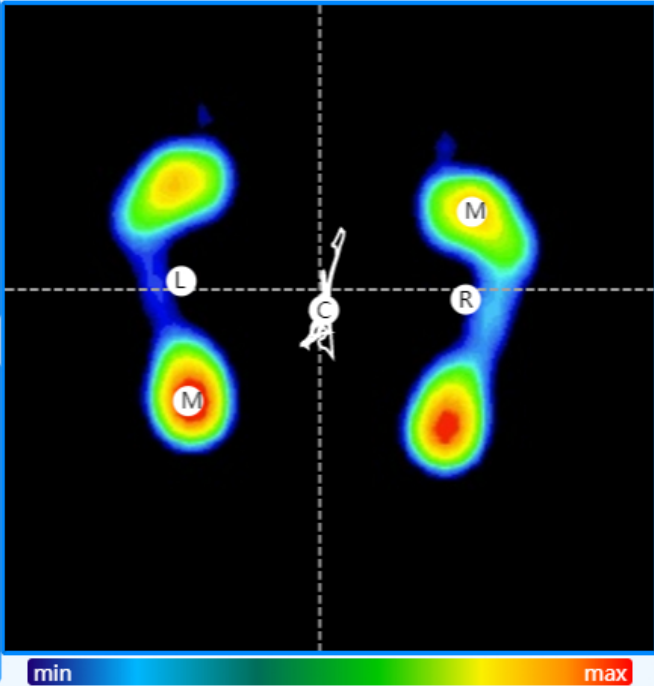

右脚

|            |      |
|------------|------|
| 面积【mm²】    | 5758 |
| 前/双足【%】    | 25   |
| 前/全足【%】    | 50   |
| 最大压强【gr/%】 | 262  |
| 平均压强【gr/%】 | 193  |

|            |      |
|------------|------|
| 面积【mm²】    | 4609 |
| 后/双足【%】    | 25   |
| 后/全足【%】    | 50   |
| 最大压强【gr/%】 | 290  |
| 平均压强【gr/%】 | 244  |

双脚综合数据

左脚总和

|            |      |
|------------|------|
| 面积【mm²】    | 9944 |
| 负荷【%】      | 49   |
| 最大压强【gr/%】 | 235  |
| 平均压强【gr/%】 | 222  |

右脚总和

|            |       |
|------------|-------|
| 面积【mm²】    | 10368 |
| 负荷【%】      | 51    |
| 最大压强【gr/%】 | 232   |
| 平均压强【gr/%】 | 219   |



足弓类型

左脚

足弓指数 20.00%

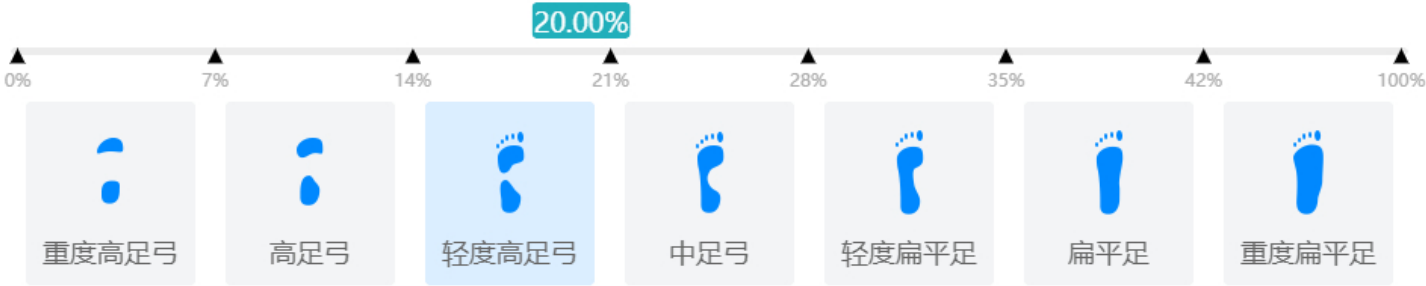

右脚

足弓指数 23.00%

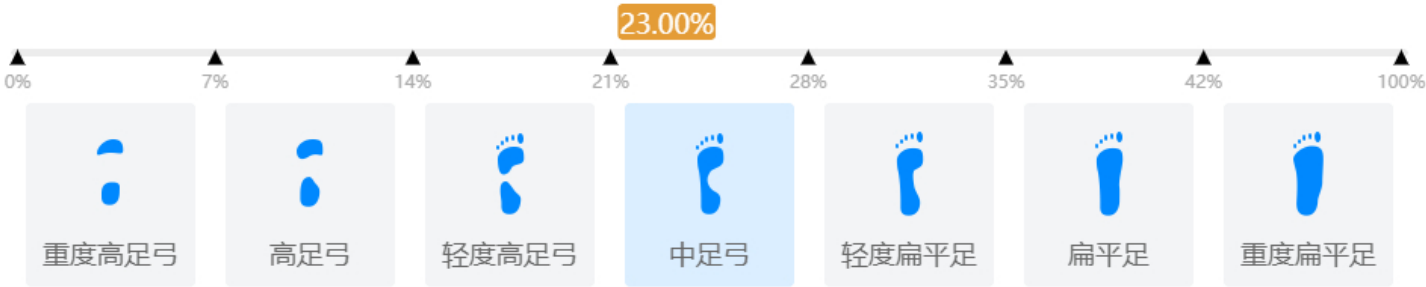

报告结论

左脚横弓塌陷  
左脚足弓偏高  
右脚横弓塌陷  
身体重心过度靠后  
左右侧足弓形状压力差异较大
