# Supplementary material for: Individualized Corrective Training Based on Precision Biomechanical Assessment for the Prevention of Sports Injuries in Adolescents
Source: Research Square preprint supplement (doi:10.21203/rs.3.rs-8426574/v1), 2026-02-02
Supplement: Supplementary file 59 [file 静态报告-孙悦-20250226102243.pdf › Plantar pressure and gait analysis/aerobics /静态报告-孙悦-20250226102243.pdf]

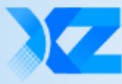

静态双脚数据

左脚

|            |      |
|------------|------|
| 面积【mm²】    | 6952 |
| 前/双足【%】    | 19   |
| 前/全足【%】    | 42   |
| 最大压强【gr/%】 | 154  |
| 平均压强【gr/%】 | 145  |

|            |      |
|------------|------|
| 面积【mm²】    | 5538 |
| 后/双足【%】    | 27   |
| 后/全足【%】    | 58   |
| 最大压强【gr/%】 | 269  |
| 平均压强【gr/%】 | 257  |

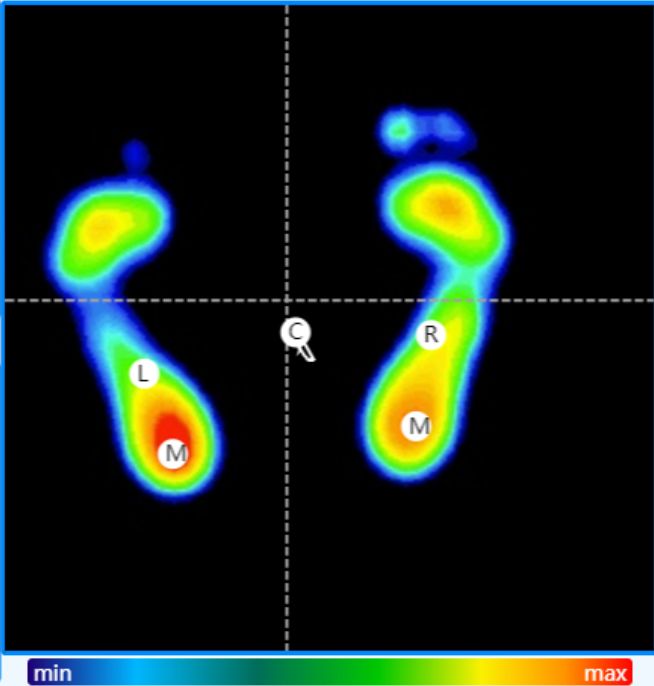

右脚

|            |      |
|------------|------|
| 面积【mm²】    | 8057 |
| 前/双足【%】    | 24   |
| 前/全足【%】    | 46   |
| 最大压强【gr/%】 | 171  |
| 平均压强【gr/%】 | 159  |

|            |      |
|------------|------|
| 面积【mm²】    | 6127 |
| 后/双足【%】    | 29   |
| 后/全足【%】    | 54   |
| 最大压强【gr/%】 | 298  |
| 平均压强【gr/%】 | 249  |

双脚综合数据

左脚总和

|            |       |
|------------|-------|
| 面积【mm²】    | 12490 |
| 负荷【%】      | 46    |
| 最大压强【gr/%】 | 199   |
| 平均压强【gr/%】 | 195   |

右脚总和

|            |       |
|------------|-------|
| 面积【mm²】    | 14184 |
| 负荷【%】      | 54    |
| 最大压强【gr/%】 | 224   |
| 平均压强【gr/%】 | 198   |

静态报告

孙悦 21岁 女 55.0kg 167.0cm 2025-2-26 10:21:53



足弓类型

左脚

足弓指数 25.00%

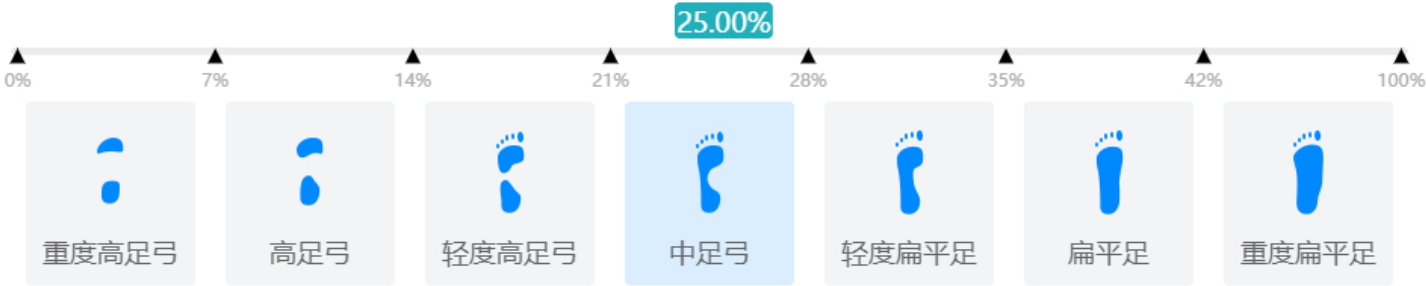

右脚

足弓指数 25.00%

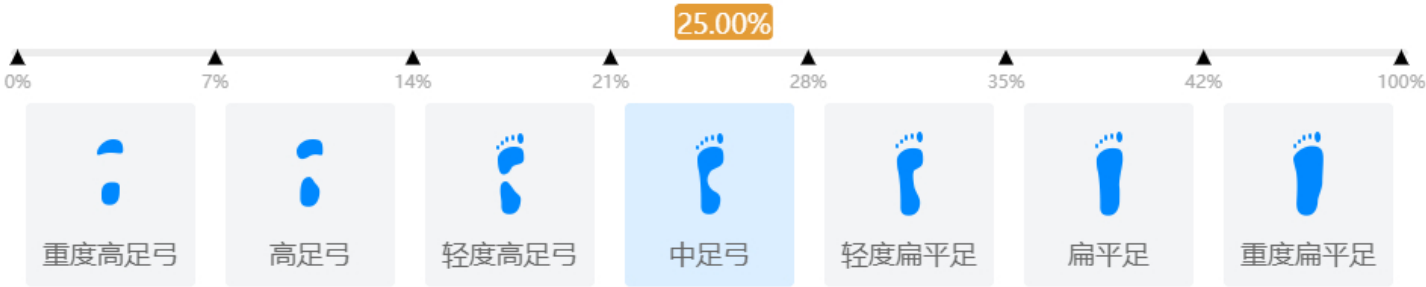

报告结论

左脚横弓塌陷  
右脚横弓塌陷  
身体重心过度靠后
