# Supplementary material for: Individualized Corrective Training Based on Precision Biomechanical Assessment for the Prevention of Sports Injuries in Adolescents
Source: Research Square preprint supplement (doi:10.21203/rs.3.rs-8426574/v1), 2026-02-02
Supplement: Supplementary file 60 [file 静态报告-宋璐杰-20250226094749.pdf › Plantar pressure and gait analysis/aerobics /静态报告-宋璐杰-20250226094749.pdf]

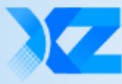

静态双脚数据

左脚

|            |      |
|------------|------|
| 面积【mm²】    | 6535 |
| 前/双足【%】    | 24   |
| 前/全足【%】    | 45   |
| 最大压强【gr/%】 | 176  |
| 平均压强【gr/%】 | 165  |

|            |      |
|------------|------|
| 面积【mm²】    | 5066 |
| 后/双足【%】    | 29   |
| 后/全足【%】    | 55   |
| 最大压强【gr/%】 | 289  |
| 平均压强【gr/%】 | 261  |

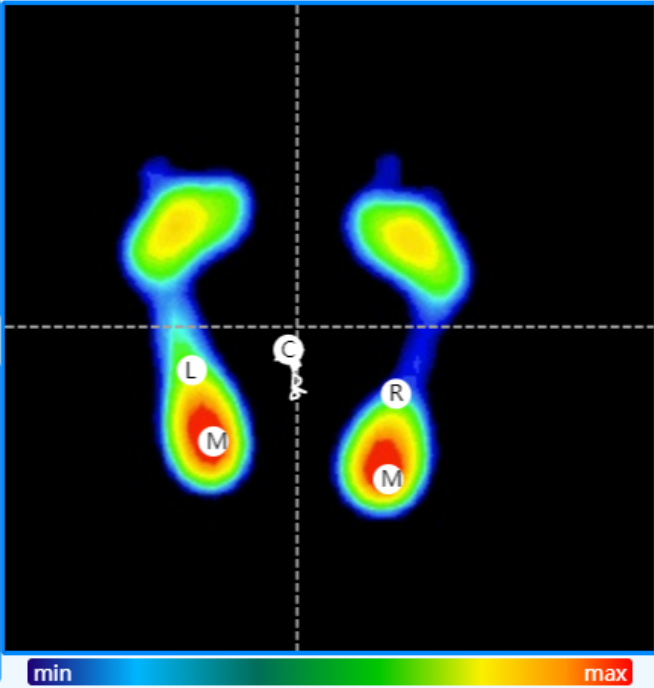

右脚

|            |      |
|------------|------|
| 面积【mm²】    | 6287 |
| 前/双足【%】    | 21   |
| 前/全足【%】    | 45   |
| 最大压强【gr/%】 | 170  |
| 平均压强【gr/%】 | 153  |

|            |      |
|------------|------|
| 面积【mm²】    | 4883 |
| 后/双足【%】    | 26   |
| 后/全足【%】    | 55   |
| 最大压强【gr/%】 | 284  |
| 平均压强【gr/%】 | 243  |

双脚综合数据

左脚总和

|            |       |
|------------|-------|
| 面积【mm²】    | 11601 |
| 负荷【%】      | 53    |
| 最大压强【gr/%】 | 224   |
| 平均压强【gr/%】 | 207   |

右脚总和

|            |       |
|------------|-------|
| 面积【mm²】    | 11170 |
| 负荷【%】      | 47    |
| 最大压强【gr/%】 | 214   |
| 平均压强【gr/%】 | 193   |



足弓类型

左脚

足弓指数 24.00%

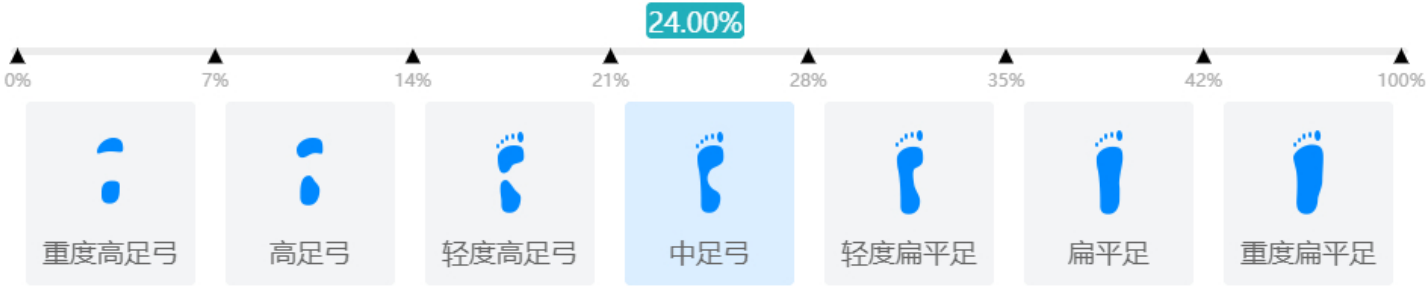

右脚

足弓指数 19.00%

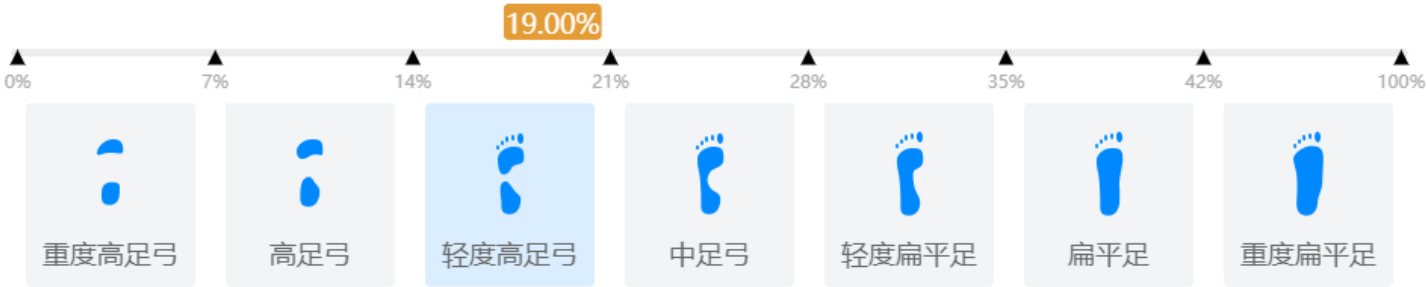

报告结论

左脚横弓塌陷  
右脚横弓塌陷  
右脚足弓偏高  
身体重心过度靠后
