# Supplementary material for: Individualized Corrective Training Based on Precision Biomechanical Assessment for the Prevention of Sports Injuries in Adolescents
Source: Research Square preprint supplement (doi:10.21203/rs.3.rs-8426574/v1), 2026-02-02
Supplement: Supplementary file 61 [file 静态报告-张东琪-20250226102952.pdf › Plantar pressure and gait analysis/aerobics /静态报告-张东琪-20250226102952.pdf]

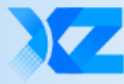

静态双脚数据

左脚

|            |      |
|------------|------|
| 面积【mm²】    | 7193 |
| 前/双足【%】    | 27   |
| 前/全足【%】    | 50   |
| 最大压强【gr/%】 | 205  |
| 平均压强【gr/%】 | 178  |

|            |      |
|------------|------|
| 面积【mm²】    | 5176 |
| 后/双足【%】    | 26   |
| 后/全足【%】    | 50   |
| 最大压强【gr/%】 | 252  |
| 平均压强【gr/%】 | 244  |

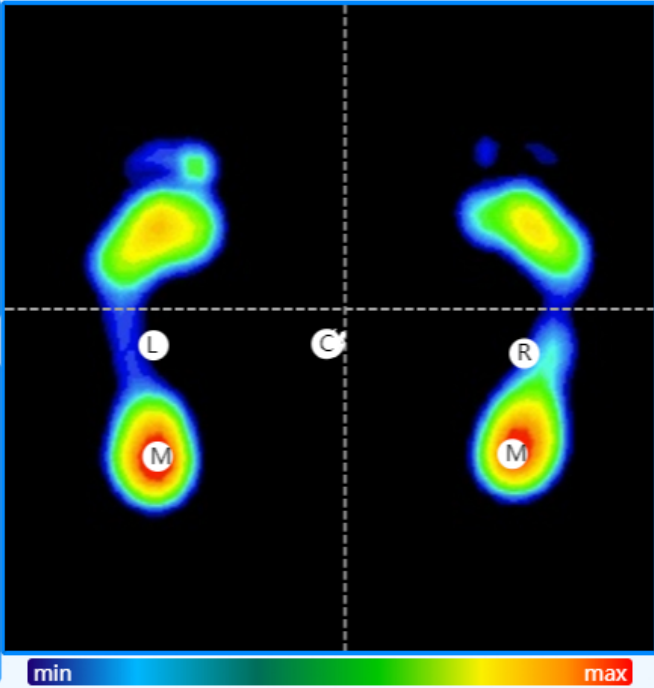

右脚

|            |      |
|------------|------|
| 面积【mm²】    | 6420 |
| 前/双足【%】    | 20   |
| 前/全足【%】    | 42   |
| 最大压强【gr/%】 | 175  |
| 平均压强【gr/%】 | 147  |

|            |      |
|------------|------|
| 面积【mm²】    | 5014 |
| 后/双足【%】    | 27   |
| 后/全足【%】    | 58   |
| 最大压强【gr/%】 | 278  |
| 平均压强【gr/%】 | 256  |

双脚综合数据

左脚总和

|            |       |
|------------|-------|
| 面积【mm²】    | 12369 |
| 负荷【%】      | 53    |
| 最大压强【gr/%】 | 224   |
| 平均压强【gr/%】 | 206   |

右脚总和

|            |       |
|------------|-------|
| 面积【mm²】    | 11434 |
| 负荷【%】      | 47    |
| 最大压强【gr/%】 | 215   |
| 平均压强【gr/%】 | 195   |

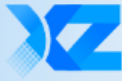

足弓类型

左脚

足弓指数 19.00%

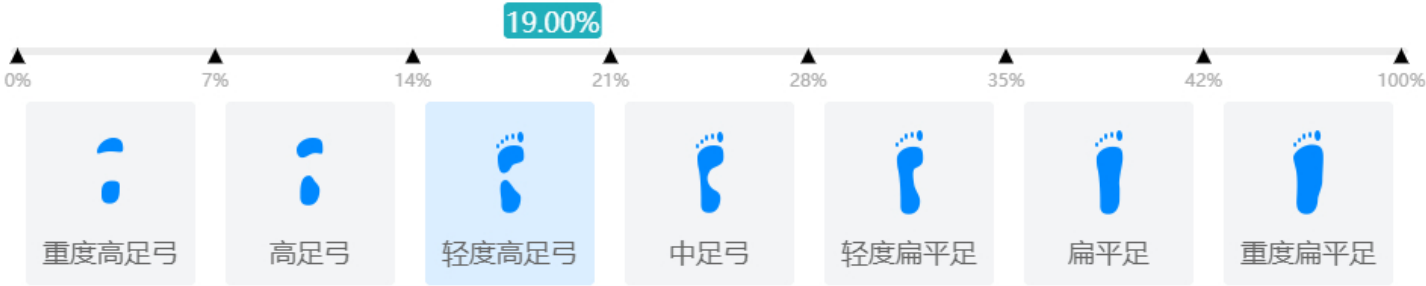

右脚

足弓指数 21.00%

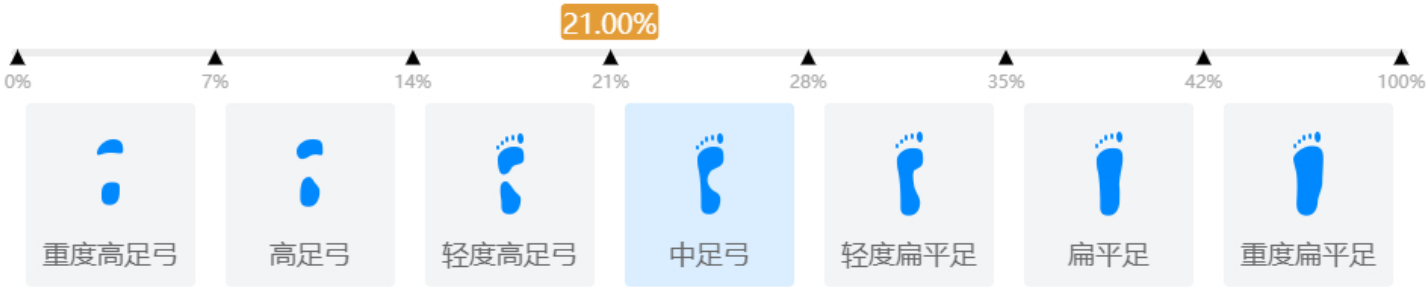

报告结论

左脚横弓塌陷  
左脚足弓偏高  
右脚横弓塌陷  
身体重心过度靠后
