# Supplementary material for: Individualized Corrective Training Based on Precision Biomechanical Assessment for the Prevention of Sports Injuries in Adolescents
Source: Research Square preprint supplement (doi:10.21203/rs.3.rs-8426574/v1), 2026-02-02
Supplement: Supplementary file 62 [file 静态报告-智豪龙-20250226165214.pdf › Plantar pressure and gait analysis/aerobics /静态报告-智豪龙-20250226165214.pdf]

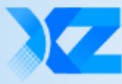

静态双脚数据

左脚

|            |      |
|------------|------|
| 面积【mm²】    | 7912 |
| 前/双足【%】    | 25   |
| 前/全足【%】    | 52   |
| 最大压强【gr/%】 | 253  |
| 平均压强【gr/%】 | 215  |

|            |      |
|------------|------|
| 面积【mm²】    | 6119 |
| 后/双足【%】    | 23   |
| 后/全足【%】    | 48   |
| 最大压强【gr/%】 | 286  |
| 平均压强【gr/%】 | 251  |

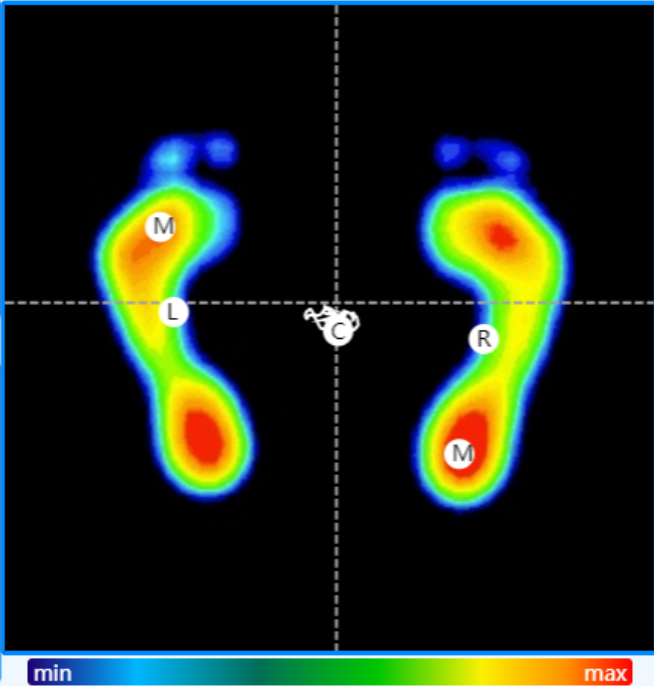

右脚

|            |      |
|------------|------|
| 面积【mm²】    | 8576 |
| 前/双足【%】    | 27   |
| 前/全足【%】    | 51   |
| 最大压强【gr/%】 | 229  |
| 平均压强【gr/%】 | 211  |

|            |      |
|------------|------|
| 面积【mm²】    | 6514 |
| 后/双足【%】    | 26   |
| 后/全足【%】    | 49   |
| 最大压强【gr/%】 | 315  |
| 平均压强【gr/%】 | 265  |

双脚综合数据

左脚总和

|            |       |
|------------|-------|
| 面积【mm²】    | 14031 |
| 负荷【%】      | 48    |
| 最大压强【gr/%】 | 259   |
| 平均压强【gr/%】 | 231   |

右脚总和

|            |       |
|------------|-------|
| 面积【mm²】    | 15090 |
| 负荷【%】      | 52    |
| 最大压强【gr/%】 | 256   |
| 平均压强【gr/%】 | 235   |

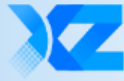

足弓类型

左脚

足弓指数 25.00%

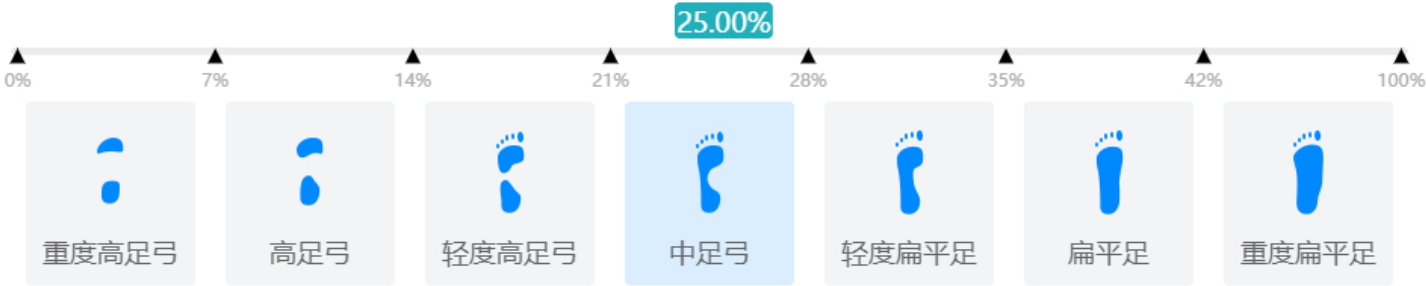

右脚

足弓指数 26.00%

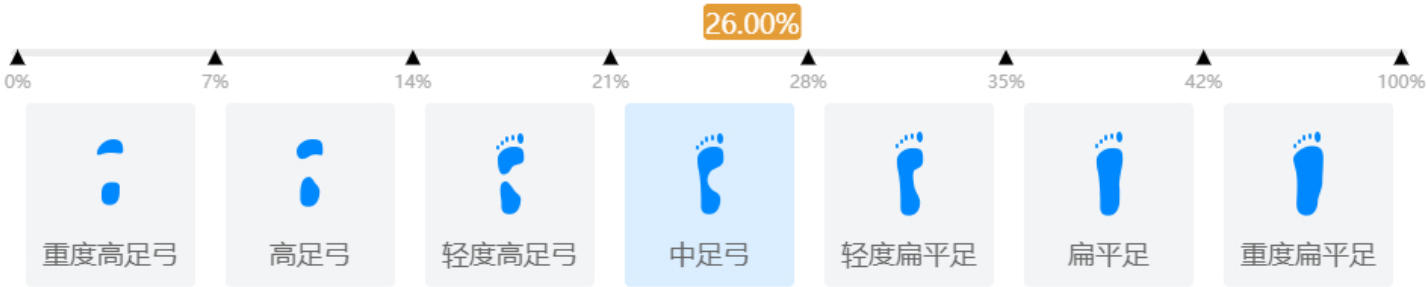

报告结论

左脚横弓塌陷  
右脚横弓塌陷  
身体重心过度靠后
