# Supplementary material for: Individualized Corrective Training Based on Precision Biomechanical Assessment for the Prevention of Sports Injuries in Adolescents
Source: Research Square preprint supplement (doi:10.21203/rs.3.rs-8426574/v1), 2026-02-02
Supplement: Supplementary file 63 [file 静态报告-朱梓齐-20250226100016.pdf › Plantar pressure and gait analysis/aerobics /静态报告-朱梓齐-20250226100016.pdf]

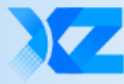

静态双脚数据

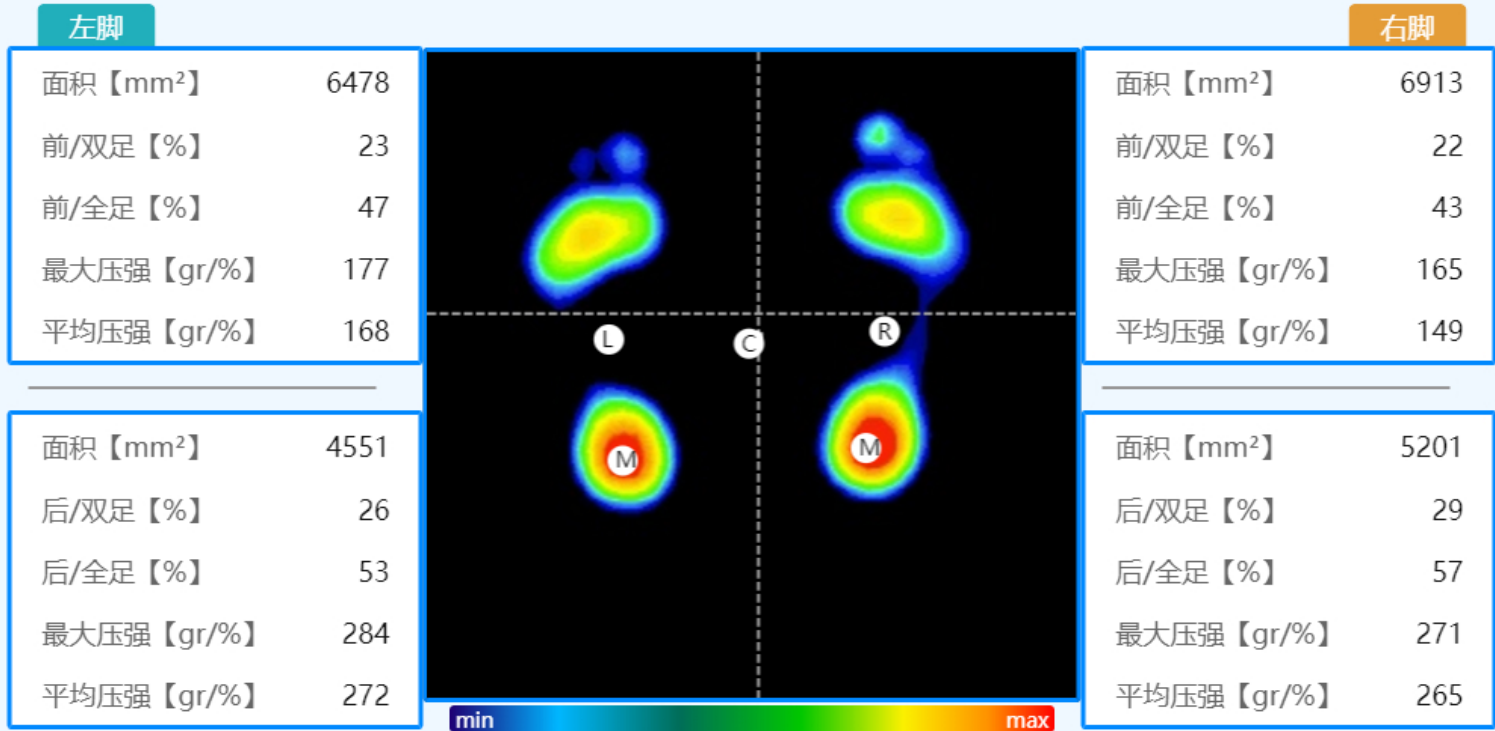

双脚综合数据

| 左脚总和                 |       | 右脚总和                 |       |
|----------------------|-------|----------------------|-------|
| 面积【mm <sup>2</sup> 】 | 11029 | 面积【mm <sup>2</sup> 】 | 12114 |
| 负荷【%】                | 49    | 负荷【%】                | 51    |
| 最大压强【gr/%】           | 213   | 最大压强【gr/%】           | 207   |
| 平均压强【gr/%】           | 211   | 平均压强【gr/%】           | 199   |

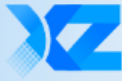

足弓类型

左脚

足弓指数 6.00%

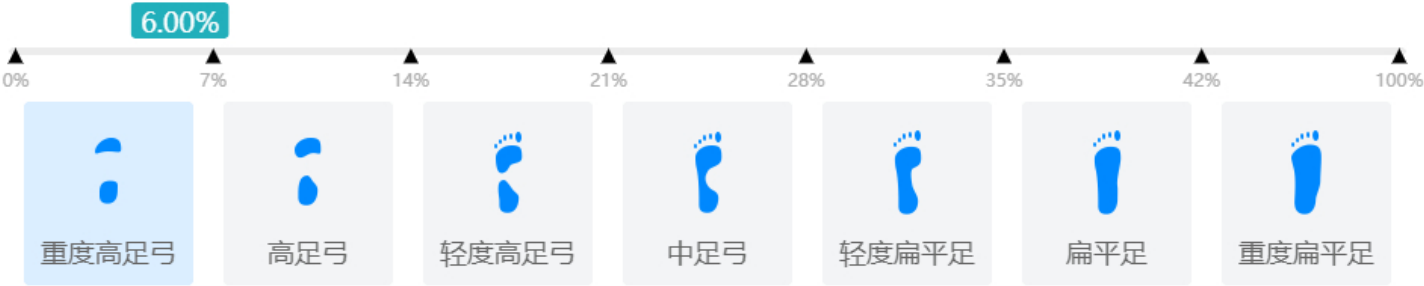

右脚

足弓指数 14.00%

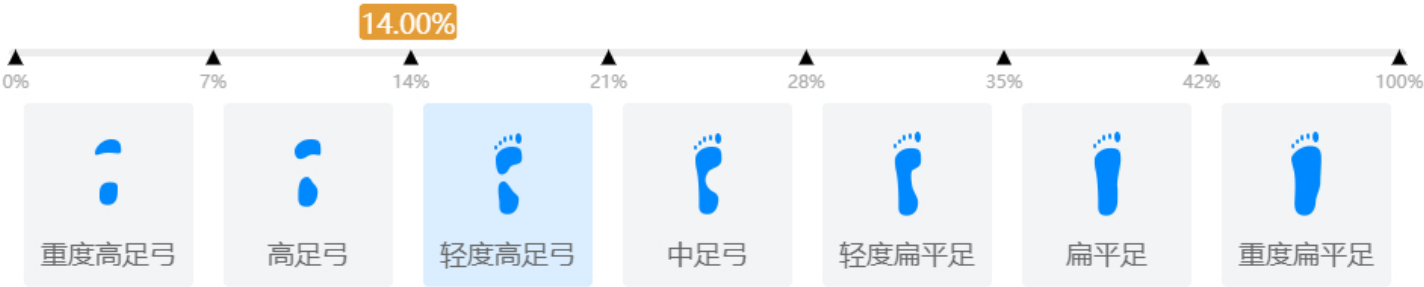

报告结论

左脚横弓塌陷  
左脚足弓过高  
右脚横弓塌陷  
右脚足弓过高  
身体重心过度靠后  
左右侧足弓形状压力差异较大
