# Supplementary material for: Individualized Corrective Training Based on Precision Biomechanical Assessment for the Prevention of Sports Injuries in Adolescents
Source: Research Square preprint supplement (doi:10.21203/rs.3.rs-8426574/v1), 2026-02-02
Supplement: Supplementary file 64 [file 静态报告-朱梓齐-20250304101523.pdf › Plantar pressure and gait analysis/aerobics /静态报告-朱梓齐-20250304101523.pdf]

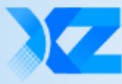

静态双脚数据

左脚

|            |      |
|------------|------|
| 面积【mm²】    | 6478 |
| 前/双足【%】    | 23   |
| 前/全足【%】    | 47   |
| 最大压强【gr/%】 | 177  |
| 平均压强【gr/%】 | 168  |

|            |      |
|------------|------|
| 面积【mm²】    | 4551 |
| 后/双足【%】    | 26   |
| 后/全足【%】    | 53   |
| 最大压强【gr/%】 | 284  |
| 平均压强【gr/%】 | 272  |

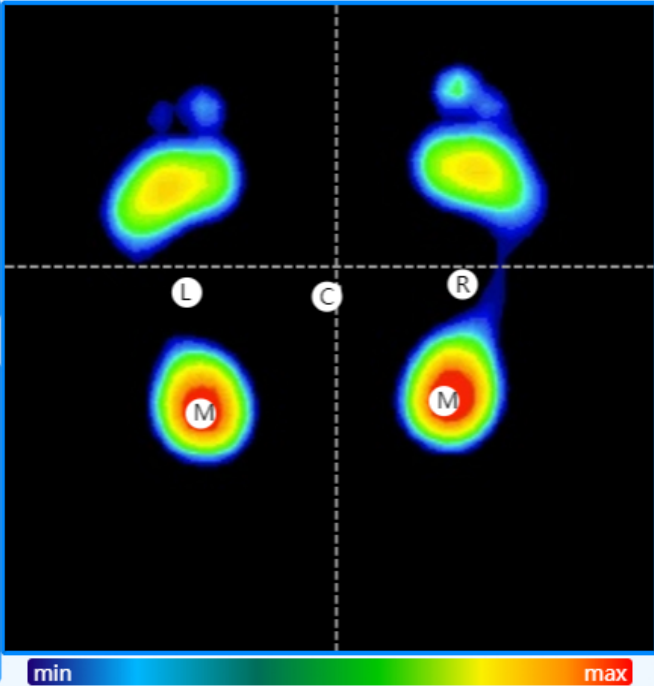

右脚

|            |      |
|------------|------|
| 面积【mm²】    | 6913 |
| 前/双足【%】    | 22   |
| 前/全足【%】    | 43   |
| 最大压强【gr/%】 | 165  |
| 平均压强【gr/%】 | 149  |

|            |      |
|------------|------|
| 面积【mm²】    | 5201 |
| 后/双足【%】    | 29   |
| 后/全足【%】    | 57   |
| 最大压强【gr/%】 | 271  |
| 平均压强【gr/%】 | 265  |

双脚综合数据

左脚总和

|            |       |
|------------|-------|
| 面积【mm²】    | 11029 |
| 负荷【%】      | 49    |
| 最大压强【gr/%】 | 213   |
| 平均压强【gr/%】 | 211   |

右脚总和

|            |       |
|------------|-------|
| 面积【mm²】    | 12114 |
| 负荷【%】      | 51    |
| 最大压强【gr/%】 | 207   |
| 平均压强【gr/%】 | 199   |

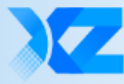

足弓类型

左脚

足弓指数 6.00%

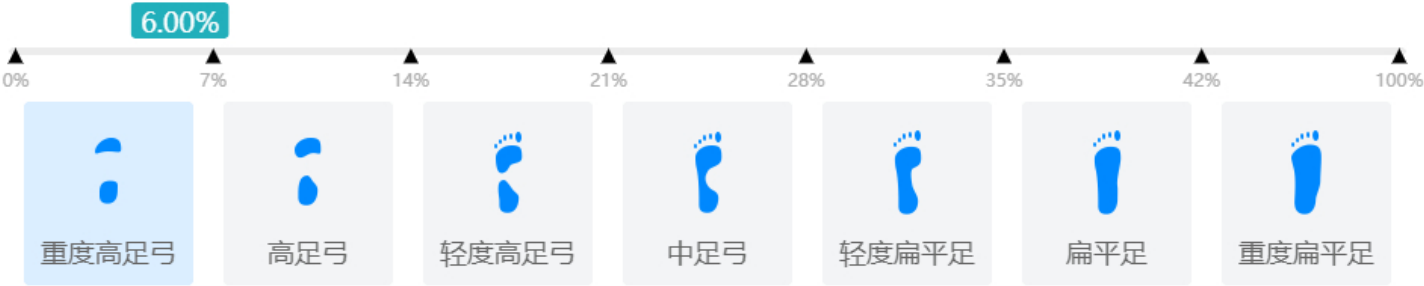

右脚

足弓指数 14.00%

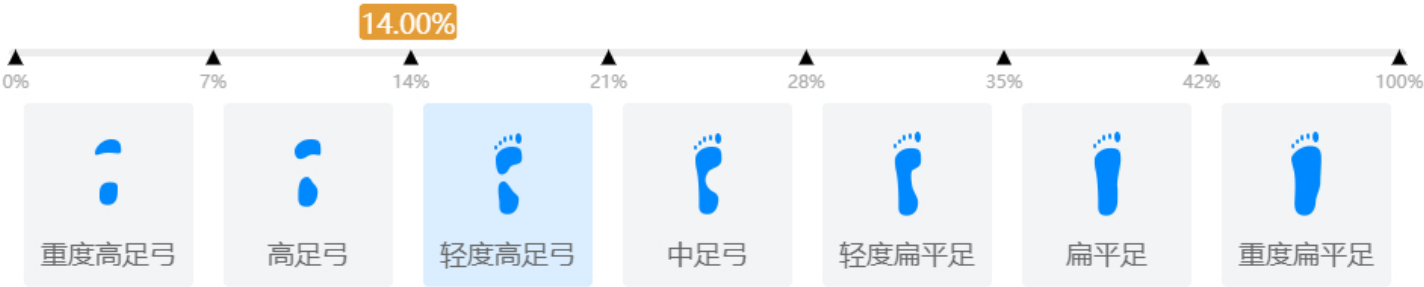

报告结论

左脚横弓塌陷  
左脚足弓过高  
右脚横弓塌陷  
右脚足弓过高  
身体重心过度靠后  
左右侧足弓形状压力差异较大
