# Supplementary material for: Individualized Corrective Training Based on Precision Biomechanical Assessment for the Prevention of Sports Injuries in Adolescents
Source: Research Square preprint supplement (doi:10.21203/rs.3.rs-8426574/v1), 2026-02-02
Supplement: Supplementary file 65 [file 静态报告-段瑶-20250226164719.pdf › Plantar pressure and gait analysis/aerobics /静态报告-段瑶-20250226164719.pdf]

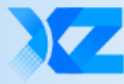

静态双脚数据

左脚

|            |      |
|------------|------|
| 面积【mm²】    | 7137 |
| 前/双足【%】    | 23   |
| 前/全足【%】    | 46   |
| 最大压强【gr/%】 | 196  |
| 平均压强【gr/%】 | 160  |

|            |      |
|------------|------|
| 面积【mm²】    | 5391 |
| 后/双足【%】    | 28   |
| 后/全足【%】    | 54   |
| 最大压强【gr/%】 | 290  |
| 平均压强【gr/%】 | 256  |

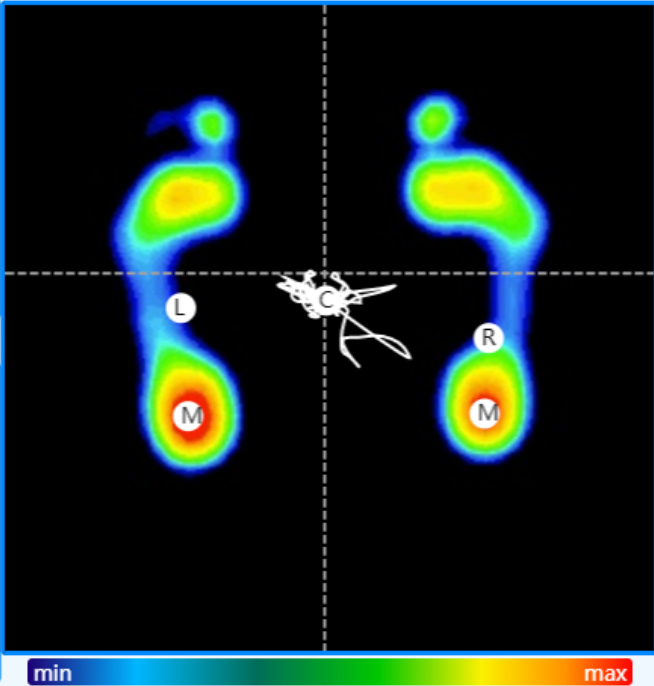

右脚

|            |      |
|------------|------|
| 面积【mm²】    | 6758 |
| 前/双足【%】    | 25   |
| 前/全足【%】    | 51   |
| 最大压强【gr/%】 | 224  |
| 平均压强【gr/%】 | 182  |

|            |      |
|------------|------|
| 面积【mm²】    | 5028 |
| 后/双足【%】    | 24   |
| 后/全足【%】    | 49   |
| 最大压强【gr/%】 | 334  |
| 平均压强【gr/%】 | 231  |

双脚综合数据

左脚总和

|            |       |
|------------|-------|
| 面积【mm²】    | 12529 |
| 负荷【%】      | 51    |
| 最大压强【gr/%】 | 226   |
| 平均压强【gr/%】 | 202   |

右脚总和

|            |       |
|------------|-------|
| 面积【mm²】    | 11786 |
| 负荷【%】      | 49    |
| 最大压强【gr/%】 | 255   |
| 平均压强【gr/%】 | 204   |

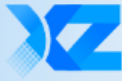

足弓类型

左脚

足弓指数 23.00%

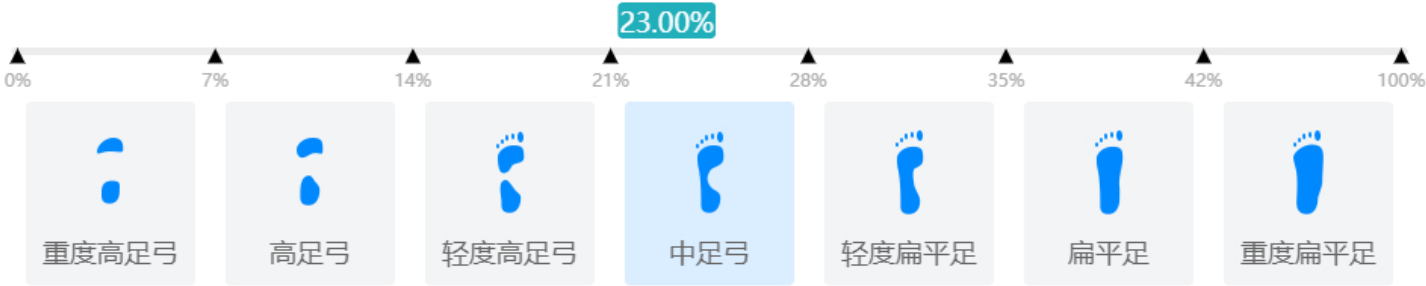

右脚

足弓指数 22.00%

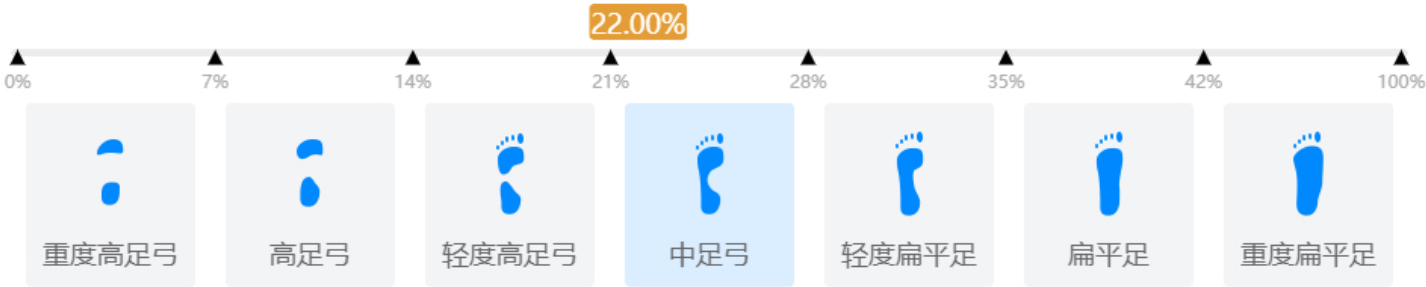

报告结论

左脚横弓塌陷  
右脚横弓塌陷  
身体重心过度靠后
