# Supplementary material for: Individualized Corrective Training Based on Precision Biomechanical Assessment for the Prevention of Sports Injuries in Adolescents
Source: Research Square preprint supplement (doi:10.21203/rs.3.rs-8426574/v1), 2026-02-02
Supplement: Supplementary file 66 [file 静态报告-温欢-20250226165104.pdf › Plantar pressure and gait analysis/aerobics /静态报告-温欢-20250226165104.pdf]

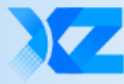

静态双脚数据

| 左脚                   |      |  |                      | 右脚   |  |
|----------------------|------|--|----------------------|------|--|
| 面积【mm <sup>2</sup> 】 | 6591 |  | 面积【mm <sup>2</sup> 】 | 7168 |  |
| 前/双足【%】              | 20   |  | 前/双足【%】              | 24   |  |
| 前/全足【%】              | 43   |  | 前/全足【%】              | 46   |  |
| 最大压强【gr/%】           | 137  |  | 最大压强【gr/%】           | 150  |  |
| 平均压强【gr/%】           | 126  |  | 平均压强【gr/%】           | 141  |  |
|                      |      |  |                      |      |  |
| 面积【mm <sup>2</sup> 】 | 5270 |  | 面积【mm <sup>2</sup> 】 | 5547 |  |
| 后/双足【%】              | 27   |  | 后/双足【%】              | 29   |  |
| 后/全足【%】              | 57   |  | 后/全足【%】              | 54   |  |
| 最大压强【gr/%】           | 245  |  | 最大压强【gr/%】           | 248  |  |
| 平均压强【gr/%】           | 212  |  | 平均压强【gr/%】           | 214  |  |
|                      |      |  |                      |      |  |

双脚综合数据

| 左脚总和       |       | 右脚总和       |       |
|------------|-------|------------|-------|
| 面积【mm²】    | 11860 | 面积【mm²】    | 12715 |
| 负荷【%】      | 47    | 负荷【%】      | 53    |
| 最大压强【gr/%】 | 174   | 最大压强【gr/%】 | 179   |
| 平均压强【gr/%】 | 164   | 平均压强【gr/%】 | 173   |

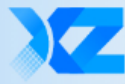

足弓类型

左脚

足弓指数 24.00%

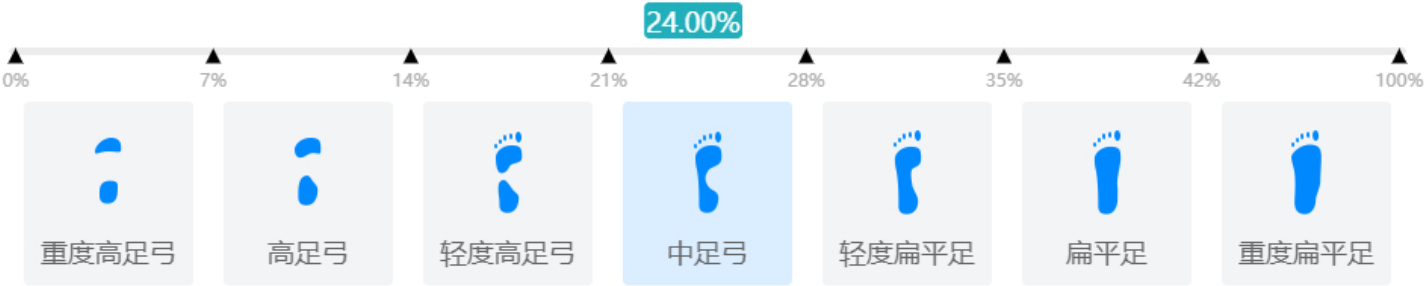

右脚

足弓指数 22.00%

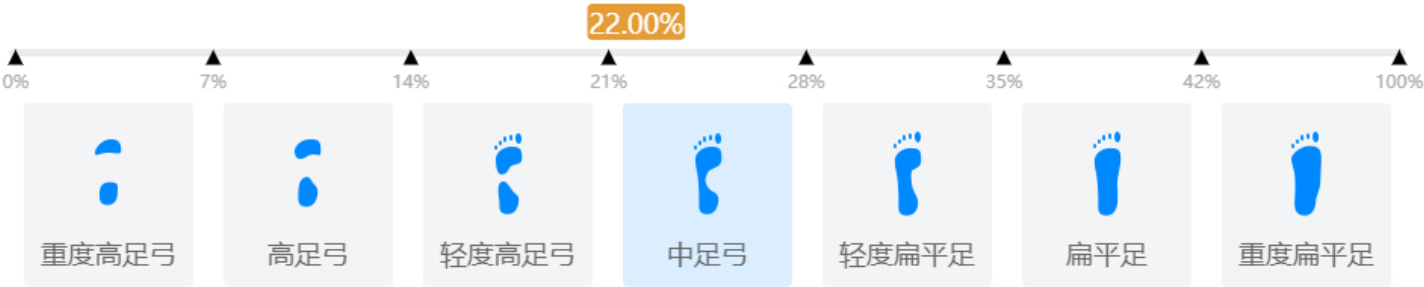

报告结论

左脚前足轻度外翻  
右脚前足轻度外翻  
身体重心过度靠后
