# Supplementary material for: Individualized Corrective Training Based on Precision Biomechanical Assessment for the Prevention of Sports Injuries in Adolescents
Source: Research Square preprint supplement (doi:10.21203/rs.3.rs-8426574/v1), 2026-02-02
Supplement: Supplementary file 67 [file 静态报告-王军艳-20250226165329.pdf › Plantar pressure and gait analysis/aerobics /静态报告-王军艳-20250226165329.pdf]

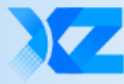

静态双脚数据

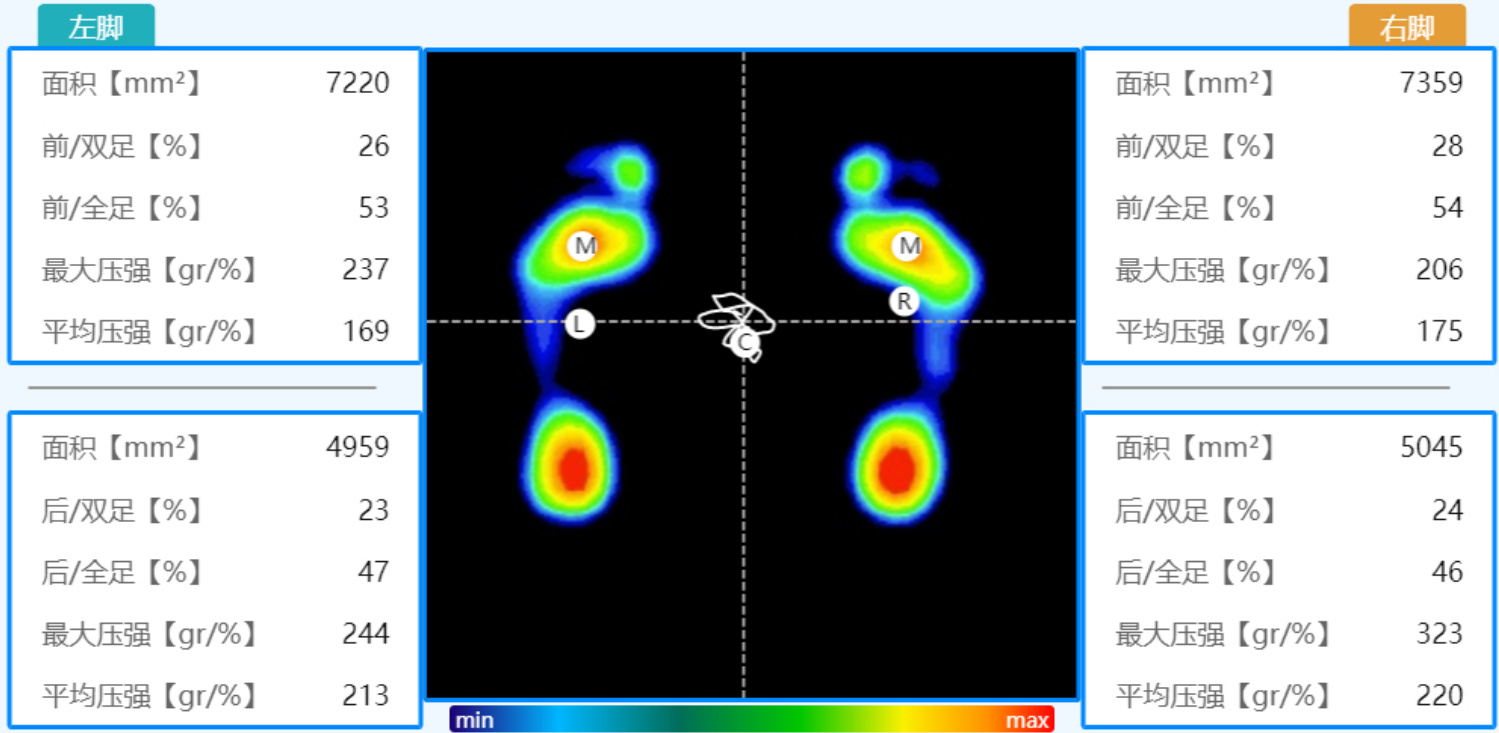

双脚综合数据

| 左脚总和                 |       | 右脚总和                 |       |
|----------------------|-------|----------------------|-------|
| 面积【mm <sup>2</sup> 】 | 12179 | 面积【mm <sup>2</sup> 】 | 12404 |
| 负荷【%】                | 49    | 负荷【%】                | 51    |
| 最大压强【gr/%】           | 211   | 最大压强【gr/%】           | 322   |
| 平均压强【gr/%】           | 188   | 平均压强【gr/%】           | 195   |

静态报告

王军艳 19岁 女 55.0kg 165.0cm 2025-2-26 15:59:20

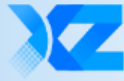

足弓类型

左脚

足弓指数 17.00%

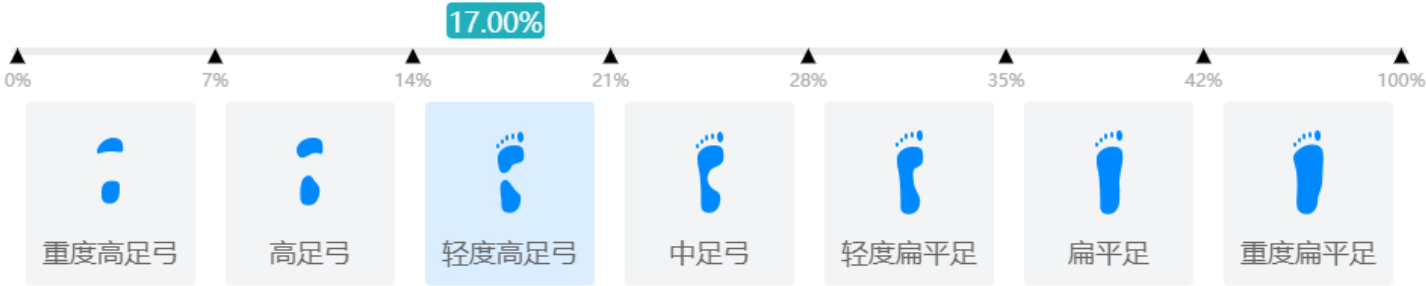

右脚

足弓指数 18.00%

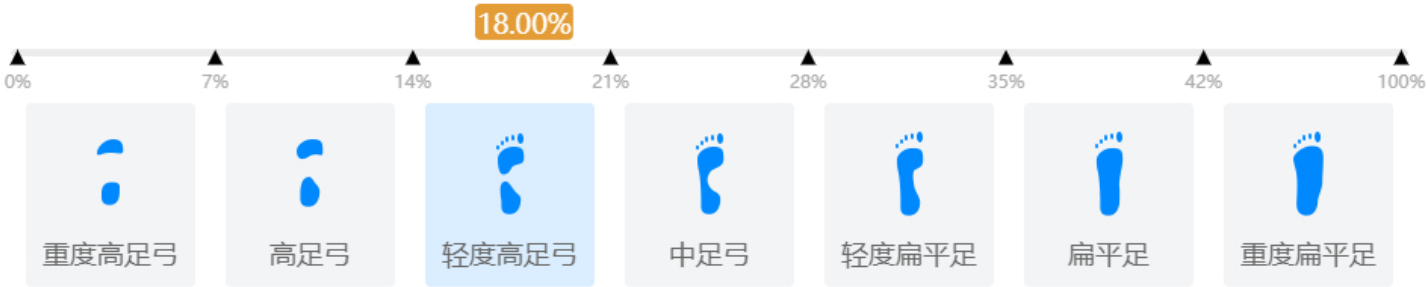

报告结论

左脚横弓塌陷  
左脚足弓偏高  
右脚横弓塌陷  
右脚足弓偏高  
身体重心过度靠后
