# Supplementary material for: Individualized Corrective Training Based on Precision Biomechanical Assessment for the Prevention of Sports Injuries in Adolescents
Source: Research Square preprint supplement (doi:10.21203/rs.3.rs-8426574/v1), 2026-02-02
Supplement: Supplementary file 68 [file 静态报告-王军艳-20250303210335.pdf › Plantar pressure and gait analysis/aerobics /静态报告-王军艳-20250303210335.pdf]

### 静态双脚数据

## 左脚

|                      |      |
|----------------------|------|
| 面积【mm <sup>2</sup> 】 | 7220 |
| 前/双足【%】              | 26   |
| 前/全足【%】              | 53   |
| 最大压强【gr/%】           | 237  |
| 平均压强【gr/%】           | 169  |

|                      |      |
|----------------------|------|
| 面积【mm <sup>2</sup> 】 | 4959 |
| 后/双足【%】              | 23   |
| 后/全足【%】              | 47   |
| 最大压强【gr/%】           | 244  |
| 平均压强【gr/%】           | 213  |

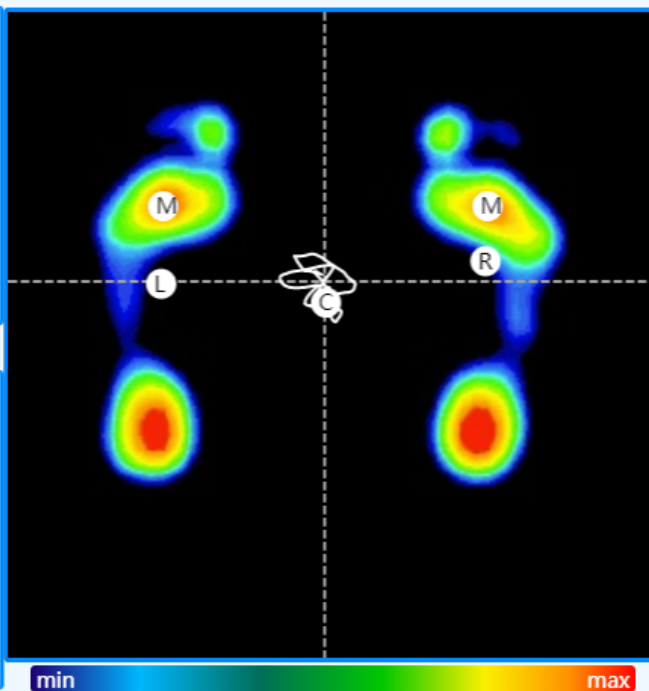

右脚

|                      |      |
|----------------------|------|
| 面积【mm <sup>2</sup> 】 | 7359 |
| 前/双足【%】              | 28   |
| 前/全足【%】              | 54   |
| 最大压强【gr/%】           | 206  |
| 平均压强【gr/%】           | 175  |

|                      |      |
|----------------------|------|
| 面积【mm <sup>2</sup> 】 | 5045 |
| 后/双足【%】              | 24   |
| 后/全足【%】              | 46   |
| 最大压强【gr/%】           | 323  |
| 平均压强【gr/%】           | 220  |

### 双脚综合数据

## 左脚总和

|                      |       |
|----------------------|-------|
| 面积【mm <sup>2</sup> 】 | 12179 |
| 负荷【%】                | 49    |
| 最大压强【gr/%】           | 211   |
| 平均压强【gr/%】           | 188   |

右脚总和

|                      |       |
|----------------------|-------|
| 面积【mm <sup>2</sup> 】 | 12404 |
| 负荷【%】                | 51    |
| 最大压强【gr/%】           | 322   |
| 平均压强【gr/%】           | 195   |

静态报告

王军艳 19岁 女 55.0kg 165.0cm 2025-2-26 15:59:20

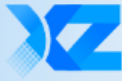

足弓类型

左脚

足弓指数 17.00%

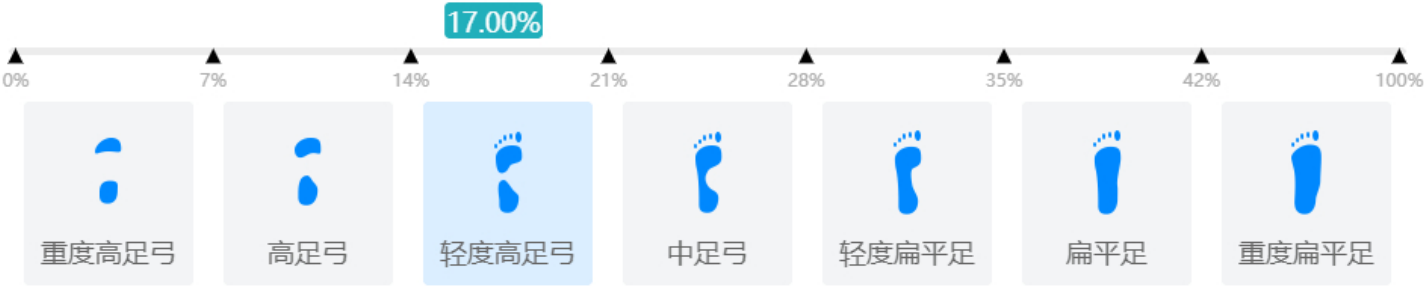

右脚

足弓指数 18.00%

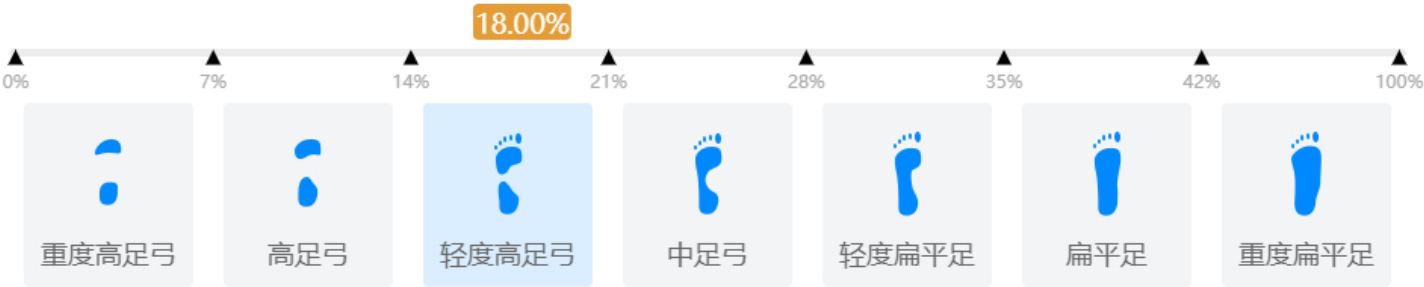

报告结论

左脚横弓塌陷  
左脚足弓偏高  
右脚横弓塌陷  
右脚足弓偏高  
身体重心过度靠后
