# Supplementary material for: Individualized Corrective Training Based on Precision Biomechanical Assessment for the Prevention of Sports Injuries in Adolescents
Source: Research Square preprint supplement (doi:10.21203/rs.3.rs-8426574/v1), 2026-02-02
Supplement: Supplementary file 69 [file 静态报告-王思奕-20250226101210.pdf › Plantar pressure and gait analysis/aerobics /静态报告-王思奕-20250226101210.pdf]

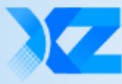

静态双脚数据

左脚

|            |      |
|------------|------|
| 面积【mm²】    | 6107 |
| 前/双足【%】    | 21   |
| 前/全足【%】    | 42   |
| 最大压强【gr/%】 | 148  |
| 平均压强【gr/%】 | 140  |

|            |      |
|------------|------|
| 面积【mm²】    | 4651 |
| 后/双足【%】    | 29   |
| 后/全足【%】    | 58   |
| 最大压强【gr/%】 | 259  |
| 平均压强【gr/%】 | 255  |

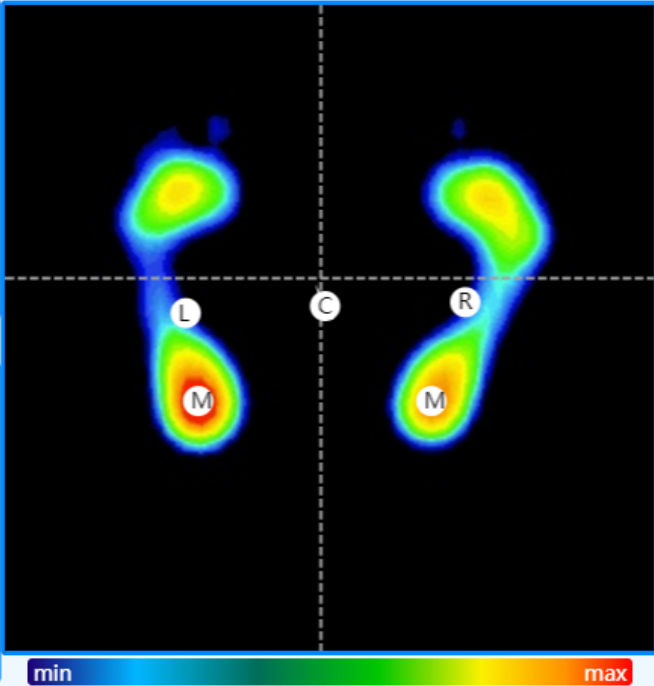

右脚

|            |      |
|------------|------|
| 面积【mm²】    | 5953 |
| 前/双足【%】    | 25   |
| 前/全足【%】    | 50   |
| 最大压强【gr/%】 | 174  |
| 平均压强【gr/%】 | 167  |

|            |      |
|------------|------|
| 面积【mm²】    | 4642 |
| 后/双足【%】    | 25   |
| 后/全足【%】    | 50   |
| 最大压强【gr/%】 | 236  |
| 平均压强【gr/%】 | 218  |

双脚综合数据

左脚总和

|            |       |
|------------|-------|
| 面积【mm²】    | 10758 |
| 负荷【%】      | 50    |
| 最大压强【gr/%】 | 194   |
| 平均压强【gr/%】 | 190   |

右脚总和

|            |       |
|------------|-------|
| 面积【mm²】    | 10595 |
| 负荷【%】      | 50    |
| 最大压强【gr/%】 | 201   |
| 平均压强【gr/%】 | 190   |



足弓类型

左脚

足弓指数 22.00%

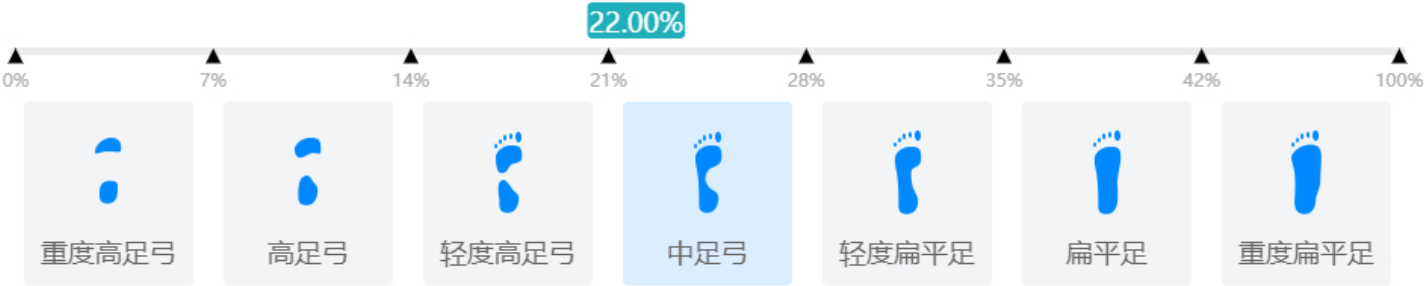

右脚

足弓指数 23.00%

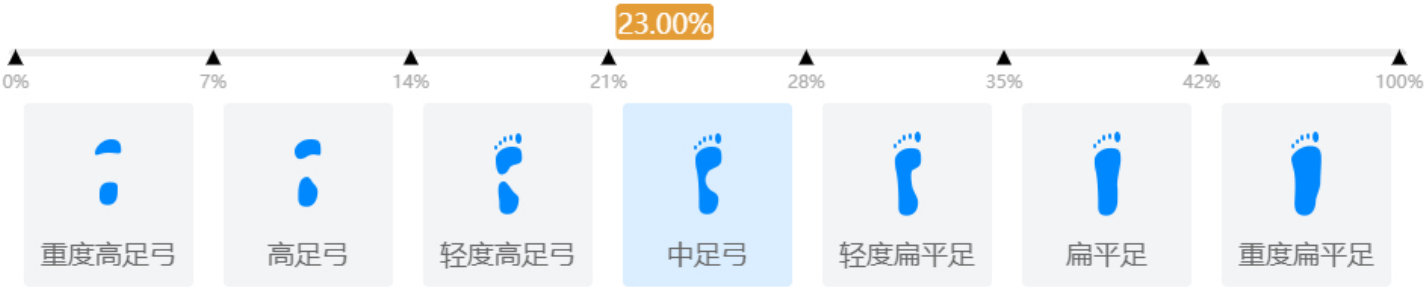

报告结论

左脚横弓塌陷  
右脚横弓塌陷  
身体重心过度靠后
