# Supplementary material for: Individualized Corrective Training Based on Precision Biomechanical Assessment for the Prevention of Sports Injuries in Adolescents
Source: Research Square preprint supplement (doi:10.21203/rs.3.rs-8426574/v1), 2026-02-02
Supplement: Supplementary file 70 [file 静态报告-王雅楠-20250226164952.pdf › Plantar pressure and gait analysis/aerobics /静态报告-王雅楠-20250226164952.pdf]

静态报告

王雅楠 20岁 女 53.0kg 168.0cm 2025-2-26 16:15:07

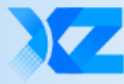

静态双脚数据

左脚

|            |      |
|------------|------|
| 面积【mm²】    | 4915 |
| 前/双足【%】    | 19   |
| 前/全足【%】    | 44   |
| 最大压强【gr/%】 | 176  |
| 平均压强【gr/%】 | 145  |

|            |      |
|------------|------|
| 面积【mm²】    | 3244 |
| 后/双足【%】    | 24   |
| 后/全足【%】    | 56   |
| 最大压强【gr/%】 | 286  |
| 平均压强【gr/%】 | 280  |

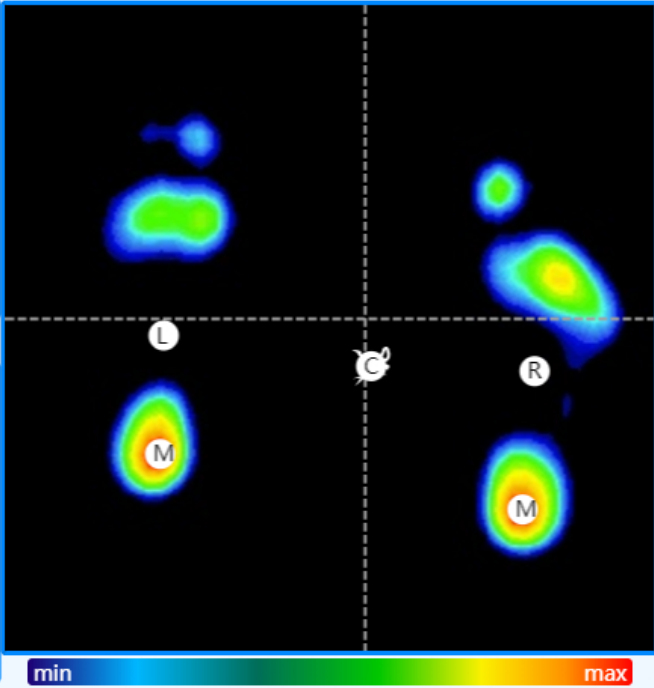

右脚

|            |      |
|------------|------|
| 面积【mm²】    | 6571 |
| 前/双足【%】    | 28   |
| 前/全足【%】    | 49   |
| 最大压强【gr/%】 | 186  |
| 平均压强【gr/%】 | 157  |

|            |      |
|------------|------|
| 面积【mm²】    | 4412 |
| 后/双足【%】    | 28   |
| 后/全足【%】    | 51   |
| 最大压强【gr/%】 | 268  |
| 平均压强【gr/%】 | 241  |

双脚综合数据

左脚总和

|            |      |
|------------|------|
| 面积【mm²】    | 8160 |
| 负荷【%】      | 44   |
| 最大压强【gr/%】 | 213  |
| 平均压强【gr/%】 | 199  |

右脚总和

|            |       |
|------------|-------|
| 面积【mm²】    | 10983 |
| 负荷【%】      | 56    |
| 最大压强【gr/%】 | 202   |
| 平均压强【gr/%】 | 190   |

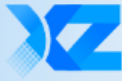

足弓类型

左脚

足弓指数 2.00%

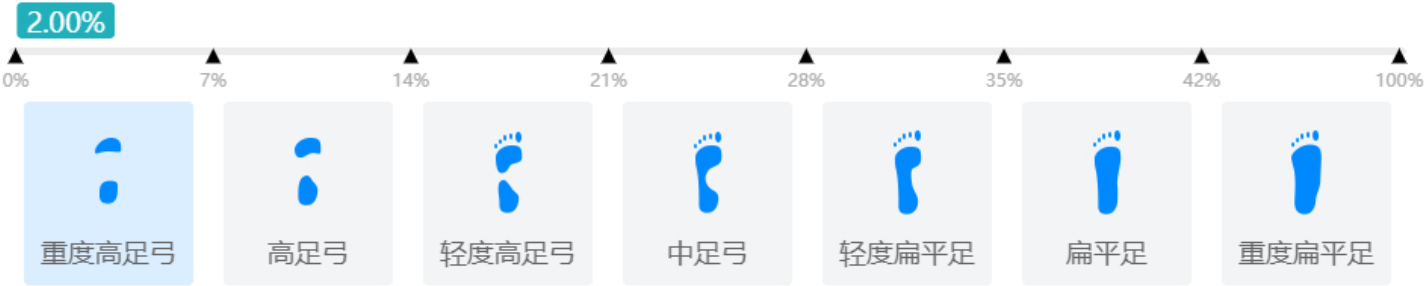

右脚

足弓指数 13.00%

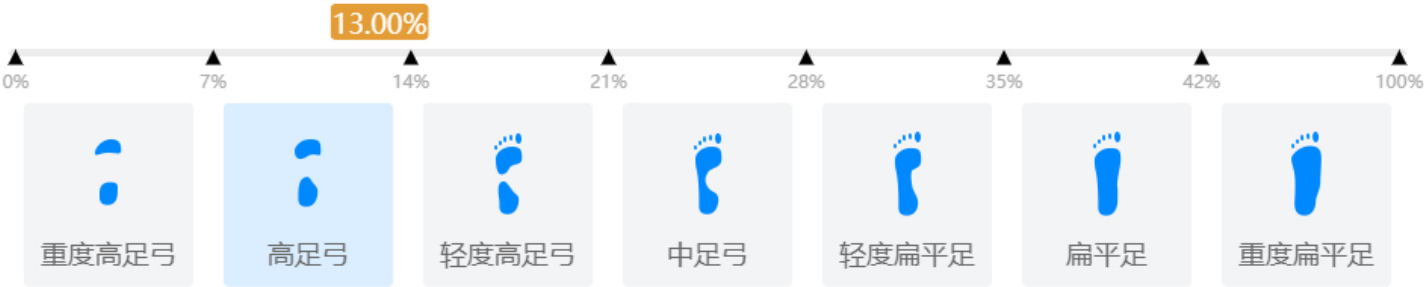

报告结论

左脚前足轻度外翻  
左脚足弓过高  
右脚横弓塌陷  
右脚足弓过高  
身体重心过度靠后  
左右侧足弓形状压力差异较大
