# Supplementary material for: Individualized Corrective Training Based on Precision Biomechanical Assessment for the Prevention of Sports Injuries in Adolescents
Source: Research Square preprint supplement (doi:10.21203/rs.3.rs-8426574/v1), 2026-02-02
Supplement: Supplementary file 71 [file 静态报告-秦甜甜-20250226145949.pdf › Plantar pressure and gait analysis/aerobics /静态报告-秦甜甜-20250226145949.pdf]

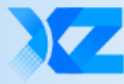

静态双脚数据

左脚

|            |      |
|------------|------|
| 面积【mm²】    | 7322 |
| 前/双足【%】    | 22   |
| 前/全足【%】    | 44   |
| 最大压强【gr/%】 | 181  |
| 平均压强【gr/%】 | 137  |

|            |      |
|------------|------|
| 面积【mm²】    | 5211 |
| 后/双足【%】    | 28   |
| 后/全足【%】    | 56   |
| 最大压强【gr/%】 | 325  |
| 平均压强【gr/%】 | 245  |

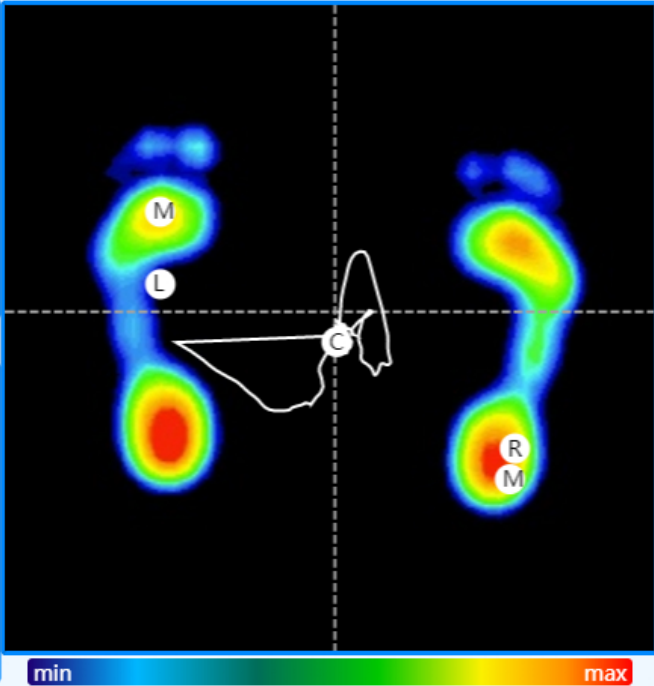

右脚

|            |      |
|------------|------|
| 面积【mm²】    | 7117 |
| 前/双足【%】    | 25   |
| 前/全足【%】    | 50   |
| 最大压强【gr/%】 | 250  |
| 平均压强【gr/%】 | 160  |

|            |      |
|------------|------|
| 面积【mm²】    | 5273 |
| 后/双足【%】    | 25   |
| 后/全足【%】    | 50   |
| 最大压强【gr/%】 | 288  |
| 平均压强【gr/%】 | 220  |

双脚综合数据

左脚总和

|            |       |
|------------|-------|
| 面积【mm²】    | 12533 |
| 负荷【%】      | 49    |
| 最大压强【gr/%】 | 261   |
| 平均压强【gr/%】 | 183   |

右脚总和

|            |       |
|------------|-------|
| 面积【mm²】    | 12389 |
| 负荷【%】      | 51    |
| 最大压强【gr/%】 | 237   |
| 平均压强【gr/%】 | 188   |

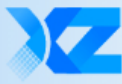

足弓类型

左脚

足弓指数 20.00%

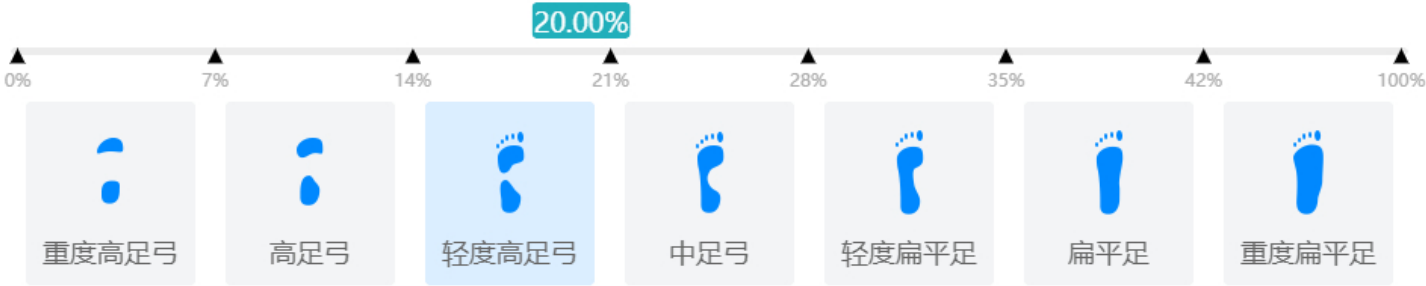

右脚

足弓指数 21.00%

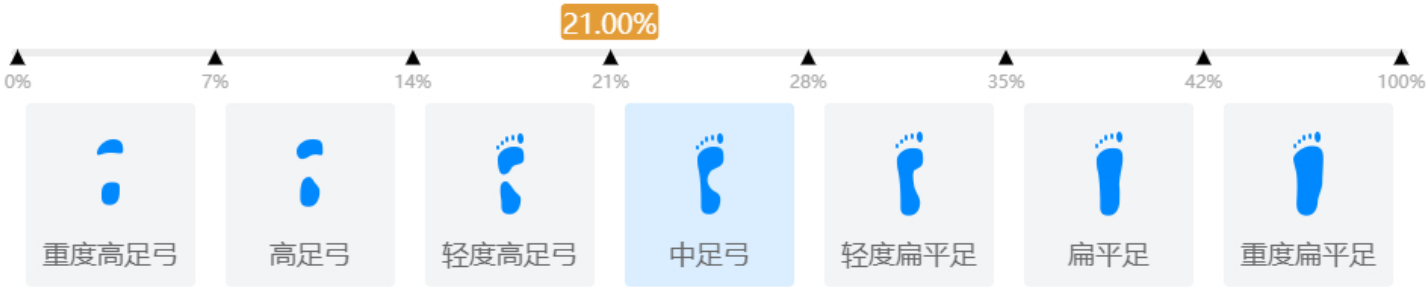

报告结论

左脚横弓塌陷  
左脚足弓偏高  
右脚横弓塌陷  
身体重心过度靠后
