# Supplementary material for: Individualized Corrective Training Based on Precision Biomechanical Assessment for the Prevention of Sports Injuries in Adolescents
Source: Research Square preprint supplement (doi:10.21203/rs.3.rs-8426574/v1), 2026-02-02
Supplement: Supplementary file 72 [file 静态报告-蒋天虹-20250226141044.pdf › Plantar pressure and gait analysis/aerobics /静态报告-蒋天虹-20250226141044.pdf]

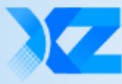

静态双脚数据

左脚

|            |      |
|------------|------|
| 面积【mm²】    | 5184 |
| 前/双足【%】    | 19   |
| 前/全足【%】    | 39   |
| 最大压强【gr/%】 | 130  |
| 平均压强【gr/%】 | 124  |

|            |      |
|------------|------|
| 面积【mm²】    | 4201 |
| 后/双足【%】    | 29   |
| 后/全足【%】    | 61   |
| 最大压强【gr/%】 | 240  |
| 平均压强【gr/%】 | 237  |

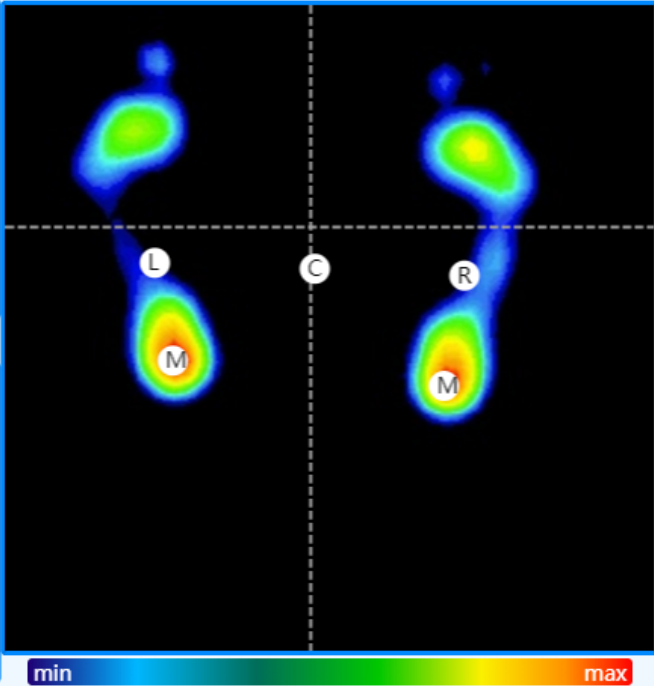

右脚

|            |      |
|------------|------|
| 面积【mm²】    | 5767 |
| 前/双足【%】    | 23   |
| 前/全足【%】    | 45   |
| 最大压强【gr/%】 | 143  |
| 平均压强【gr/%】 | 135  |

|            |      |
|------------|------|
| 面积【mm²】    | 4311 |
| 后/双足【%】    | 29   |
| 后/全足【%】    | 55   |
| 最大压强【gr/%】 | 230  |
| 平均压强【gr/%】 | 226  |

双脚综合数据

左脚总和

|            |      |
|------------|------|
| 面积【mm²】    | 9385 |
| 负荷【%】      | 48   |
| 最大压强【gr/%】 | 178  |
| 平均压强【gr/%】 | 174  |

右脚总和

|            |       |
|------------|-------|
| 面积【mm²】    | 10078 |
| 负荷【%】      | 52    |
| 最大压强【gr/%】 | 178   |
| 平均压强【gr/%】 | 174   |

静态报告

蒋天虹 20岁 女 42.0kg 158.0cm 2025-2-26 14:10:12

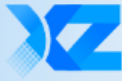

足弓类型

左脚

足弓指数 18.00%

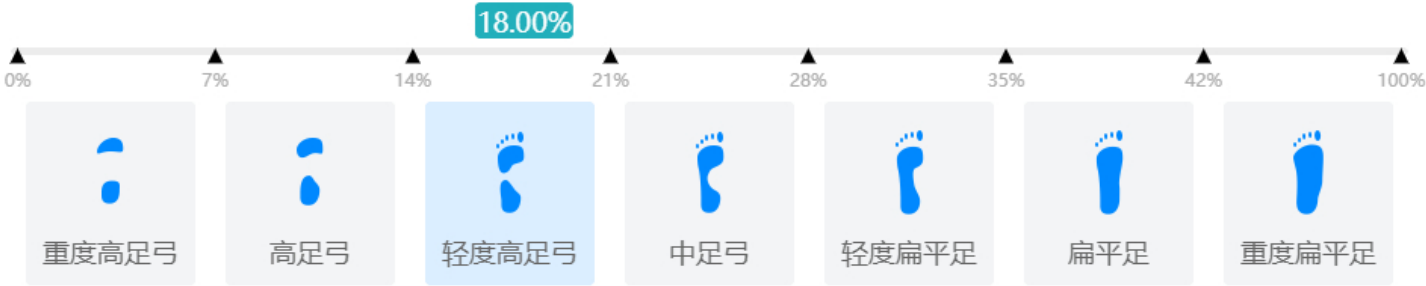

右脚

足弓指数 22.00%

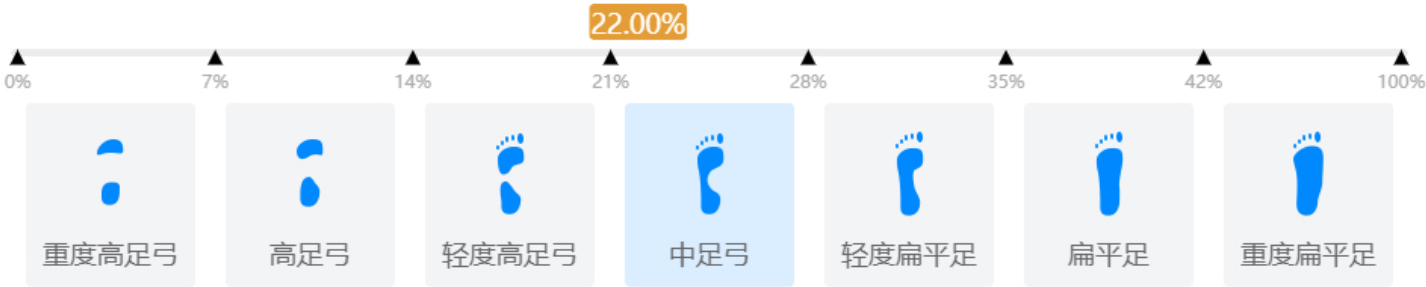

报告结论

左脚横弓塌陷  
左脚足弓偏高  
右脚横弓塌陷  
身体重心过度靠后  
左右侧足弓形状压力差异较大
