# Supplementary material for: Individualized Corrective Training Based on Precision Biomechanical Assessment for the Prevention of Sports Injuries in Adolescents
Source: Research Square preprint supplement (doi:10.21203/rs.3.rs-8426574/v1), 2026-02-02
Supplement: Supplementary file 74 [file 静态报告-马柯辉-20250226095414.pdf › Plantar pressure and gait analysis/aerobics /静态报告-马柯辉-20250226095414.pdf]

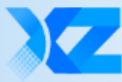

静态双脚数据

左脚

|            |      |
|------------|------|
| 面积【mm²】    | 7059 |
| 前/双足【%】    | 27   |
| 前/全足【%】    | 54   |
| 最大压强【gr/%】 | 187  |
| 平均压强【gr/%】 | 163  |

|            |      |
|------------|------|
| 面积【mm²】    | 5214 |
| 后/双足【%】    | 23   |
| 后/全足【%】    | 46   |
| 最大压强【gr/%】 | 195  |
| 平均压强【gr/%】 | 188  |

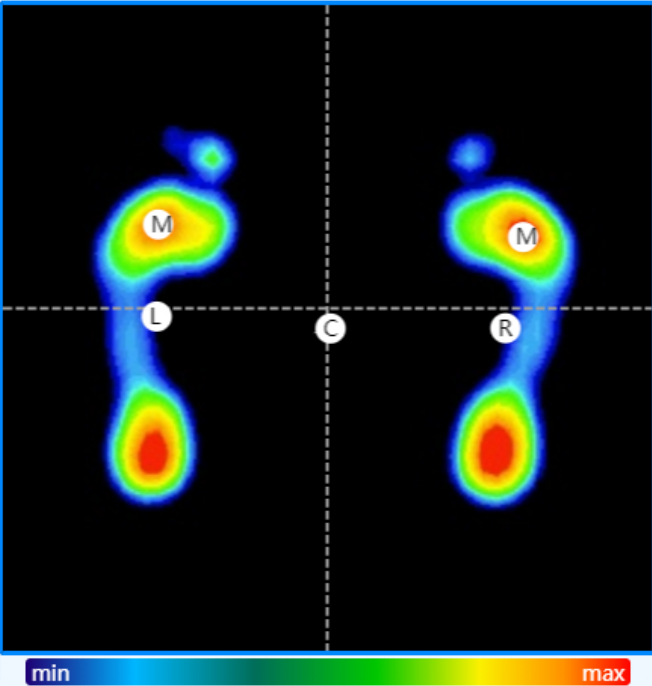

右脚

|            |      |
|------------|------|
| 面积【mm²】    | 6603 |
| 前/双足【%】    | 25   |
| 前/全足【%】    | 51   |
| 最大压强【gr/%】 | 165  |
| 平均压强【gr/%】 | 163  |

|            |      |
|------------|------|
| 面积【mm²】    | 5156 |
| 后/双足【%】    | 24   |
| 后/全足【%】    | 49   |
| 最大压强【gr/%】 | 208  |
| 平均压强【gr/%】 | 201  |

双脚综合数据

左脚总和

|            |       |
|------------|-------|
| 面积【mm²】    | 12273 |
| 负荷【%】      | 50    |
| 最大压强【gr/%】 | 184   |
| 平均压强【gr/%】 | 173   |

右脚总和

|            |       |
|------------|-------|
| 面积【mm²】    | 11759 |
| 负荷【%】      | 50    |
| 最大压强【gr/%】 | 182   |
| 平均压强【gr/%】 | 179   |

静态报告

马柯辉 19岁 女 48.0kg 158.0cm 2025-2-26 09:53:25

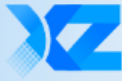

足弓类型

左脚

足弓指数 20.00%

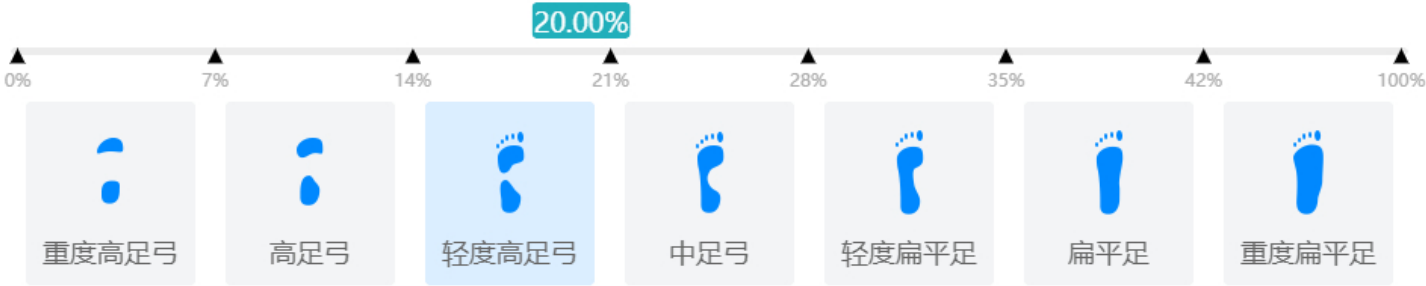

右脚

足弓指数 21.00%

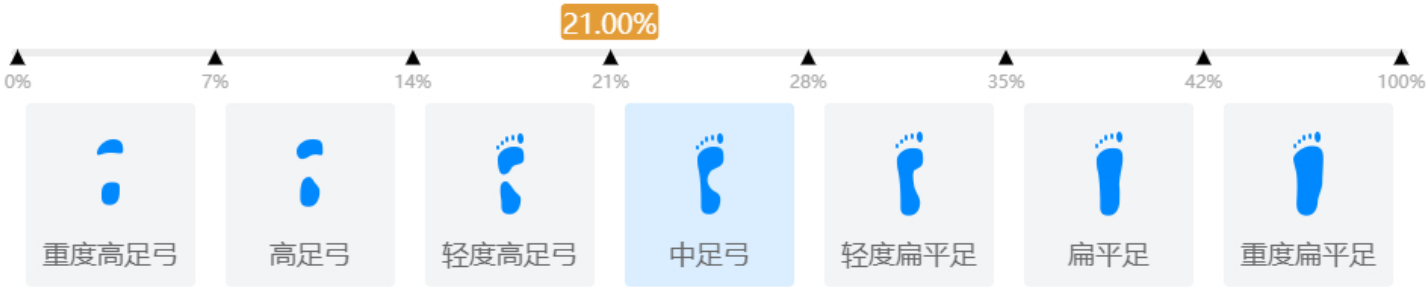

报告结论

左脚横弓塌陷  
左脚足弓偏高  
右脚横弓塌陷  
身体重心过度靠后
