# Supplementary material for: Individualized Corrective Training Based on Precision Biomechanical Assessment for the Prevention of Sports Injuries in Adolescents
Source: Research Square preprint supplement (doi:10.21203/rs.3.rs-8426574/v1), 2026-02-02
Supplement: Supplementary file 76 [file 动态报告-丁红丽-20250226135623.pdf › Plantar pressure and gait analysis/jump rope/动态报告-丁红丽-20250226135623.pdf]

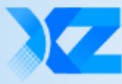

左右脚动态数据

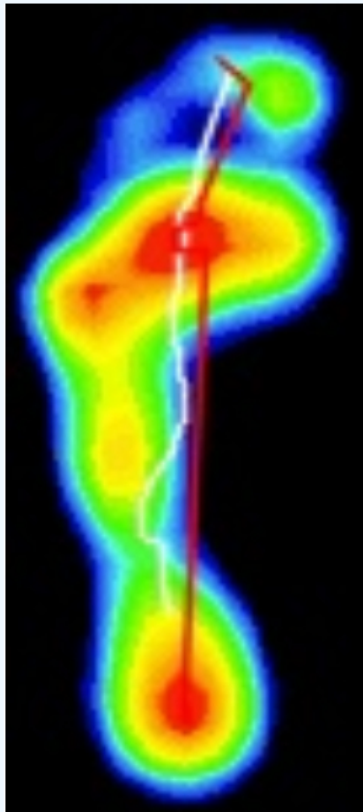

| 第2步      | Cop数据     | 第1步      |
|----------|-----------|----------|
| 196.52   | cop距离【mm】 | 149.05   |
| -4.56    | 步偏脚【°】    | -1.72    |
| 9602.26  | 面积【mm²】   | 9099.67  |
| 20698.23 | 压力【kgf】   | 20009.69 |
| 2.05     | 压强【gr/%】  | 2.06     |
| 28917.54 | 最大压力【kgf】 | 29569.34 |
| 0.15     | 速度【mm/ms】 | 0.14     |

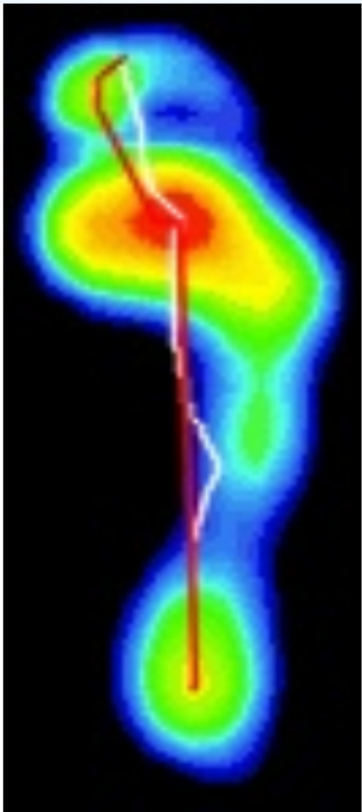

支撑相

左脚

|             |          |
|-------------|----------|
| ● 着地期 4%    |          |
| 时长【ms】      | 48.00    |
| 平均速度【mm/ms】 | 0.73     |
| 最大面积【mm²】   | 2597.85  |
| 最大压力【kgf】   | 2532.41  |
| ● 平足期 83%   |          |
| 时长【ms】      | 1112.00  |
| 平均速度【mm/ms】 | 0.11     |
| 最大面积【mm²】   | 13158.90 |
| 最大压力【kgf】   | 29312.40 |
| ● 蹬伸期 14%   |          |
| 时长【ms】      | 188.00   |
| 平均速度【mm/ms】 | 0.24     |
| 最大面积【mm²】   | 6956.10  |
| 最大压力【kgf】   | 17303.93 |

右脚

|             |          |
|-------------|----------|
| ● 着地期 5%    |          |
| 时长【ms】      | 28.00    |
| 平均速度【mm/ms】 | 0.01     |
| 最大面积【mm²】   | 1119.15  |
| 最大压力【kgf】   | 760.71   |
| ● 平足期 87%   |          |
| 时长【ms】      | 1043.33  |
| 平均速度【mm/ms】 | 0.13     |
| 最大面积【mm²】   | 11475.38 |
| 最大压力【kgf】   | 25357.53 |
| ● 蹬伸期 11%   |          |
| 时长【ms】      | 144.00   |
| 平均速度【mm/ms】 | 0.18     |
| 最大面积【mm²】   | 4032.90  |
| 最大压力【kgf】   | 6134.52  |

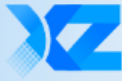

内外翻

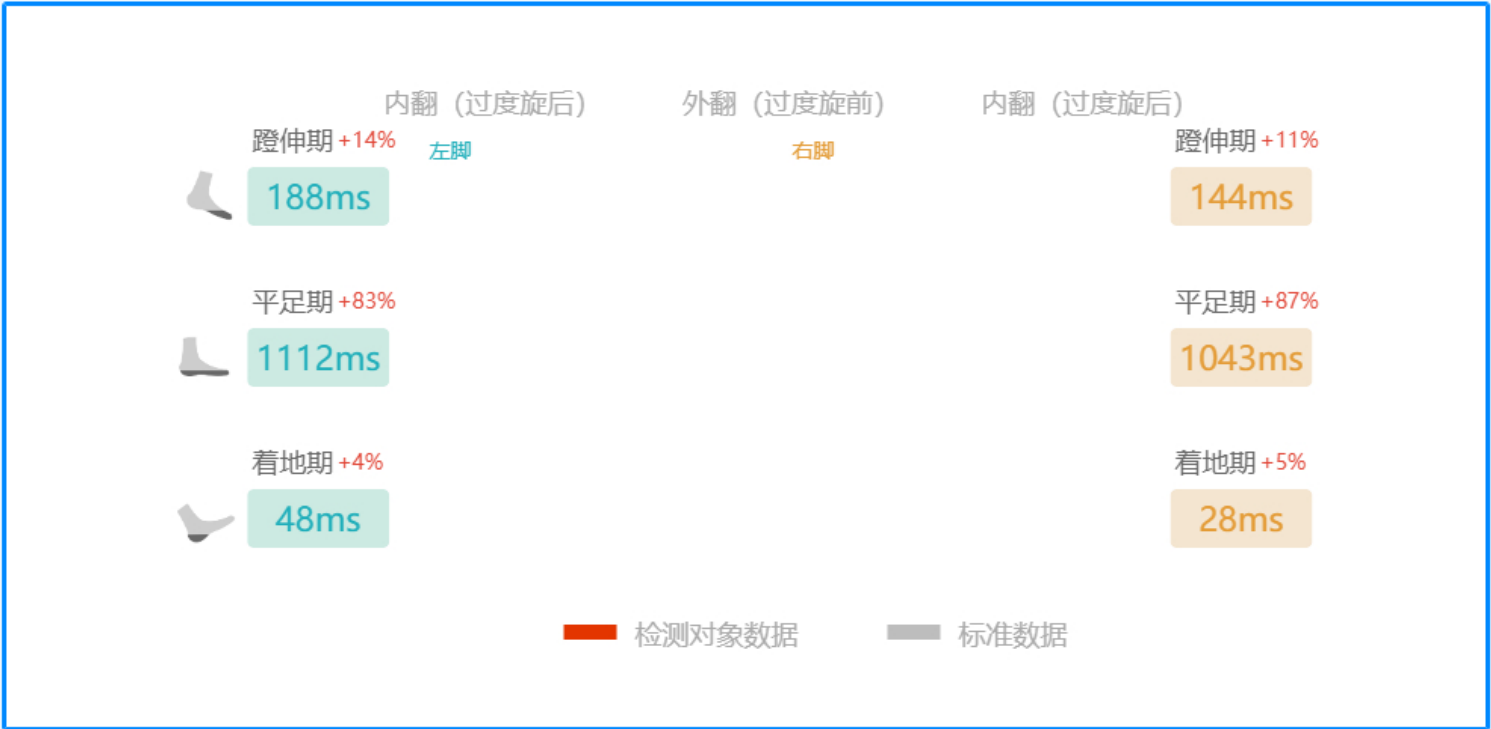

足弓类型

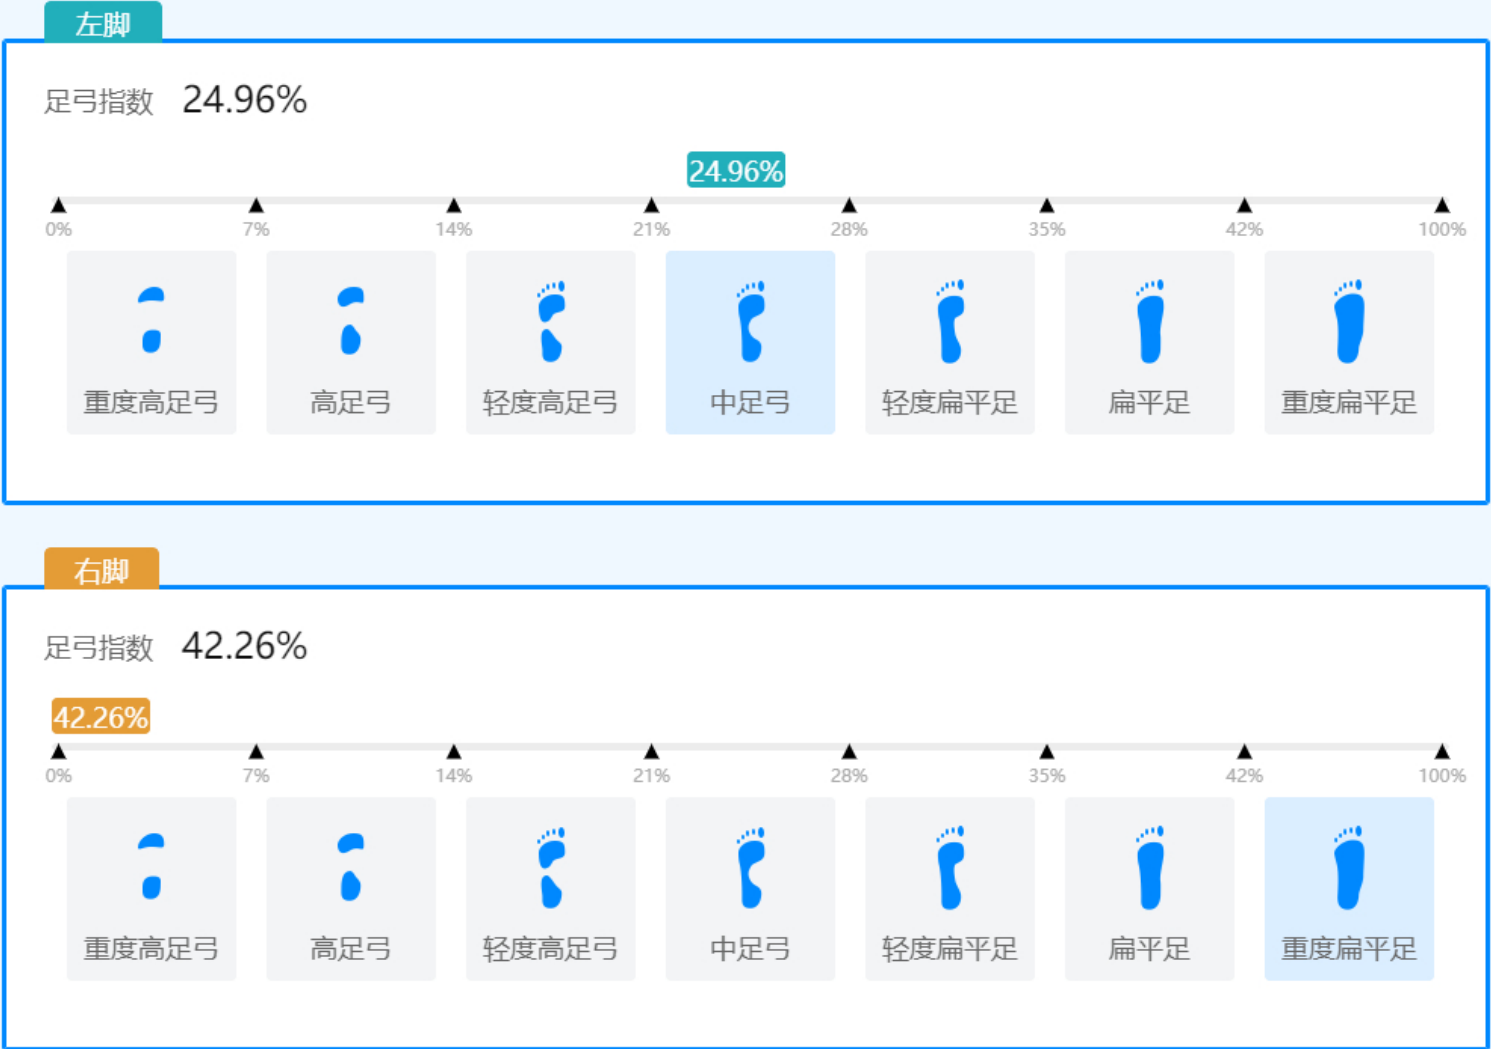



报告结论
