# Supplementary material for: Individualized Corrective Training Based on Precision Biomechanical Assessment for the Prevention of Sports Injuries in Adolescents
Source: Research Square preprint supplement (doi:10.21203/rs.3.rs-8426574/v1), 2026-02-02
Supplement: Supplementary file 77 [file 动态报告-冯佳琳-20250226155517.pdf › Plantar pressure and gait analysis/jump rope/动态报告-冯佳琳-20250226155517.pdf]

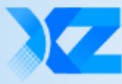

左右脚动态数据

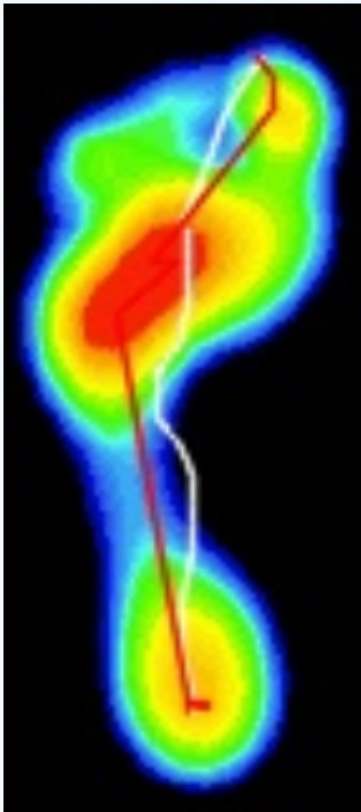

| 第2步      | Cop数据     | 第1步      |
|----------|-----------|----------|
| 208.58   | cop距离【mm】 | 166.15   |
| 5.97     | 步偏脚【°】    | 0.00     |
| 10367.19 | 面积【mm²】   | 9947.96  |
| 27267.52 | 压力【kgf】   | 26914.65 |
| 2.43     | 压强【gr/%】  | 2.54     |
| 39842.17 | 最大压力【kgf】 | 37708.86 |
| 0.16     | 速度【mm/ms】 | 0.15     |

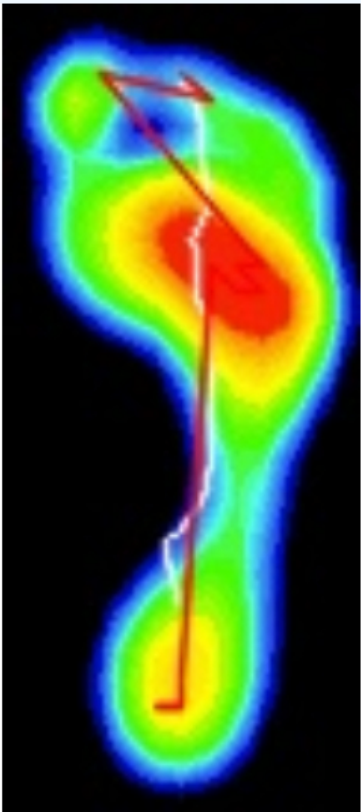

支撑相

左脚

|             |          |
|-------------|----------|
| ● 着地期 10%   |          |
| 时长【ms】      | 115.00   |
| 平均速度【mm/ms】 | 0.09     |
| 最大面积【mm²】   | 3480.19  |
| 最大压力【kgf】   | 7929.54  |
| ● 平足期 81%   |          |
| 时长【ms】      | 980.00   |
| 平均速度【mm/ms】 | 0.16     |
| 最大面积【mm²】   | 14294.25 |
| 最大压力【kgf】   | 39282.98 |
| ● 蹬伸期 10%   |          |
| 时长【ms】      | 120.00   |
| 平均速度【mm/ms】 | 0.26     |
| 最大面积【mm²】   | 5131.69  |
| 最大压力【kgf】   | 8101.99  |

右脚

|             |          |
|-------------|----------|
| ● 着地期 5%    |          |
| 时长【ms】      | 53.33    |
| 平均速度【mm/ms】 | 0.05     |
| 最大面积【mm²】   | 2977.50  |
| 最大压力【kgf】   | 6330.59  |
| ● 平足期 91%   |          |
| 时长【ms】      | 1005.00  |
| 平均速度【mm/ms】 | 0.15     |
| 最大面积【mm²】   | 13413.94 |
| 最大压力【kgf】   | 38445.70 |
| ● 蹬伸期 5%    |          |
| 时长【ms】      | 55.00    |
| 平均速度【mm/ms】 | 0.21     |
| 最大面积【mm²】   | 4038.75  |
| 最大压力【kg/f】  | 4610.54  |

内外翻

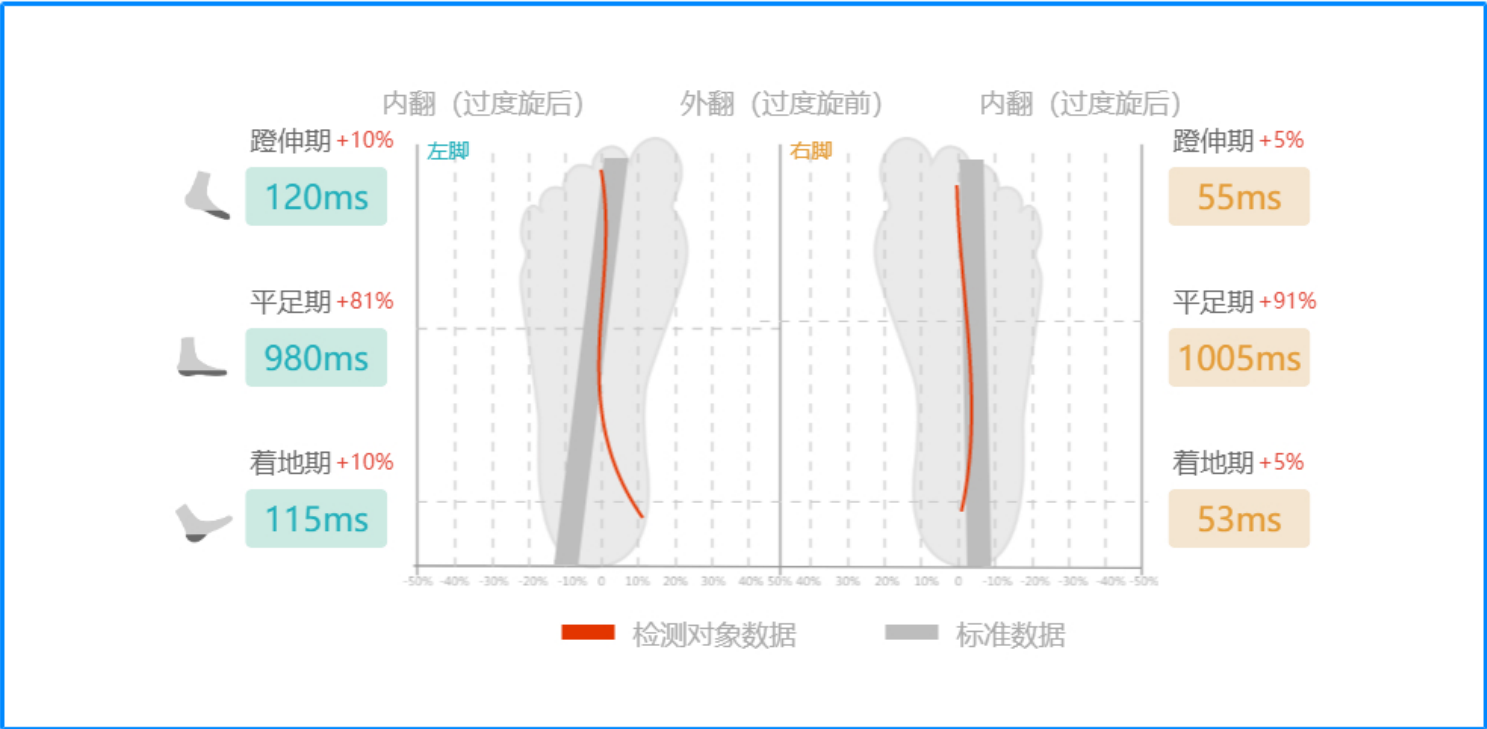

足弓类型

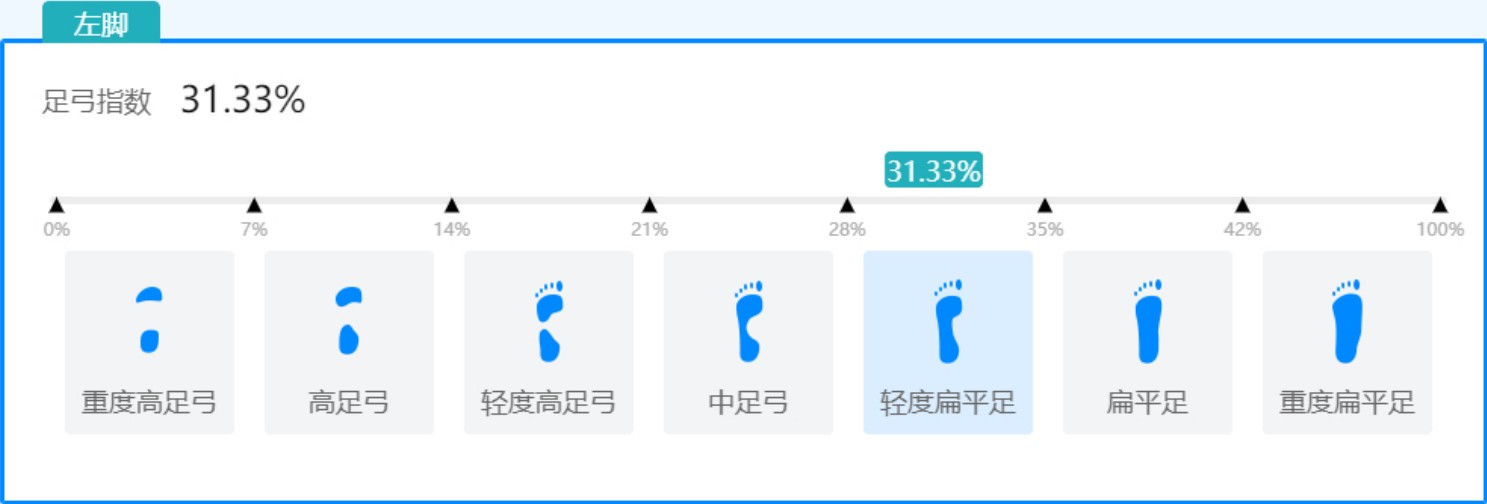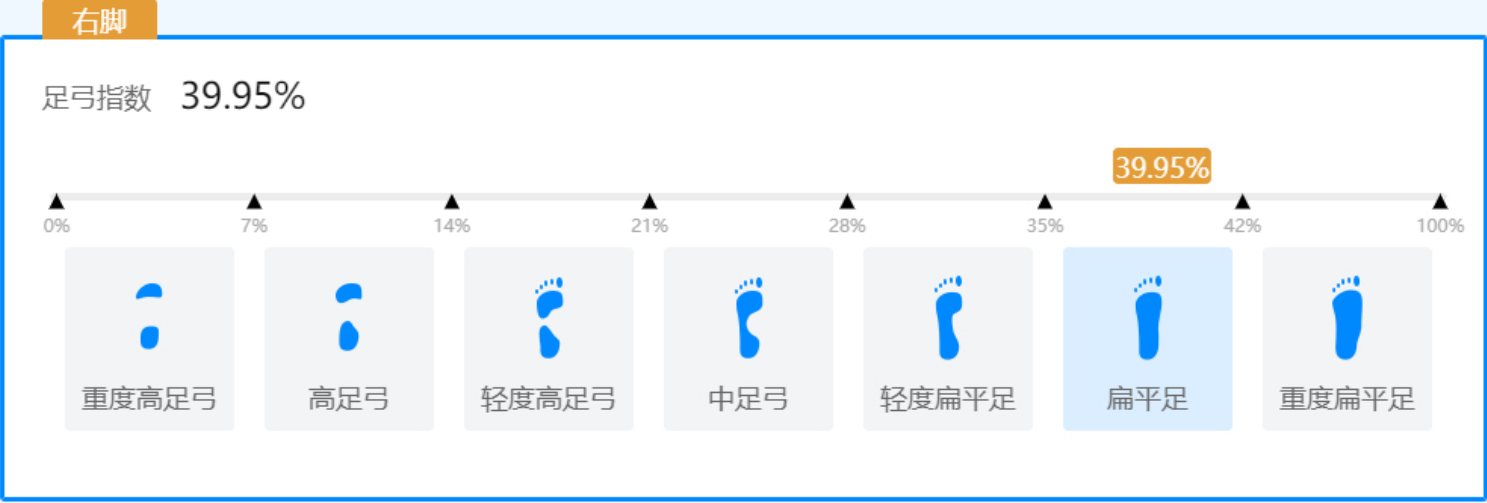

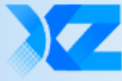

报告结论
