# Supplementary material for: Individualized Corrective Training Based on Precision Biomechanical Assessment for the Prevention of Sports Injuries in Adolescents
Source: Research Square preprint supplement (doi:10.21203/rs.3.rs-8426574/v1), 2026-02-02
Supplement: Supplementary file 78 [file 动态报告-张文茹-20250226125015.pdf › Plantar pressure and gait analysis/jump rope/动态报告-张文茹-20250226125015.pdf]

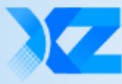

左右脚动态数据

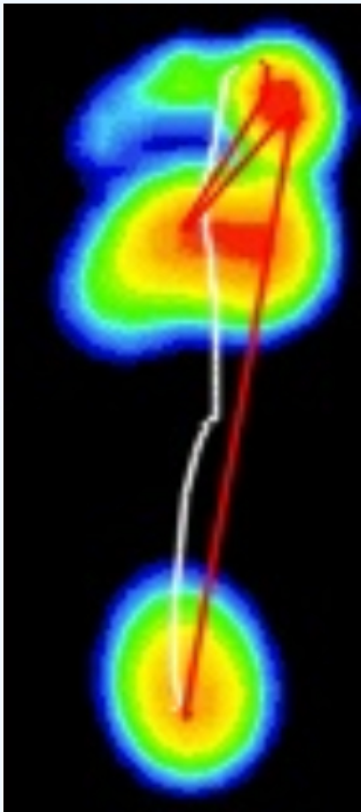

| 第1步      | Cop数据     | 第2步      |
|----------|-----------|----------|
| 197.97   | cop距离【mm】 | 211.37   |
| -0.26    | 步偏脚【°】    | 1.53     |
| 8672.08  | 面积【mm²】   | 7595.25  |
| 21080.59 | 压力【kgf】   | 18547.72 |
| 2.30     | 压强【gr/%】  | 2.28     |
| 28534.15 | 最大压力【kgf】 | 32144.04 |
| 0.20     | 速度【mm/ms】 | 0.21     |

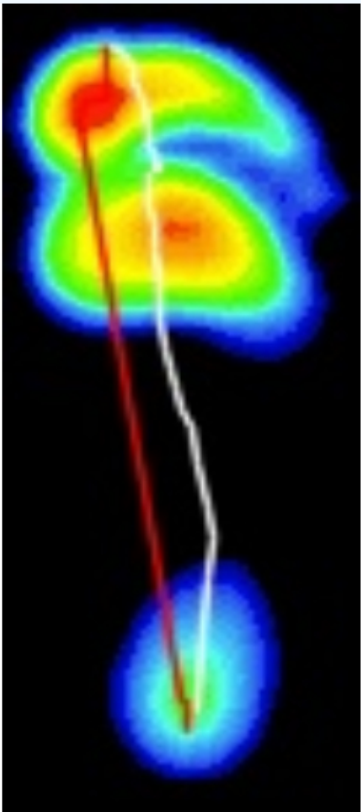

支撑相

左脚

|             |          |
|-------------|----------|
| ● 着地期 5%    |          |
| 时长【ms】      | 46.67    |
| 平均速度【mm/ms】 | 0.06     |
| 最大面积【mm²】   | 2492.63  |
| 最大压力【kgf】   | 4839.76  |
| ● 平足期 85%   |          |
| 时长【ms】      | 736.67   |
| 平均速度【mm/ms】 | 0.21     |
| 最大面积【mm²】   | 13600.13 |
| 最大压力【kgf】   | 34788.20 |
| ● 蹬伸期 10%   |          |
| 时长【ms】      | 90.00    |
| 平均速度【mm/ms】 | 0.30     |
| 最大面积【mm²】   | 4412.25  |
| 最大压力【kgf】   | 7569.42  |

右脚

|             |          |
|-------------|----------|
| ● 着地期 10%   |          |
| 时长【ms】      | 86.67    |
| 平均速度【mm/ms】 | 0.10     |
| 最大面积【mm²】   | 3338.63  |
| 最大压力【kgf】   | 8613.83  |
| ● 平足期 82%   |          |
| 时长【ms】      | 760.00   |
| 平均速度【mm/ms】 | 0.21     |
| 最大面积【mm²】   | 13711.88 |
| 最大压力【kgf】   | 34224.89 |
| ● 蹬伸期 9%    |          |
| 时长【ms】      | 80.00    |
| 平均速度【mm/ms】 | 0.23     |
| 最大面积【mm²】   | 4245.00  |
| 最大压力【kg/f】  | 6419.76  |

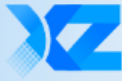

内外翻

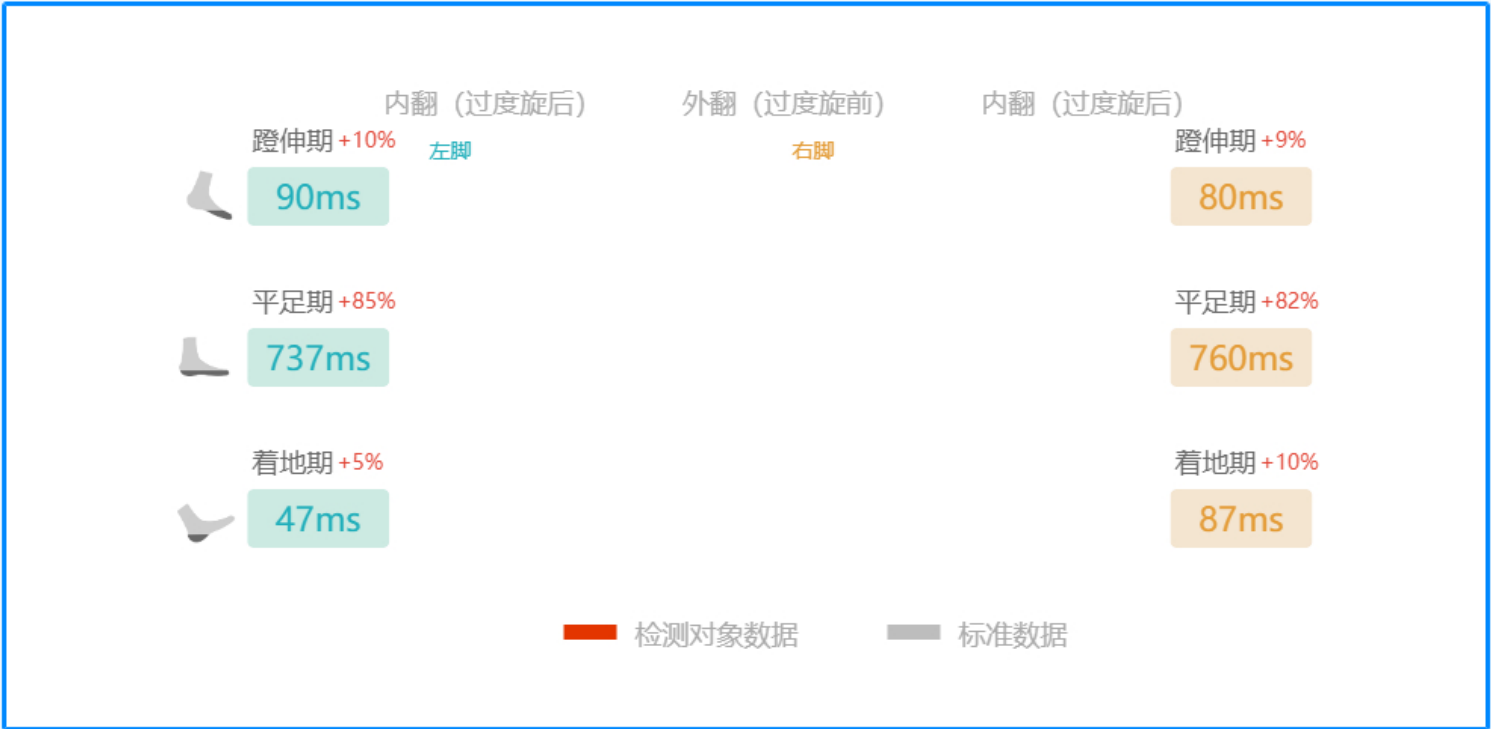

足弓类型

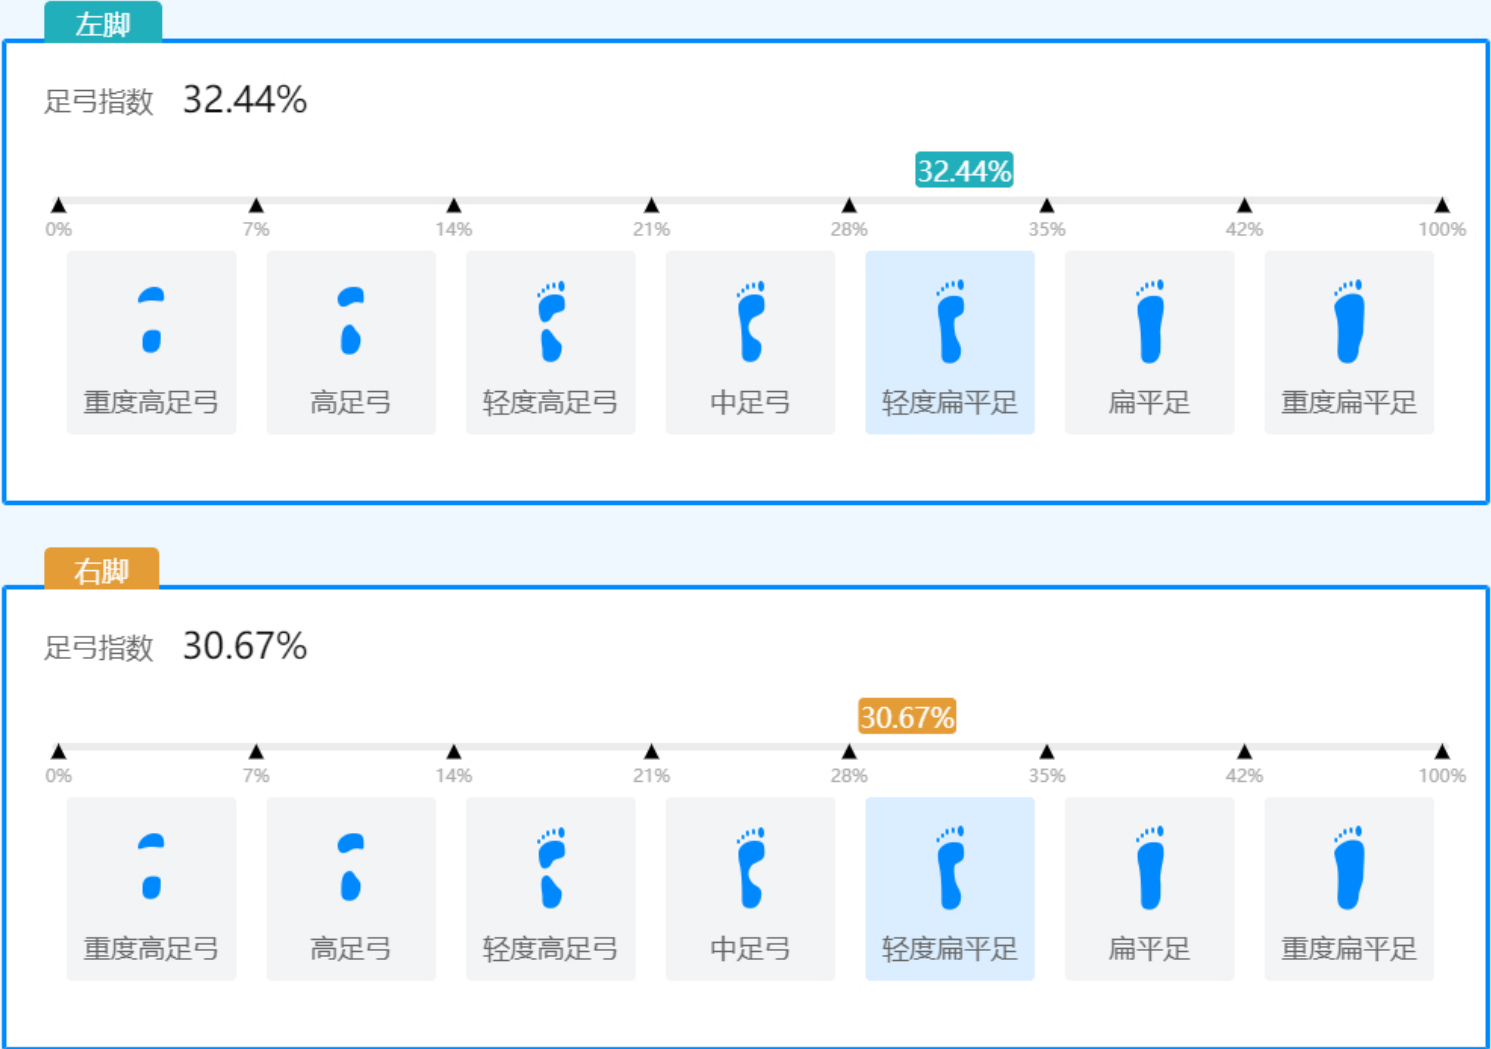

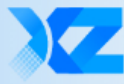

报告结论
