# Supplementary material for: Individualized Corrective Training Based on Precision Biomechanical Assessment for the Prevention of Sports Injuries in Adolescents
Source: Research Square preprint supplement (doi:10.21203/rs.3.rs-8426574/v1), 2026-02-02
Supplement: Supplementary file 80 [file 动态报告-张译丹-20250226164259.pdf › Plantar pressure and gait analysis/jump rope/动态报告-张译丹-20250226164259.pdf]

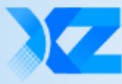

左右脚动态数据

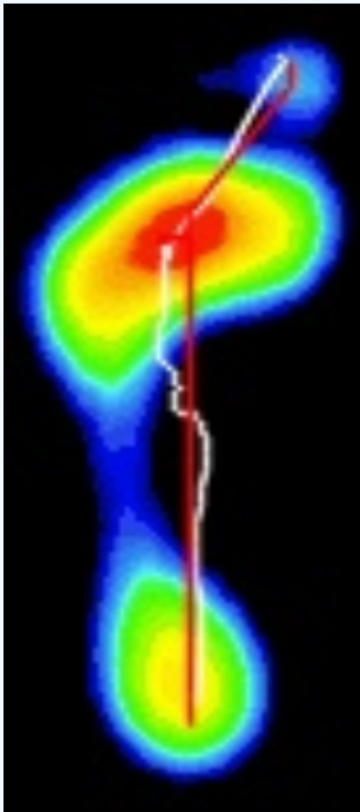

| 第2步      | Cop数据     | 第1步      |
|----------|-----------|----------|
| 214.19   | cop距离【mm】 | 240.37   |
| 6.19     | 步偏脚【°】    | 4.42     |
| 8965.16  | 面积【mm²】   | 8353.26  |
| 23059.26 | 压力【kgf】   | 20416.81 |
| 2.43     | 压强【gr/%】  | 2.22     |
| 33820.95 | 最大压力【kgf】 | 32718.22 |
| 0.16     | 速度【mm/ms】 | 0.16     |

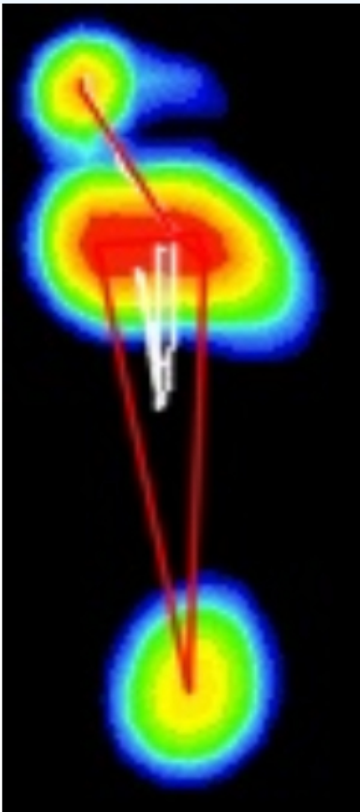

支撑相

左脚

|             |          |
|-------------|----------|
| ● 着地期 11%   |          |
| 时长【ms】      | 125.00   |
| 平均速度【mm/ms】 | 0.29     |
| 最大面积【mm²】   | 5229.00  |
| 最大压力【kgf】   | 11560.90 |
| ● 平足期 76%   |          |
| 时长【ms】      | 855.00   |
| 平均速度【mm/ms】 | 0.13     |
| 最大面积【mm²】   | 12225.38 |
| 最大压力【kgf】   | 32895.93 |
| ● 蹬伸期 13%   |          |
| 时长【ms】      | 145.00   |
| 平均速度【mm/ms】 | 0.37     |
| 最大面积【mm²】   | 6441.19  |
| 最大压力【kgf】   | 17394.08 |

右脚

|             |          |
|-------------|----------|
| ● 着地期 23%   |          |
| 时长【ms】      | 144.00   |
| 平均速度【mm/ms】 | 0.40     |
| 最大面积【mm²】   | 6666.75  |
| 最大压力【kgf】   | 11623.77 |
| ● 平足期 62%   |          |
| 时长【ms】      | 640.00   |
| 平均速度【mm/ms】 | 0.11     |
| 最大面积【mm²】   | 11836.80 |
| 最大压力【kgf】   | 30591.84 |
| ● 蹬伸期 18%   |          |
| 时长【ms】      | 210.00   |
| 平均速度【mm/ms】 | 0.27     |
| 最大面积【mm²】   | 6882.75  |
| 最大压力【kg/f】  | 18206.79 |

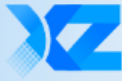

内外翻

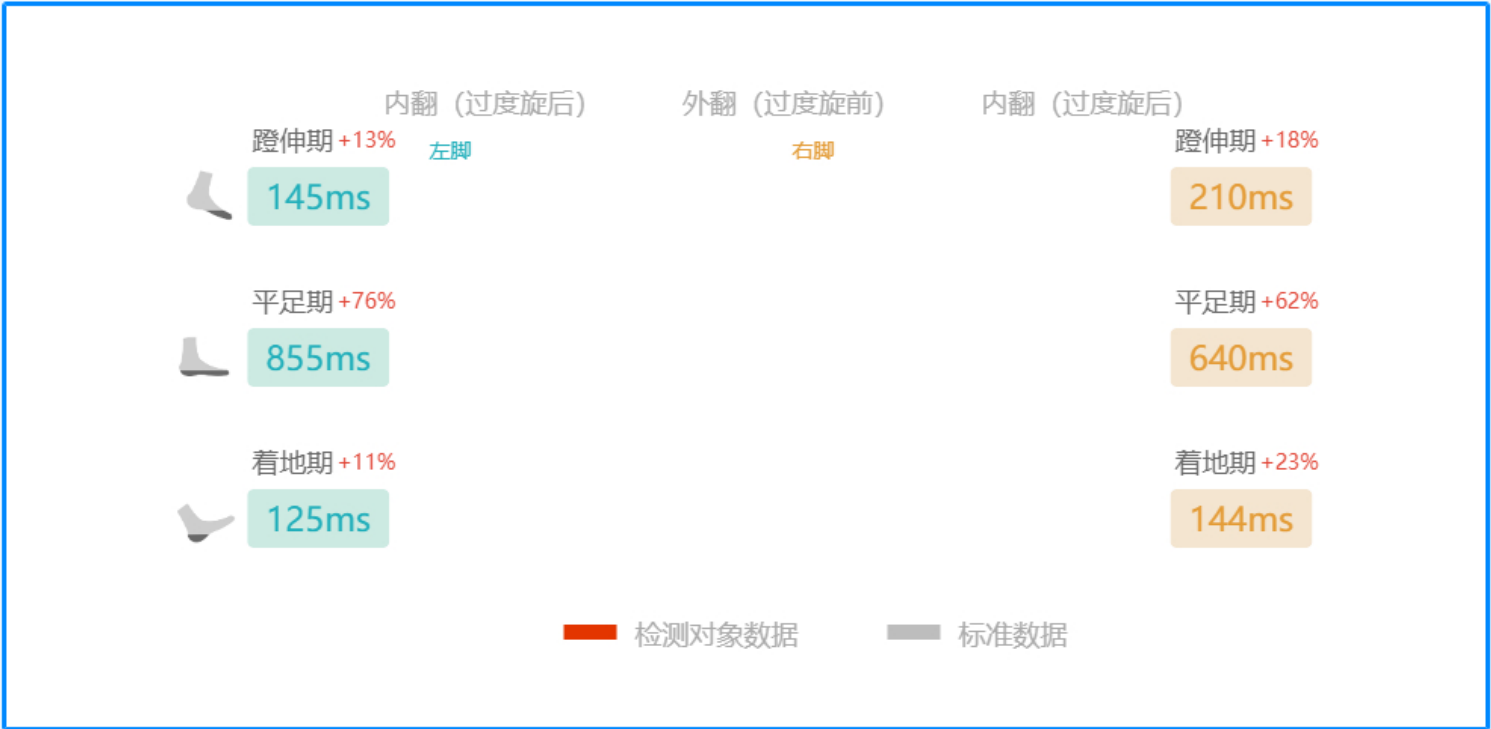

足弓类型

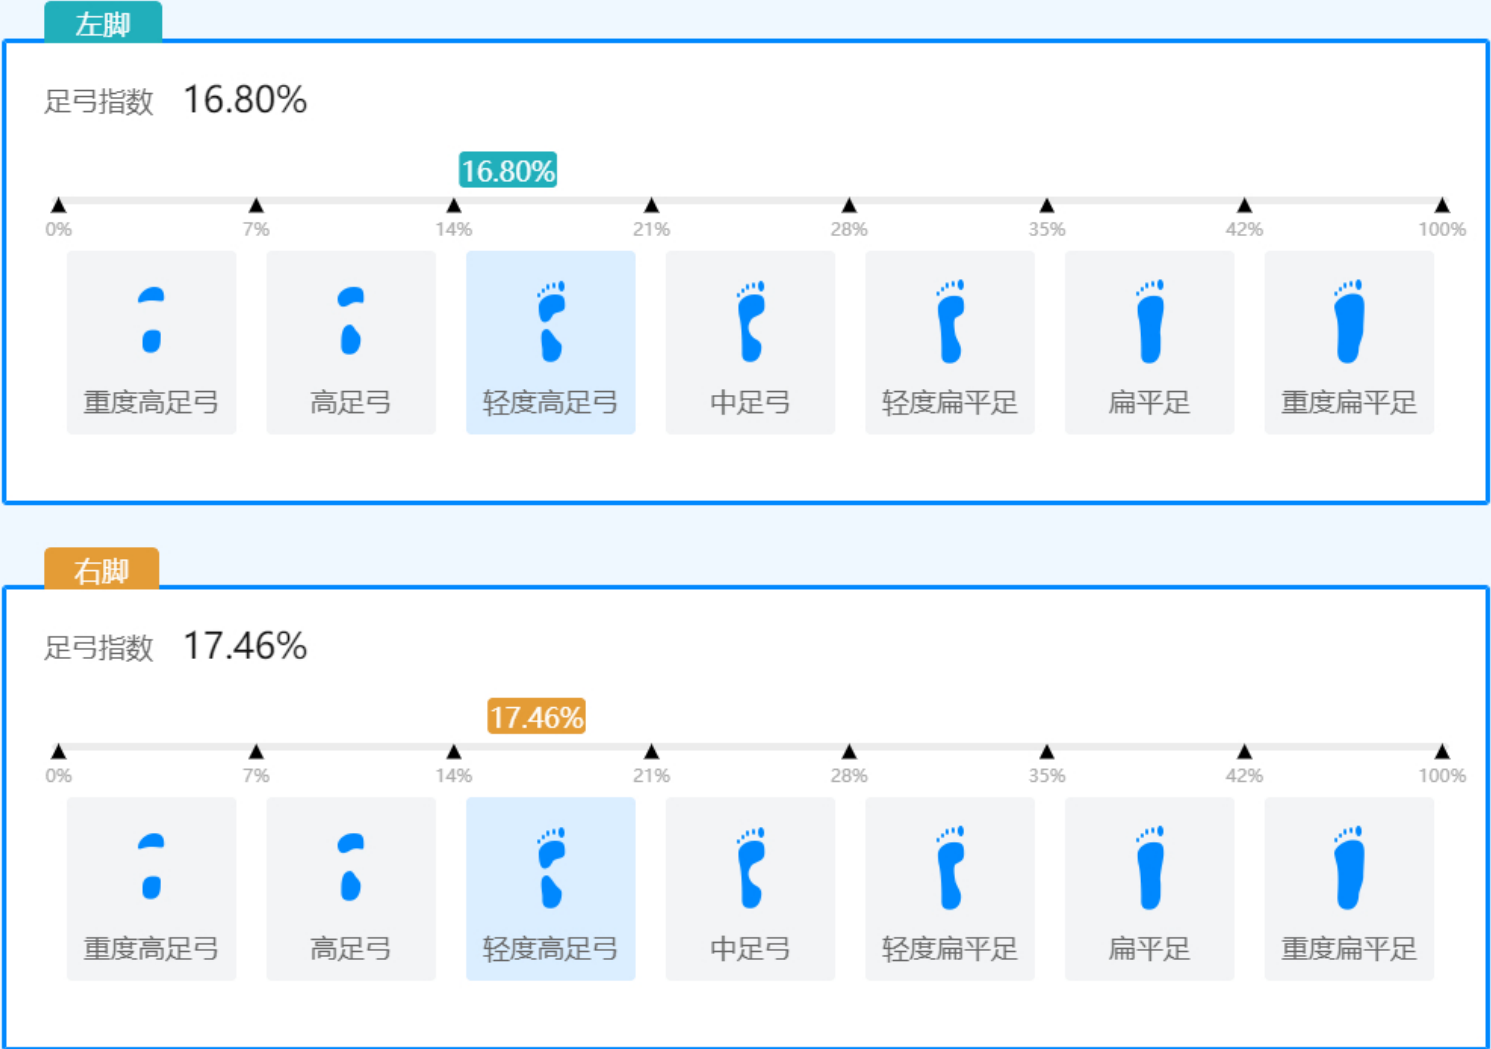



报告结论
