# Supplementary material for: Individualized Corrective Training Based on Precision Biomechanical Assessment for the Prevention of Sports Injuries in Adolescents
Source: Research Square preprint supplement (doi:10.21203/rs.3.rs-8426574/v1), 2026-02-02
Supplement: Supplementary file 81 [file 动态报告-杨帆-20250226131109.pdf › Plantar pressure and gait analysis/jump rope/动态报告-杨帆-20250226131109.pdf]

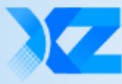

左右脚动态数据

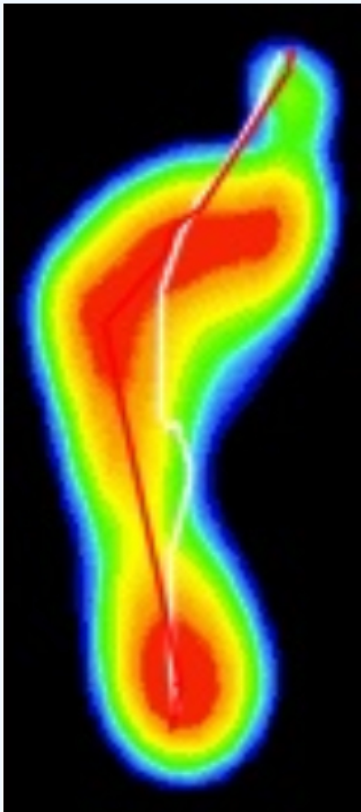

| 第1步      | Cop数据     | 第2步      |
|----------|-----------|----------|
| 228.70   | cop距离【mm】 | 225.66   |
| 8.09     | 步偏脚【°】    | 9.25     |
| 11855.30 | 面积【mm²】   | 11704.97 |
| 32973.96 | 压力【kgf】   | 32321.54 |
| 2.49     | 压强【gr/%】  | 2.54     |
| 49815.63 | 最大压力【kgf】 | 47844.23 |
| 0.24     | 速度【mm/ms】 | 0.21     |

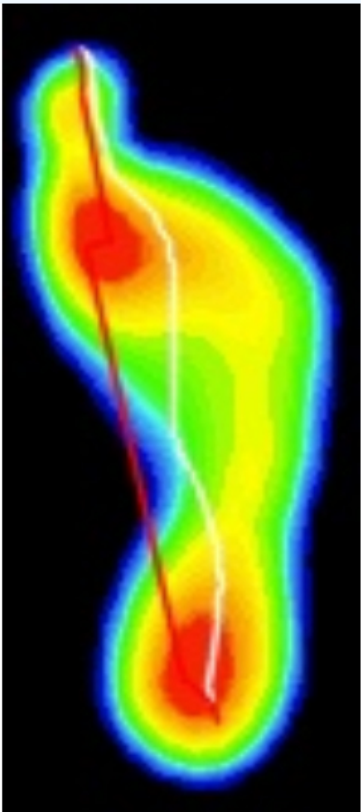

支撑相

左脚

|             |          |
|-------------|----------|
| ● 着地期 5%    |          |
| 时长【ms】      | 52.00    |
| 平均速度【mm/ms】 | 0.07     |
| 最大面积【mm²】   | 3195.45  |
| 最大压力【kgf】   | 6120.02  |
| ● 平足期 81%   |          |
| 时长【ms】      | 828.00   |
| 平均速度【mm/ms】 | 0.17     |
| 最大面积【mm²】   | 15765.30 |
| 最大压力【kgf】   | 48617.30 |
| ● 蹬伸期 14%   |          |
| 时长【ms】      | 144.00   |
| 平均速度【mm/ms】 | 0.33     |
| 最大面积【mm²】   | 7083.45  |
| 最大压力【kgf】   | 18042.88 |

右脚

|             |          |
|-------------|----------|
| ● 着地期 5%    |          |
| 时长【ms】      | 50.00    |
| 平均速度【mm/ms】 | 0.11     |
| 最大面积【mm²】   | 3686.06  |
| 最大压力【kgf】   | 6640.15  |
| ● 平足期 79%   |          |
| 时长【ms】      | 835.00   |
| 平均速度【mm/ms】 | 0.18     |
| 最大面积【mm²】   | 16349.63 |
| 最大压力【kgf】   | 47978.70 |
| ● 蹬伸期 17%   |          |
| 时长【ms】      | 175.00   |
| 平均速度【mm/ms】 | 0.32     |
| 最大面积【mm²】   | 7531.31  |
| 最大压力【kgf】   | 21677.08 |

内外翻

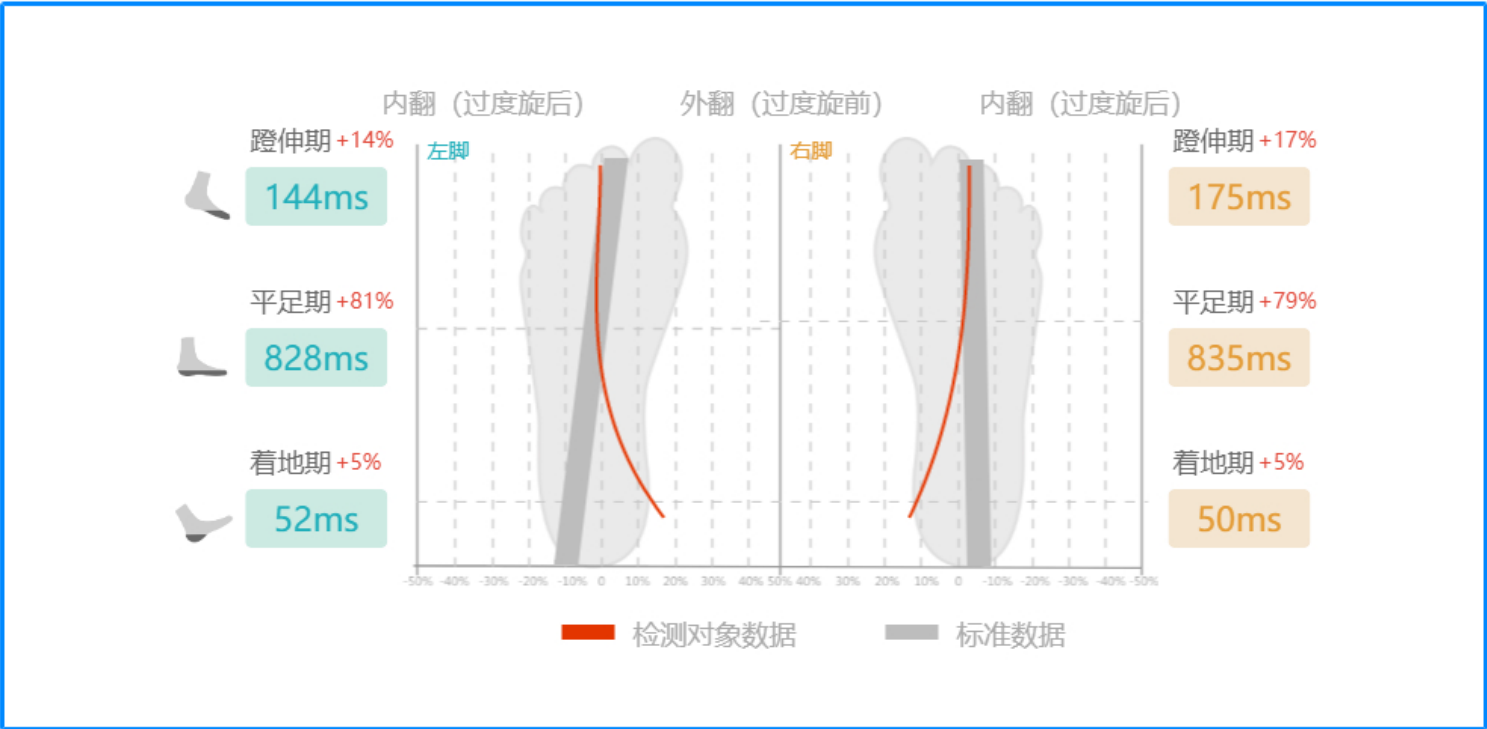

足弓类型

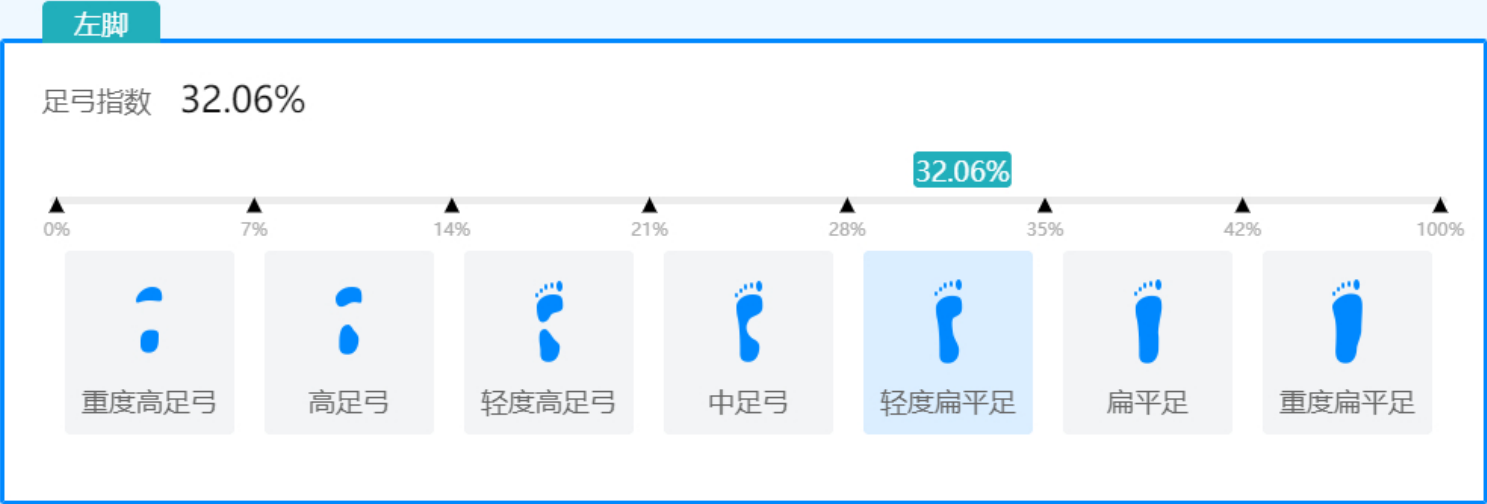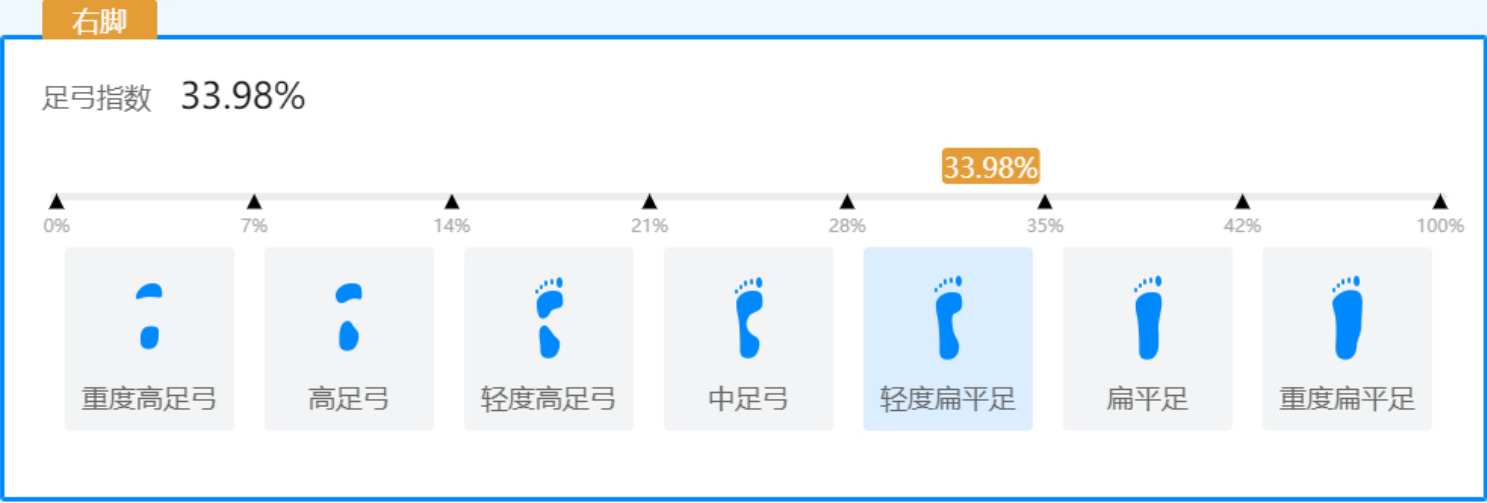

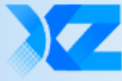

报告结论
