# Supplementary material for: Individualized Corrective Training Based on Precision Biomechanical Assessment for the Prevention of Sports Injuries in Adolescents
Source: Research Square preprint supplement (doi:10.21203/rs.3.rs-8426574/v1), 2026-02-02
Supplement: Supplementary file 82 [file 动态报告-杨雯杰-20250226135022.pdf › Plantar pressure and gait analysis/jump rope/动态报告-杨雯杰-20250226135022.pdf]

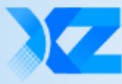

左右脚动态数据

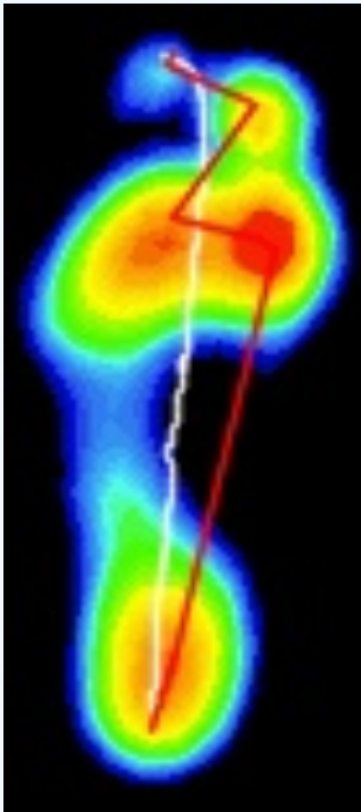

| 第2步      | Cop数据     | 第1步      |
|----------|-----------|----------|
| 216.42   | cop距离【mm】 | 195.40   |
| 17.25    | 步偏脚【°】    | 13.30    |
| 10240.25 | 面积【mm²】   | 9669.71  |
| 25292.64 | 压力【kgf】   | 24901.60 |
| 2.33     | 压强【gr/%】  | 2.44     |
| 36198.03 | 最大压力【kgf】 | 39446.51 |
| 0.18     | 速度【mm/ms】 | 0.17     |

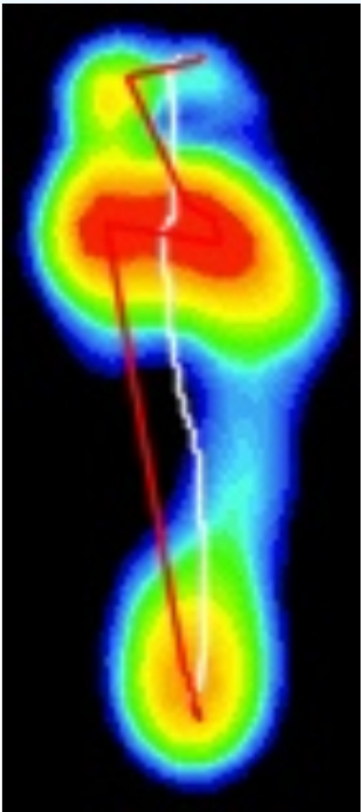

支撑相

左脚

|             |          |
|-------------|----------|
| ● 着地期 10%   |          |
| 时长【ms】      | 128.00   |
| 平均速度【mm/ms】 | 0.09     |
| 最大面积【mm²】   | 3793.05  |
| 最大压力【kgf】   | 11224.20 |
| ● 平足期 82%   |          |
| 时长【ms】      | 1036.00  |
| 平均速度【mm/ms】 | 0.15     |
| 最大面积【mm²】   | 14316.30 |
| 最大压力【kgf】   | 37265.18 |
| ● 蹬伸期 8%    |          |
| 时长【ms】      | 96.00    |
| 平均速度【mm/ms】 | 0.29     |
| 最大面积【mm²】   | 4500.90  |
| 最大压力【kgf】   | 7109.45  |

右脚

|             |          |
|-------------|----------|
| ● 着地期 9%    |          |
| 时长【ms】      | 110.00   |
| 平均速度【mm/ms】 | 0.07     |
| 最大面积【mm²】   | 3472.50  |
| 最大压力【kgf】   | 9356.15  |
| ● 平足期 84%   |          |
| 时长【ms】      | 1070.00  |
| 平均速度【mm/ms】 | 0.15     |
| 最大面积【mm²】   | 14532.75 |
| 最大压力【kgf】   | 39803.37 |
| ● 蹬伸期 7%    |          |
| 时长【ms】      | 90.00    |
| 平均速度【mm/ms】 | 0.30     |
| 最大面积【mm²】   | 4524.00  |
| 最大压力【kg/f】  | 7131.10  |

内外翻

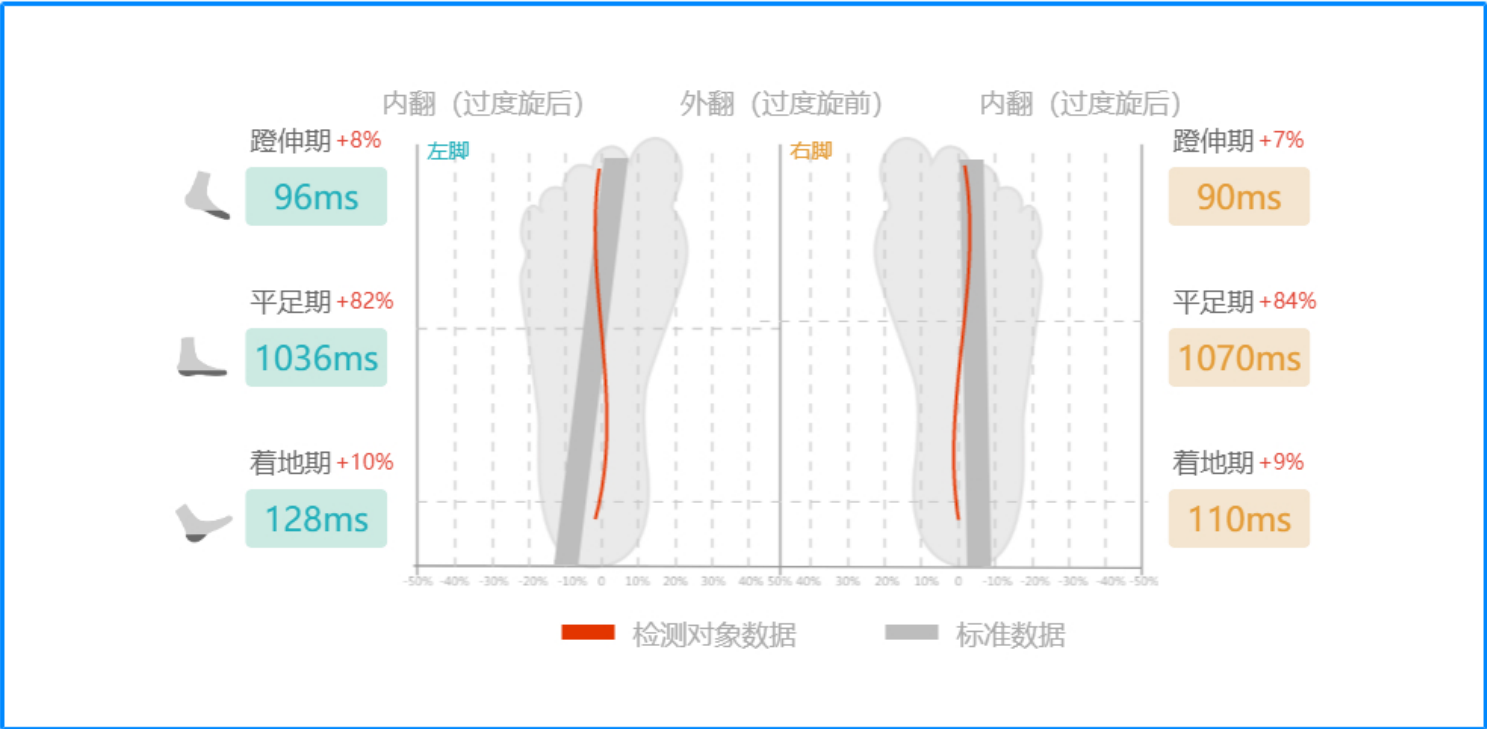

足弓类型

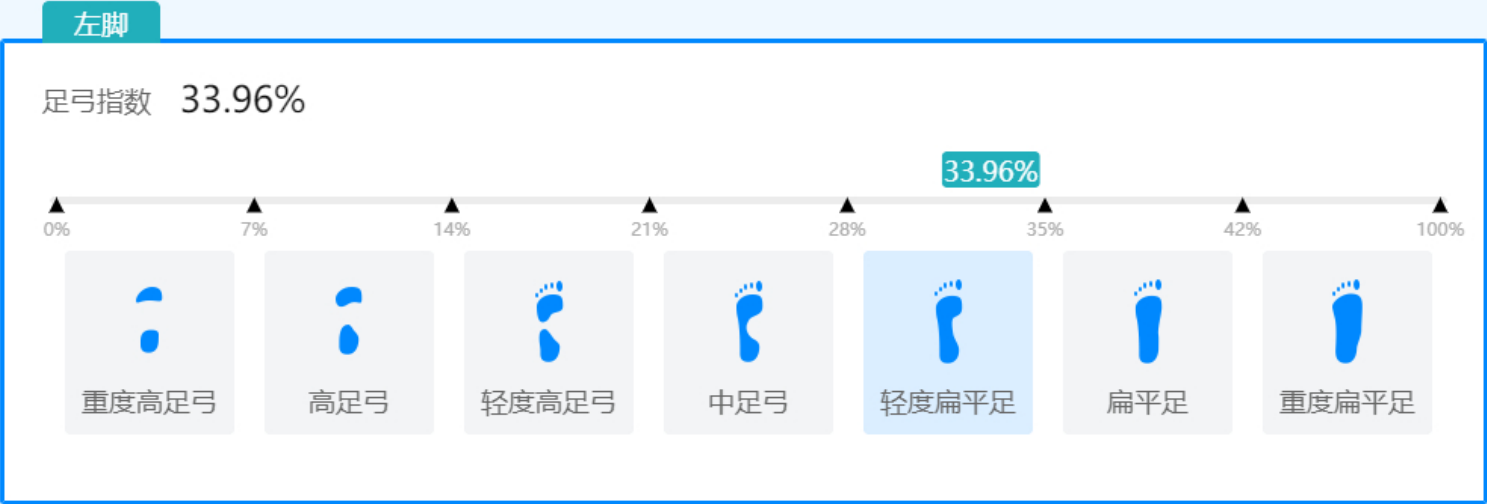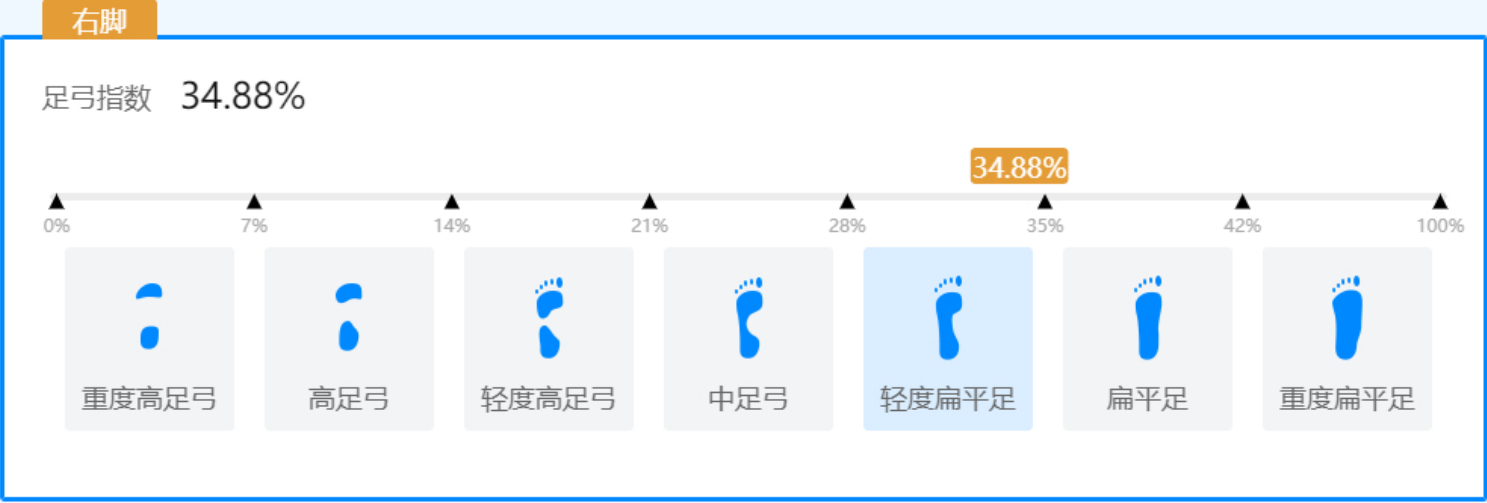

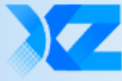

报告结论
