# Supplementary material for: Individualized Corrective Training Based on Precision Biomechanical Assessment for the Prevention of Sports Injuries in Adolescents
Source: Research Square preprint supplement (doi:10.21203/rs.3.rs-8426574/v1), 2026-02-02
Supplement: Supplementary file 83 [file 动态报告-毋梦鑫-20250303205417.pdf › Plantar pressure and gait analysis/jump rope/动态报告-毋梦鑫-20250303205417.pdf]

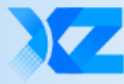

左右脚动态数据

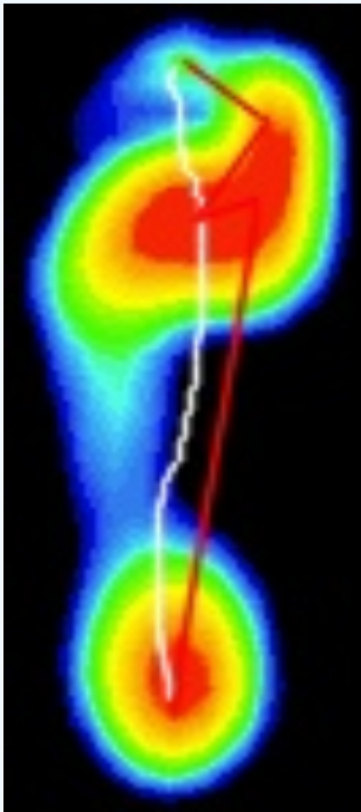

| 第1步      | Cop数据     | 第2步      |
|----------|-----------|----------|
| 191.41   | cop距离【mm】 | 205.39   |
| 5.24     | 步偏脚【°】    | 3.51     |
| 9005.80  | 面积【mm²】   | 9218.45  |
| 23092.03 | 压力【kgf】   | 23257.13 |
| 2.45     | 压强【gr/%】  | 2.38     |
| 35110.07 | 最大压力【kgf】 | 34539.00 |
| 0.19     | 速度【mm/ms】 | 0.19     |

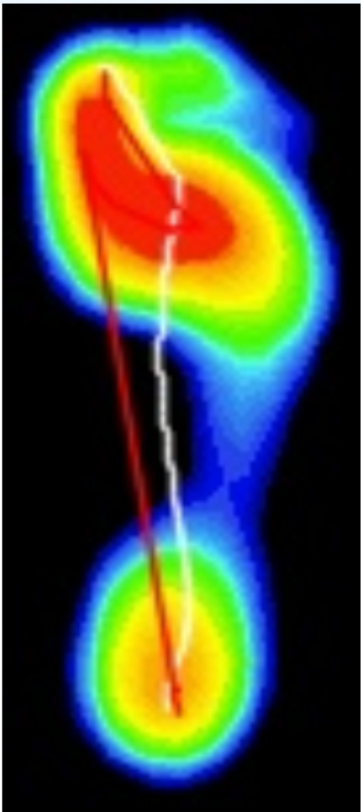

支撑相

左脚

|             |          |
|-------------|----------|
| ● 着地期 10%   |          |
| 时长【ms】      | 108.00   |
| 平均速度【mm/ms】 | 0.08     |
| 最大面积【mm²】   | 3856.95  |
| 最大压力【kgf】   | 10519.06 |
| ● 平足期 81%   |          |
| 时长【ms】      | 896.00   |
| 平均速度【mm/ms】 | 0.17     |
| 最大面积【mm²】   | 13762.35 |
| 最大压力【kgf】   | 36673.99 |
| ● 蹬伸期 9%    |          |
| 时长【ms】      | 104.00   |
| 平均速度【mm/ms】 | 0.27     |
| 最大面积【mm²】   | 5254.20  |
| 最大压力【kgf】   | 8607.74  |

右脚

|             |          |
|-------------|----------|
| ● 着地期 11%   |          |
| 时长【ms】      | 130.00   |
| 平均速度【mm/ms】 | 0.10     |
| 最大面积【mm²】   | 4036.50  |
| 最大压力【kgf】   | 10588.68 |
| ● 平足期 80%   |          |
| 时长【ms】      | 940.00   |
| 平均速度【mm/ms】 | 0.17     |
| 最大面积【mm²】   | 14443.88 |
| 最大压力【kgf】   | 37470.63 |
| ● 蹬伸期 9%    |          |
| 时长【ms】      | 105.00   |
| 平均速度【mm/ms】 | 0.23     |
| 最大面积【mm²】   | 5220.00  |
| 最大压力【kgf】   | 8604.53  |

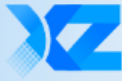

内外翻

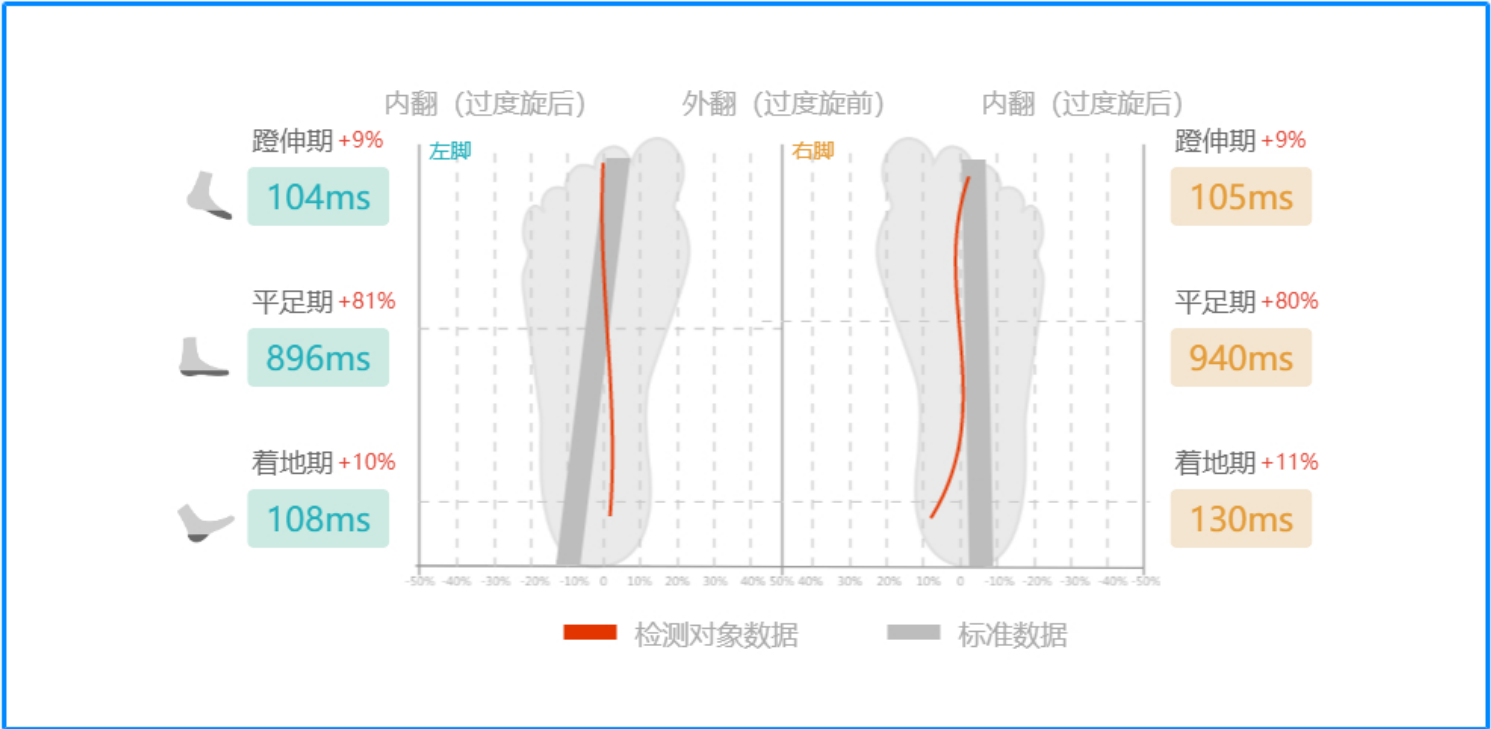

足弓类型

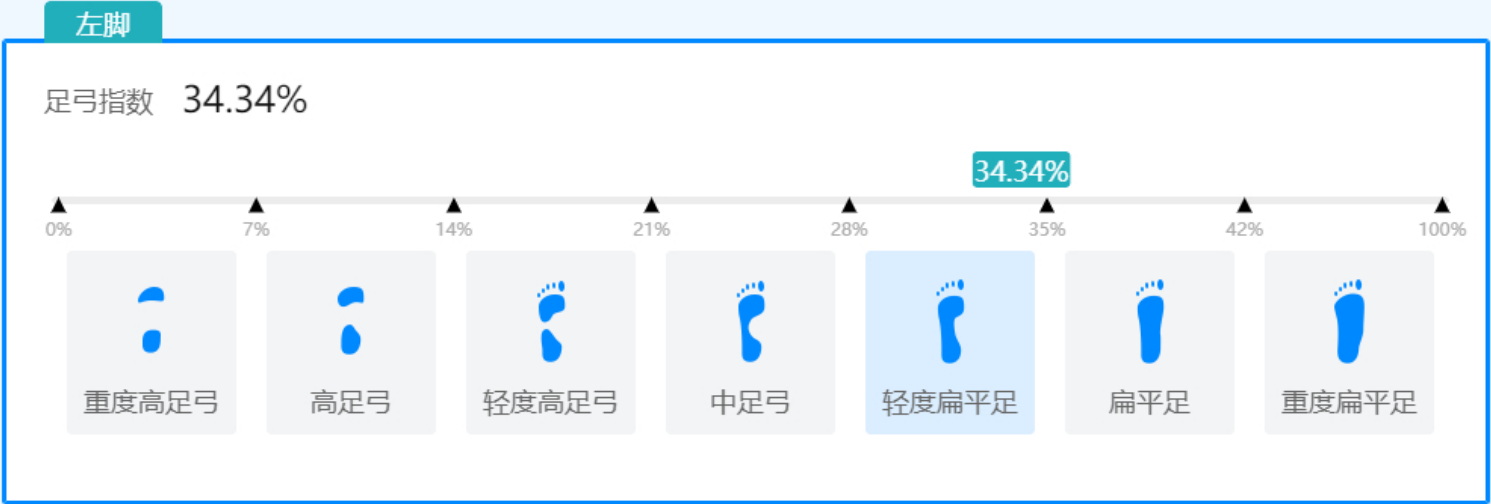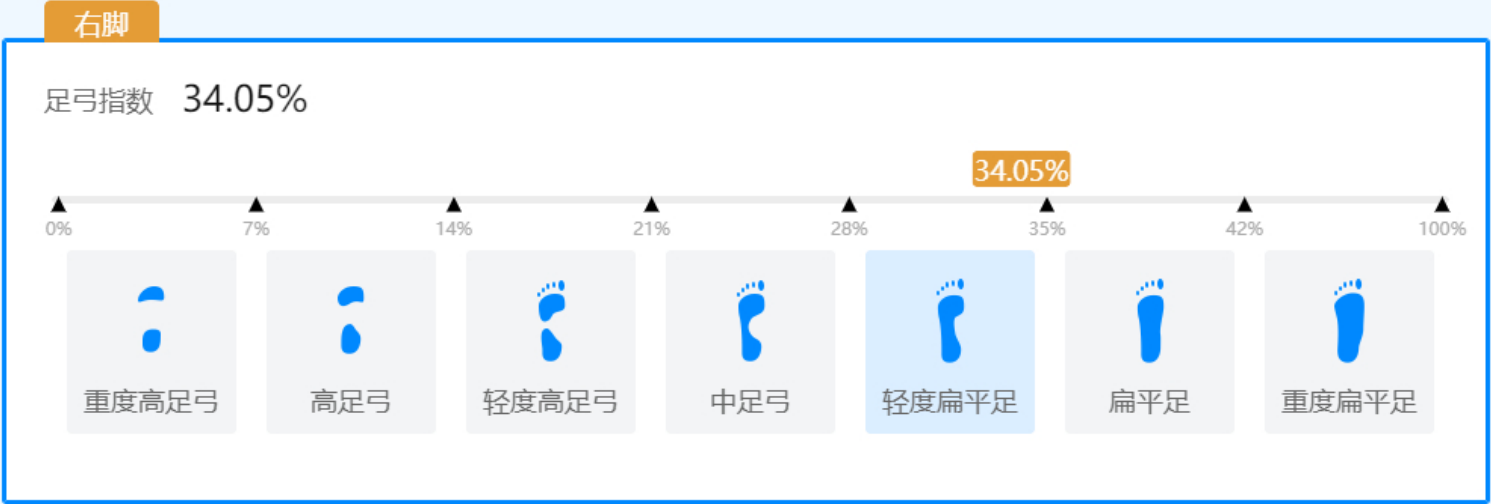



报告结论
