# Supplementary material for: Individualized Corrective Training Based on Precision Biomechanical Assessment for the Prevention of Sports Injuries in Adolescents
Source: Research Square preprint supplement (doi:10.21203/rs.3.rs-8426574/v1), 2026-02-02
Supplement: Supplementary file 84 [file 动态报告-王淑欣-20250226130116.pdf › Plantar pressure and gait analysis/jump rope/动态报告-王淑欣-20250226130116.pdf]

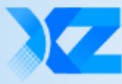

左右脚动态数据

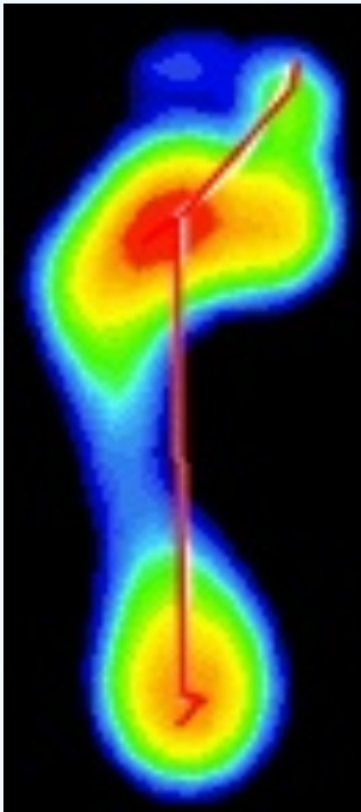

| 第2步      | Cop数据     | 第1步      |
|----------|-----------|----------|
| 192.10   | cop距离【mm】 | 185.10   |
| 10.51    | 步偏脚【°】    | 5.83     |
| 7923.35  | 面积【mm²】   | 9270.31  |
| 18266.44 | 压力【kgf】   | 21895.93 |
| 2.10     | 压强【gr/%】  | 2.14     |
| 31137.93 | 最大压力【kgf】 | 35180.96 |
| 0.22     | 速度【mm/ms】 | 0.22     |

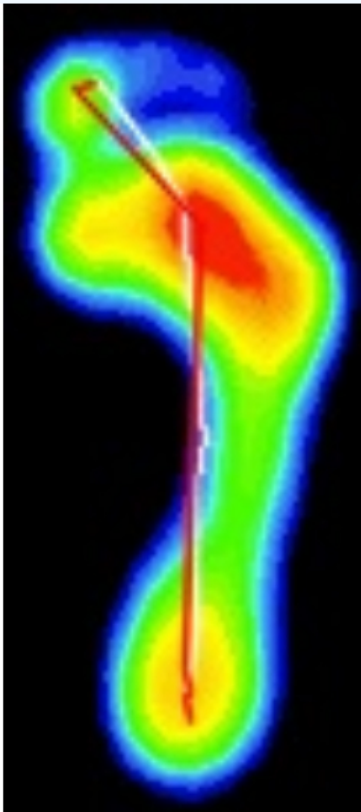

支撑相

左脚

|             |          |
|-------------|----------|
| ● 着地期 15%   |          |
| 时长【ms】      | 93.33    |
| 平均速度【mm/ms】 | 0.10     |
| 最大面积【mm²】   | 3238.50  |
| 最大压力【kgf】   | 6601.15  |
| ● 平足期 75%   |          |
| 时长【ms】      | 600.00   |
| 平均速度【mm/ms】 | 0.22     |
| 最大面积【mm²】   | 12040.88 |
| 最大压力【kgf】   | 30265.09 |
| ● 蹬伸期 12%   |          |
| 时长【ms】      | 104.00   |
| 平均速度【mm/ms】 | 0.31     |
| 最大面积【mm²】   | 4293.45  |
| 最大压力【kgf】   | 6677.34  |

右脚

|             |          |
|-------------|----------|
| ● 着地期 7%    |          |
| 时长【ms】      | 63.33    |
| 平均速度【mm/ms】 | 0.13     |
| 最大面积【mm²】   | 3100.50  |
| 最大压力【kgf】   | 5311.81  |
| ● 平足期 82%   |          |
| 时长【ms】      | 696.67   |
| 平均速度【mm/ms】 | 0.18     |
| 最大面积【mm²】   | 13131.38 |
| 最大压力【kgf】   | 33461.04 |
| ● 蹬伸期 10%   |          |
| 时长【ms】      | 86.67    |
| 平均速度【mm/ms】 | 0.38     |
| 最大面积【mm²】   | 5507.63  |
| 最大压力【kg/f】  | 9733.15  |

内外翻

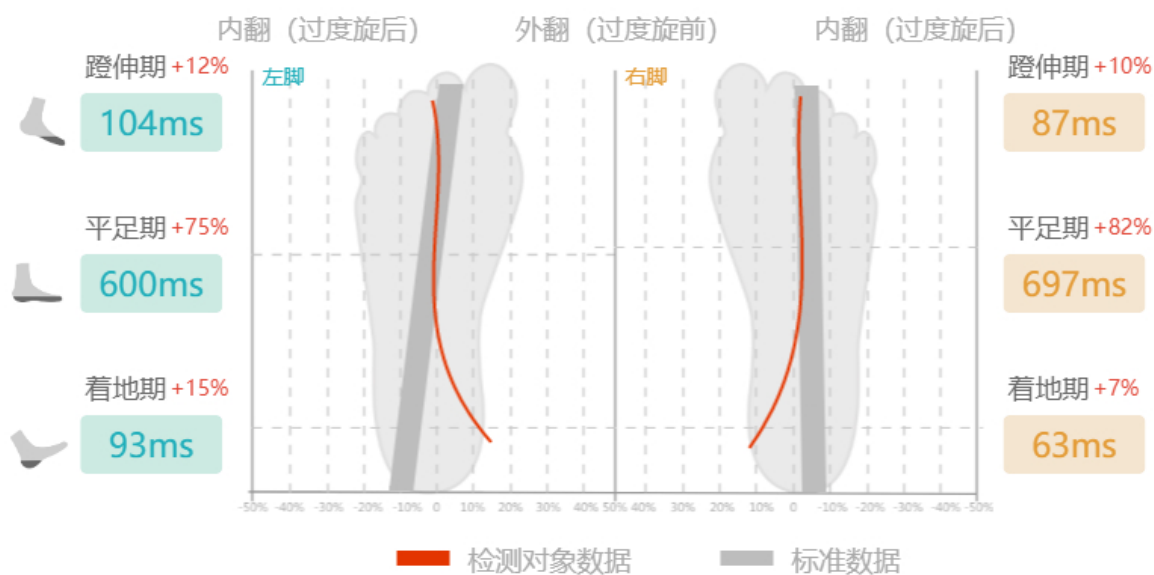

足弓类型

左脚

足弓指数 23.33%

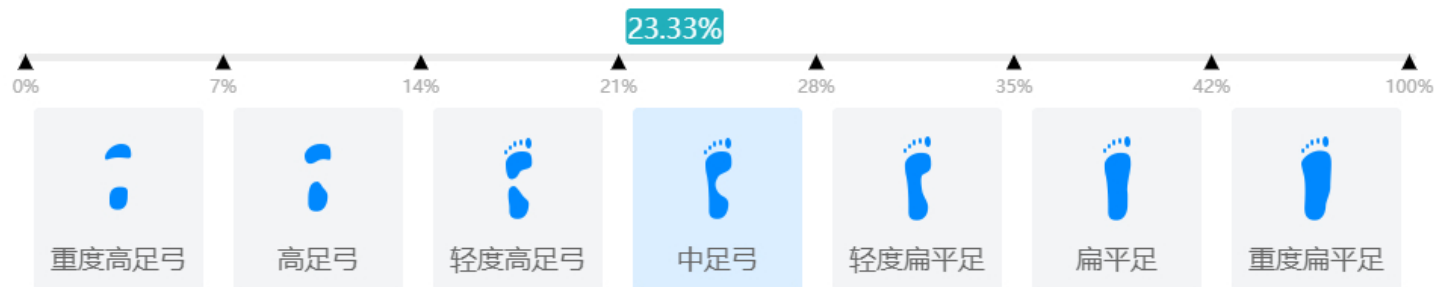

右脚

足弓指数 27.70%

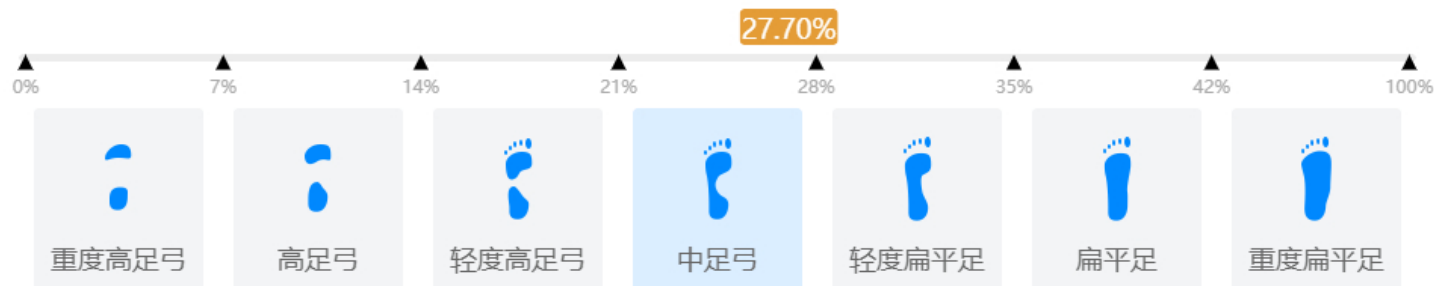

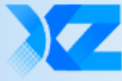

报告结论
