# Supplementary material for: Individualized Corrective Training Based on Precision Biomechanical Assessment for the Prevention of Sports Injuries in Adolescents
Source: Research Square preprint supplement (doi:10.21203/rs.3.rs-8426574/v1), 2026-02-02
Supplement: Supplementary file 85 [file 动态报告-王耀彬-20250226131558.pdf › Plantar pressure and gait analysis/jump rope/动态报告-王耀彬-20250226131558.pdf]

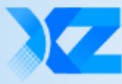

左右脚动态数据

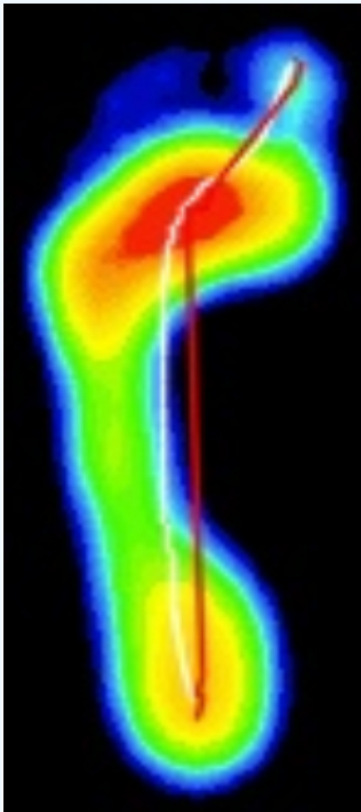

| 第3步      | Cop数据     | 第1步      |
|----------|-----------|----------|
| 215.70   | cop距离【mm】 | 105.89   |
| 3.97     | 步偏脚【°】    | -4.68    |
| 10062.70 | 面积【mm²】   | 9151.06  |
| 26139.00 | 压力【kgf】   | 24590.34 |
| 2.43     | 压强【gr/%】  | 2.51     |
| 41035.57 | 最大压力【kgf】 | 37267.78 |
| 0.26     | 速度【mm/ms】 | 0.24     |

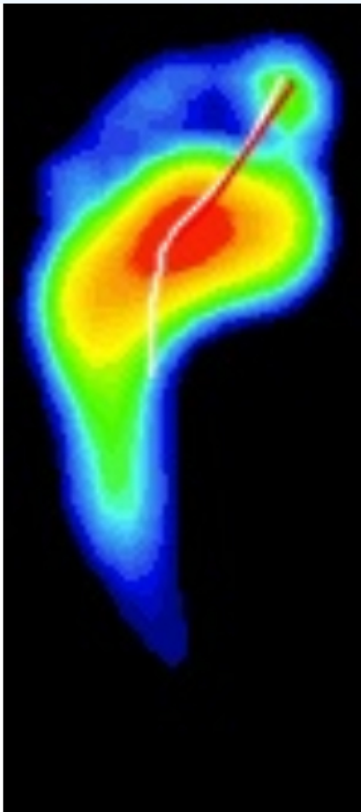

支撑相

左脚

|             |          |
|-------------|----------|
| ● 着地期 5%    |          |
| 时长【ms】      | 40.00    |
| 平均速度【mm/ms】 | 0.08     |
| 最大面积【mm²】   | 2220.75  |
| 最大压力【kgf】   | 2790.11  |
| ● 平足期 80%   |          |
| 时长【ms】      | 704.00   |
| 平均速度【mm/ms】 | 0.20     |
| 最大面积【mm²】   | 14773.95 |
| 最大压力【kgf】   | 41371.85 |
| ● 蹬伸期 16%   |          |
| 时长【ms】      | 144.00   |
| 平均速度【mm/ms】 | 0.30     |
| 最大面积【mm²】   | 7767.00  |
| 最大压力【kgf】   | 20813.75 |

右脚

|             |          |
|-------------|----------|
| ● 着地期 5%    |          |
| 时长【ms】      | 25.71    |
| 平均速度【mm/ms】 | 0.01     |
| 最大面积【mm²】   | 885.21   |
| 最大压力【kgf】   | 713.25   |
| ● 平足期 85%   |          |
| 时长【ms】      | 760.00   |
| 平均速度【mm/ms】 | 0.23     |
| 最大面积【mm²】   | 15150.66 |
| 最大压力【kgf】   | 40856.95 |
| ● 蹬伸期 12%   |          |
| 时长【ms】      | 100.00   |
| 平均速度【mm/ms】 | 0.28     |
| 最大面积【mm²】   | 4912.39  |
| 最大压力【kgf】   | 8875.19  |

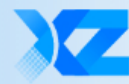

内外翻

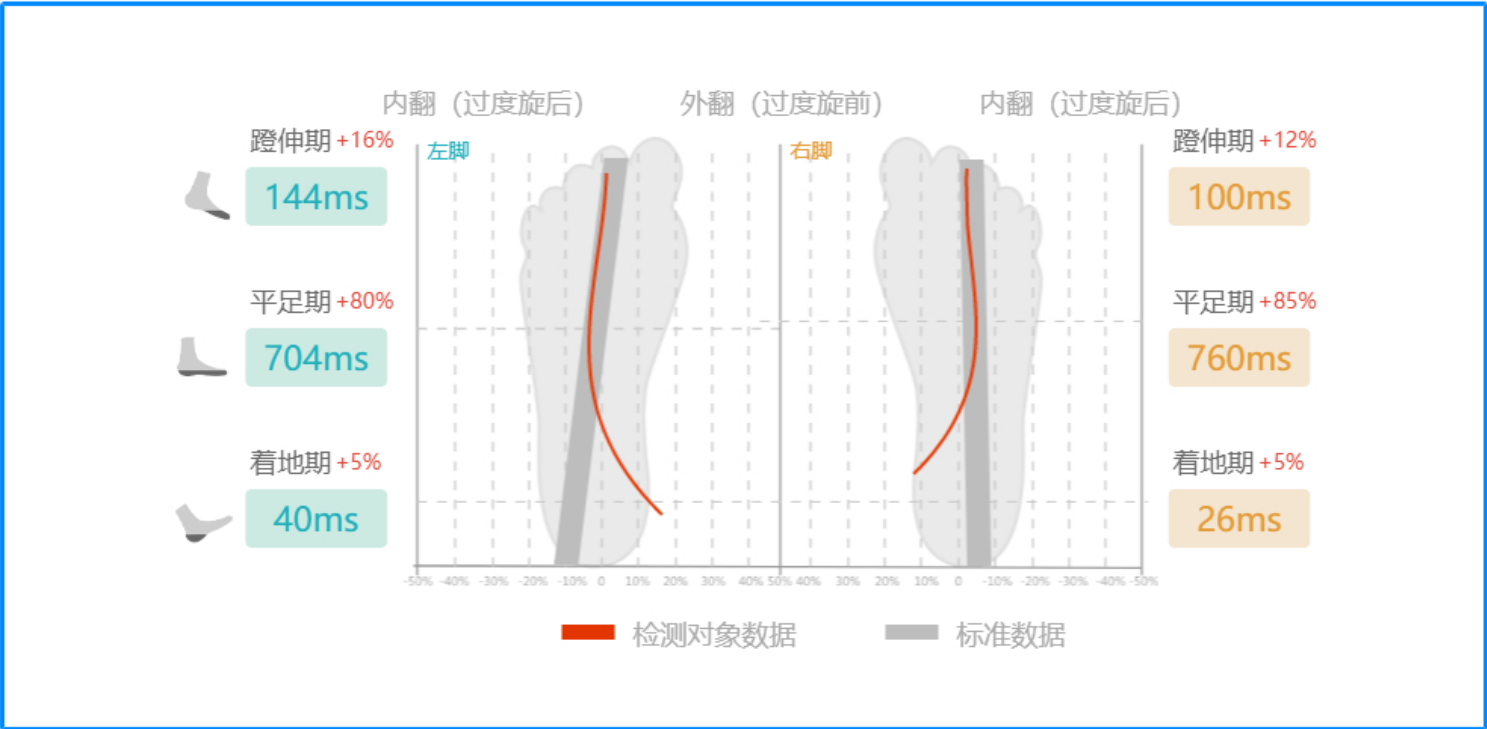

足弓类型

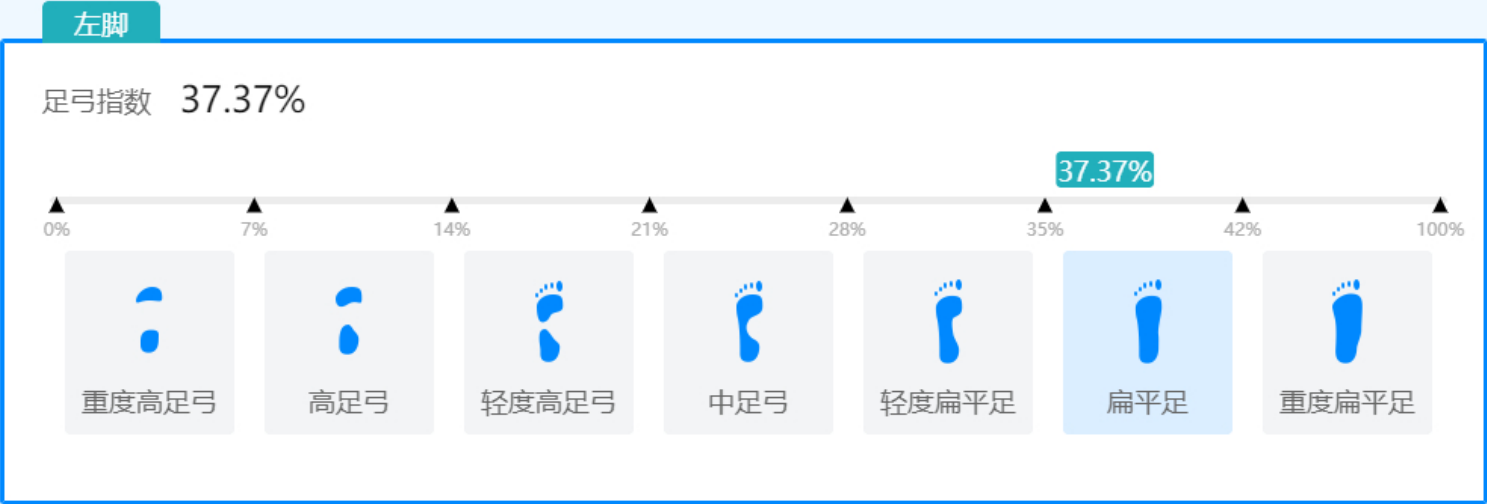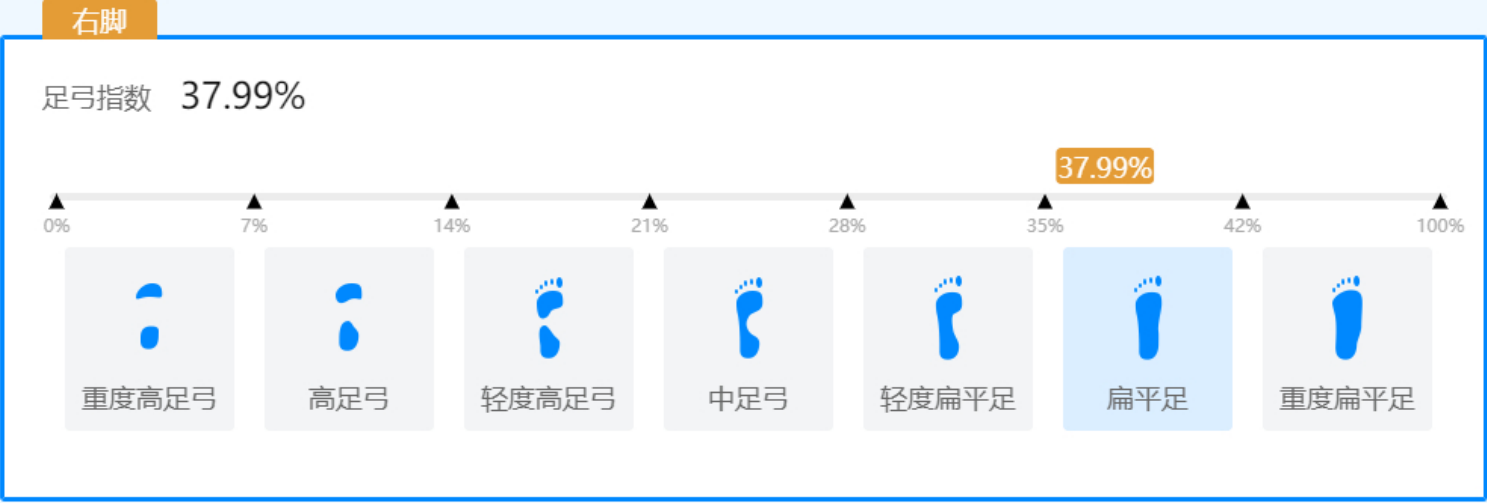

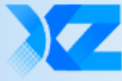

报告结论
