# Supplementary material for: Individualized Corrective Training Based on Precision Biomechanical Assessment for the Prevention of Sports Injuries in Adolescents
Source: Research Square preprint supplement (doi:10.21203/rs.3.rs-8426574/v1), 2026-02-02
Supplement: Supplementary file 86 [file 动态报告-薛培爽-20250226130626.pdf › Plantar pressure and gait analysis/jump rope/动态报告-薛培爽-20250226130626.pdf]

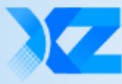

左右脚动态数据

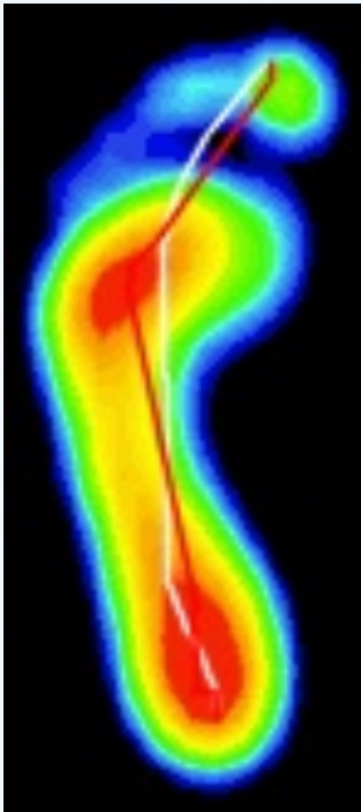

| 第2步      | Cop数据     | 第1步      |
|----------|-----------|----------|
| 212.34   | cop距离【mm】 | 200.81   |
| 2.24     | 步偏脚【°】    | 5.24     |
| 9437.58  | 面积【mm²】   | 10660.55 |
| 26883.77 | 压力【kgf】   | 29250.28 |
| 2.63     | 压强【gr/%】  | 2.53     |
| 44122.34 | 最大压力【kgf】 | 42847.12 |
| 0.23     | 速度【mm/ms】 | 0.24     |

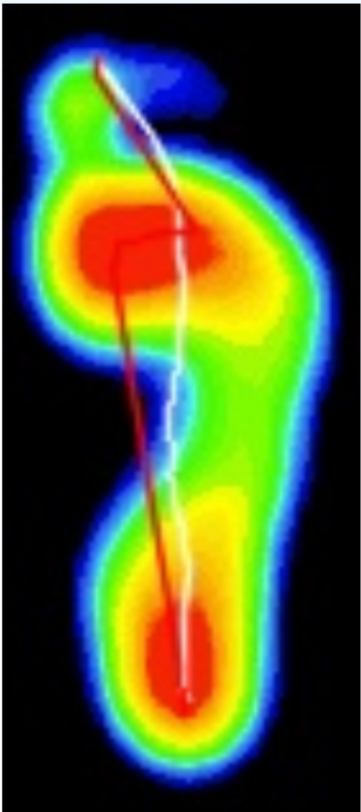

支撑相

左脚

|             |          |
|-------------|----------|
| ● 着地期 5%    |          |
| 时长【ms】      | 48.00    |
| 平均速度【mm/ms】 | 0.11     |
| 最大面积【mm²】   | 3090.60  |
| 最大压力【kgf】   | 5952.11  |
| ● 平足期 77%   |          |
| 时长【ms】      | 692.00   |
| 平均速度【mm/ms】 | 0.21     |
| 最大面积【mm²】   | 15418.35 |
| 最大压力【kgf】   | 44340.71 |
| ● 蹬伸期 17%   |          |
| 时长【ms】      | 156.00   |
| 平均速度【mm/ms】 | 0.32     |
| 最大面积【mm²】   | 7780.05  |
| 最大压力【kgf】   | 21046.93 |

右脚

|             |          |
|-------------|----------|
| ● 着地期 5%    |          |
| 时长【ms】      | 43.33    |
| 平均速度【mm/ms】 | 0.10     |
| 最大面积【mm²】   | 3404.25  |
| 最大压力【kgf】   | 6696.76  |
| ● 平足期 84%   |          |
| 时长【ms】      | 716.67   |
| 平均速度【mm/ms】 | 0.21     |
| 最大面积【mm²】   | 14318.63 |
| 最大压力【kgf】   | 42081.35 |
| ● 蹬伸期 11%   |          |
| 时长【ms】      | 90.00    |
| 平均速度【mm/ms】 | 0.39     |
| 最大面积【mm²】   | 5490.00  |
| 最大压力【kg/f】  | 11533.39 |

内外翻

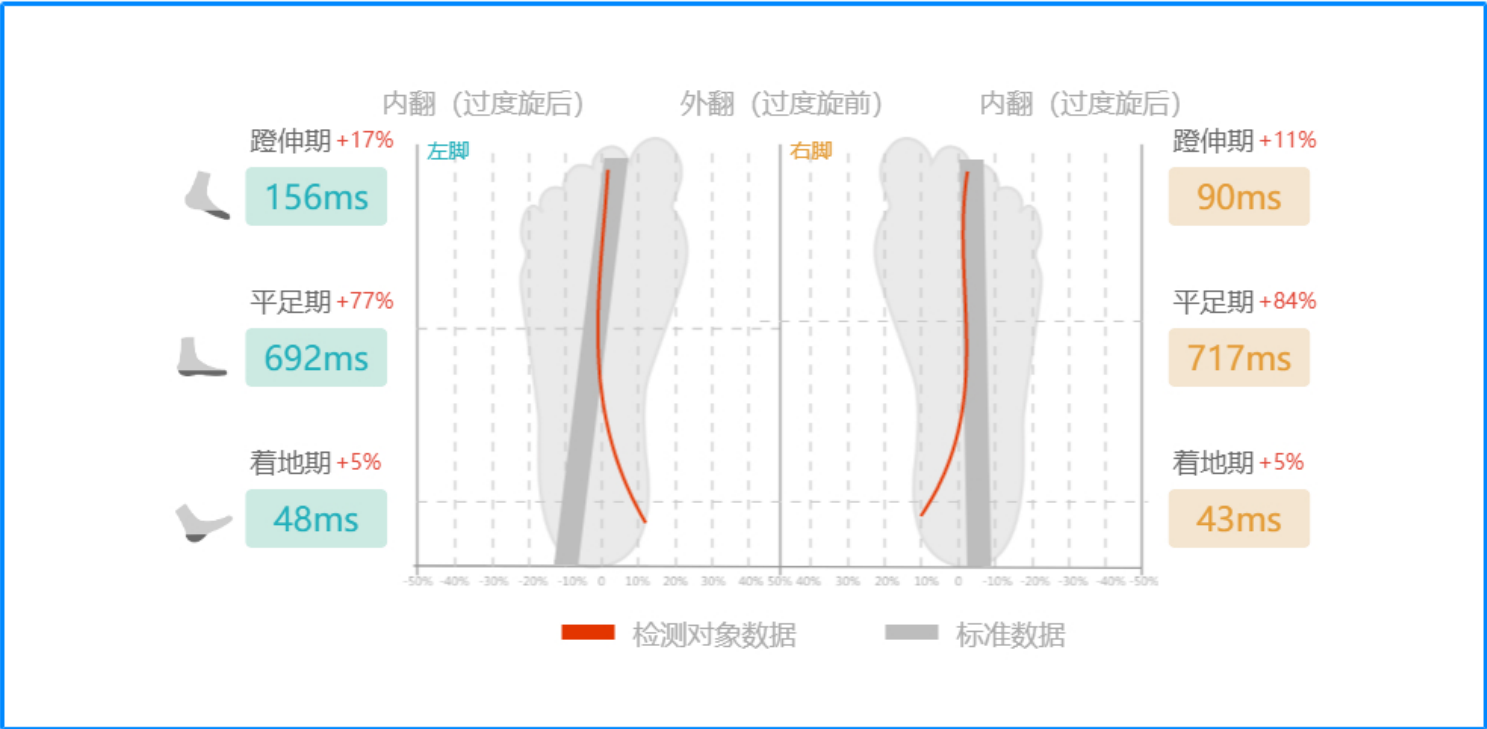

足弓类型

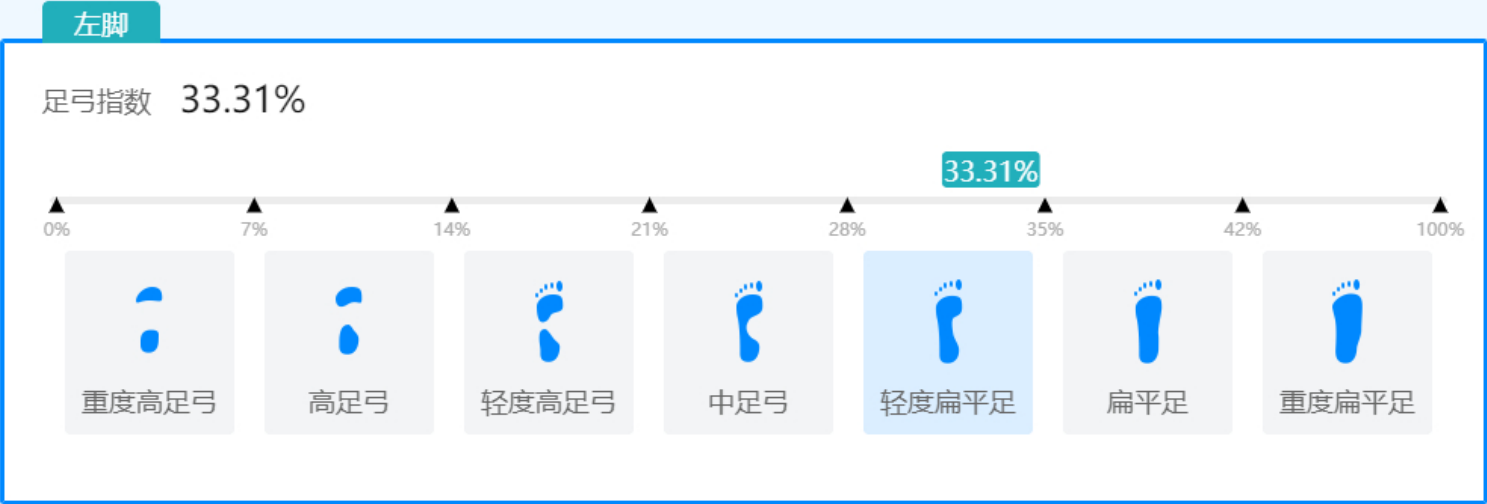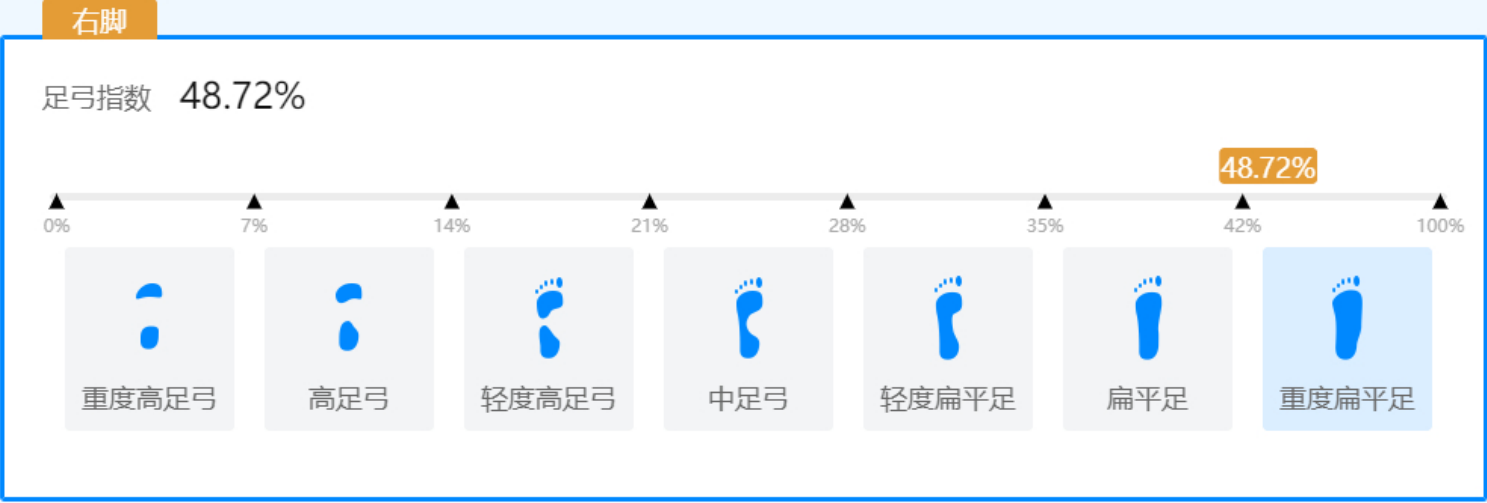

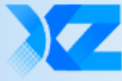

报告结论
