# Supplementary material for: Individualized Corrective Training Based on Precision Biomechanical Assessment for the Prevention of Sports Injuries in Adolescents
Source: Research Square preprint supplement (doi:10.21203/rs.3.rs-8426574/v1), 2026-02-02

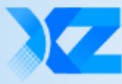

左右脚动态数据

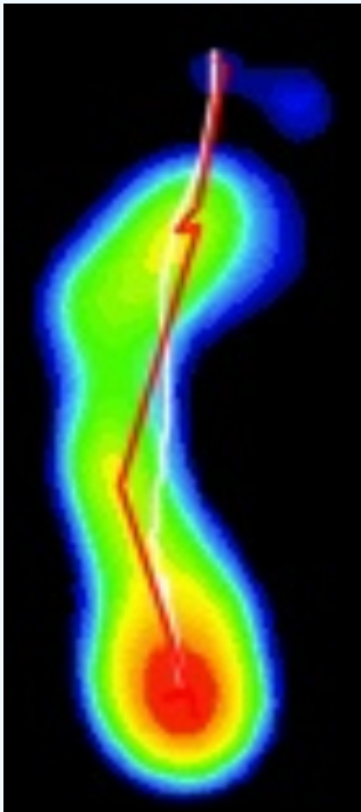

| 第2步      | Cop数据     | 第1步      |
|----------|-----------|----------|
| 221.07   | cop距离【mm】 | 208.36   |
| -11.96   | 步偏脚【°】    | 11.68    |
| 8650.99  | 面积【mm²】   | 9931.01  |
| 20147.06 | 压力【kgf】   | 22936.58 |
| 2.12     | 压强【gr/%】  | 2.12     |
| 34874.27 | 最大压力【kgf】 | 33699.16 |
| 0.25     | 速度【mm/ms】 | 0.25     |

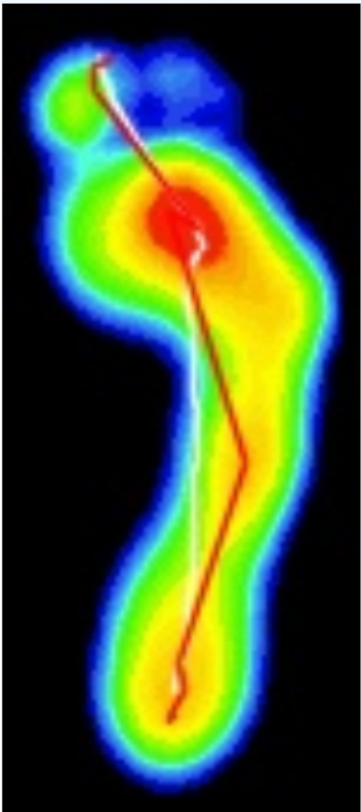

支撑相

左脚

|             |          |
|-------------|----------|
| ● 着地期 4%    |          |
| 时长【ms】      | 37.78    |
| 平均速度【mm/ms】 | 0.07     |
| 最大面积【mm²】   | 2566.75  |
| 最大压力【kgf】   | 3645.08  |
| ● 平足期 86%   |          |
| 时长【ms】      | 788.00   |
| 平均速度【mm/ms】 | 0.18     |
| 最大面积【mm²】   | 14532.53 |
| 最大压力【kgf】   | 35879.91 |
| ● 蹬伸期 10%   |          |
| 时长【ms】      | 94.00    |
| 平均速度【mm/ms】 | 0.31     |
| 最大面积【mm²】   | 4995.00  |
| 最大压力【kgf】   | 8316.15  |

右脚

|             |          |
|-------------|----------|
| ● 着地期 5%    |          |
| 时长【ms】      | 40.00    |
| 平均速度【mm/ms】 | 0.09     |
| 最大面积【mm²】   | 3552.75  |
| 最大压力【kgf】   | 5626.55  |
| ● 平足期 90%   |          |
| 时长【ms】      | 833.33   |
| 平均速度【mm/ms】 | 0.20     |
| 最大面积【mm²】   | 15363.75 |
| 最大压力【kgf】   | 37471.46 |
| ● 蹬伸期 7%    |          |
| 时长【ms】      | 66.67    |
| 平均速度【mm/ms】 | 0.27     |
| 最大面积【mm²】   | 2448.00  |
| 最大压力【kgf】   | 2201.85  |

内外翻

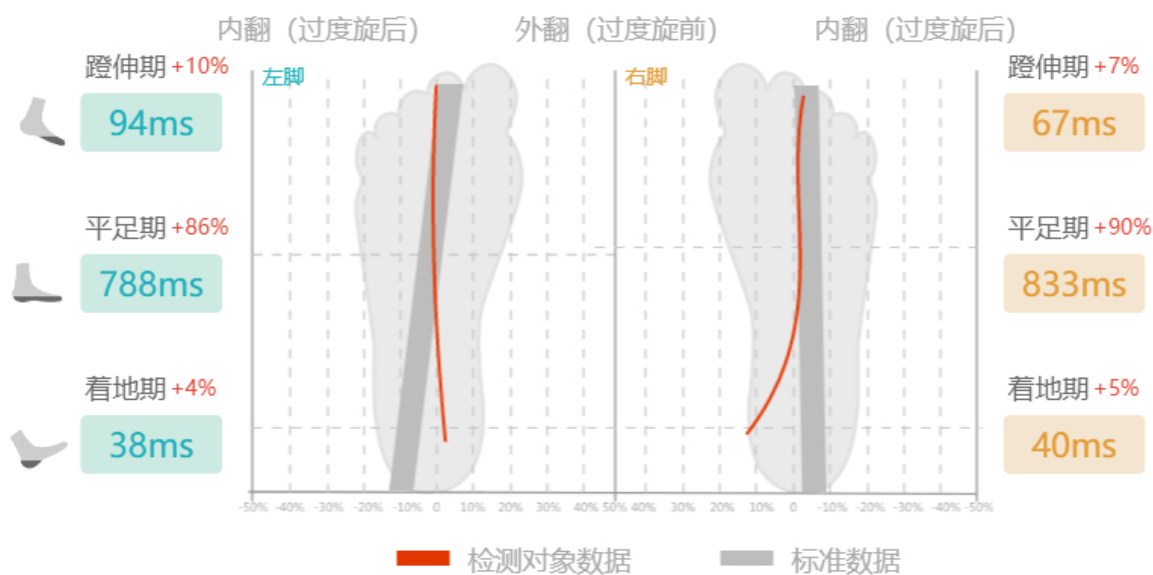

足弓类型

左脚

足弓指数 37.04%

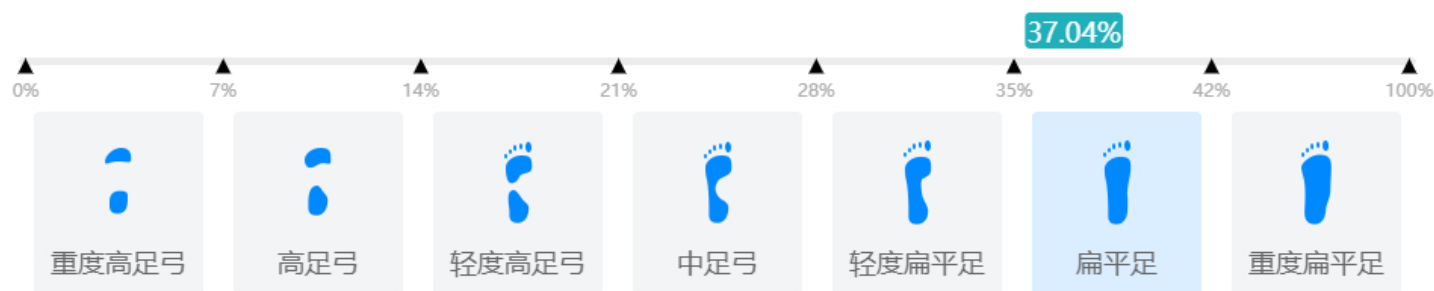

右脚

足弓指数 42.37%

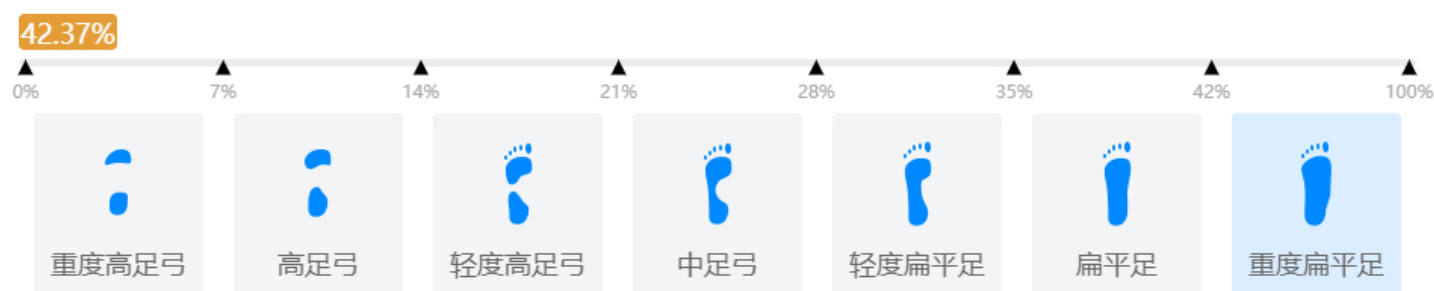

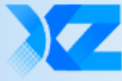

报告结论

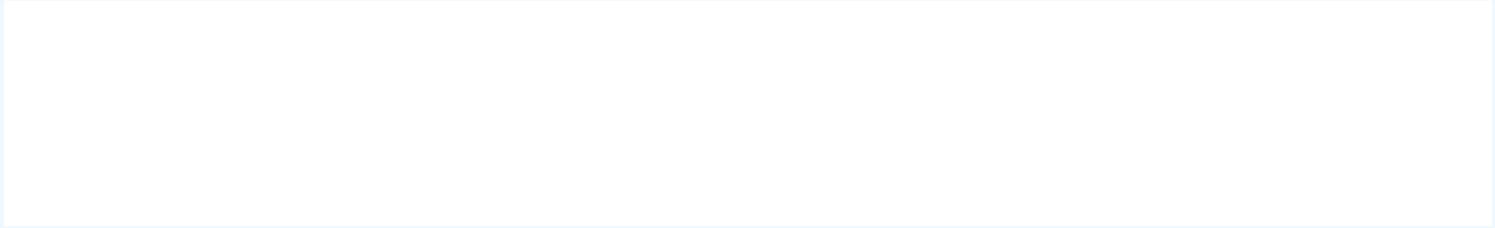

Supplement: Supplementary file 87 [file 动态报告-闫静雯-20250226125519.pdf › Plantar pressure and gait analysis/jump rope/动态报告-闫静雯-20250226125519.pdf]
