# Supplementary material for: Individualized Corrective Training Based on Precision Biomechanical Assessment for the Prevention of Sports Injuries in Adolescents
Source: Research Square preprint supplement (doi:10.21203/rs.3.rs-8426574/v1), 2026-02-02

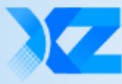

左右脚动态数据

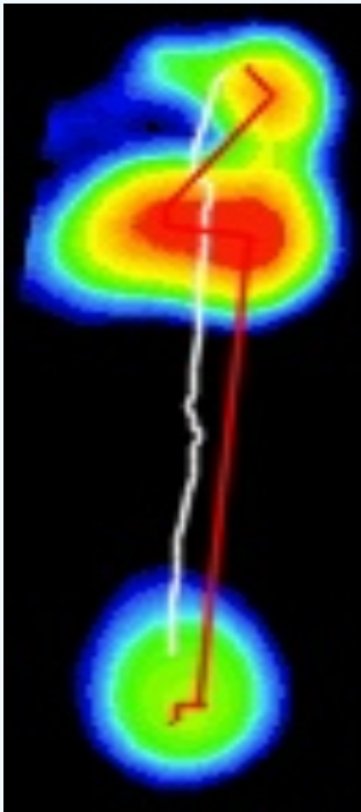

| 第1步      | Cop数据     | 第2步      |
|----------|-----------|----------|
| 211.95   | cop距离【mm】 | 286.47   |
| 7.72     | 步偏脚【°】    | 14.27    |
| 8629.75  | 面积【mm²】   | 10984.50 |
| 21487.80 | 压力【kgf】   | 28150.03 |
| 2.31     | 压强【gr/%】  | 2.28     |
| 39536.98 | 最大压力【kgf】 | 49307.17 |
| 0.24     | 速度【mm/ms】 | 0.28     |

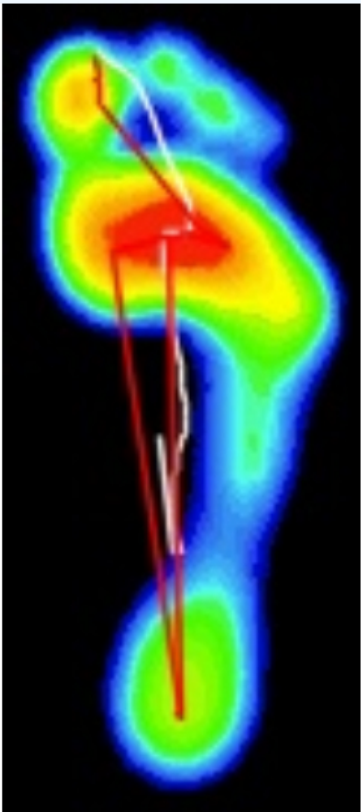

支撑相

左脚

|             |          |
|-------------|----------|
| ● 着地期 7%    |          |
| 时长【ms】      | 53.33    |
| 平均速度【mm/ms】 | 0.12     |
| 最大面积【mm²】   | 3756.38  |
| 最大压力【kgf】   | 6352.96  |
| ● 平足期 87%   |          |
| 时长【ms】      | 753.33   |
| 平均速度【mm/ms】 | 0.19     |
| 最大面积【mm²】   | 15418.13 |
| 最大压力【kgf】   | 44119.93 |
| ● 蹬伸期 8%    |          |
| 时长【ms】      | 72.00    |
| 平均速度【mm/ms】 | 0.32     |
| 最大面积【mm²】   | 4788.00  |
| 最大压力【kgf】   | 7877.69  |

右脚

|             |          |
|-------------|----------|
| ● 着地期 8%    |          |
| 时长【ms】      | 84.00    |
| 平均速度【mm/ms】 | 0.84     |
| 最大面积【mm²】   | 4646.70  |
| 最大压力【kgf】   | 5356.29  |
| ● 平足期 77%   |          |
| 时长【ms】      | 820.00   |
| 平均速度【mm/ms】 | 0.16     |
| 最大面积【mm²】   | 16704.90 |
| 最大压力【kgf】   | 45584.15 |
| ● 蹬伸期 16%   |          |
| 时长【ms】      | 168.00   |
| 平均速度【mm/ms】 | 0.33     |
| 最大面积【mm²】   | 8797.50  |
| 最大压力【kgf】   | 22254.83 |

内外翻

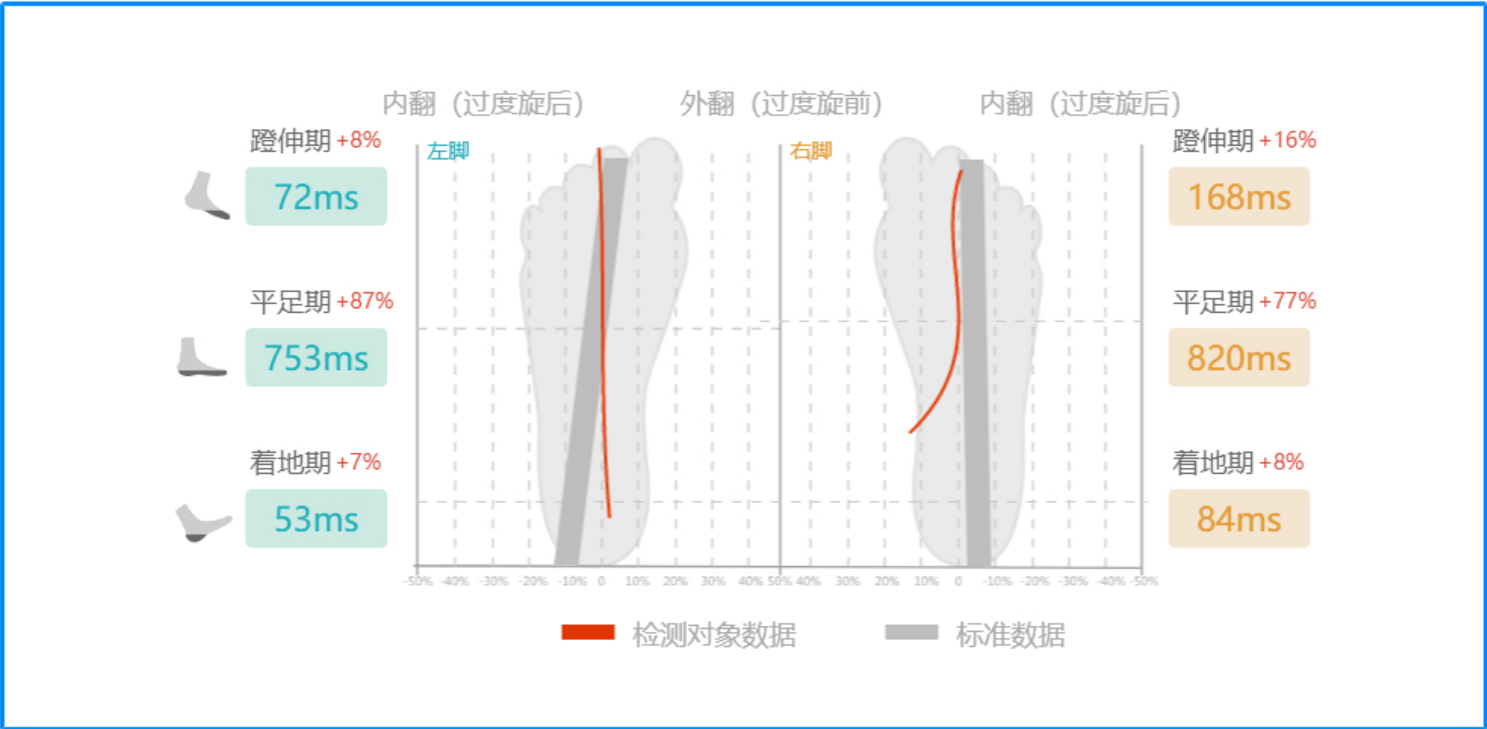

足弓类型

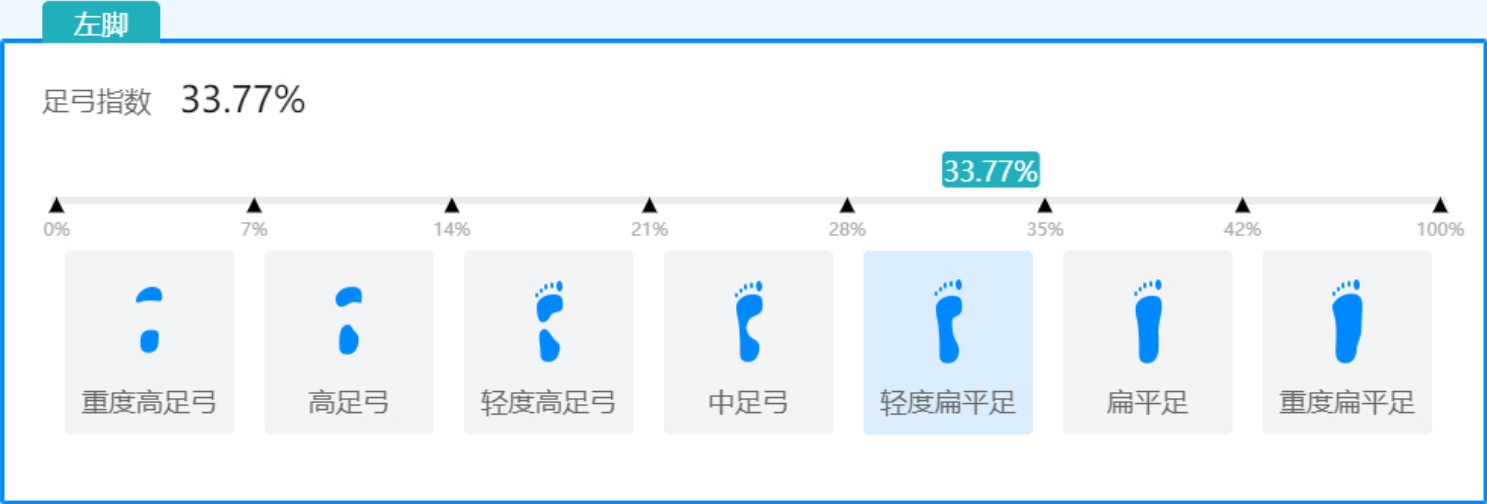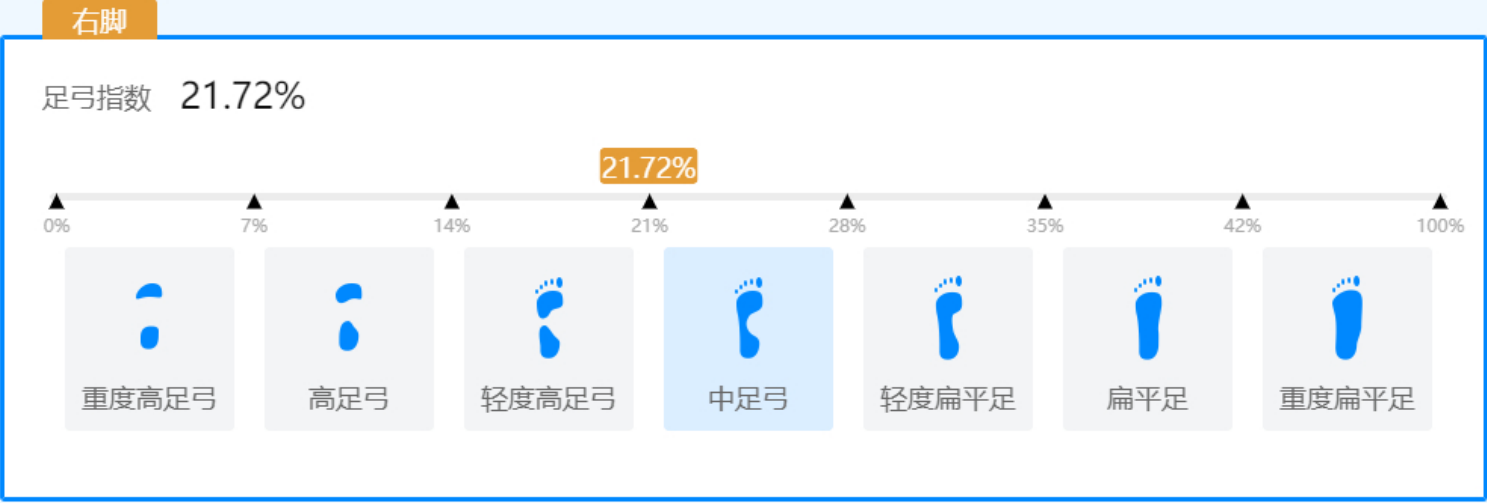

# 动态报告

龚泳霖 18岁 男 70.0kg 177.0cm 2025-2-26 16:58:43

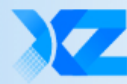

## 报告结论

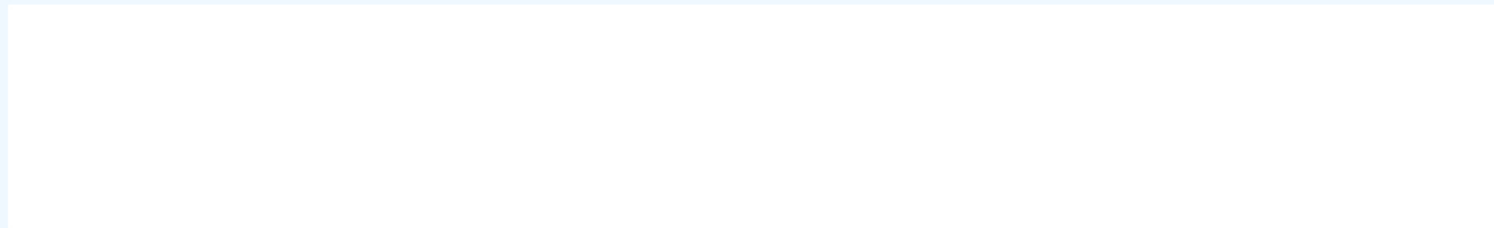

Supplement: Supplementary file 88 [file 动态报告-龚泳霖-20250226165937.pdf › Plantar pressure and gait analysis/jump rope/动态报告-龚泳霖-20250226165937.pdf]
