# Supplementary material for: Individualized Corrective Training Based on Precision Biomechanical Assessment for the Prevention of Sports Injuries in Adolescents
Source: Research Square preprint supplement (doi:10.21203/rs.3.rs-8426574/v1), 2026-02-02
Supplement: Supplementary file 90 [file 平衡报告-丁红丽-20250226135445.pdf › Plantar pressure and gait analysis/jump rope/平衡报告-丁红丽-20250226135445.pdf]

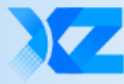

双脚重心变化

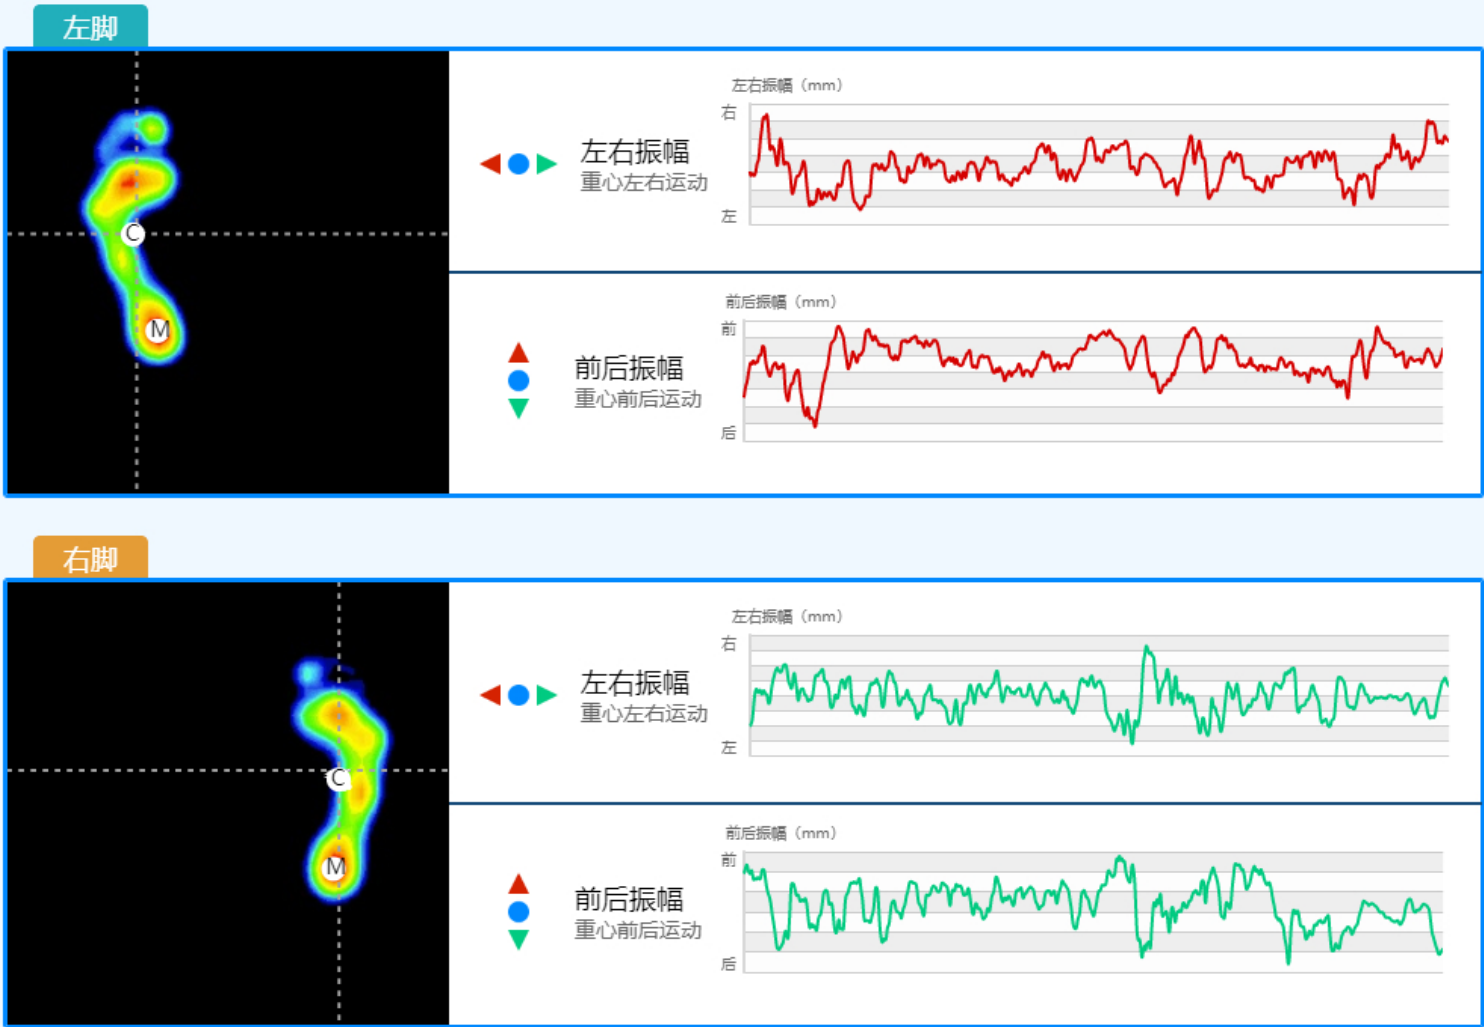

Cop数据

| <div>左脚 右脚</div> | 左脚          | 右脚           |
|------------------|-------------|--------------|
|                  | 平均位置X【mm】   | -3.38-0.29   |
|                  | 平均位置Y【mm】   | -0.62-7.90   |
|                  | 标准差X【mm】    | 2.013.10     |
|                  | 标准差Y【mm】    | 2.023.19     |
|                  | 距离【mm】      | 336.18620.85 |
|                  | 平均速度【mm/ms】 | 0.010.02     |
|                  | 距离/表面积      | 4.413.11     |
|                  | 偏心率         | 0.810.83     |
|                  | 倾斜角度【°】     | -38.93-32.71 |

# 平衡报告

丁红丽 18岁 女 45.0kg 163.0cm 2025-2-26 13:53:35

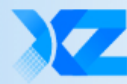

## 报告结论

睁眼  
前后晃动比左右晃动更明显
