# Supplementary material for: Individualized Corrective Training Based on Precision Biomechanical Assessment for the Prevention of Sports Injuries in Adolescents
Source: Research Square preprint supplement (doi:10.21203/rs.3.rs-8426574/v1), 2026-02-02
Supplement: Supplementary file 91 [file 平衡报告-冯佳琳-20250226155213.pdf › Plantar pressure and gait analysis/jump rope/平衡报告-冯佳琳-20250226155213.pdf]

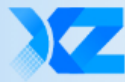

双脚重心变化

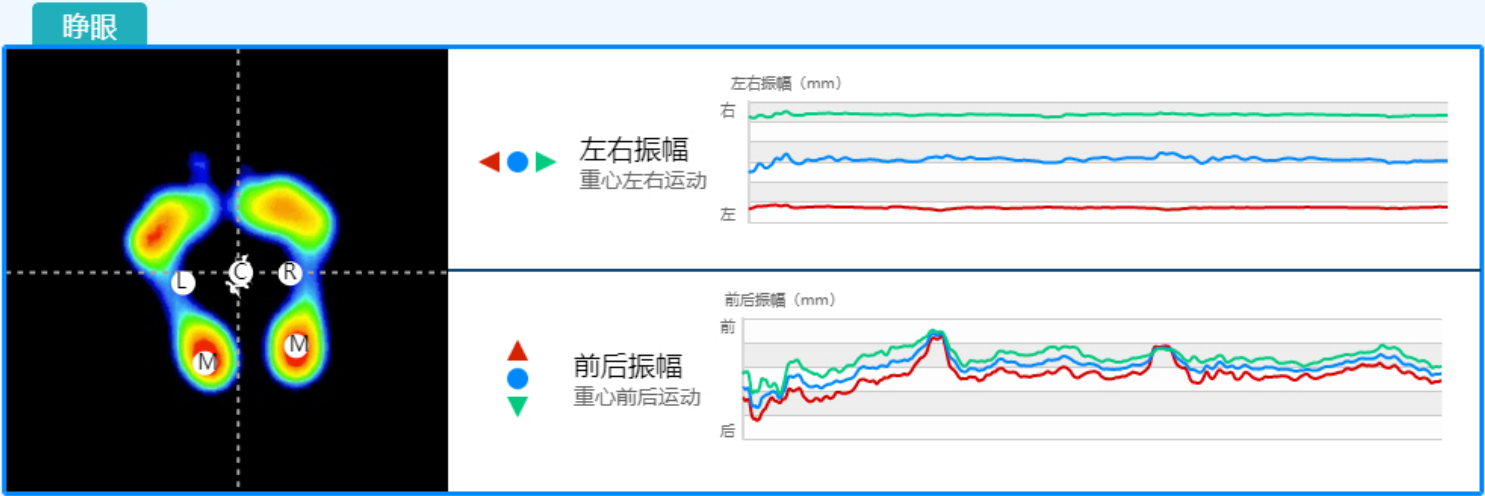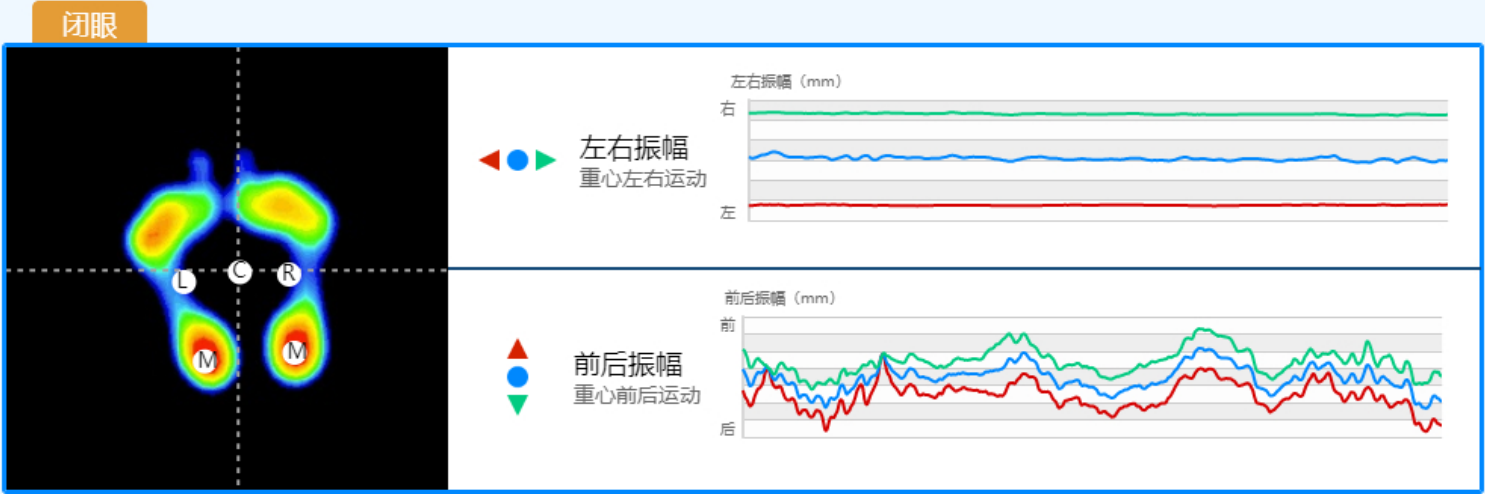

Cop数据

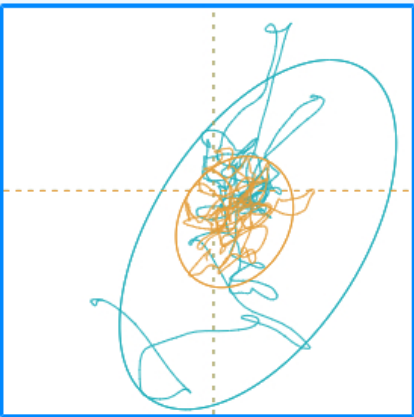

— 睁眼 — 闭眼

|             | 睁眼     | 闭眼     |
|-------------|--------|--------|
| 平均位置X【mm】   | 2.30   | 1.52   |
| 平均位置Y【mm】   | -0.20  | -1.73  |
| 标准差X【mm】    | 2.48   | 1.83   |
| 标准差Y【mm】    | 4.90   | 2.26   |
| 距离【mm】      | 253.51 | 185.41 |
| 平均速度【mm/ms】 | 0.01   | 0.01   |
| 距离/表面积      | 0.58   | 2.35   |
| 偏心率         | 0.85   | 0.63   |
| 倾斜角度【°】     | -57.43 | -58.92 |

平衡报告

冯佳琳 21岁 女 58.0kg 158.0cm 2025-2-26 15:51:02

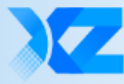

报告结论

睁眼  
前后晃动比左右晃动更明显  
闭眼  
前后晃动比左右晃动更明显
