# Supplementary material for: Individualized Corrective Training Based on Precision Biomechanical Assessment for the Prevention of Sports Injuries in Adolescents
Source: Research Square preprint supplement (doi:10.21203/rs.3.rs-8426574/v1), 2026-02-02
Supplement: Supplementary file 92 [file 平衡报告-冯佳琳-20250226155329.pdf › Plantar pressure and gait analysis/jump rope/平衡报告-冯佳琳-20250226155329.pdf]

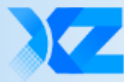

双脚重心变化

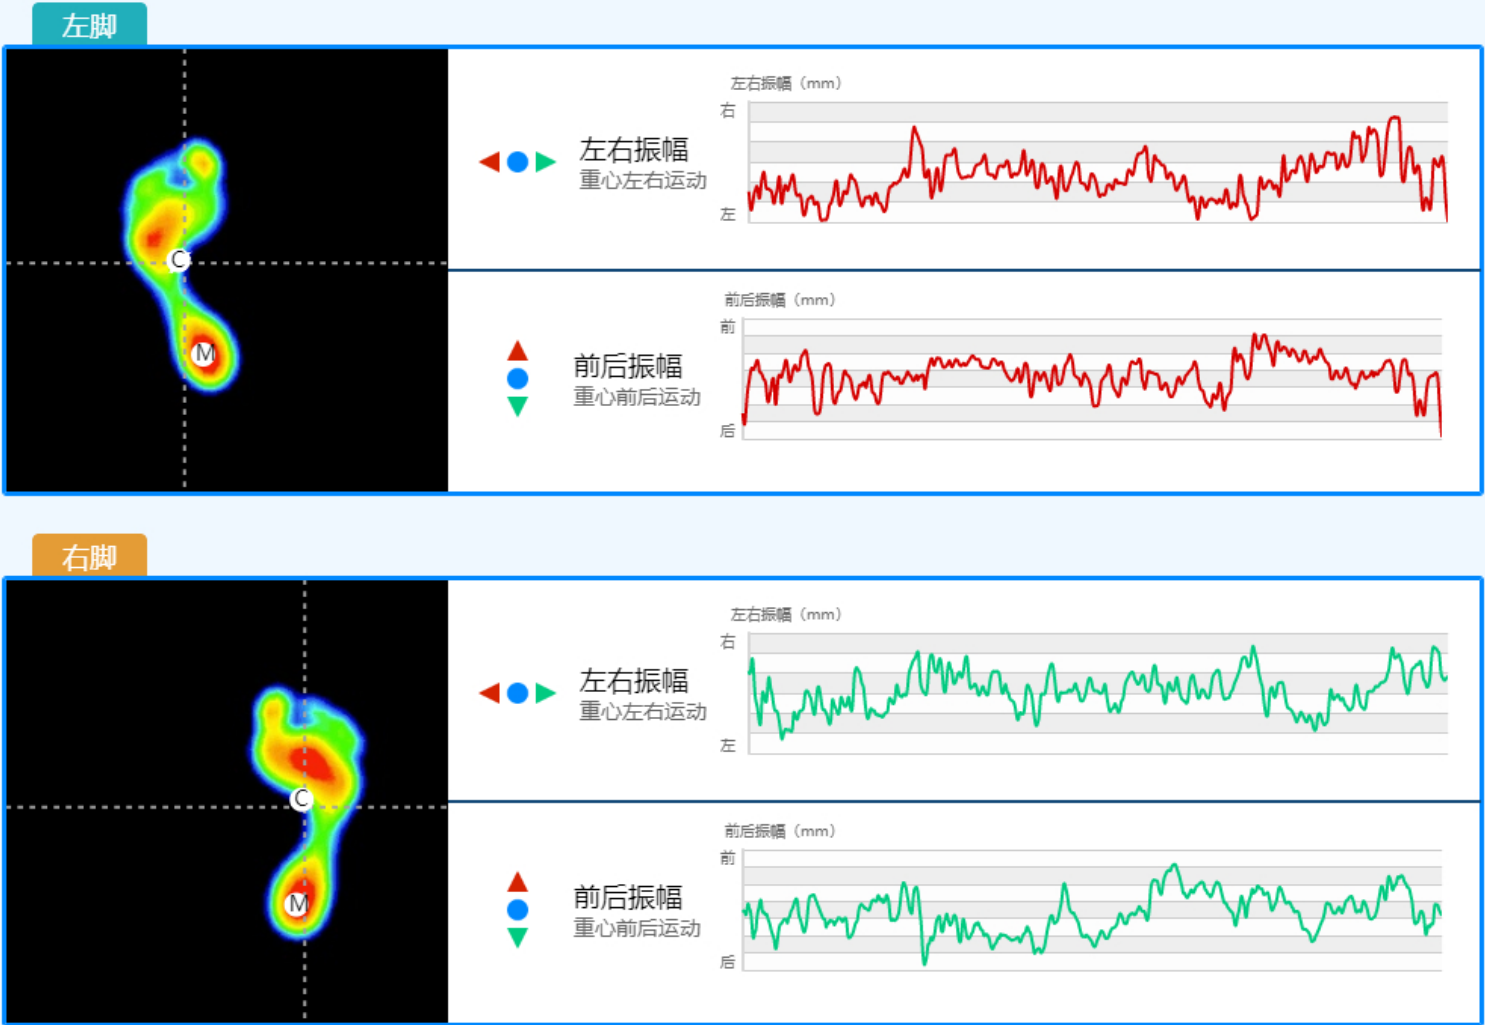

Cop数据

— 左脚    — 右脚

|             | 左脚     | 右脚     |
|-------------|--------|--------|
| 平均位置X【mm】   | -5.40  | -2.71  |
| 平均位置Y【mm】   | 2.14   | 6.60   |
| 标准差X【mm】    | 3.11   | 2.77   |
| 标准差Y【mm】    | 2.74   | 2.23   |
| 距离【mm】      | 568.87 | 461.60 |
| 平均速度【mm/ms】 | 0.02   | 0.02   |
| 距离/表面积      | 3.23   | 4.10   |
| 偏心率         | 0.85   | 0.59   |
| 倾斜角度【°】     | -35.84 | -81.42 |

# 平衡报告

冯佳琳 21岁 女 58.0kg 158.0cm 2025-2-26 15:52:22

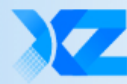

## 报告结论

睁眼  
左右晃动比前后晃动更明显
