# Supplementary material for: Individualized Corrective Training Based on Precision Biomechanical Assessment for the Prevention of Sports Injuries in Adolescents
Source: Research Square preprint supplement (doi:10.21203/rs.3.rs-8426574/v1), 2026-02-02
Supplement: Supplementary file 93 [file 平衡报告-张文茹-20250226124701.pdf › Plantar pressure and gait analysis/jump rope/平衡报告-张文茹-20250226124701.pdf]

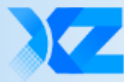

双脚重心变化

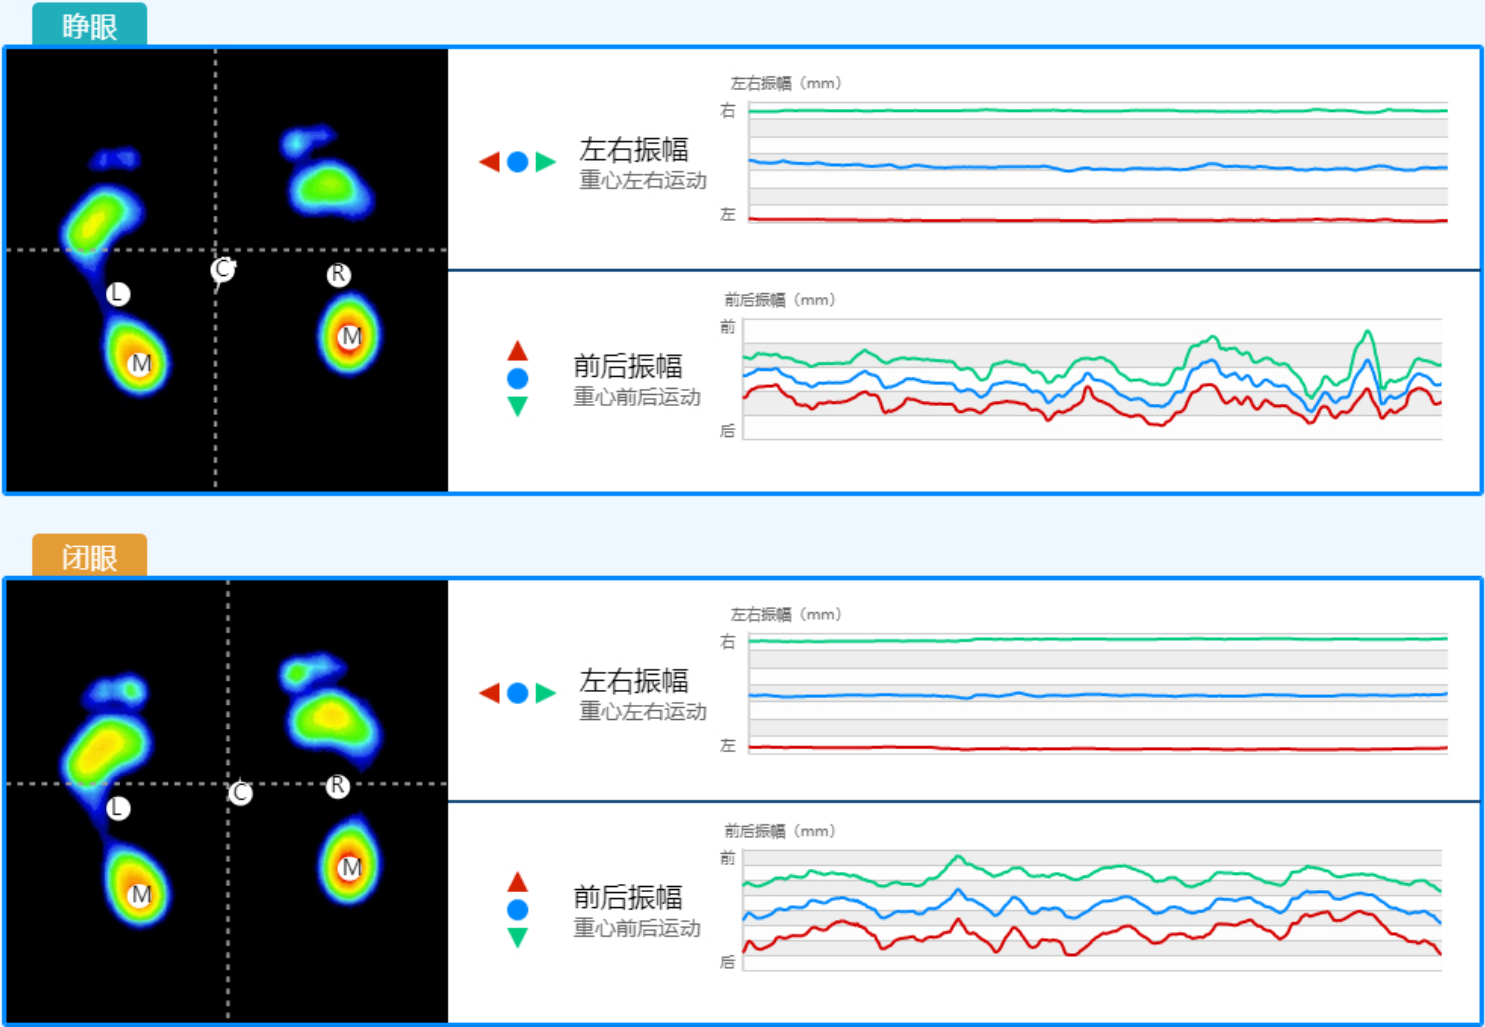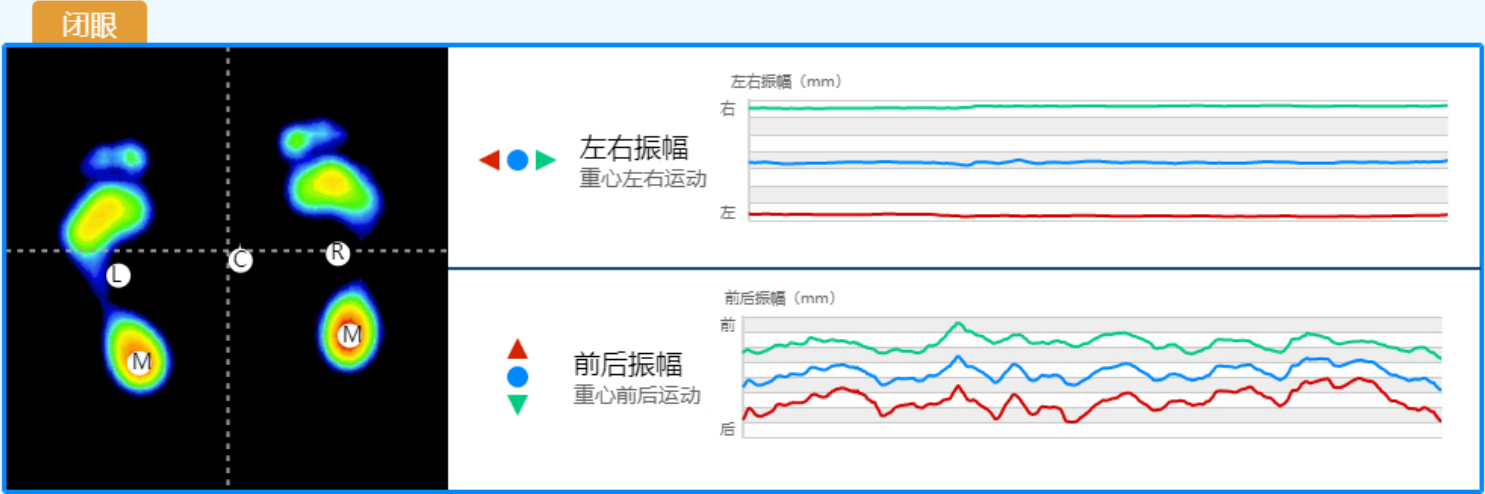

Cop数据

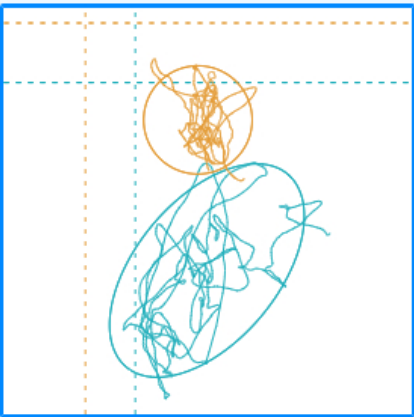

睁眼 闭眼

|             | 睁眼     | 闭眼     |
|-------------|--------|--------|
| 平均位置X【mm】   | 5.99   | 10.83  |
| 平均位置Y【mm】   | -17.69 | -8.61  |
| 标准差X【mm】    | 3.84   | 1.29   |
| 标准差Y【mm】    | 4.46   | 2.41   |
| 距离【mm】      | 271.73 | 150.26 |
| 平均速度【mm/ms】 | 0.01   | 0.01   |
| 距离/表面积      | 1.19   | 2.00   |
| 偏心率         | 0.83   | 0.08   |
| 倾斜角度【°】     | -50.37 | -81.67 |

# 平衡报告

张文茹 20岁 女 54.0kg 166.0cm 2025-2-26 12:45:48

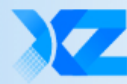

## 报告结论

睁眼  
前后晃动比左右晃动更明显  
闭眼  
前后晃动比左右晃动更明显
