# Supplementary material for: Individualized Corrective Training Based on Precision Biomechanical Assessment for the Prevention of Sports Injuries in Adolescents
Source: Research Square preprint supplement (doi:10.21203/rs.3.rs-8426574/v1), 2026-02-02
Supplement: Supplementary file 94 [file 平衡报告-张文茹-20250226124823.pdf › Plantar pressure and gait analysis/jump rope/平衡报告-张文茹-20250226124823.pdf]

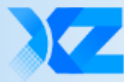

双脚重心变化

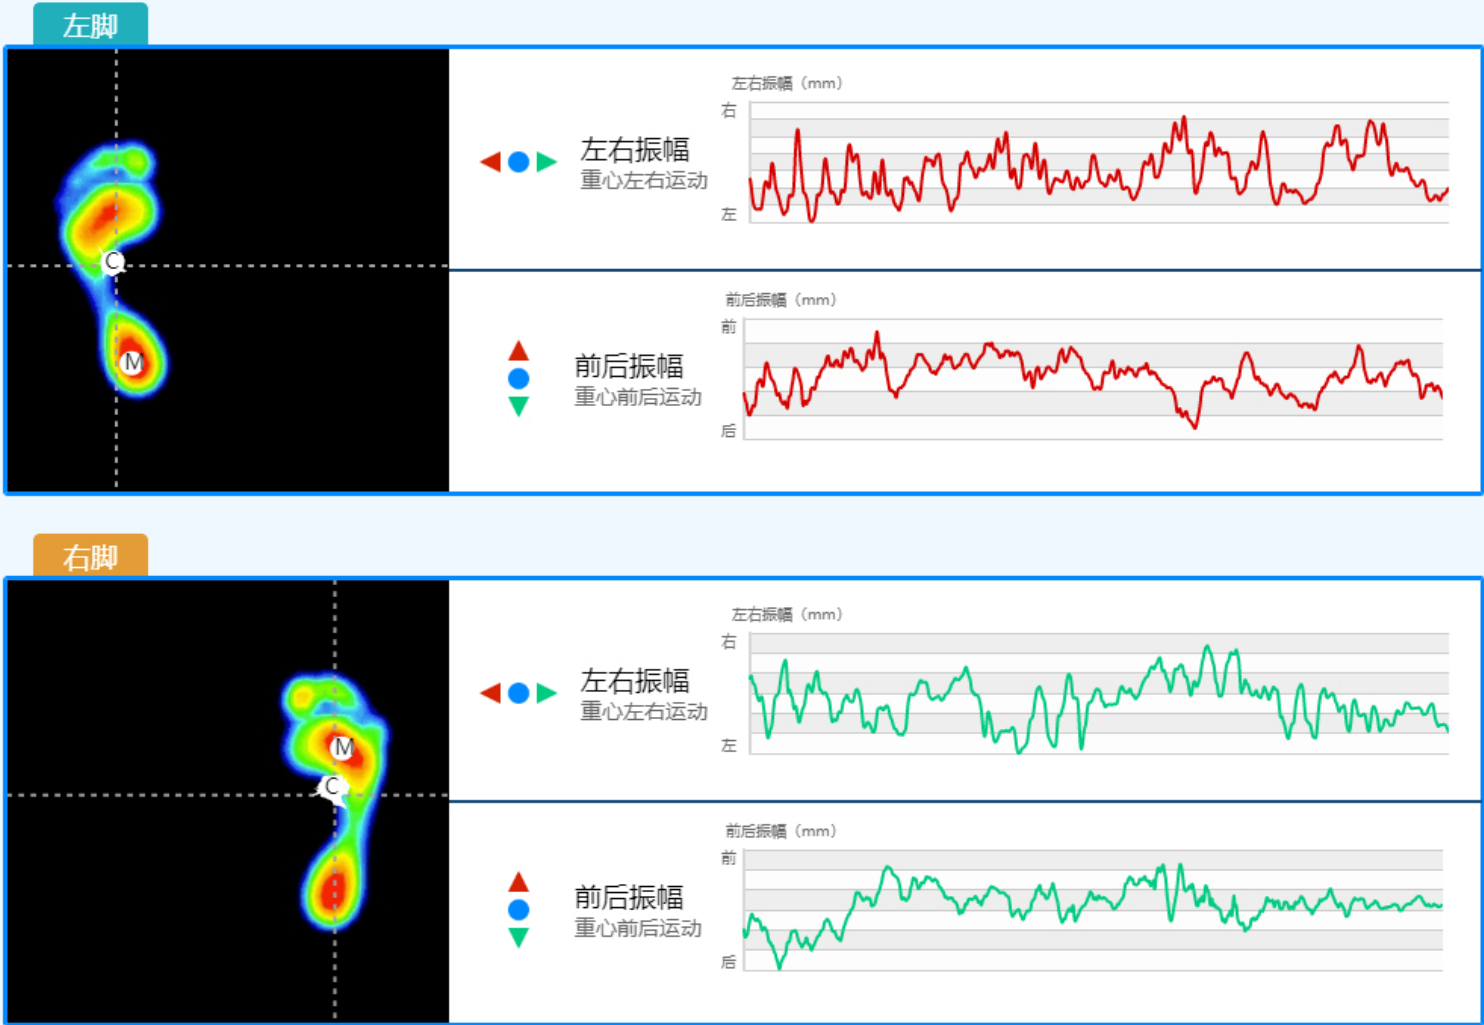

Cop数据

— 左脚 — 右脚

|             | 左脚     | 右脚     |
|-------------|--------|--------|
| 平均位置X【mm】   | -3.58  | -2.22  |
| 平均位置Y【mm】   | 3.03   | 6.23   |
| 标准差X【mm】    | 3.78   | 5.39   |
| 标准差Y【mm】    | 3.60   | 4.50   |
| 距离【mm】      | 599.45 | 704.27 |
| 平均速度【mm/ms】 | 0.02   | 0.02   |
| 距离/表面积      | 2.16   | 1.43   |
| 偏心率         | 0.29   | 0.35   |
| 倾斜角度【°】     | -18.57 | -74.85 |

# 平衡报告

张文茹 20岁 女 54.0kg 166.0cm 2025-2-26 12:47:15

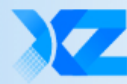

## 报告结论

睁眼  
左右振幅大于参考值  
左右晃动比前后晃动更明显
