# Supplementary material for: Individualized Corrective Training Based on Precision Biomechanical Assessment for the Prevention of Sports Injuries in Adolescents
Source: Research Square preprint supplement (doi:10.21203/rs.3.rs-8426574/v1), 2026-02-02
Supplement: Supplementary file 97 [file 平衡报告-张译丹-20250226164438.pdf › Plantar pressure and gait analysis/jump rope/平衡报告-张译丹-20250226164438.pdf]

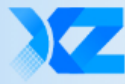

双脚重心变化

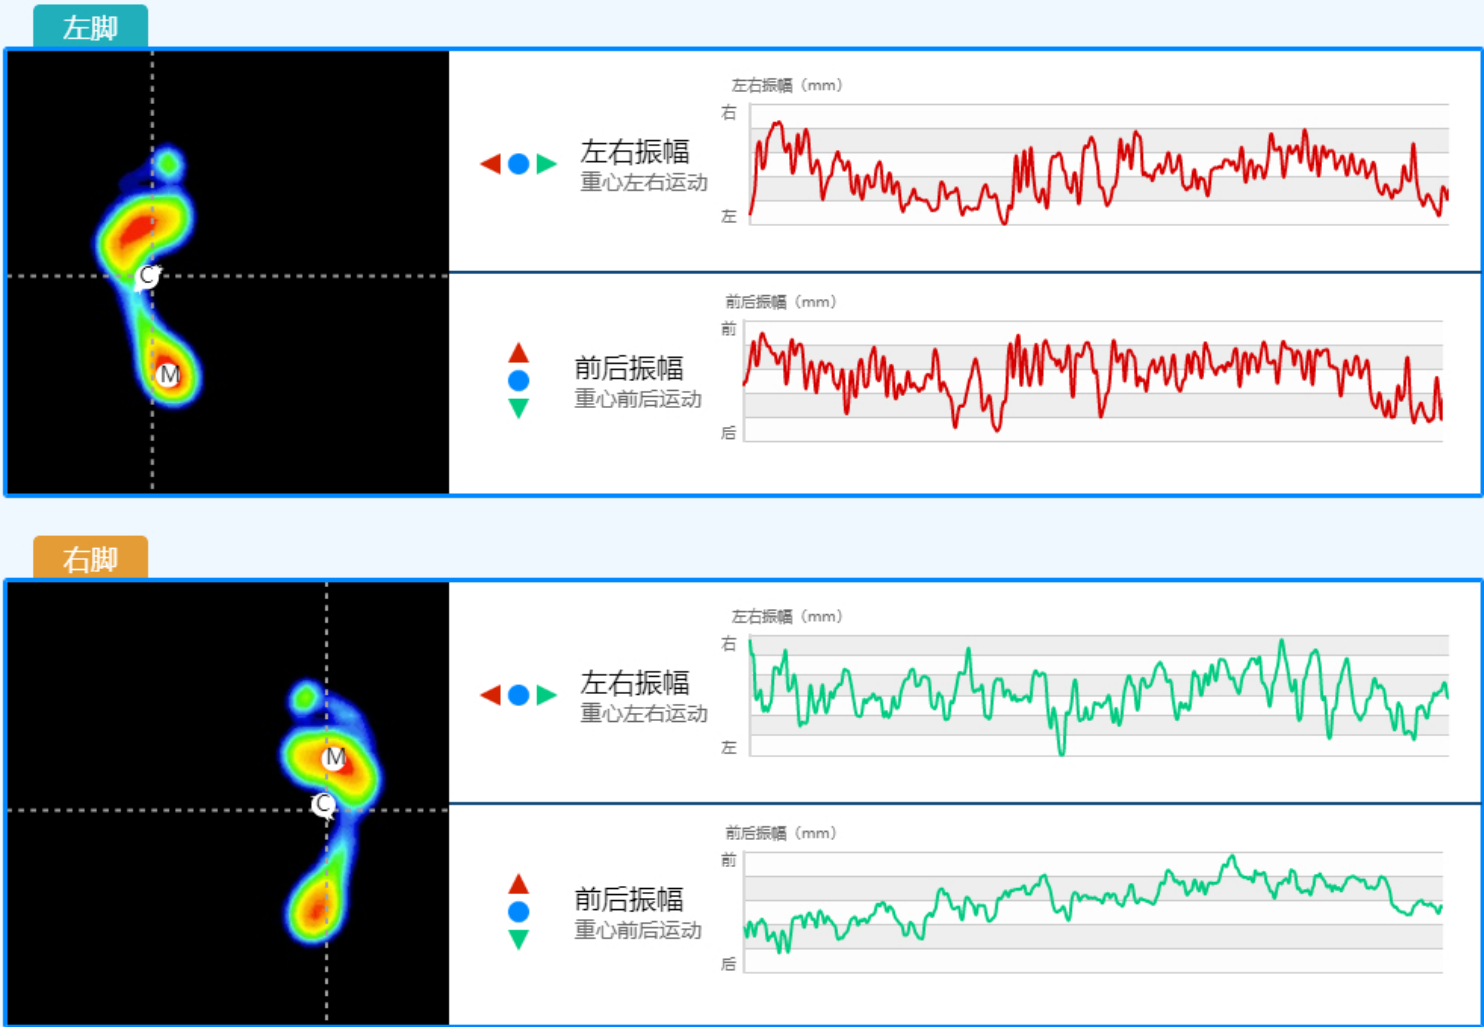

Cop数据

左脚 右脚

|             | 左脚     | 右脚     |
|-------------|--------|--------|
| 平均位置X【mm】   | -4.76  | -2.68  |
| 平均位置Y【mm】   | -1.06  | 4.81   |
| 标准差X【mm】    | 4.47   | 3.04   |
| 标准差Y【mm】    | 4.37   | 3.94   |
| 距离【mm】      | 977.04 | 516.31 |
| 平均速度【mm/ms】 | 0.03   | 0.02   |
| 距离/表面积      | 4.10   | 2.24   |
| 偏心率         | 0.91   | 0.64   |
| 倾斜角度【°】     | -42.66 | -55.24 |

平衡报告

张译丹 19岁 女 56.0kg 160.0cm 2025-2-26 16:37:02

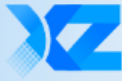

报告结论

睁眼  
前后晃动比左右晃动更明显
