# Supplementary material for: Individualized Corrective Training Based on Precision Biomechanical Assessment for the Prevention of Sports Injuries in Adolescents
Source: Research Square preprint supplement (doi:10.21203/rs.3.rs-8426574/v1), 2026-02-02
Supplement: Supplementary file 98 [file 平衡报告-张译丹-20250226164449.pdf › Plantar pressure and gait analysis/jump rope/平衡报告-张译丹-20250226164449.pdf]

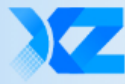

双脚重心变化

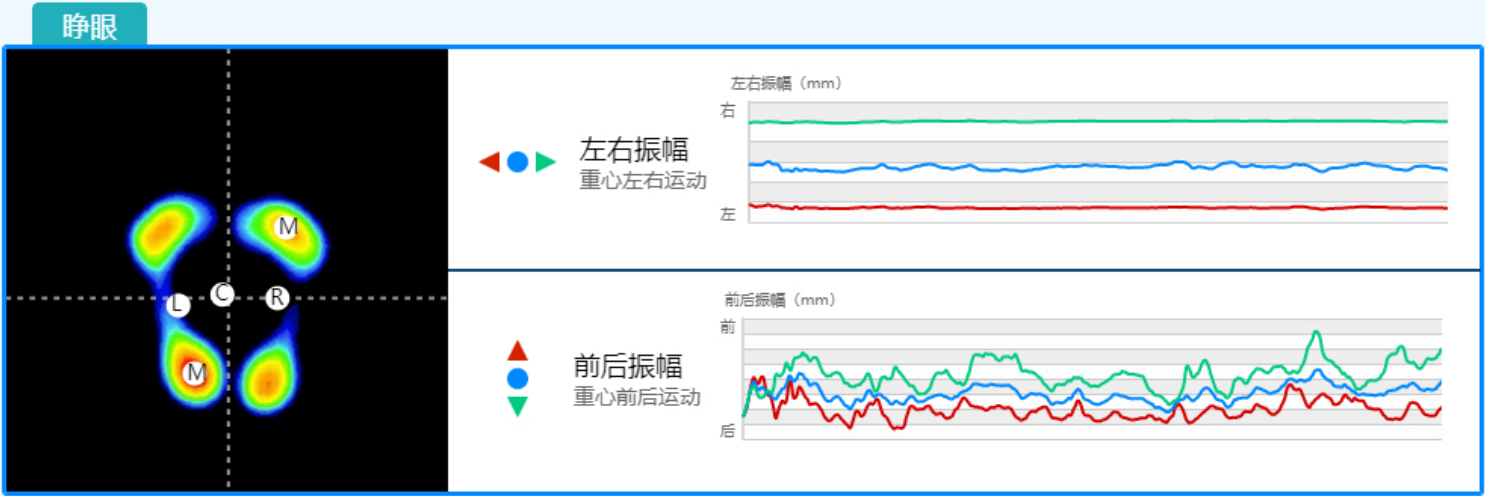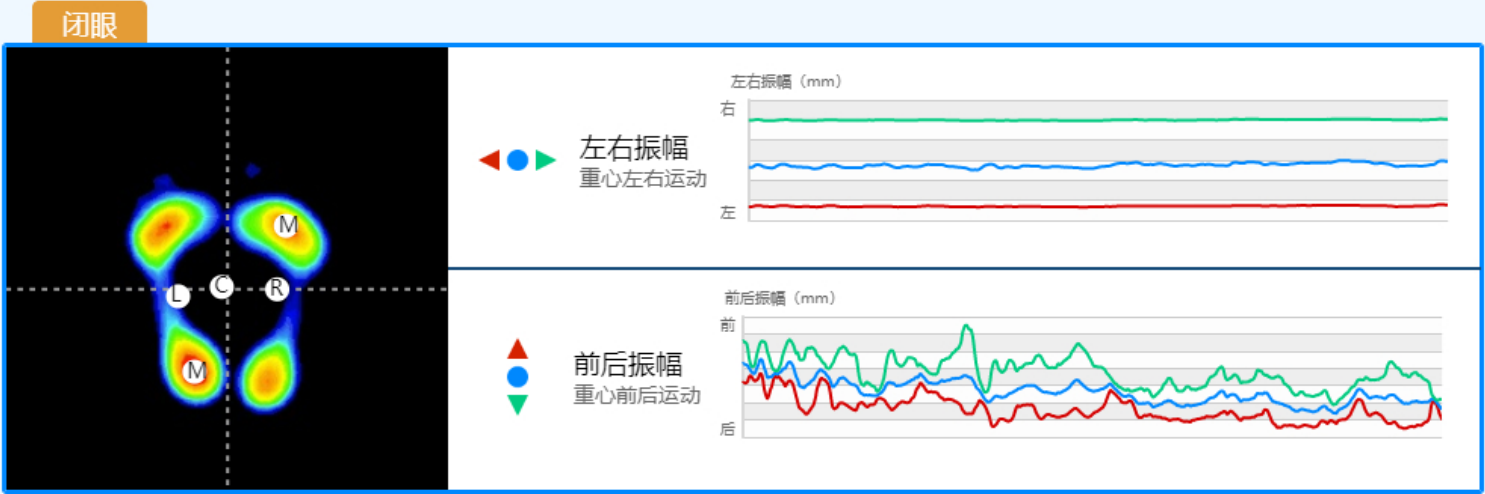

Cop数据

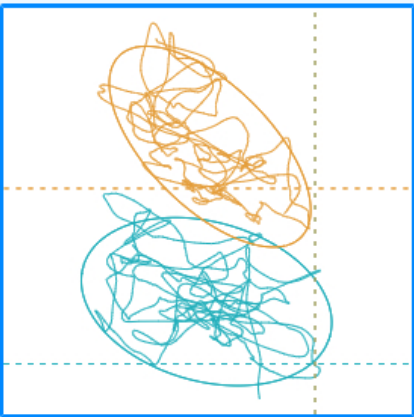

■ 睁眼 ■ 闭眼

|             | 睁眼     | 闭眼     |
|-------------|--------|--------|
| 平均位置X【mm】   | -5.33  | -5.08  |
| 平均位置Y【mm】   | 3.03   | 1.86   |
| 标准差X【mm】    | 2.34   | 2.03   |
| 标准差Y【mm】    | 1.65   | 2.03   |
| 距离【mm】      | 195.18 | 152.54 |
| 平均速度【mm/ms】 | 0.01   | 0.01   |
| 距离/表面积      | 2.95   | 2.99   |
| 偏心率         | 0.78   | 0.88   |
| 倾斜角度【°】     | -74.12 | -44.90 |

平衡报告

张译丹 19岁 女 56.0kg 160.0cm 2025-2-26 16:35:44

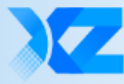

报告结论

睁眼  
左右晃动比前后晃动更明显  
闭眼  
前后晃动比左右晃动更明显
