# Supplementary material for: Individualized Corrective Training Based on Precision Biomechanical Assessment for the Prevention of Sports Injuries in Adolescents
Source: Research Square preprint supplement (doi:10.21203/rs.3.rs-8426574/v1), 2026-02-02
Supplement: Supplementary file 99 [file 平衡报告-杨帆-20250226130822.pdf › Plantar pressure and gait analysis/jump rope/平衡报告-杨帆-20250226130822.pdf]

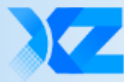

双脚重心变化

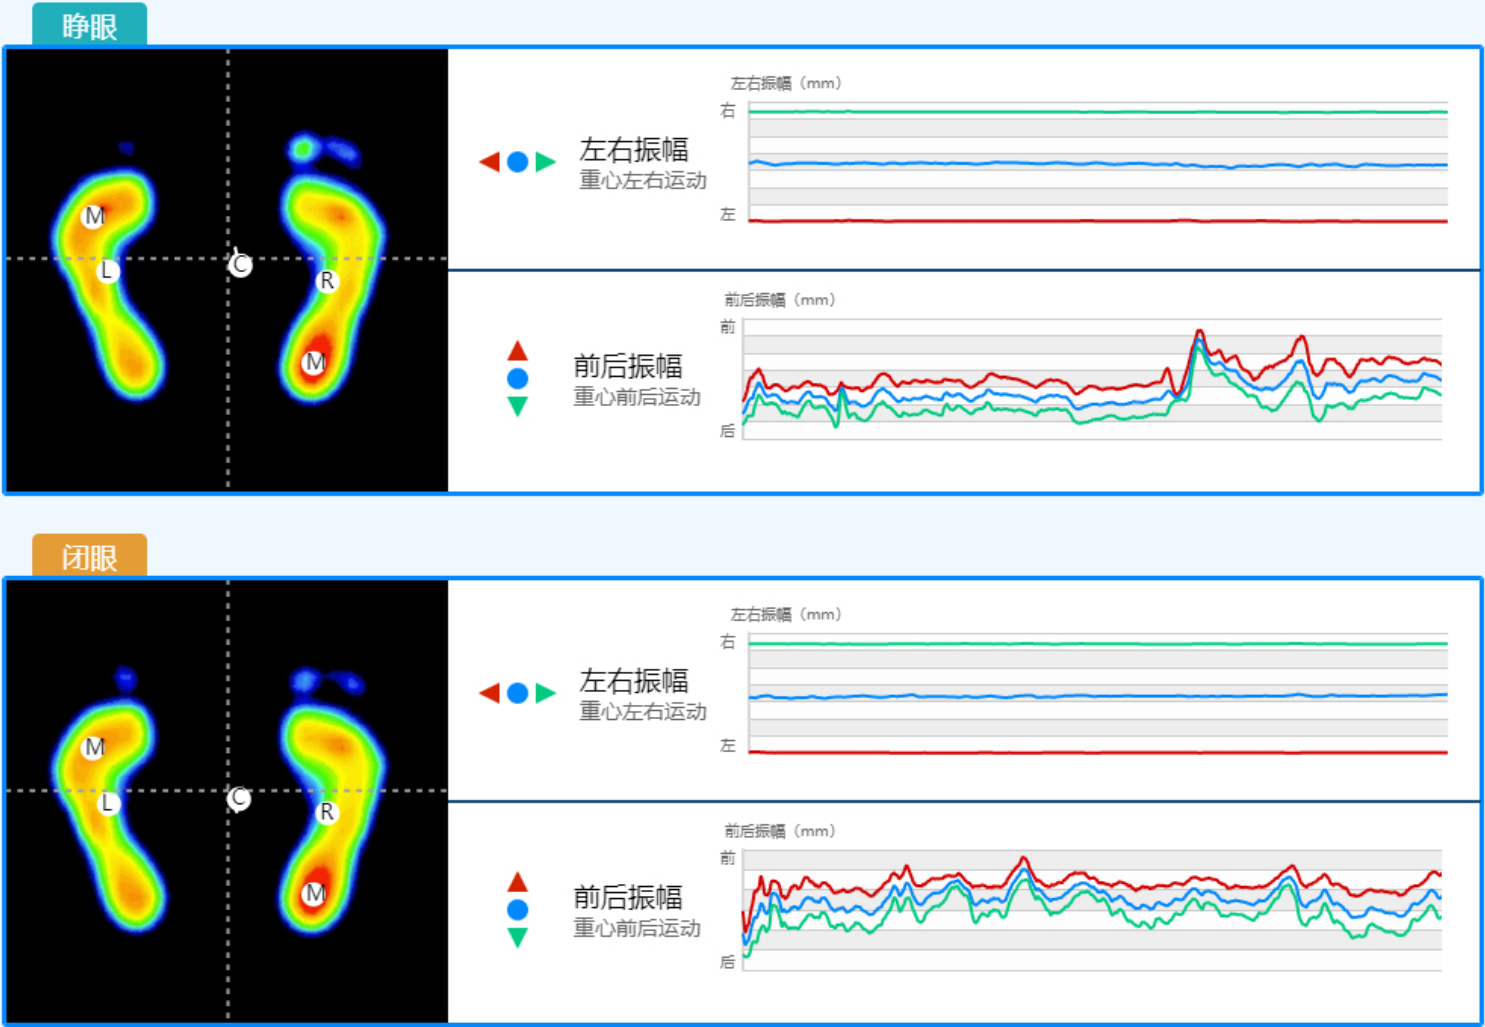

Cop数据

|             | 睁眼     | 闭眼     |
|-------------|--------|--------|
| 平均位置X【mm】   | 10.93  | 9.46   |
| 平均位置Y【mm】   | -6.06  | -7.47  |
| 标准差X【mm】    | 2.17   | 1.29   |
| 标准差Y【mm】    | 3.76   | 2.70   |
| 距离【mm】      | 221.53 | 212.28 |
| 平均速度【mm/ms】 | 0.01   | 0.01   |
| 距离/表面积      | 1.61   | 2.24   |
| 偏心率         | 0.94   | 0.94   |
| 倾斜角度【°】     | -28.57 | -64.80 |

平衡报告

杨帆 23岁 男 75.0kg 172.0cm 2025-2-26 13:07:15

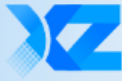

报告结论

睁眼  
前后晃动比左右晃动更明显  
闭眼  
前后晃动比左右晃动更明显
