# Supplementary material for: Individualized Corrective Training Based on Precision Biomechanical Assessment for the Prevention of Sports Injuries in Adolescents
Source: Research Square preprint supplement (doi:10.21203/rs.3.rs-8426574/v1), 2026-02-02
Supplement: Supplementary file 100 [file 平衡报告-杨帆-20250226130943.pdf › Plantar pressure and gait analysis/jump rope/平衡报告-杨帆-20250226130943.pdf]

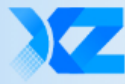

双脚重心变化

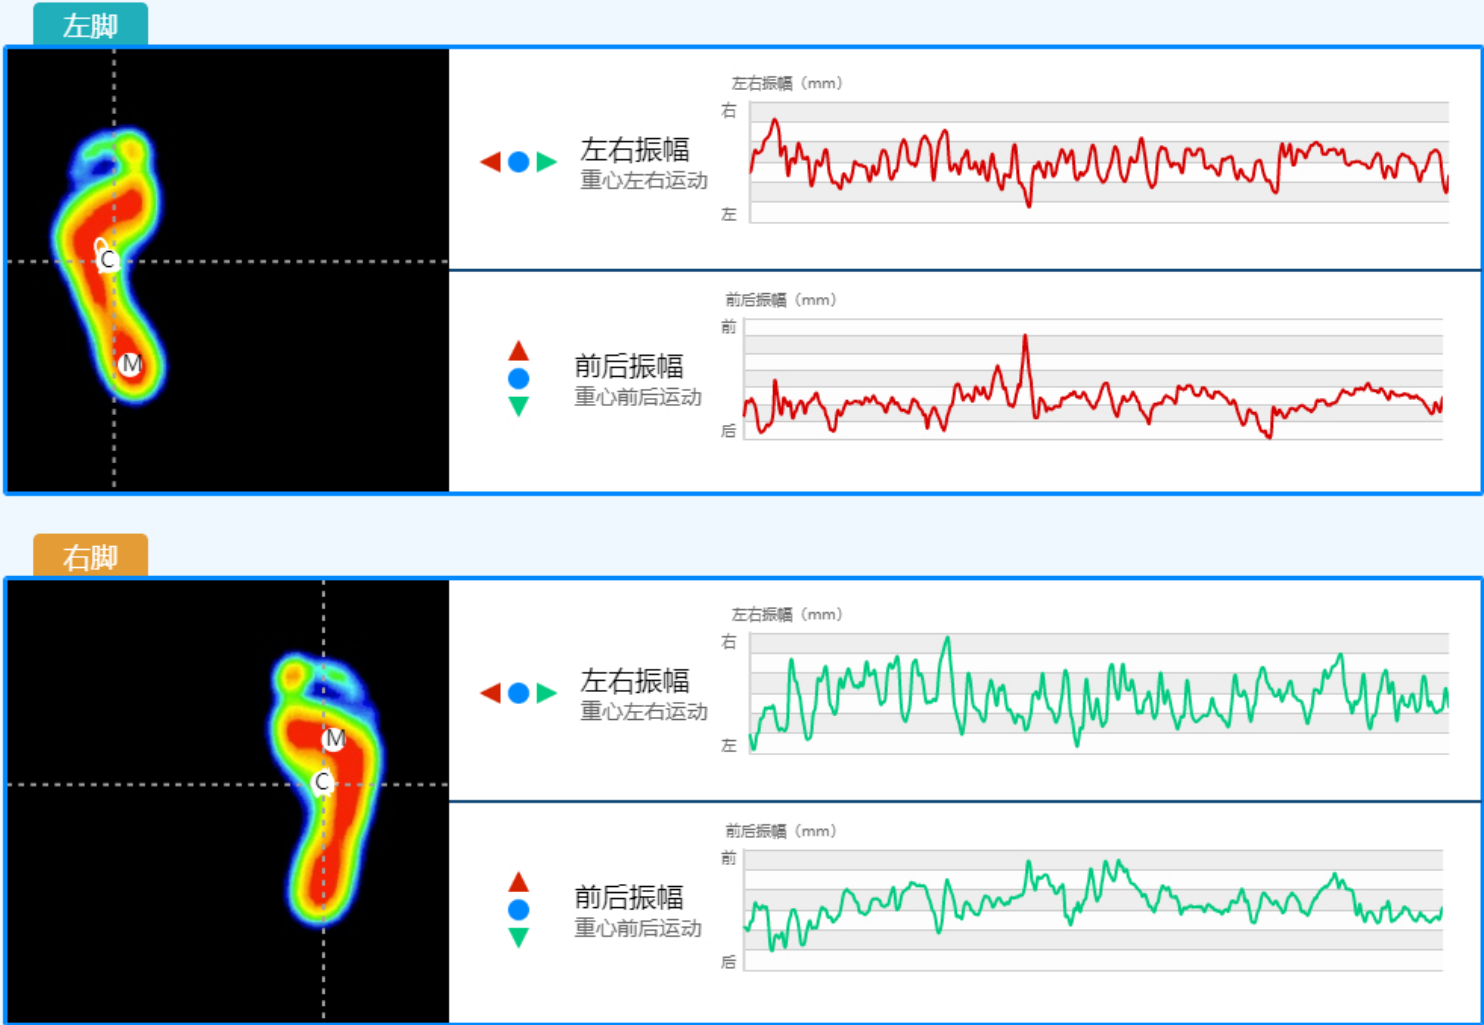

Cop数据

左脚 右脚

|             | 左脚     | 右脚     |
|-------------|--------|--------|
| 平均位置X【mm】   | -5.27  | -0.81  |
| 平均位置Y【mm】   | 0.63   | 1.63   |
| 标准差X【mm】    | 3.40   | 3.00   |
| 标准差Y【mm】    | 3.68   | 3.96   |
| 距离【mm】      | 739.41 | 659.40 |
| 平均速度【mm/ms】 | 0.02   | 0.02   |
| 距离/表面积      | 1.67   | 2.27   |
| 偏心率         | 0.78   | 0.64   |
| 倾斜角度【°】     | -8.94  | -5.09  |

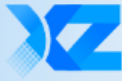

报告结论

睁眼  
前后晃动比左右晃动更明显
