# Supplementary material for: Individualized Corrective Training Based on Precision Biomechanical Assessment for the Prevention of Sports Injuries in Adolescents
Source: Research Square preprint supplement (doi:10.21203/rs.3.rs-8426574/v1), 2026-02-02
Supplement: Supplementary file 101 [file 平衡报告-杨雯杰-20250226134728.pdf › Plantar pressure and gait analysis/jump rope/平衡报告-杨雯杰-20250226134728.pdf]

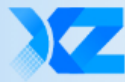

双脚重心变化

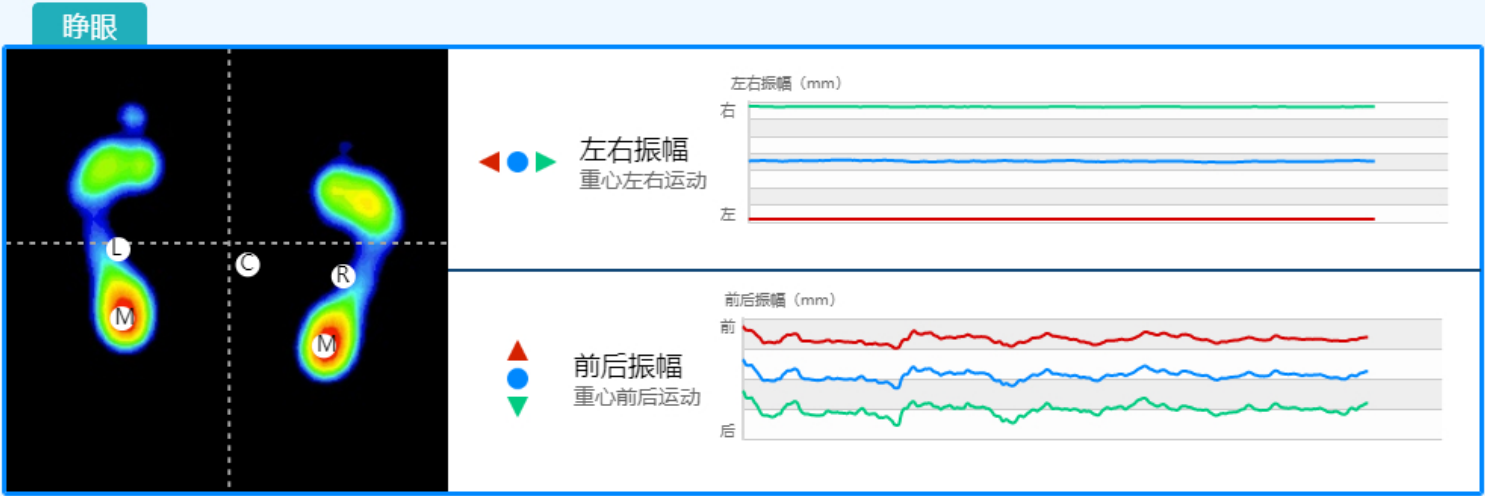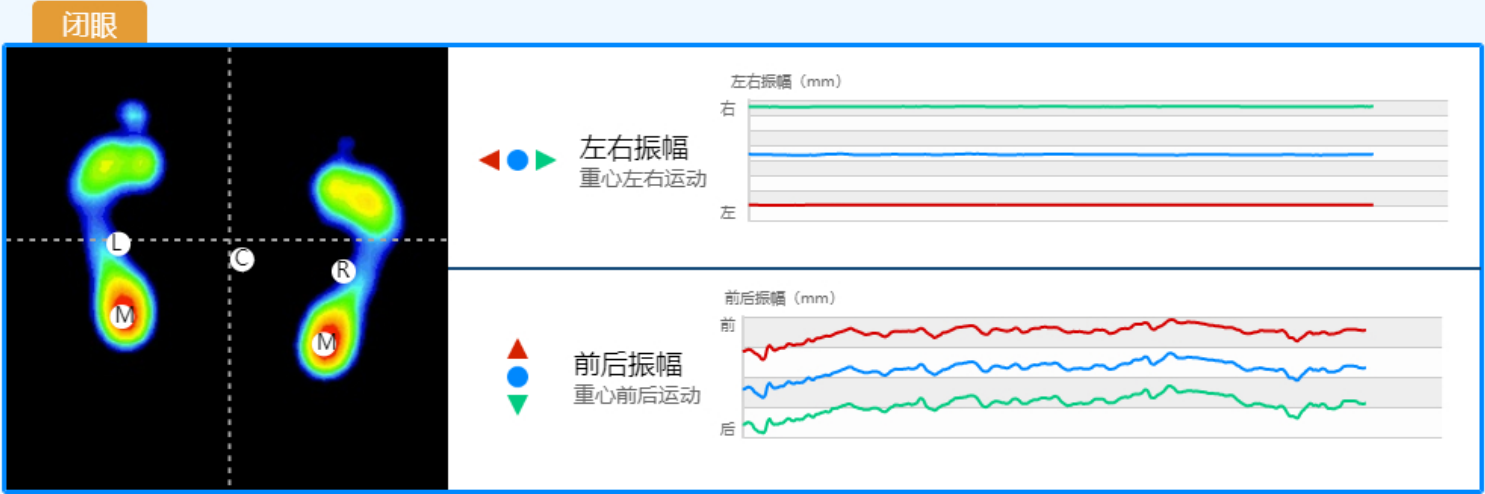

Cop数据

睁眼 闭眼

|             | 睁眼     | 闭眼     |
|-------------|--------|--------|
| 平均位置X【mm】   | 16.30  | 11.09  |
| 平均位置Y【mm】   | -18.94 | -17.32 |
| 标准差X【mm】    | 0.86   | 0.63   |
| 标准差Y【mm】    | 1.36   | 2.56   |
| 距离【mm】      | 115.07 | 114.45 |
| 平均速度【mm/ms】 | 0.00   | 0.00   |
| 距离/表面积      | 3.97   | 3.41   |
| 偏心率         | 0.90   | 0.98   |
| 倾斜角度【°】     | -18.01 | -87.64 |

# 平衡报告

杨雯杰 19岁 女 58.0kg 162.0cm 2025-2-26 13:46:21

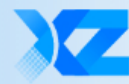

## 报告结论

睁眼  
身体重心位于右后方，骨盆右旋  
前后晃动比左右晃动更明显  
闭眼  
身体重心位于右后方，骨盆右旋  
前后晃动比左右晃动更明显
