# Supplementary material for: Individualized Corrective Training Based on Precision Biomechanical Assessment for the Prevention of Sports Injuries in Adolescents
Source: Research Square preprint supplement (doi:10.21203/rs.3.rs-8426574/v1), 2026-02-02
Supplement: Supplementary file 102 [file 平衡报告-杨雯杰-20250226134853.pdf › Plantar pressure and gait analysis/jump rope/平衡报告-杨雯杰-20250226134853.pdf]

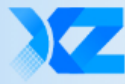

双脚重心变化

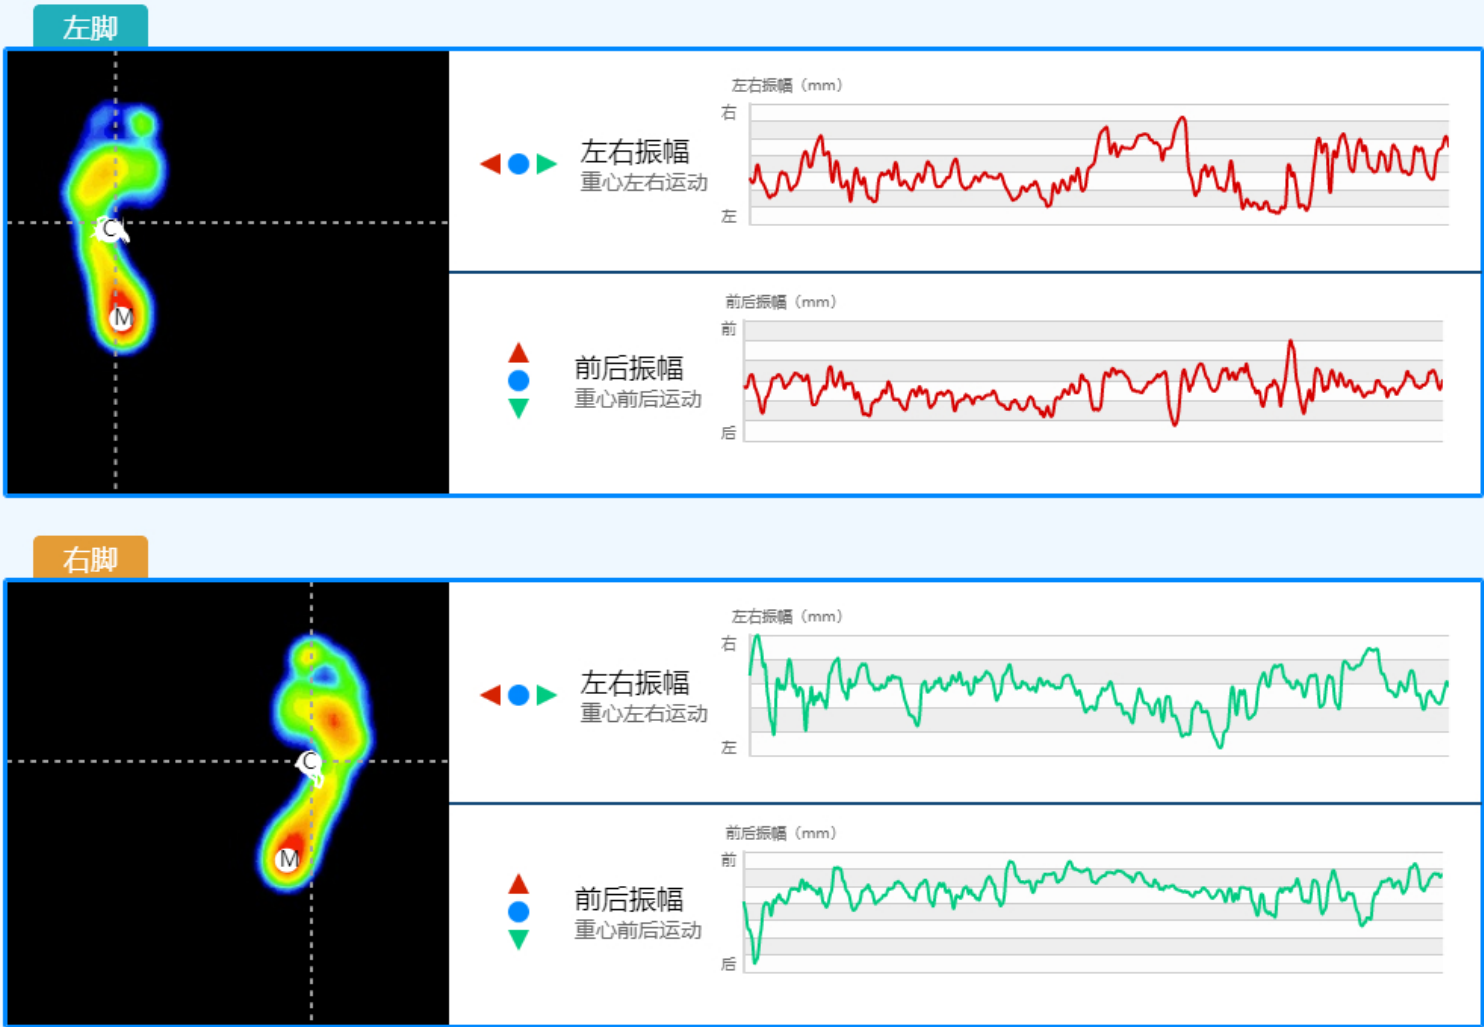

Cop数据

左脚 右脚

|             | 左脚     | 右脚     |
|-------------|--------|--------|
| 平均位置X【mm】   | -4.96  | -1.48  |
| 平均位置Y【mm】   | -7.13  | -1.14  |
| 标准差X【mm】    | 6.13   | 3.98   |
| 标准差Y【mm】    | 3.28   | 4.24   |
| 距离【mm】      | 779.81 | 670.27 |
| 平均速度【mm/ms】 | 0.03   | 0.02   |
| 距离/表面积      | 1.79   | 1.75   |
| 偏心率         | 0.74   | 0.82   |
| 倾斜角度【°】     | -85.05 | -43.61 |

# 平衡报告

杨雯杰 19岁 女 58.0kg 162.0cm 2025-2-26 13:47:44

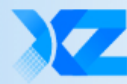

## 报告结论

睁眼  
前后晃动比左右晃动更明显
