# Supplementary material for: Individualized Corrective Training Based on Precision Biomechanical Assessment for the Prevention of Sports Injuries in Adolescents
Source: Research Square preprint supplement (doi:10.21203/rs.3.rs-8426574/v1), 2026-02-02
Supplement: Supplementary file 103 [file 平衡报告-毋梦鑫-20250226164853.pdf › Plantar pressure and gait analysis/jump rope/平衡报告-毋梦鑫-20250226164853.pdf]

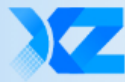

双脚重心变化

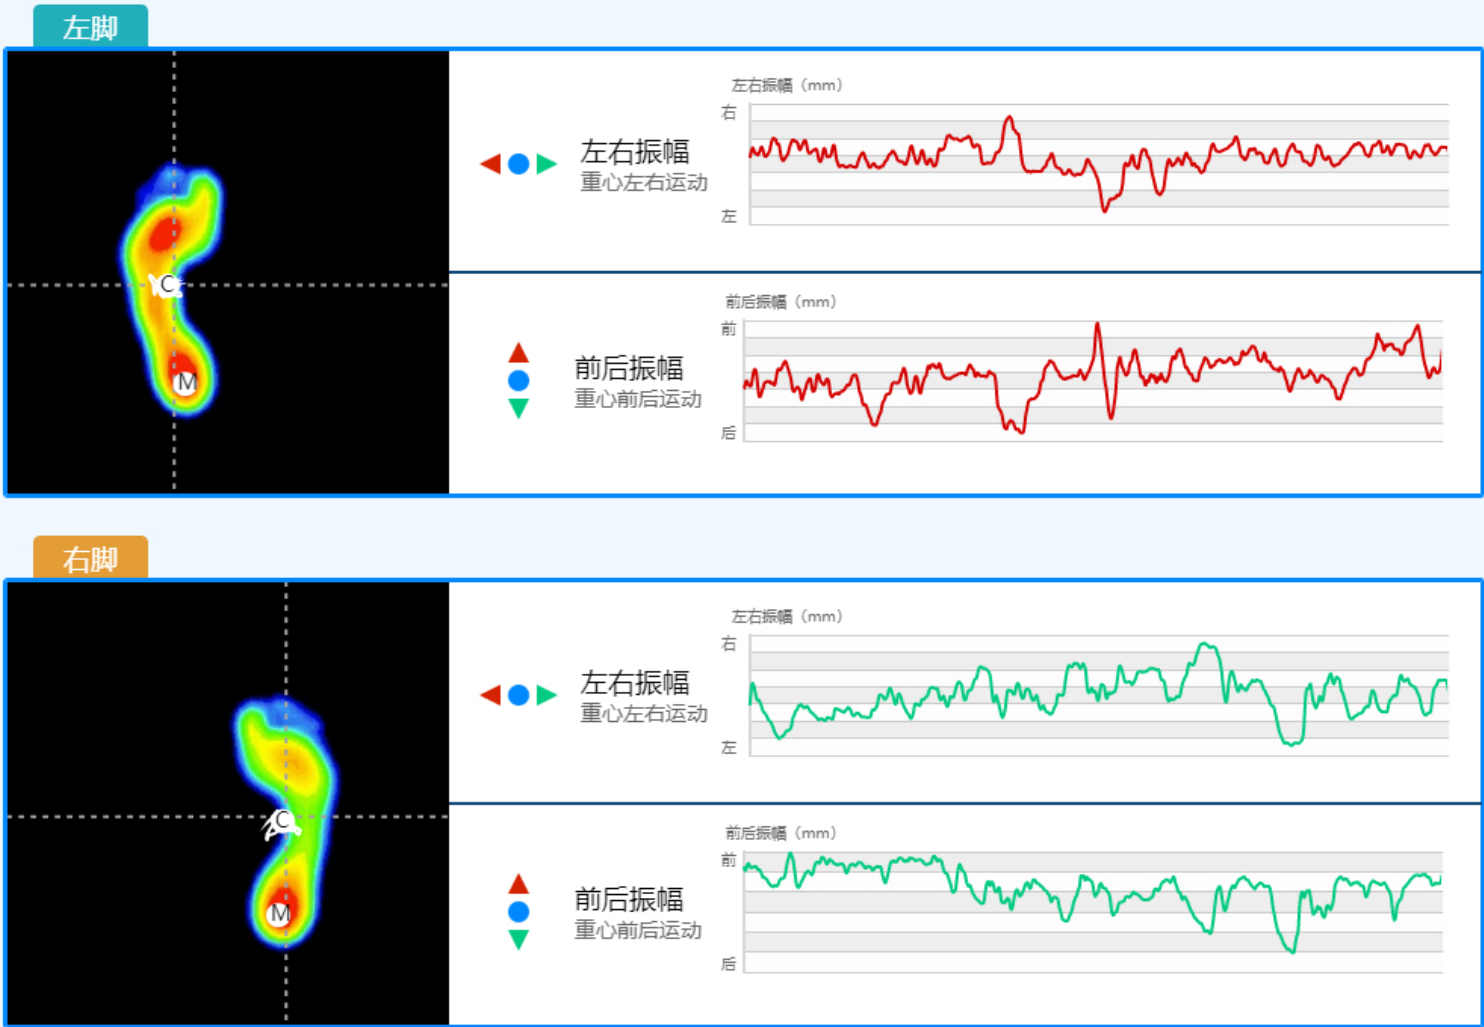

Cop数据

左脚

右脚

|             | 左脚     | 右脚     |
|-------------|--------|--------|
| 平均位置X【mm】   | -5.59  | -2.72  |
| 平均位置Y【mm】   | -0.66  | -3.86  |
| 标准差X【mm】    | 3.99   | 5.83   |
| 标准差Y【mm】    | 3.37   | 4.82   |
| 距离【mm】      | 503.62 | 581.37 |
| 平均速度【mm/ms】 | 0.02   | 0.02   |
| 距离/表面积      | 1.21   | 1.06   |
| 偏心率         | 0.68   | 0.66   |
| 倾斜角度【°】     | -2.75  | -10.04 |

# 平衡报告

毋梦鑫 19岁 女 58.0kg 162.0cm 2025-2-26 16:19:02

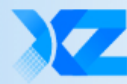

## 报告结论

睁眼  
左右振幅大于参考值  
左右晃动比前后晃动更明显
