# Supplementary material for: Individualized Corrective Training Based on Precision Biomechanical Assessment for the Prevention of Sports Injuries in Adolescents
Source: Research Square preprint supplement (doi:10.21203/rs.3.rs-8426574/v1), 2026-02-02
Supplement: Supplementary file 105 [file 平衡报告-王淑欣-20250226125822.pdf › Plantar pressure and gait analysis/jump rope/平衡报告-王淑欣-20250226125822.pdf]

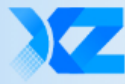

双脚重心变化

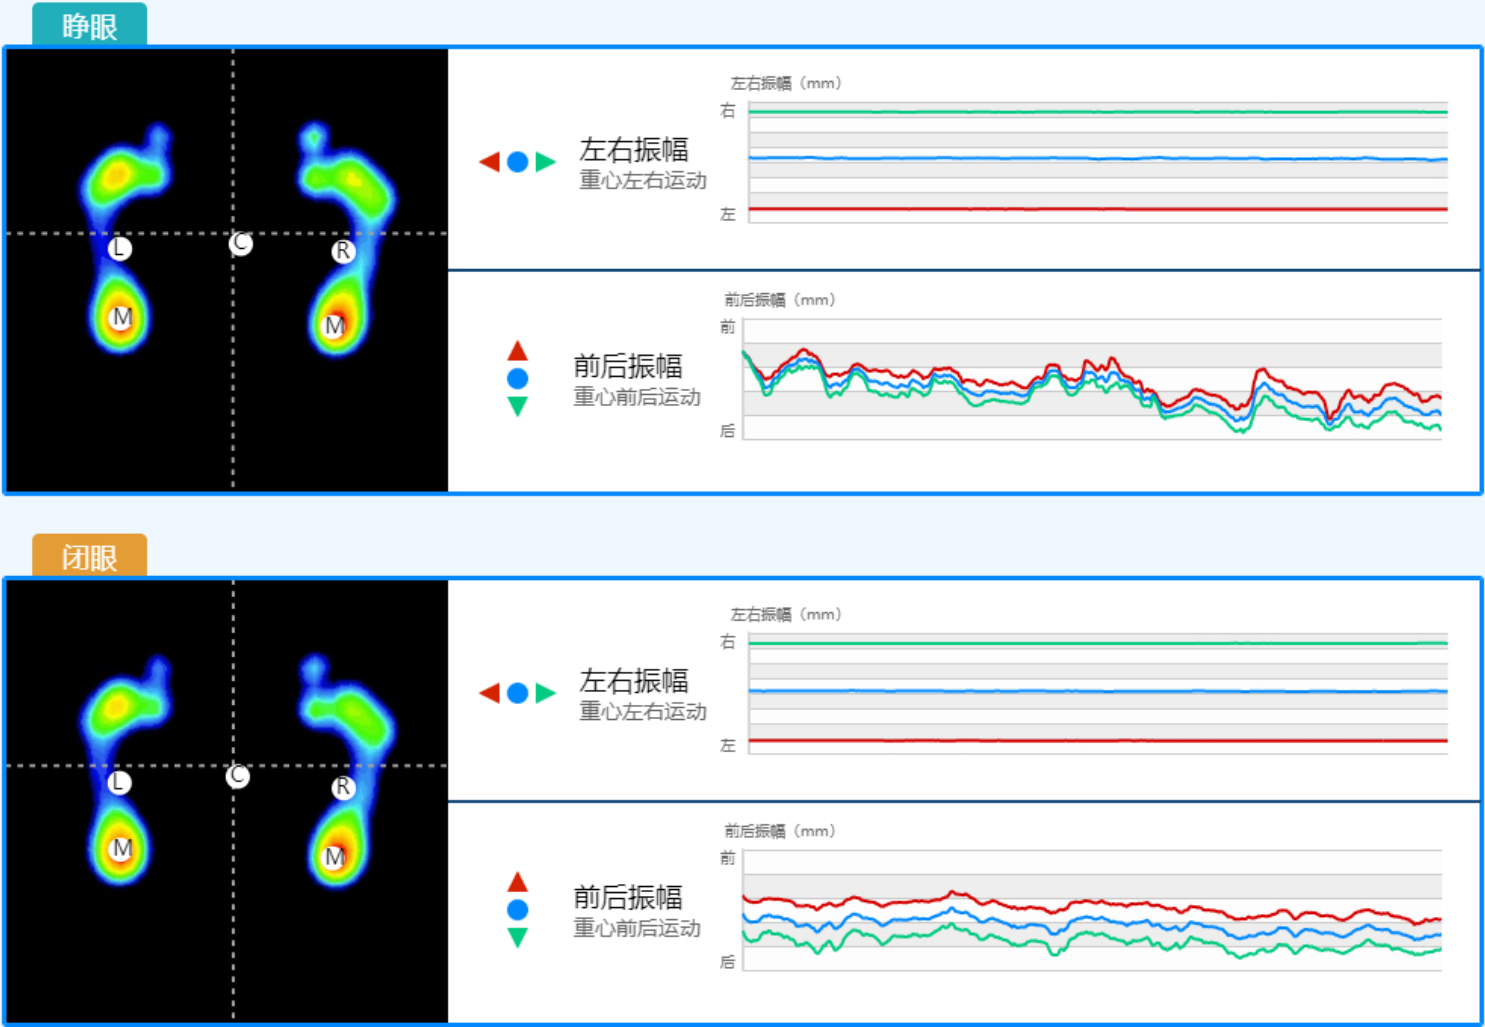

Cop数据

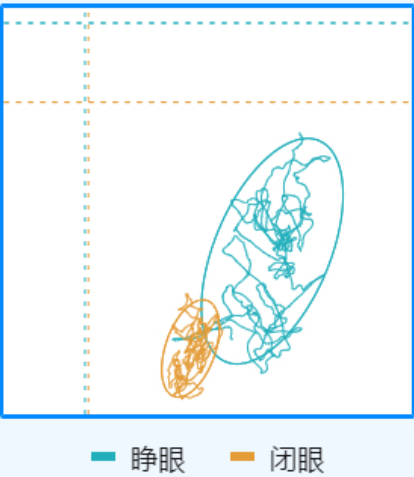

|             | 睁眼     | 闭眼     |
|-------------|--------|--------|
| 平均位置X【mm】   | 6.96   | 3.90   |
| 平均位置Y【mm】   | -9.09  | -9.45  |
| 标准差X【mm】    | 0.95   | 0.43   |
| 标准差Y【mm】    | 1.97   | 0.87   |
| 距离【mm】      | 108.73 | 58.45  |
| 平均速度【mm/ms】 | 0.00   | 0.00   |
| 距离/表面积      | 3.51   | 10.36  |
| 偏心率         | 0.88   | 0.87   |
| 倾斜角度【°】     | -67.19 | -71.13 |

# 平衡报告

王淑欣 19岁 女 52.0kg 161.0cm 2025-2-26 12:57:16

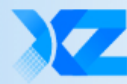

## 报告结论

睁眼  
前后晃动比左右晃动更明显  
闭眼  
前后晃动比左右晃动更明显
