# Supplementary material for: Individualized Corrective Training Based on Precision Biomechanical Assessment for the Prevention of Sports Injuries in Adolescents
Source: Research Square preprint supplement (doi:10.21203/rs.3.rs-8426574/v1), 2026-02-02
Supplement: Supplementary file 106 [file 平衡报告-王淑欣-20250304091426.pdf › Plantar pressure and gait analysis/jump rope/平衡报告-王淑欣-20250304091426.pdf]

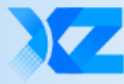

双脚重心变化

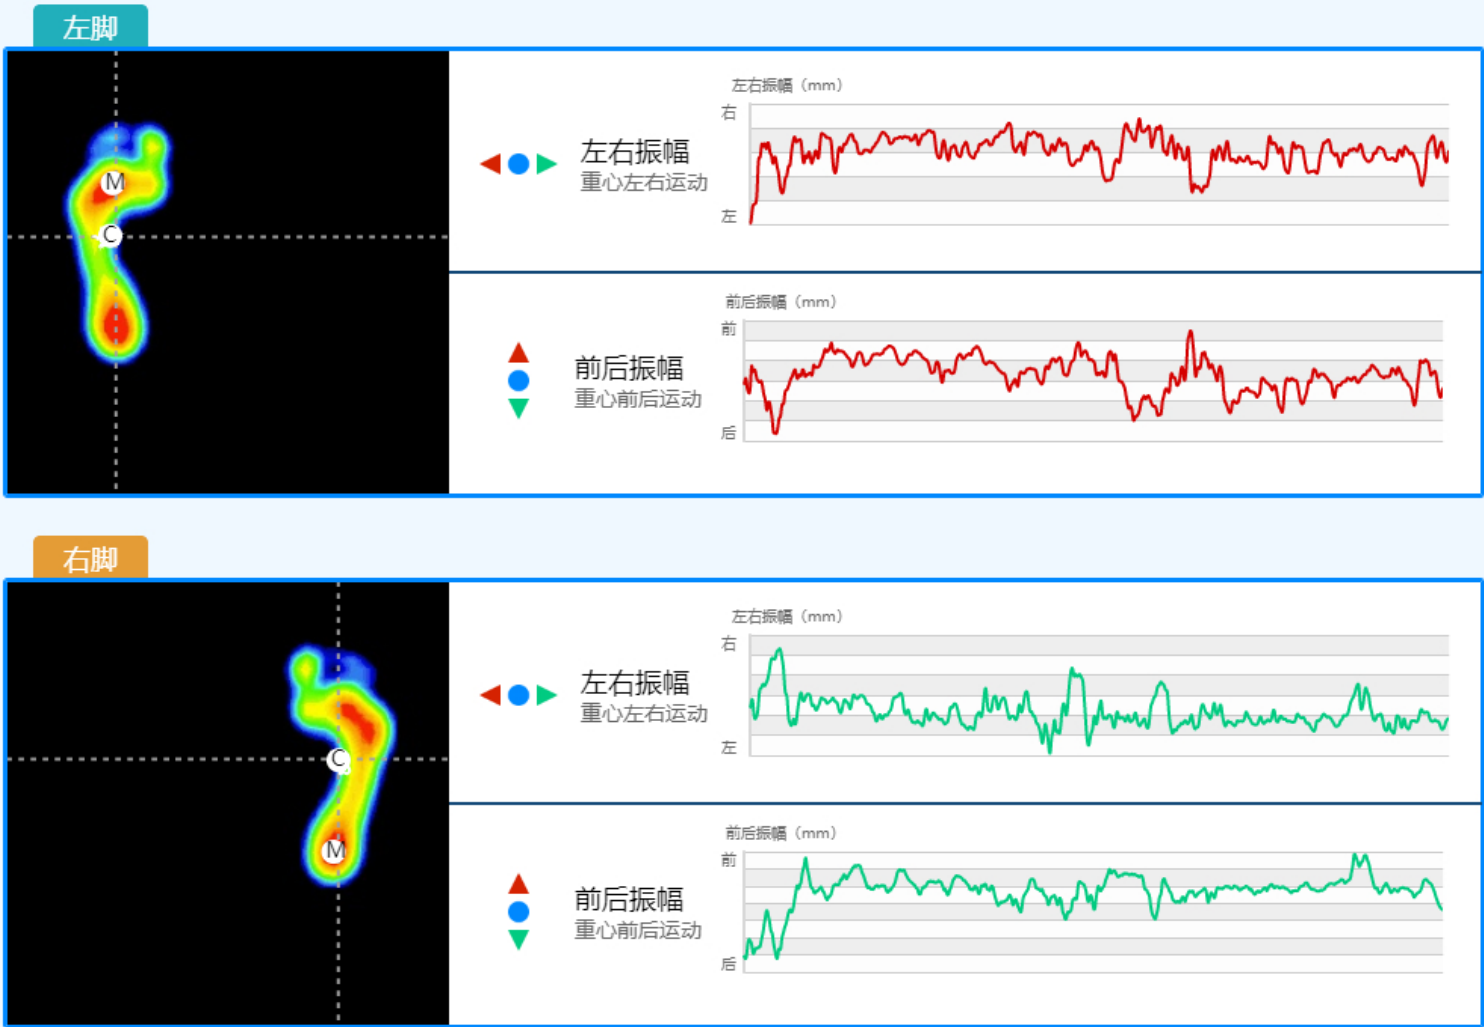

Cop数据

左脚 右脚

|             | 左脚     | 右脚     |
|-------------|--------|--------|
| 平均位置X【mm】   | -4.94  | 0.44   |
| 平均位置Y【mm】   | 0.88   | -0.88  |
| 标准差X【mm】    | 3.11   | 2.28   |
| 标准差Y【mm】    | 2.66   | 2.91   |
| 距离【mm】      | 503.23 | 394.50 |
| 平均速度【mm/ms】 | 0.02   | 0.01   |
| 距离/表面积      | 2.02   | 2.34   |
| 偏心率         | 0.68   | 0.82   |
| 倾斜角度【°】     | -7.81  | -32.55 |

# 平衡报告

王淑欣 19岁 女 52.0kg 161.0cm 2025-2-26 12:58:43

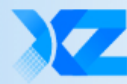

## 报告结论

睁眼  
前后晃动比左右晃动更明显
