# Supplementary material for: Individualized Corrective Training Based on Precision Biomechanical Assessment for the Prevention of Sports Injuries in Adolescents
Source: Research Square preprint supplement (doi:10.21203/rs.3.rs-8426574/v1), 2026-02-02
Supplement: Supplementary file 107 [file 平衡报告-王耀彬-20250226131438.pdf › Plantar pressure and gait analysis/jump rope/平衡报告-王耀彬-20250226131438.pdf]

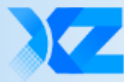

双脚重心变化

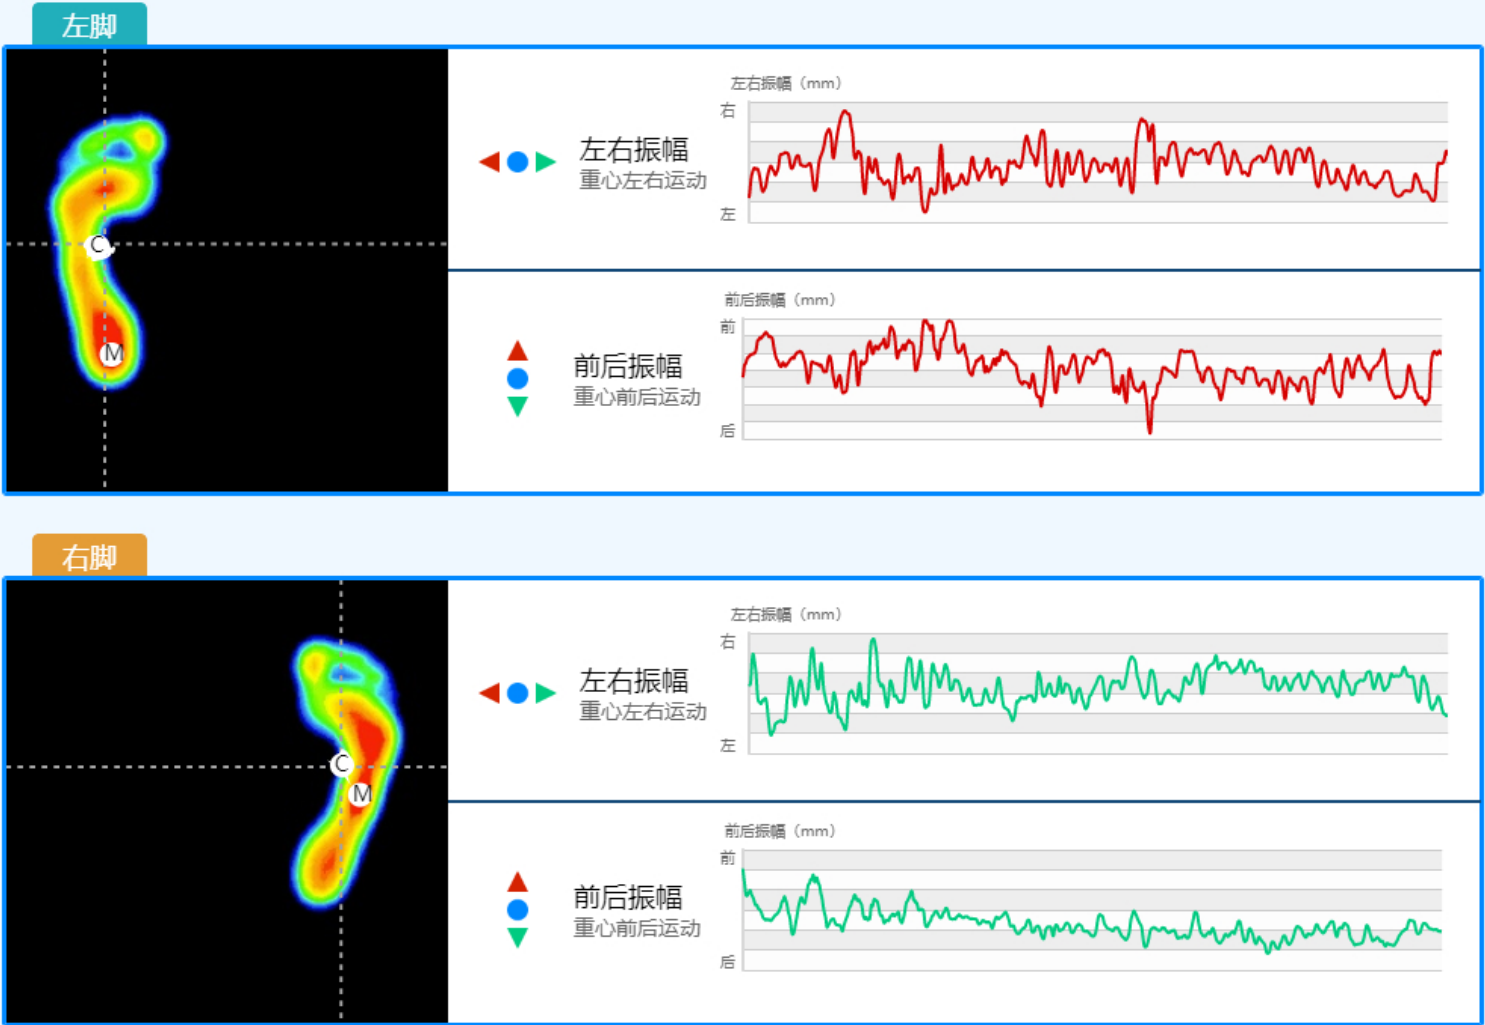

Cop数据

| <div>左脚 右脚</div> | 左脚          | 右脚           |
|------------------|-------------|--------------|
|                  | 平均位置X【mm】   | -6.200.89    |
|                  | 平均位置Y【mm】   | -2.631.39    |
|                  | 标准差X【mm】    | 4.392.36     |
|                  | 标准差Y【mm】    | 3.223.46     |
|                  | 距离【mm】      | 769.66524.07 |
|                  | 平均速度【mm/ms】 | 0.030.02     |
|                  | 距离/表面积      | 2.223.00     |
|                  | 偏心率         | 0.610.69     |
|                  | 倾斜角度【°】     | -53.02-58.90 |

# 平衡报告

王耀彬 22岁 男 62.0kg 170.0cm 2025-2-26 13:13:30

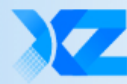

## 报告结论

睁眼  
前后晃动比左右晃动更明显
