# Supplementary material for: Individualized Corrective Training Based on Precision Biomechanical Assessment for the Prevention of Sports Injuries in Adolescents
Source: Research Square preprint supplement (doi:10.21203/rs.3.rs-8426574/v1), 2026-02-02
Supplement: Supplementary file 108 [file 平衡报告-王耀彬-20250226141354.pdf › Plantar pressure and gait analysis/jump rope/平衡报告-王耀彬-20250226141354.pdf]

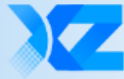

双脚重心变化

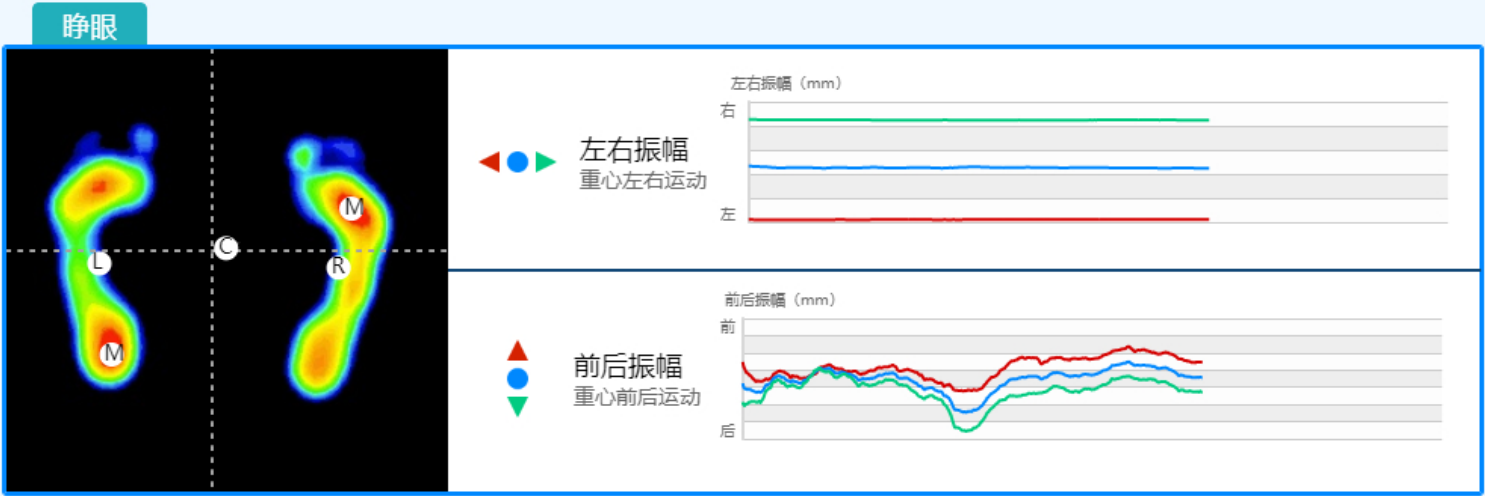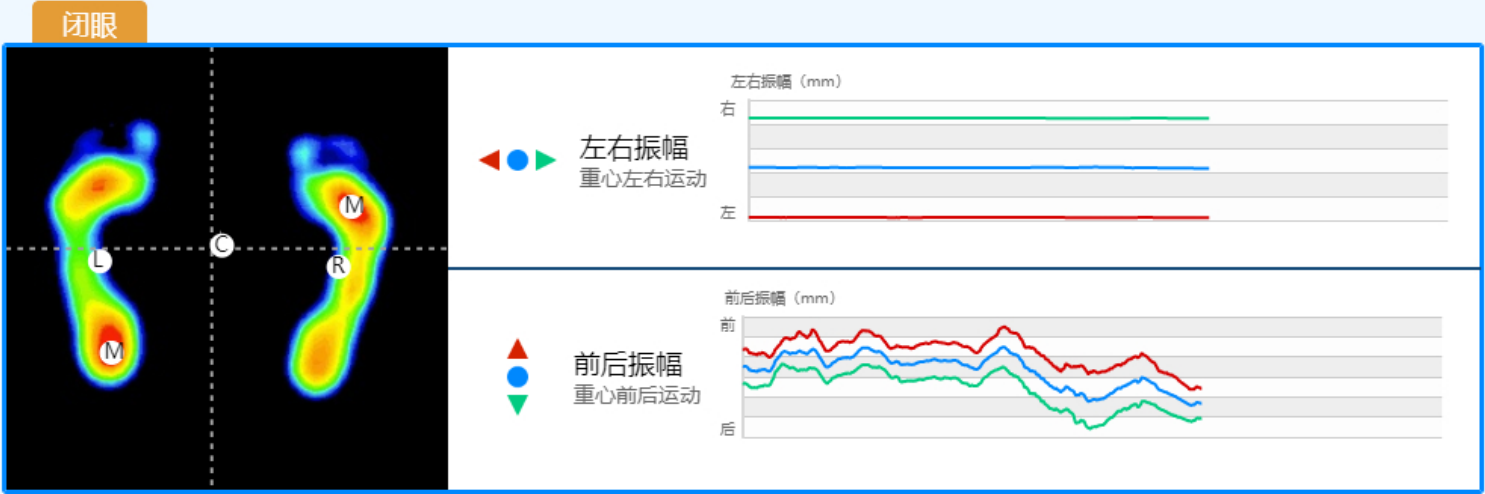

Cop数据

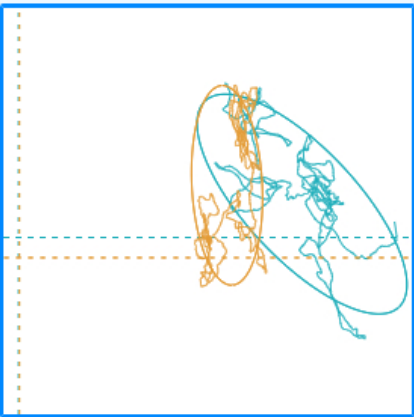

— 睁眼 — 闭眼

|             | 睁眼     | 闭眼    |
|-------------|--------|-------|
| 平均位置X【mm】   | 12.10  | 9.03  |
| 平均位置Y【mm】   | 2.13   | 2.80  |
| 标准差X【mm】    | 1.56   | 0.85  |
| 标准差Y【mm】    | 2.19   | 2.57  |
| 距离【mm】      | 91.24  | 71.92 |
| 平均速度【mm/ms】 | 0.00   | 0.00  |
| 距离/表面积      | 2.00   | 3.52  |
| 偏心率         | 0.92   | 0.94  |
| 倾斜角度【°】     | -43.01 | -2.97 |

# 平衡报告

王耀彬 22岁 男 62.0kg 170.0cm 2025-2-26 13:12:12

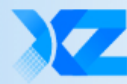

## 报告结论

睁眼  
前后晃动比左右晃动更明显  
闭眼  
前后晃动比左右晃动更明显
