# Supplementary material for: Individualized Corrective Training Based on Precision Biomechanical Assessment for the Prevention of Sports Injuries in Adolescents
Source: Research Square preprint supplement (doi:10.21203/rs.3.rs-8426574/v1), 2026-02-02
Supplement: Supplementary file 109 [file 平衡报告-薛培爽-20250226130347.pdf › Plantar pressure and gait analysis/jump rope/平衡报告-薛培爽-20250226130347.pdf]

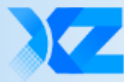

双脚重心变化

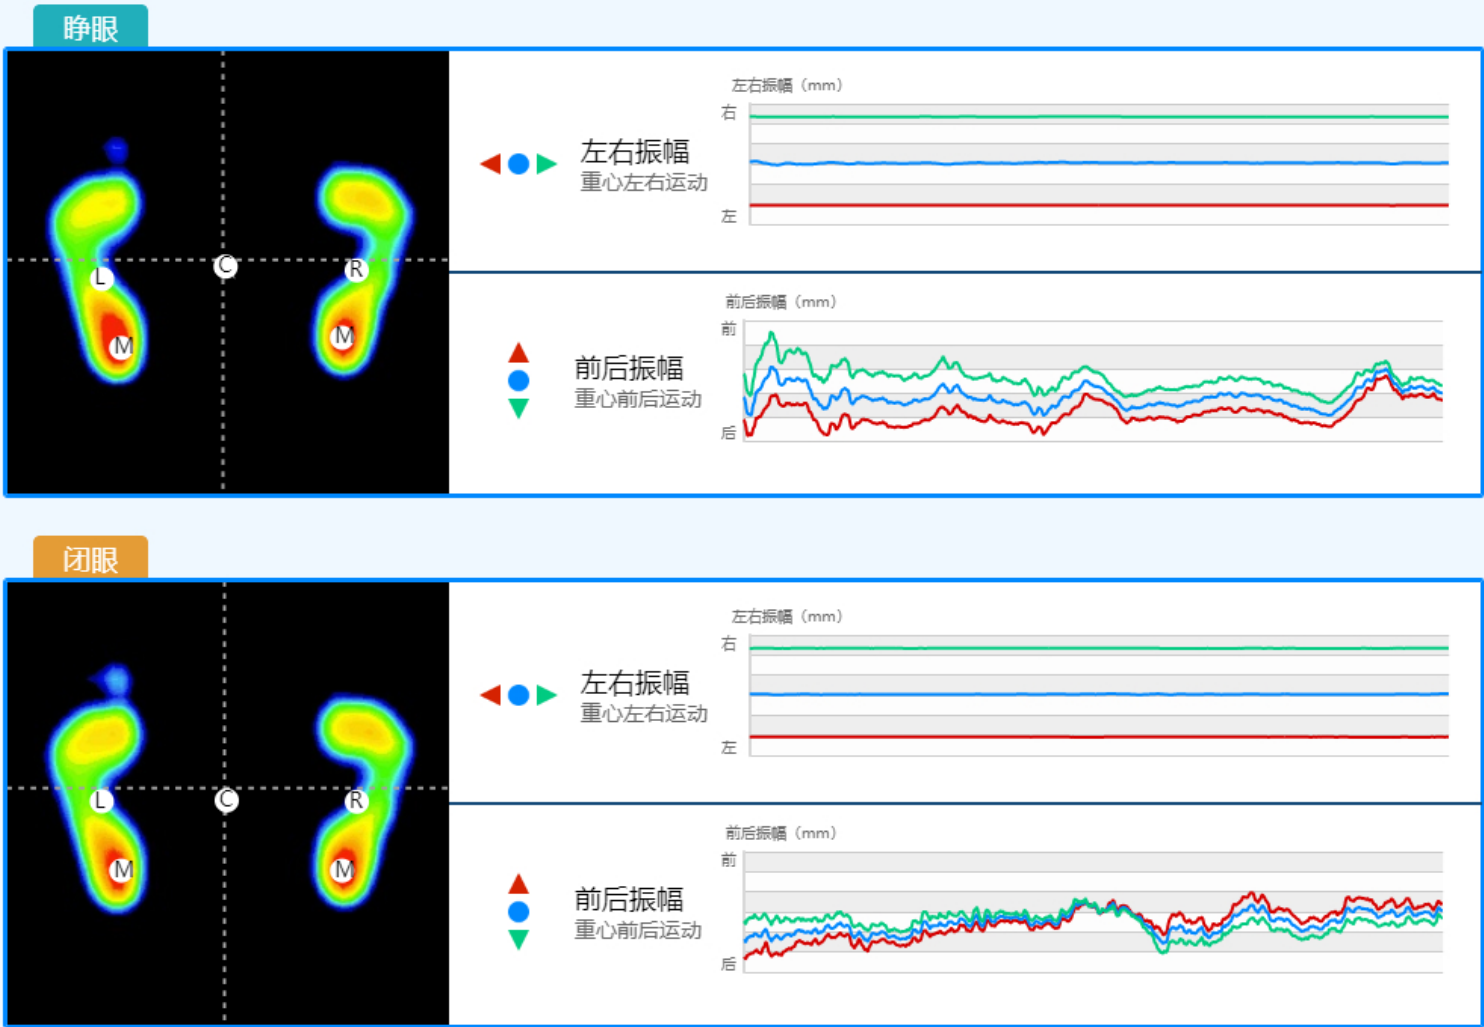

Cop数据

|             | 睁眼     | 闭眼     |
|-------------|--------|--------|
| 平均位置X【mm】   | 2.26   | 2.14   |
| 平均位置Y【mm】   | -5.86  | -10.64 |
| 标准差X【mm】    | 1.30   | 0.50   |
| 标准差Y【mm】    | 2.09   | 1.49   |
| 距离【mm】      | 166.56 | 126.34 |
| 平均速度【mm/ms】 | 0.01   | 0.00   |
| 距离/表面积      | 3.40   | 9.51   |
| 偏心率         | 0.94   | 0.92   |
| 倾斜角度【°】     | -34.27 | -83.76 |

平衡报告

薛培爽 22岁 男 66.0kg 160.0cm 2025-2-26 13:02:40

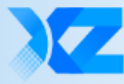

报告结论

睁眼  
前后晃动比左右晃动更明显  
闭眼  
前后晃动比左右晃动更明显
