# Supplementary material for: Individualized Corrective Training Based on Precision Biomechanical Assessment for the Prevention of Sports Injuries in Adolescents
Source: Research Square preprint supplement (doi:10.21203/rs.3.rs-8426574/v1), 2026-02-02
Supplement: Supplementary file 110 [file 平衡报告-薛培爽-20250226130505.pdf › Plantar pressure and gait analysis/jump rope/平衡报告-薛培爽-20250226130505.pdf]

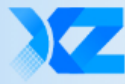

双脚重心变化

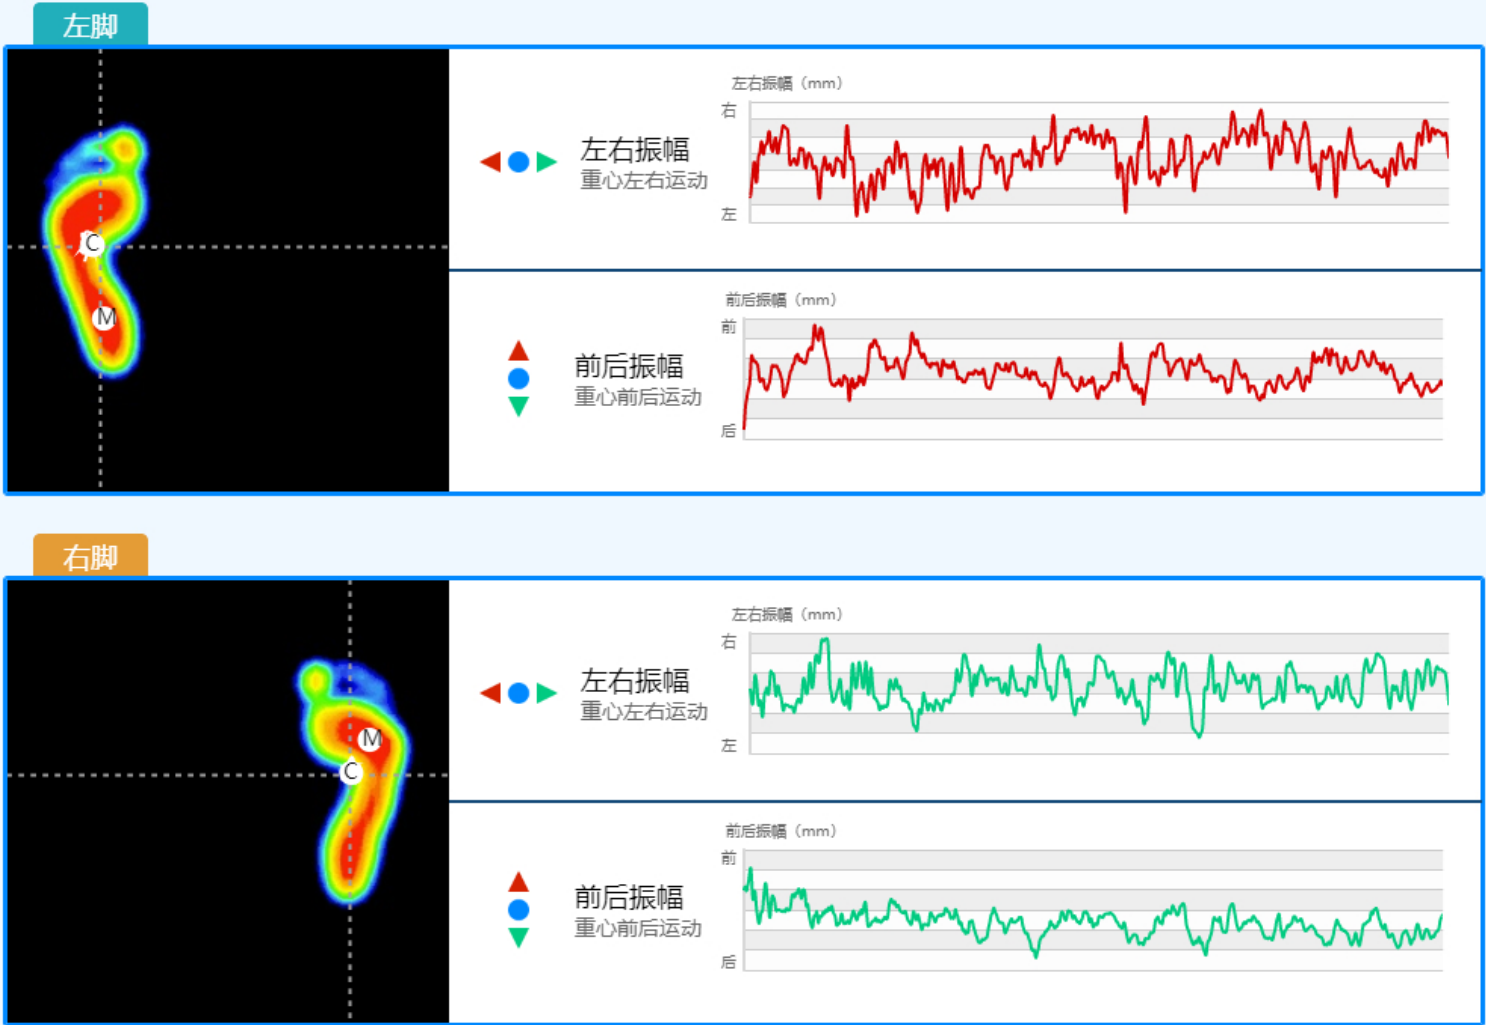

Cop数据

|  | 左脚          | 右脚     |
|--|-------------|--------|
|  | 平均位置X【mm】   | 0.95   |
|  | 平均位置Y【mm】   | 1.79   |
|  | 标准差X【mm】    | 2.57   |
|  | 标准差Y【mm】    | 3.29   |
|  | 距离【mm】      | 720.36 |
|  | 平均速度【mm/ms】 | 0.02   |
|  | 距离/表面积      | 3.14   |
|  | 偏心率         | 0.73   |
|  | 倾斜角度【°】     | -73.64 |

平衡报告

薛培爽 22岁 男 66.0kg 160.0cm 2025-2-26 13:03:57

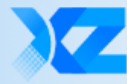

报告结论

睁眼  
前后晃动比左右晃动更明显
