# Supplementary material for: Individualized Corrective Training Based on Precision Biomechanical Assessment for the Prevention of Sports Injuries in Adolescents
Source: Research Square preprint supplement (doi:10.21203/rs.3.rs-8426574/v1), 2026-02-02
Supplement: Supplementary file 112 [file 平衡报告-闫静雯-20250226125359.pdf › Plantar pressure and gait analysis/jump rope/平衡报告-闫静雯-20250226125359.pdf]

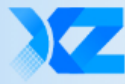

双脚重心变化

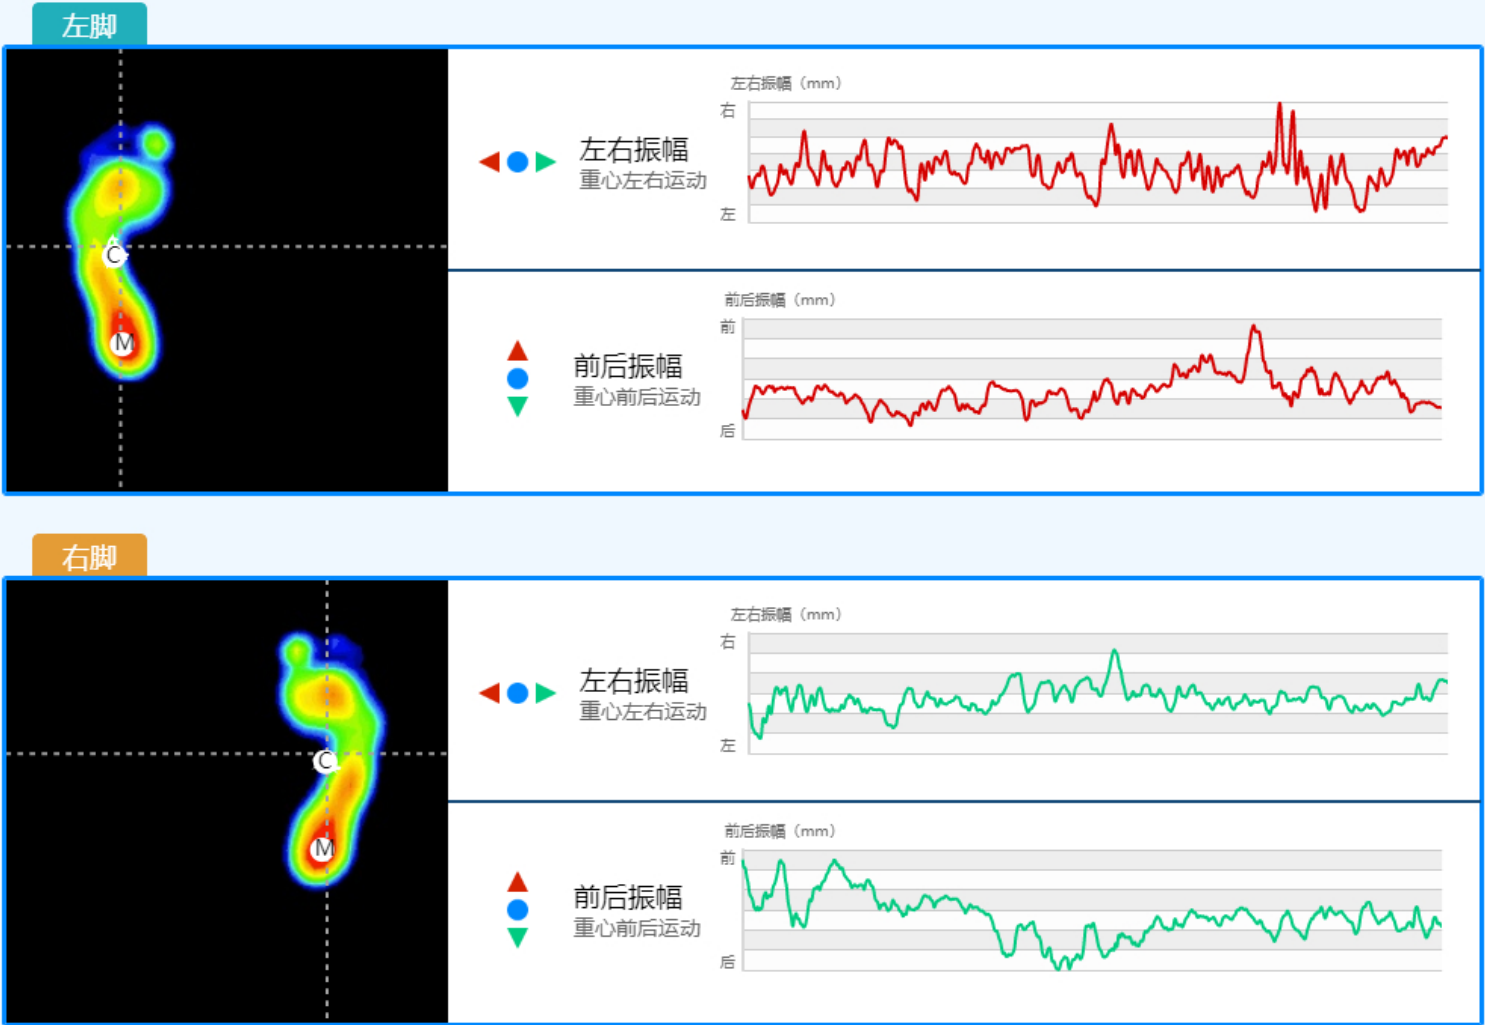

Cop数据

| <div>左脚 右脚</div> | 左脚          | 右脚           |
|------------------|-------------|--------------|
|                  | 平均位置X【mm】   | -5.70-1.44   |
|                  | 平均位置Y【mm】   | -8.29-7.13   |
|                  | 标准差X【mm】    | 3.003.00     |
|                  | 标准差Y【mm】    | 3.963.24     |
|                  | 距离【mm】      | 606.92415.47 |
|                  | 平均速度【mm/ms】 | 0.020.01     |
|                  | 距离/表面积      | 1.871.78     |
|                  | 偏心率         | 0.420.71     |
|                  | 倾斜角度【°】     | -36.72-34.11 |



# 平衡报告

闫静雯 19岁 女 52.0kg 162.0cm 2025-2-26 12:52:51

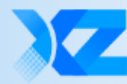

## 报告结论

睁眼  
前后晃动比左右晃动更明显
