# Supplementary material for: Individualized Corrective Training Based on Precision Biomechanical Assessment for the Prevention of Sports Injuries in Adolescents
Source: Research Square preprint supplement (doi:10.21203/rs.3.rs-8426574/v1), 2026-02-02
Supplement: Supplementary file 113 [file 平衡报告-龚泳霖-20250226165628.pdf › Plantar pressure and gait analysis/jump rope/平衡报告-龚泳霖-20250226165628.pdf]

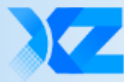

双脚重心变化

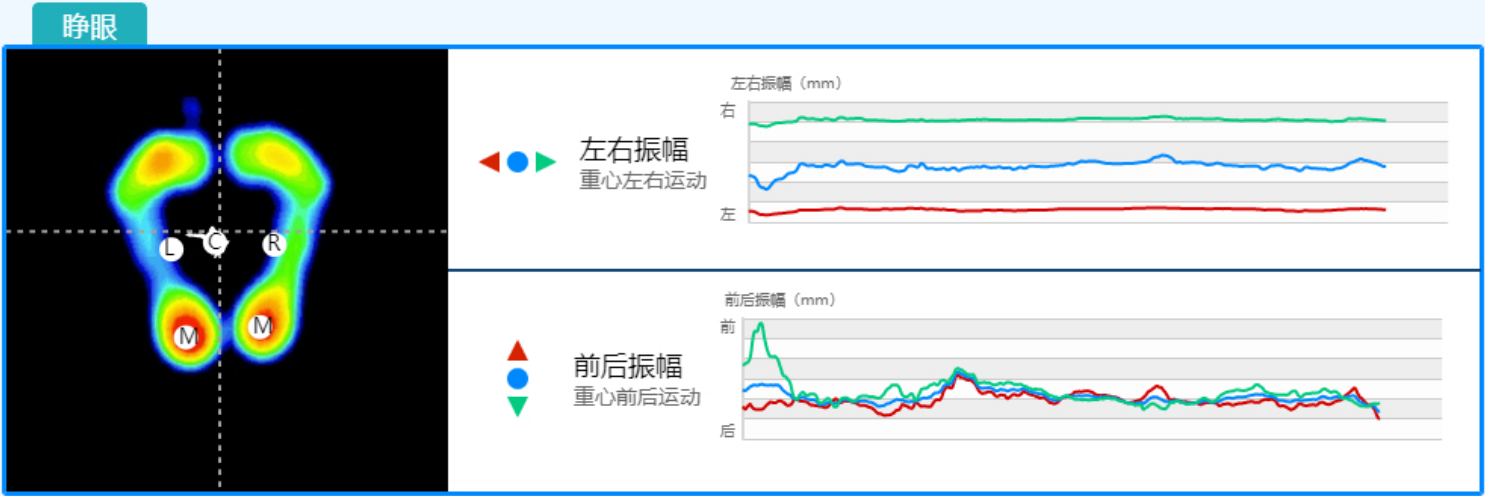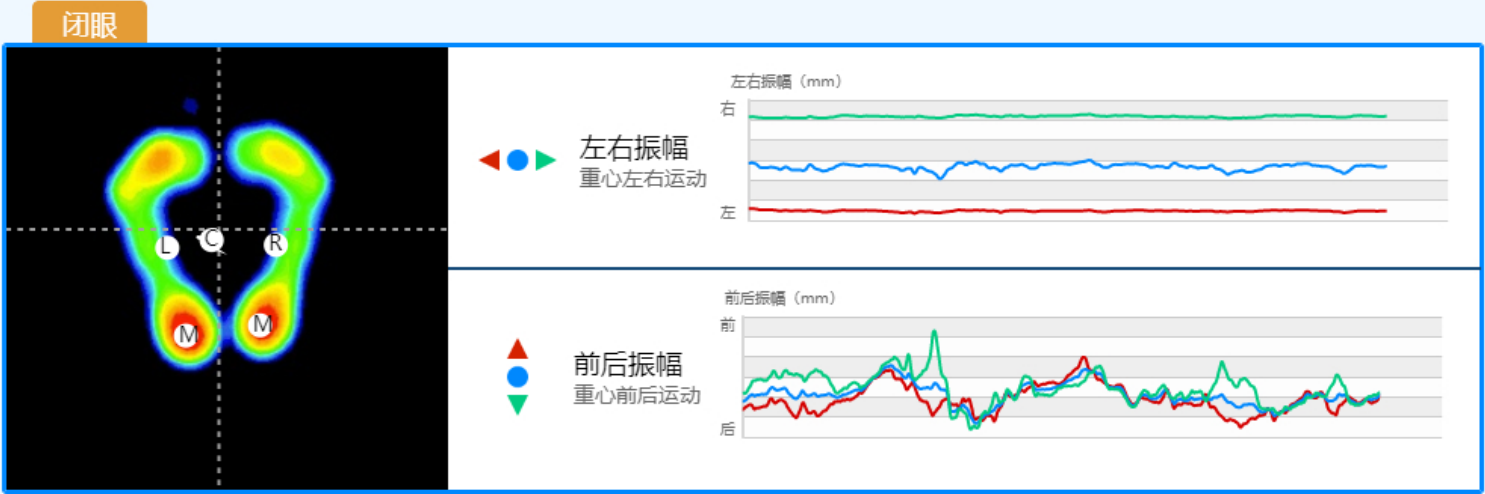

Cop数据

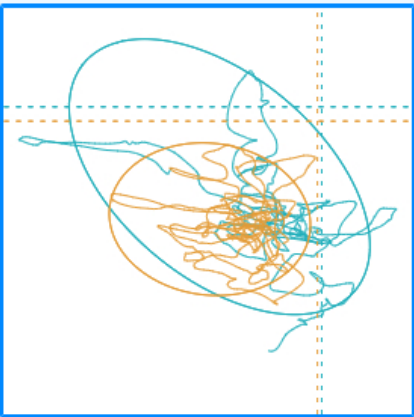

— 睁眼 — 闭眼

|             | 睁眼     | 闭眼     |
|-------------|--------|--------|
| 平均位置X【mm】   | -4.18  | -6.52  |
| 平均位置Y【mm】   | -9.77  | -9.32  |
| 标准差X【mm】    | 4.98   | 2.96   |
| 标准差Y【mm】    | 4.09   | 2.73   |
| 距离【mm】      | 265.36 | 285.29 |
| 平均速度【mm/ms】 | 0.01   | 0.01   |
| 距离/表面积      | 0.58   | 1.46   |
| 偏心率         | 0.82   | 0.66   |
| 倾斜角度【°】     | -49.70 | -82.53 |

平衡报告

龚泳霖 18岁 男 70.0kg 177.0cm 2025-2-26 16:55:22

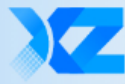

报告结论

睁眼  
左右晃动比前后晃动更明显  
闭眼  
左右晃动比前后晃动更明显
