# Supplementary material for: Individualized Corrective Training Based on Precision Biomechanical Assessment for the Prevention of Sports Injuries in Adolescents
Source: Research Square preprint supplement (doi:10.21203/rs.3.rs-8426574/v1), 2026-02-02
Supplement: Supplementary file 114 [file 平衡报告-龚泳霖-20250226165740.pdf › Plantar pressure and gait analysis/jump rope/平衡报告-龚泳霖-20250226165740.pdf]

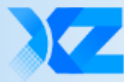

双脚重心变化

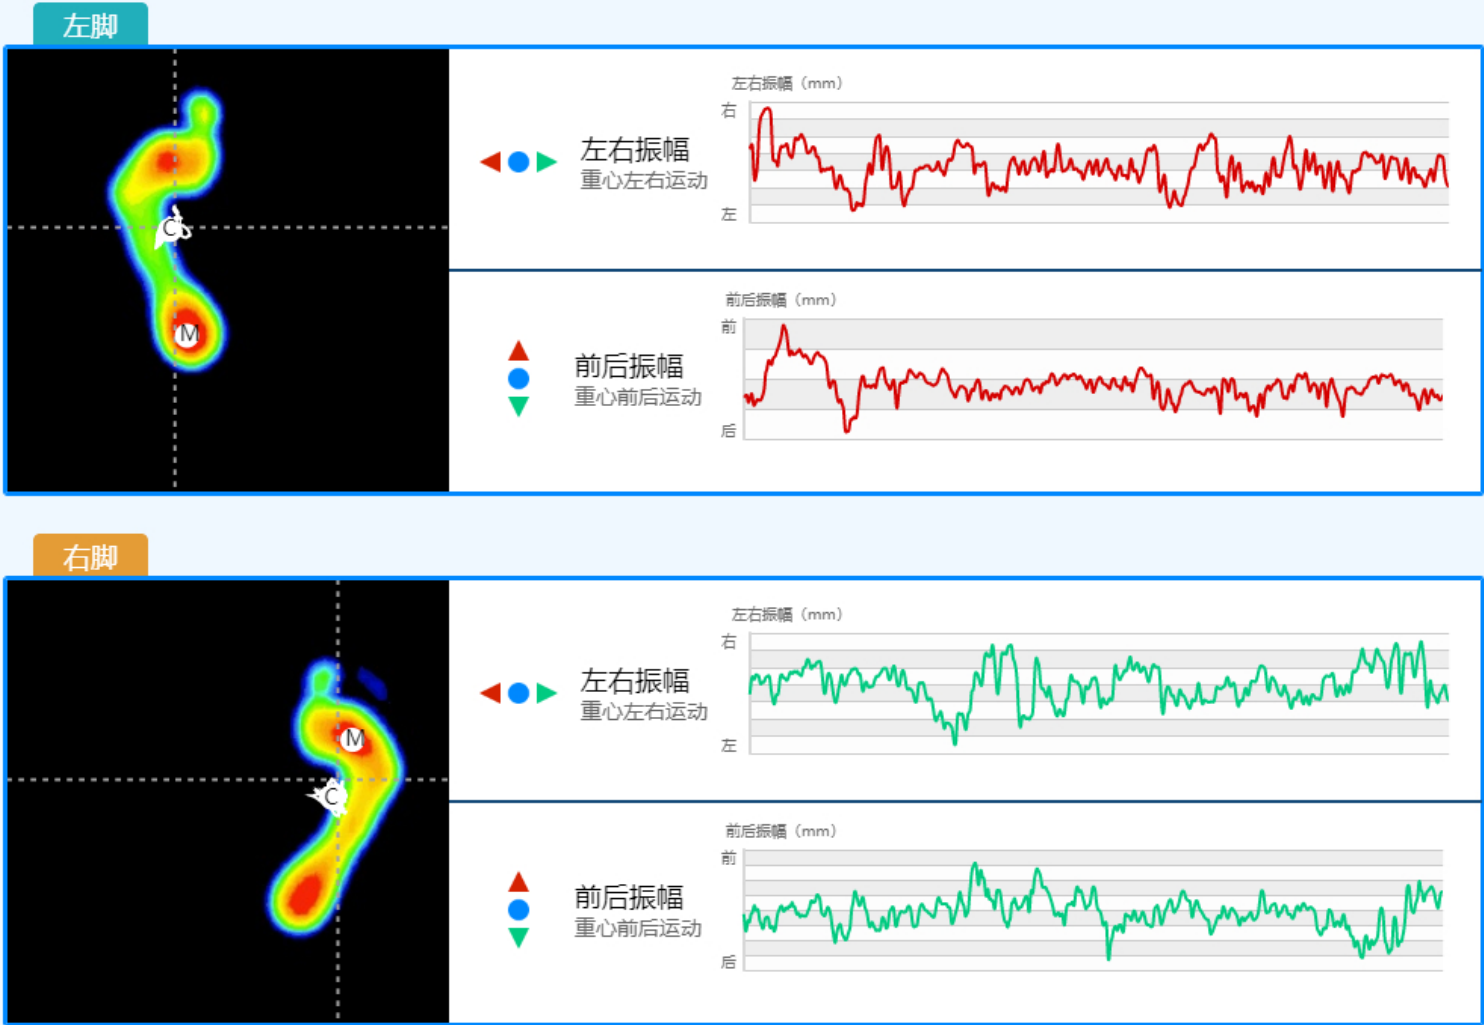

Cop数据

左脚 右脚

|             | 左脚     | 右脚      |
|-------------|--------|---------|
| 平均位置X【mm】   | -4.29  | -5.04   |
| 平均位置Y【mm】   | -2.24  | -15.92  |
| 标准差X【mm】    | 5.04   | 5.28    |
| 标准差Y【mm】    | 4.82   | 5.17    |
| 距离【mm】      | 993.44 | 1109.32 |
| 平均速度【mm/ms】 | 0.03   | 0.04    |
| 距离/表面积      | 1.39   | 1.67    |
| 偏心率         | 0.46   | 0.57    |
| 倾斜角度【°】     | -29.57 | -50.63  |

# 平衡报告

龚泳霖 18岁 男 70.0kg 177.0cm 2025-2-26 16:56:34

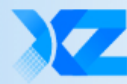

## 报告结论

睁眼  
左右振幅大于参考值  
前后振幅大于参考值  
左右晃动比前后晃动更明显
