# Supplementary material for: Individualized Corrective Training Based on Precision Biomechanical Assessment for the Prevention of Sports Injuries in Adolescents
Source: Research Square preprint supplement (doi:10.21203/rs.3.rs-8426574/v1), 2026-02-02
Supplement: Supplementary file 117 [file 静态报告-张文茹-20250226124924.pdf › Plantar pressure and gait analysis/jump rope/静态报告-张文茹-20250226124924.pdf]

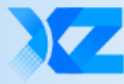

静态双脚数据

左脚

|            |      |
|------------|------|
| 面积【mm²】    | 6230 |
| 前/双足【%】    | 20   |
| 前/全足【%】    | 41   |
| 最大压强【gr/%】 | 159  |
| 平均压强【gr/%】 | 138  |

|            |      |
|------------|------|
| 面积【mm²】    | 4346 |
| 后/双足【%】    | 30   |
| 后/全足【%】    | 59   |
| 最大压强【gr/%】 | 324  |
| 平均压强【gr/%】 | 294  |

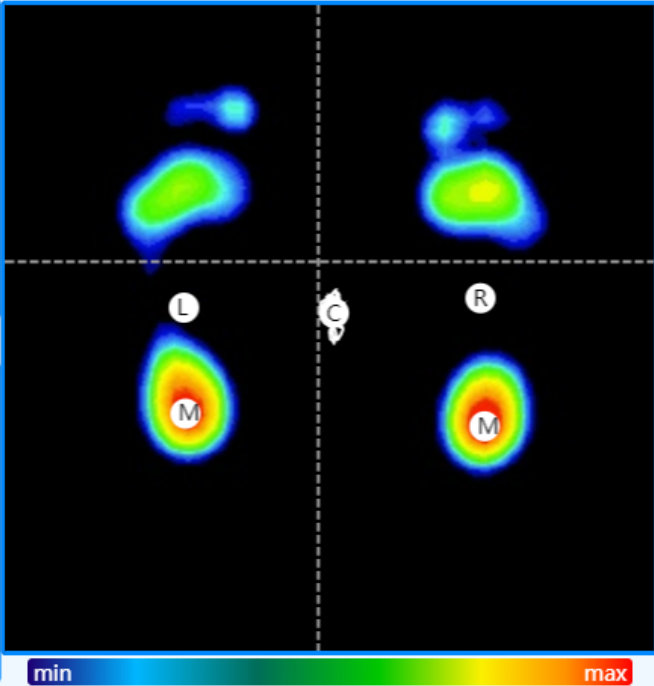

右脚

|            |      |
|------------|------|
| 面积【mm²】    | 5741 |
| 前/双足【%】    | 22   |
| 前/全足【%】    | 44   |
| 最大压强【gr/%】 | 194  |
| 平均压强【gr/%】 | 166  |

|            |      |
|------------|------|
| 面积【mm²】    | 3927 |
| 后/双足【%】    | 28   |
| 后/全足【%】    | 56   |
| 最大压强【gr/%】 | 323  |
| 平均压强【gr/%】 | 306  |

双脚综合数据

左脚总和

|            |       |
|------------|-------|
| 面积【mm²】    | 10576 |
| 负荷【%】      | 50    |
| 最大压强【gr/%】 | 223   |
| 平均压强【gr/%】 | 203   |

右脚总和

|            |      |
|------------|------|
| 面积【mm²】    | 9668 |
| 负荷【%】      | 50   |
| 最大压强【gr/%】 | 237  |
| 平均压强【gr/%】 | 223  |

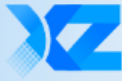

足弓类型

左脚

足弓指数 15.00%

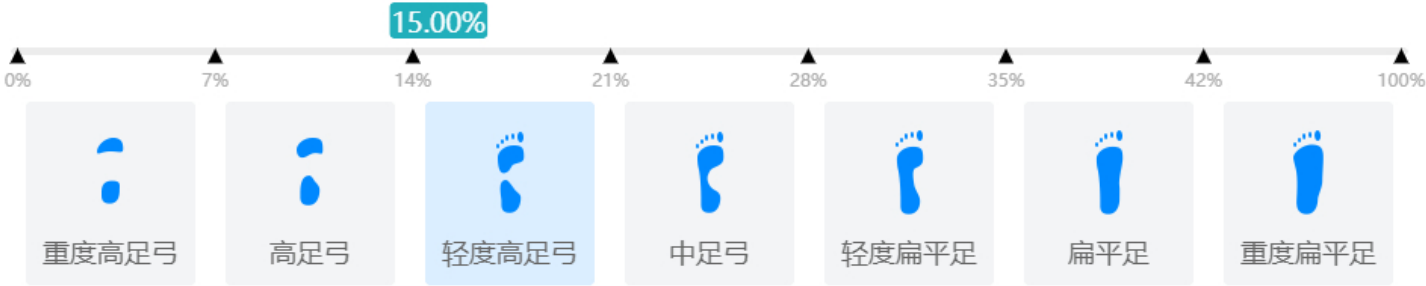

右脚

足弓指数 4.00%

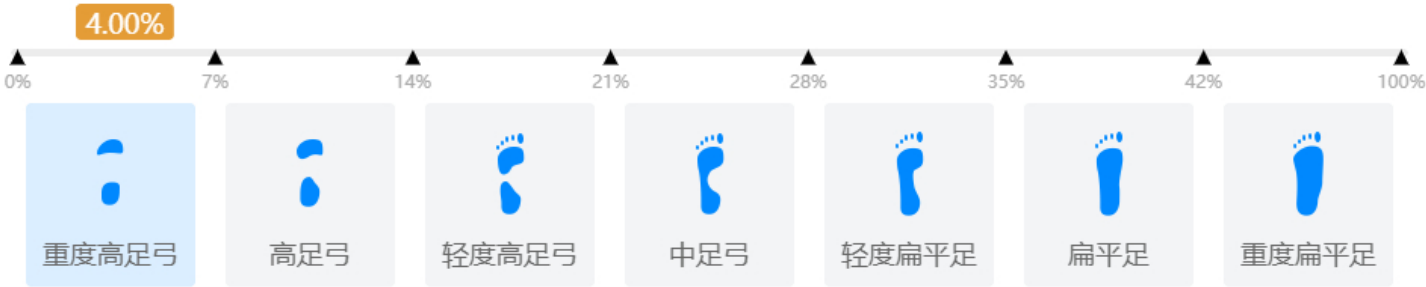

报告结论

左脚横弓塌陷  
左脚足弓偏高  
右脚横弓塌陷  
右脚足弓过高  
身体重心过度靠后  
左右侧足弓形状压力差异较大
