# Supplementary material for: Individualized Corrective Training Based on Precision Biomechanical Assessment for the Prevention of Sports Injuries in Adolescents
Source: Research Square preprint supplement (doi:10.21203/rs.3.rs-8426574/v1), 2026-02-02
Supplement: Supplementary file 119 [file 静态报告-张译丹-20250226164405.pdf › Plantar pressure and gait analysis/jump rope/静态报告-张译丹-20250226164405.pdf]

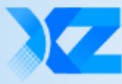

静态双脚数据

左脚

|            |      |
|------------|------|
| 面积【mm²】    | 5365 |
| 前/双足【%】    | 24   |
| 前/全足【%】    | 51   |
| 最大压强【gr/%】 | 225  |
| 平均压强【gr/%】 | 205  |

|            |      |
|------------|------|
| 面积【mm²】    | 4661 |
| 后/双足【%】    | 24   |
| 后/全足【%】    | 49   |
| 最大压强【gr/%】 | 258  |
| 平均压强【gr/%】 | 231  |

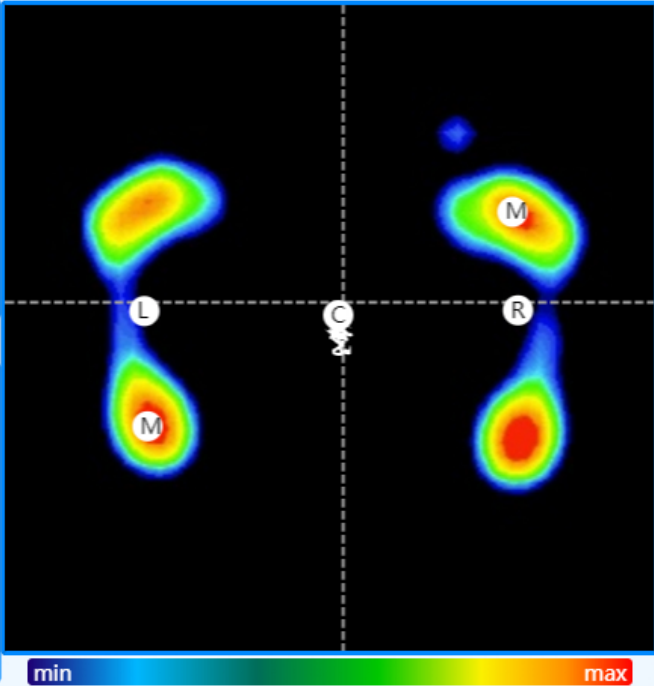

右脚

|            |      |
|------------|------|
| 面积【mm²】    | 6339 |
| 前/双足【%】    | 27   |
| 前/全足【%】    | 52   |
| 最大压强【gr/%】 | 201  |
| 平均压强【gr/%】 | 193  |

|            |      |
|------------|------|
| 面积【mm²】    | 4796 |
| 后/双足【%】    | 25   |
| 后/全足【%】    | 48   |
| 最大压强【gr/%】 | 265  |
| 平均压强【gr/%】 | 232  |

双脚综合数据

左脚总和

|            |       |
|------------|-------|
| 面积【mm²】    | 10026 |
| 负荷【%】      | 48    |
| 最大压强【gr/%】 | 223   |
| 平均压强【gr/%】 | 217   |

右脚总和

|            |       |
|------------|-------|
| 面积【mm²】    | 11135 |
| 负荷【%】      | 52    |
| 最大压强【gr/%】 | 223   |
| 平均压强【gr/%】 | 210   |

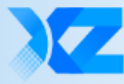

足弓类型

左脚

足弓指数 21.00%

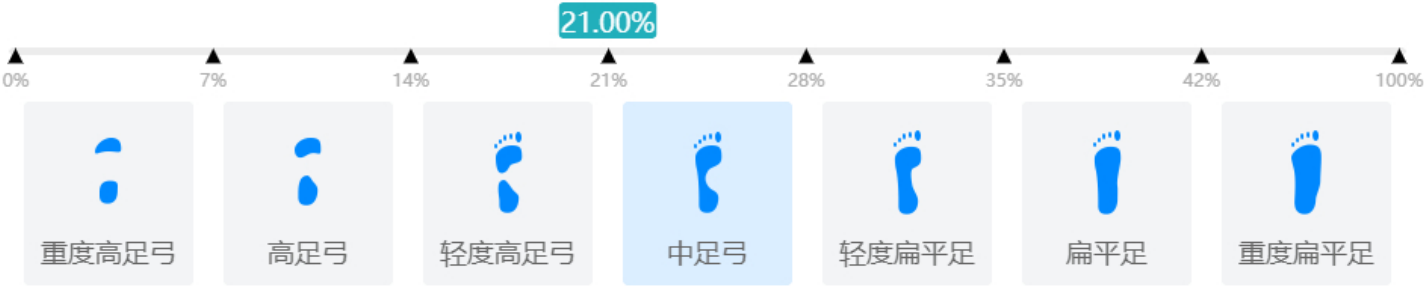

右脚

足弓指数 17.00%

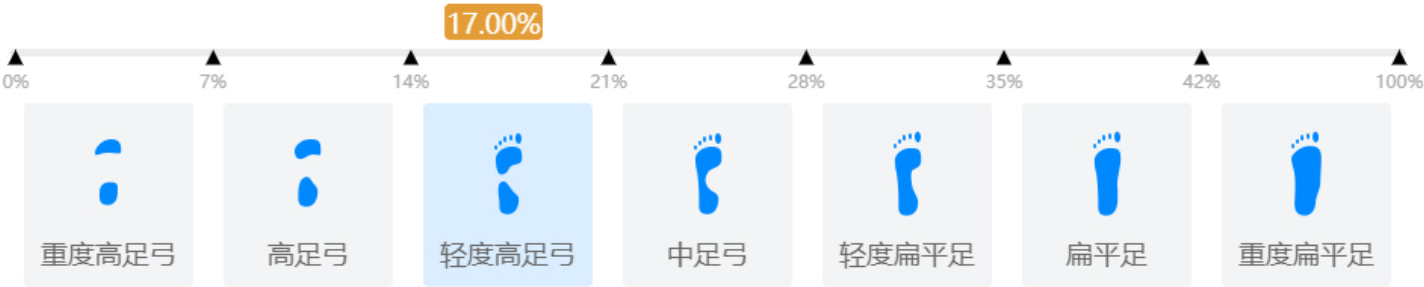

报告结论

左脚横弓塌陷  
右脚横弓塌陷  
右脚足弓偏高  
身体重心过度靠后
