# Supplementary material for: Individualized Corrective Training Based on Precision Biomechanical Assessment for the Prevention of Sports Injuries in Adolescents
Source: Research Square preprint supplement (doi:10.21203/rs.3.rs-8426574/v1), 2026-02-02
Supplement: Supplementary file 120 [file 静态报告-杨帆-20250226131026.pdf › Plantar pressure and gait analysis/jump rope/静态报告-杨帆-20250226131026.pdf]

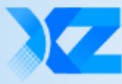

静态双脚数据

左脚

|            |      |
|------------|------|
| 面积【mm²】    | 7674 |
| 前/双足【%】    | 28   |
| 前/全足【%】    | 57   |
| 最大压强【gr/%】 | 274  |
| 平均压强【gr/%】 | 264  |

|            |      |
|------------|------|
| 面积【mm²】    | 6805 |
| 后/双足【%】    | 21   |
| 后/全足【%】    | 43   |
| 最大压强【gr/%】 | 249  |
| 平均压强【gr/%】 | 227  |

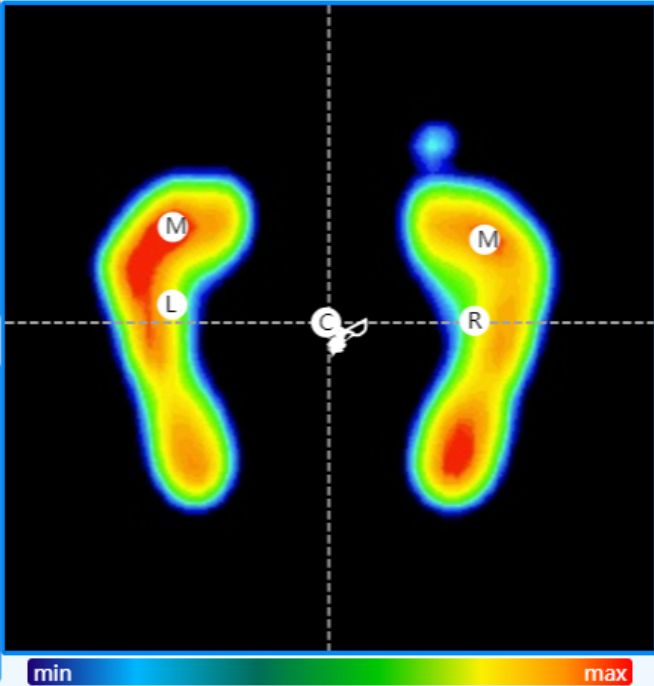

右脚

|            |      |
|------------|------|
| 面积【mm²】    | 9126 |
| 前/双足【%】    | 27   |
| 前/全足【%】    | 53   |
| 最大压强【gr/%】 | 238  |
| 平均压强【gr/%】 | 217  |

|            |      |
|------------|------|
| 面积【mm²】    | 7139 |
| 后/双足【%】    | 24   |
| 后/全足【%】    | 47   |
| 最大压强【gr/%】 | 268  |
| 平均压强【gr/%】 | 245  |

双脚综合数据

左脚总和

|            |       |
|------------|-------|
| 面积【mm²】    | 14479 |
| 负荷【%】      | 49    |
| 最大压强【gr/%】 | 257   |
| 平均压强【gr/%】 | 247   |

右脚总和

|            |       |
|------------|-------|
| 面积【mm²】    | 16265 |
| 负荷【%】      | 51    |
| 最大压强【gr/%】 | 242   |
| 平均压强【gr/%】 | 230   |



足弓类型

左脚

足弓指数 29.00%

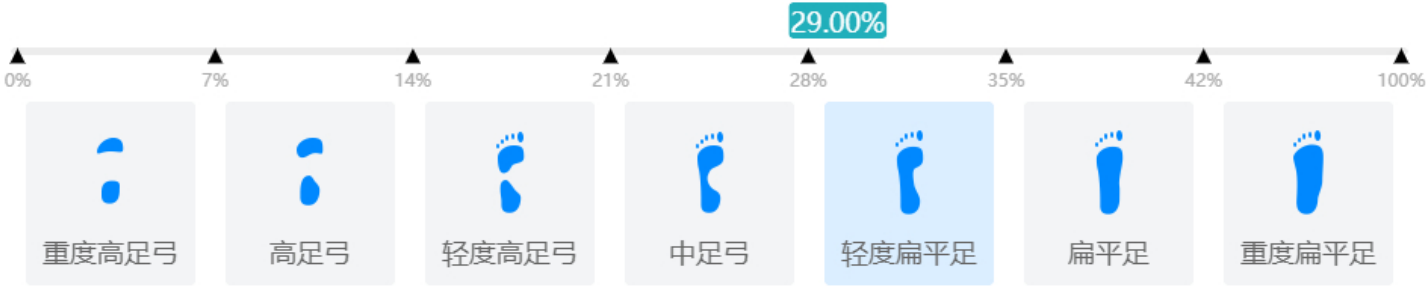

右脚

足弓指数 29.00%

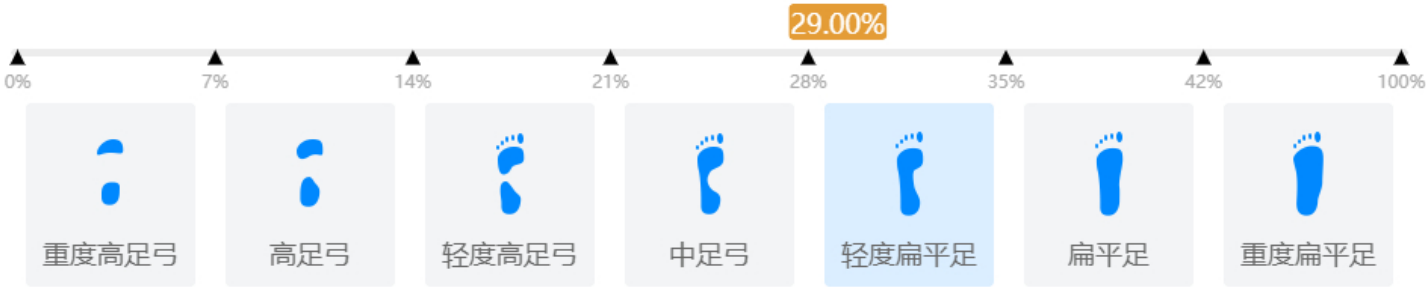

报告结论

左脚横弓塌陷  
左脚足弓偏低  
右脚横弓塌陷  
右脚足弓偏低  
身体重心过度靠后
