# Supplementary material for: Individualized Corrective Training Based on Precision Biomechanical Assessment for the Prevention of Sports Injuries in Adolescents
Source: Research Square preprint supplement (doi:10.21203/rs.3.rs-8426574/v1), 2026-02-02
Supplement: Supplementary file 121 [file 静态报告-杨雯杰-20250226134934.pdf › Plantar pressure and gait analysis/jump rope/静态报告-杨雯杰-20250226134934.pdf]

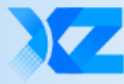

静态双脚数据

左脚

|            |      |
|------------|------|
| 面积【mm²】    | 6911 |
| 前/双足【%】    | 21   |
| 前/全足【%】    | 43   |
| 最大压强【gr/%】 | 190  |
| 平均压强【gr/%】 | 152  |

|            |      |
|------------|------|
| 面积【mm²】    | 4958 |
| 后/双足【%】    | 28   |
| 后/全足【%】    | 57   |
| 最大压强【gr/%】 | 294  |
| 平均压强【gr/%】 | 279  |

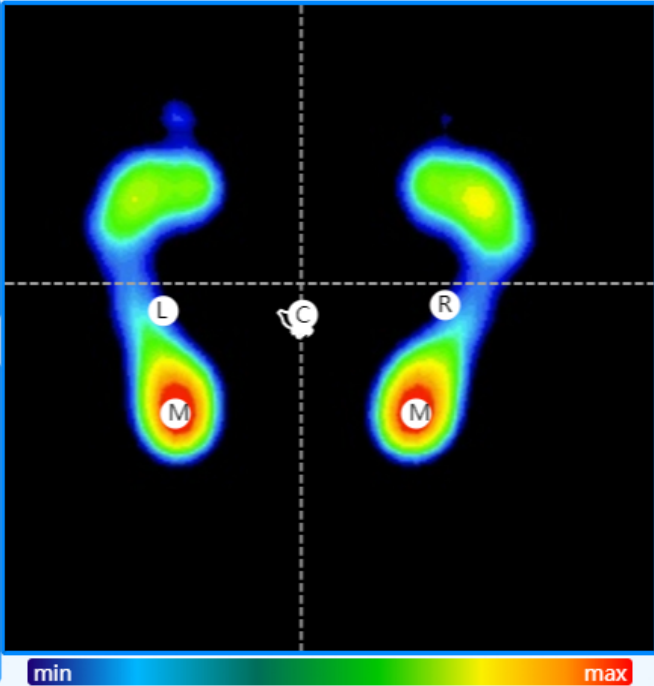

右脚

|            |      |
|------------|------|
| 面积【mm²】    | 6809 |
| 前/双足【%】    | 22   |
| 前/全足【%】    | 44   |
| 最大压强【gr/%】 | 185  |
| 平均压强【gr/%】 | 160  |

|            |      |
|------------|------|
| 面积【mm²】    | 4947 |
| 后/双足【%】    | 28   |
| 后/全足【%】    | 56   |
| 最大压强【gr/%】 | 303  |
| 平均压强【gr/%】 | 280  |

双脚综合数据

左脚总和

|            |       |
|------------|-------|
| 面积【mm²】    | 11869 |
| 负荷【%】      | 50    |
| 最大压强【gr/%】 | 230   |
| 平均压强【gr/%】 | 205   |

右脚总和

|            |       |
|------------|-------|
| 面积【mm²】    | 11756 |
| 负荷【%】      | 50    |
| 最大压强【gr/%】 | 225   |
| 平均压强【gr/%】 | 211   |

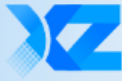

足弓类型

左脚

足弓指数 23.00%

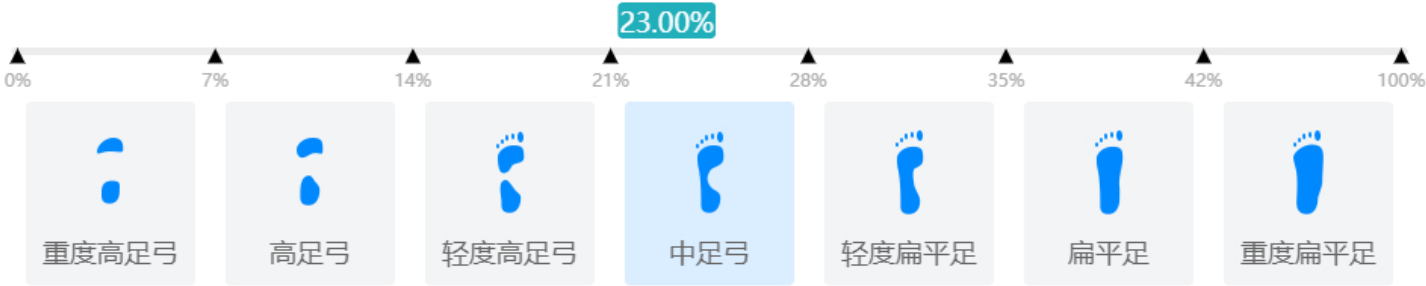

右脚

足弓指数 23.00%

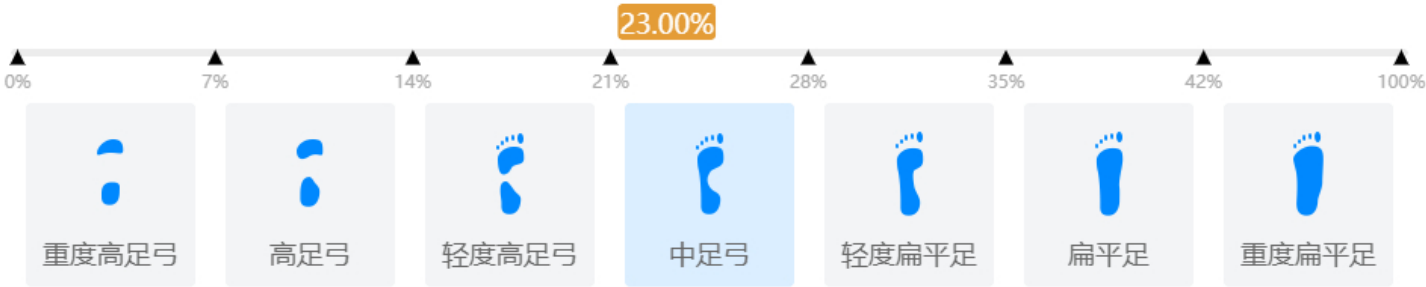

报告结论

左脚横弓塌陷  
右脚横弓塌陷  
身体重心过度靠后
