# Supplementary material for: Individualized Corrective Training Based on Precision Biomechanical Assessment for the Prevention of Sports Injuries in Adolescents
Source: Research Square preprint supplement (doi:10.21203/rs.3.rs-8426574/v1), 2026-02-02
Supplement: Supplementary file 122 [file 静态报告-毋梦鑫-20250226164835.pdf › Plantar pressure and gait analysis/jump rope/静态报告-毋梦鑫-20250226164835.pdf]

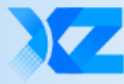

静态双脚数据

左脚

|            |      |
|------------|------|
| 面积【mm²】    | 6712 |
| 前/双足【%】    | 23   |
| 前/全足【%】    | 45   |
| 最大压强【gr/%】 | 213  |
| 平均压强【gr/%】 | 186  |

|            |      |
|------------|------|
| 面积【mm²】    | 5382 |
| 后/双足【%】    | 28   |
| 后/全足【%】    | 55   |
| 最大压强【gr/%】 | 289  |
| 平均压强【gr/%】 | 281  |

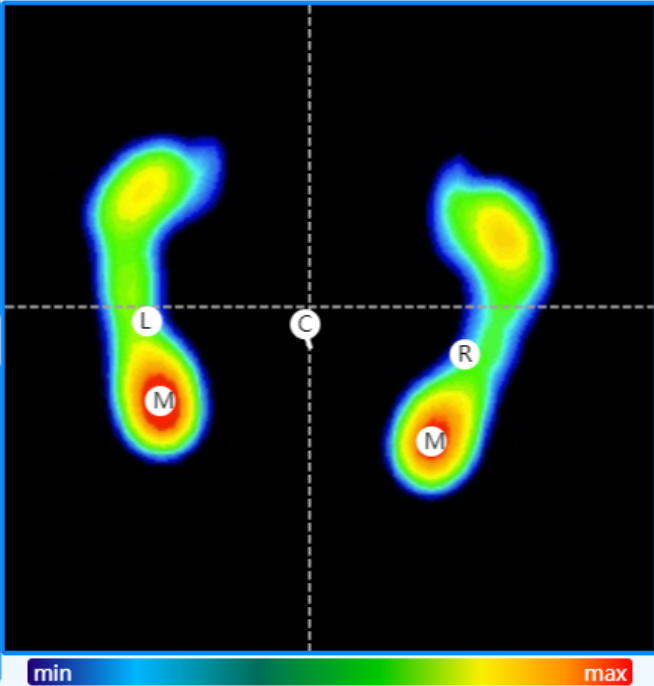

右脚

|            |      |
|------------|------|
| 面积【mm²】    | 6870 |
| 前/双足【%】    | 23   |
| 前/全足【%】    | 48   |
| 最大压强【gr/%】 | 205  |
| 平均压强【gr/%】 | 185  |

|            |      |
|------------|------|
| 面积【mm²】    | 5554 |
| 后/双足【%】    | 26   |
| 后/全足【%】    | 52   |
| 最大压强【gr/%】 | 273  |
| 平均压强【gr/%】 | 252  |

双脚综合数据

左脚总和

|            |       |
|------------|-------|
| 面积【mm²】    | 12094 |
| 负荷【%】      | 51    |
| 最大压强【gr/%】 | 232   |
| 平均压强【gr/%】 | 228   |

右脚总和

|            |       |
|------------|-------|
| 面积【mm²】    | 12424 |
| 负荷【%】      | 49    |
| 最大压强【gr/%】 | 221   |
| 平均压强【gr/%】 | 215   |

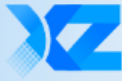

足弓类型

左脚

足弓指数 28.00%

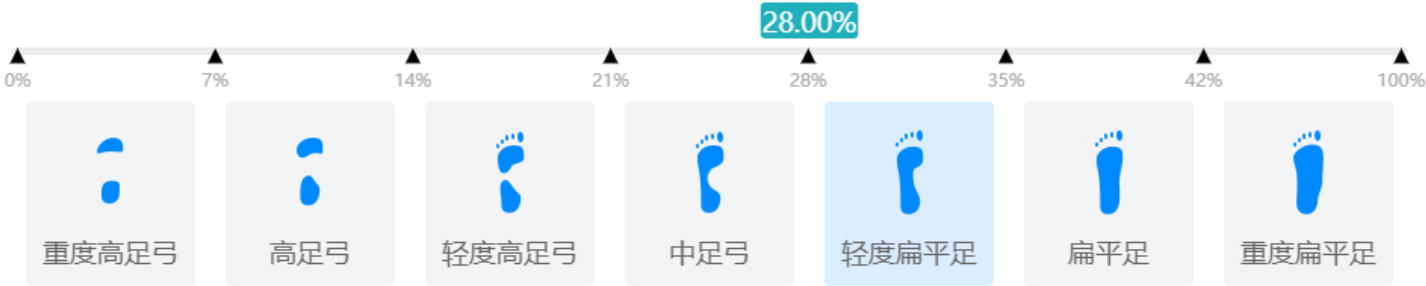

右脚

足弓指数 26.00%

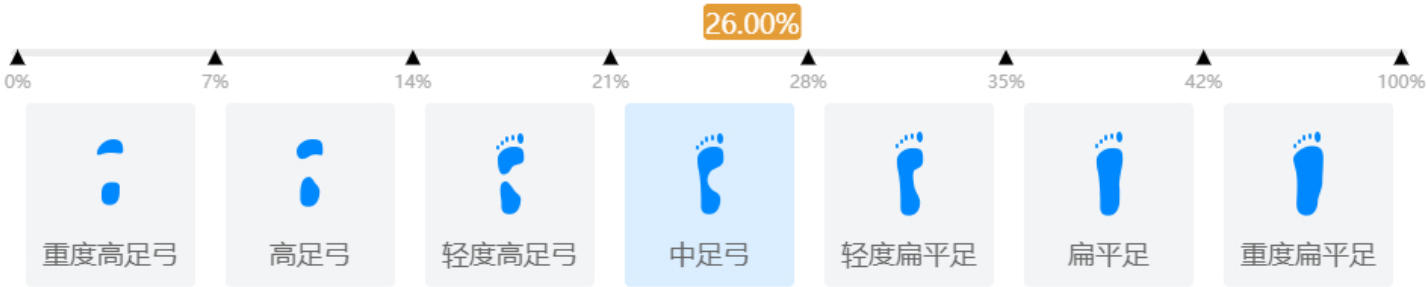

报告结论

左脚横弓塌陷  
右脚横弓塌陷  
身体重心过度靠后
