# Supplementary material for: Individualized Corrective Training Based on Precision Biomechanical Assessment for the Prevention of Sports Injuries in Adolescents
Source: Research Square preprint supplement (doi:10.21203/rs.3.rs-8426574/v1), 2026-02-02
Supplement: Supplementary file 123 [file 静态报告-王淑欣-20250226130037.pdf › Plantar pressure and gait analysis/jump rope/静态报告-王淑欣-20250226130037.pdf]

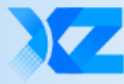

静态双脚数据

左脚

|            |      |
|------------|------|
| 面积【mm²】    | 6030 |
| 前/双足【%】    | 22   |
| 前/全足【%】    | 46   |
| 最大压强【gr/%】 | 173  |
| 平均压强【gr/%】 | 164  |

|            |      |
|------------|------|
| 面积【mm²】    | 4694 |
| 后/双足【%】    | 25   |
| 后/全足【%】    | 54   |
| 最大压强【gr/%】 | 246  |
| 平均压强【gr/%】 | 242  |

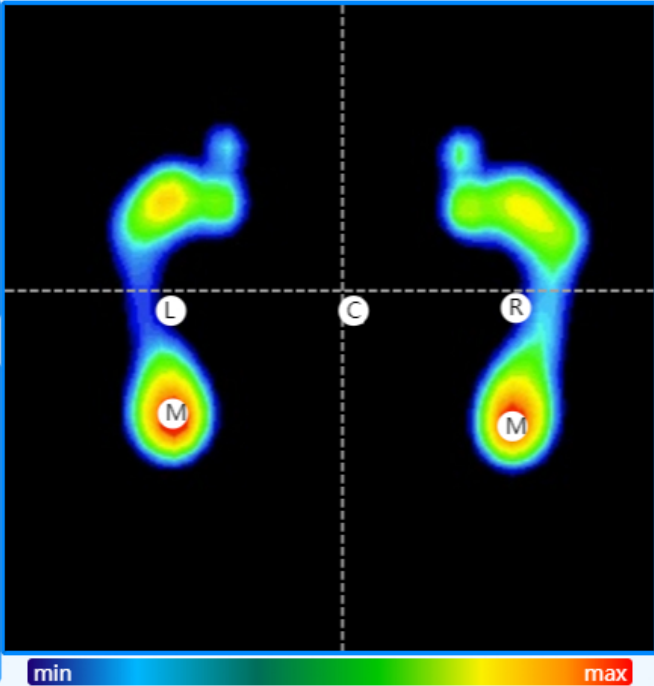

右脚

|            |      |
|------------|------|
| 面积【mm²】    | 6576 |
| 前/双足【%】    | 26   |
| 前/全足【%】    | 50   |
| 最大压强【gr/%】 | 188  |
| 平均压强【gr/%】 | 179  |

|            |      |
|------------|------|
| 面积【mm²】    | 4954 |
| 后/双足【%】    | 27   |
| 后/全足【%】    | 50   |
| 最大压强【gr/%】 | 255  |
| 平均压强【gr/%】 | 242  |

双脚综合数据

左脚总和

|            |       |
|------------|-------|
| 面积【mm²】    | 10725 |
| 负荷【%】      | 47    |
| 最大压强【gr/%】 | 202   |
| 平均压强【gr/%】 | 198   |

右脚总和

|            |       |
|------------|-------|
| 面积【mm²】    | 11530 |
| 负荷【%】      | 53    |
| 最大压强【gr/%】 | 211   |
| 平均压强【gr/%】 | 206   |

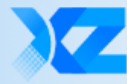

足弓类型

左脚

足弓指数 21.00%

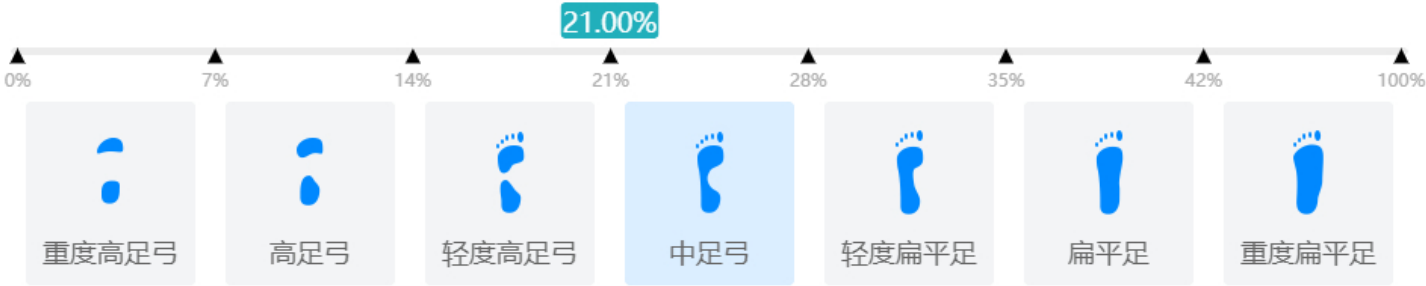

右脚

足弓指数 23.00%

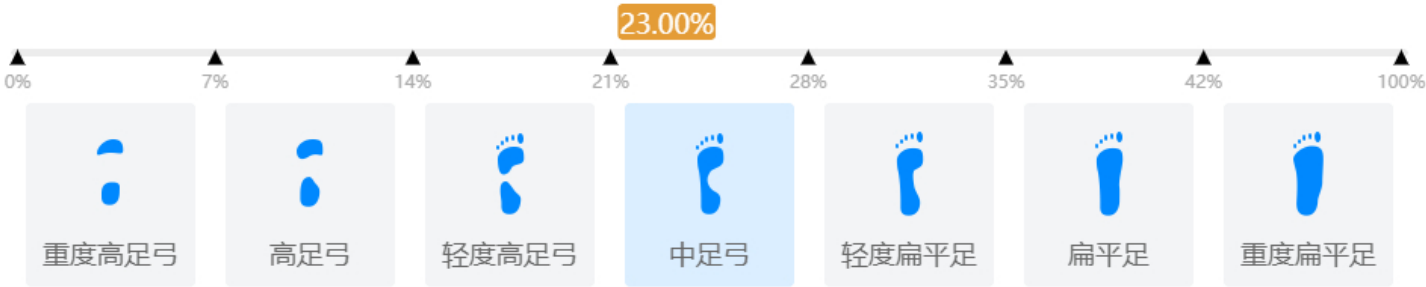

报告结论

左脚横弓塌陷  
右脚横弓塌陷  
身体重心过度靠后  
左右侧足弓形状压力差异较大
