# Supplementary material for: Individualized Corrective Training Based on Precision Biomechanical Assessment for the Prevention of Sports Injuries in Adolescents
Source: Research Square preprint supplement (doi:10.21203/rs.3.rs-8426574/v1), 2026-02-02
Supplement: Supplementary file 125 [file 静态报告-薛培爽-20250226130547.pdf › Plantar pressure and gait analysis/jump rope/静态报告-薛培爽-20250226130547.pdf]

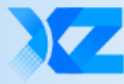

静态双脚数据

左脚

|            |      |
|------------|------|
| 面积【mm²】    | 8099 |
| 前/双足【%】    | 23   |
| 前/全足【%】    | 45   |
| 最大压强【gr/%】 | 194  |
| 平均压强【gr/%】 | 184  |

|            |      |
|------------|------|
| 面积【mm²】    | 5878 |
| 后/双足【%】    | 28   |
| 后/全足【%】    | 55   |
| 最大压强【gr/%】 | 313  |
| 平均压强【gr/%】 | 306  |

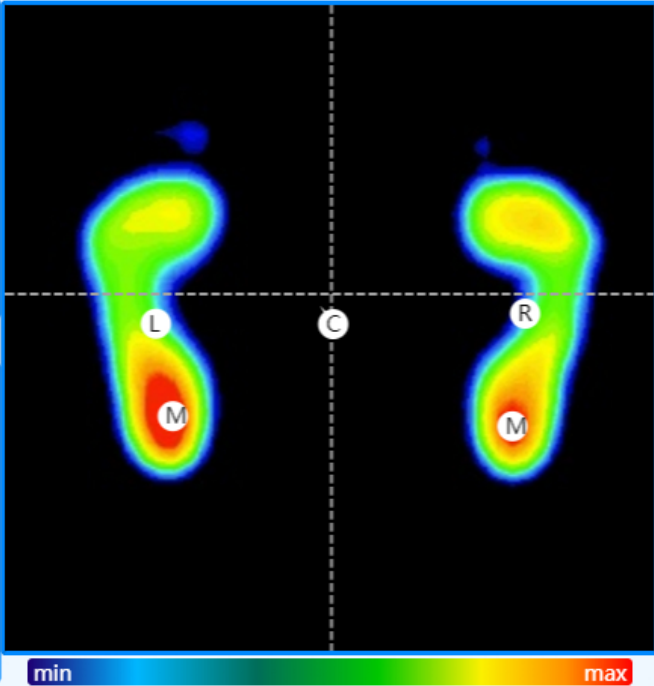

右脚

|            |      |
|------------|------|
| 面积【mm²】    | 7160 |
| 前/双足【%】    | 23   |
| 前/全足【%】    | 48   |
| 最大压强【gr/%】 | 213  |
| 平均压强【gr/%】 | 205  |

|            |      |
|------------|------|
| 面积【mm²】    | 5834 |
| 后/双足【%】    | 25   |
| 后/全足【%】    | 52   |
| 最大压强【gr/%】 | 287  |
| 平均压强【gr/%】 | 274  |

双脚综合数据

左脚总和

|            |       |
|------------|-------|
| 面积【mm²】    | 13977 |
| 负荷【%】      | 52    |
| 最大压强【gr/%】 | 239   |
| 平均压强【gr/%】 | 235   |

右脚总和

|            |       |
|------------|-------|
| 面积【mm²】    | 12995 |
| 负荷【%】      | 48    |
| 最大压强【gr/%】 | 243   |
| 平均压强【gr/%】 | 236   |

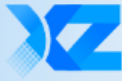

足弓类型

左脚

足弓指数 29.00%

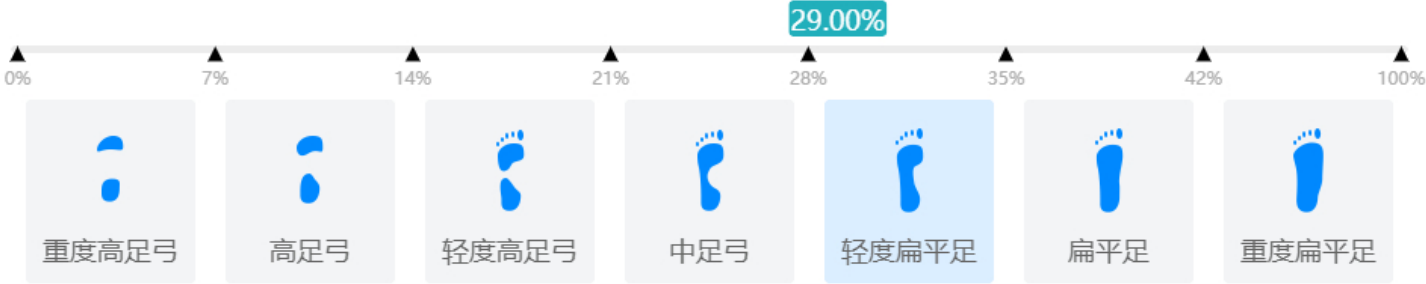

右脚

足弓指数 28.00%

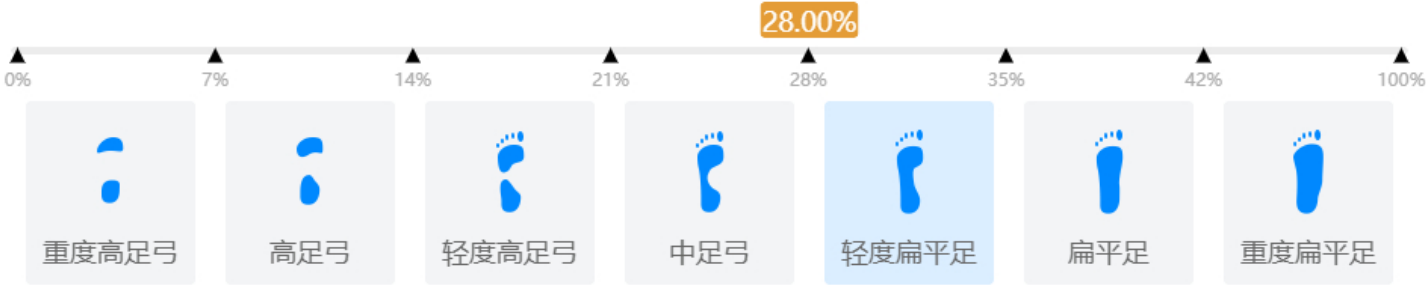

报告结论

左脚足弓偏低  
右脚横弓塌陷  
身体重心过度靠后
