# Supplementary material for: Individualized Corrective Training Based on Precision Biomechanical Assessment for the Prevention of Sports Injuries in Adolescents
Source: Research Square preprint supplement (doi:10.21203/rs.3.rs-8426574/v1), 2026-02-02
Supplement: Supplementary file 126 [file 静态报告-闫静雯-20250226125440.pdf › Plantar pressure and gait analysis/jump rope/静态报告-闫静雯-20250226125440.pdf]

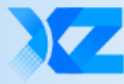

静态双脚数据

左脚

|            |      |
|------------|------|
| 面积【mm²】    | 8172 |
| 前/双足【%】    | 23   |
| 前/全足【%】    | 45   |
| 最大压强【gr/%】 | 166  |
| 平均压强【gr/%】 | 145  |

|            |      |
|------------|------|
| 面积【mm²】    | 5853 |
| 后/双足【%】    | 28   |
| 后/全足【%】    | 55   |
| 最大压强【gr/%】 | 263  |
| 平均压强【gr/%】 | 247  |

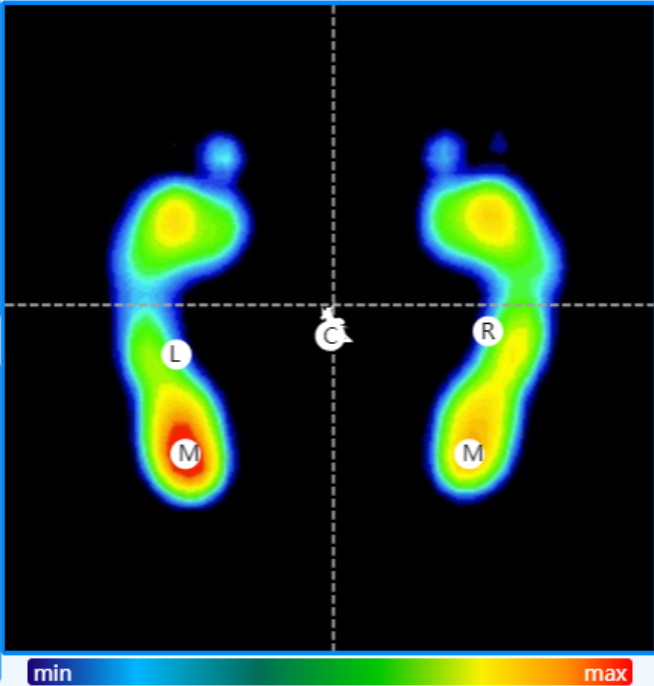

右脚

|            |      |
|------------|------|
| 面积【mm²】    | 7952 |
| 前/双足【%】    | 24   |
| 前/全足【%】    | 49   |
| 最大压强【gr/%】 | 172  |
| 平均压强【gr/%】 | 157  |

|            |      |
|------------|------|
| 面积【mm²】    | 6034 |
| 后/双足【%】    | 25   |
| 后/全足【%】    | 51   |
| 最大压强【gr/%】 | 248  |
| 平均压强【gr/%】 | 219  |

双脚综合数据

左脚总和

|            |       |
|------------|-------|
| 面积【mm²】    | 14025 |
| 负荷【%】      | 51    |
| 最大压强【gr/%】 | 194   |
| 平均压强【gr/%】 | 188   |

右脚总和

|            |       |
|------------|-------|
| 面积【mm²】    | 13987 |
| 负荷【%】      | 49    |
| 最大压强【gr/%】 | 199   |
| 平均压强【gr/%】 | 184   |

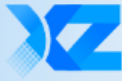

足弓类型

左脚

足弓指数 25.00%

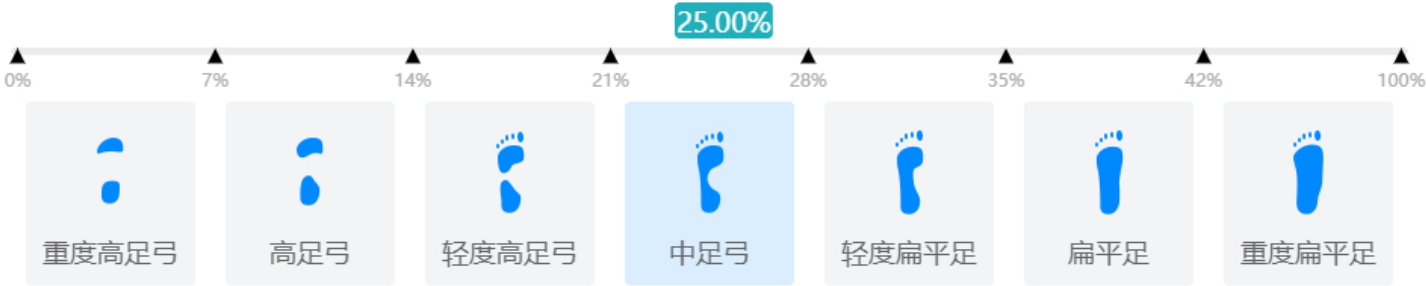

右脚

足弓指数 26.00%

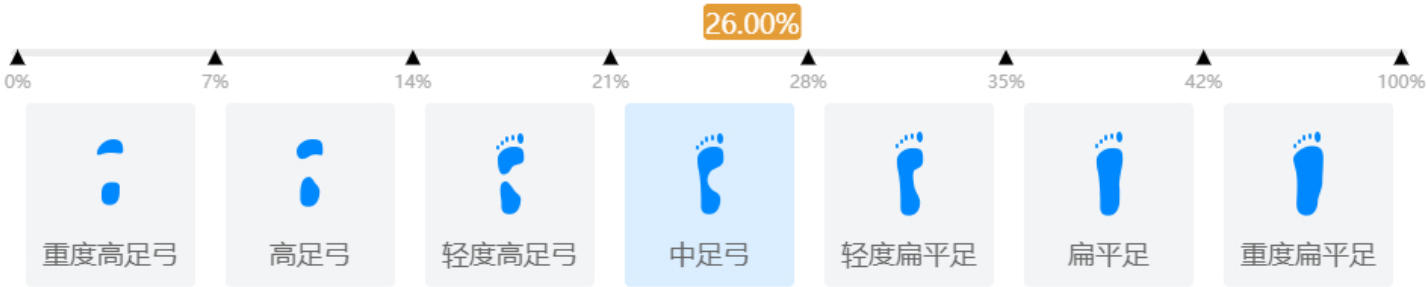

报告结论

左脚横弓塌陷  
右脚横弓塌陷  
身体重心过度靠后
