# Supplementary material for: Individualized Corrective Training Based on Precision Biomechanical Assessment for the Prevention of Sports Injuries in Adolescents
Source: Research Square preprint supplement (doi:10.21203/rs.3.rs-8426574/v1), 2026-02-02
Supplement: Supplementary file 127 [file 静态报告-龚泳霖-20250226165823.pdf › Plantar pressure and gait analysis/jump rope/静态报告-龚泳霖-20250226165823.pdf]

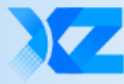

静态双脚数据

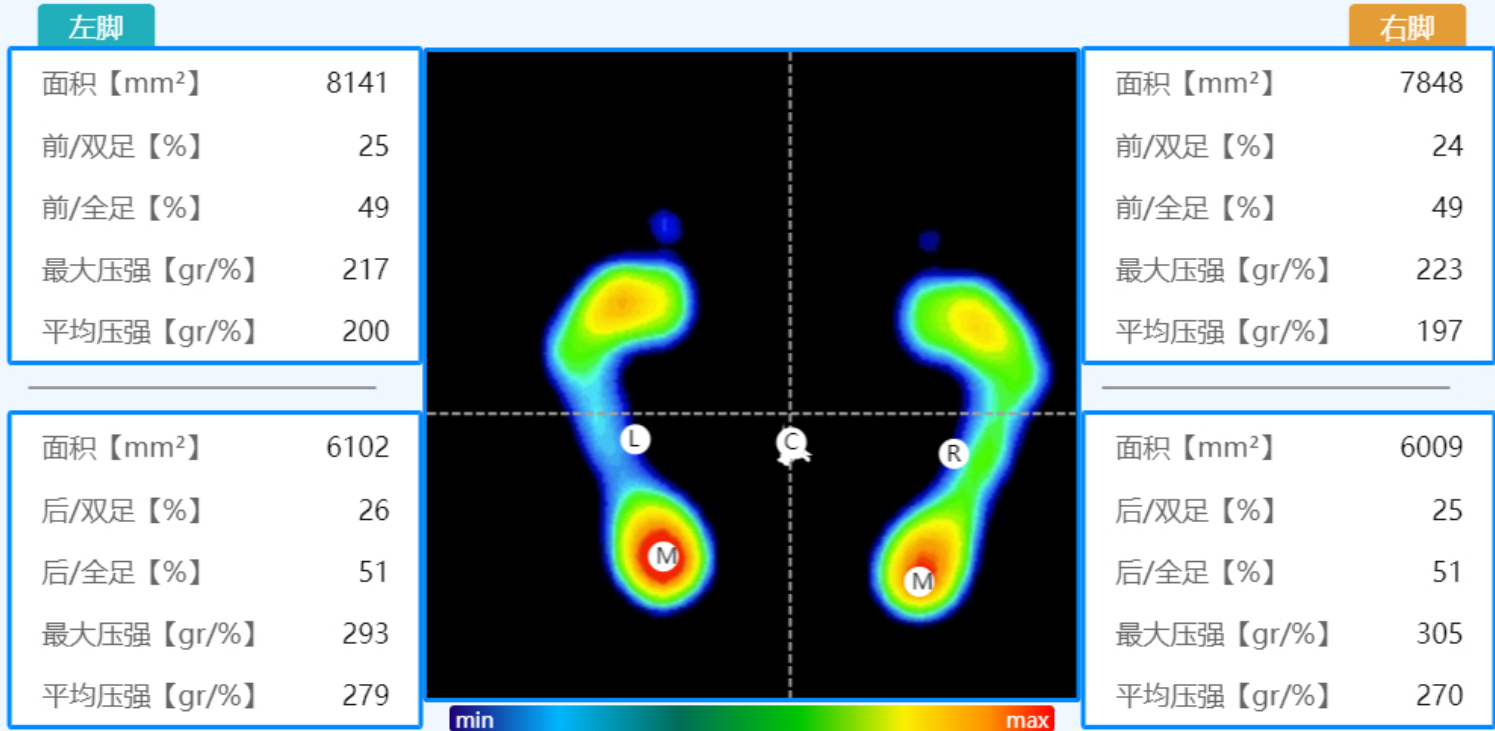

双脚综合数据

| 左脚总和                 |       | 右脚总和                 |       |
|----------------------|-------|----------------------|-------|
| 面积【mm <sup>2</sup> 】 | 14243 | 面积【mm <sup>2</sup> 】 | 13857 |
| 负荷【%】                | 51    | 负荷【%】                | 49    |
| 最大压强【gr/%】           | 246   | 最大压强【gr/%】           | 251   |
| 平均压强【gr/%】           | 234   | 平均压强【gr/%】           | 229   |

静态报告

龚泳霖 18岁 男 70.0kg 177.0cm 2025-2-26 16:57:52



足弓类型

左脚

足弓指数 23.00%

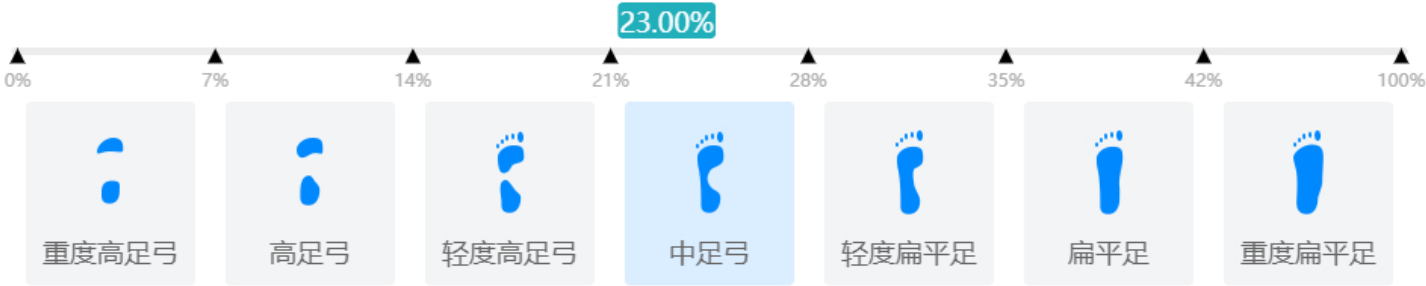

右脚

足弓指数 24.00%

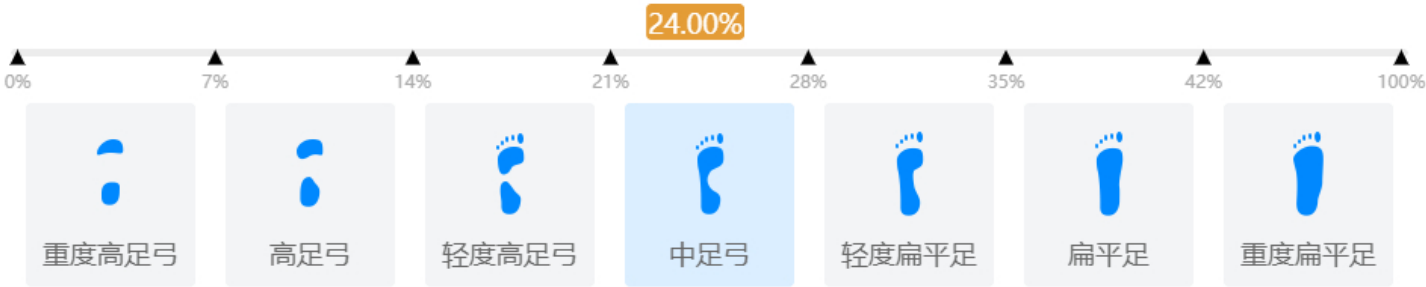

报告结论

左脚横弓塌陷  
右脚横弓塌陷  
身体重心过度靠后
