# Supplementary material for: Individualized Corrective Training Based on Precision Biomechanical Assessment for the Prevention of Sports Injuries in Adolescents
Source: Research Square preprint supplement (doi:10.21203/rs.3.rs-8426574/v1), 2026-02-02
Supplement: Supplementary file 128 [file 动态报告-何依雯-20250226140132.pdf › Plantar pressure and gait analysis/soccer/动态报告-何依雯-20250226140132.pdf]

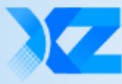

左右脚动态数据

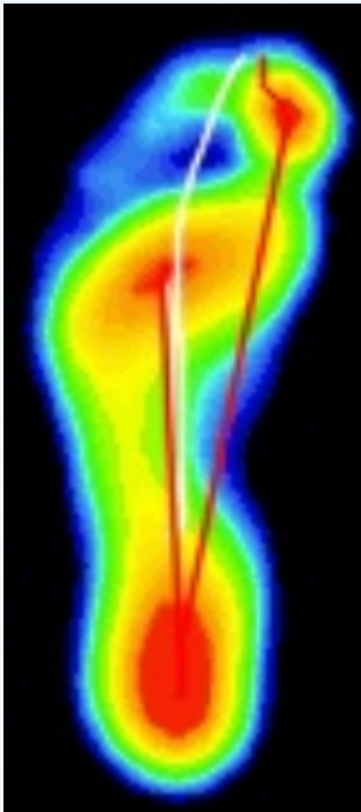

| 第1步      | Cop数据     | 第2步      |
|----------|-----------|----------|
| 235.60   | cop距离【mm】 | 207.13   |
| 4.90     | 步偏脚【°】    | 8.56     |
| 10153.68 | 面积【mm²】   | 9899.13  |
| 22466.62 | 压力【kgf】   | 23023.82 |
| 1.96     | 压强【gr/%】  | 2.12     |
| 36693.13 | 最大压力【kgf】 | 36225.93 |
| 0.23     | 速度【mm/ms】 | 0.19     |

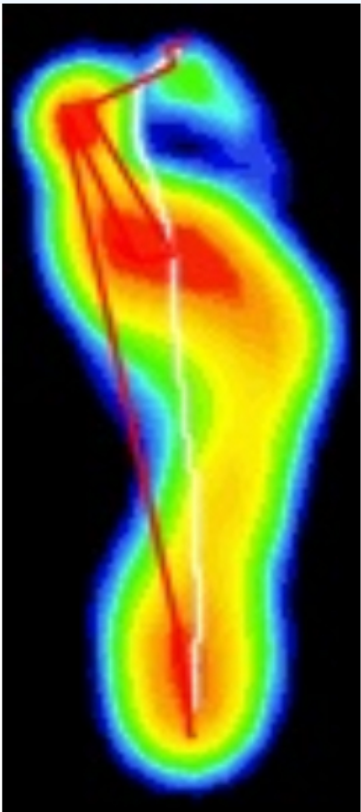

支撑相

左脚

|             |          |
|-------------|----------|
| ● 着地期 8%    |          |
| 时长【ms】      | 80.00    |
| 平均速度【mm/ms】 | 0.04     |
| 最大面积【mm²】   | 2517.75  |
| 最大压力【kgf】   | 2053.79  |
| ● 平足期 78%   |          |
| 时长【ms】      | 800.00   |
| 平均速度【mm/ms】 | 0.20     |
| 最大面积【mm²】   | 15306.75 |
| 最大压力【kgf】   | 36693.13 |
| ● 蹬伸期 14%   |          |
| 时长【ms】      | 140.00   |
| 平均速度【mm/ms】 | 0.32     |
| 最大面积【mm²】   | 7769.25  |
| 最大压力【kgf】   | 17420.49 |

右脚

|             |          |
|-------------|----------|
| ● 着地期 6%    |          |
| 时长【ms】      | 73.33    |
| 平均速度【mm/ms】 | 0.10     |
| 最大面积【mm²】   | 3352.00  |
| 最大压力【kgf】   | 6163.48  |
| ● 平足期 80%   |          |
| 时长【ms】      | 946.67   |
| 平均速度【mm/ms】 | 0.16     |
| 最大面积【mm²】   | 14919.25 |
| 最大压力【kgf】   | 37469.29 |
| ● 蹬伸期 13%   |          |
| 时长【ms】      | 155.56   |
| 平均速度【mm/ms】 | 0.27     |
| 最大面积【mm²】   | 6250.50  |
| 最大压力【kg/f】  | 12035.09 |

内外翻

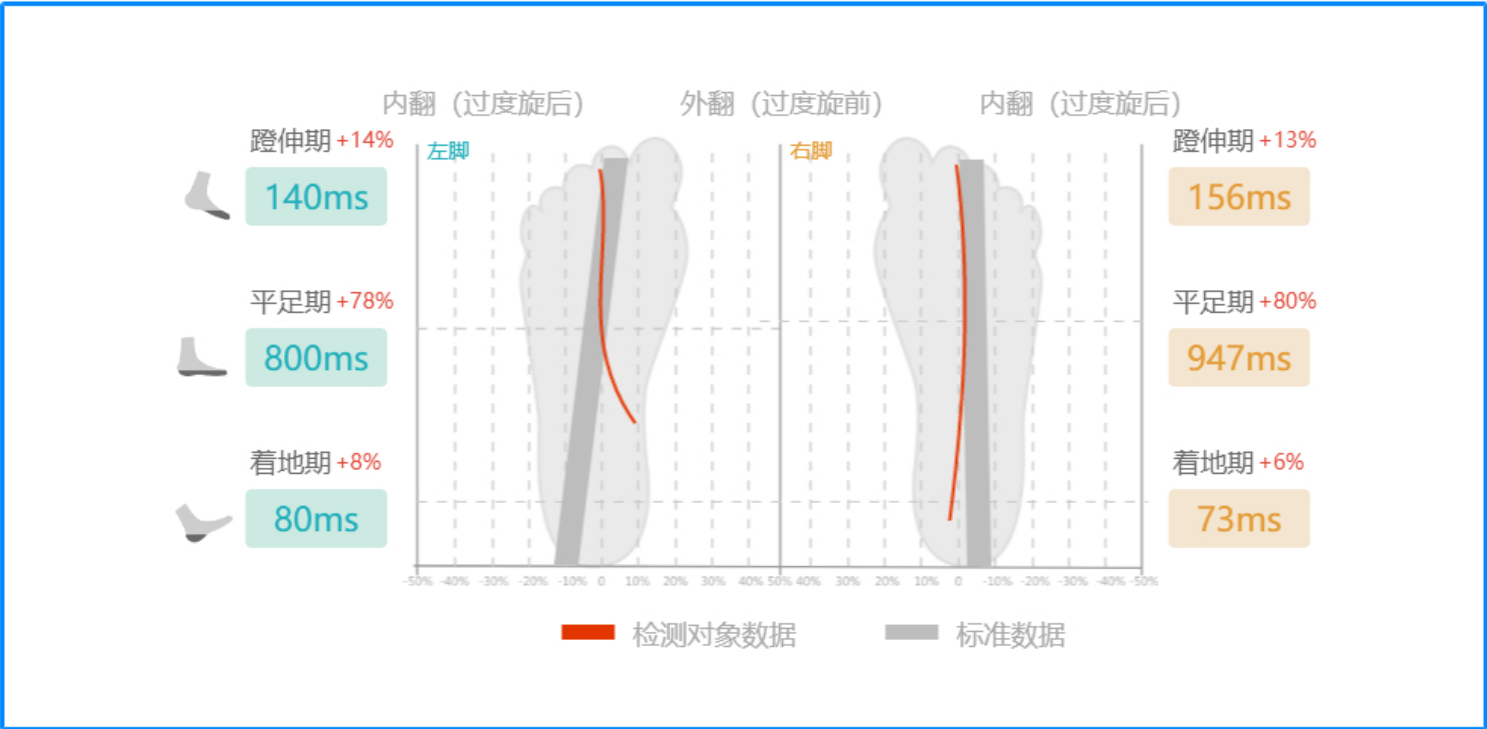

足弓类型

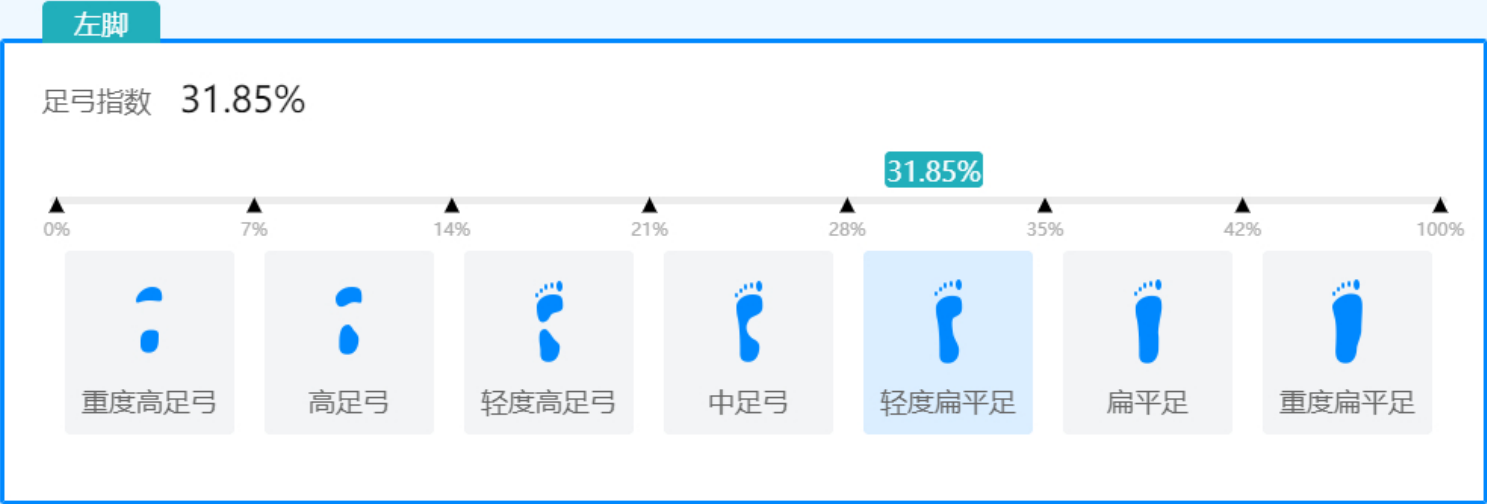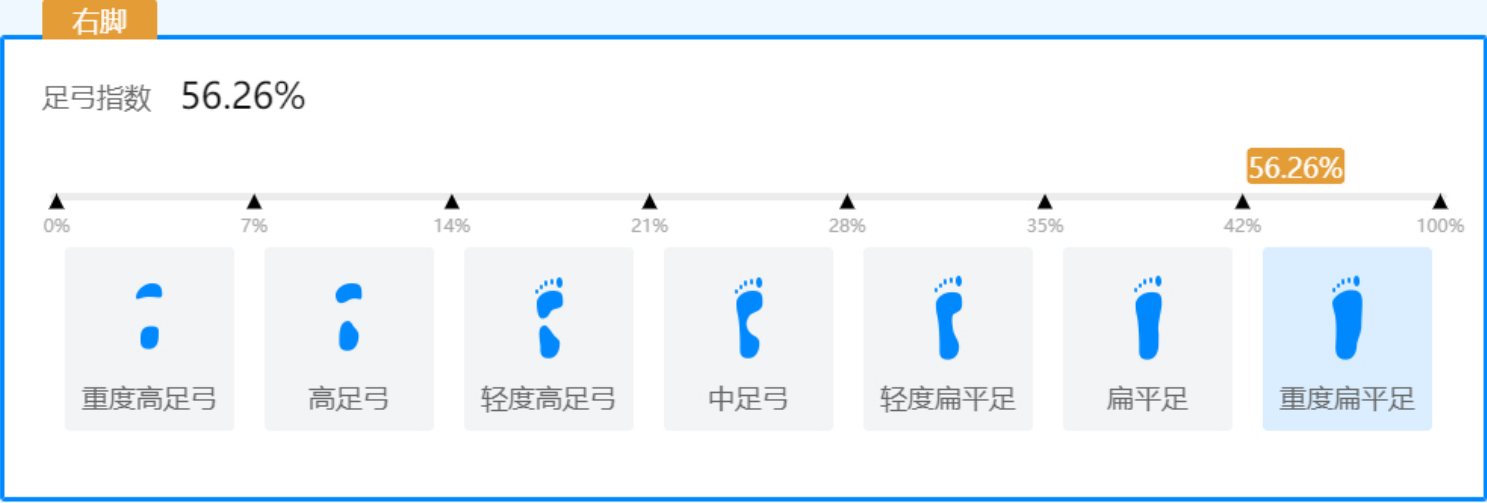

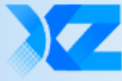

报告结论
