# Supplementary material for: Individualized Corrective Training Based on Precision Biomechanical Assessment for the Prevention of Sports Injuries in Adolescents
Source: Research Square preprint supplement (doi:10.21203/rs.3.rs-8426574/v1), 2026-02-02
Supplement: Supplementary file 129 [file 动态报告-何长强-20250228121909.pdf › Plantar pressure and gait analysis/soccer/动态报告-何长强-20250228121909.pdf]

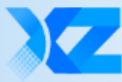

左右脚动态数据

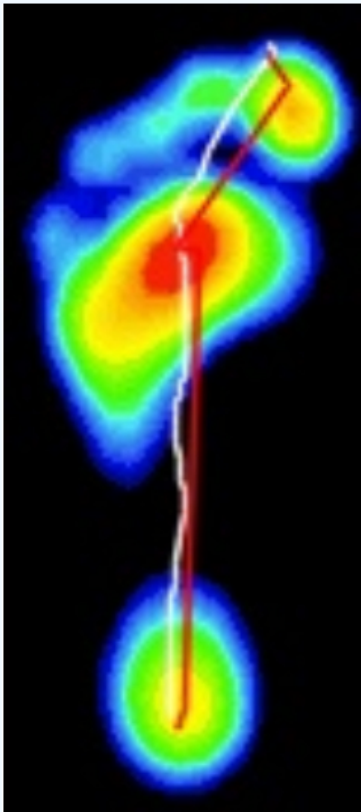

| 第2步      | Cop数据     | 第1步      |
|----------|-----------|----------|
| 229.99   | cop距离【mm】 | 230.76   |
| 5.39     | 步偏脚【°】    | 6.02     |
| 9427.64  | 面积【mm²】   | 10231.36 |
| 22066.30 | 压力【kgf】   | 24355.04 |
| 2.12     | 压强【gr/%】  | 2.22     |
| 35825.21 | 最大压力【kgf】 | 35939.06 |
| 0.24     | 速度【mm/ms】 | 0.26     |

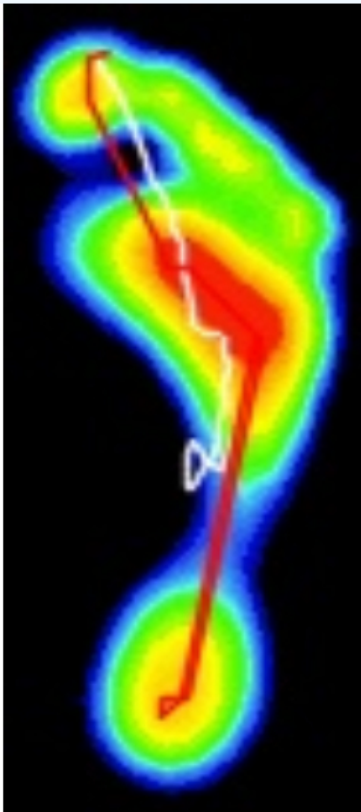

支撑相

左脚

|             |          |
|-------------|----------|
| ● 着地期 9%    |          |
| 时长【ms】      | 90.00    |
| 平均速度【mm/ms】 | 0.25     |
| 最大面积【mm²】   | 4480.88  |
| 最大压力【kgf】   | 8935.56  |
| ● 平足期 79%   |          |
| 时长【ms】      | 825.00   |
| 平均速度【mm/ms】 | 0.17     |
| 最大面积【mm²】   | 14794.88 |
| 最大压力【kgf】   | 35863.43 |
| ● 蹬伸期 13%   |          |
| 时长【ms】      | 130.00   |
| 平均速度【mm/ms】 | 0.38     |
| 最大面积【mm²】   | 6430.50  |
| 最大压力【kgf】   | 12541.93 |

右脚

|             |          |
|-------------|----------|
| ● 着地期 6%    |          |
| 时长【ms】      | 65.00    |
| 平均速度【mm/ms】 | 0.20     |
| 最大面积【mm²】   | 3448.13  |
| 最大压力【kgf】   | 6064.75  |
| ● 平足期 79%   |          |
| 时长【ms】      | 788.00   |
| 平均速度【mm/ms】 | 0.19     |
| 最大面积【mm²】   | 13536.00 |
| 最大压力【kgf】   | 34600.00 |
| ● 蹬伸期 16%   |          |
| 时长【ms】      | 168.00   |
| 平均速度【mm/ms】 | 0.30     |
| 最大面积【mm²】   | 7750.80  |
| 最大压力【kgf】   | 19773.27 |

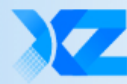

内外翻

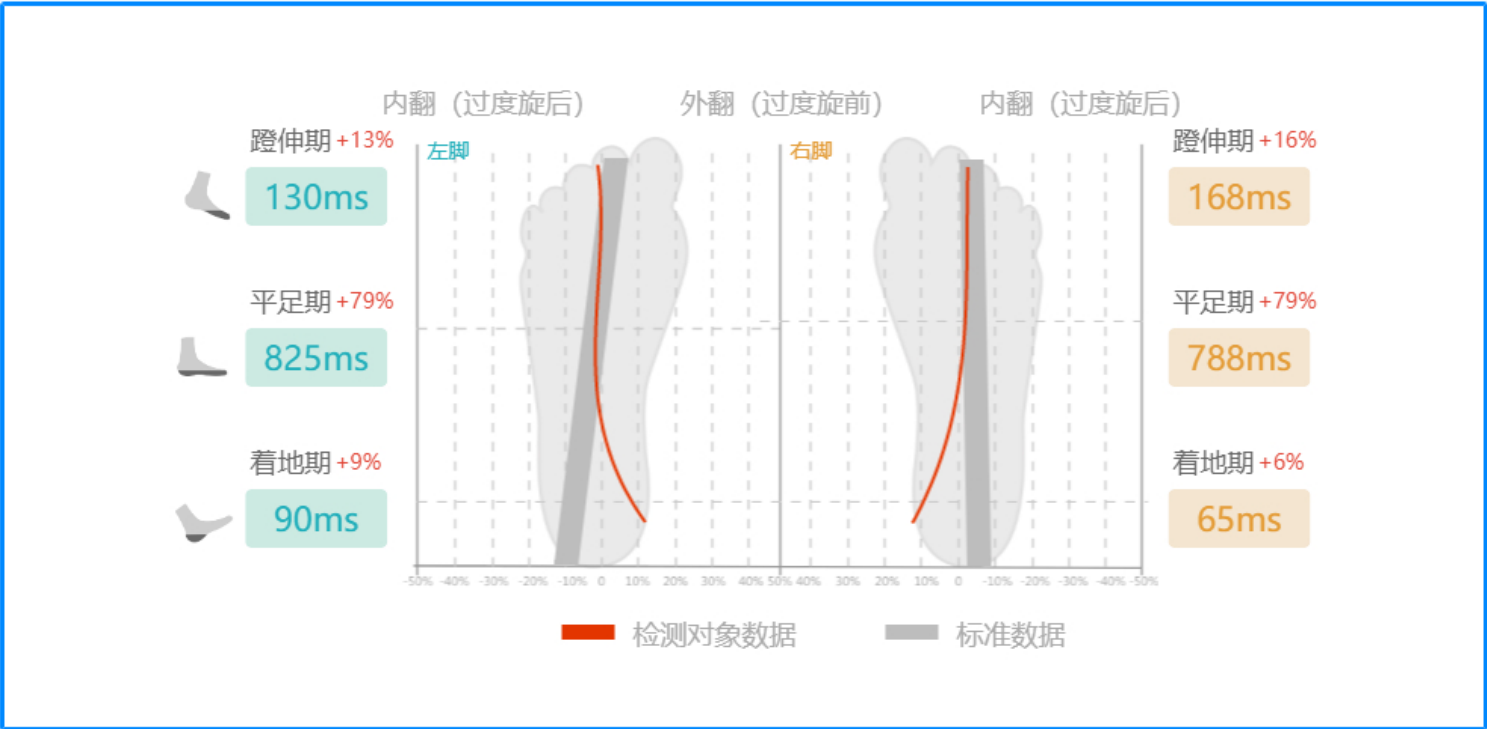

足弓类型

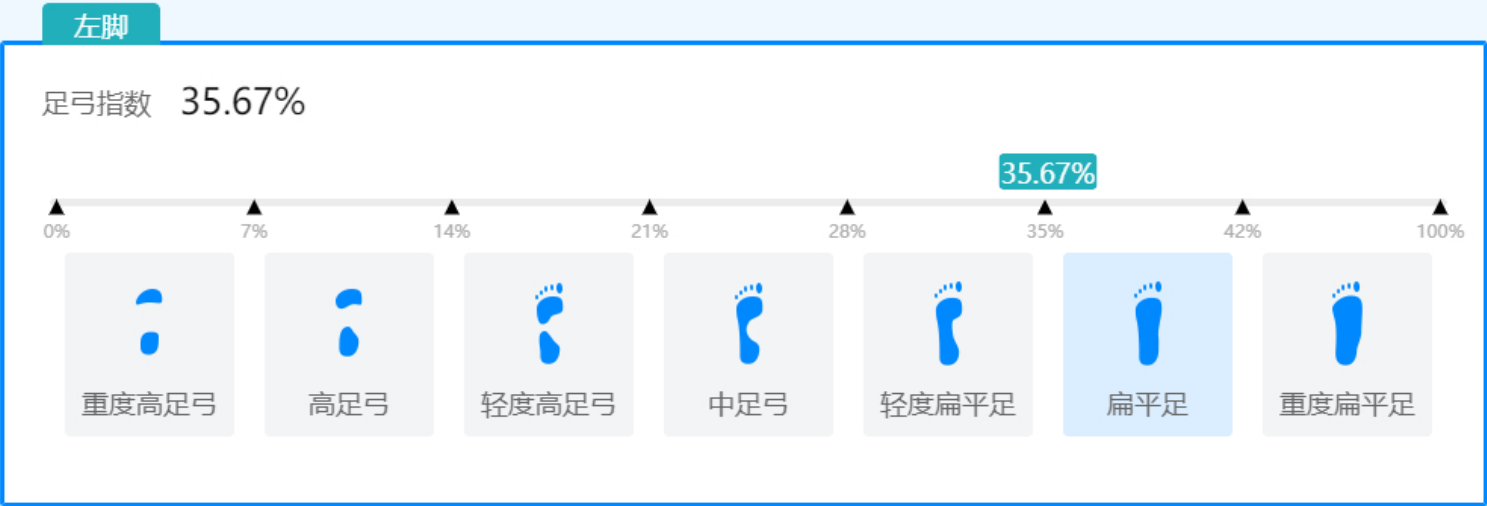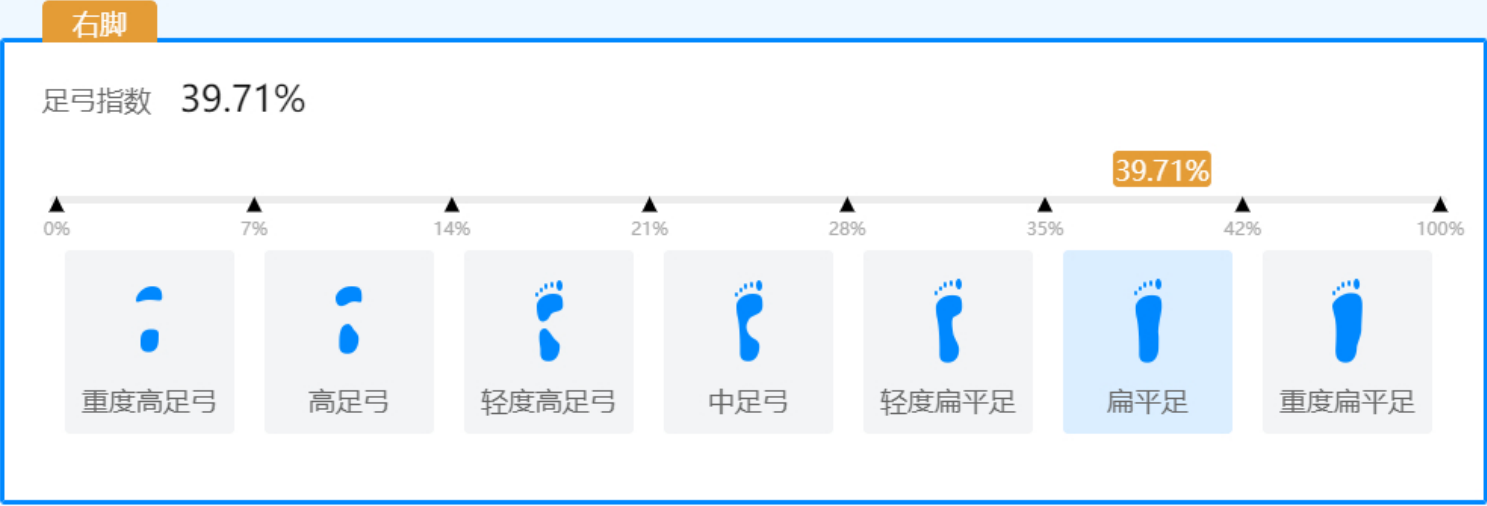

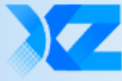

报告结论
