# Supplementary material for: Individualized Corrective Training Based on Precision Biomechanical Assessment for the Prevention of Sports Injuries in Adolescents
Source: Research Square preprint supplement (doi:10.21203/rs.3.rs-8426574/v1), 2026-02-02
Supplement: Supplementary file 130 [file 动态报告-席耘赫-20250226110744.pdf › Plantar pressure and gait analysis/soccer/动态报告-席耘赫-20250226110744.pdf]

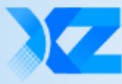

左右脚动态数据

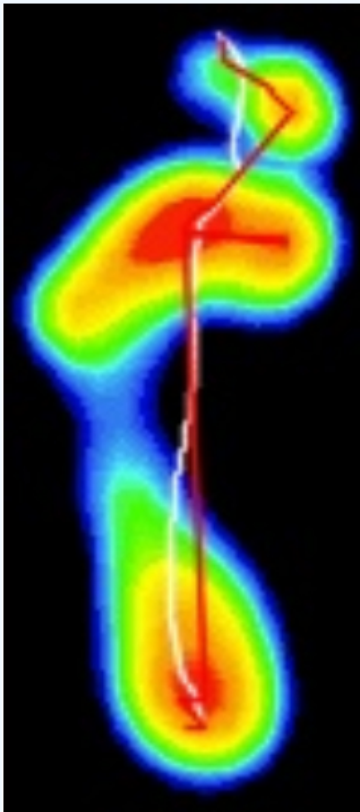

| 第1步      | Cop数据     | 第3步      |
|----------|-----------|----------|
| 233.87   | cop距离【mm】 | 211.80   |
| 3.41     | 步偏脚【°】    | 6.37     |
| 9757.17  | 面积【mm²】   | 10012.78 |
| 23057.83 | 压力【kgf】   | 21956.43 |
| 2.20     | 压强【gr/%】  | 2.02     |
| 36599.14 | 最大压力【kgf】 | 36951.94 |
| 0.21     | 速度【mm/ms】 | 0.22     |

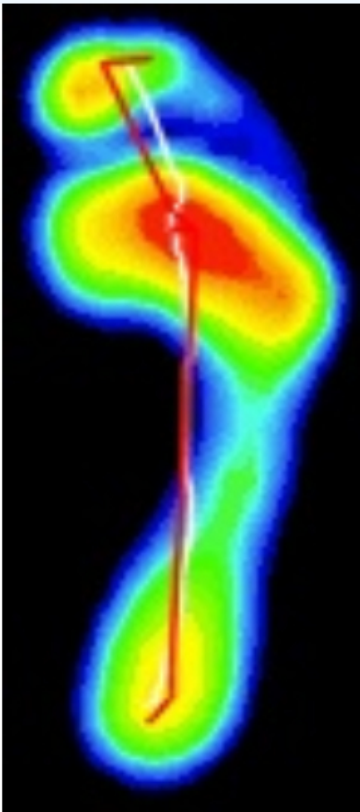

支撑相

左脚

|             |          |
|-------------|----------|
| ● 着地期 6%    |          |
| 时长【ms】      | 60.00    |
| 平均速度【mm/ms】 | 0.09     |
| 最大面积【mm²】   | 3457.13  |
| 最大压力【kgf】   | 6718.84  |
| ● 平足期 76%   |          |
| 时长【ms】      | 750.00   |
| 平均速度【mm/ms】 | 0.21     |
| 最大面积【mm²】   | 15289.88 |
| 最大压力【kgf】   | 36321.94 |
| ● 蹬伸期 17%   |          |
| 时长【ms】      | 173.33   |
| 平均速度【mm/ms】 | 0.30     |
| 最大面积【mm²】   | 7752.75  |
| 最大压力【kgf】   | 18794.64 |

右脚

|             |          |
|-------------|----------|
| ● 着地期 8%    |          |
| 时长【ms】      | 80.00    |
| 平均速度【mm/ms】 | 0.07     |
| 最大面积【mm²】   | 3797.25  |
| 最大压力【kgf】   | 8666.10  |
| ● 平足期 74%   |          |
| 时长【ms】      | 753.33   |
| 平均速度【mm/ms】 | 0.21     |
| 最大面积【mm²】   | 15257.25 |
| 最大压力【kgf】   | 35759.57 |
| ● 蹬伸期 18%   |          |
| 时长【ms】      | 186.67   |
| 平均速度【mm/ms】 | 0.26     |
| 最大面积【mm²】   | 8217.75  |
| 最大压力【kgf】   | 20359.07 |

内外翻

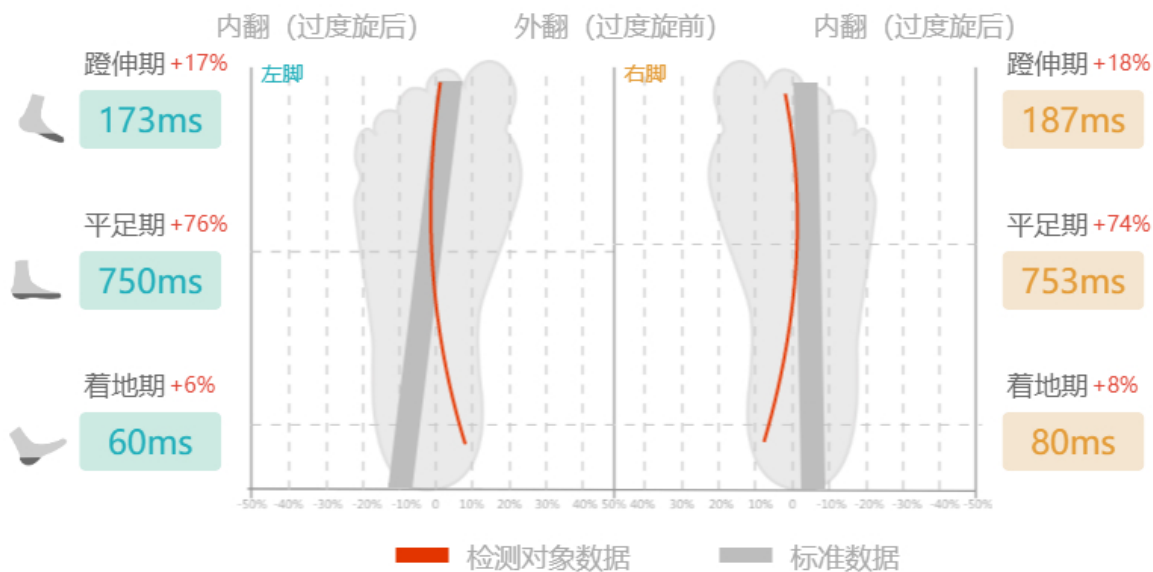

足弓类型

左脚

足弓指数 23.07%

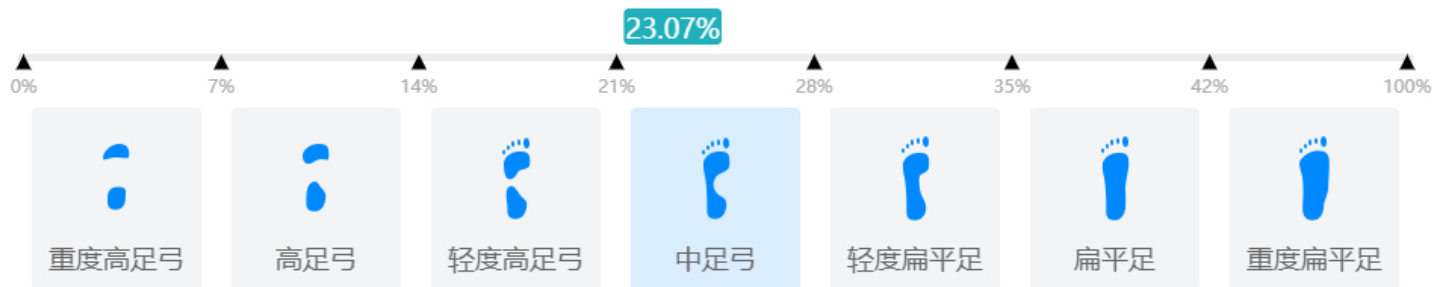

右脚

足弓指数 22.24%

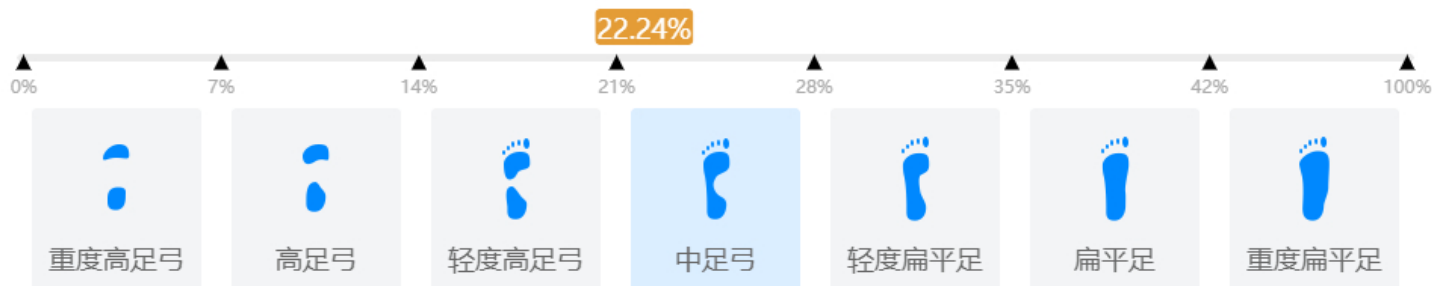

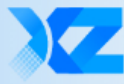

报告结论
