# Supplementary material for: Individualized Corrective Training Based on Precision Biomechanical Assessment for the Prevention of Sports Injuries in Adolescents
Source: Research Square preprint supplement (doi:10.21203/rs.3.rs-8426574/v1), 2026-02-02
Supplement: Supplementary file 131 [file 动态报告-张佳涵-20250226122539.pdf › Plantar pressure and gait analysis/soccer/动态报告-张佳涵-20250226122539.pdf]

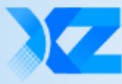

左右脚动态数据

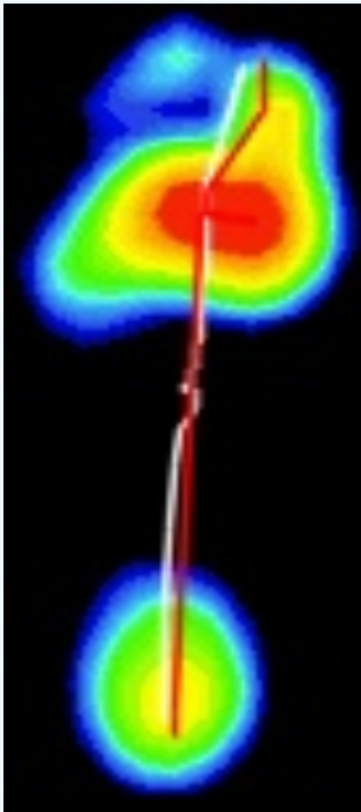

| 第1步      | Cop数据     | 第5步      |
|----------|-----------|----------|
| 208.45   | cop距离【mm】 | 212.13   |
| 2.42     | 步偏脚【°】    | 9.33     |
| 8489.42  | 面积【mm²】   | 8319.02  |
| 20191.18 | 压力【kgf】   | 21276.68 |
| 2.19     | 压强【gr/%】  | 2.37     |
| 32936.21 | 最大压力【kgf】 | 32507.09 |
| 0.20     | 速度【mm/ms】 | 0.23     |

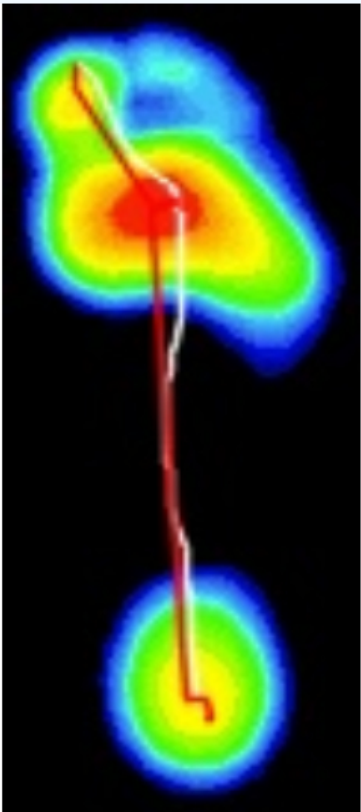

支撑相

左脚

|             |          |
|-------------|----------|
| ● 着地期 13%   |          |
| 时长【ms】      | 137.14   |
| 平均速度【mm/ms】 | 0.31     |
| 最大面积【mm²】   | 5885.04  |
| 最大压力【kgf】   | 12049.96 |
| ● 平足期 64%   |          |
| 时长【ms】      | 668.57   |
| 平均速度【mm/ms】 | 0.17     |
| 最大面积【mm²】   | 13346.36 |
| 最大压力【kgf】   | 33537.71 |
| ● 蹬伸期 23%   |          |
| 时长【ms】      | 234.29   |
| 平均速度【mm/ms】 | 0.23     |
| 最大面积【mm²】   | 7332.11  |
| 最大压力【kgf】   | 20697.03 |

右脚

|             |          |
|-------------|----------|
| ● 着地期 7%    |          |
| 时长【ms】      | 66.67    |
| 平均速度【mm/ms】 | 0.22     |
| 最大面积【mm²】   | 4035.75  |
| 最大压力【kgf】   | 7218.05  |
| ● 平足期 82%   |          |
| 时长【ms】      | 786.67   |
| 平均速度【mm/ms】 | 0.19     |
| 最大面积【mm²】   | 13909.50 |
| 最大压力【kgf】   | 35020.16 |
| ● 蹬伸期 11%   |          |
| 时长【ms】      | 106.67   |
| 平均速度【mm/ms】 | 0.30     |
| 最大面积【mm²】   | 5651.25  |
| 最大压力【kgf】   | 11577.04 |

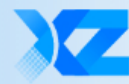

内外翻

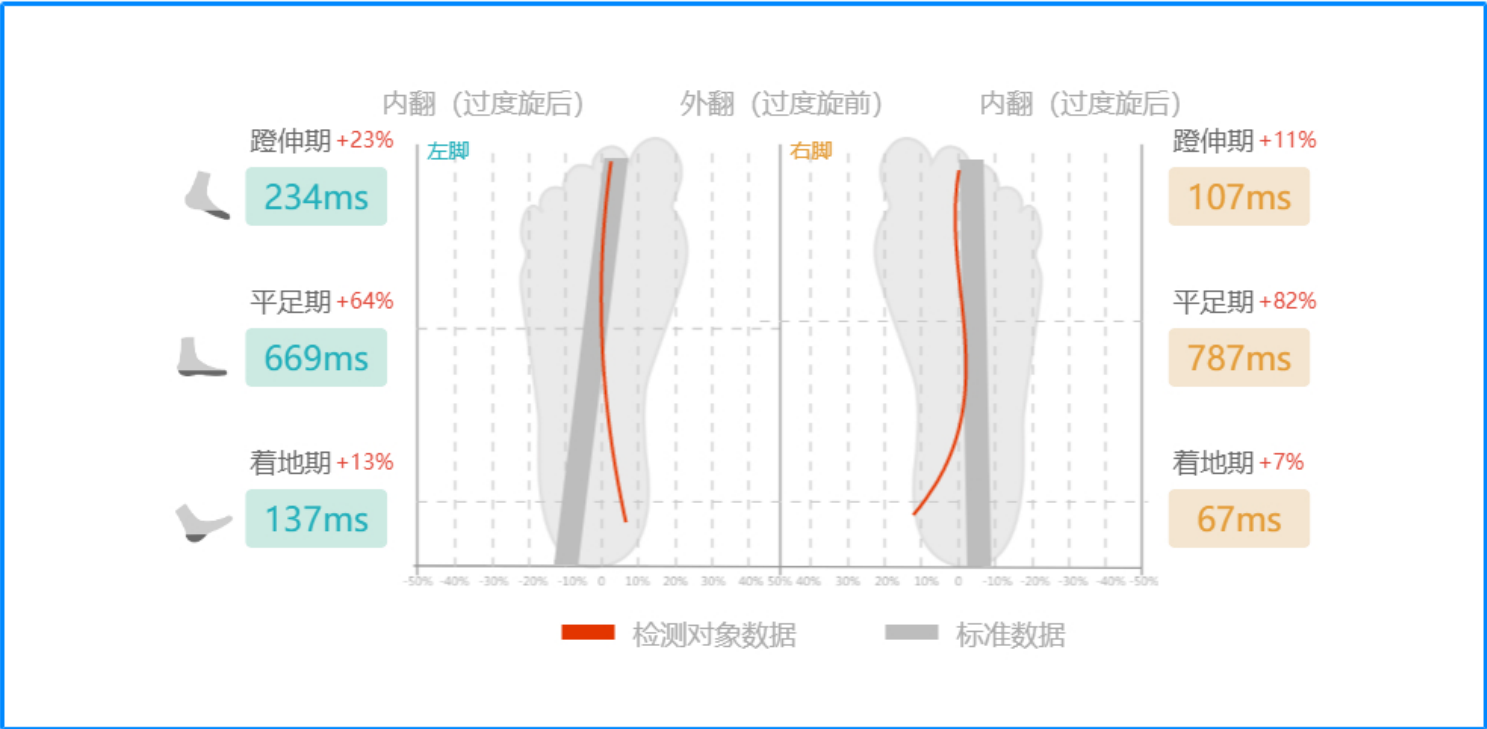

足弓类型

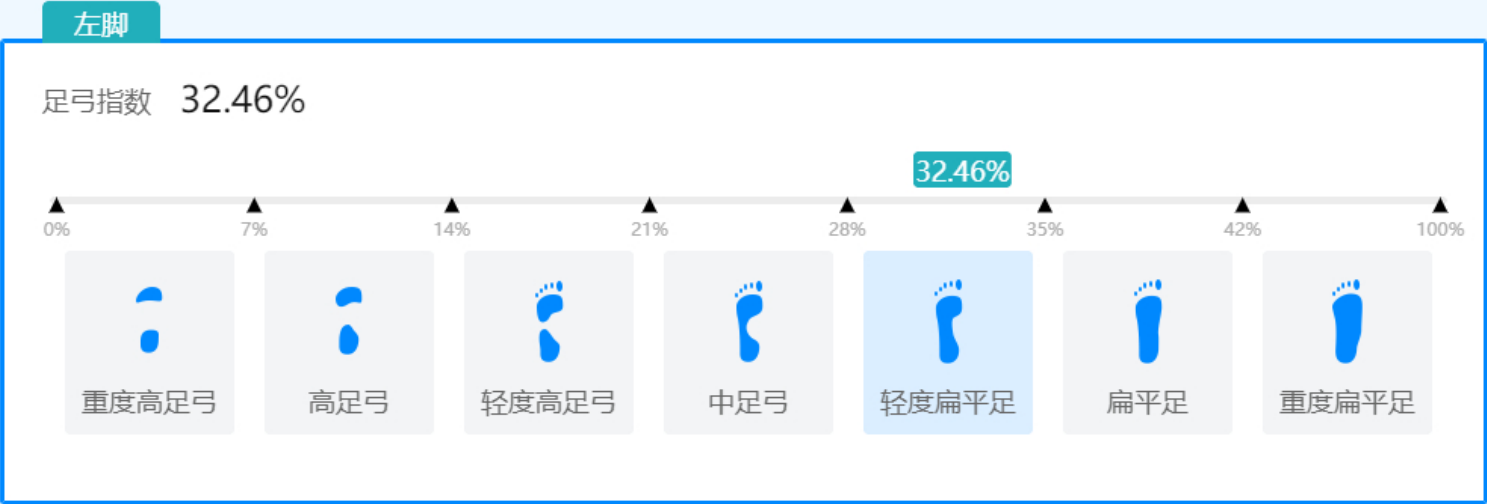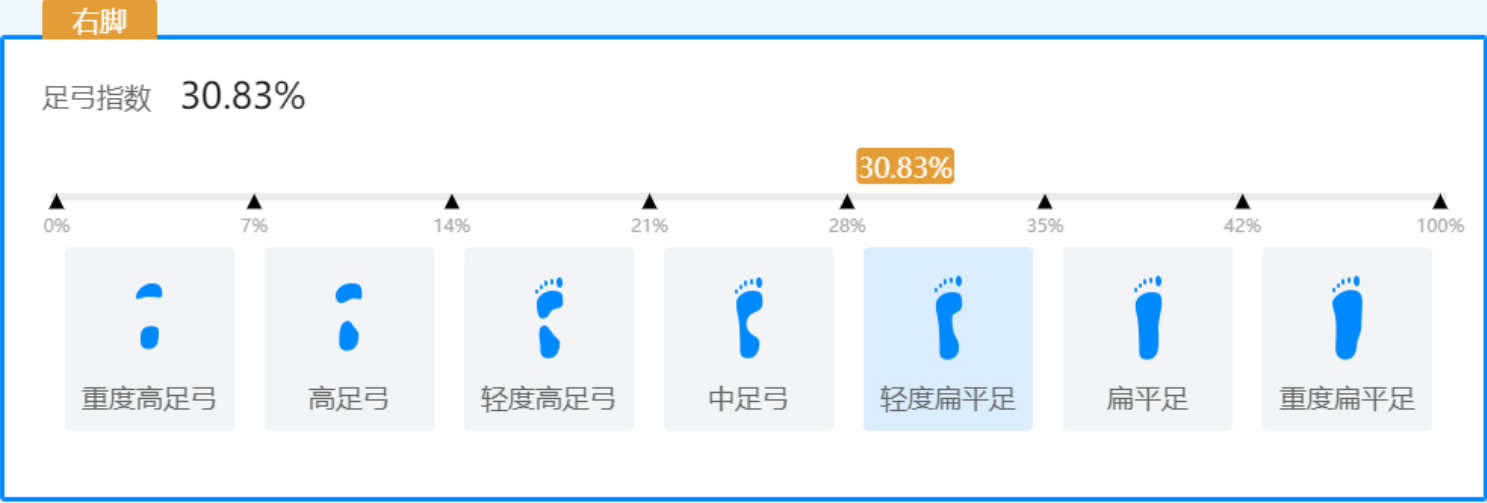

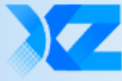

报告结论
