# Supplementary material for: Individualized Corrective Training Based on Precision Biomechanical Assessment for the Prevention of Sports Injuries in Adolescents
Source: Research Square preprint supplement (doi:10.21203/rs.3.rs-8426574/v1), 2026-02-02
Supplement: Supplementary file 132 [file 动态报告-张凌志-20250226103916.pdf › Plantar pressure and gait analysis/soccer/动态报告-张凌志-20250226103916.pdf]

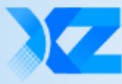

左右脚动态数据

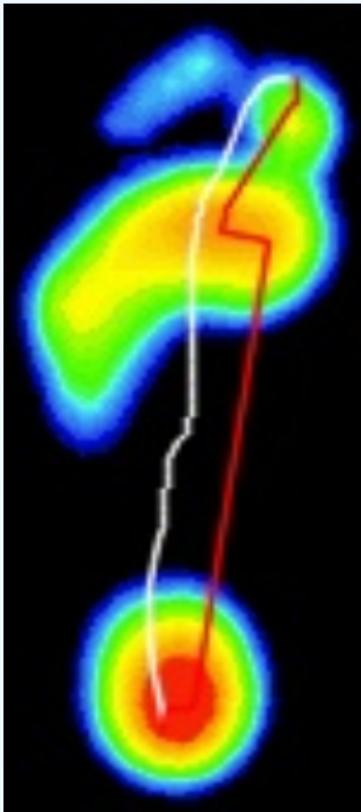

| 第2步      | Cop数据     | 第1步      |
|----------|-----------|----------|
| 232.65   | cop距离【mm】 | 226.80   |
| 9.19     | 步偏脚【°】    | 9.18     |
| 10163.85 | 面积【mm²】   | 9663.00  |
| 27129.48 | 压力【kgf】   | 25618.95 |
| 2.47     | 压强【gr/%】  | 2.46     |
| 41488.69 | 最大压力【kgf】 | 39076.27 |
| 0.26     | 速度【mm/ms】 | 0.29     |

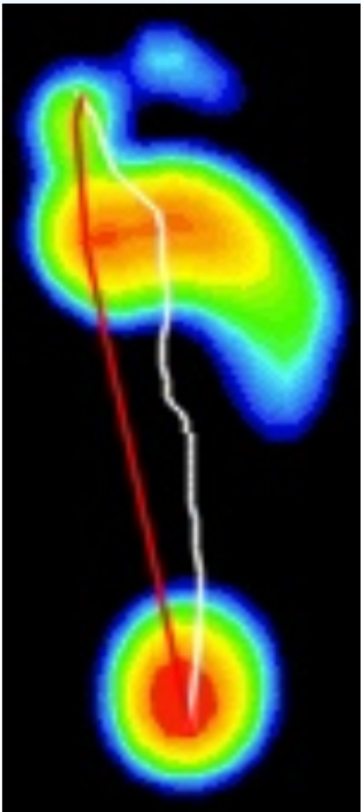

支撑相

左脚

|             |          |
|-------------|----------|
| ● 着地期 7%    |          |
| 时长【ms】      | 68.00    |
| 平均速度【mm/ms】 | 0.08     |
| 最大面积【mm²】   | 3252.15  |
| 最大压力【kgf】   | 7000.82  |
| ● 平足期 75%   |          |
| 时长【ms】      | 696.00   |
| 平均速度【mm/ms】 | 0.23     |
| 最大面积【mm²】   | 15456.60 |
| 最大压力【kgf】   | 43014.54 |
| ● 蹬伸期 17%   |          |
| 时长【ms】      | 160.00   |
| 平均速度【mm/ms】 | 0.33     |
| 最大面积【mm²】   | 8882.55  |
| 最大压力【kgf】   | 25124.43 |

右脚

|             |          |
|-------------|----------|
| ● 着地期 8%    |          |
| 时长【ms】      | 72.00    |
| 平均速度【mm/ms】 | 0.10     |
| 最大面积【mm²】   | 3679.20  |
| 最大压力【kgf】   | 7963.74  |
| ● 平足期 73%   |          |
| 时长【ms】      | 628.00   |
| 平均速度【mm/ms】 | 0.23     |
| 最大面积【mm²】   | 14721.30 |
| 最大压力【kgf】   | 40457.68 |
| ● 蹬伸期 19%   |          |
| 时长【ms】      | 160.00   |
| 平均速度【mm/ms】 | 0.29     |
| 最大面积【mm²】   | 9134.10  |
| 最大压力【kg/f】  | 28120.57 |

内外翻

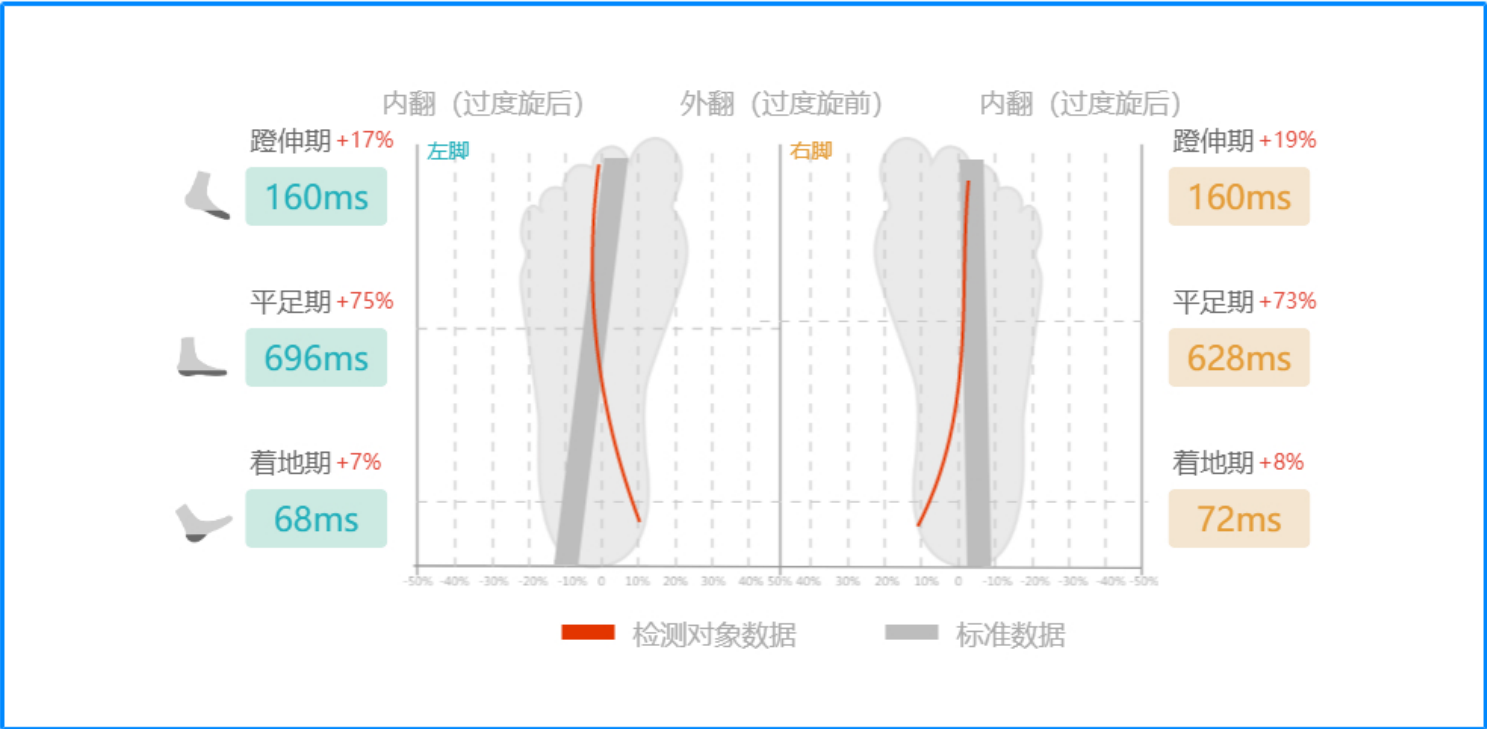

足弓类型

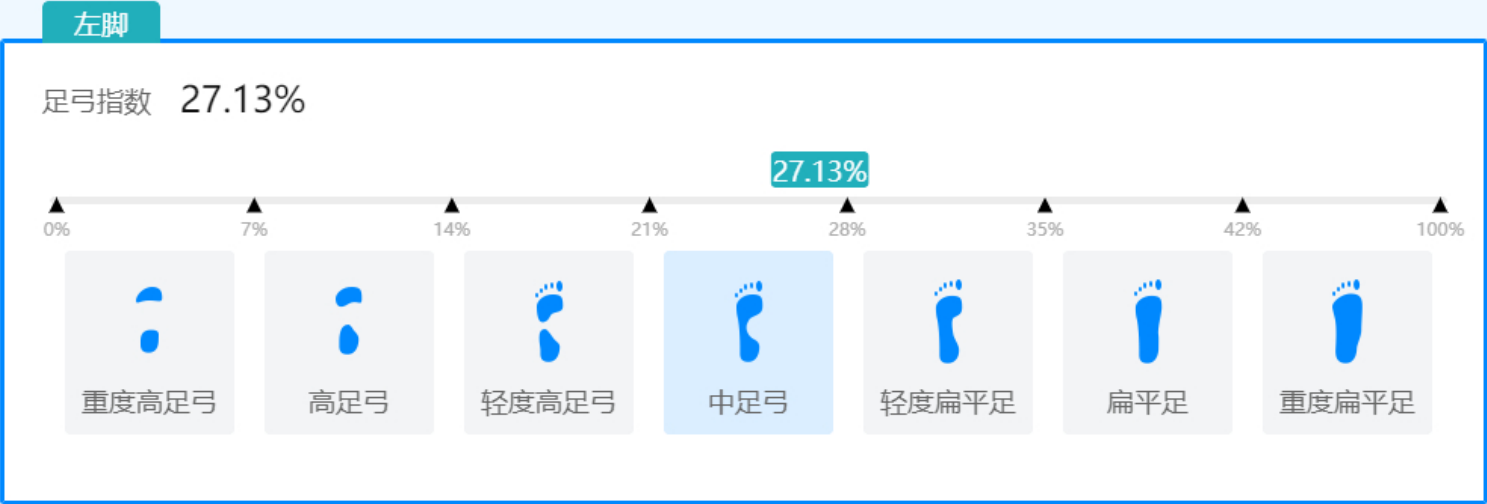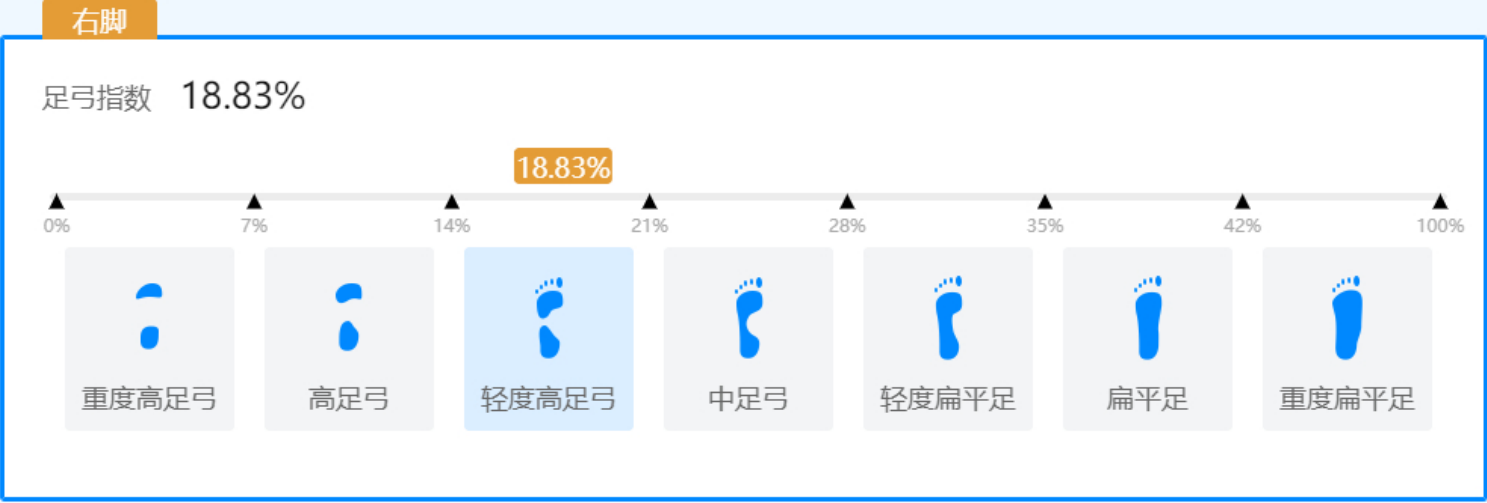

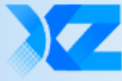

报告结论
