# Supplementary material for: Individualized Corrective Training Based on Precision Biomechanical Assessment for the Prevention of Sports Injuries in Adolescents
Source: Research Square preprint supplement (doi:10.21203/rs.3.rs-8426574/v1), 2026-02-02
Supplement: Supplementary file 133 [file 动态报告-张可云-20250226143523.pdf › Plantar pressure and gait analysis/soccer/动态报告-张可云-20250226143523.pdf]

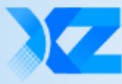

左右脚动态数据

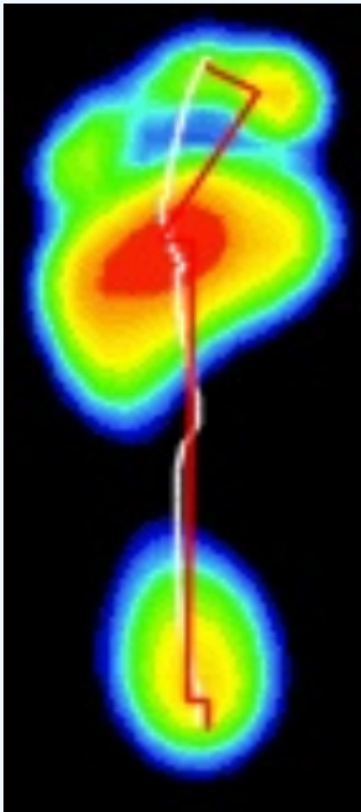

| 第2步      | Cop数据     | 第1步      |
|----------|-----------|----------|
| 217.79   | cop距离【mm】 | 229.75   |
| 4.23     | 步偏脚【°】    | -3.63    |
| 9710.78  | 面积【mm²】   | 7991.11  |
| 24168.26 | 压力【kgf】   | 19577.15 |
| 2.31     | 压强【gr/%】  | 2.27     |
| 35675.70 | 最大压力【kgf】 | 33266.61 |
| 0.21     | 速度【mm/ms】 | 0.24     |

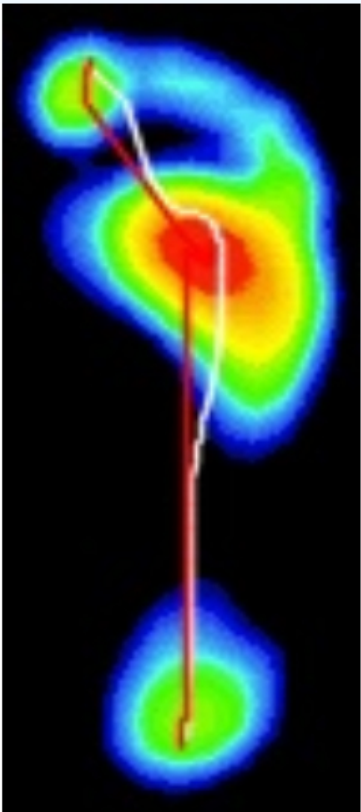

支撑相

左脚

|             |          |
|-------------|----------|
| ● 着地期 11%   |          |
| 时长【ms】      | 120.00   |
| 平均速度【mm/ms】 | 0.12     |
| 最大面积【mm²】   | 3593.25  |
| 最大压力【kgf】   | 8826.34  |
| ● 平足期 76%   |          |
| 时长【ms】      | 790.00   |
| 平均速度【mm/ms】 | 0.20     |
| 最大面积【mm²】   | 14898.94 |
| 最大压力【kgf】   | 36757.21 |
| ● 蹬伸期 13%   |          |
| 时长【ms】      | 135.00   |
| 平均速度【mm/ms】 | 0.27     |
| 最大面积【mm²】   | 6422.06  |
| 最大压力【kgf】   | 14702.81 |

右脚

|             |          |
|-------------|----------|
| ● 着地期 13%   |          |
| 时长【ms】      | 100.00   |
| 平均速度【mm/ms】 | 0.12     |
| 最大面积【mm²】   | 3727.80  |
| 最大压力【kgf】   | 9168.92  |
| ● 平足期 74%   |          |
| 时长【ms】      | 640.00   |
| 平均速度【mm/ms】 | 0.24     |
| 最大面积【mm²】   | 12621.15 |
| 最大压力【kgf】   | 32685.03 |
| ● 蹬伸期 17%   |          |
| 时长【ms】      | 165.00   |
| 平均速度【mm/ms】 | 0.34     |
| 最大面积【mm²】   | 7525.69  |
| 最大压力【kgf】   | 18603.51 |

内外翻

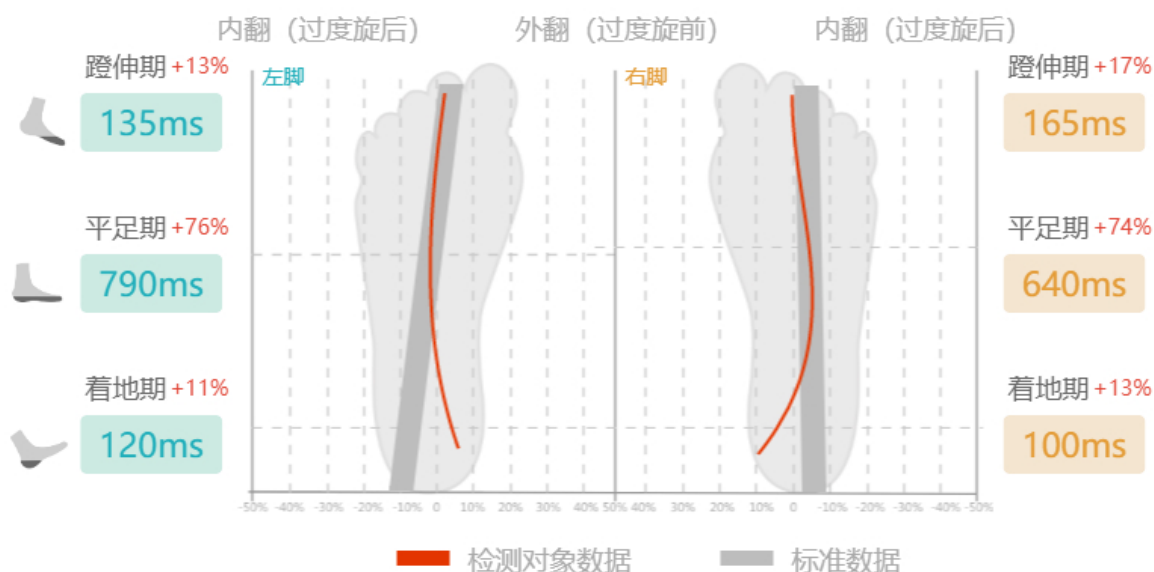

足弓类型

左脚

足弓指数 33.80%

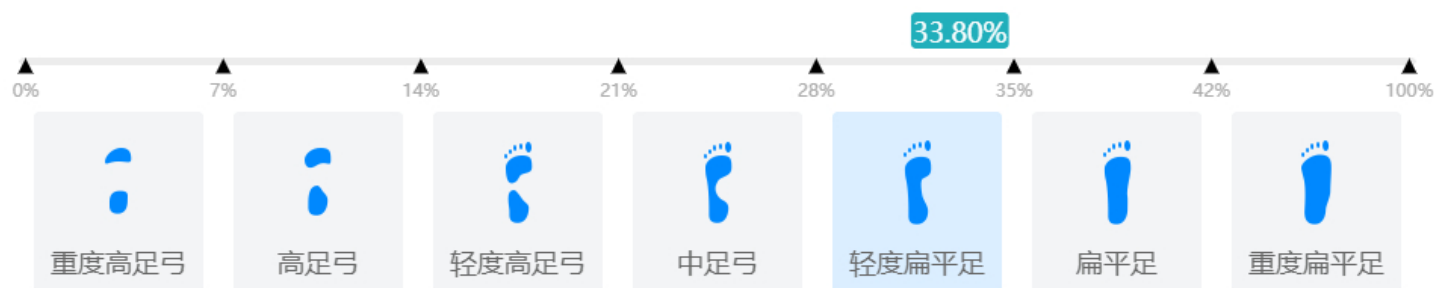

右脚

足弓指数 28.28%

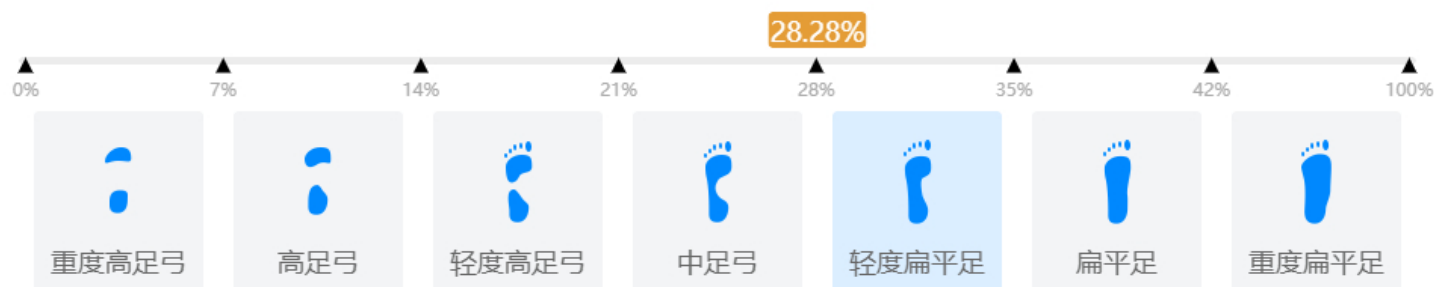

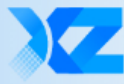

报告结论
