# Supplementary material for: Individualized Corrective Training Based on Precision Biomechanical Assessment for the Prevention of Sports Injuries in Adolescents
Source: Research Square preprint supplement (doi:10.21203/rs.3.rs-8426574/v1), 2026-02-02
Supplement: Supplementary file 134 [file 动态报告-张文雅-20250226132115.pdf › Plantar pressure and gait analysis/soccer/动态报告-张文雅-20250226132115.pdf]

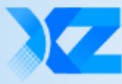

左右脚动态数据

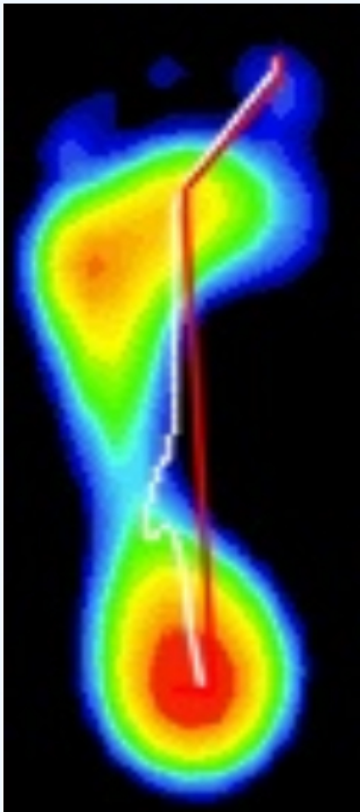

| 第2步      | Cop数据     | 第1步      |
|----------|-----------|----------|
| 206.00   | cop距离【mm】 | 141.29   |
| 2.82     | 步偏脚【°】    | 4.16     |
| 9349.63  | 面积【mm²】   | 9857.98  |
| 25231.38 | 压力【kgf】   | 26774.48 |
| 2.53     | 压强【gr/%】  | 2.52     |
| 37817.59 | 最大压力【kgf】 | 39780.77 |
| 0.19     | 速度【mm/ms】 | 0.16     |

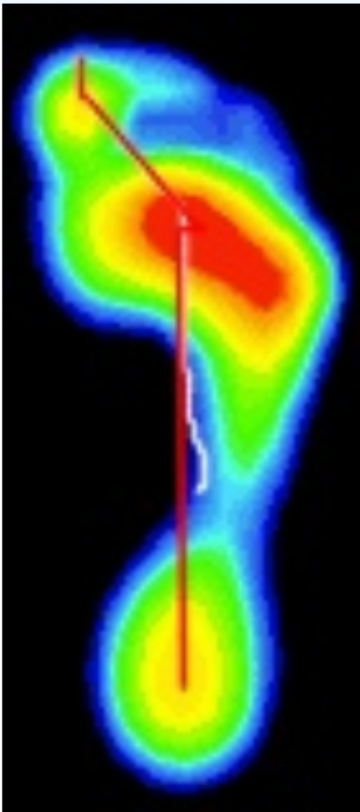

支撑相

左脚

|             |          |
|-------------|----------|
| ● 着地期 4%    |          |
| 时长【ms】      | 35.00    |
| 平均速度【mm/ms】 | 0.14     |
| 最大面积【mm²】   | 1932.19  |
| 最大压力【kgf】   | 2080.38  |
| ● 平足期 87%   |          |
| 时长【ms】      | 816.00   |
| 平均速度【mm/ms】 | 0.16     |
| 最大面积【mm²】   | 13424.40 |
| 最大压力【kgf】   | 36145.84 |
| ● 蹬伸期 10%   |          |
| 时长【ms】      | 92.00    |
| 平均速度【mm/ms】 | 0.38     |
| 最大面积【mm²】   | 4588.20  |
| 最大压力【kgf】   | 7135.41  |

右脚

|             |          |
|-------------|----------|
| ● 着地期 3%    |          |
| 时长【ms】      | 26.67    |
| 平均速度【mm/ms】 | 0.02     |
| 最大面积【mm²】   | 999.75   |
| 最大压力【kgf】   | 673.45   |
| ● 平足期 90%   |          |
| 时长【ms】      | 920.00   |
| 平均速度【mm/ms】 | 0.18     |
| 最大面积【mm²】   | 13657.50 |
| 最大压力【kgf】   | 36664.48 |
| ● 蹬伸期 11%   |          |
| 时长【ms】      | 108.00   |
| 平均速度【mm/ms】 | 0.27     |
| 最大面积【mm²】   | 4184.55  |
| 最大压力【kgf】   | 6308.22  |

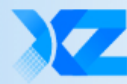

内外翻

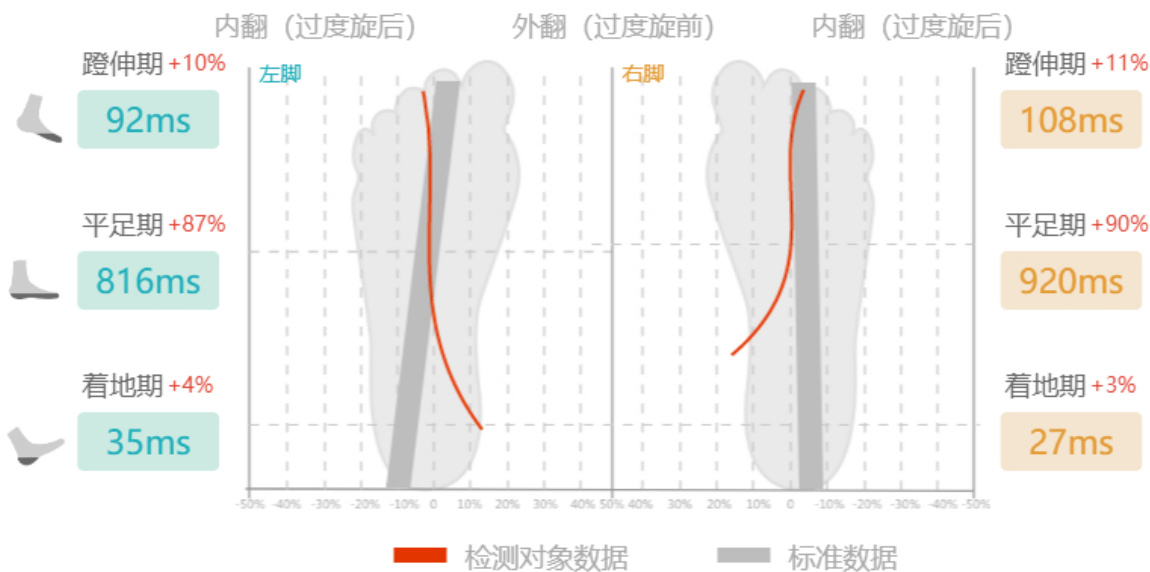

足弓类型

左脚

足弓指数 27.52%

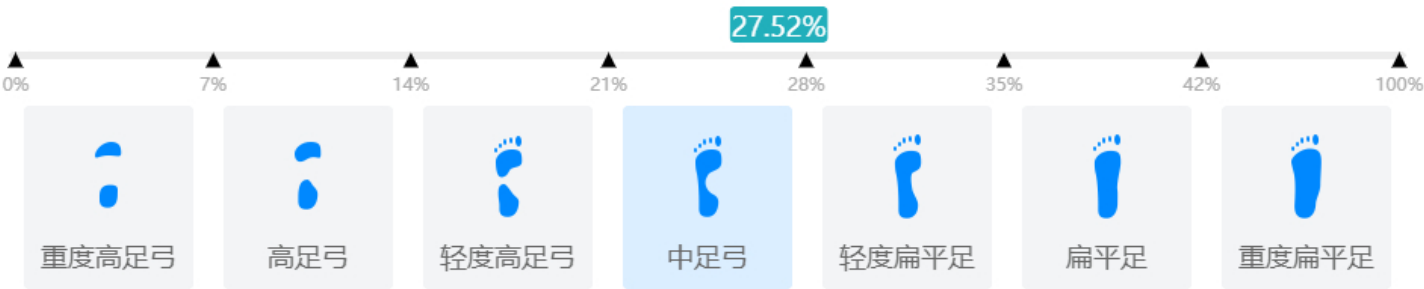

右脚

足弓指数 27.24%

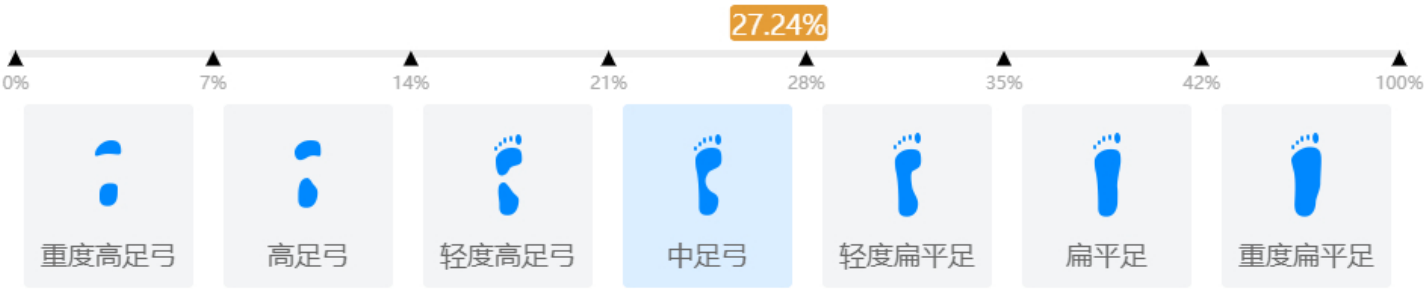

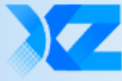

报告结论
