# Supplementary material for: Individualized Corrective Training Based on Precision Biomechanical Assessment for the Prevention of Sports Injuries in Adolescents
Source: Research Square preprint supplement (doi:10.21203/rs.3.rs-8426574/v1), 2026-02-02
Supplement: Supplementary file 135 [file 动态报告-张旭博-20250226114909.pdf › Plantar pressure and gait analysis/soccer/动态报告-张旭博-20250226114909.pdf]

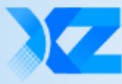

左右脚动态数据

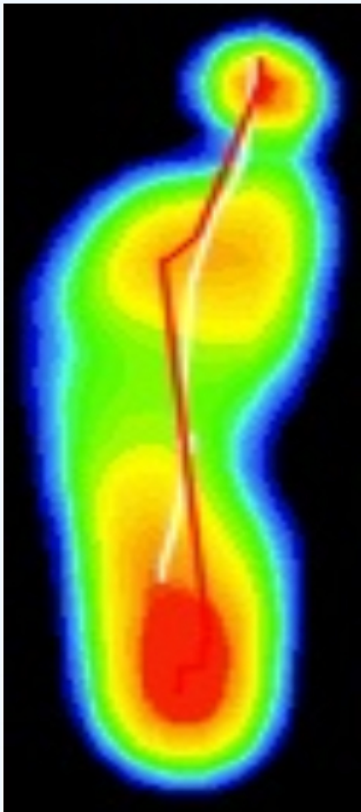

| 第5步      | Cop数据     | 第1步      |
|----------|-----------|----------|
| 218.36   | cop距离【mm】 | 203.52   |
| 1.93     | 步偏脚【°】    | 8.06     |
| 12959.37 | 面积【mm²】   | 12066.34 |
| 31672.79 | 压力【kgf】   | 31434.92 |
| 2.16     | 压强【gr/%】  | 2.46     |
| 47395.19 | 最大压力【kgf】 | 48275.12 |
| 0.25     | 速度【mm/ms】 | 0.23     |

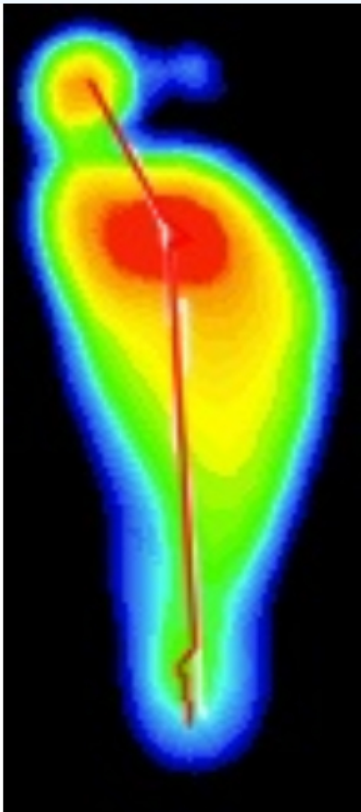

支撑相

左脚

|             |          |
|-------------|----------|
| ● 着地期 4%    |          |
| 时长【ms】      | 45.00    |
| 平均速度【mm/ms】 | 0.07     |
| 最大面积【mm²】   | 2875.50  |
| 最大压力【kgf】   | 4494.11  |
| ● 平足期 79%   |          |
| 时长【ms】      | 785.00   |
| 平均速度【mm/ms】 | 0.18     |
| 最大面积【mm²】   | 16274.81 |
| 最大压力【kgf】   | 46910.79 |
| ● 蹬伸期 16%   |          |
| 时长【ms】      | 160.00   |
| 平均速度【mm/ms】 | 0.34     |
| 最大面积【mm²】   | 7698.38  |
| 最大压力【kgf】   | 18757.21 |

右脚

|             |          |
|-------------|----------|
| ● 着地期 8%    |          |
| 时长【ms】      | 40.00    |
| 平均速度【mm/ms】 | 0.07     |
| 最大面积【mm²】   | 3080.63  |
| 最大压力【kgf】   | 4617.77  |
| ● 平足期 79%   |          |
| 时长【ms】      | 660.00   |
| 平均速度【mm/ms】 | 0.22     |
| 最大面积【mm²】   | 15227.63 |
| 最大压力【kgf】   | 42984.50 |
| ● 蹬伸期 15%   |          |
| 时长【ms】      | 140.00   |
| 平均速度【mm/ms】 | 0.32     |
| 最大面积【mm²】   | 8108.55  |
| 最大压力【kgf】   | 20765.10 |

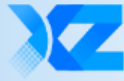

内外翻

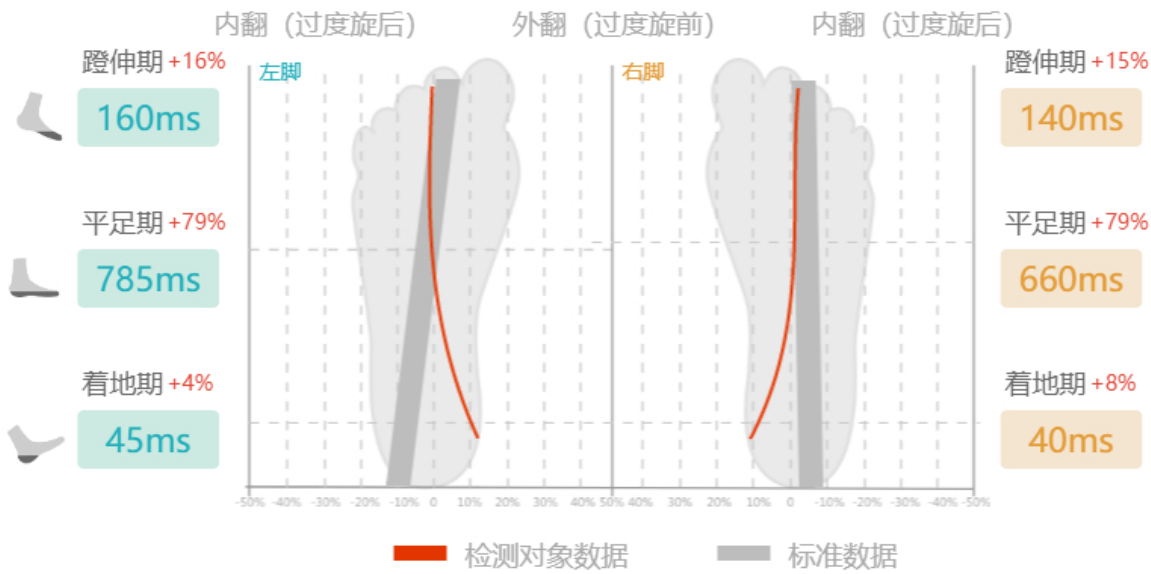

足弓类型

左脚

足弓指数 36.72%

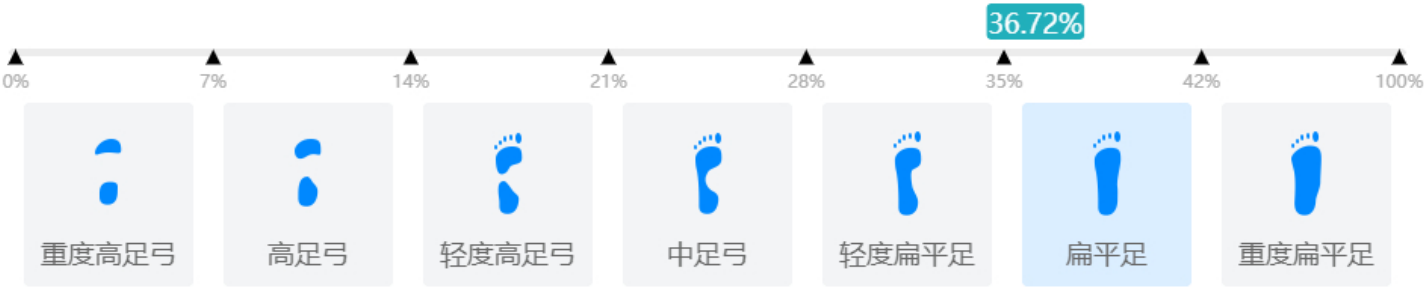

右脚

足弓指数 42.58%

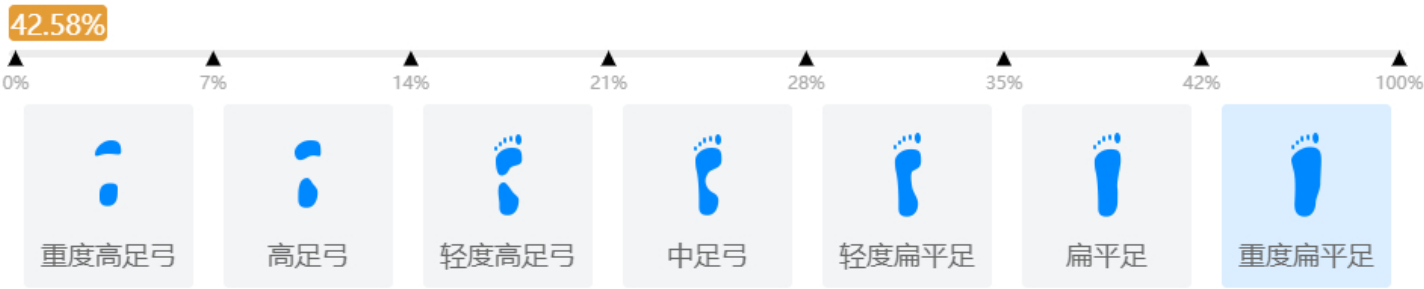

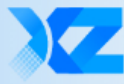

报告结论
