# Supplementary material for: Individualized Corrective Training Based on Precision Biomechanical Assessment for the Prevention of Sports Injuries in Adolescents
Source: Research Square preprint supplement (doi:10.21203/rs.3.rs-8426574/v1), 2026-02-02
Supplement: Supplementary file 136 [file 动态报告-曾颖雯-20250226124415.pdf › Plantar pressure and gait analysis/soccer/动态报告-曾颖雯-20250226124415.pdf]

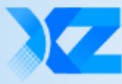

左右脚动态数据

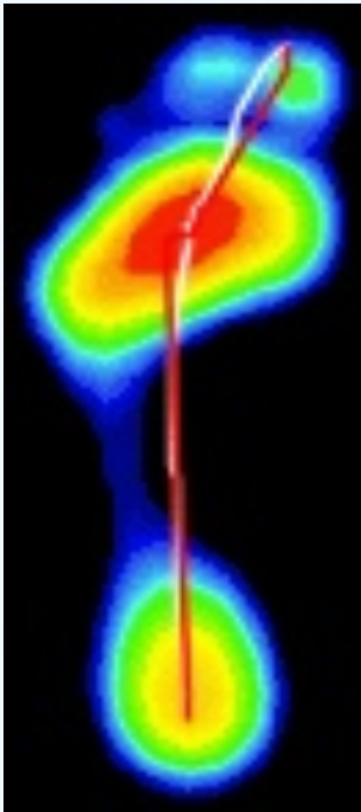

| 第2步      | Cop数据     | 第1步      |
|----------|-----------|----------|
| 199.70   | cop距离【mm】 | 182.03   |
| 0.86     | 步偏脚【°】    | 0.26     |
| 6915.68  | 面积【mm²】   | 8359.63  |
| 15881.99 | 压力【kgf】   | 18243.10 |
| 2.10     | 压强【gr/%】  | 2.02     |
| 25863.49 | 最大压力【kgf】 | 27470.77 |
| 0.23     | 速度【mm/ms】 | 0.22     |

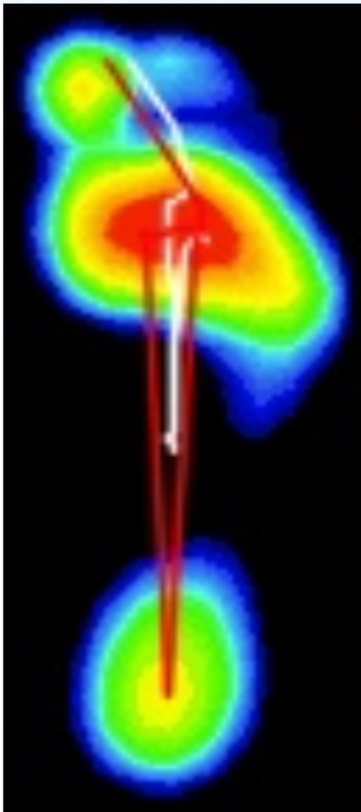

支撑相

左脚

|             |          |
|-------------|----------|
| ● 着地期 13%   |          |
| 时长【ms】      | 116.00   |
| 平均速度【mm/ms】 | 0.12     |
| 最大面积【mm²】   | 3707.10  |
| 最大压力【kgf】   | 7100.96  |
| ● 平足期 73%   |          |
| 时长【ms】      | 660.00   |
| 平均速度【mm/ms】 | 0.19     |
| 最大面积【mm²】   | 11712.15 |
| 最大压力【kgf】   | 26036.68 |
| ● 蹬伸期 15%   |          |
| 时长【ms】      | 132.00   |
| 平均速度【mm/ms】 | 0.36     |
| 最大面积【mm²】   | 6271.20  |
| 最大压力【kgf】   | 13544.82 |

右脚

|             |          |
|-------------|----------|
| ● 着地期 11%   |          |
| 时长【ms】      | 108.00   |
| 平均速度【mm/ms】 | 0.12     |
| 最大面积【mm²】   | 3690.90  |
| 最大压力【kgf】   | 6865.61  |
| ● 平足期 76%   |          |
| 时长【ms】      | 720.00   |
| 平均速度【mm/ms】 | 0.17     |
| 最大面积【mm²】   | 11415.15 |
| 最大压力【kgf】   | 27390.82 |
| ● 蹬伸期 13%   |          |
| 时长【ms】      | 124.00   |
| 平均速度【mm/ms】 | 0.42     |
| 最大面积【mm²】   | 6140.70  |
| 最大压力【kg/f】  | 14137.76 |

内外翻

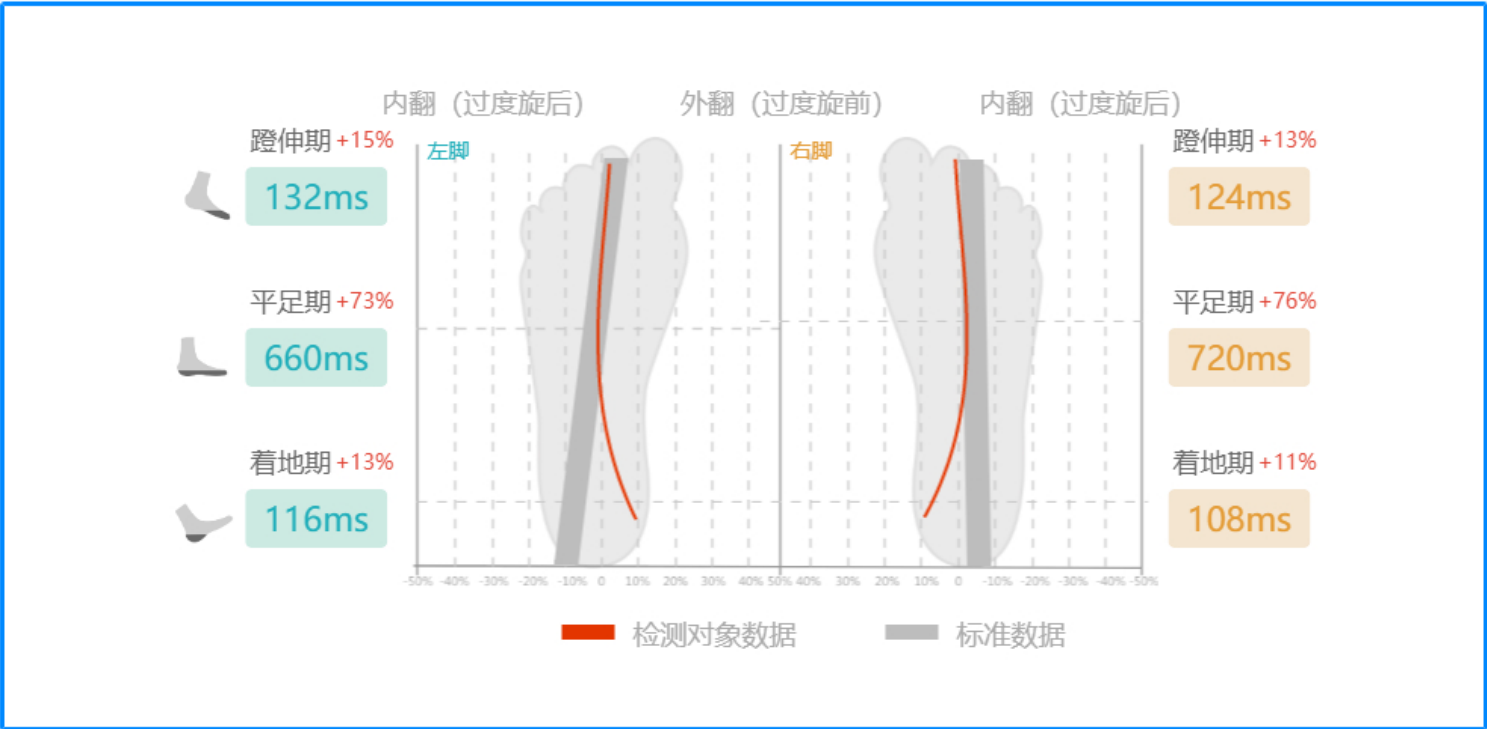

足弓类型

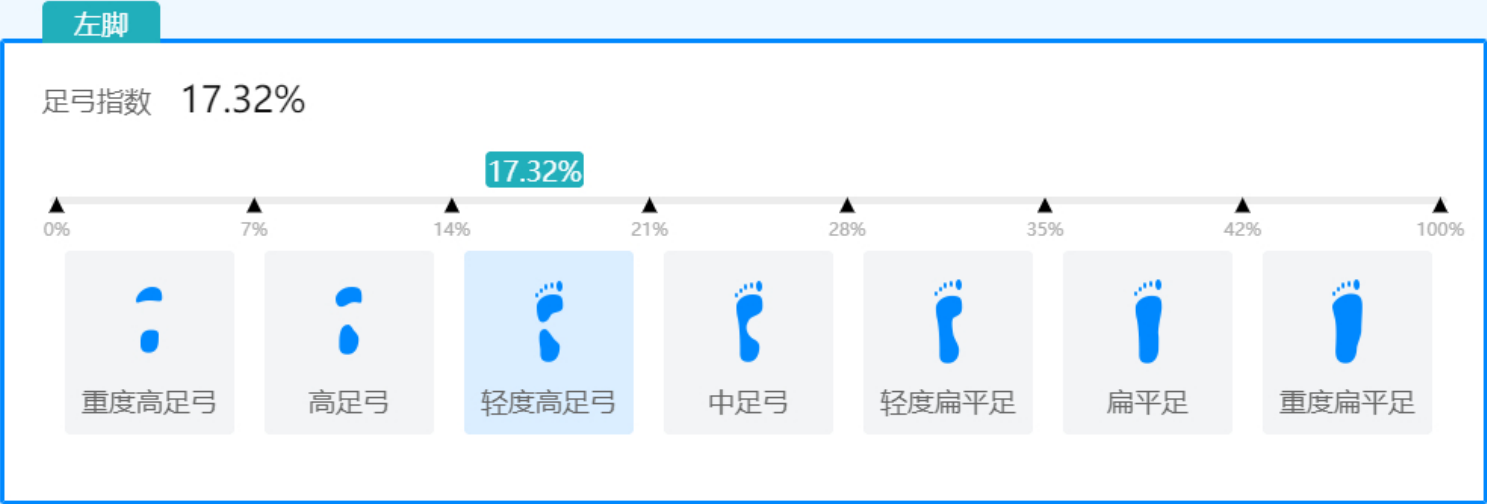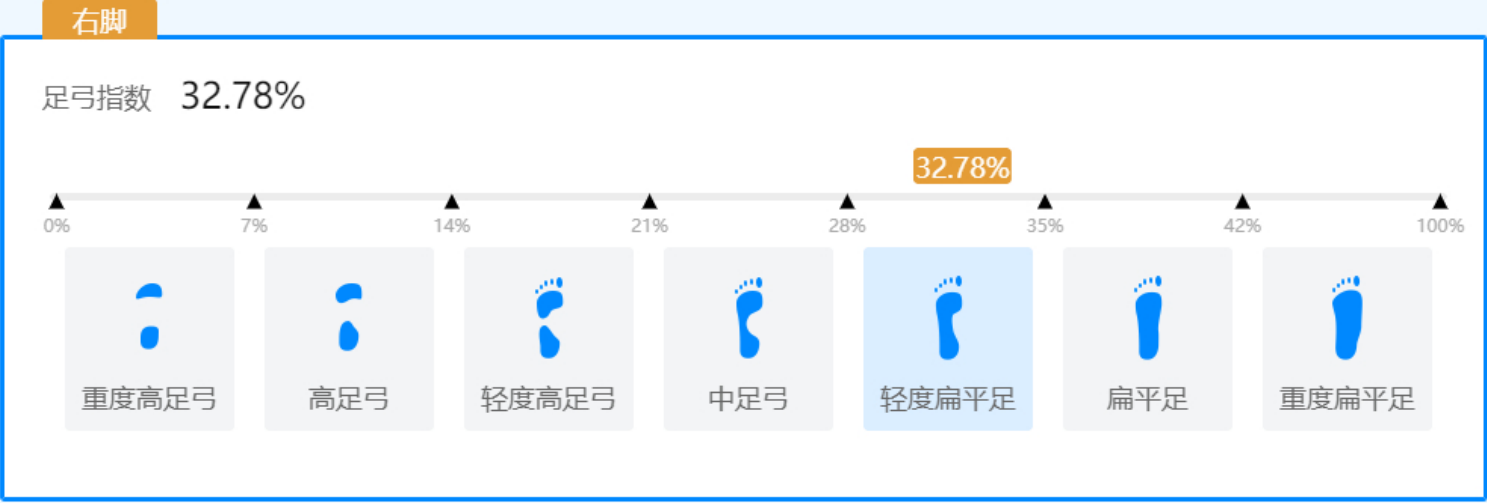

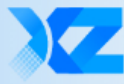

报告结论
