# Supplementary material for: Individualized Corrective Training Based on Precision Biomechanical Assessment for the Prevention of Sports Injuries in Adolescents
Source: Research Square preprint supplement (doi:10.21203/rs.3.rs-8426574/v1), 2026-02-02
Supplement: Supplementary file 137 [file 动态报告-李冰冰-20250226144603.pdf › Plantar pressure and gait analysis/soccer/动态报告-李冰冰-20250226144603.pdf]

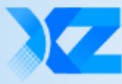

左右脚动态数据

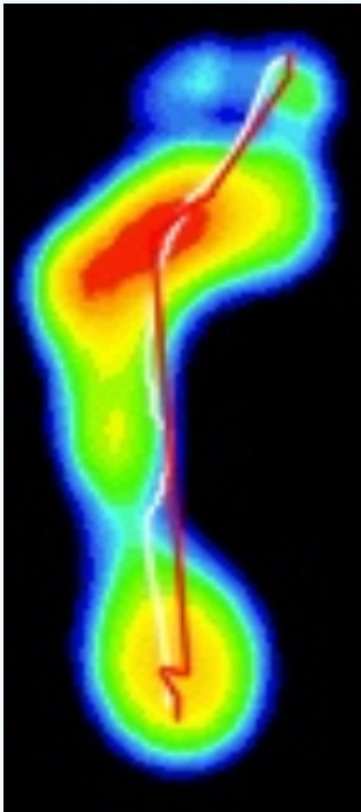

| 第2步      | Cop数据     | 第1步      |
|----------|-----------|----------|
| 224.50   | cop距离【mm】 | 209.78   |
| 8.82     | 步偏脚【°】    | 2.48     |
| 9745.38  | 面积【mm²】   | 9146.09  |
| 27964.67 | 压力【kgf】   | 26111.33 |
| 2.70     | 压强【gr/%】  | 2.67     |
| 42530.37 | 最大压力【kgf】 | 45065.64 |
| 0.21     | 速度【mm/ms】 | 0.18     |

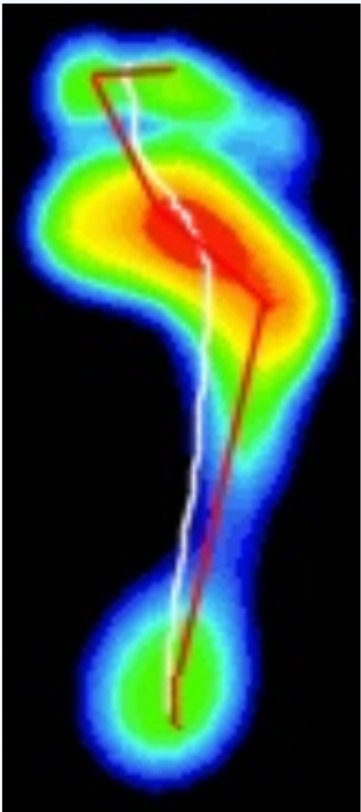

支撑相

左脚

|             |          |
|-------------|----------|
| ● 着地期 8%    |          |
| 时长【ms】      | 68.00    |
| 平均速度【mm/ms】 | 0.12     |
| 最大面积【mm²】   | 3423.60  |
| 最大压力【kgf】   | 8770.29  |
| ● 平足期 84%   |          |
| 时长【ms】      | 792.00   |
| 平均速度【mm/ms】 | 0.16     |
| 最大面积【mm²】   | 13715.55 |
| 最大压力【kgf】   | 40756.67 |
| ● 蹬伸期 10%   |          |
| 时长【ms】      | 110.00   |
| 平均速度【mm/ms】 | 0.38     |
| 最大面积【mm²】   | 5147.44  |
| 最大压力【kgf】   | 8698.45  |

右脚

|             |          |
|-------------|----------|
| ● 着地期 5%    |          |
| 时长【ms】      | 56.00    |
| 平均速度【mm/ms】 | 0.08     |
| 最大面积【mm²】   | 3457.80  |
| 最大压力【kgf】   | 7172.66  |
| ● 平足期 87%   |          |
| 时长【ms】      | 944.00   |
| 平均速度【mm/ms】 | 0.17     |
| 最大面积【mm²】   | 15083.55 |
| 最大压力【kgf】   | 45141.59 |
| ● 蹬伸期 8%    |          |
| 时长【ms】      | 88.00    |
| 平均速度【mm/ms】 | 0.32     |
| 最大面积【mm²】   | 4303.35  |
| 最大压力【kg/f】  | 6050.50  |

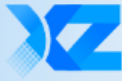

内外翻

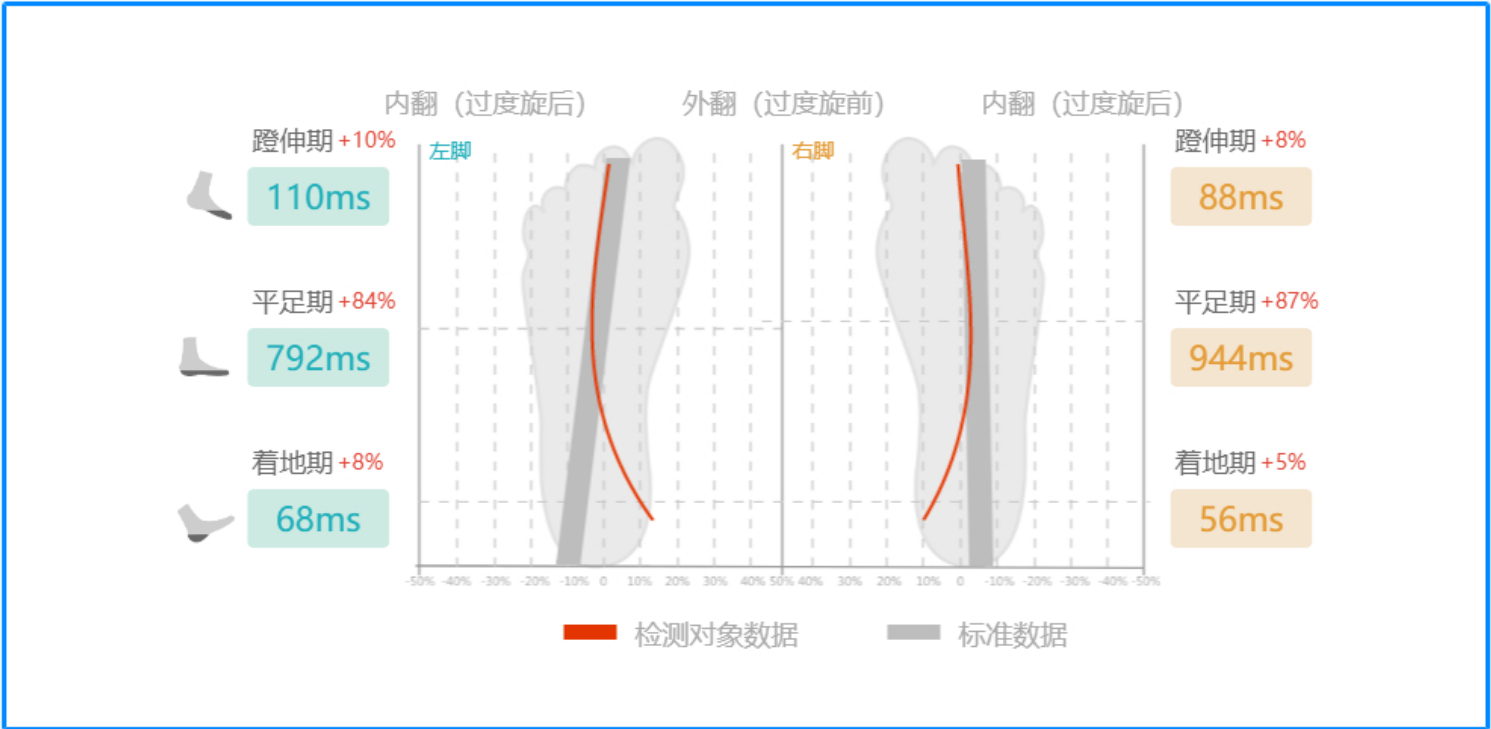

足弓类型

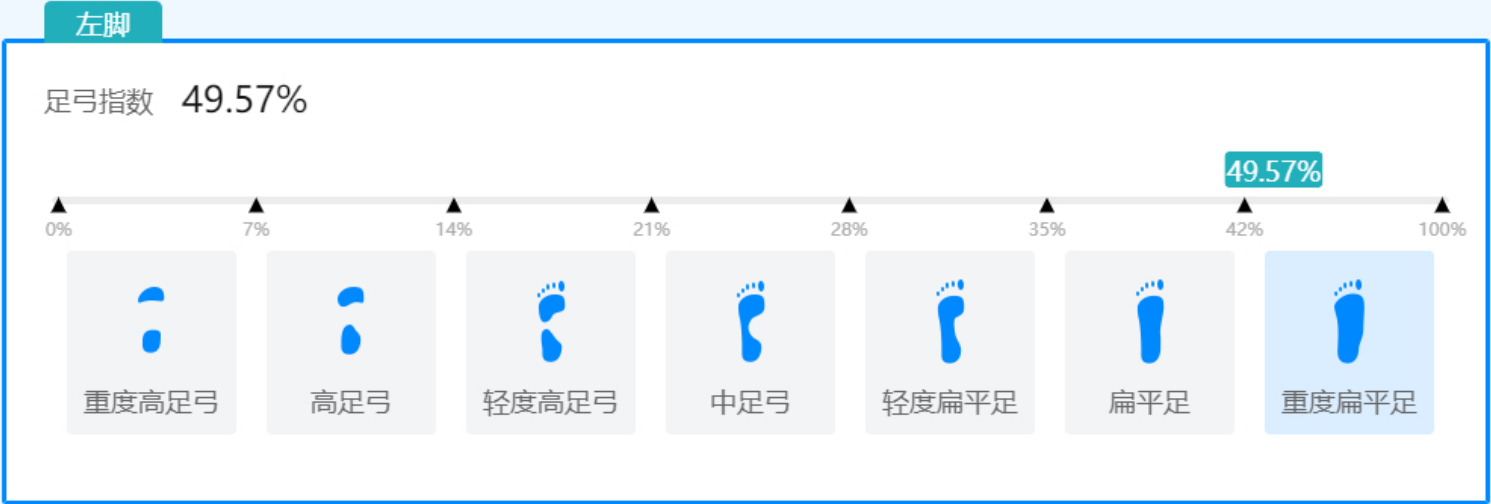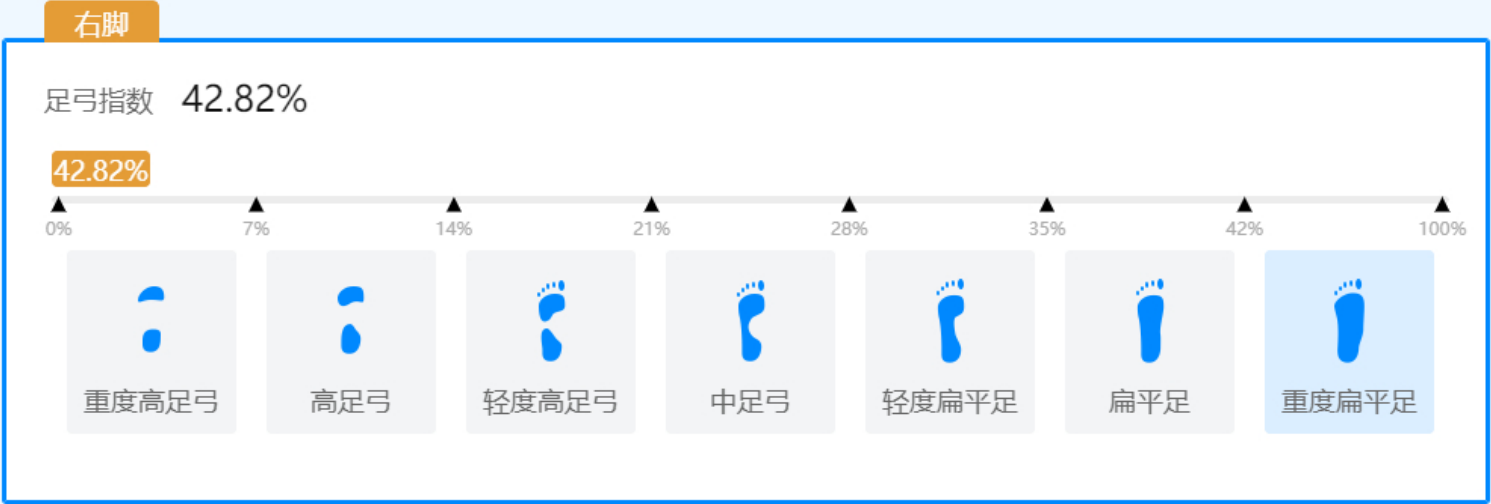

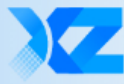

报告结论
