# Supplementary material for: Individualized Corrective Training Based on Precision Biomechanical Assessment for the Prevention of Sports Injuries in Adolescents
Source: Research Square preprint supplement (doi:10.21203/rs.3.rs-8426574/v1), 2026-02-02
Supplement: Supplementary file 138 [file 动态报告-林茜-20250226093430.pdf › Plantar pressure and gait analysis/soccer/动态报告-林茜-20250226093430.pdf]

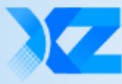

左右脚动态数据

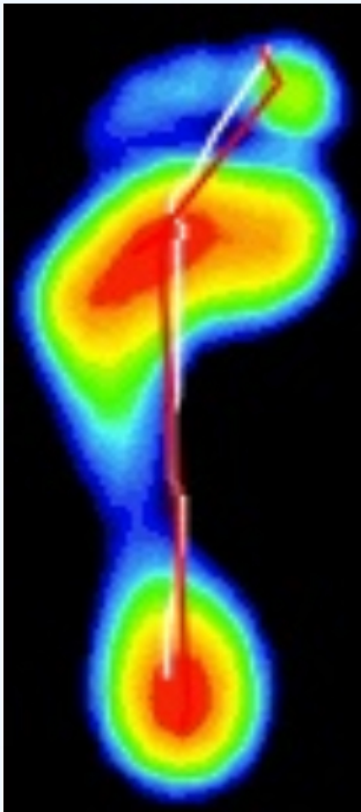

| 第2步      | Cop数据     | 第1步      |
|----------|-----------|----------|
| 203.15   | cop距离【mm】 | 202.47   |
| 10.62    | 步偏脚【°】    | 16.73    |
| 8529.60  | 面积【mm²】   | 7984.38  |
| 18665.72 | 压力【kgf】   | 18018.83 |
| 2.00     | 压强【gr/%】  | 2.04     |
| 30679.19 | 最大压力【kgf】 | 29096.07 |
| 0.23     | 速度【mm/ms】 | 0.26     |

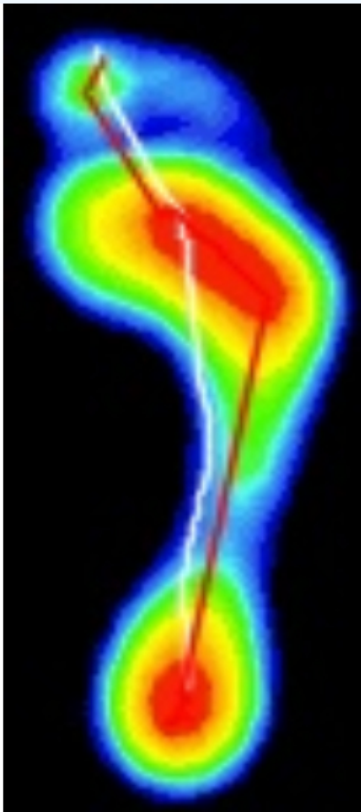

支撑相

左脚

|             |          |
|-------------|----------|
| ● 着地期 9%    |          |
| 时长【ms】      | 80.00    |
| 平均速度【mm/ms】 | 0.14     |
| 最大面积【mm²】   | 2718.75  |
| 最大压力【kgf】   | 5509.01  |
| ● 平足期 84%   |          |
| 时长【ms】      | 805.00   |
| 平均速度【mm/ms】 | 0.20     |
| 最大面积【mm²】   | 13036.50 |
| 最大压力【kgf】   | 29972.69 |
| ● 蹬伸期 9%    |          |
| 时长【ms】      | 85.00    |
| 平均速度【mm/ms】 | 0.39     |
| 最大面积【mm²】   | 4463.44  |
| 最大压力【kgf】   | 7487.27  |

右脚

|             |          |
|-------------|----------|
| ● 着地期 10%   |          |
| 时长【ms】      | 88.00    |
| 平均速度【mm/ms】 | 0.06     |
| 最大面积【mm²】   | 2521.35  |
| 最大压力【kgf】   | 5067.32  |
| ● 平足期 83%   |          |
| 时长【ms】      | 728.00   |
| 平均速度【mm/ms】 | 0.22     |
| 最大面积【mm²】   | 12555.90 |
| 最大压力【kgf】   | 28691.59 |
| ● 蹬伸期 8%    |          |
| 时长【ms】      | 68.00    |
| 平均速度【mm/ms】 | 0.31     |
| 最大面积【mm²】   | 3610.80  |
| 最大压力【kgf】   | 4087.20  |

内外翻

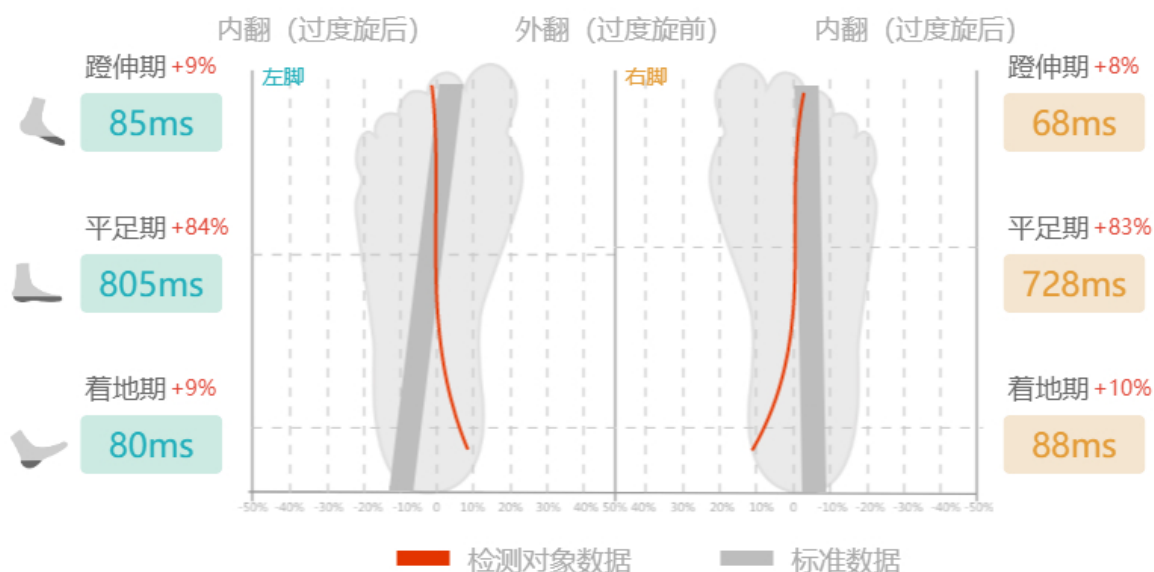

足弓类型

左脚

足弓指数 57.24%

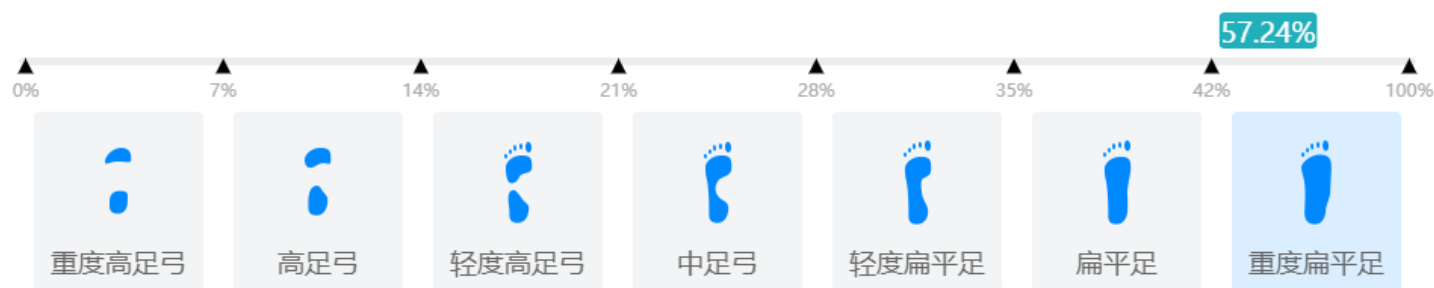

右脚

足弓指数 38.55%

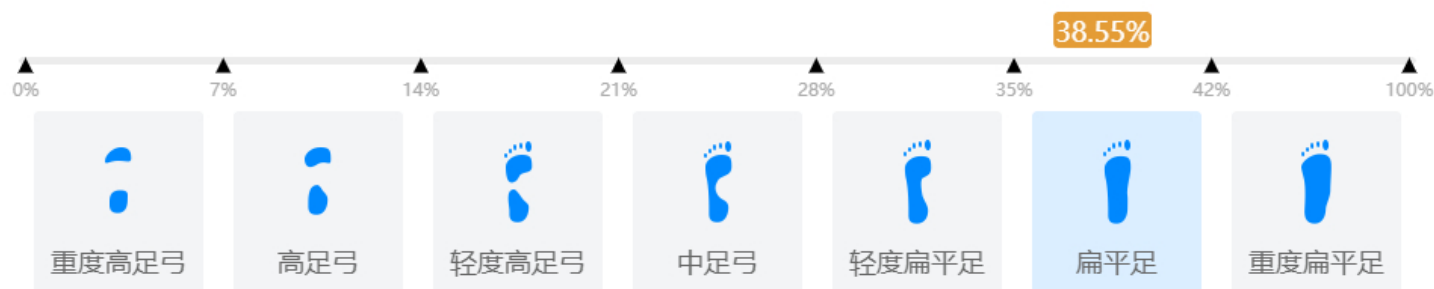

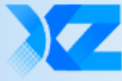

报告结论
