# Supplementary material for: Individualized Corrective Training Based on Precision Biomechanical Assessment for the Prevention of Sports Injuries in Adolescents
Source: Research Square preprint supplement (doi:10.21203/rs.3.rs-8426574/v1), 2026-02-02
Supplement: Supplementary file 139 [file 动态报告-柳丹琦-20250226120243.pdf › Plantar pressure and gait analysis/soccer/动态报告-柳丹琦-20250226120243.pdf]

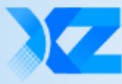

左右脚动态数据

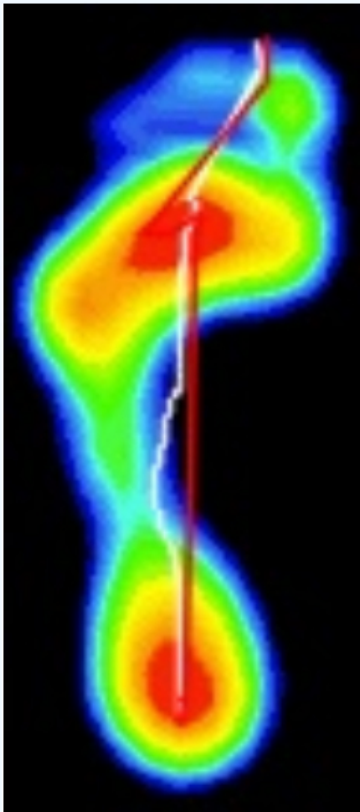

| 第2步      | Cop数据     | 第1步      |
|----------|-----------|----------|
| 210.66   | cop距离【mm】 | 211.03   |
| 4.99     | 步偏脚【°】    | 9.87     |
| 9986.83  | 面积【mm²】   | 8899.57  |
| 24471.17 | 压力【kgf】   | 21086.49 |
| 2.29     | 压强【gr/%】  | 2.15     |
| 36435.71 | 最大压力【kgf】 | 35832.74 |
| 0.21     | 速度【mm/ms】 | 0.24     |

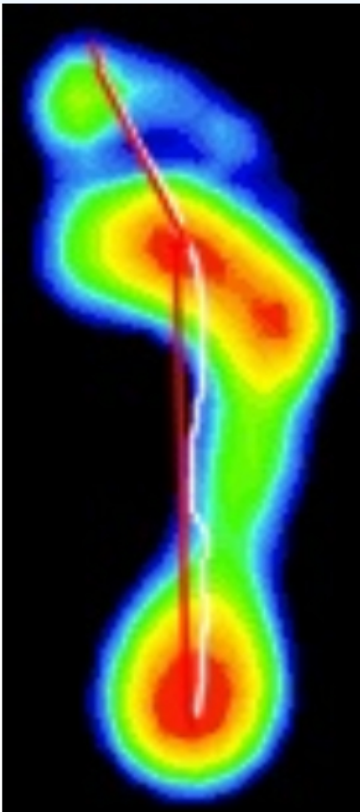

支撑相

| 左脚          |          |
|-------------|----------|
| ● 着地期 11%   |          |
| 时长【ms】      | 105.00   |
| 平均速度【mm/ms】 | 0.11     |
| 最大面积【mm²】   | 3313.13  |
| 最大压力【kgf】   | 8395.50  |
| ● 平足期 83%   |          |
| 时长【ms】      | 800.00   |
| 平均速度【mm/ms】 | 0.18     |
| 最大面积【mm²】   | 13862.81 |
| 最大压力【kgf】   | 35733.48 |
| ● 蹬伸期 7%    |          |
| 时长【ms】      | 65.00    |
| 平均速度【mm/ms】 | 0.51     |
| 最大面积【mm²】   | 3535.31  |
| 最大压力【kgf】   | 4943.70  |

| 右脚          |          |
|-------------|----------|
| ● 着地期 11%   |          |
| 时长【ms】      | 104.00   |
| 平均速度【mm/ms】 | 0.09     |
| 最大面积【mm²】   | 3050.10  |
| 最大压力【kgf】   | 6326.10  |
| ● 平足期 82%   |          |
| 时长【ms】      | 764.00   |
| 平均速度【mm/ms】 | 0.20     |
| 最大面积【mm²】   | 14391.45 |
| 最大压力【kgf】   | 38062.34 |
| ● 蹬伸期 8%    |          |
| 时长【ms】      | 72.00    |
| 平均速度【mm/ms】 | 0.36     |
| 最大面积【mm²】   | 3410.10  |
| 最大压力【kg/f】  | 5911.42  |

内外翻

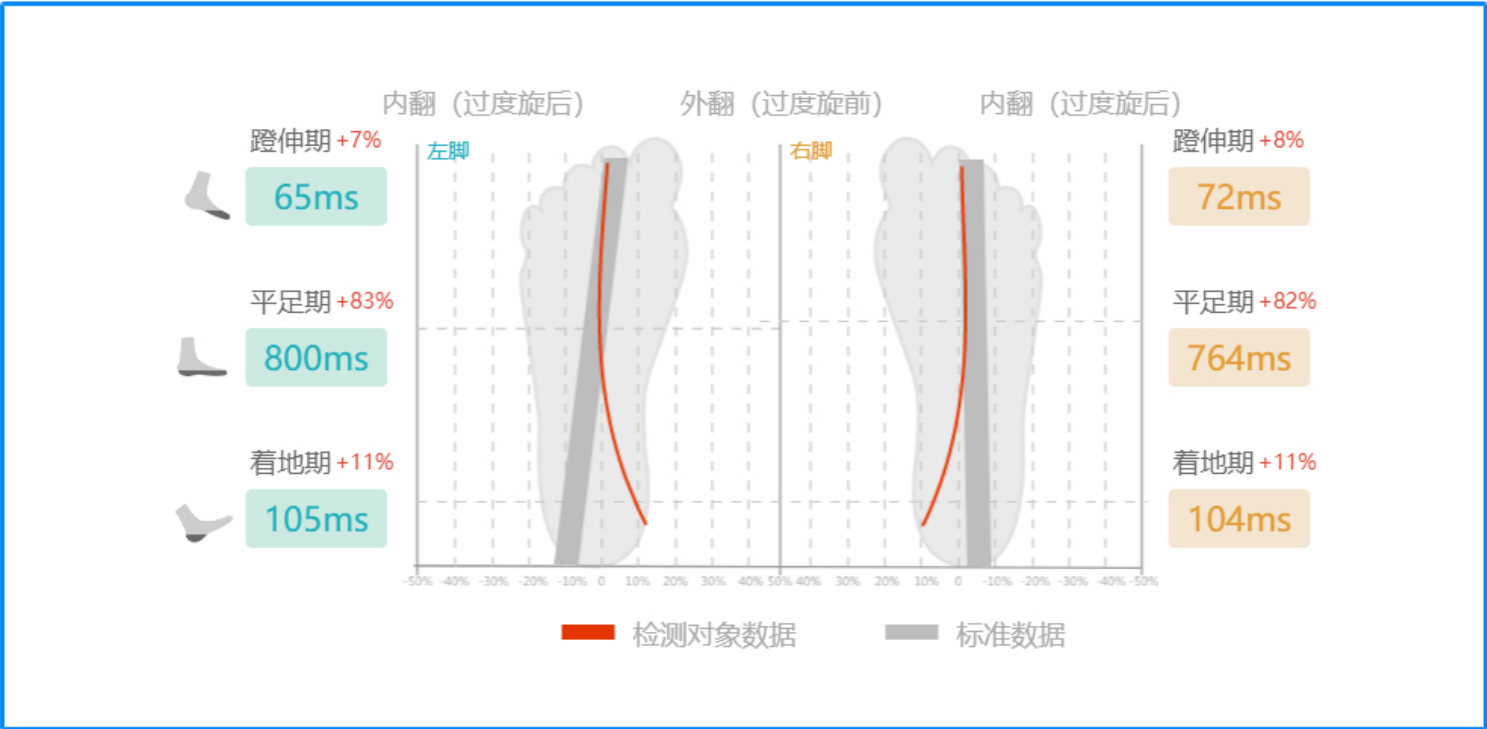

足弓类型

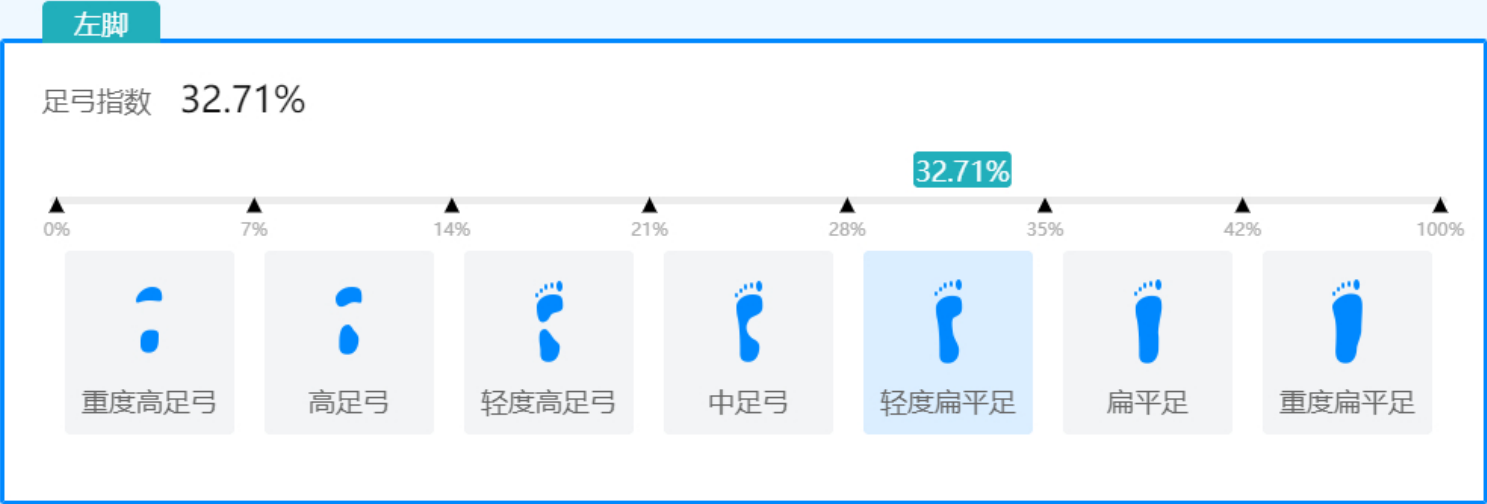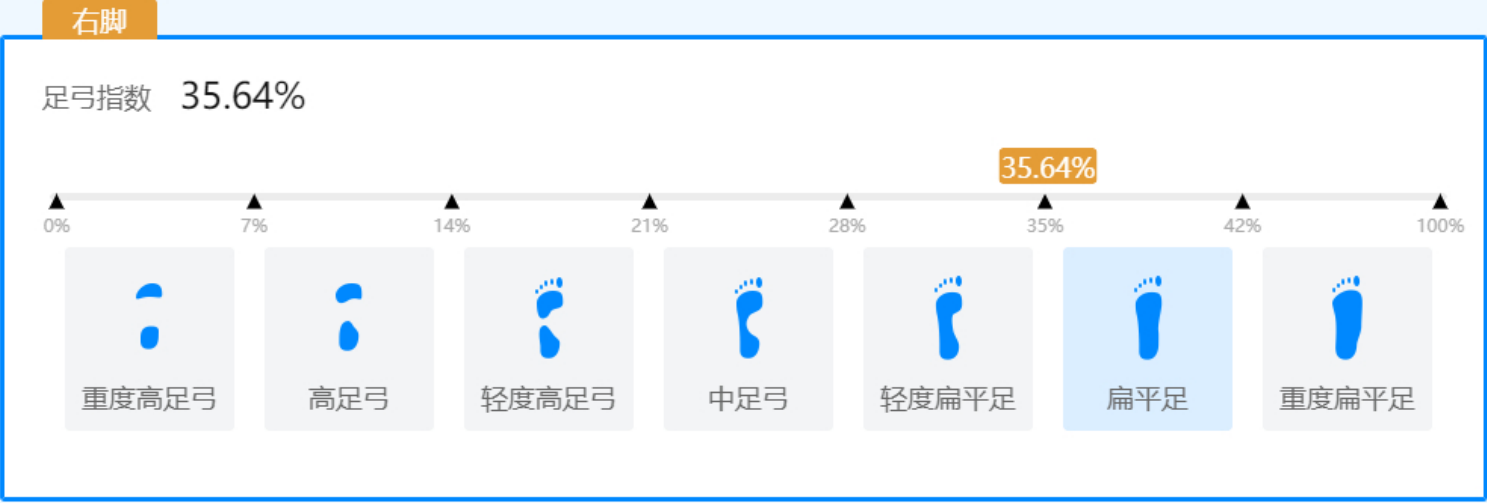

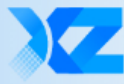

报告结论
