# Supplementary material for: Individualized Corrective Training Based on Precision Biomechanical Assessment for the Prevention of Sports Injuries in Adolescents
Source: Research Square preprint supplement (doi:10.21203/rs.3.rs-8426574/v1), 2026-02-02
Supplement: Supplementary file 140 [file 动态报告-梁栋-20250226110143.pdf › Plantar pressure and gait analysis/soccer/动态报告-梁栋-20250226110143.pdf]

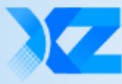

左右脚动态数据

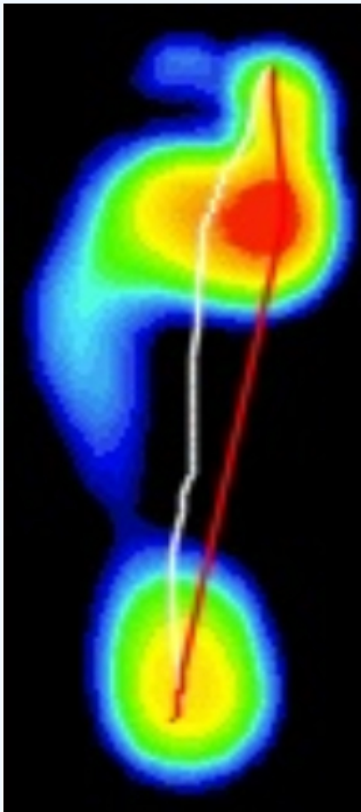

| 第1步      | Cop数据     | 第3步      |
|----------|-----------|----------|
| 207.05   | cop距离【mm】 | 225.42   |
| 6.10     | 步偏脚【°】    | 8.46     |
| 9178.03  | 面积【mm²】   | 10187.33 |
| 23157.78 | 压力【kgf】   | 27264.56 |
| 2.37     | 压强【gr/%】  | 2.44     |
| 39893.59 | 最大压力【kgf】 | 42028.32 |
| 0.26     | 速度【mm/ms】 | 0.26     |

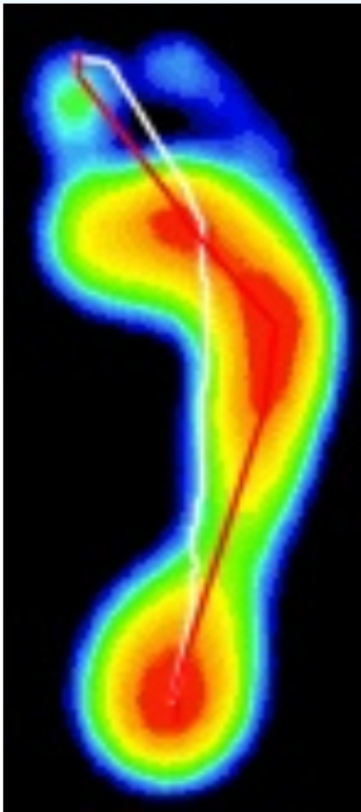

支撑相

左脚

|             |          |
|-------------|----------|
| ● 着地期 7%    |          |
| 时长【ms】      | 66.67    |
| 平均速度【mm/ms】 | 0.08     |
| 最大面积【mm²】   | 3972.38  |
| 最大压力【kgf】   | 10799.77 |
| ● 平足期 75%   |          |
| 时长【ms】      | 683.33   |
| 平均速度【mm/ms】 | 0.23     |
| 最大面积【mm²】   | 15361.88 |
| 最大压力【kgf】   | 43172.75 |
| ● 蹬伸期 17%   |          |
| 时长【ms】      | 153.33   |
| 平均速度【mm/ms】 | 0.27     |
| 最大面积【mm²】   | 7998.75  |
| 最大压力【kgf】   | 21985.74 |

右脚

|             |          |
|-------------|----------|
| ● 着地期 5%    |          |
| 时长【ms】      | 46.67    |
| 平均速度【mm/ms】 | 0.08     |
| 最大面积【mm²】   | 3358.50  |
| 最大压力【kgf】   | 6651.15  |
| ● 平足期 76%   |          |
| 时长【ms】      | 733.33   |
| 平均速度【mm/ms】 | 0.21     |
| 最大面积【mm²】   | 14601.75 |
| 最大压力【kgf】   | 41192.66 |
| ● 蹬伸期 20%   |          |
| 时长【ms】      | 193.33   |
| 平均速度【mm/ms】 | 0.29     |
| 最大面积【mm²】   | 8268.75  |
| 最大压力【kg/f】  | 22092.97 |

内外翻

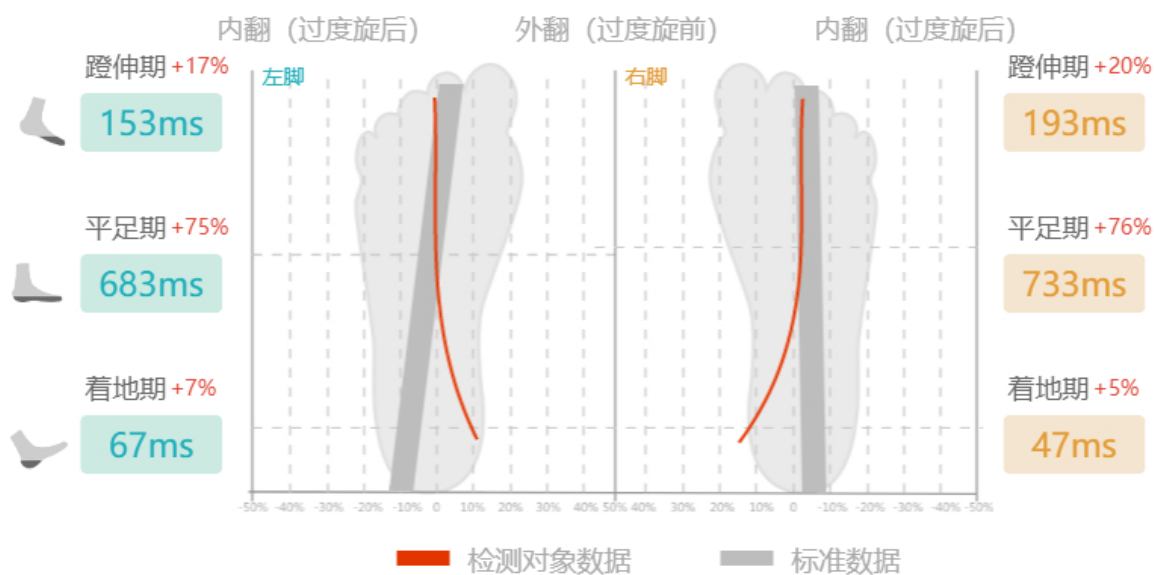

足弓类型

左脚

足弓指数 28.55%

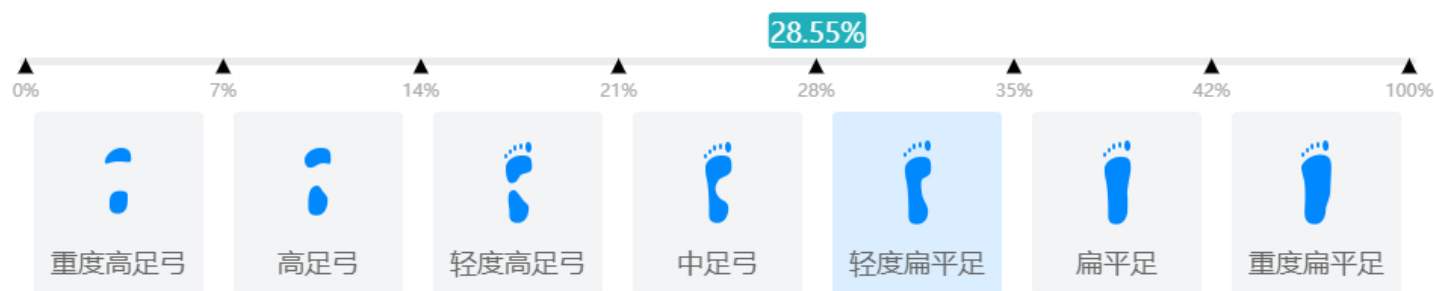

右脚

足弓指数 30.48%

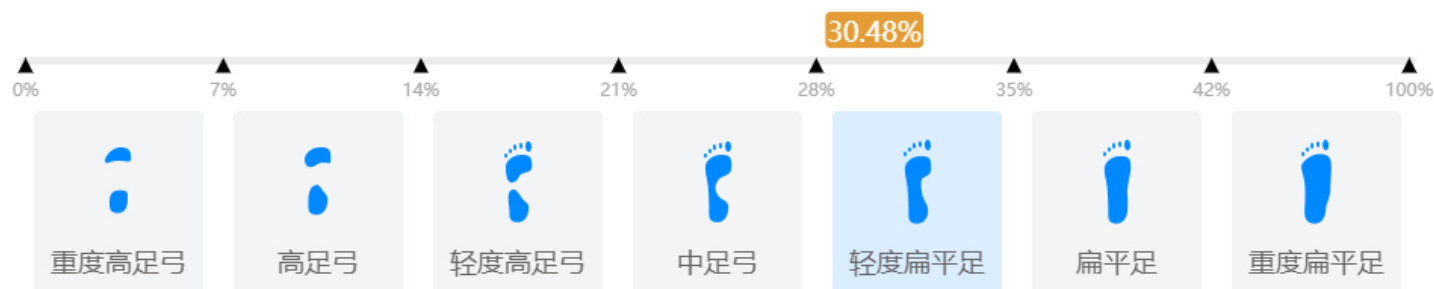

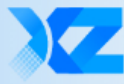

报告结论
