# Supplementary material for: Individualized Corrective Training Based on Precision Biomechanical Assessment for the Prevention of Sports Injuries in Adolescents
Source: Research Square preprint supplement (doi:10.21203/rs.3.rs-8426574/v1), 2026-02-02
Supplement: Supplementary file 141 [file 动态报告-王俊熙-20250226151344.pdf › Plantar pressure and gait analysis/soccer/动态报告-王俊熙-20250226151344.pdf]

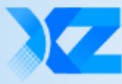

左右脚动态数据

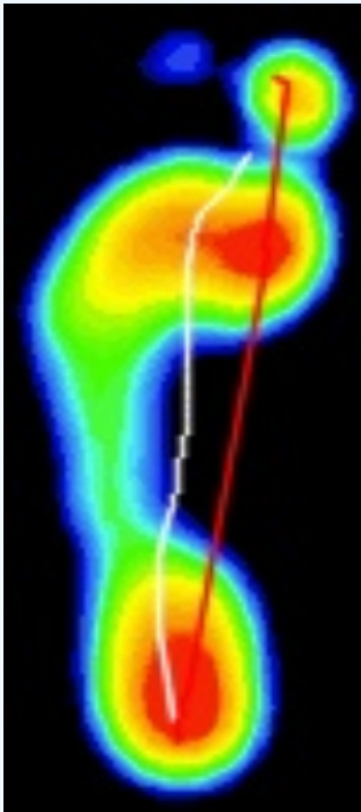

| 第2步      | Cop数据     | 第1步      |
|----------|-----------|----------|
| 201.06   | cop距离【mm】 | 181.68   |
| 7.25     | 步偏脚【°】    | -0.80    |
| 12690.88 | 面积【mm²】   | 13541.12 |
| 31459.49 | 压力【kgf】   | 33373.31 |
| 2.33     | 压强【gr/%】  | 2.38     |
| 43403.54 | 最大压力【kgf】 | 45199.52 |
| 0.19     | 速度【mm/ms】 | 0.23     |

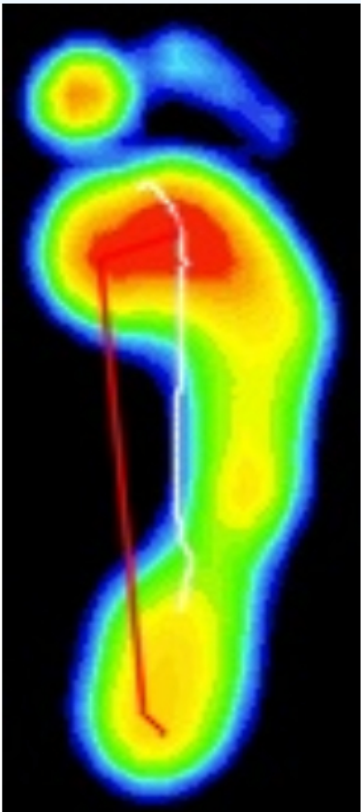

支撑相

左脚

|             |          |
|-------------|----------|
| ● 着地期 6%    |          |
| 时长【ms】      | 60.00    |
| 平均速度【mm/ms】 | 0.12     |
| 最大面积【mm²】   | 3783.15  |
| 最大压力【kgf】   | 7252.19  |
| ● 平足期 81%   |          |
| 时长【ms】      | 812.00   |
| 平均速度【mm/ms】 | 0.19     |
| 最大面积【mm²】   | 16994.70 |
| 最大压力【kgf】   | 45590.68 |
| ● 蹬伸期 13%   |          |
| 时长【ms】      | 132.00   |
| 平均速度【mm/ms】 | 0.17     |
| 最大面积【mm²】   | 8362.80  |
| 最大压力【kgf】   | 21601.20 |

右脚

|             |          |
|-------------|----------|
| ● 着地期 8%    |          |
| 时长【ms】      | 80.00    |
| 平均速度【mm/ms】 | 0.12     |
| 最大面积【mm²】   | 4077.38  |
| 最大压力【kgf】   | 8055.50  |
| ● 平足期 80%   |          |
| 时长【ms】      | 760.00   |
| 平均速度【mm/ms】 | 0.20     |
| 最大面积【mm²】   | 17818.88 |
| 最大压力【kgf】   | 46073.37 |
| ● 蹬伸期 12%   |          |
| 时长【ms】      | 110.00   |
| 平均速度【mm/ms】 | 0.25     |
| 最大面积【mm²】   | 8376.38  |
| 最大压力【kgf】   | 20705.20 |

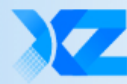

内外翻

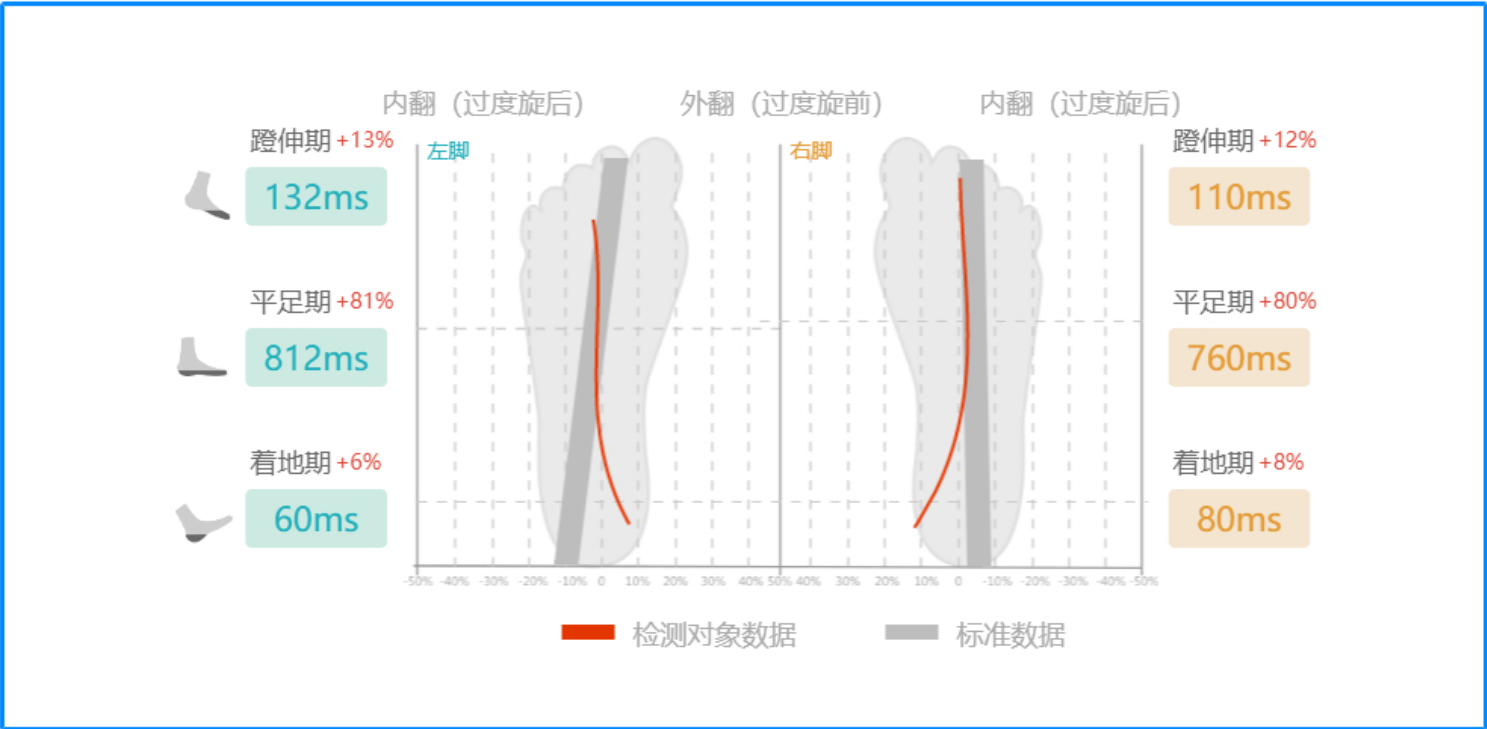

足弓类型

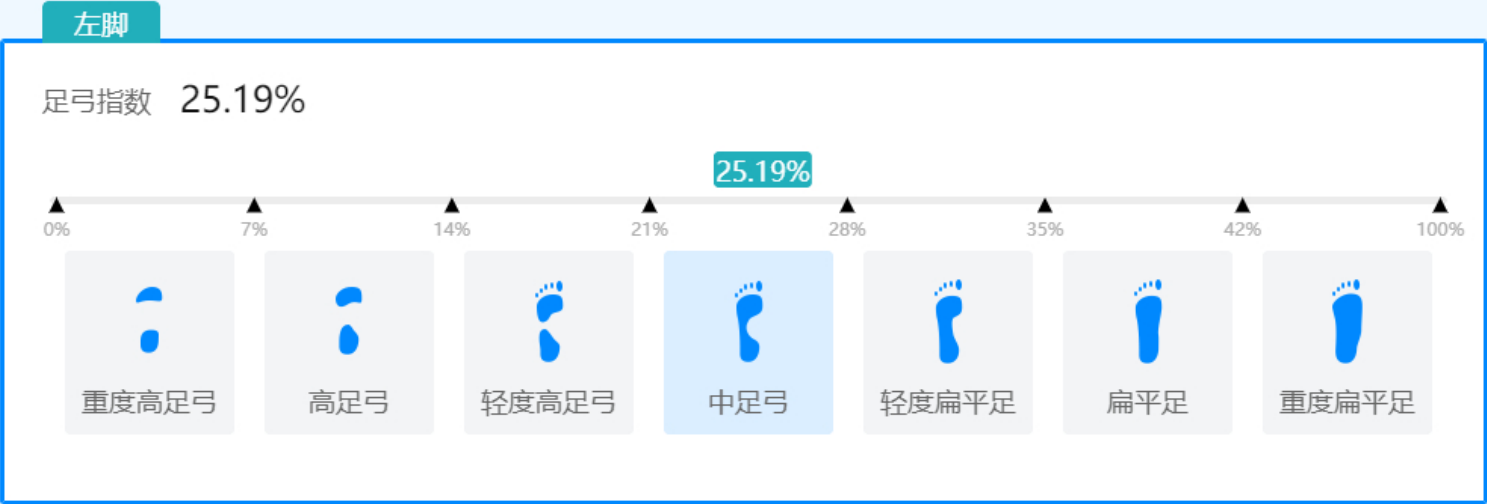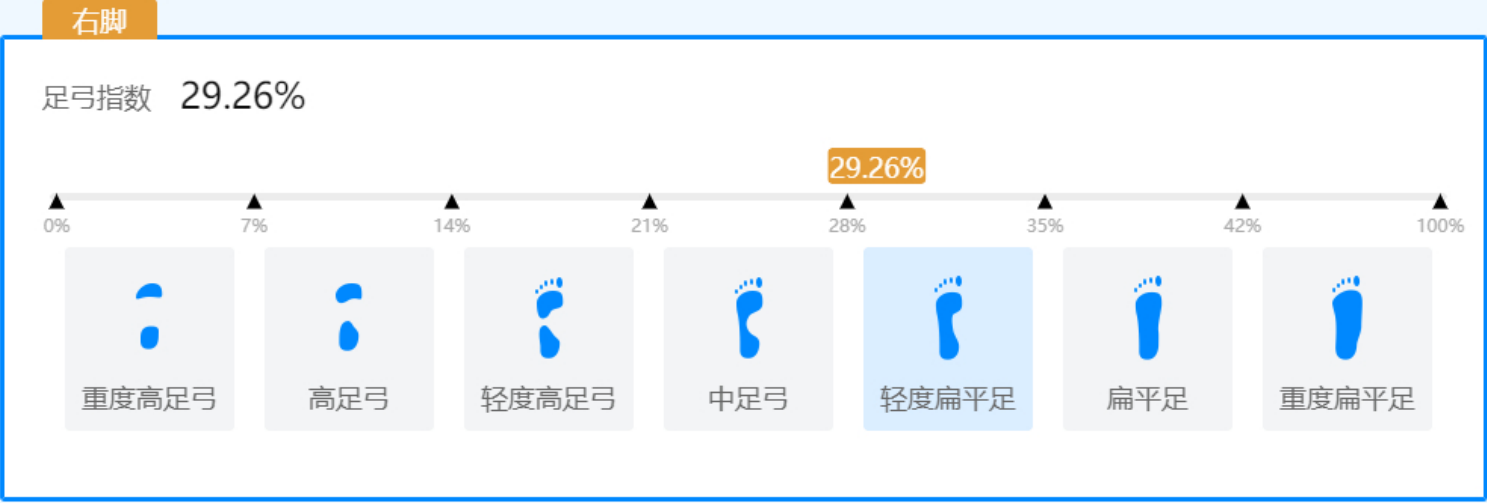

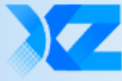

报告结论
