# Supplementary material for: Individualized Corrective Training Based on Precision Biomechanical Assessment for the Prevention of Sports Injuries in Adolescents
Source: Research Square preprint supplement (doi:10.21203/rs.3.rs-8426574/v1), 2026-02-02
Supplement: Supplementary file 142 [file 动态报告-王懿佳-20250226120125.pdf › Plantar pressure and gait analysis/soccer/动态报告-王懿佳-20250226120125.pdf]

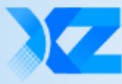

左右脚动态数据

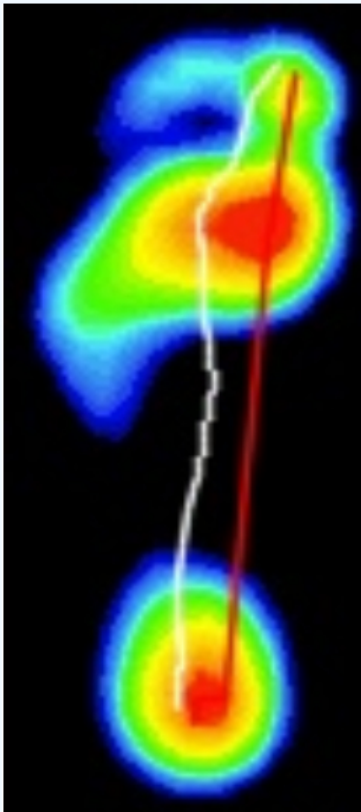

| 第1步      | Cop数据     | 第2步      |
|----------|-----------|----------|
| 201.96   | cop距离【mm】 | 218.00   |
| 8.75     | 步偏脚【°】    | 7.30     |
| 8612.70  | 面积【mm²】   | 8431.30  |
| 21239.89 | 压力【kgf】   | 21789.88 |
| 2.30     | 压强【gr/%】  | 2.36     |
| 30209.71 | 最大压力【kgf】 | 37615.26 |
| 0.22     | 速度【mm/ms】 | 0.22     |

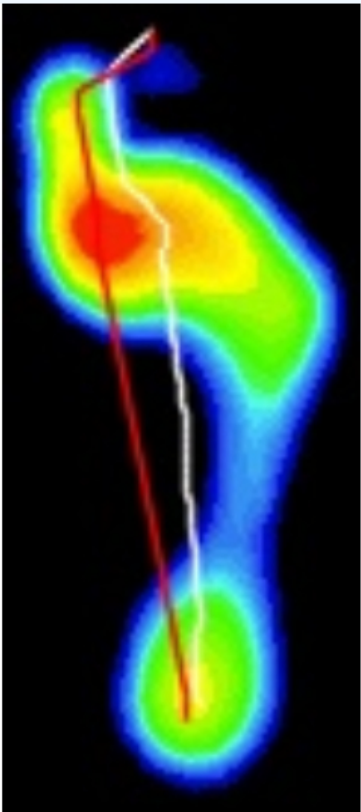

支撑相

左脚

|             |          |
|-------------|----------|
| ● 着地期 8%    |          |
| 时长【ms】      | 88.00    |
| 平均速度【mm/ms】 | 0.09     |
| 最大面积【mm²】   | 3245.85  |
| 最大压力【kgf】   | 6597.62  |
| ● 平足期 78%   |          |
| 时长【ms】      | 816.00   |
| 平均速度【mm/ms】 | 0.18     |
| 最大面积【mm²】   | 13607.10 |
| 最大压力【kgf】   | 36626.72 |
| ● 蹬伸期 14%   |          |
| 时长【ms】      | 148.00   |
| 平均速度【mm/ms】 | 0.33     |
| 最大面积【mm²】   | 7155.90  |
| 最大压力【kgf】   | 19105.65 |

右脚

|             |          |
|-------------|----------|
| ● 着地期 11%   |          |
| 时长【ms】      | 120.00   |
| 平均速度【mm/ms】 | 0.09     |
| 最大面积【mm²】   | 3352.50  |
| 最大压力【kgf】   | 7862.08  |
| ● 平足期 69%   |          |
| 时长【ms】      | 735.00   |
| 平均速度【mm/ms】 | 0.19     |
| 最大面积【mm²】   | 13362.75 |
| 最大压力【kgf】   | 39275.08 |
| ● 蹬伸期 19%   |          |
| 时长【ms】      | 205.00   |
| 平均速度【mm/ms】 | 0.26     |
| 最大面积【mm²】   | 7327.69  |
| 最大压力【kg/f】  | 22662.02 |

内外翻

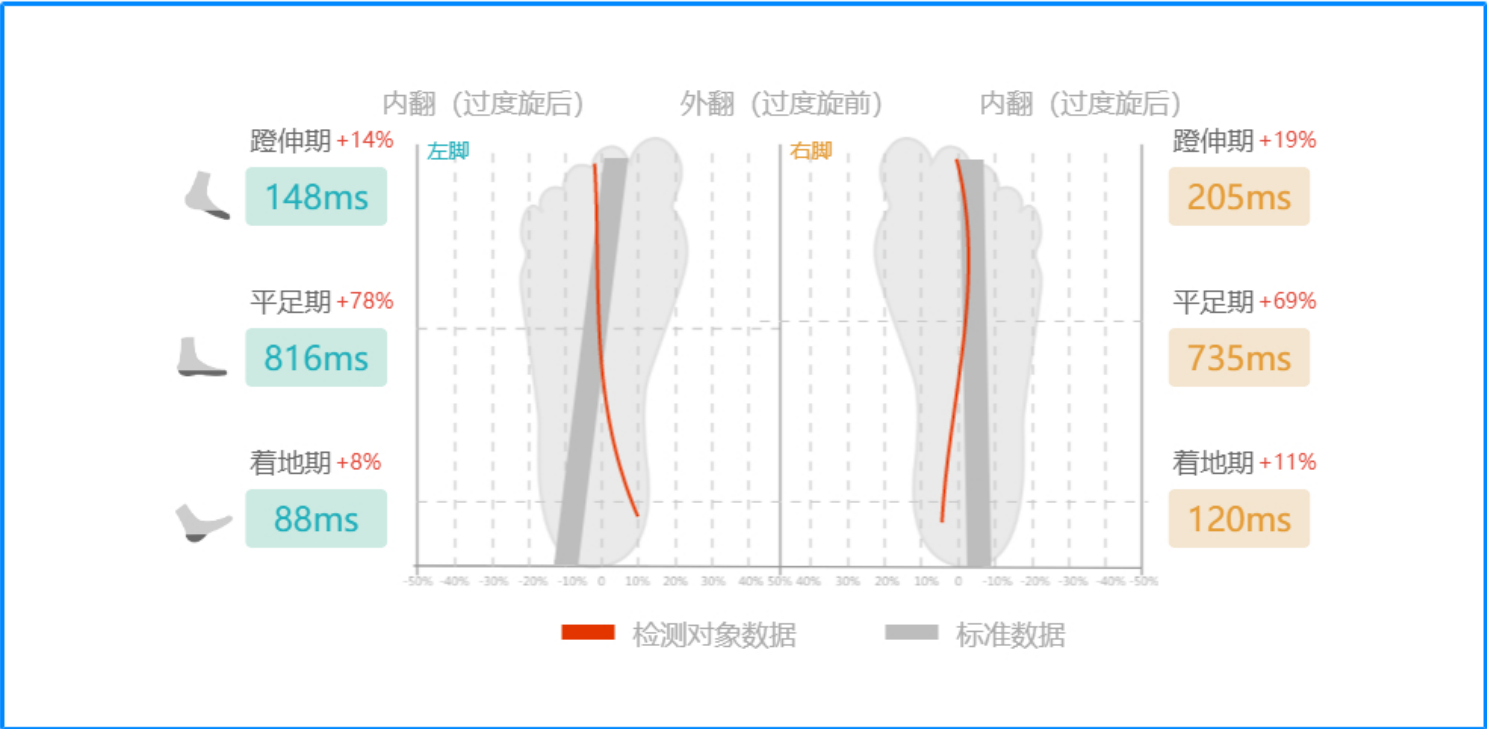

足弓类型

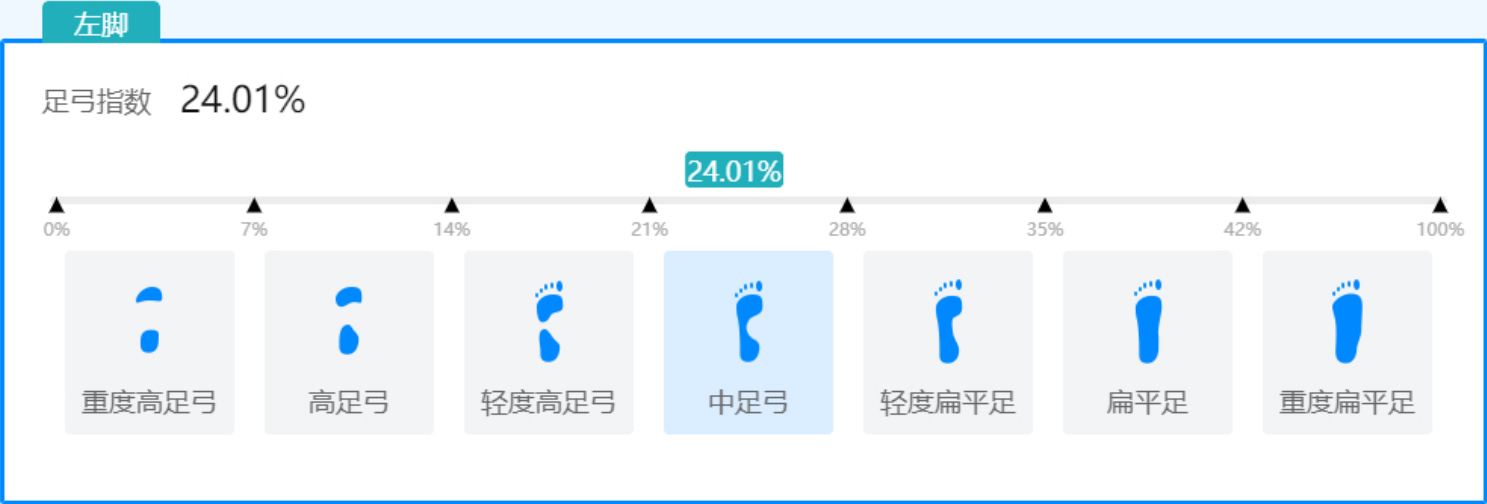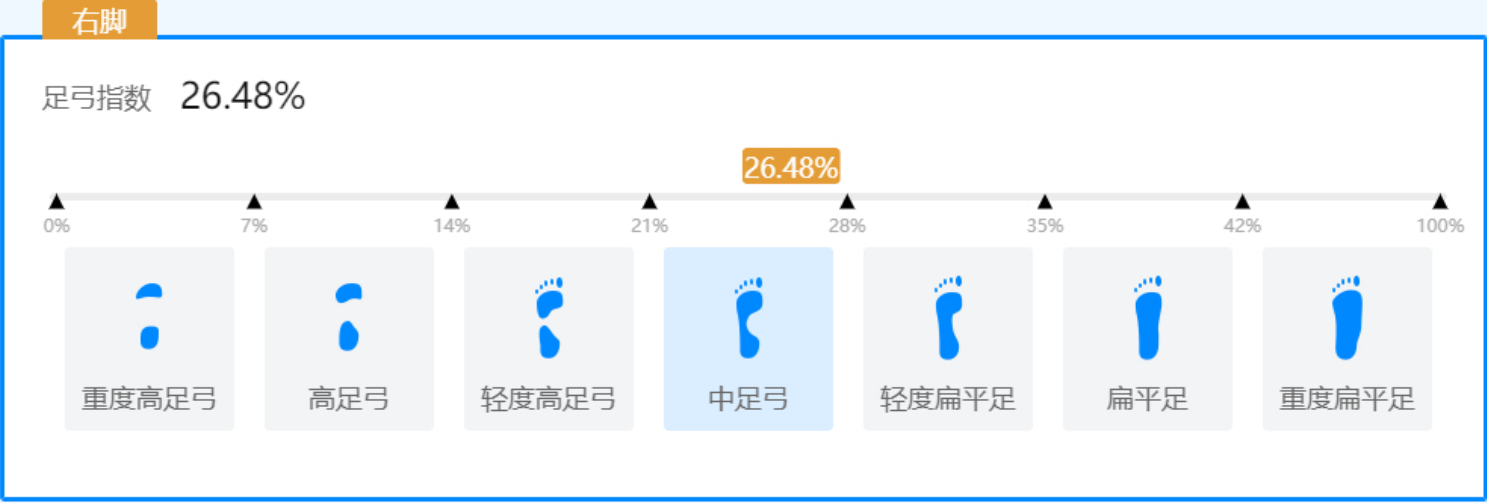

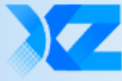

报告结论
