# Supplementary material for: Individualized Corrective Training Based on Precision Biomechanical Assessment for the Prevention of Sports Injuries in Adolescents
Source: Research Square preprint supplement (doi:10.21203/rs.3.rs-8426574/v1), 2026-02-02
Supplement: Supplementary file 143 [file 动态报告-王智丹-20250226133438.pdf › Plantar pressure and gait analysis/soccer/动态报告-王智丹-20250226133438.pdf]

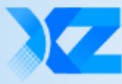

左右脚动态数据

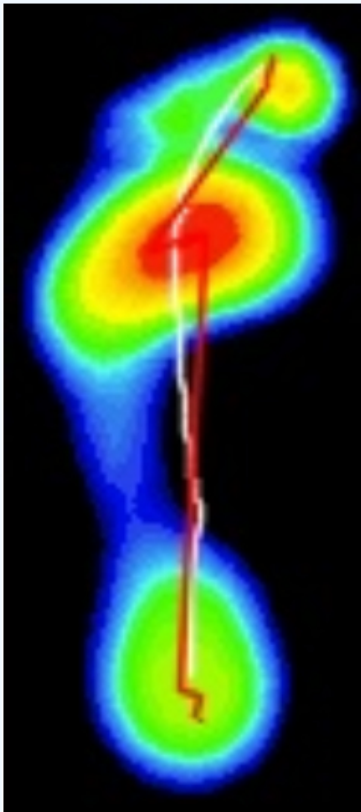

| 第2步      | Cop数据     | 第1步      |
|----------|-----------|----------|
| 201.45   | cop距离【mm】 | 169.20   |
| 10.72    | 步偏脚【°】    | 2.43     |
| 9691.95  | 面积【mm²】   | 11316.05 |
| 26986.46 | 压力【kgf】   | 30786.37 |
| 2.60     | 压强【gr/%】  | 2.58     |
| 41649.39 | 最大压力【kgf】 | 43830.30 |
| 0.23     | 速度【mm/ms】 | 0.19     |

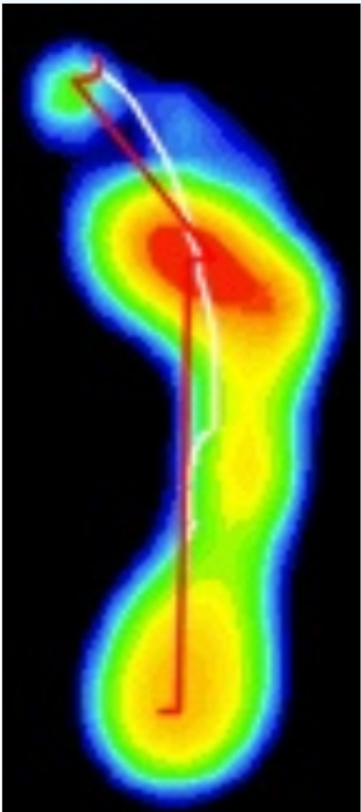

支撑相

左脚

|             |          |
|-------------|----------|
| ● 着地期 8%    |          |
| 时长【ms】      | 52.00    |
| 平均速度【mm/ms】 | 0.48     |
| 最大面积【mm²】   | 4248.90  |
| 最大压力【kgf】   | 6257.63  |
| ● 平足期 87%   |          |
| 时长【ms】      | 868.00   |
| 平均速度【mm/ms】 | 0.15     |
| 最大面积【mm²】   | 13433.40 |
| 最大压力【kgf】   | 40074.85 |
| ● 蹬伸期 6%    |          |
| 时长【ms】      | 70.00    |
| 平均速度【mm/ms】 | 0.39     |
| 最大面积【mm²】   | 4832.44  |
| 最大压力【kgf】   | 6984.40  |

右脚

|             |          |
|-------------|----------|
| ● 着地期 5%    |          |
| 时长【ms】      | 65.00    |
| 平均速度【mm/ms】 | 1.07     |
| 最大面积【mm²】   | 5405.06  |
| 最大压力【kgf】   | 7863.30  |
| ● 平足期 88%   |          |
| 时长【ms】      | 1096.00  |
| 平均速度【mm/ms】 | 0.11     |
| 最大面积【mm²】   | 15285.15 |
| 最大压力【kgf】   | 47862.64 |
| ● 蹬伸期 8%    |          |
| 时长【ms】      | 96.00    |
| 平均速度【mm/ms】 | 0.43     |
| 最大面积【mm²】   | 5345.55  |
| 最大压力【kgf】   | 8749.32  |

内外翻

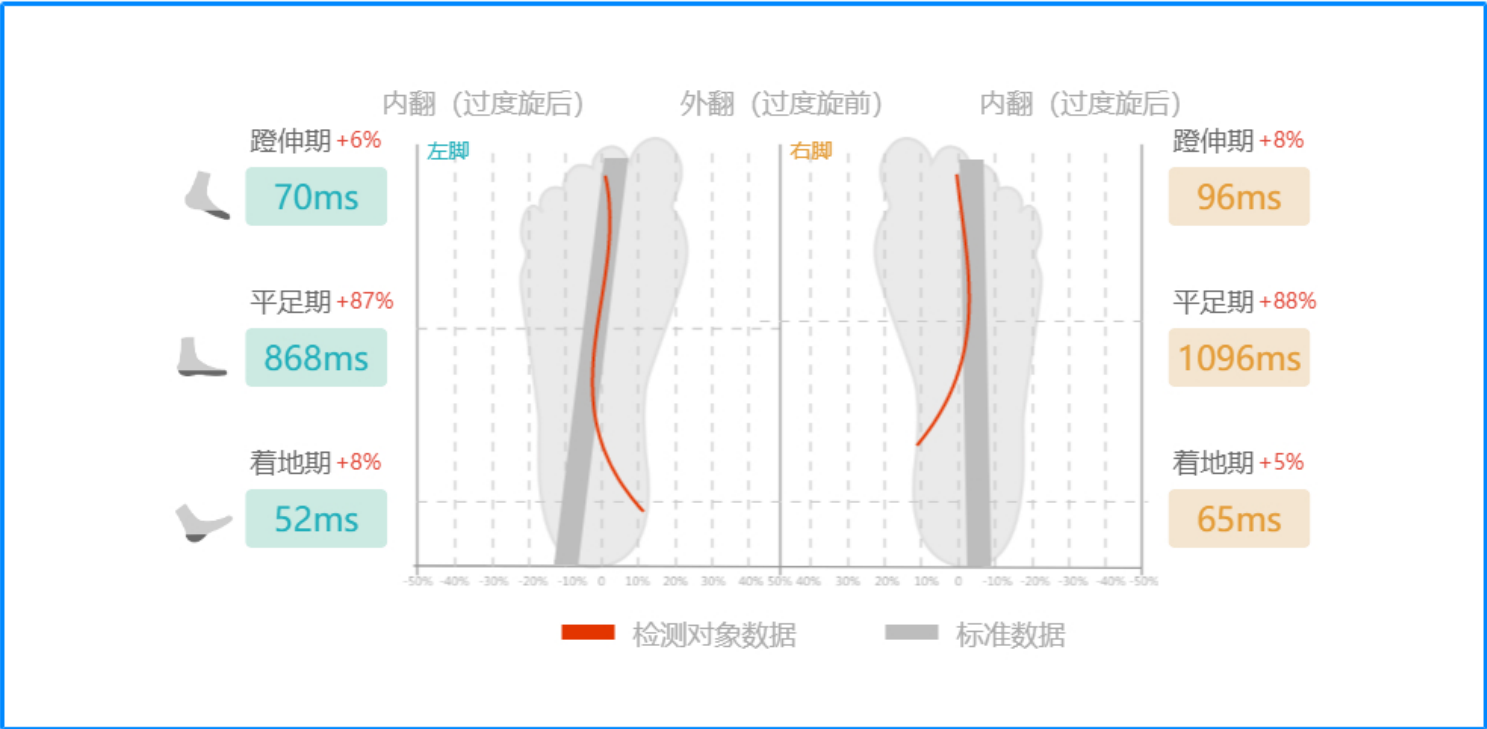

足弓类型

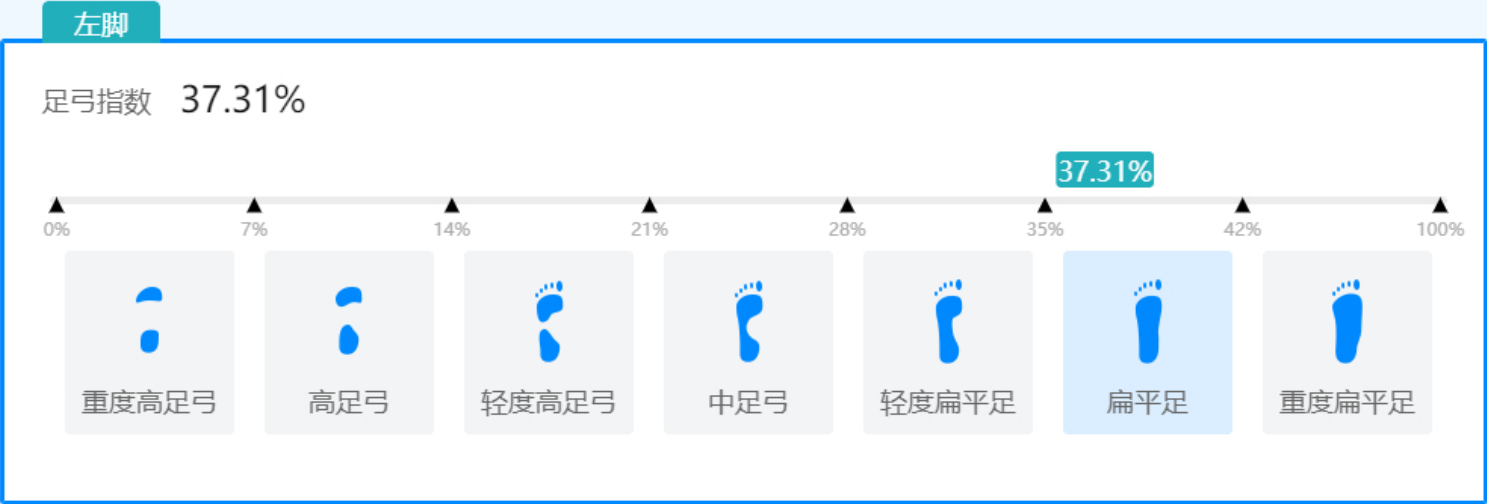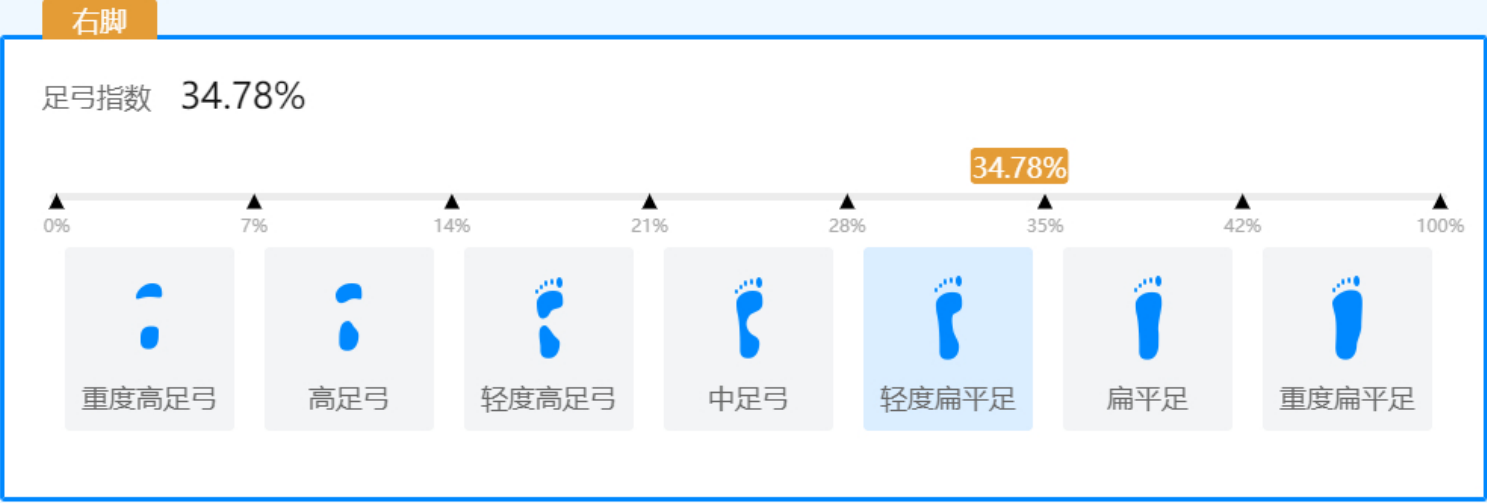

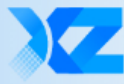

报告结论
