# Supplementary material for: Individualized Corrective Training Based on Precision Biomechanical Assessment for the Prevention of Sports Injuries in Adolescents
Source: Research Square preprint supplement (doi:10.21203/rs.3.rs-8426574/v1), 2026-02-02
Supplement: Supplementary file 144 [file 动态报告-王欣鑫-20250226133940.pdf › Plantar pressure and gait analysis/soccer/动态报告-王欣鑫-20250226133940.pdf]

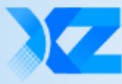

左右脚动态数据

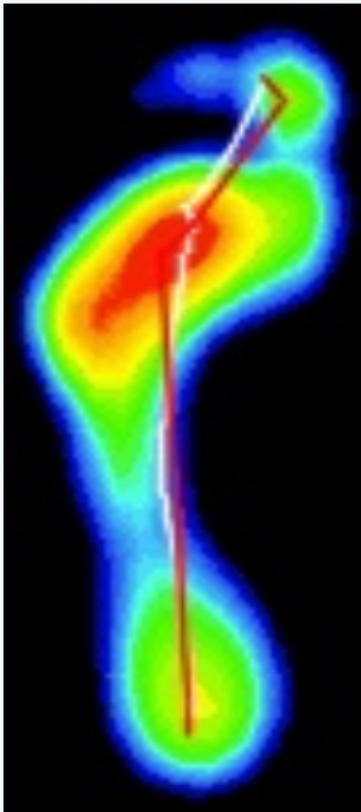

| 第2步      | Cop数据     | 第1步      |
|----------|-----------|----------|
| 199.64   | cop距离【mm】 | 207.11   |
| 3.80     | 步偏脚【°】    | 7.06     |
| 8686.36  | 面积【mm²】   | 9327.48  |
| 23253.53 | 压力【kgf】   | 25383.63 |
| 2.46     | 压强【gr/%】  | 2.53     |
| 36381.82 | 最大压力【kgf】 | 40967.00 |
| 0.21     | 速度【mm/ms】 | 0.20     |

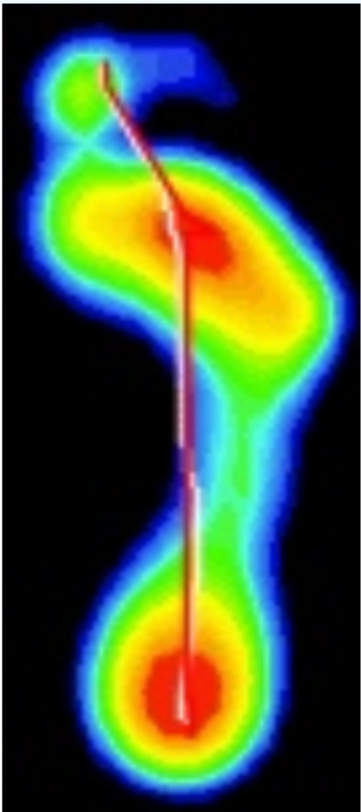

支撑相

左脚

|             |          |
|-------------|----------|
| ● 着地期 12%   |          |
| 时长【ms】      | 116.00   |
| 平均速度【mm/ms】 | 0.11     |
| 最大面积【mm²】   | 3547.35  |
| 最大压力【kgf】   | 7974.09  |
| ● 平足期 72%   |          |
| 时长【ms】      | 720.00   |
| 平均速度【mm/ms】 | 0.20     |
| 最大面积【mm²】   | 13630.50 |
| 最大压力【kgf】   | 38700.07 |
| ● 蹬伸期 16%   |          |
| 时长【ms】      | 160.00   |
| 平均速度【mm/ms】 | 0.27     |
| 最大面积【mm²】   | 7062.75  |
| 最大压力【kgf】   | 20360.28 |

右脚

|             |          |
|-------------|----------|
| ● 着地期 15%   |          |
| 时长【ms】      | 144.00   |
| 平均速度【mm/ms】 | 0.08     |
| 最大面积【mm²】   | 3567.60  |
| 最大压力【kgf】   | 10660.33 |
| ● 平足期 72%   |          |
| 时长【ms】      | 708.00   |
| 平均速度【mm/ms】 | 0.21     |
| 最大面积【mm²】   | 14037.30 |
| 最大压力【kgf】   | 39417.76 |
| ● 蹬伸期 13%   |          |
| 时长【ms】      | 128.00   |
| 平均速度【mm/ms】 | 0.27     |
| 最大面积【mm²】   | 7105.05  |
| 最大压力【kg/f】  | 19147.84 |

内外翻

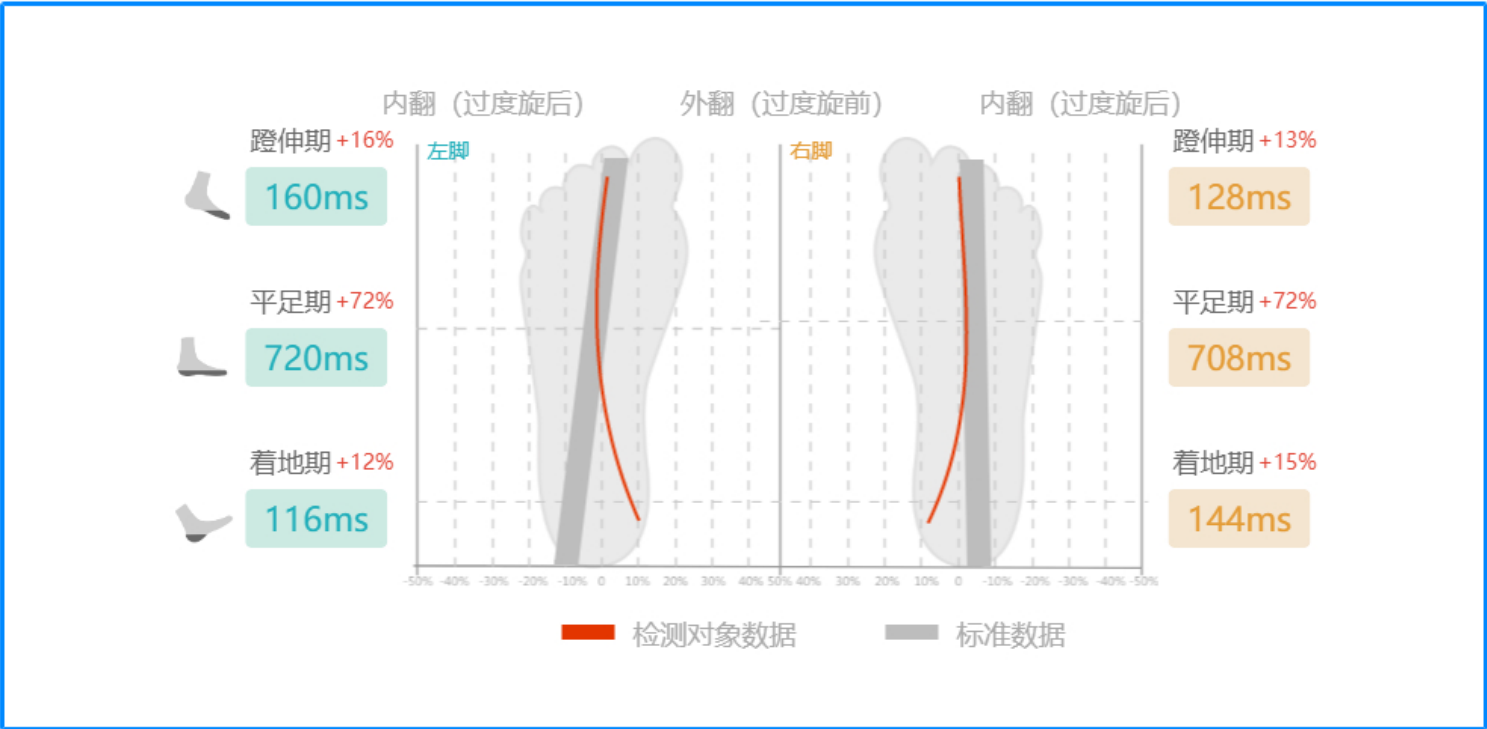

足弓类型

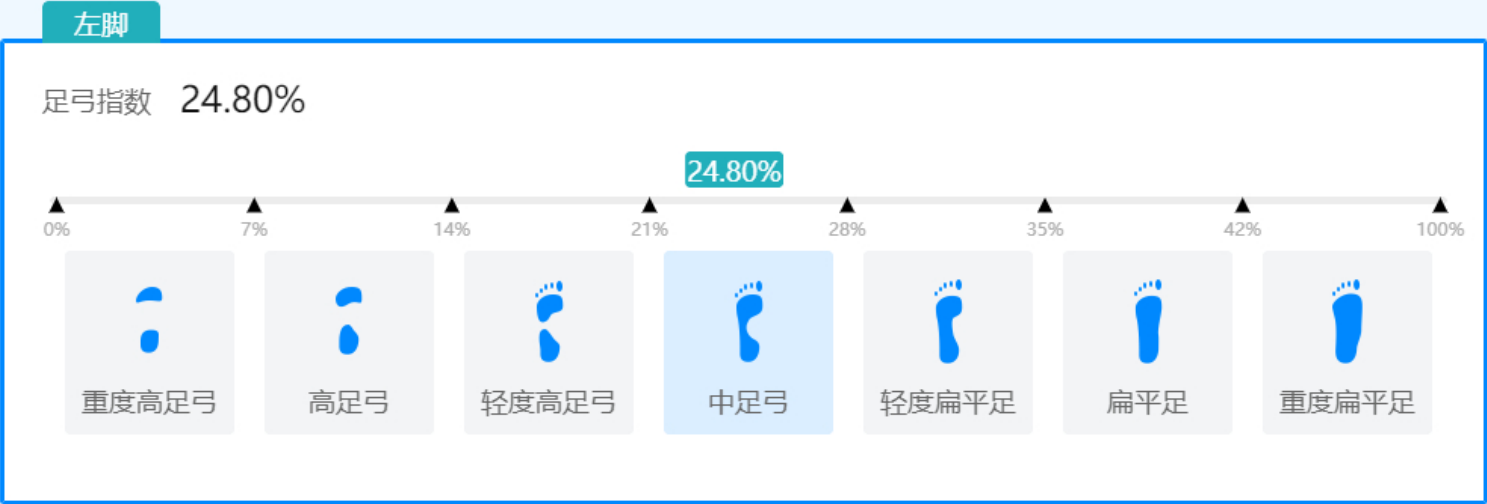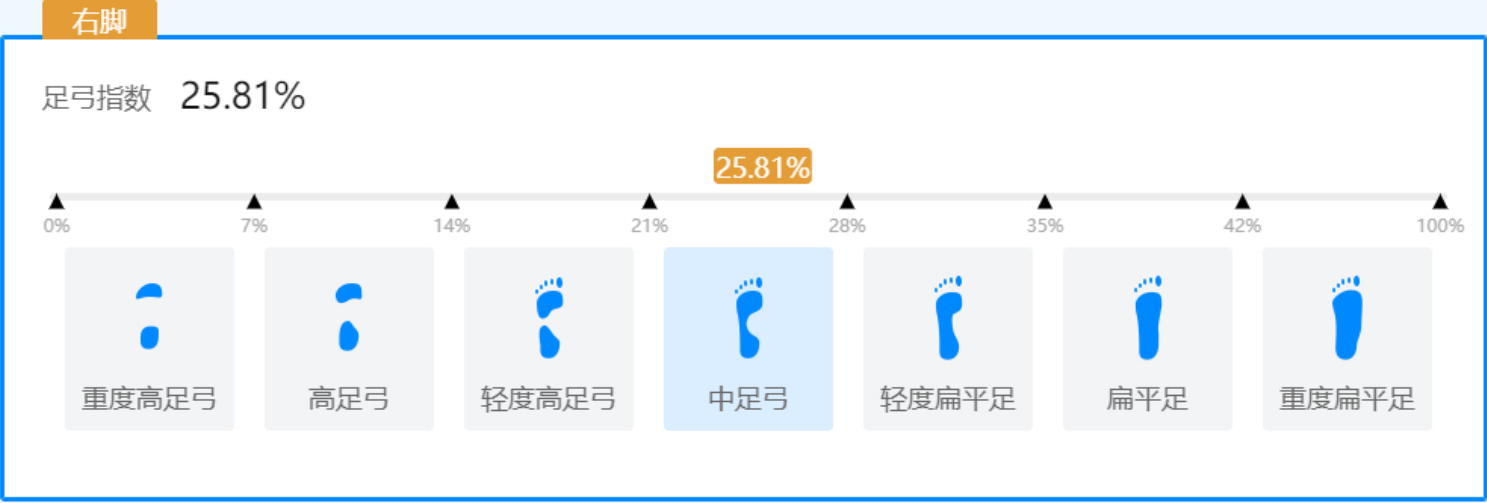

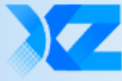

报告结论
