# Supplementary material for: Individualized Corrective Training Based on Precision Biomechanical Assessment for the Prevention of Sports Injuries in Adolescents
Source: Research Square preprint supplement (doi:10.21203/rs.3.rs-8426574/v1), 2026-02-02
Supplement: Supplementary file 145 [file 动态报告-王珊珊-20250226123742.pdf › Plantar pressure and gait analysis/soccer/动态报告-王珊珊-20250226123742.pdf]

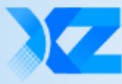

左右脚动态数据

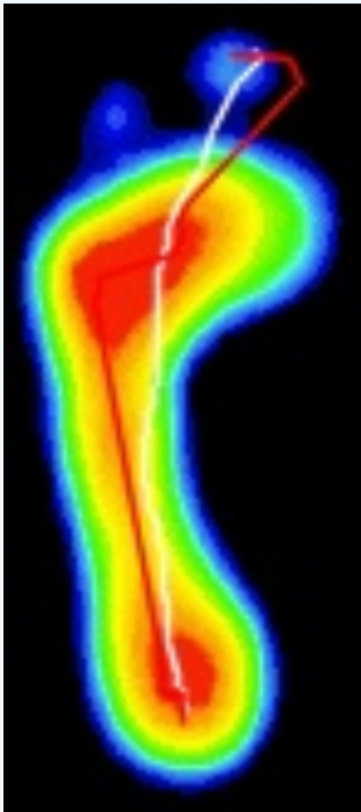

| 第1步      | Cop数据     | 第2步      |
|----------|-----------|----------|
| 216.66   | cop距离【mm】 | 228.35   |
| 6.14     | 步偏脚【°】    | 0.77     |
| 10042.64 | 面积【mm²】   | 9437.49  |
| 26940.11 | 压力【kgf】   | 25279.75 |
| 2.48     | 压强【gr/%】  | 2.48     |
| 38170.99 | 最大压力【kgf】 | 39028.83 |
| 0.19     | 速度【mm/ms】 | 0.20     |

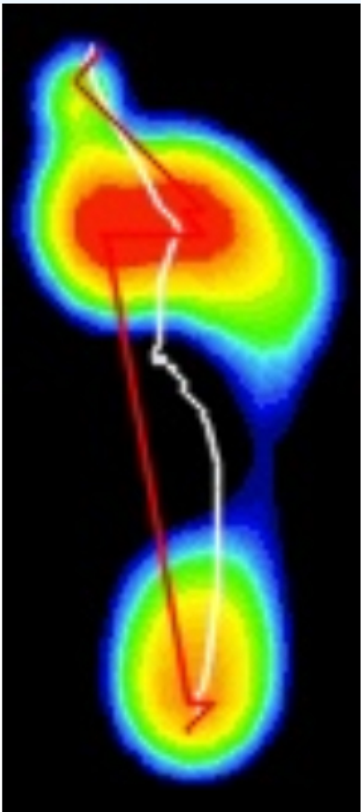

支撑相

左脚

|             |          |
|-------------|----------|
| ● 着地期 7%    |          |
| 时长【ms】      | 80.00    |
| 平均速度【mm/ms】 | 0.08     |
| 最大面积【mm²】   | 3937.05  |
| 最大压力【kgf】   | 8834.28  |
| ● 平足期 83%   |          |
| 时长【ms】      | 920.00   |
| 平均速度【mm/ms】 | 0.17     |
| 最大面积【mm²】   | 15019.65 |
| 最大压力【kgf】   | 42536.31 |
| ● 蹬伸期 10%   |          |
| 时长【ms】      | 116.00   |
| 平均速度【mm/ms】 | 0.40     |
| 最大面积【mm²】   | 6410.70  |
| 最大压力【kgf】   | 11556.88 |

右脚

|             |          |
|-------------|----------|
| ● 着地期 7%    |          |
| 时长【ms】      | 80.00    |
| 平均速度【mm/ms】 | 0.10     |
| 最大面积【mm²】   | 3518.55  |
| 最大压力【kgf】   | 7317.79  |
| ● 平足期 77%   |          |
| 时长【ms】      | 848.00   |
| 平均速度【mm/ms】 | 0.17     |
| 最大面积【mm²】   | 14600.70 |
| 最大压力【kgf】   | 40585.21 |
| ● 蹬伸期 16%   |          |
| 时长【ms】      | 176.00   |
| 平均速度【mm/ms】 | 0.33     |
| 最大面积【mm²】   | 6733.35  |
| 最大压力【kgf】   | 19856.17 |

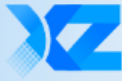

内外翻

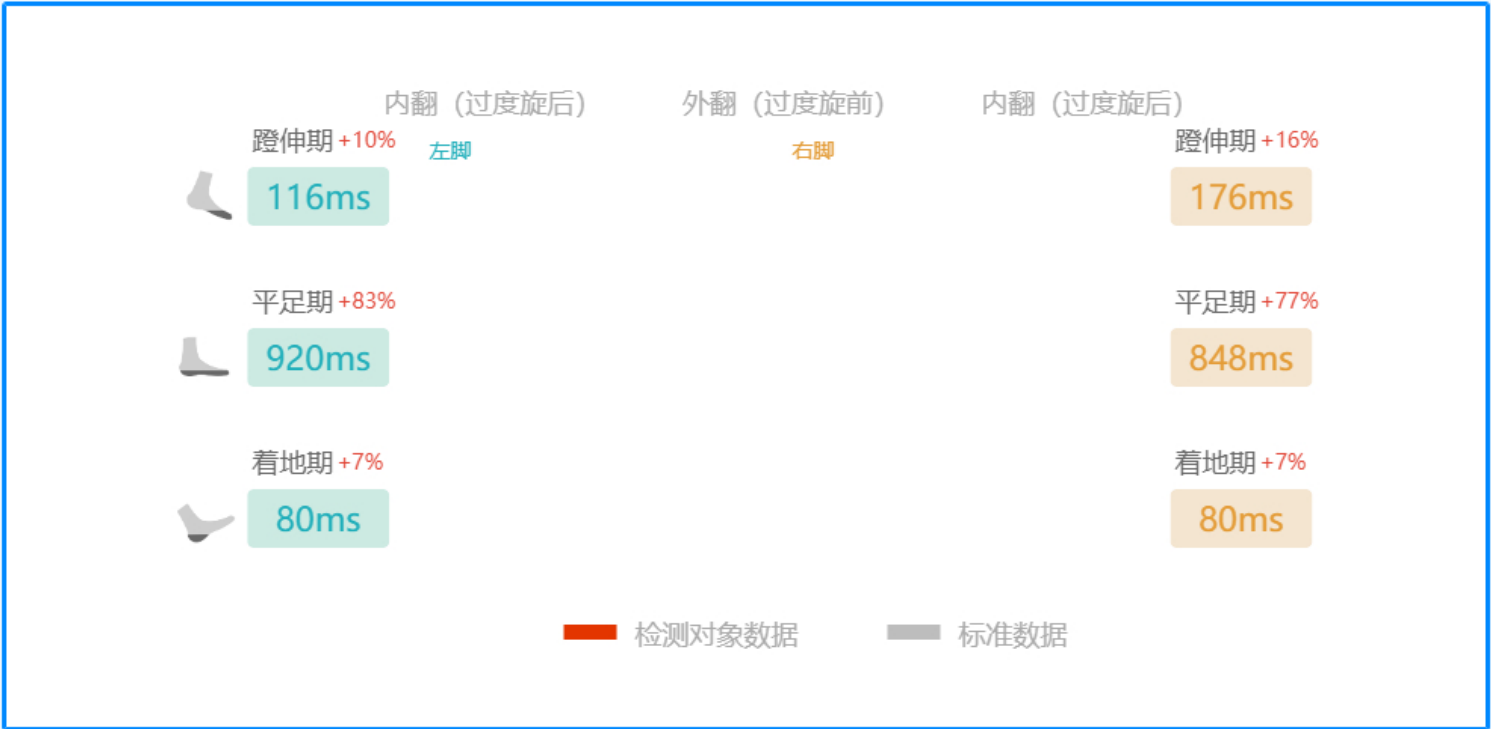

足弓类型

左脚

足弓指数 37.96%

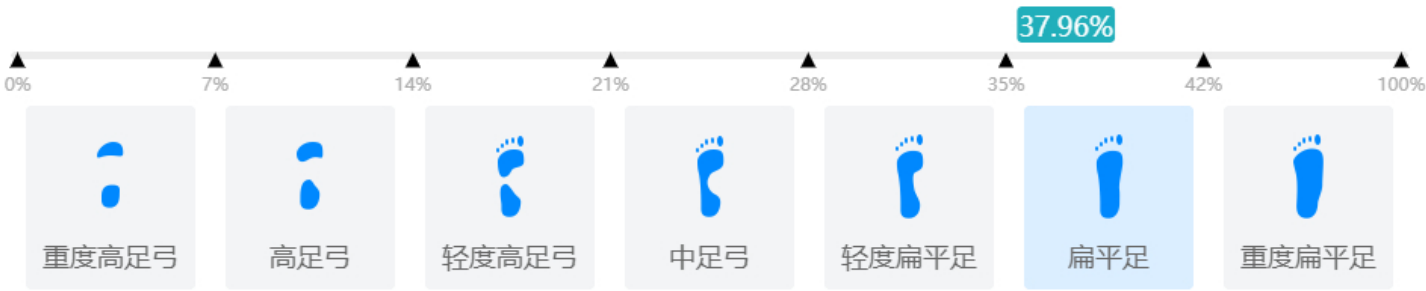

右脚

足弓指数 34.73%

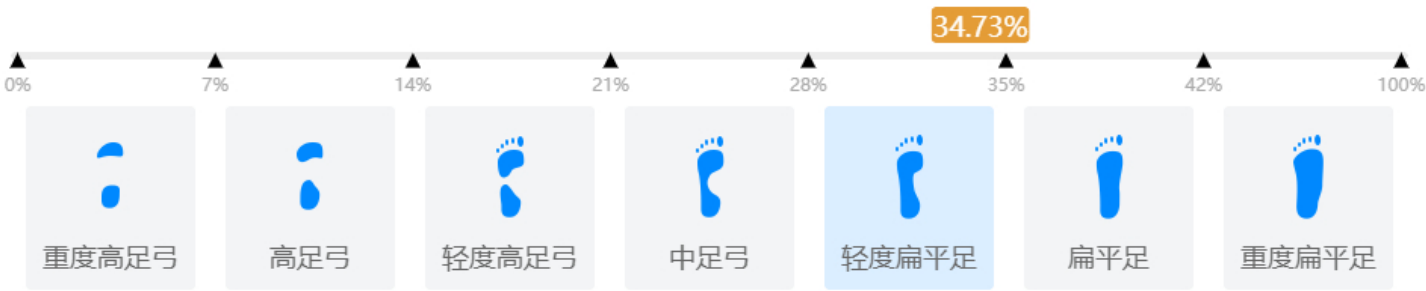

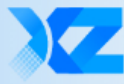

报告结论
