# Supplementary material for: Individualized Corrective Training Based on Precision Biomechanical Assessment for the Prevention of Sports Injuries in Adolescents
Source: Research Square preprint supplement (doi:10.21203/rs.3.rs-8426574/v1), 2026-02-02
Supplement: Supplementary file 146 [file 动态报告-王硕-20250226150805.pdf › Plantar pressure and gait analysis/soccer/动态报告-王硕-20250226150805.pdf]

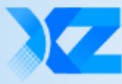

左右脚动态数据

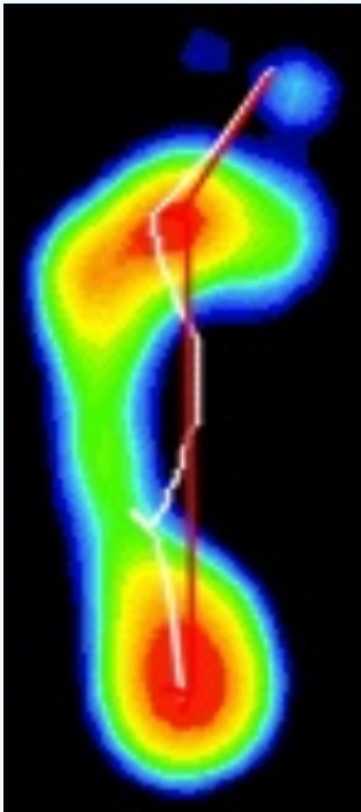

| 第2步      | Cop数据     | 第1步      |
|----------|-----------|----------|
| 233.68   | cop距离【mm】 | 239.21   |
| 12.30    | 步偏脚【°】    | 2.84     |
| 10326.34 | 面积【mm²】   | 10032.29 |
| 27866.18 | 压力【kgf】   | 26141.21 |
| 2.55     | 压强【gr/%】  | 2.42     |
| 37247.26 | 最大压力【kgf】 | 37722.09 |
| 0.16     | 速度【mm/ms】 | 0.16     |

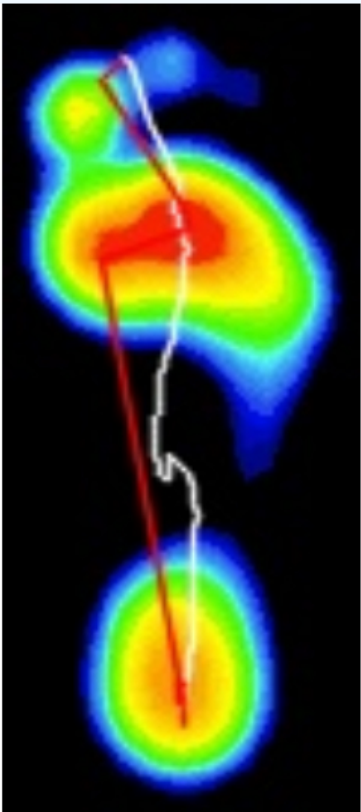

支撑相

左脚

|             |          |
|-------------|----------|
| ● 着地期 5%    |          |
| 时长【ms】      | 60.00    |
| 平均速度【mm/ms】 | 0.14     |
| 最大面积【mm²】   | 2975.06  |
| 最大压力【kgf】   | 5354.89  |
| ● 平足期 81%   |          |
| 时长【ms】      | 995.00   |
| 平均速度【mm/ms】 | 0.13     |
| 最大面积【mm²】   | 13510.13 |
| 最大压力【kgf】   | 35812.66 |
| ● 蹬伸期 19%   |          |
| 时长【ms】      | 266.67   |
| 平均速度【mm/ms】 | 0.24     |
| 最大面积【mm²】   | 6984.75  |
| 最大压力【kgf】   | 18694.97 |

右脚

|             |          |
|-------------|----------|
| ● 着地期 9%    |          |
| 时长【ms】      | 125.00   |
| 平均速度【mm/ms】 | 0.13     |
| 最大面积【mm²】   | 4172.63  |
| 最大压力【kgf】   | 9643.38  |
| ● 平足期 71%   |          |
| 时长【ms】      | 1015.00  |
| 平均速度【mm/ms】 | 0.15     |
| 最大面积【mm²】   | 14738.06 |
| 最大压力【kgf】   | 40166.89 |
| ● 蹬伸期 20%   |          |
| 时长【ms】      | 290.00   |
| 平均速度【mm/ms】 | 0.15     |
| 最大面积【mm²】   | 8645.06  |
| 最大压力【kg/f】  | 25641.47 |

内外翻

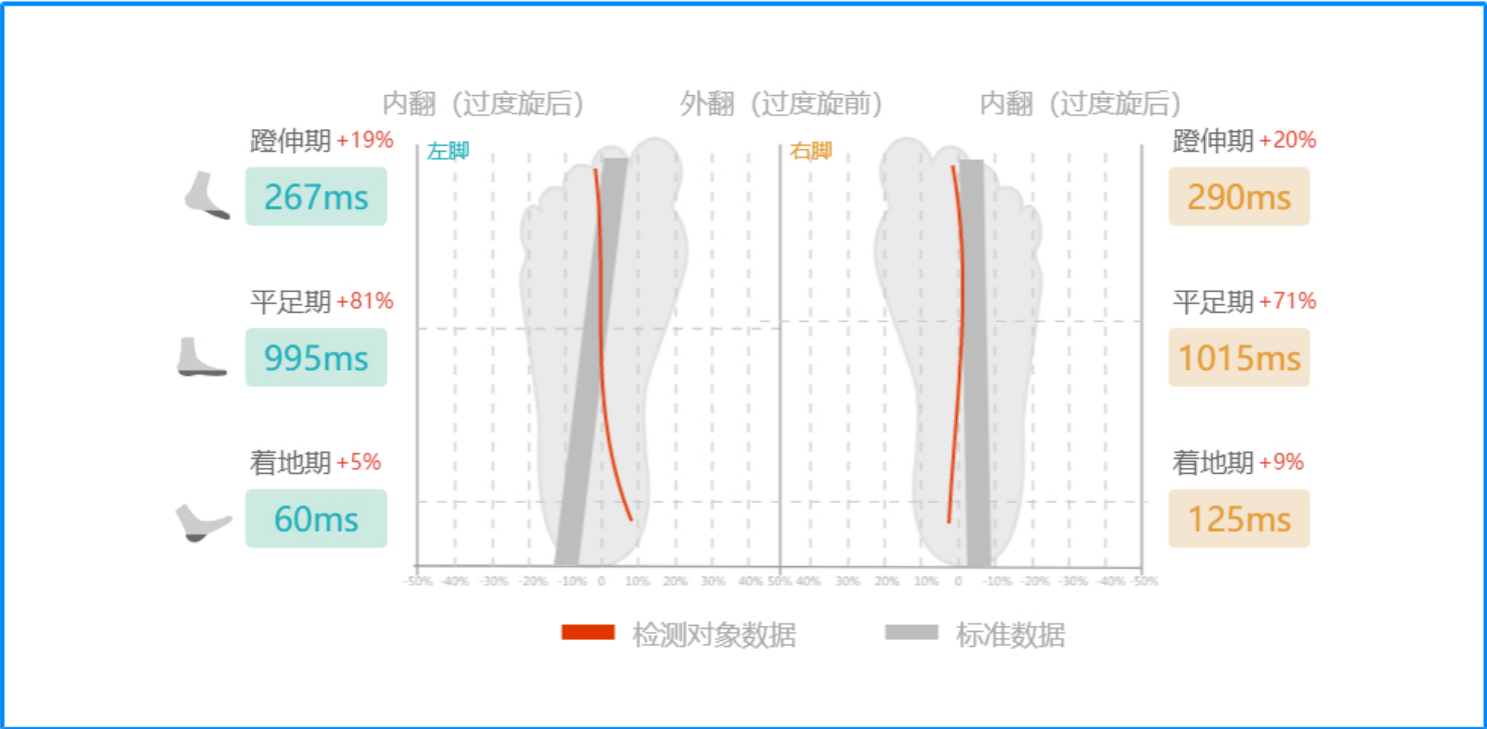

足弓类型

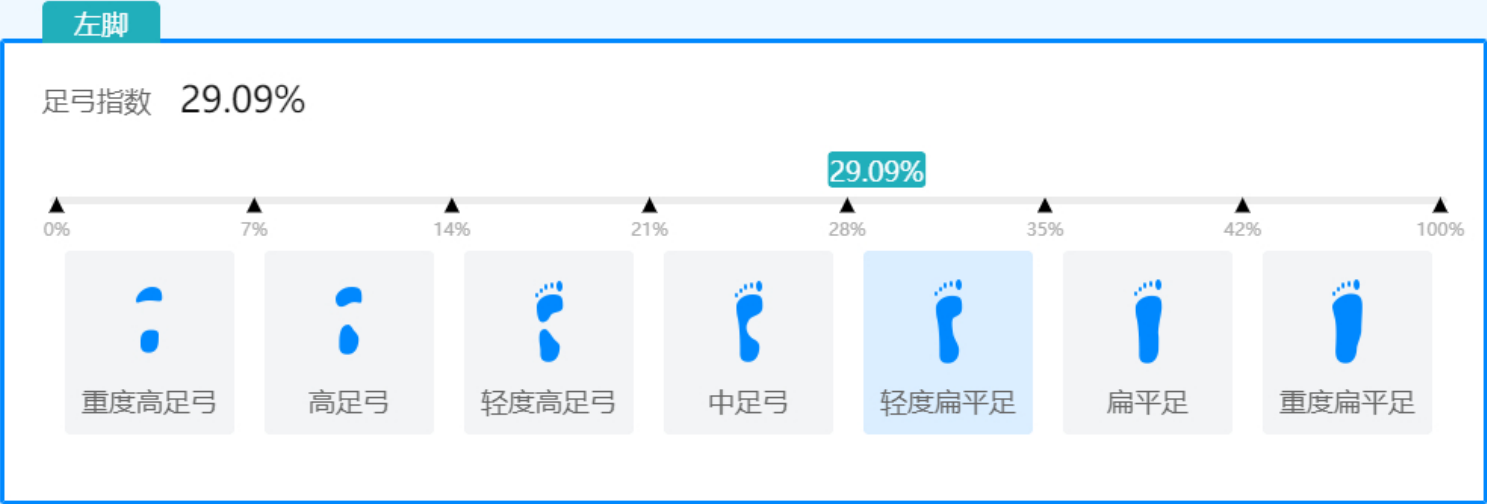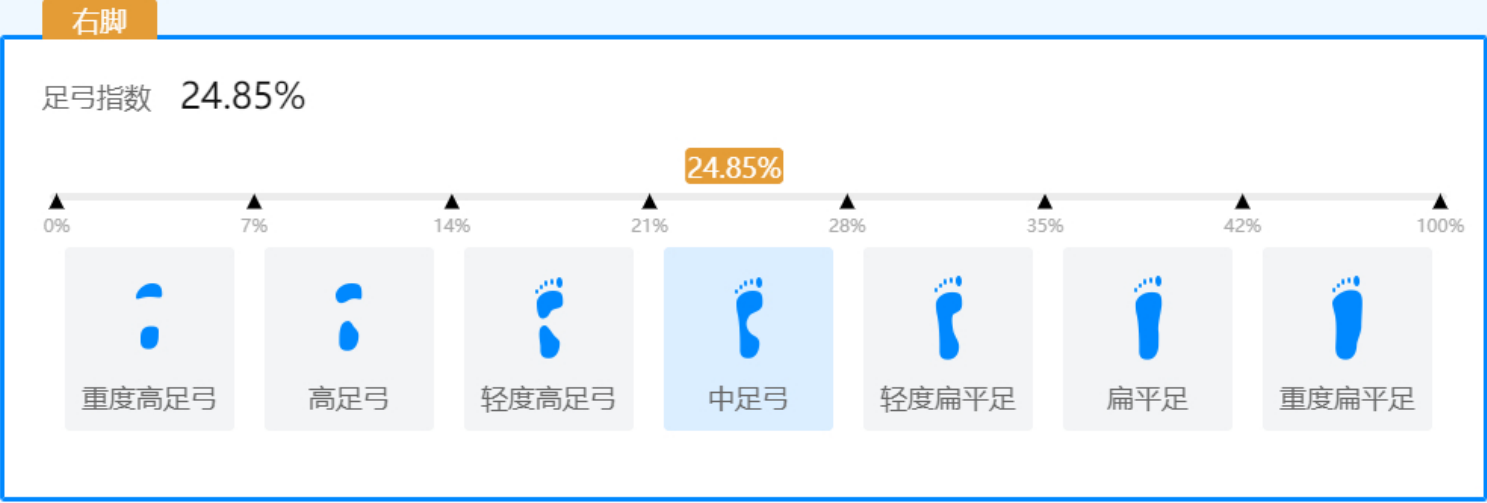

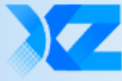

报告结论
