# Supplementary material for: Individualized Corrective Training Based on Precision Biomechanical Assessment for the Prevention of Sports Injuries in Adolescents
Source: Research Square preprint supplement (doi:10.21203/rs.3.rs-8426574/v1), 2026-02-02
Supplement: Supplementary file 147 [file 动态报告-王舒畅-20250226105055.pdf › Plantar pressure and gait analysis/soccer/动态报告-王舒畅-20250226105055.pdf]

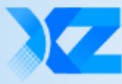

左右脚动态数据

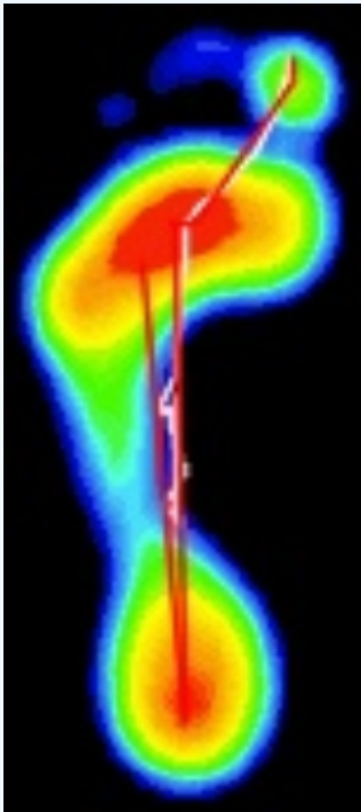

| 第2步      | Cop数据     | 第1步      |
|----------|-----------|----------|
| 260.30   | cop距离【mm】 | 194.15   |
| 7.53     | 步偏脚【°】    | 9.38     |
| 11834.26 | 面积【mm²】   | 11234.82 |
| 30498.87 | 压力【kgf】   | 28359.46 |
| 2.37     | 压强【gr/%】  | 2.29     |
| 44670.15 | 最大压力【kgf】 | 44480.71 |
| 0.22     | 速度【mm/ms】 | 0.19     |

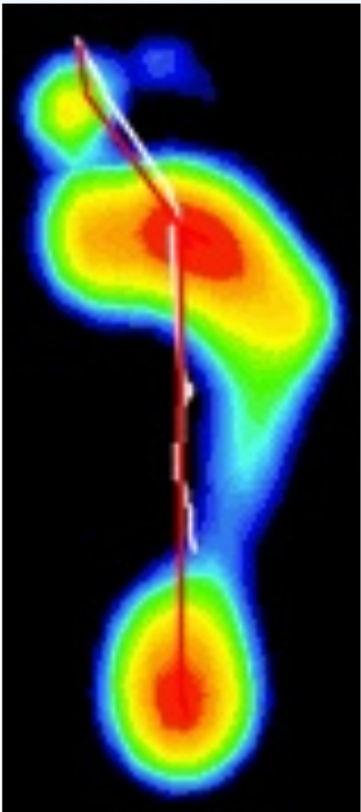

支撑相

左脚

|             |          |
|-------------|----------|
| ● 着地期 6%    |          |
| 时长【ms】      | 65.00    |
| 平均速度【mm/ms】 | 1.05     |
| 最大面积【mm²】   | 6411.38  |
| 最大压力【kgf】   | 8438.88  |
| ● 平足期 76%   |          |
| 时长【ms】      | 840.00   |
| 平均速度【mm/ms】 | 0.13     |
| 最大面积【mm²】   | 15166.69 |
| 最大压力【kgf】   | 42294.57 |
| ● 蹬伸期 18%   |          |
| 时长【ms】      | 200.00   |
| 平均速度【mm/ms】 | 0.28     |
| 最大面积【mm²】   | 8303.63  |
| 最大压力【kgf】   | 22283.30 |

右脚

|             |          |
|-------------|----------|
| ● 着地期 4%    |          |
| 时长【ms】      | 44.00    |
| 平均速度【mm/ms】 | 0.71     |
| 最大面积【mm²】   | 4368.15  |
| 最大压力【kgf】   | 5751.45  |
| ● 平足期 81%   |          |
| 时长【ms】      | 884.00   |
| 平均速度【mm/ms】 | 0.15     |
| 最大面积【mm²】   | 14607.45 |
| 最大压力【kgf】   | 42419.94 |
| ● 蹬伸期 15%   |          |
| 时长【ms】      | 160.00   |
| 平均速度【mm/ms】 | 0.38     |
| 最大面积【mm²】   | 7734.15  |
| 最大压力【kgf】   | 20033.00 |

内外翻

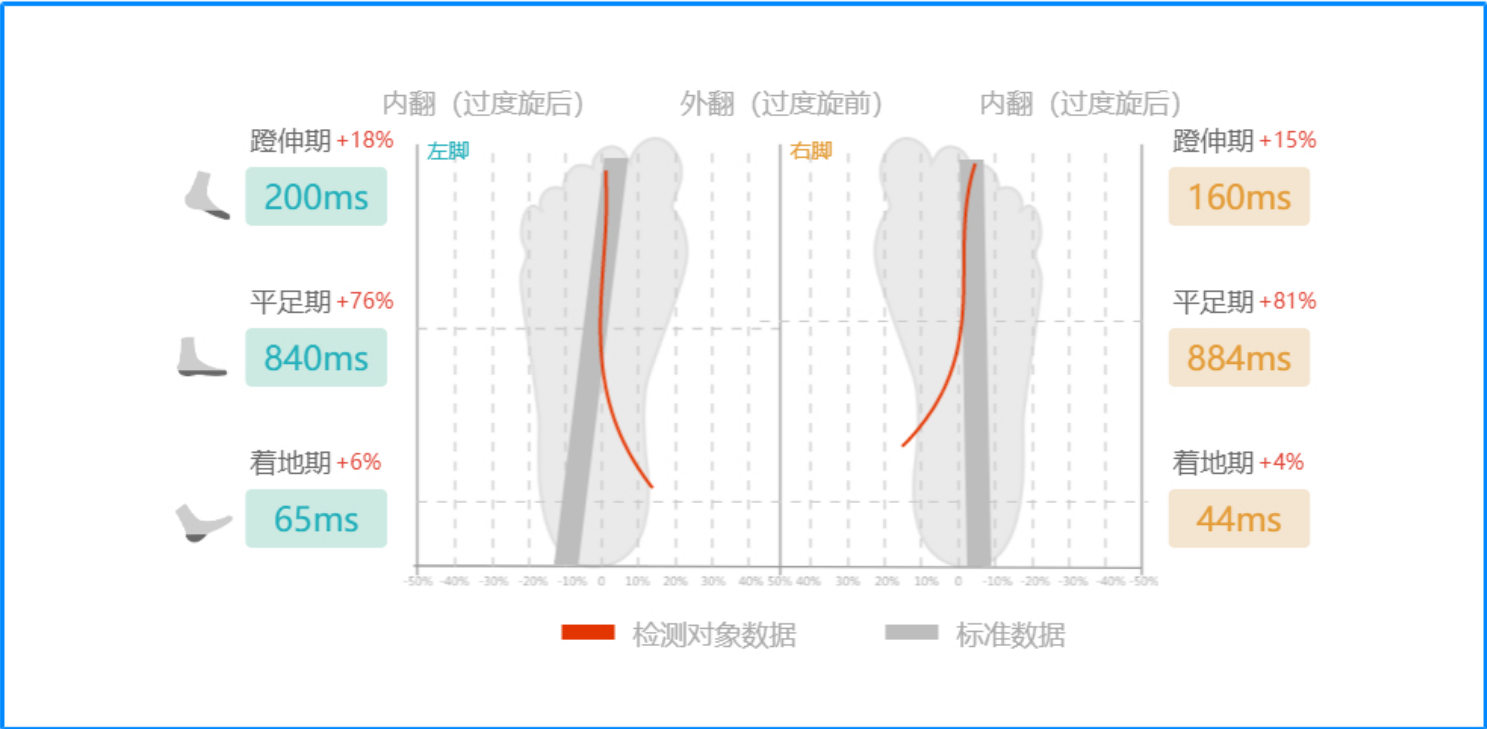

足弓类型

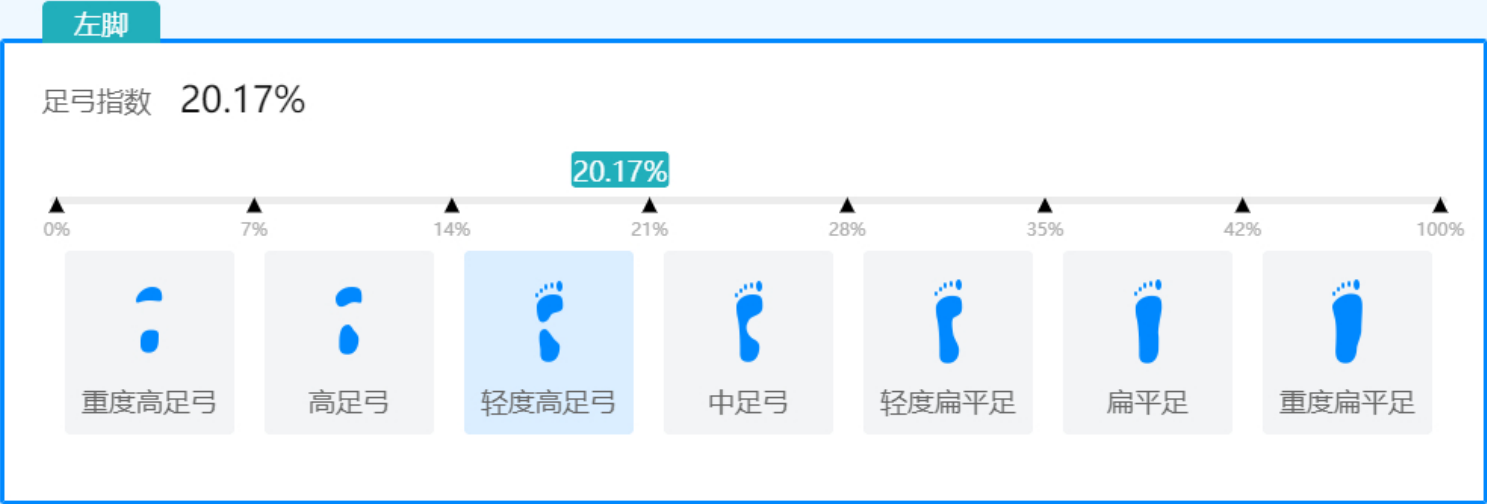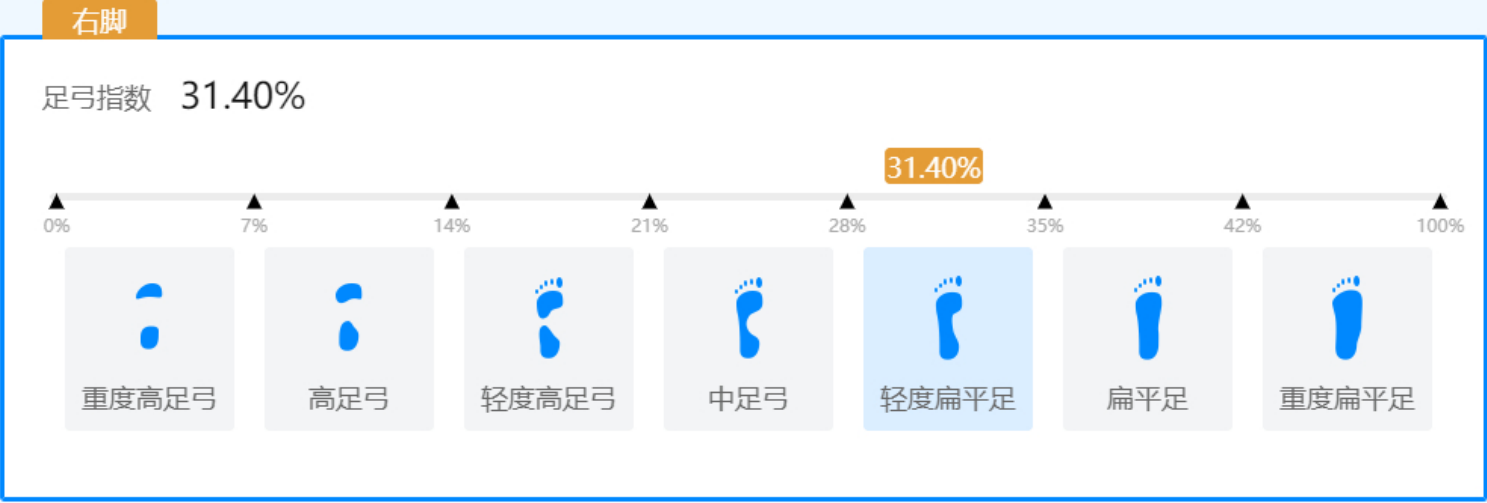

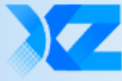

报告结论
