# Supplementary material for: Individualized Corrective Training Based on Precision Biomechanical Assessment for the Prevention of Sports Injuries in Adolescents
Source: Research Square preprint supplement (doi:10.21203/rs.3.rs-8426574/v1), 2026-02-02
Supplement: Supplementary file 148 [file 动态报告-白立慧-20250226111856.pdf › Plantar pressure and gait analysis/soccer/动态报告-白立慧-20250226111856.pdf]

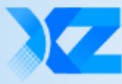

左右脚动态数据

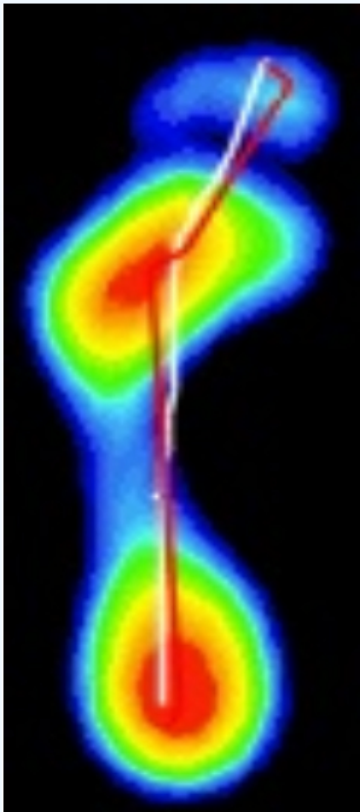

| 第1步      | Cop数据     | 第2步      |
|----------|-----------|----------|
| 190.73   | cop距离【mm】 | 187.48   |
| 19.54    | 步偏脚【°】    | 6.80     |
| 8074.70  | 面积【mm²】   | 8431.90  |
| 19178.42 | 压力【kgf】   | 19183.23 |
| 2.18     | 压强【gr/%】  | 2.15     |
| 29732.69 | 最大压力【kgf】 | 27163.68 |
| 0.23     | 速度【mm/ms】 | 0.22     |

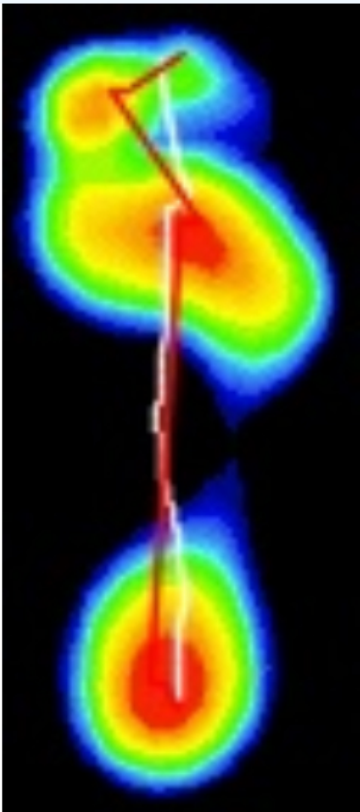

支撑相

左脚

|             |          |
|-------------|----------|
| ● 着地期 5%    |          |
| 时长【ms】      | 46.67    |
| 平均速度【mm/ms】 | 0.13     |
| 最大面积【mm²】   | 2696.25  |
| 最大压力【kgf】   | 4526.52  |
| ● 平足期 87%   |          |
| 时长【ms】      | 766.67   |
| 平均速度【mm/ms】 | 0.17     |
| 最大面积【mm²】   | 11936.63 |
| 最大压力【kgf】   | 29360.95 |
| ● 蹬伸期 8%    |          |
| 时长【ms】      | 66.67    |
| 平均速度【mm/ms】 | 0.32     |
| 最大面积【mm²】   | 3586.88  |
| 最大压力【kgf】   | 5189.48  |

右脚

|             |          |
|-------------|----------|
| ● 着地期 6%    |          |
| 时长【ms】      | 55.00    |
| 平均速度【mm/ms】 | 0.07     |
| 最大面积【mm²】   | 2824.31  |
| 最大压力【kgf】   | 5352.19  |
| ● 平足期 87%   |          |
| 时长【ms】      | 812.00   |
| 平均速度【mm/ms】 | 0.18     |
| 最大面积【mm²】   | 12096.90 |
| 最大压力【kgf】   | 28422.37 |
| ● 蹬伸期 8%    |          |
| 时长【ms】      | 76.00    |
| 平均速度【mm/ms】 | 0.22     |
| 最大面积【mm²】   | 3165.75  |
| 最大压力【kg/f】  | 4190.89  |

内外翻

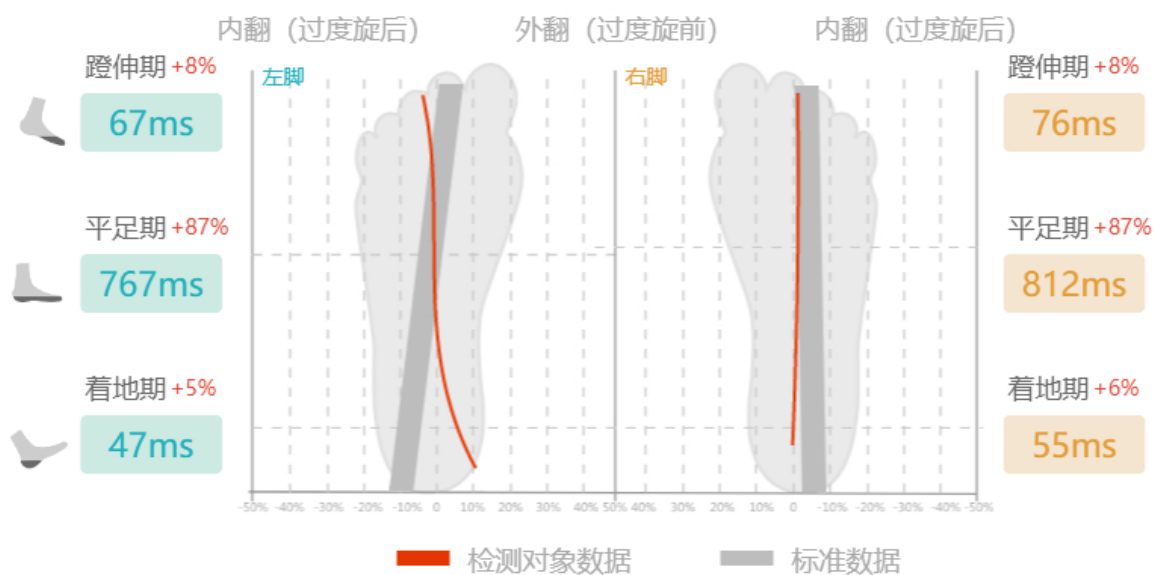

足弓类型

左脚

足弓指数 42.87%

42.87%

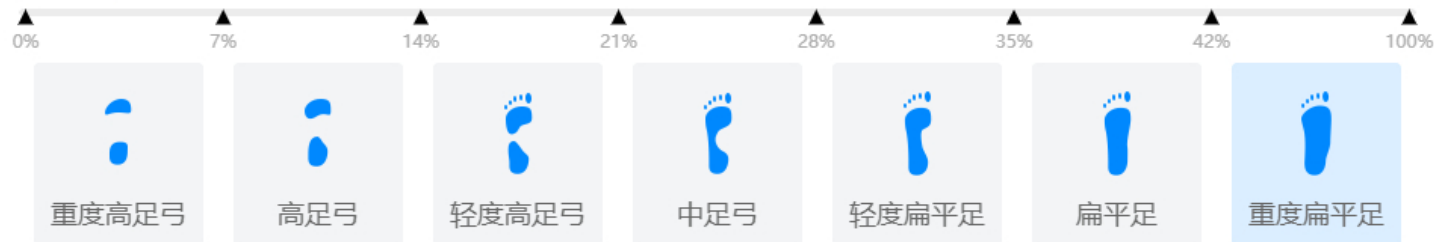

右脚

足弓指数 33.76%

33.76%

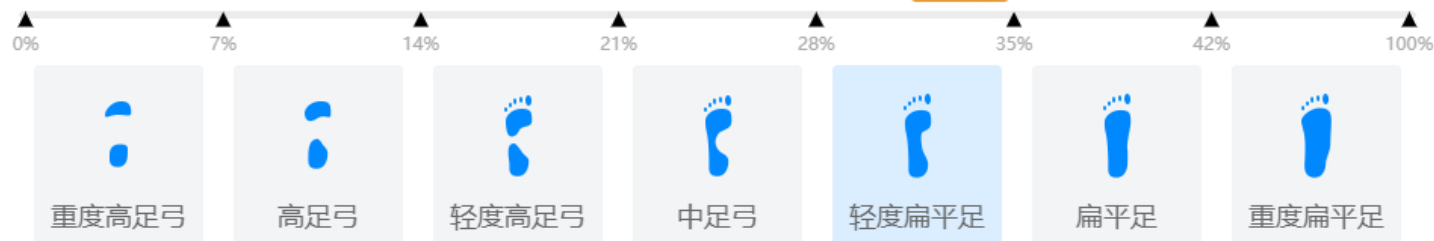

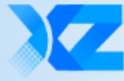

报告结论
