# Supplementary material for: Individualized Corrective Training Based on Precision Biomechanical Assessment for the Prevention of Sports Injuries in Adolescents
Source: Research Square preprint supplement (doi:10.21203/rs.3.rs-8426574/v1), 2026-02-02
Supplement: Supplementary file 149 [file 动态报告-程永慧-20250226144038.pdf › Plantar pressure and gait analysis/soccer/动态报告-程永慧-20250226144038.pdf]

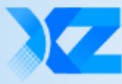

左右脚动态数据

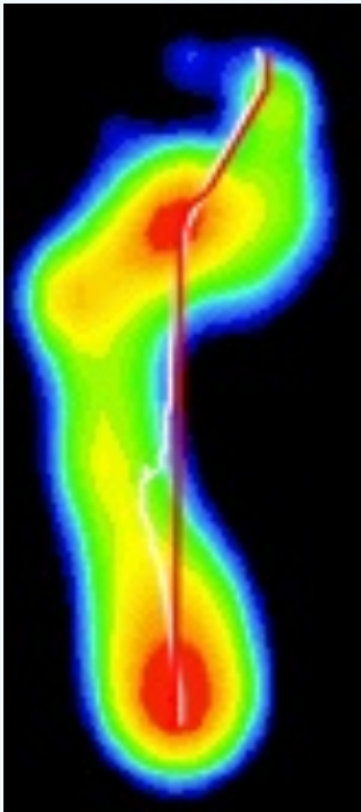

| 第2步      | Cop数据     | 第1步      |
|----------|-----------|----------|
| 225.47   | cop距离【mm】 | 209.76   |
| 1.58     | 步偏脚【°】    | 6.66     |
| 10461.63 | 面积【mm²】   | 10707.84 |
| 30376.72 | 压力【kgf】   | 29722.83 |
| 2.64     | 压强【gr/%】  | 2.56     |
| 50695.04 | 最大压力【kgf】 | 45853.95 |
| 0.21     | 速度【mm/ms】 | 0.21     |

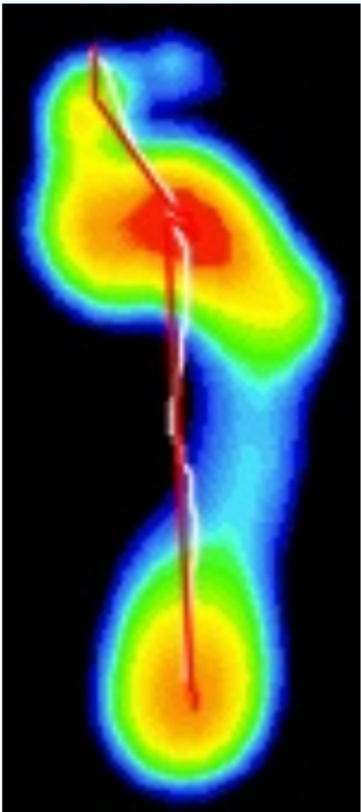

支撑相

左脚

|             |          |
|-------------|----------|
| ● 着地期 9%    |          |
| 时长【ms】      | 84.00    |
| 平均速度【mm/ms】 | 0.18     |
| 最大面积【mm²】   | 4270.95  |
| 最大压力【kgf】   | 9073.14  |
| ● 平足期 78%   |          |
| 时长【ms】      | 760.00   |
| 平均速度【mm/ms】 | 0.18     |
| 最大面积【mm²】   | 16164.45 |
| 最大压力【kgf】   | 48666.45 |
| ● 蹬伸期 14%   |          |
| 时长【ms】      | 136.00   |
| 平均速度【mm/ms】 | 0.34     |
| 最大面积【mm²】   | 7120.35  |
| 最大压力【kgf】   | 18138.43 |

右脚

|             |          |
|-------------|----------|
| ● 着地期 9%    |          |
| 时长【ms】      | 80.00    |
| 平均速度【mm/ms】 | 0.19     |
| 最大面积【mm²】   | 4950.45  |
| 最大压力【kgf】   | 11197.67 |
| ● 平足期 77%   |          |
| 时长【ms】      | 720.00   |
| 平均速度【mm/ms】 | 0.19     |
| 最大面积【mm²】   | 15917.40 |
| 最大压力【kgf】   | 46567.02 |
| ● 蹬伸期 14%   |          |
| 时长【ms】      | 136.00   |
| 平均速度【mm/ms】 | 0.31     |
| 最大面积【mm²】   | 6659.55  |
| 最大压力【kg/f】  | 17598.84 |

内外翻

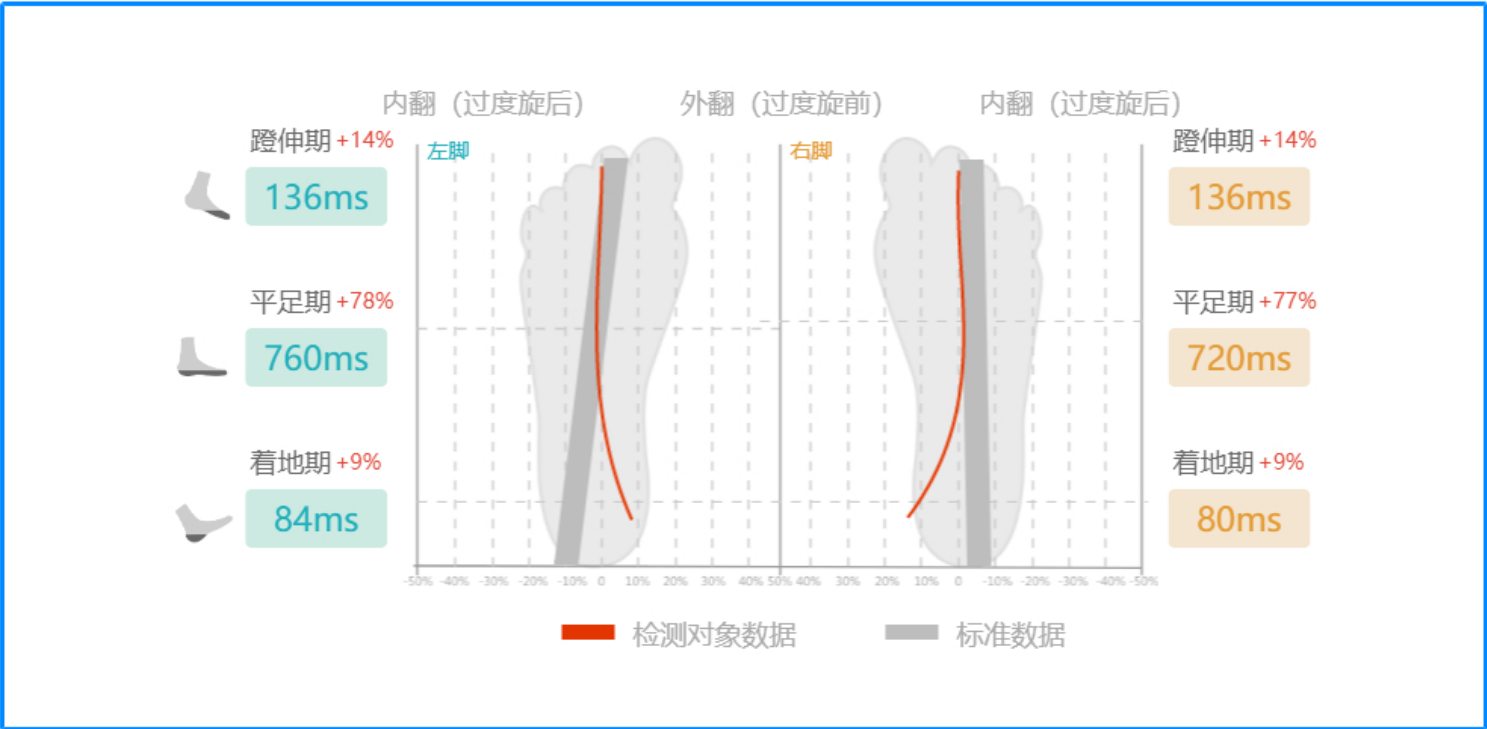

足弓类型

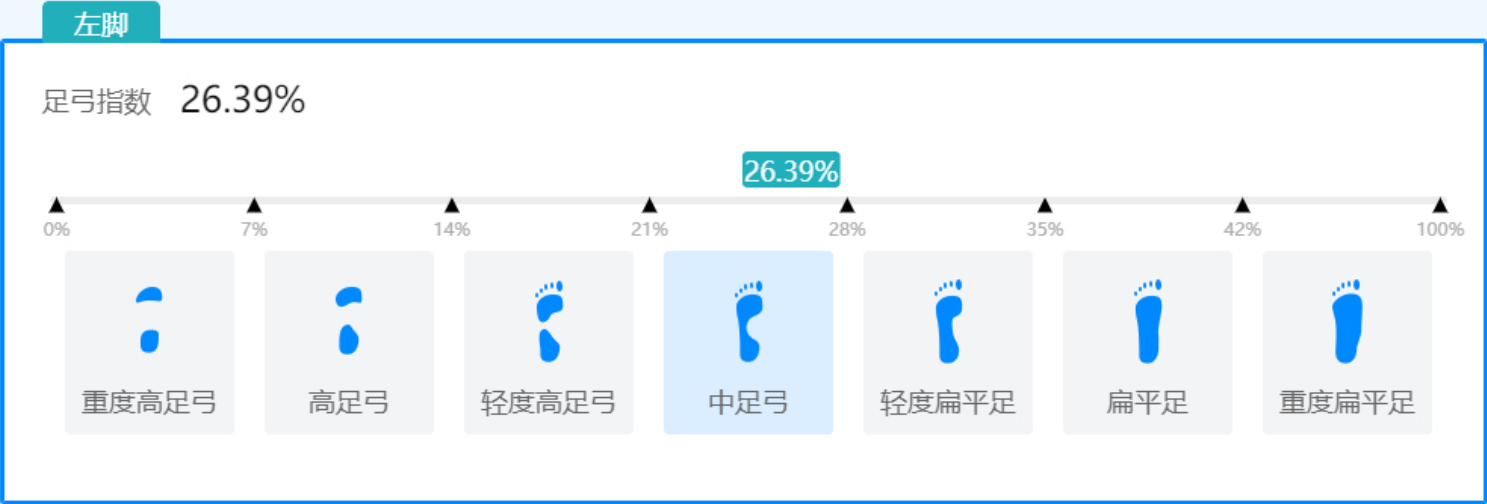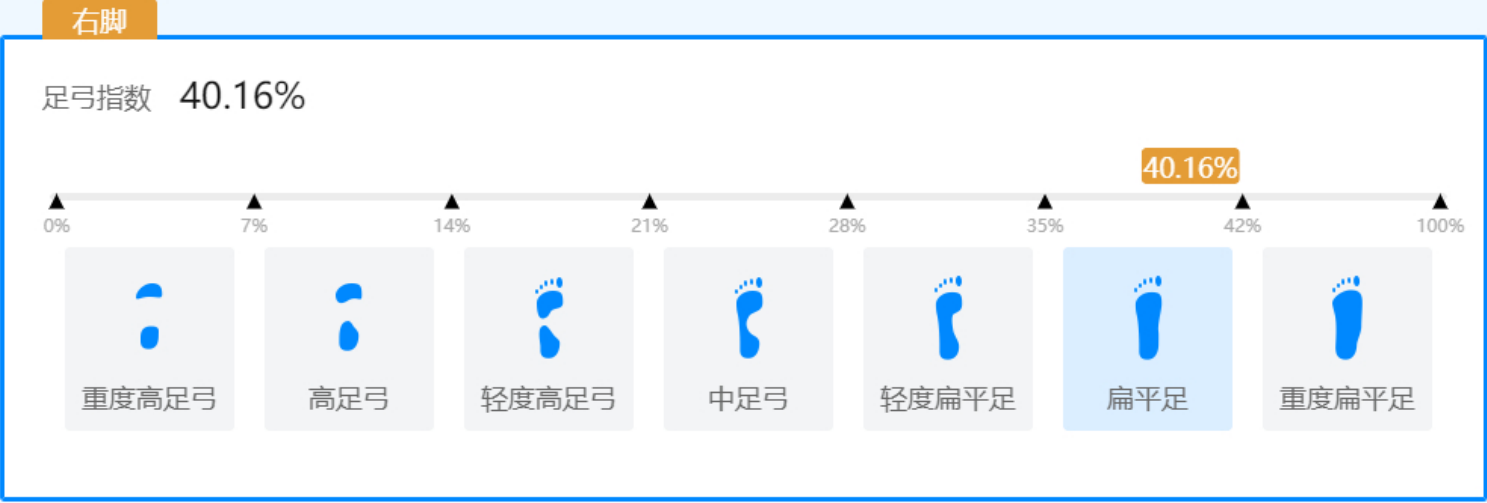

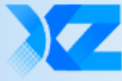

报告结论
