# Supplementary material for: Individualized Corrective Training Based on Precision Biomechanical Assessment for the Prevention of Sports Injuries in Adolescents
Source: Research Square preprint supplement (doi:10.21203/rs.3.rs-8426574/v1), 2026-02-02

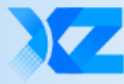

左右脚动态数据

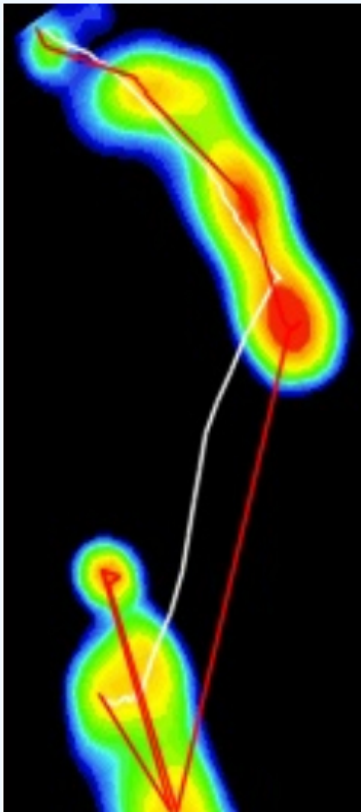

| 第5步      | Cop数据     | 第1步      |
|----------|-----------|----------|
| 426.56   | cop距离【mm】 | 219.80   |
| -33.38   | 步偏脚【°】    | 0.55     |
| 9066.09  | 面积【mm²】   | 7360.43  |
| 21302.60 | 压力【kgf】   | 20429.22 |
| 2.20     | 压强【gr/%】  | 2.55     |
| 35008.50 | 最大压力【kgf】 | 28847.53 |
| 0.24     | 速度【mm/ms】 | 0.21     |

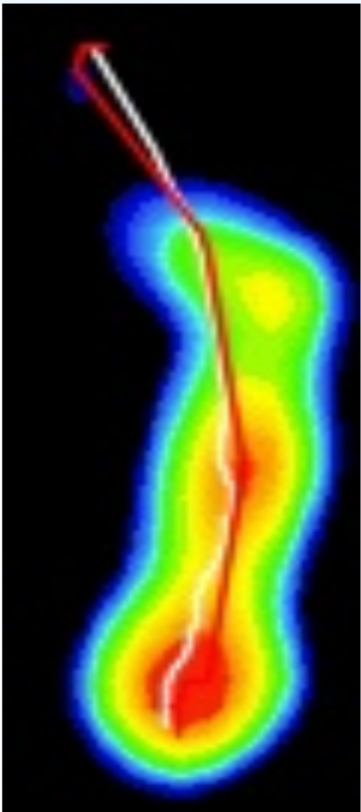

支撑相

左脚

|             |          |
|-------------|----------|
| ● 着地期 6%    |          |
| 时长【ms】      | 100.00   |
| 平均速度【mm/ms】 | 0.20     |
| 最大面积【mm²】   | 4207.50  |
| 最大压力【kgf】   | 3930.65  |
| ● 平足期 77%   |          |
| 时长【ms】      | 1360.00  |
| 平均速度【mm/ms】 | 0.23     |
| 最大面积【mm²】   | 16461.00 |
| 最大压力【kgf】   | 35008.50 |
| ● 蹬伸期 17%   |          |
| 时长【ms】      | 300.00   |
| 平均速度【mm/ms】 | 0.28     |
| 最大面积【mm²】   | 11742.75 |
| 最大压力【kgf】   | 31579.51 |

右脚

|             |          |
|-------------|----------|
| ● 着地期 7%    |          |
| 时长【ms】      | 91.43    |
| 平均速度【mm/ms】 | 0.30     |
| 最大面积【mm²】   | 3875.14  |
| 最大压力【kgf】   | 5943.46  |
| ● 平足期 77%   |          |
| 时长【ms】      | 1014.29  |
| 平均速度【mm/ms】 | 0.23     |
| 最大面积【mm²】   | 15095.25 |
| 最大压力【kgf】   | 35391.01 |
| ● 蹬伸期 16%   |          |
| 时长【ms】      | 225.71   |
| 平均速度【mm/ms】 | 0.37     |
| 最大面积【mm²】   | 7779.86  |
| 最大压力【kgf】   | 18079.24 |

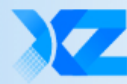

内外翻

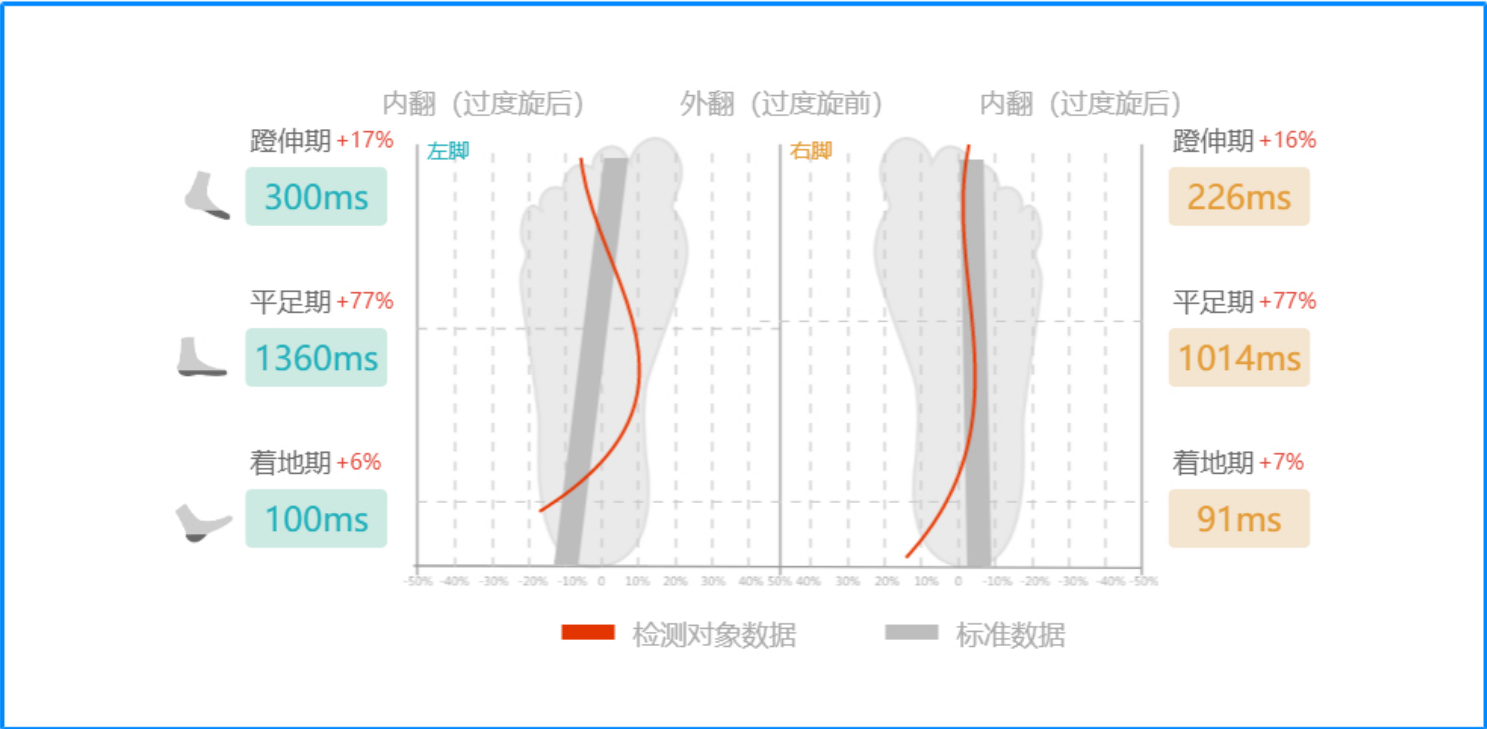

足弓类型

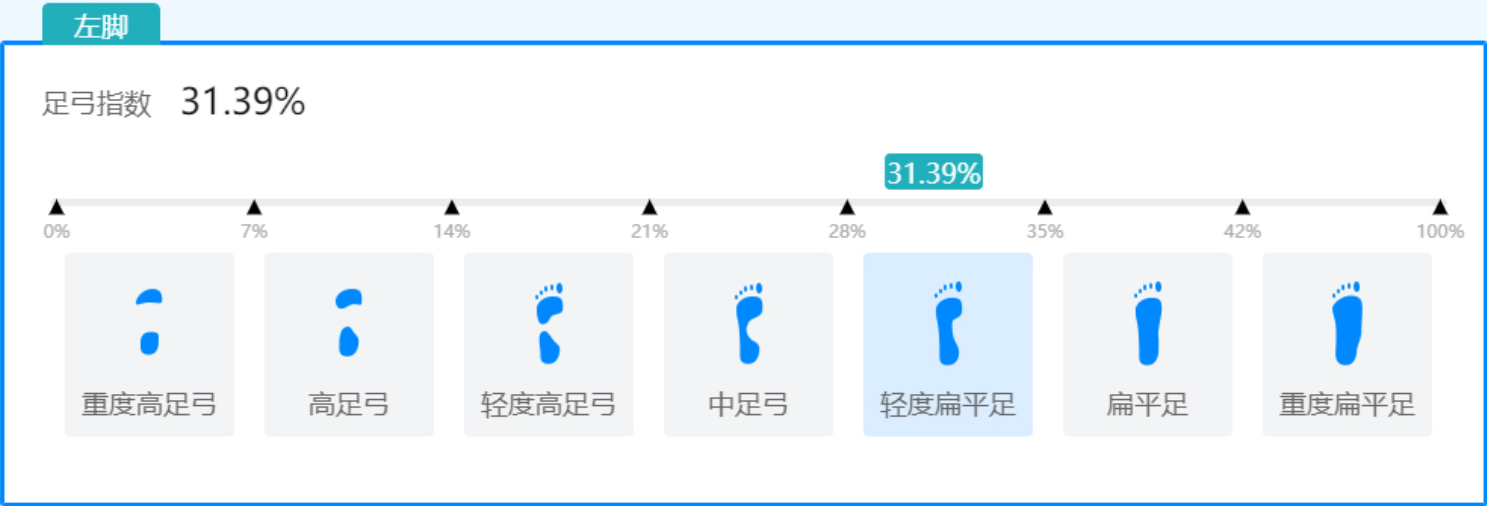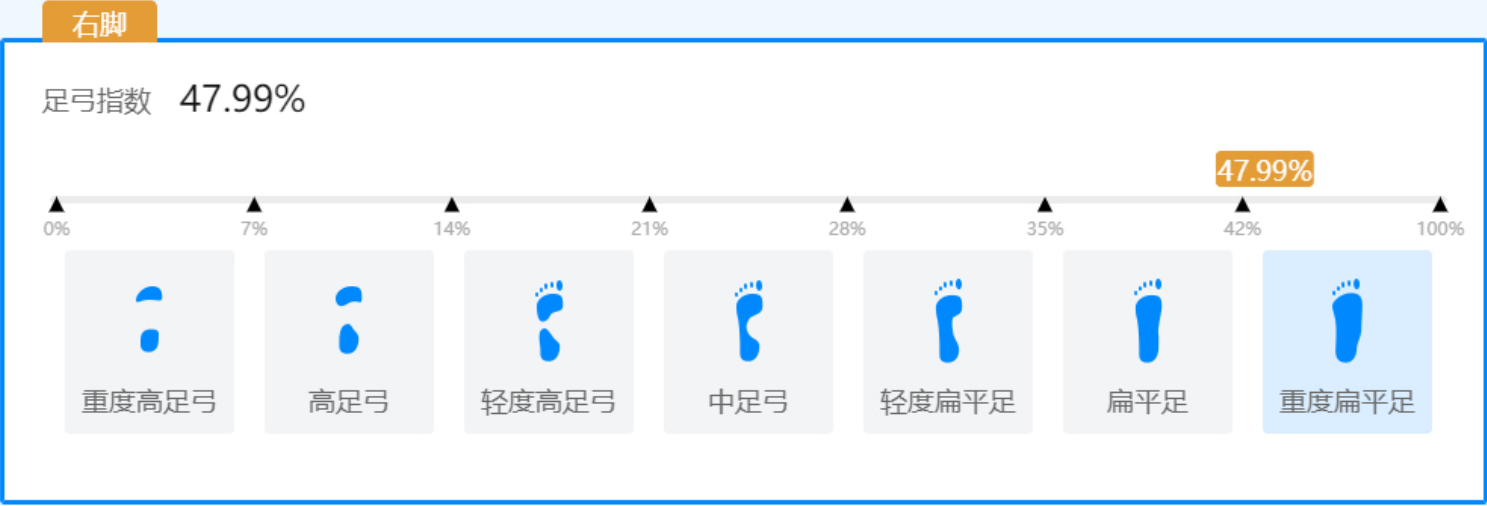



报告结论

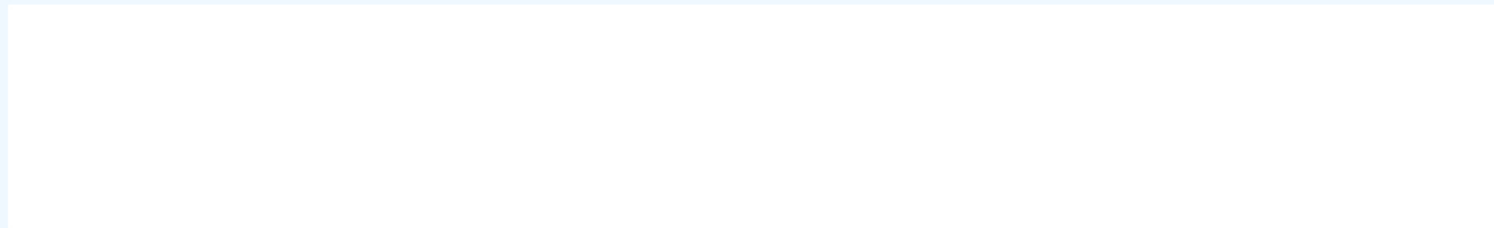

Supplement: Supplementary file 150 [file 动态报告-罗桃红-20250226134500.pdf › Plantar pressure and gait analysis/soccer/动态报告-罗桃红-20250226134500.pdf]
