# Supplementary material for: Individualized Corrective Training Based on Precision Biomechanical Assessment for the Prevention of Sports Injuries in Adolescents
Source: Research Square preprint supplement (doi:10.21203/rs.3.rs-8426574/v1), 2026-02-02
Supplement: Supplementary file 151 [file 动态报告-袁欣羽-20250226122558.pdf › Plantar pressure and gait analysis/soccer/动态报告-袁欣羽-20250226122558.pdf]

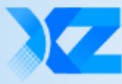

左右脚动态数据

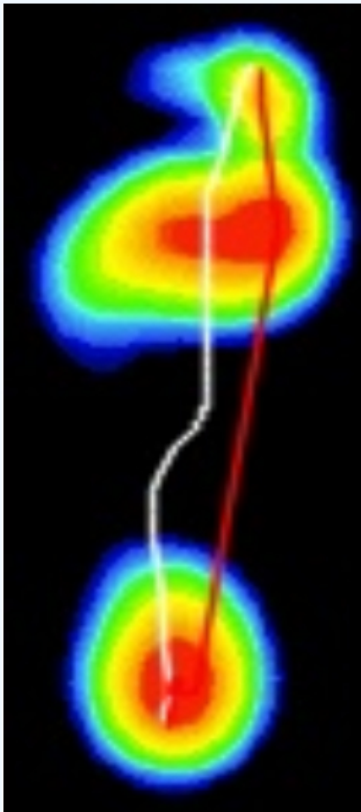

| 第2步      | Cop数据     | 第1步      |
|----------|-----------|----------|
| 208.45   | cop距离【mm】 | 206.36   |
| 5.15     | 步偏脚【°】    | 8.75     |
| 8425.10  | 面积【mm²】   | 9362.80  |
| 20557.80 | 压力【kgf】   | 23035.84 |
| 2.26     | 压强【gr/%】  | 2.29     |
| 29379.20 | 最大压力【kgf】 | 35983.38 |
| 0.22     | 速度【mm/ms】 | 0.21     |

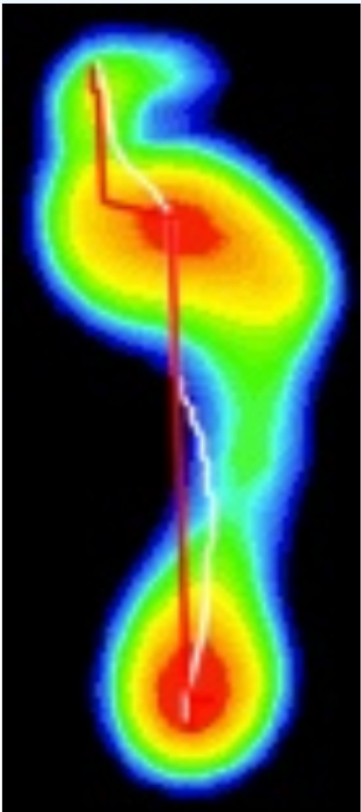

支撑相

左脚

|             |          |
|-------------|----------|
| ● 着地期 9%    |          |
| 时长【ms】      | 84.00    |
| 平均速度【mm/ms】 | 0.15     |
| 最大面积【mm²】   | 3965.85  |
| 最大压力【kgf】   | 8137.31  |
| ● 平足期 79%   |          |
| 时长【ms】      | 760.00   |
| 平均速度【mm/ms】 | 0.19     |
| 最大面积【mm²】   | 13476.60 |
| 最大压力【kgf】   | 34021.86 |
| ● 蹬伸期 12%   |          |
| 时长【ms】      | 120.00   |
| 平均速度【mm/ms】 | 0.27     |
| 最大面积【mm²】   | 6165.90  |
| 最大压力【kgf】   | 13777.33 |

右脚

|             |          |
|-------------|----------|
| ● 着地期 9%    |          |
| 时长【ms】      | 84.00    |
| 平均速度【mm/ms】 | 0.10     |
| 最大面积【mm²】   | 3292.20  |
| 最大压力【kgf】   | 7224.26  |
| ● 平足期 83%   |          |
| 时长【ms】      | 812.00   |
| 平均速度【mm/ms】 | 0.20     |
| 最大面积【mm²】   | 14188.95 |
| 最大压力【kgf】   | 35176.69 |
| ● 蹬伸期 9%    |          |
| 时长【ms】      | 88.00    |
| 平均速度【mm/ms】 | 0.21     |
| 最大面积【mm²】   | 4262.85  |
| 最大压力【kg/f】  | 7284.84  |

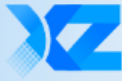

内外翻

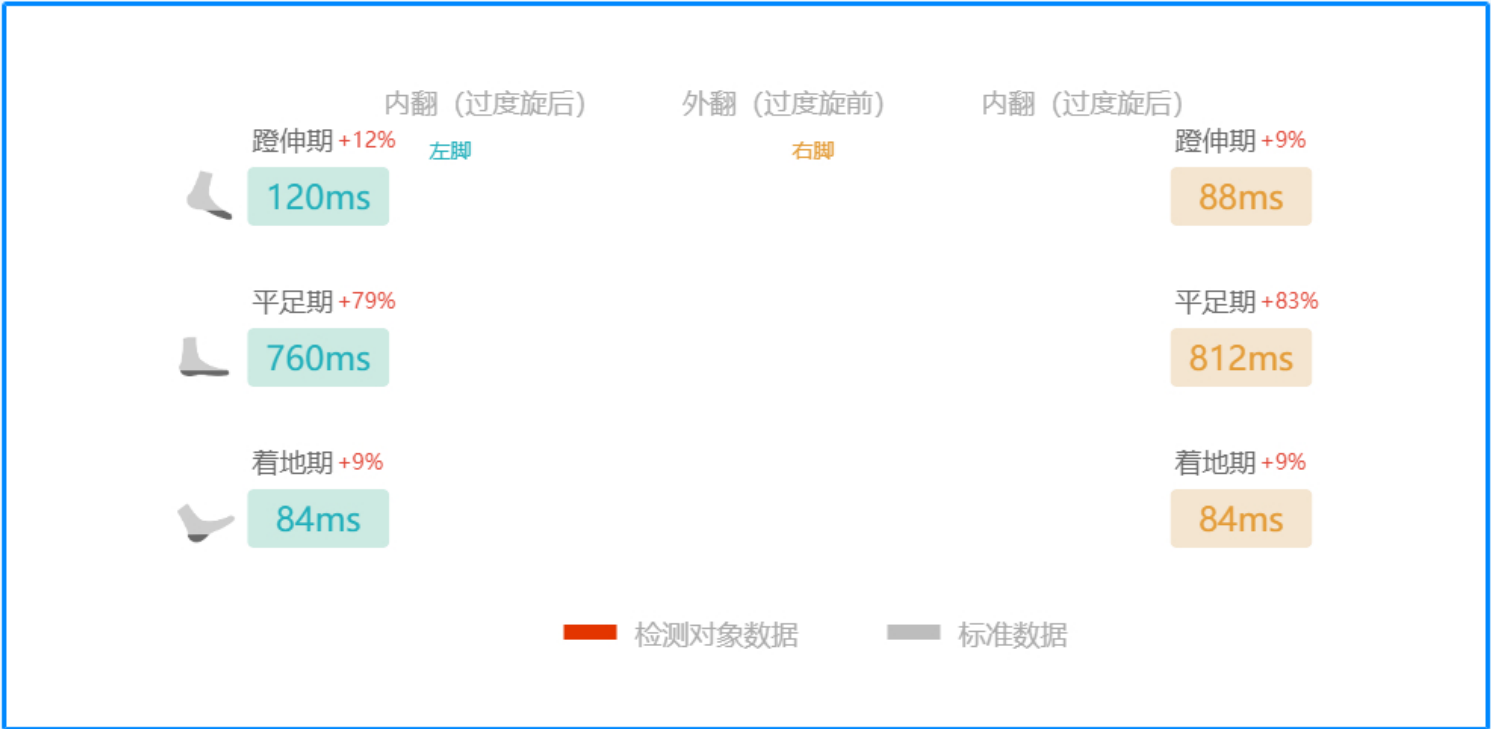

足弓类型

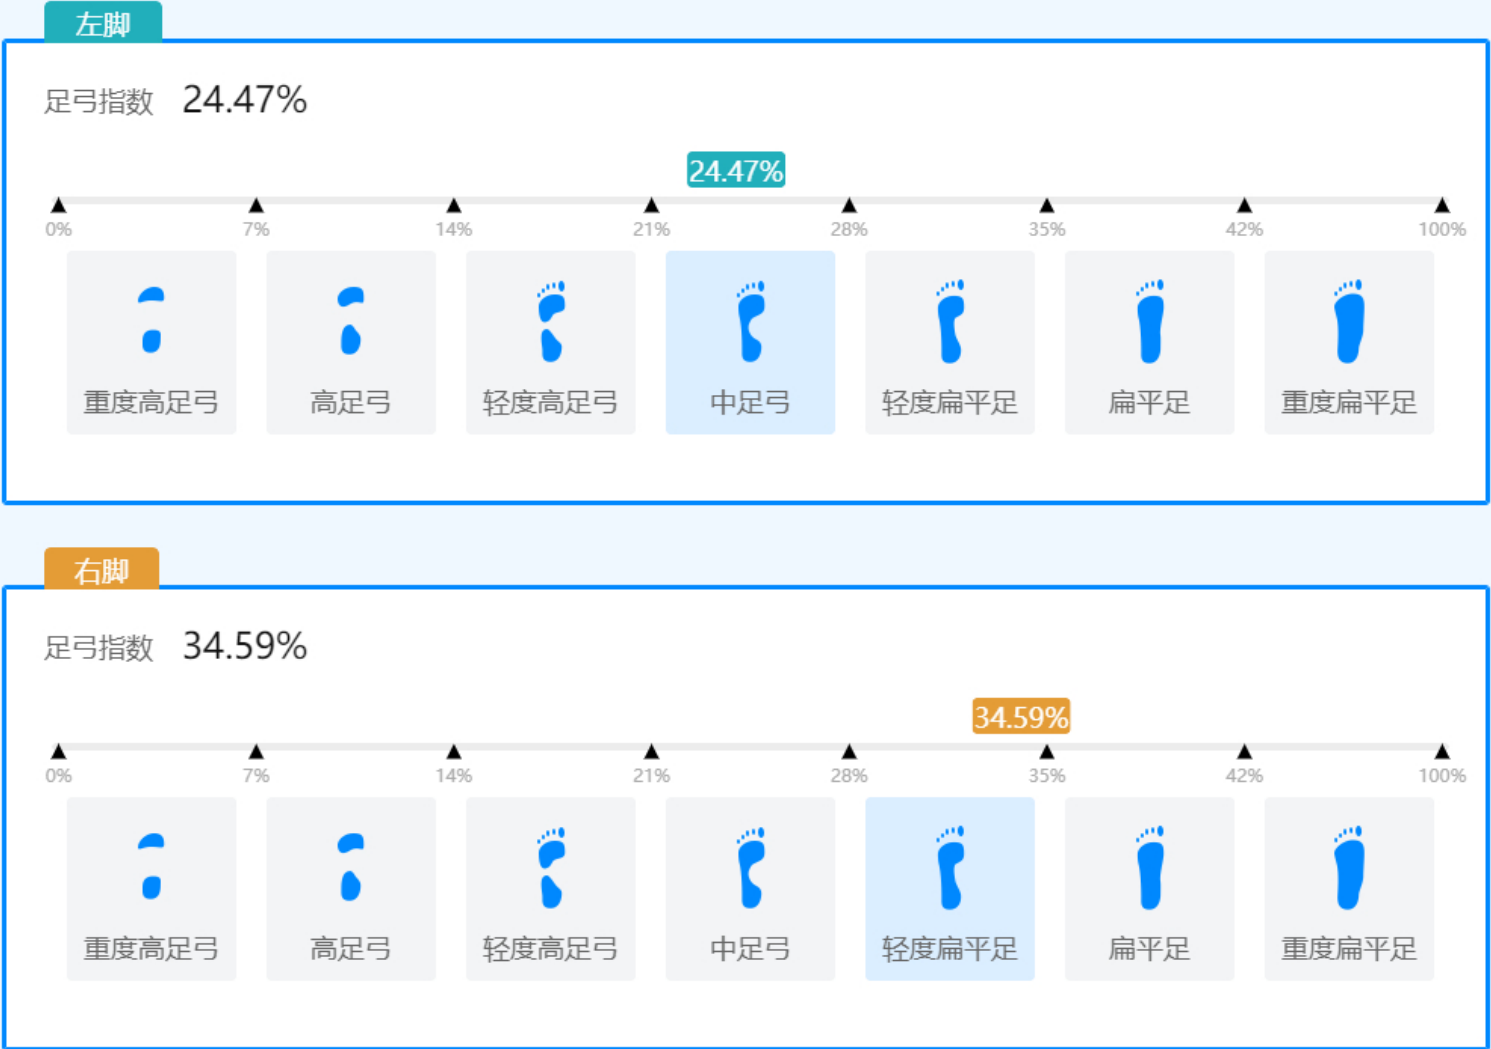

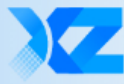

报告结论
