# Supplementary material for: Individualized Corrective Training Based on Precision Biomechanical Assessment for the Prevention of Sports Injuries in Adolescents
Source: Research Square preprint supplement (doi:10.21203/rs.3.rs-8426574/v1), 2026-02-02

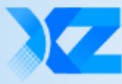

左右脚动态数据

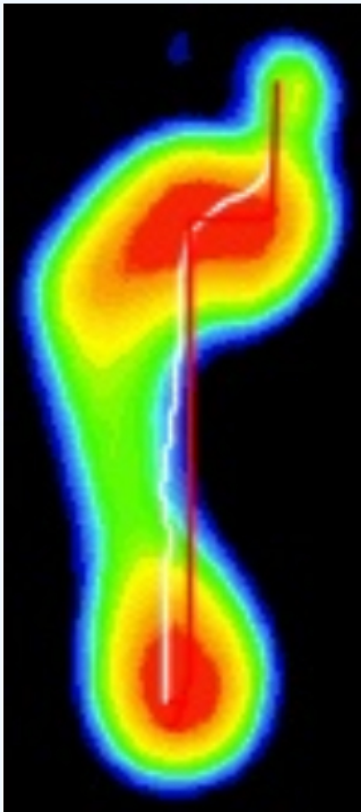

| 第3步      | Cop数据     | 第1步      |
|----------|-----------|----------|
| 190.76   | cop距离【mm】 | 170.99   |
| 12.61    | 步偏脚【°】    | 14.59    |
| 11481.42 | 面积【mm²】   | 13316.90 |
| 31317.43 | 压力【kgf】   | 36810.70 |
| 2.56     | 压强【gr/%】  | 2.56     |
| 46707.60 | 最大压力【kgf】 | 49453.48 |
| 0.23     | 速度【mm/ms】 | 0.23     |

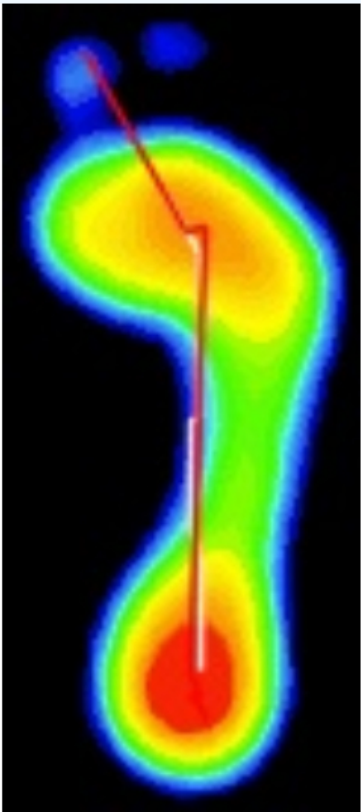

支撑相

左脚

|             |          |
|-------------|----------|
| ● 着地期 6%    |          |
| 时长【ms】      | 55.00    |
| 平均速度【mm/ms】 | 0.11     |
| 最大面积【mm²】   | 4179.94  |
| 最大压力【kgf】   | 9282.11  |
| ● 平足期 81%   |          |
| 时长【ms】      | 735.00   |
| 平均速度【mm/ms】 | 0.20     |
| 最大面积【mm²】   | 15824.81 |
| 最大压力【kgf】   | 48112.09 |
| ● 蹬伸期 13%   |          |
| 时长【ms】      | 115.00   |
| 平均速度【mm/ms】 | 0.27     |
| 最大面积【mm²】   | 7152.19  |
| 最大压力【kgf】   | 19767.65 |

右脚

|             |          |
|-------------|----------|
| ● 着地期 5%    |          |
| 时长【ms】      | 43.33    |
| 平均速度【mm/ms】 | 0.12     |
| 最大面积【mm²】   | 3730.88  |
| 最大压力【kgf】   | 6775.72  |
| ● 平足期 84%   |          |
| 时长【ms】      | 730.00   |
| 平均速度【mm/ms】 | 0.19     |
| 最大面积【mm²】   | 15826.88 |
| 最大压力【kgf】   | 47570.25 |
| ● 蹬伸期 12%   |          |
| 时长【ms】      | 103.33   |
| 平均速度【mm/ms】 | 0.24     |
| 最大面积【mm²】   | 5960.25  |
| 最大压力【kgf】   | 16918.88 |

内外翻

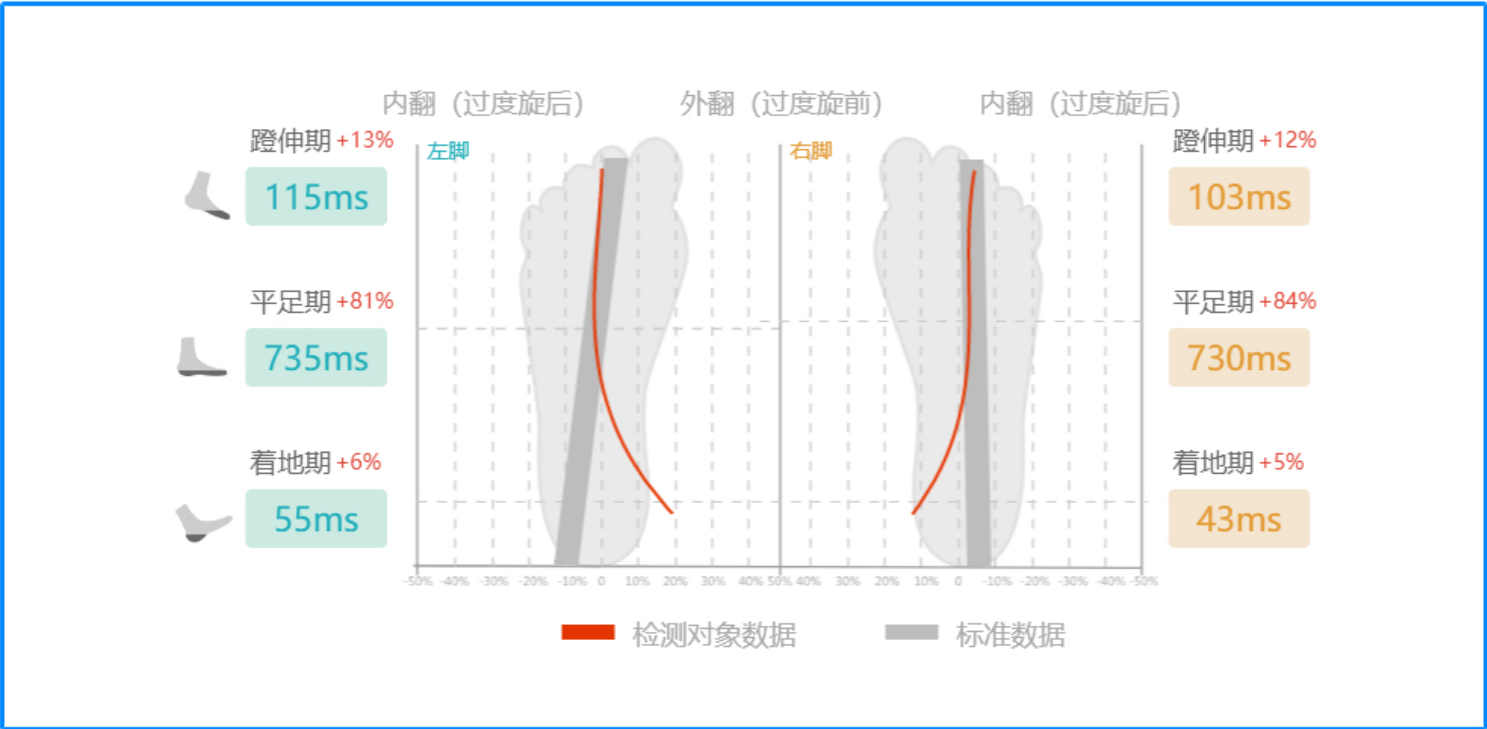

足弓类型

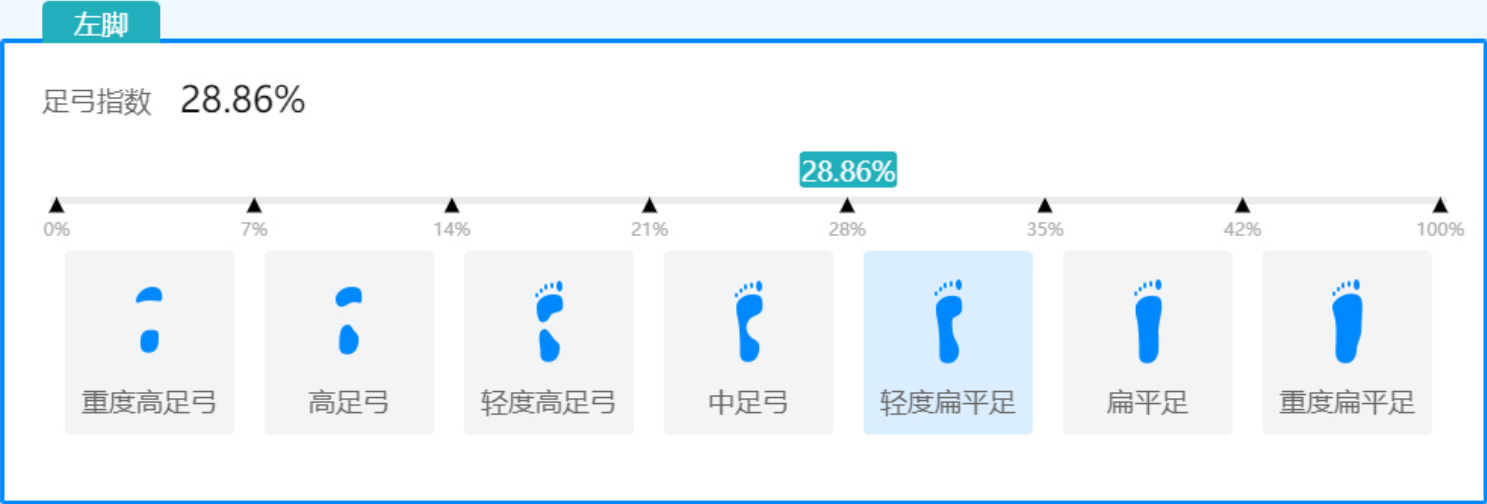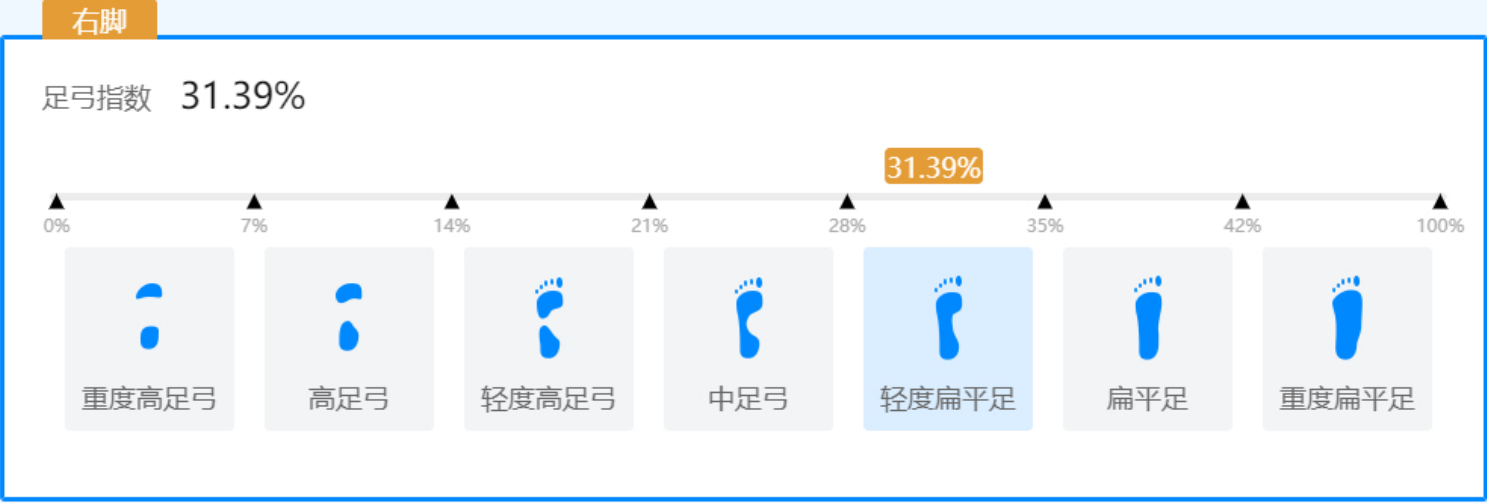

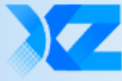

报告结论

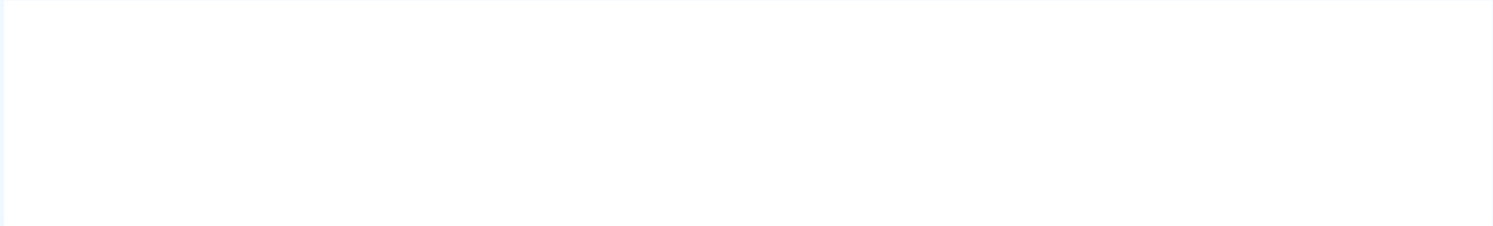

Supplement: Supplementary file 152 [file 动态报告-赵亮-20250226120007.pdf › Plantar pressure and gait analysis/soccer/动态报告-赵亮-20250226120007.pdf]
