# Supplementary material for: Individualized Corrective Training Based on Precision Biomechanical Assessment for the Prevention of Sports Injuries in Adolescents
Source: Research Square preprint supplement (doi:10.21203/rs.3.rs-8426574/v1), 2026-02-02
Supplement: Supplementary file 153 [file 动态报告-赵院林-20250226112453.pdf › Plantar pressure and gait analysis/soccer/动态报告-赵院林-20250226112453.pdf]

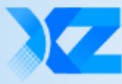

左右脚动态数据

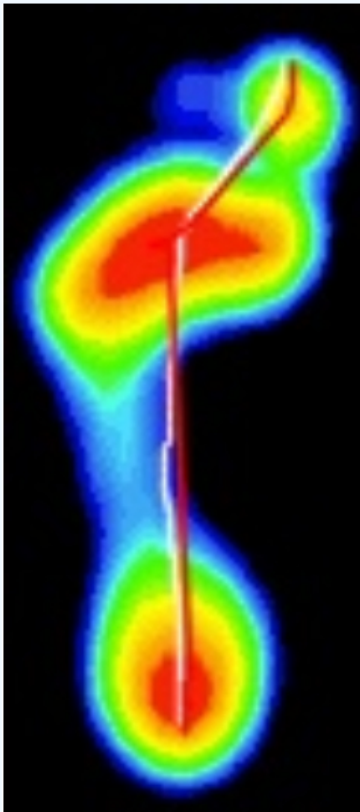

| 第1步      | Cop数据     | 第2步      |
|----------|-----------|----------|
| 206.16   | cop距离【mm】 | 206.48   |
| 4.40     | 步偏脚【°】    | 11.69    |
| 7670.61  | 面积【mm²】   | 8213.67  |
| 20691.75 | 压力【kgf】   | 22368.34 |
| 2.53     | 压强【gr/%】  | 2.55     |
| 35540.04 | 最大压力【kgf】 | 35120.48 |
| 0.23     | 速度【mm/ms】 | 0.22     |

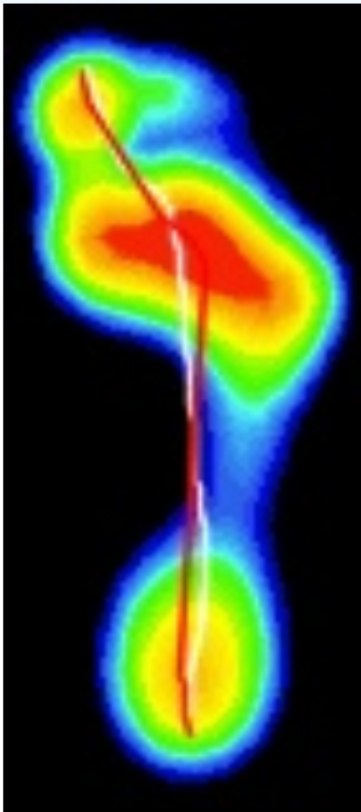

支撑相

左脚

|             |          |
|-------------|----------|
| ● 着地期 17%   |          |
| 时长【ms】      | 152.00   |
| 平均速度【mm/ms】 | 0.10     |
| 最大面积【mm²】   | 3866.85  |
| 最大压力【kgf】   | 11975.68 |
| ● 平足期 70%   |          |
| 时长【ms】      | 640.00   |
| 平均速度【mm/ms】 | 0.23     |
| 最大面积【mm²】   | 12973.50 |
| 最大压力【kgf】   | 35279.44 |
| ● 蹬伸期 13%   |          |
| 时长【ms】      | 124.00   |
| 平均速度【mm/ms】 | 0.31     |
| 最大面积【mm²】   | 5884.20  |
| 最大压力【kgf】   | 13254.53 |

右脚

|             |          |
|-------------|----------|
| ● 着地期 11%   |          |
| 时长【ms】      | 104.00   |
| 平均速度【mm/ms】 | 0.12     |
| 最大面积【mm²】   | 3690.90  |
| 最大压力【kgf】   | 10041.50 |
| ● 平足期 80%   |          |
| 时长【ms】      | 712.00   |
| 平均速度【mm/ms】 | 0.21     |
| 最大面积【mm²】   | 13503.60 |
| 最大压力【kgf】   | 36028.89 |
| ● 蹬伸期 9%    |          |
| 时长【ms】      | 80.00    |
| 平均速度【mm/ms】 | 0.34     |
| 最大面积【mm²】   | 4677.30  |
| 最大压力【kg/f】  | 7407.93  |

内外翻

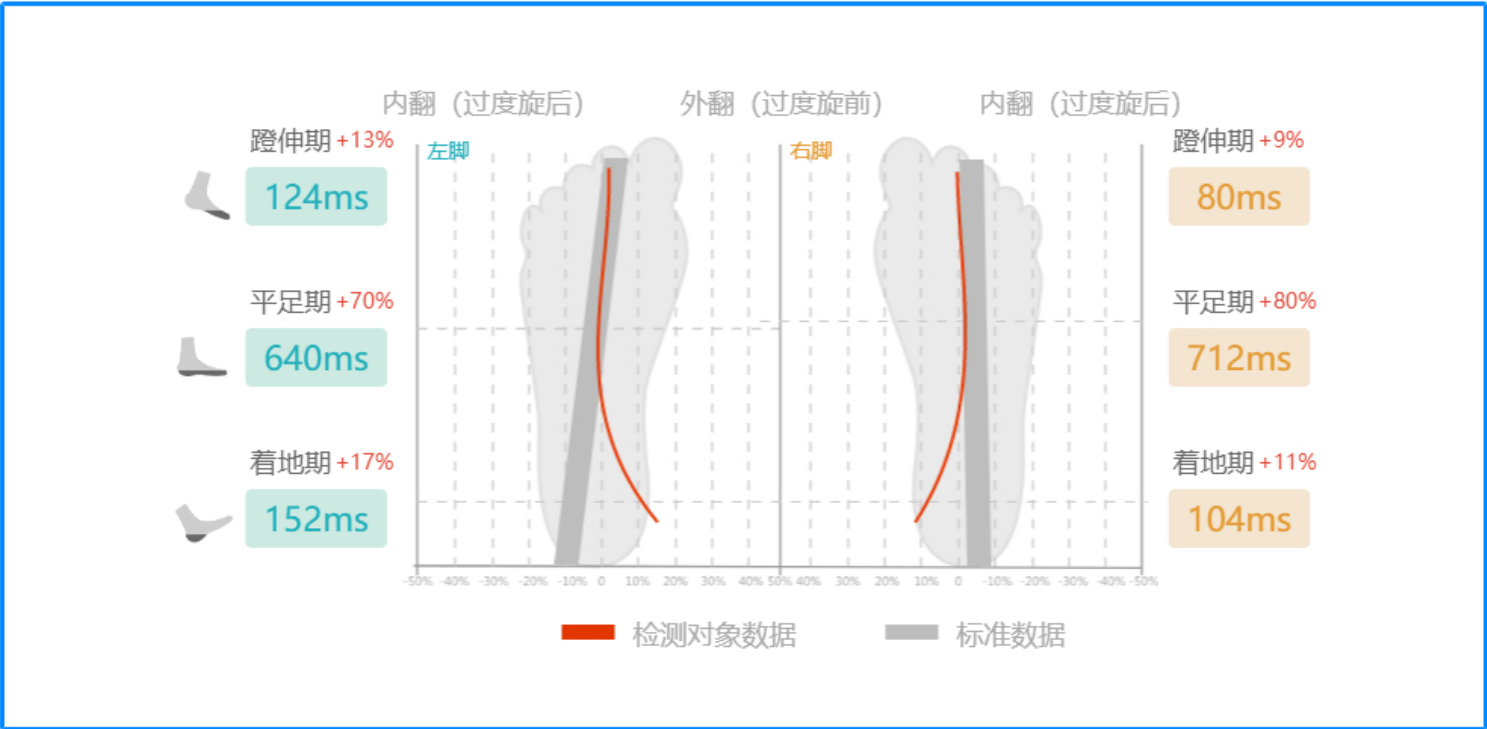

足弓类型

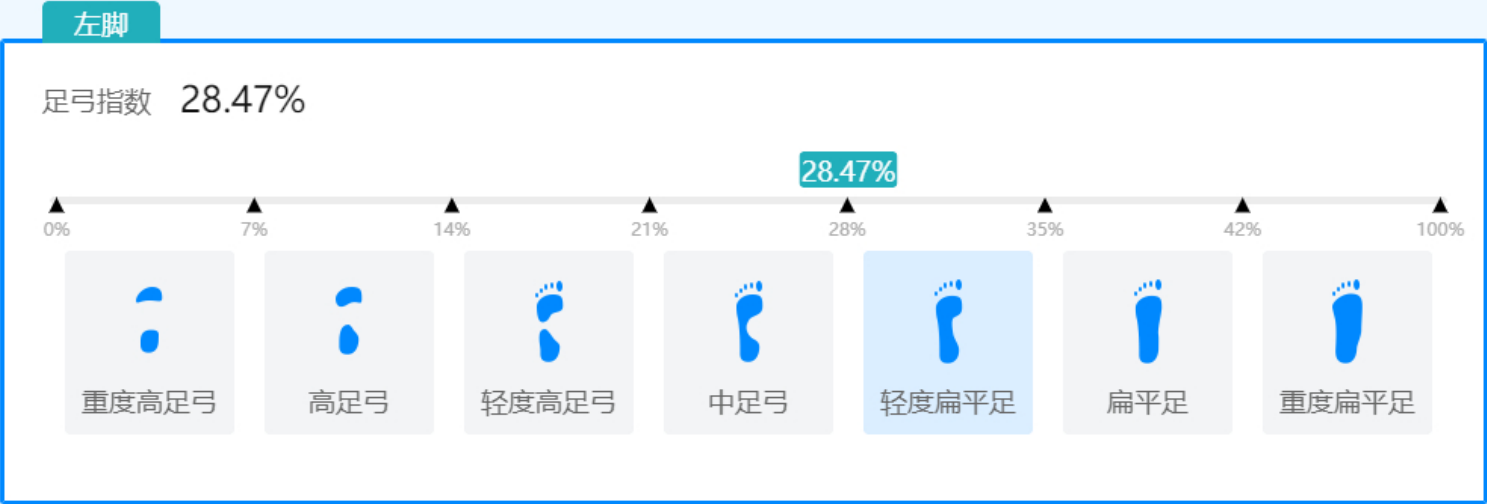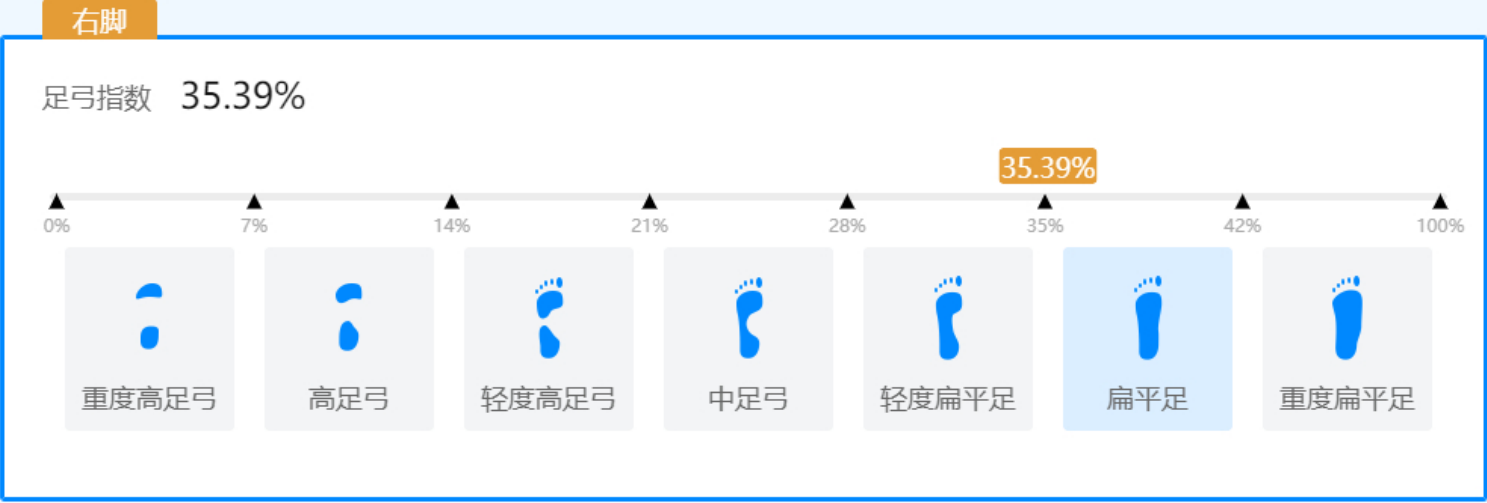

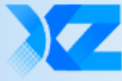

报告结论
