# Supplementary material for: Individualized Corrective Training Based on Precision Biomechanical Assessment for the Prevention of Sports Injuries in Adolescents
Source: Research Square preprint supplement (doi:10.21203/rs.3.rs-8426574/v1), 2026-02-02
Supplement: Supplementary file 154 [file 动态报告-陈明慧-20250226132836.pdf › Plantar pressure and gait analysis/soccer/动态报告-陈明慧-20250226132836.pdf]

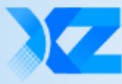

左右脚动态数据

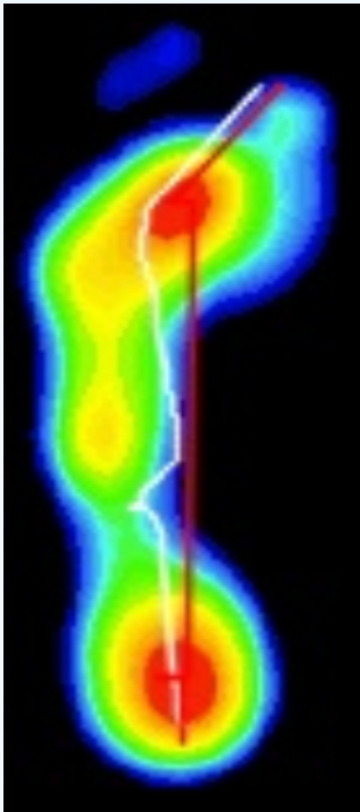

| 第2步      | Cop数据     | 第1步      |
|----------|-----------|----------|
| 241.92   | cop距离【mm】 | 257.18   |
| 1.39     | 步偏脚【°】    | 9.77     |
| 10459.19 | 面积【mm²】   | 9952.01  |
| 28824.23 | 压力【kgf】   | 26364.24 |
| 2.59     | 压强【gr/%】  | 2.42     |
| 46900.02 | 最大压力【kgf】 | 39241.80 |
| 0.23     | 速度【mm/ms】 | 0.25     |

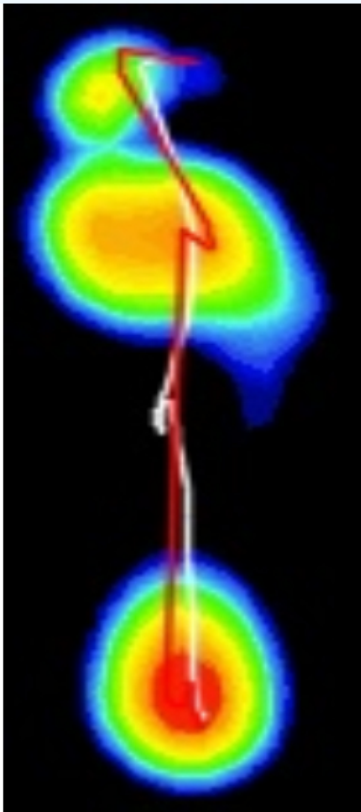

支撑相

左脚

|             |          |
|-------------|----------|
| ● 着地期 16%   |          |
| 时长【ms】      | 168.00   |
| 平均速度【mm/ms】 | 0.19     |
| 最大面积【mm²】   | 5441.85  |
| 最大压力【kgf】   | 13335.63 |
| ● 平足期 70%   |          |
| 时长【ms】      | 748.00   |
| 平均速度【mm/ms】 | 0.18     |
| 最大面积【mm²】   | 16135.20 |
| 最大压力【kgf】   | 44614.22 |
| ● 蹬伸期 14%   |          |
| 时长【ms】      | 148.00   |
| 平均速度【mm/ms】 | 0.35     |
| 最大面积【mm²】   | 6745.05  |
| 最大压力【kgf】   | 17646.61 |

右脚

|             |          |
|-------------|----------|
| ● 着地期 12%   |          |
| 时长【ms】      | 128.00   |
| 平均速度【mm/ms】 | 0.13     |
| 最大面积【mm²】   | 4581.45  |
| 最大压力【kgf】   | 11730.66 |
| ● 平足期 74%   |          |
| 时长【ms】      | 792.00   |
| 平均速度【mm/ms】 | 0.19     |
| 最大面积【mm²】   | 15870.60 |
| 最大压力【kgf】   | 45103.77 |
| ● 蹬伸期 14%   |          |
| 时长【ms】      | 156.00   |
| 平均速度【mm/ms】 | 0.34     |
| 最大面积【mm²】   | 7801.65  |
| 最大压力【kg/f】  | 20975.32 |

内外翻

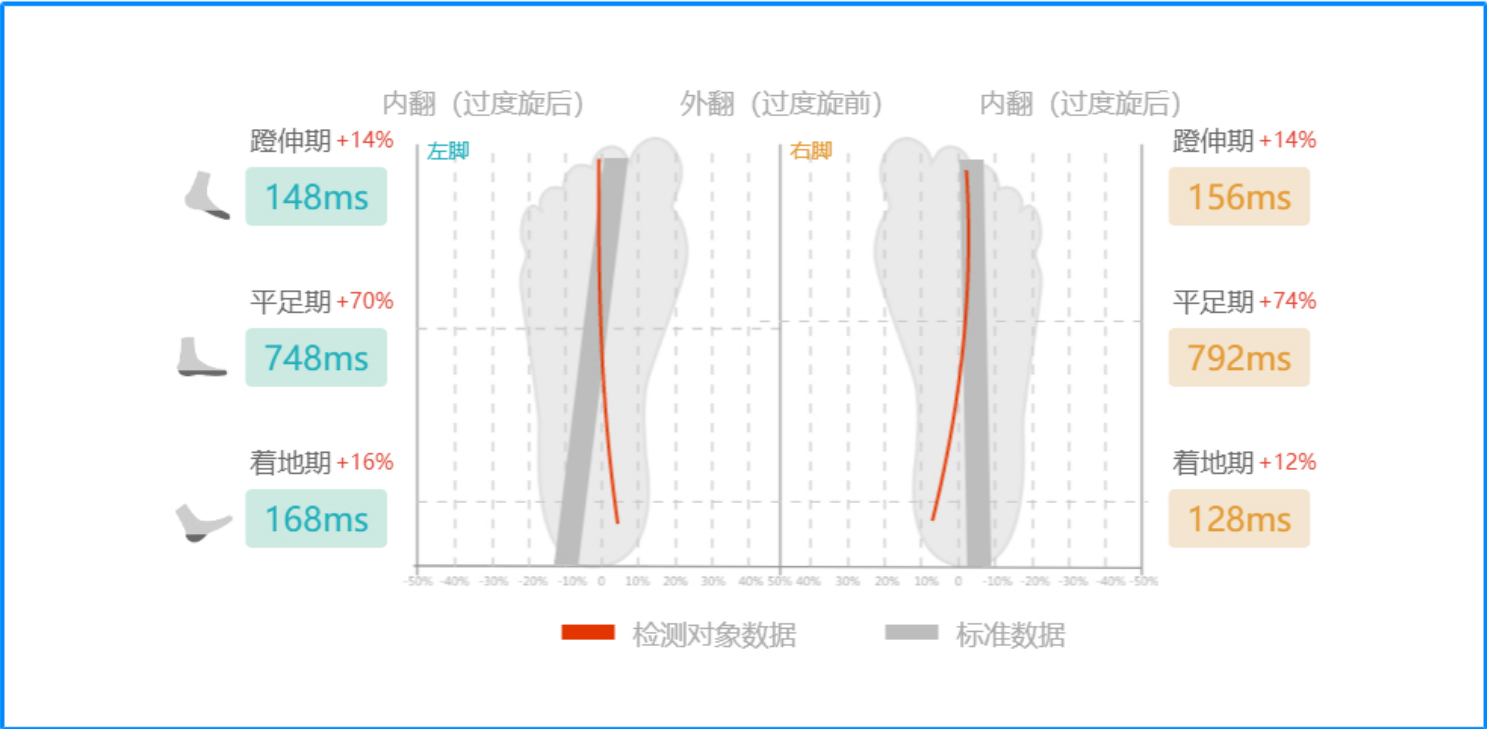

足弓类型

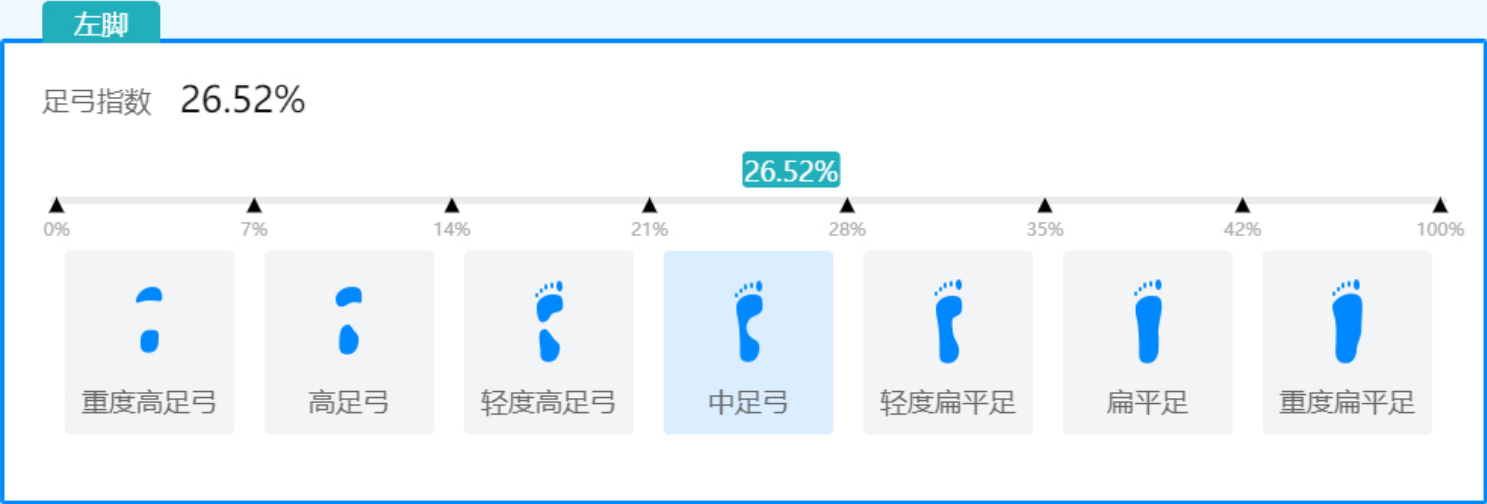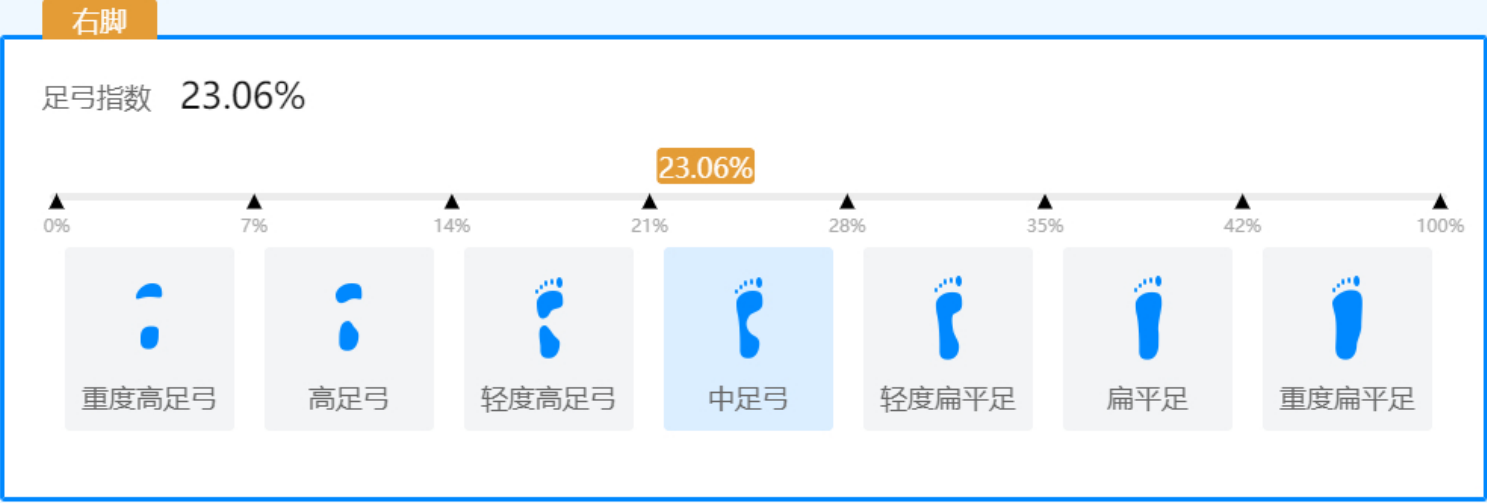

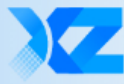

报告结论
