# Supplementary material for: Individualized Corrective Training Based on Precision Biomechanical Assessment for the Prevention of Sports Injuries in Adolescents
Source: Research Square preprint supplement (doi:10.21203/rs.3.rs-8426574/v1), 2026-02-02
Supplement: Supplementary file 155 [file 动态报告-韩雨坪-20250226145119.pdf › Plantar pressure and gait analysis/soccer/动态报告-韩雨坪-20250226145119.pdf]

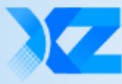

左右脚动态数据

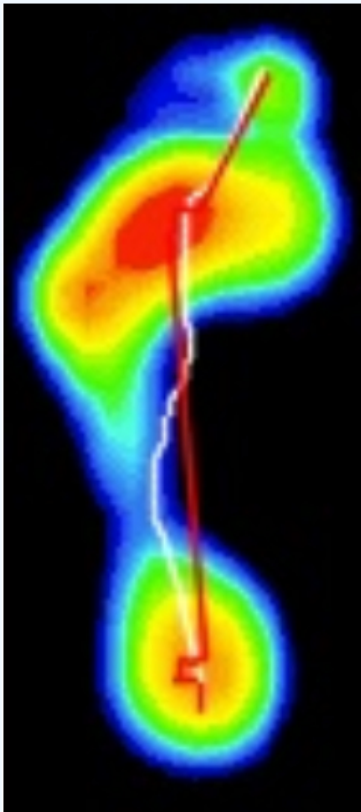

| 第2步      | Cop数据     | 第1步      |
|----------|-----------|----------|
| 194.49   | cop距离【mm】 | 115.90   |
| 3.76     | 步偏脚【°】    | 18.15    |
| 8892.13  | 面积【mm²】   | 9333.07  |
| 22738.36 | 压力【kgf】   | 23809.22 |
| 2.40     | 压强【gr/%】  | 2.35     |
| 34114.77 | 最大压力【kgf】 | 32309.60 |
| 0.18     | 速度【mm/ms】 | 0.19     |

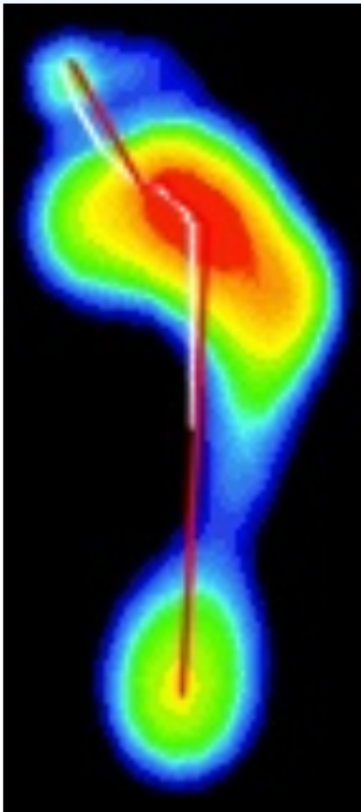

支撑相

左脚

|             |          |
|-------------|----------|
| ● 着地期 8%    |          |
| 时长【ms】      | 86.67    |
| 平均速度【mm/ms】 | 0.11     |
| 最大面积【mm²】   | 3159.00  |
| 最大压力【kgf】   | 7495.56  |
| ● 平足期 83%   |          |
| 时长【ms】      | 870.00   |
| 平均速度【mm/ms】 | 0.16     |
| 最大面积【mm²】   | 12035.63 |
| 最大压力【kgf】   | 31920.46 |
| ● 蹬伸期 9%    |          |
| 时长【ms】      | 96.67    |
| 平均速度【mm/ms】 | 0.32     |
| 最大面积【mm²】   | 4316.63  |
| 最大压力【kgf】   | 8323.02  |

右脚

|             |          |
|-------------|----------|
| ● 着地期 11%   |          |
| 时长【ms】      | 120.00   |
| 平均速度【mm/ms】 | 0.14     |
| 最大面积【mm²】   | 3963.00  |
| 最大压力【kgf】   | 9082.00  |
| ● 平足期 78%   |          |
| 时长【ms】      | 725.00   |
| 平均速度【mm/ms】 | 0.15     |
| 最大面积【mm²】   | 12387.38 |
| 最大压力【kgf】   | 32379.77 |
| ● 蹬伸期 14%   |          |
| 时长【ms】      | 125.00   |
| 平均速度【mm/ms】 | 0.24     |
| 最大面积【mm²】   | 5351.63  |
| 最大压力【kg/f】  | 12364.72 |

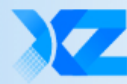

内外翻

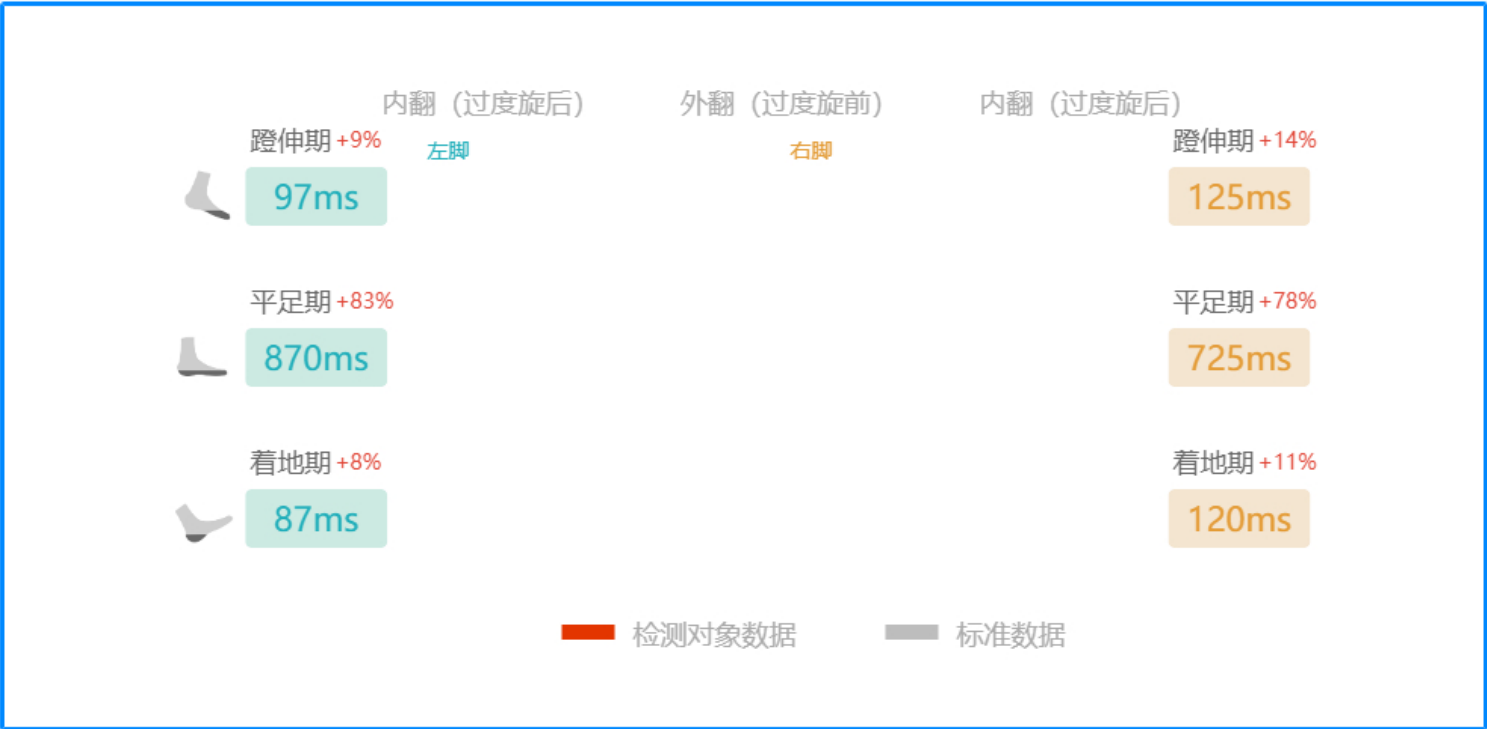

足弓类型

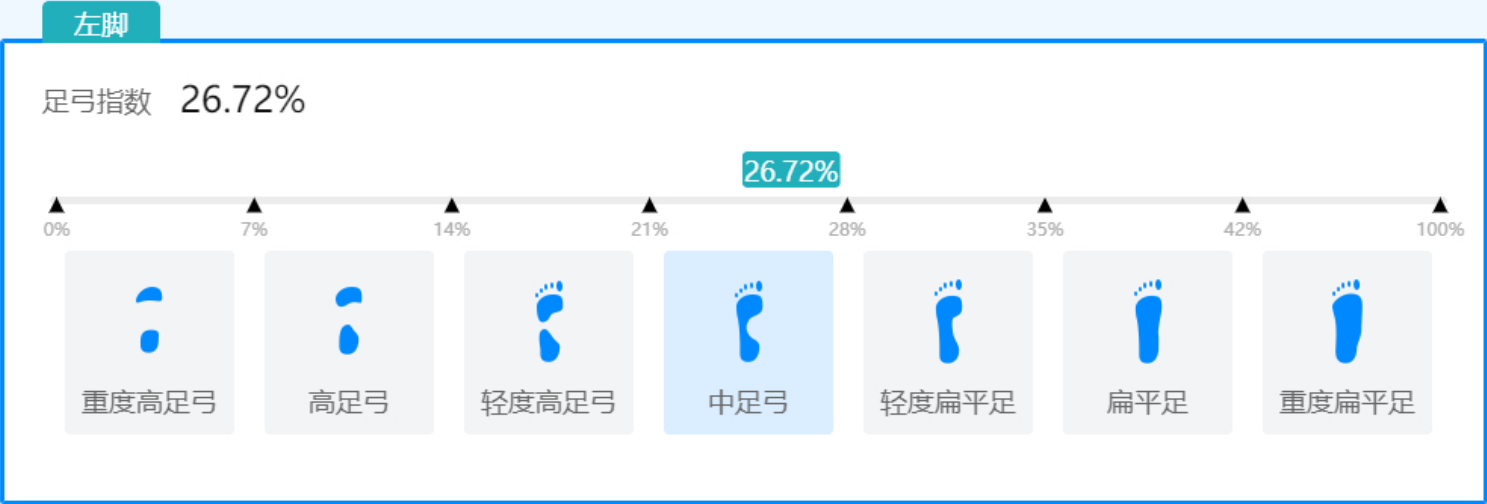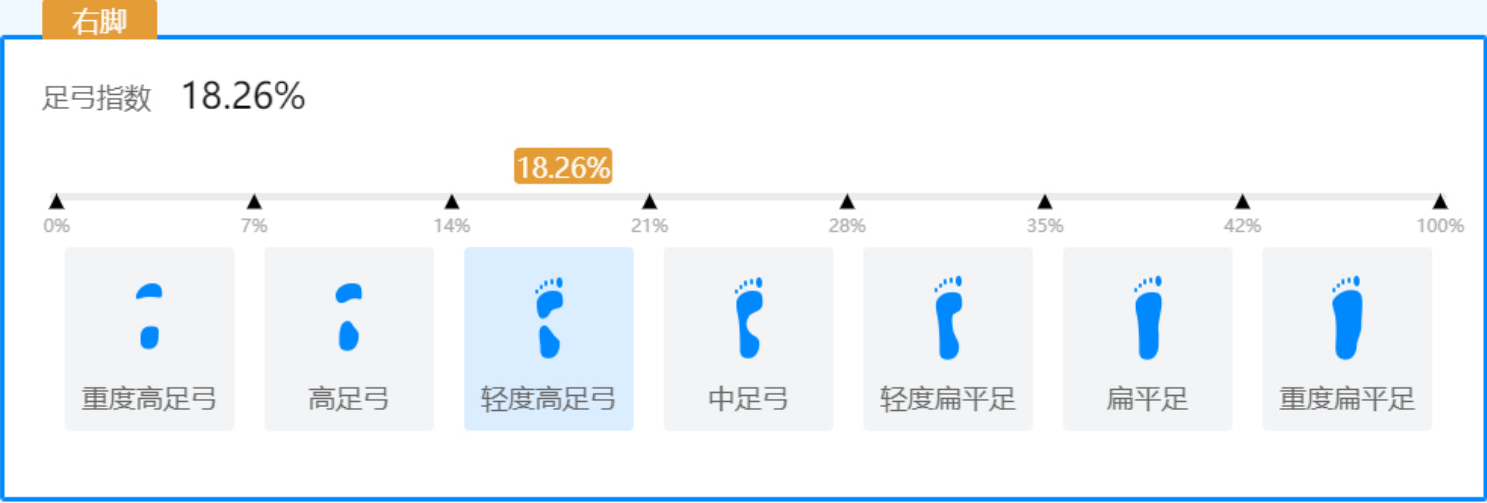

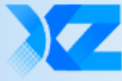

报告结论
