# Supplementary material for: Individualized Corrective Training Based on Precision Biomechanical Assessment for the Prevention of Sports Injuries in Adolescents
Source: Research Square preprint supplement (doi:10.21203/rs.3.rs-8426574/v1), 2026-02-02

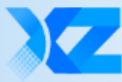

左右脚动态数据

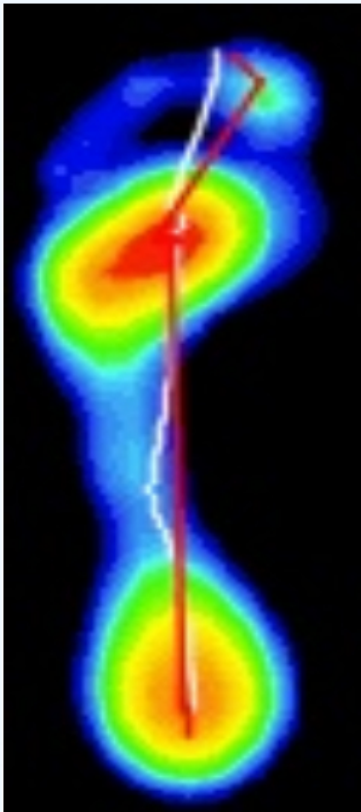

| 第2步      | Cop数据     | 第1步      |
|----------|-----------|----------|
| 212.08   | cop距离【mm】 | 212.39   |
| -3.61    | 步偏脚【°】    | 6.20     |
| 8252.28  | 面积【mm²】   | 7549.55  |
| 19883.70 | 压力【kgf】   | 18225.26 |
| 2.24     | 压强【gr/%】  | 2.21     |
| 30766.13 | 最大压力【kgf】 | 29398.99 |
| 0.20     | 速度【mm/ms】 | 0.22     |

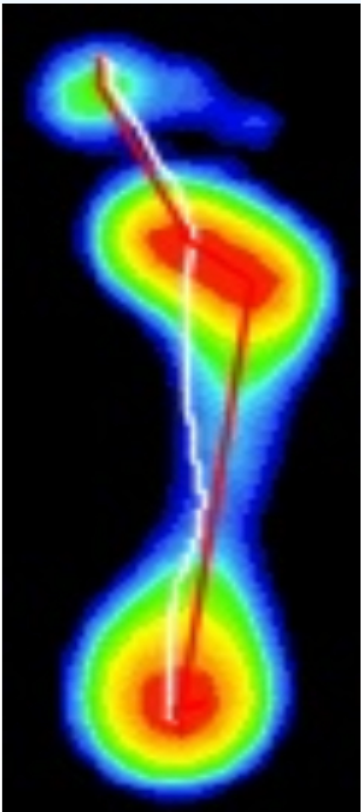

支撑相

左脚

|             |          |
|-------------|----------|
| ● 着地期 7%    |          |
| 时长【ms】      | 80.00    |
| 平均速度【mm/ms】 | 0.13     |
| 最大面积【mm²】   | 3533.06  |
| 最大压力【kgf】   | 8854.92  |
| ● 平足期 72%   |          |
| 时长【ms】      | 770.00   |
| 平均速度【mm/ms】 | 0.18     |
| 最大面积【mm²】   | 12927.94 |
| 最大压力【kgf】   | 31480.58 |
| ● 蹬伸期 20%   |          |
| 时长【ms】      | 215.00   |
| 平均速度【mm/ms】 | 0.26     |
| 最大面积【mm²】   | 6791.63  |
| 最大压力【kgf】   | 17885.32 |

右脚

|             |          |
|-------------|----------|
| ● 着地期 9%    |          |
| 时长【ms】      | 100.00   |
| 平均速度【mm/ms】 | 0.20     |
| 最大面积【mm²】   | 4645.80  |
| 最大压力【kgf】   | 10536.96 |
| ● 平足期 74%   |          |
| 时长【ms】      | 816.00   |
| 平均速度【mm/ms】 | 0.17     |
| 最大面积【mm²】   | 12325.95 |
| 最大压力【kgf】   | 29572.08 |
| ● 蹬伸期 17%   |          |
| 时长【ms】      | 184.00   |
| 平均速度【mm/ms】 | 0.24     |
| 最大面积【mm²】   | 6010.20  |
| 最大压力【kgf】   | 15047.24 |

内外翻

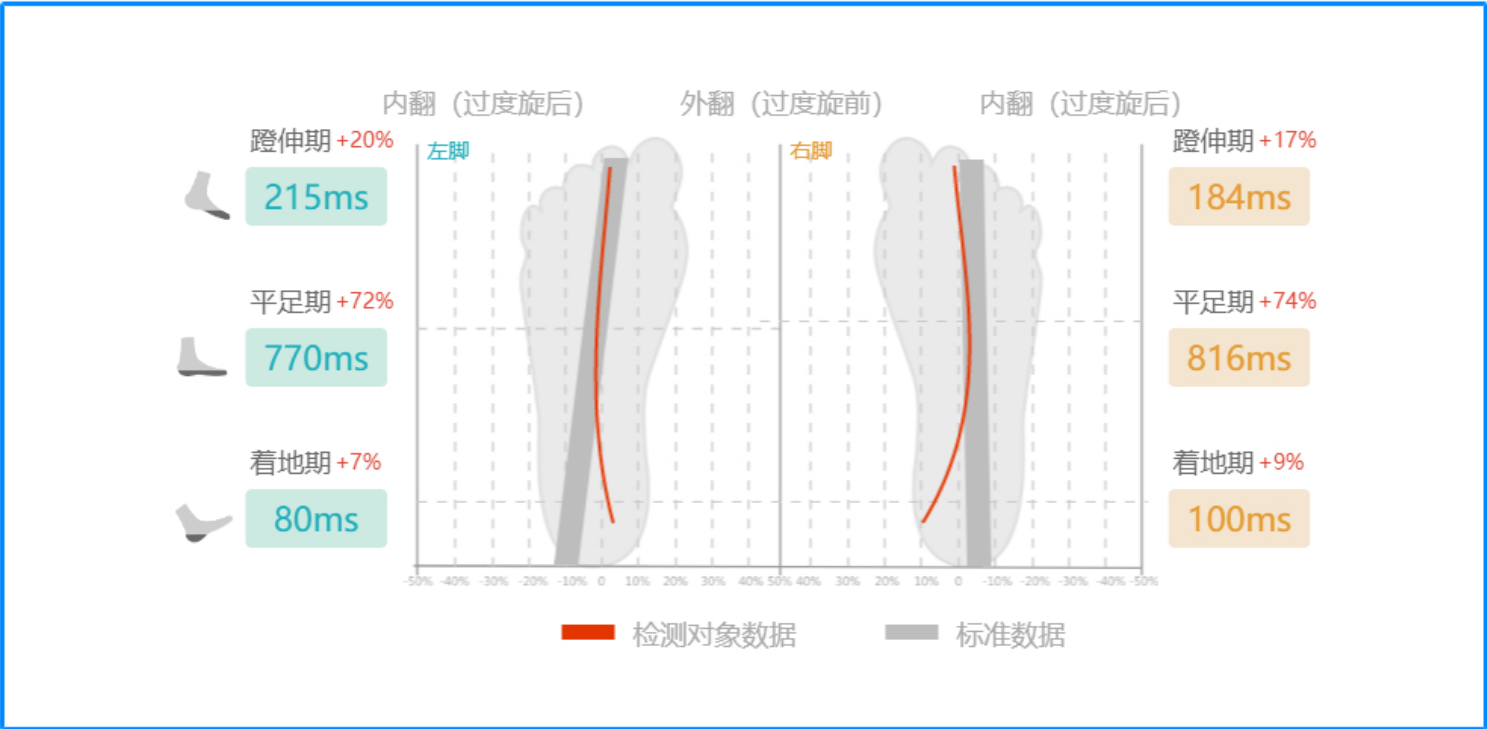

足弓类型

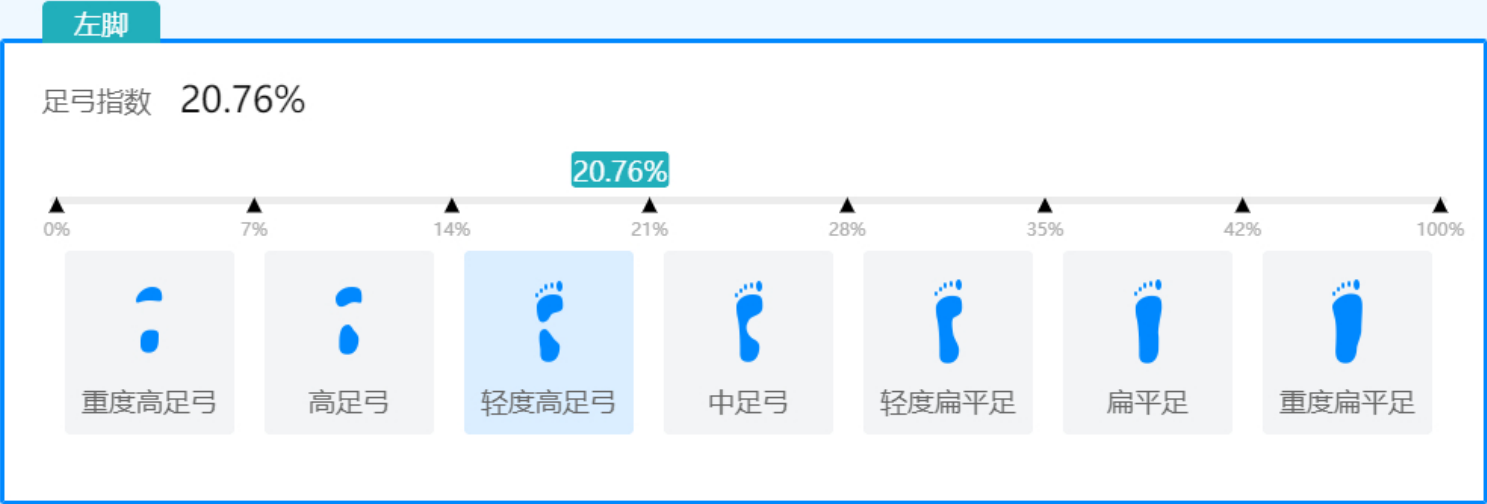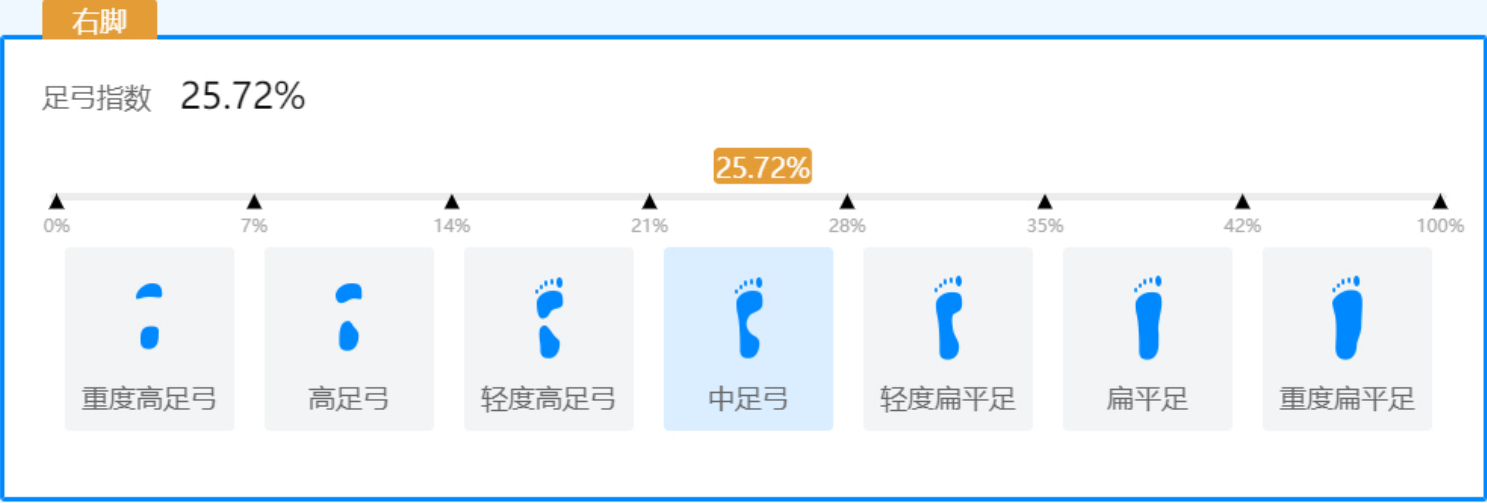

# 动态报告

魏雨虹 21岁 女 53.0kg 168.0cm 2025-2-26 12:31:28

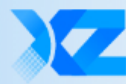

## 报告结论

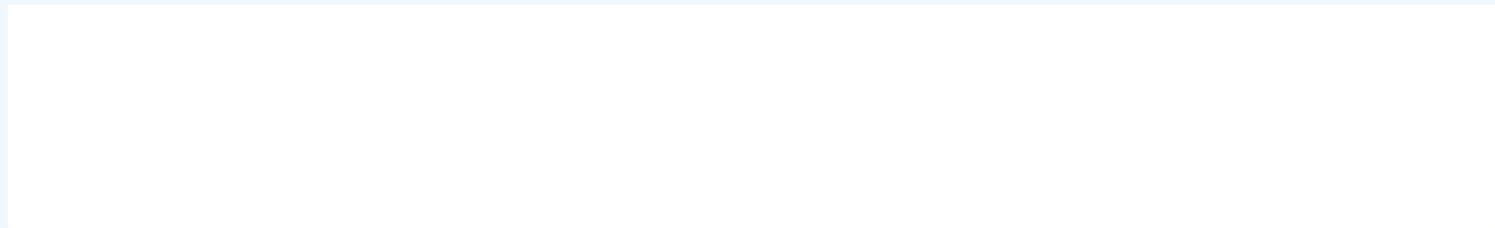

Supplement: Supplementary file 156 [file 动态报告-魏雨虹-20250226123200.pdf › Plantar pressure and gait analysis/soccer/动态报告-魏雨虹-20250226123200.pdf]
