# Supplementary material for: Individualized Corrective Training Based on Precision Biomechanical Assessment for the Prevention of Sports Injuries in Adolescents
Source: Research Square preprint supplement (doi:10.21203/rs.3.rs-8426574/v1), 2026-02-02

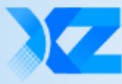

左右脚动态数据

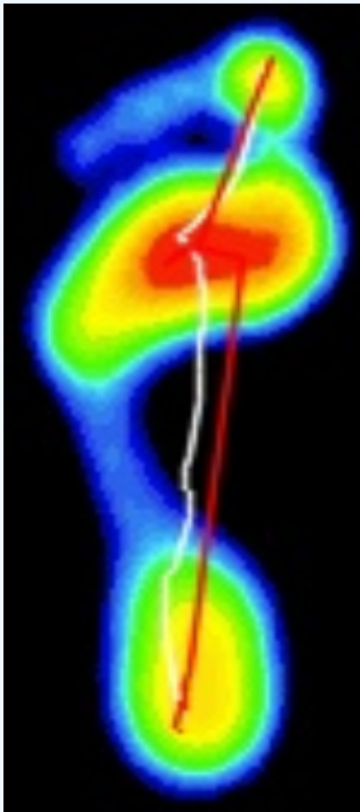

| 第1步      | Cop数据     | 第2步      |
|----------|-----------|----------|
| 225.12   | cop距离【mm】 | 228.97   |
| 14.32    | 步偏脚【°】    | 8.13     |
| 10599.15 | 面积【mm²】   | 11205.20 |
| 23430.64 | 压力【kgf】   | 27644.06 |
| 2.00     | 压强【gr/%】  | 2.30     |
| 40160.62 | 最大压力【kgf】 | 40491.61 |
| 0.27     | 速度【mm/ms】 | 0.25     |

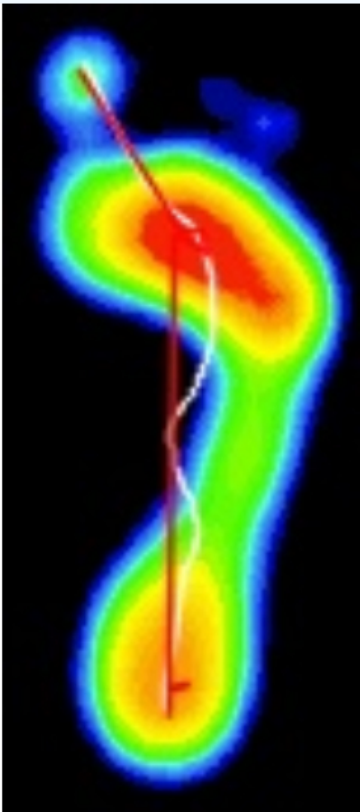

支撑相

左脚

|             |          |
|-------------|----------|
| ● 着地期 6%    |          |
| 时长【ms】      | 46.67    |
| 平均速度【mm/ms】 | 0.15     |
| 最大面积【mm²】   | 3414.00  |
| 最大压力【kgf】   | 5261.80  |
| ● 平足期 83%   |          |
| 时长【ms】      | 700.00   |
| 平均速度【mm/ms】 | 0.19     |
| 最大面积【mm²】   | 15942.38 |
| 最大压力【kgf】   | 41187.40 |
| ● 蹬伸期 13%   |          |
| 时长【ms】      | 124.00   |
| 平均速度【mm/ms】 | 0.42     |
| 最大面积【mm²】   | 7796.70  |
| 最大压力【kgf】   | 17371.85 |

右脚

|             |          |
|-------------|----------|
| ● 着地期 7%    |          |
| 时长【ms】      | 68.00    |
| 平均速度【mm/ms】 | 0.12     |
| 最大面积【mm²】   | 3783.15  |
| 最大压力【kgf】   | 8073.33  |
| ● 平足期 81%   |          |
| 时长【ms】      | 744.00   |
| 平均速度【mm/ms】 | 0.19     |
| 最大面积【mm²】   | 15331.95 |
| 最大压力【kgf】   | 41120.54 |
| ● 蹬伸期 12%   |          |
| 时长【ms】      | 112.00   |
| 平均速度【mm/ms】 | 0.47     |
| 最大面积【mm²】   | 7304.85  |
| 最大压力【kg/f】  | 17773.35 |

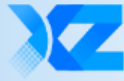

内外翻

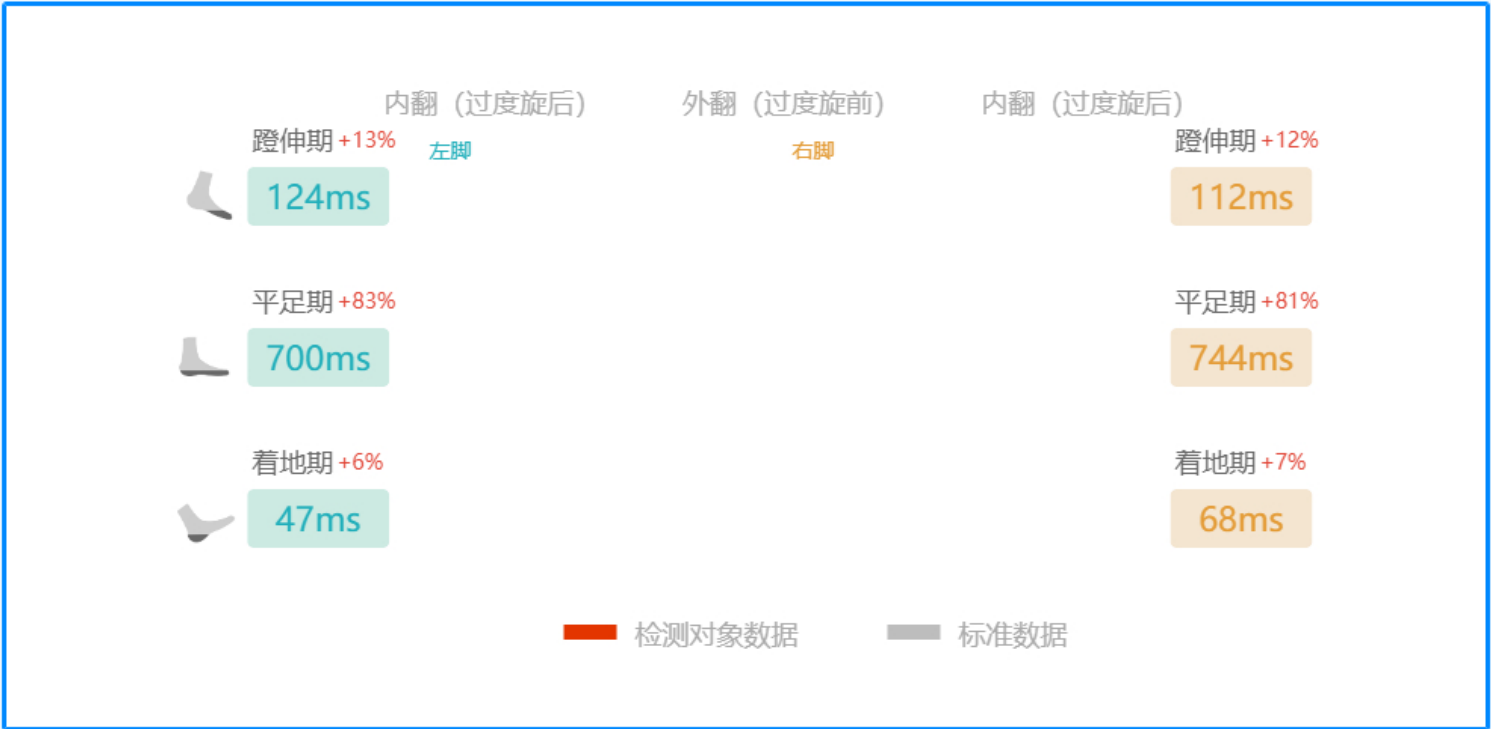

足弓类型

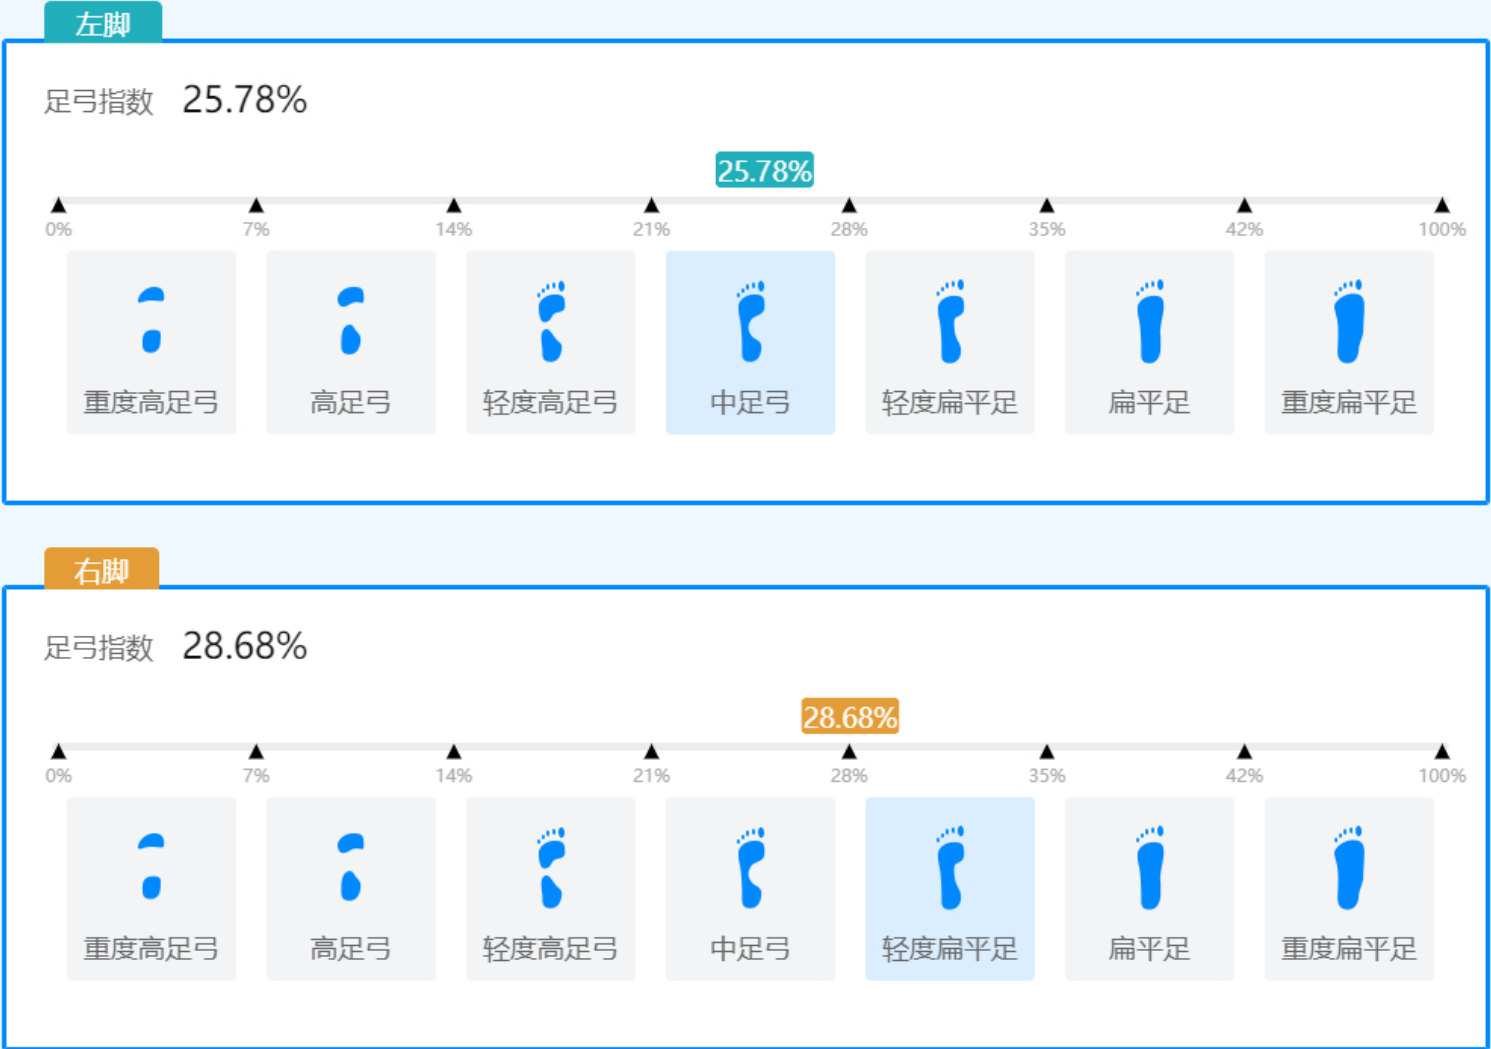

# 动态报告

齐家树 20岁 男 65.0kg 172.0cm 2025-2-26 11:12:21

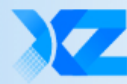

## 报告结论

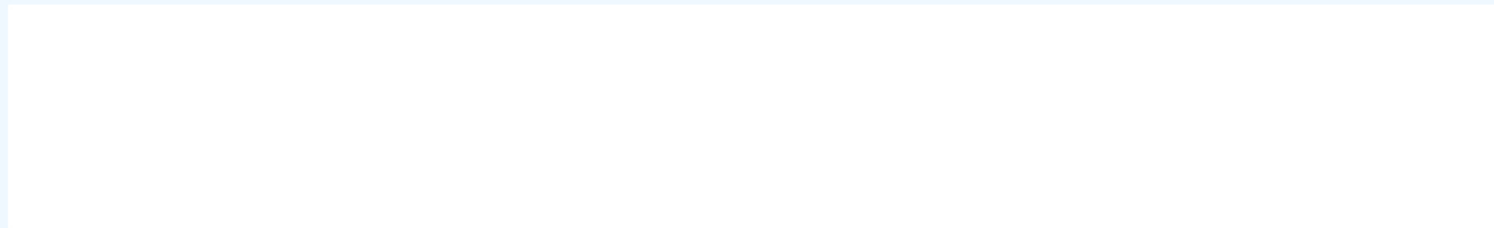

Supplement: Supplementary file 157 [file 动态报告-齐家树-20250226111303.pdf › Plantar pressure and gait analysis/soccer/动态报告-齐家树-20250226111303.pdf]
