# Supplementary material for: Individualized Corrective Training Based on Precision Biomechanical Assessment for the Prevention of Sports Injuries in Adolescents
Source: Research Square preprint supplement (doi:10.21203/rs.3.rs-8426574/v1), 2026-02-02
Supplement: Supplementary file 158 [file 平衡报告-何依雯-20250226135857.pdf › Plantar pressure and gait analysis/soccer/平衡报告-何依雯-20250226135857.pdf]

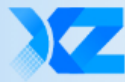

双脚重心变化

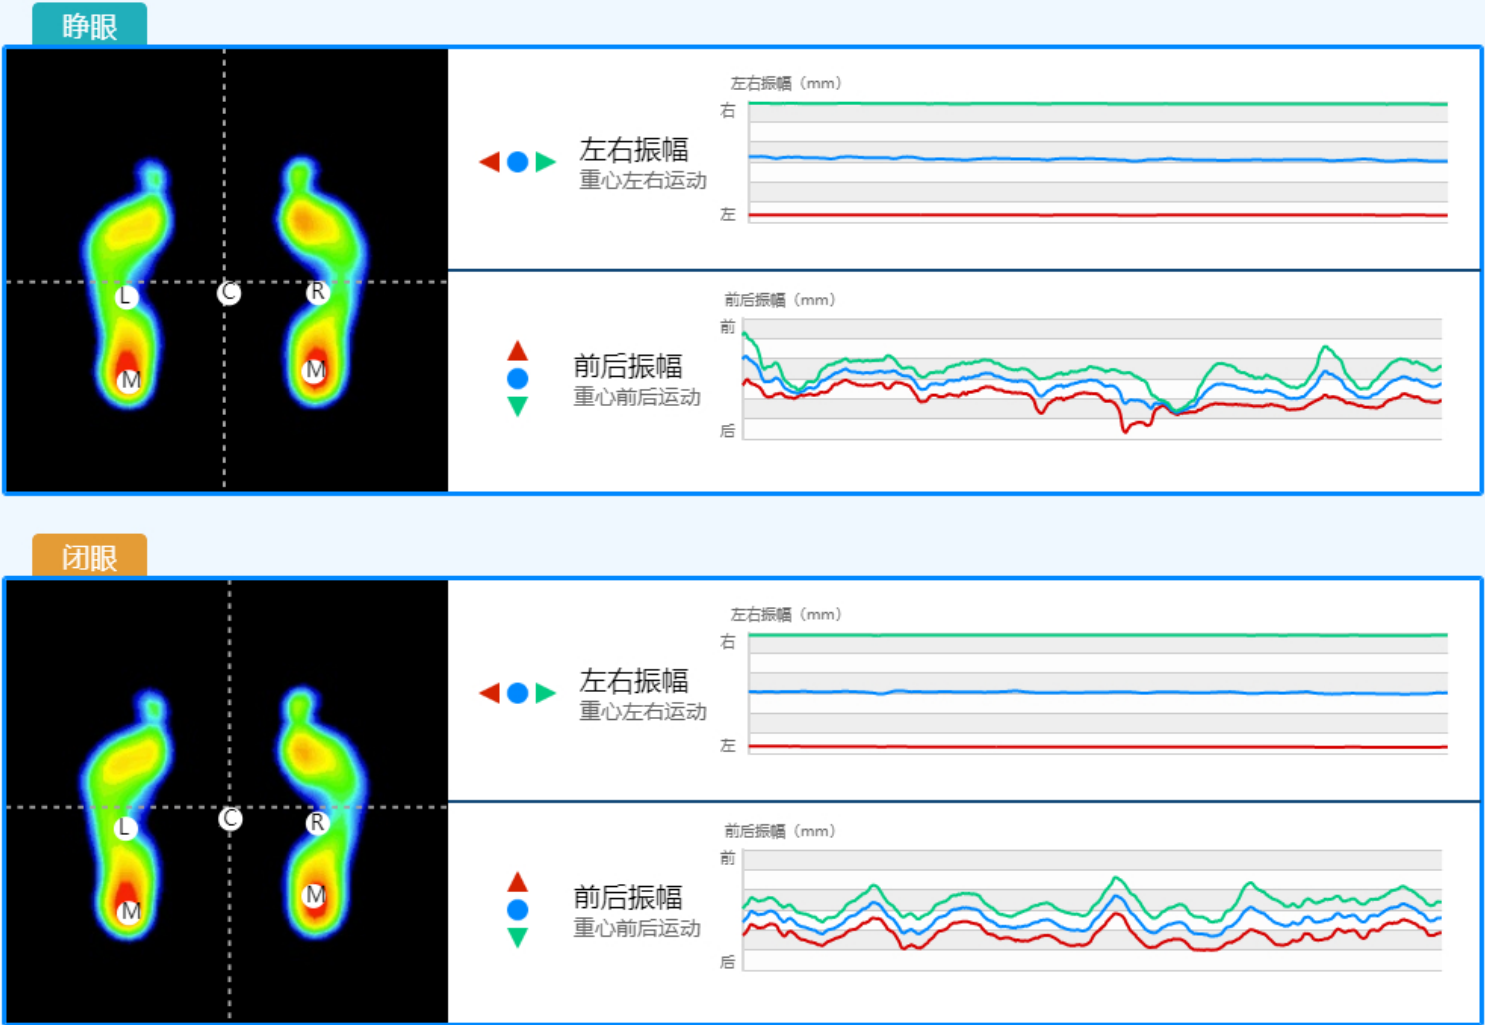

Cop数据

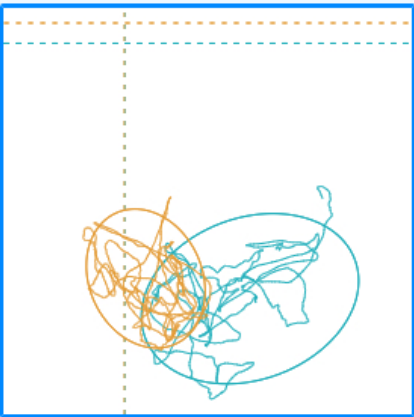

— 睁眼 — 闭眼

|             | 睁眼     | 闭眼     |
|-------------|--------|--------|
| 平均位置X【mm】   | 4.12   | 1.00   |
| 平均位置Y【mm】   | -10.03 | -10.50 |
| 标准差X【mm】    | 1.74   | 1.19   |
| 标准差Y【mm】    | 1.57   | 1.31   |
| 距离【mm】      | 93.72  | 88.67  |
| 平均速度【mm/ms】 | 0.00   | 0.00   |
| 距离/表面积      | 2.11   | 4.46   |
| 偏心率         | 0.69   | 0.62   |
| 倾斜角度【°】     | -20.56 | -24.16 |

# 平衡报告

何依雯 20岁 女 52.0kg 158.0cm 2025-2-26 13:57:52

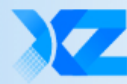

## 报告结论

睁眼  
左右晃动比前后晃动更明显  
闭眼  
前后晃动比左右晃动更明显
