# Supplementary material for: Individualized Corrective Training Based on Precision Biomechanical Assessment for the Prevention of Sports Injuries in Adolescents
Source: Research Square preprint supplement (doi:10.21203/rs.3.rs-8426574/v1), 2026-02-02
Supplement: Supplementary file 161 [file 平衡报告-何长强-20250226151803.pdf › Plantar pressure and gait analysis/soccer/平衡报告-何长强-20250226151803.pdf]

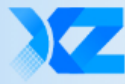

双脚重心变化

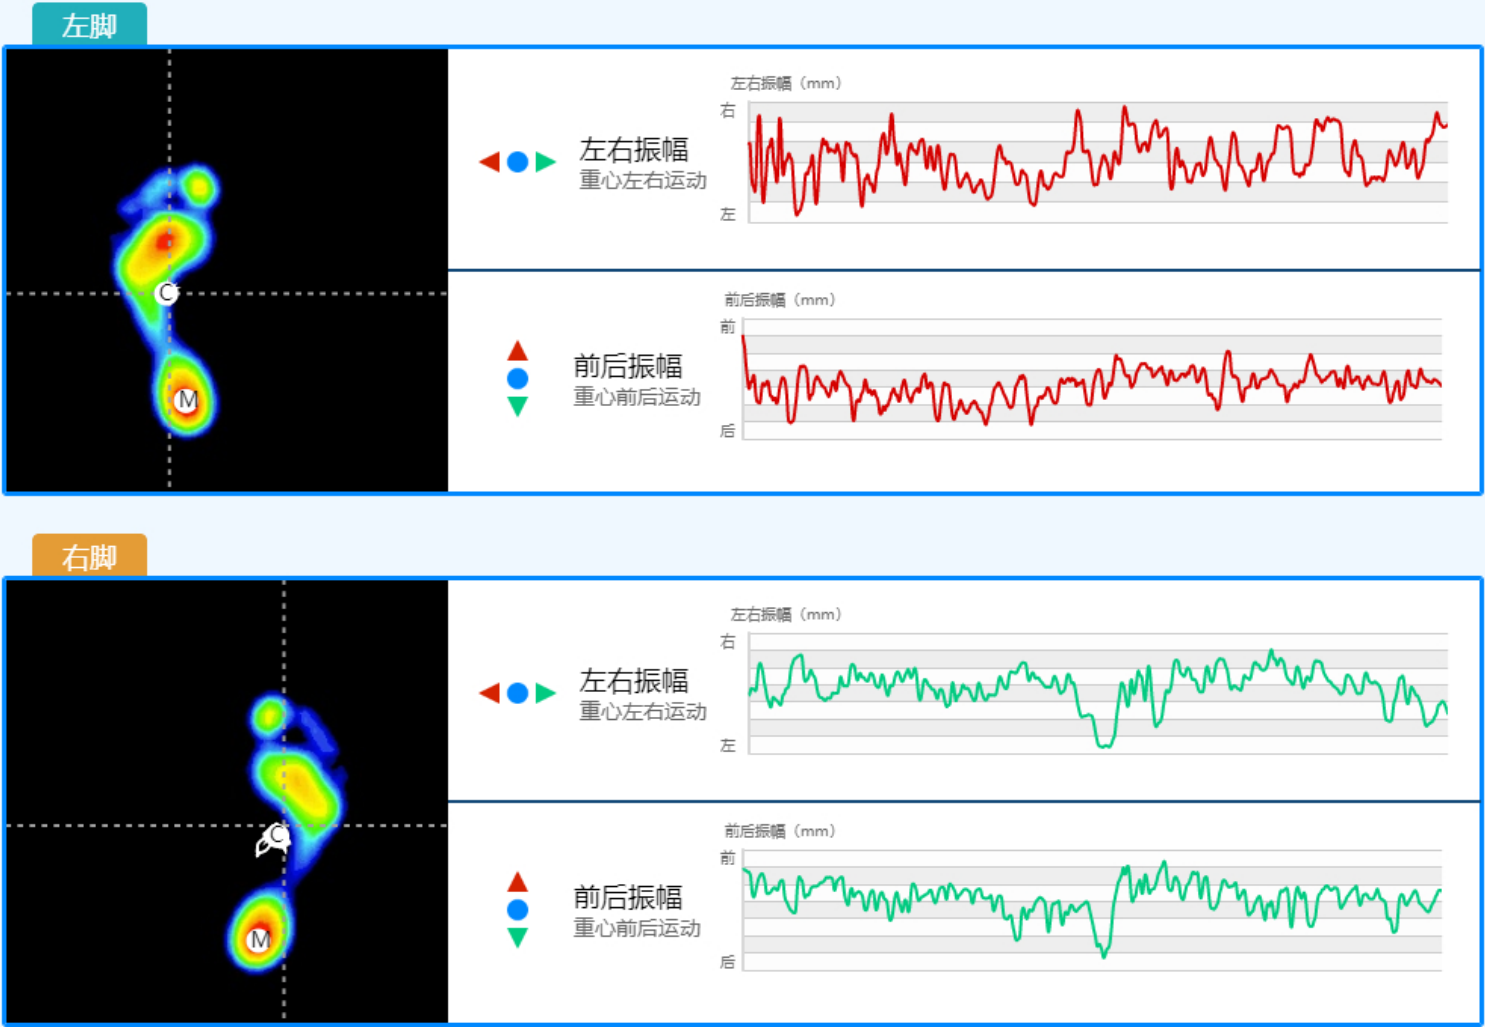

Cop数据

左脚

右脚

|             | 左脚     | 右脚     |
|-------------|--------|--------|
| 平均位置X【mm】   | -2.71  | -5.73  |
| 平均位置Y【mm】   | 0.15   | -9.08  |
| 标准差X【mm】    | 3.25   | 5.23   |
| 标准差Y【mm】    | 2.47   | 4.50   |
| 距离【mm】      | 643.93 | 843.33 |
| 平均速度【mm/ms】 | 0.02   | 0.03   |
| 距离/表面积      | 3.36   | 1.49   |
| 偏心率         | 0.46   | 0.59   |
| 倾斜角度【°】     | -82.77 | -11.68 |

# 平衡报告

何长强 20岁 男 58.0kg 177.0cm 2025-2-26 15:16:54

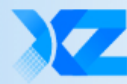

## 报告结论

睁眼  
左右振幅大于参考值  
左右晃动比前后晃动更明显
