# Supplementary material for: Individualized Corrective Training Based on Precision Biomechanical Assessment for the Prevention of Sports Injuries in Adolescents
Source: Research Square preprint supplement (doi:10.21203/rs.3.rs-8426574/v1), 2026-02-02
Supplement: Supplementary file 163 [file 平衡报告-席耘赫-20250226110550.pdf › Plantar pressure and gait analysis/soccer/平衡报告-席耘赫-20250226110550.pdf]

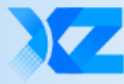

双脚重心变化

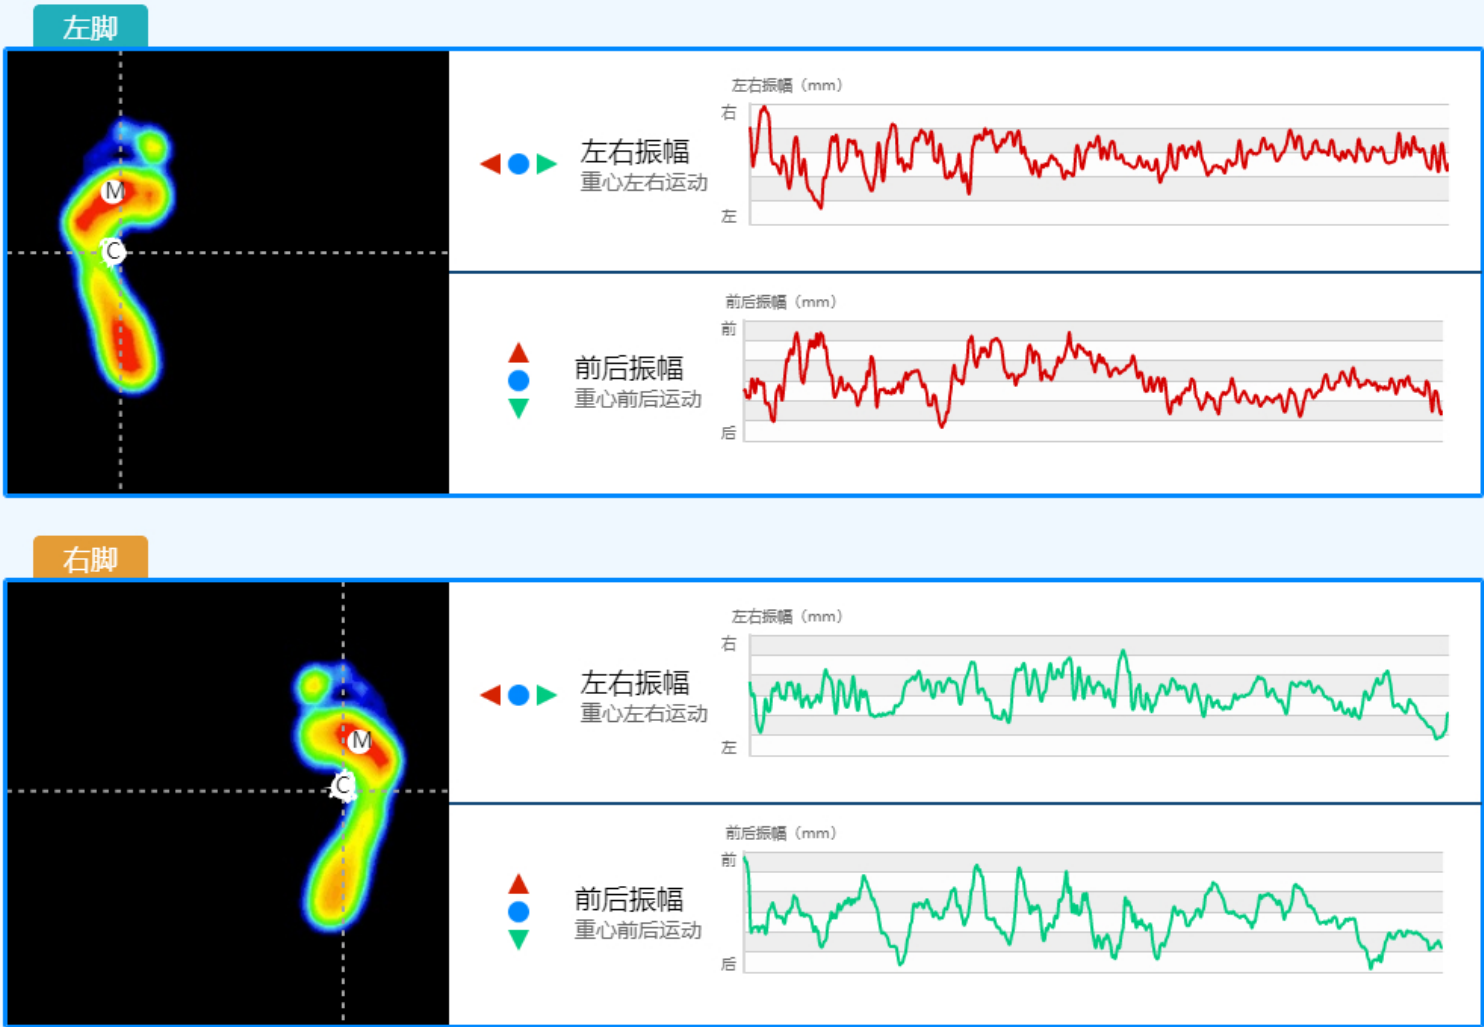

Cop数据

左脚 右脚

|             | 左脚     | 右脚     |
|-------------|--------|--------|
| 平均位置X【mm】   | -5.84  | 0.11   |
| 平均位置Y【mm】   | -0.12  | 3.49   |
| 标准差X【mm】    | 3.18   | 3.94   |
| 标准差Y【mm】    | 4.76   | 5.10   |
| 距离【mm】      | 827.95 | 816.73 |
| 平均速度【mm/ms】 | 0.03   | 0.03   |
| 距离/表面积      | 2.59   | 1.85   |
| 偏心率         | 0.64   | 0.59   |
| 倾斜角度【°】     | -17.61 | -72.26 |

# 平衡报告

席耘赫 20岁 男 50.0kg 175.0cm 2025-2-26 11:04:43

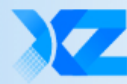

## 报告结论

睁眼  
前后振幅大于参考值  
前后晃动比左右晃动更明显
