# Supplementary material for: Individualized Corrective Training Based on Precision Biomechanical Assessment for the Prevention of Sports Injuries in Adolescents
Source: Research Square preprint supplement (doi:10.21203/rs.3.rs-8426574/v1), 2026-02-02
Supplement: Supplementary file 164 [file 平衡报告-张佳涵-20250226122027.pdf › Plantar pressure and gait analysis/soccer/平衡报告-张佳涵-20250226122027.pdf]

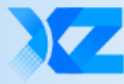

双脚重心变化

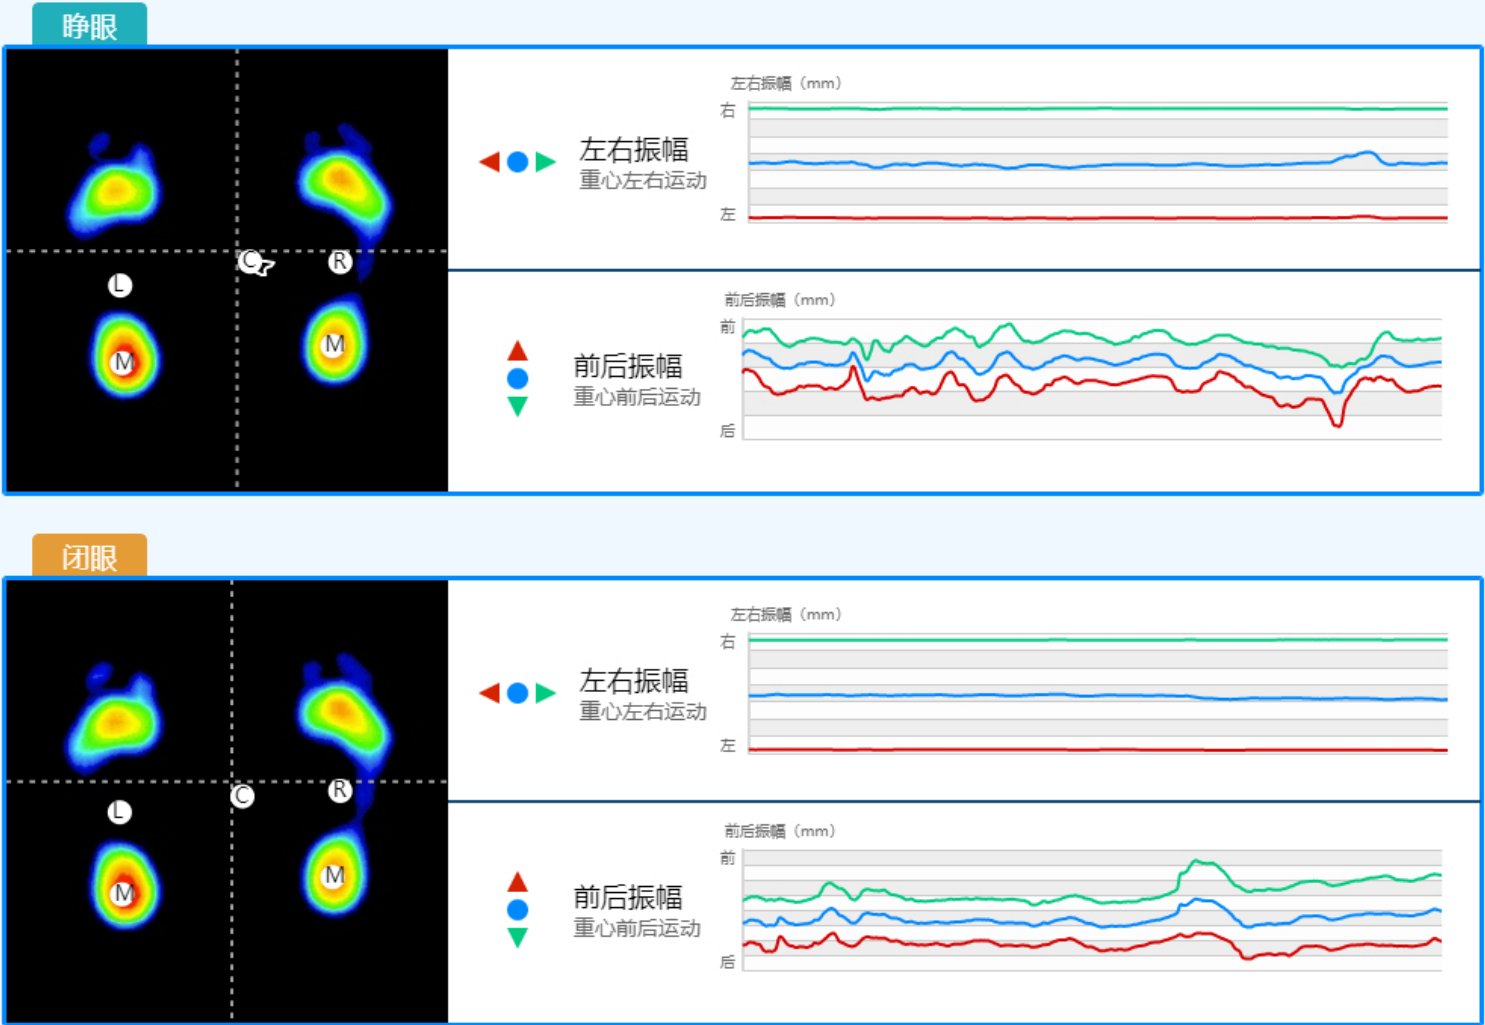

Cop数据

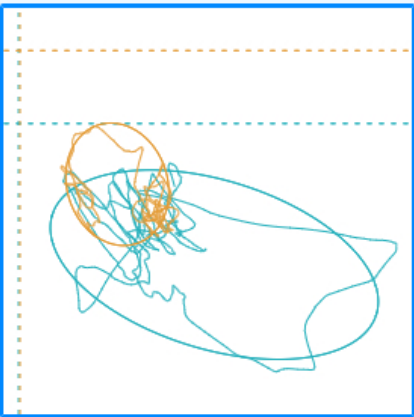

— 睁眼 — 闭眼

|             | 睁眼     | 闭眼     |
|-------------|--------|--------|
| 平均位置X【mm】   | 11.42  | 9.14   |
| 平均位置Y【mm】   | -9.33  | -12.96 |
| 标准差X【mm】    | 4.71   | 2.97   |
| 标准差Y【mm】    | 3.35   | 2.02   |
| 距离【mm】      | 222.82 | 103.00 |
| 平均速度【mm/ms】 | 0.01   | 0.00   |
| 距离/表面积      | 0.70   | 1.47   |
| 偏心率         | 0.87   | 0.60   |
| 倾斜角度【°】     | -72.84 | -17.56 |

平衡报告

张佳涵 17岁 女 56.0kg 162.0cm 2025-2-26 12:19:17



报告结论

睁眼  
左右晃动比前后晃动更明显  
闭眼  
左右晃动比前后晃动更明显
