# Supplementary material for: Individualized Corrective Training Based on Precision Biomechanical Assessment for the Prevention of Sports Injuries in Adolescents
Source: Research Square preprint supplement (doi:10.21203/rs.3.rs-8426574/v1), 2026-02-02
Supplement: Supplementary file 166 [file 平衡报告-张凌志-20250226103606.pdf › Plantar pressure and gait analysis/soccer/平衡报告-张凌志-20250226103606.pdf]

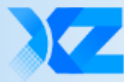

双脚重心变化

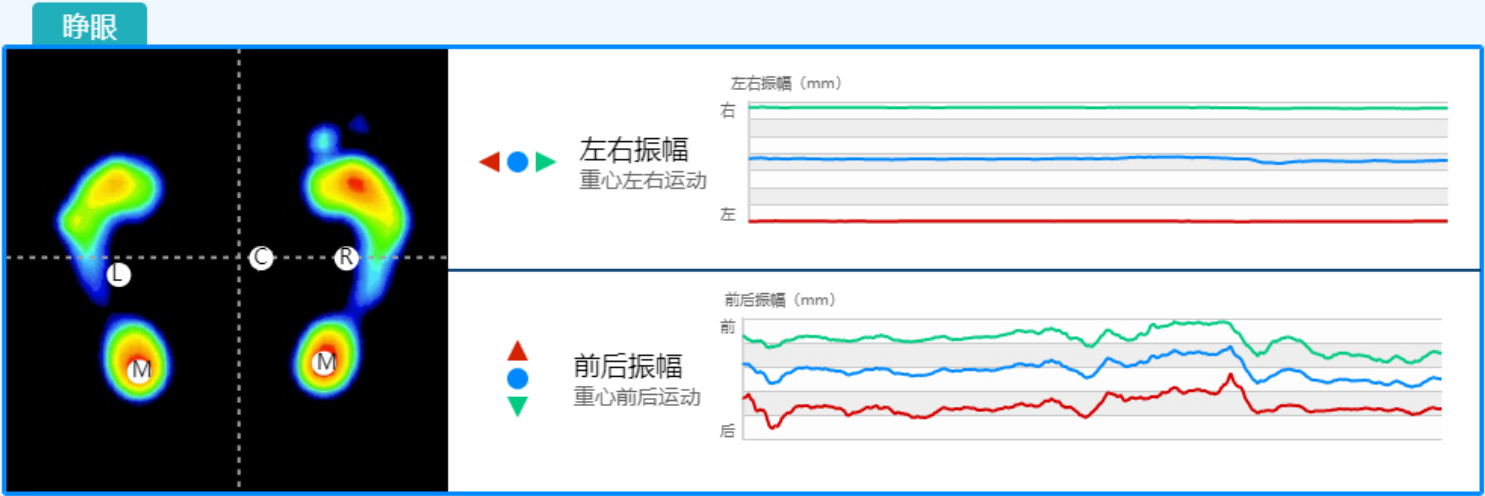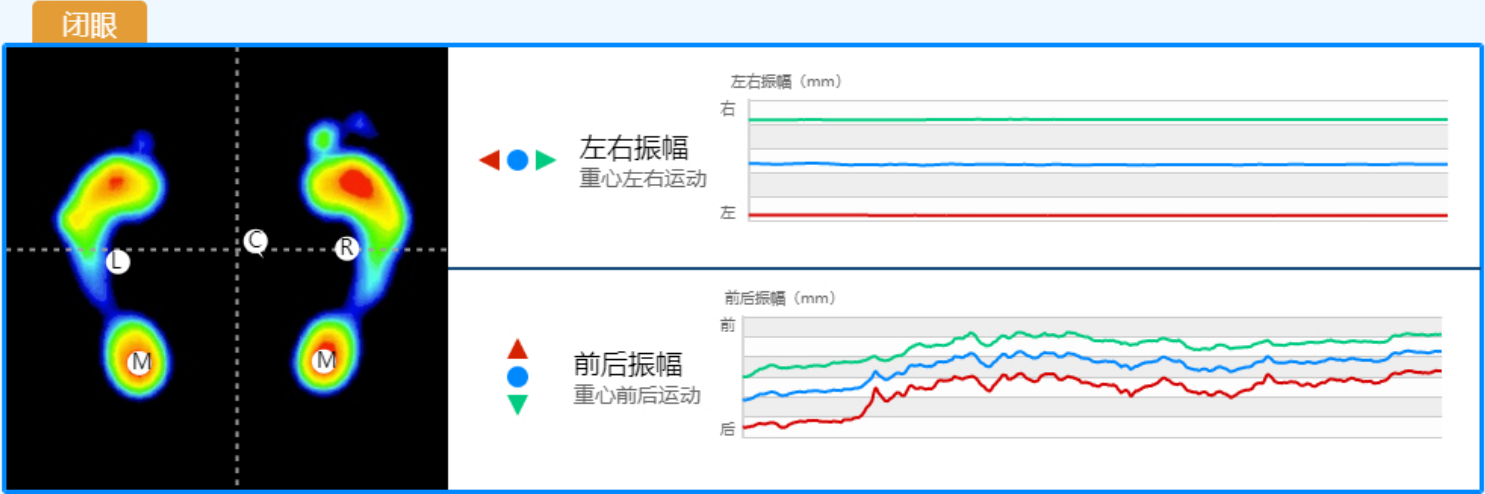

Cop数据

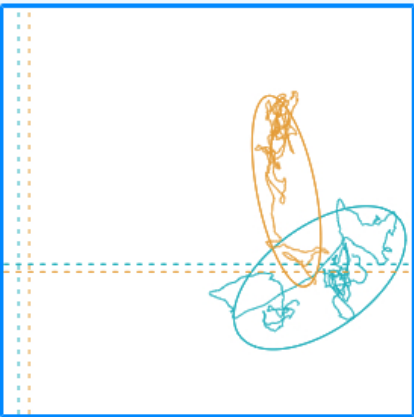

睁眼 闭眼

|             | 睁眼     | 闭眼     |
|-------------|--------|--------|
| 平均位置X【mm】   | 19.44  | 15.99  |
| 平均位置Y【mm】   | -0.75  | 7.45   |
| 标准差X【mm】    | 2.52   | 0.83   |
| 标准差Y【mm】    | 1.87   | 3.27   |
| 距离【mm】      | 93.82  | 89.40  |
| 平均速度【mm/ms】 | 0.00   | 0.00   |
| 距离/表面积      | 1.44   | 2.49   |
| 偏心率         | 0.85   | 0.95   |
| 倾斜角度【°】     | -35.92 | -11.05 |

平衡报告

张凌志 21岁 男 82.0kg 176.0cm 2025-2-26 10:35:01

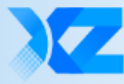

报告结论

睁眼  
左右晃动比前后晃动更明显  
闭眼  
前后晃动比左右晃动更明显
