# Supplementary material for: Individualized Corrective Training Based on Precision Biomechanical Assessment for the Prevention of Sports Injuries in Adolescents
Source: Research Square preprint supplement (doi:10.21203/rs.3.rs-8426574/v1), 2026-02-02
Supplement: Supplementary file 167 [file 平衡报告-张凌志-20250226103727.pdf › Plantar pressure and gait analysis/soccer/平衡报告-张凌志-20250226103727.pdf]

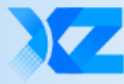

双脚重心变化

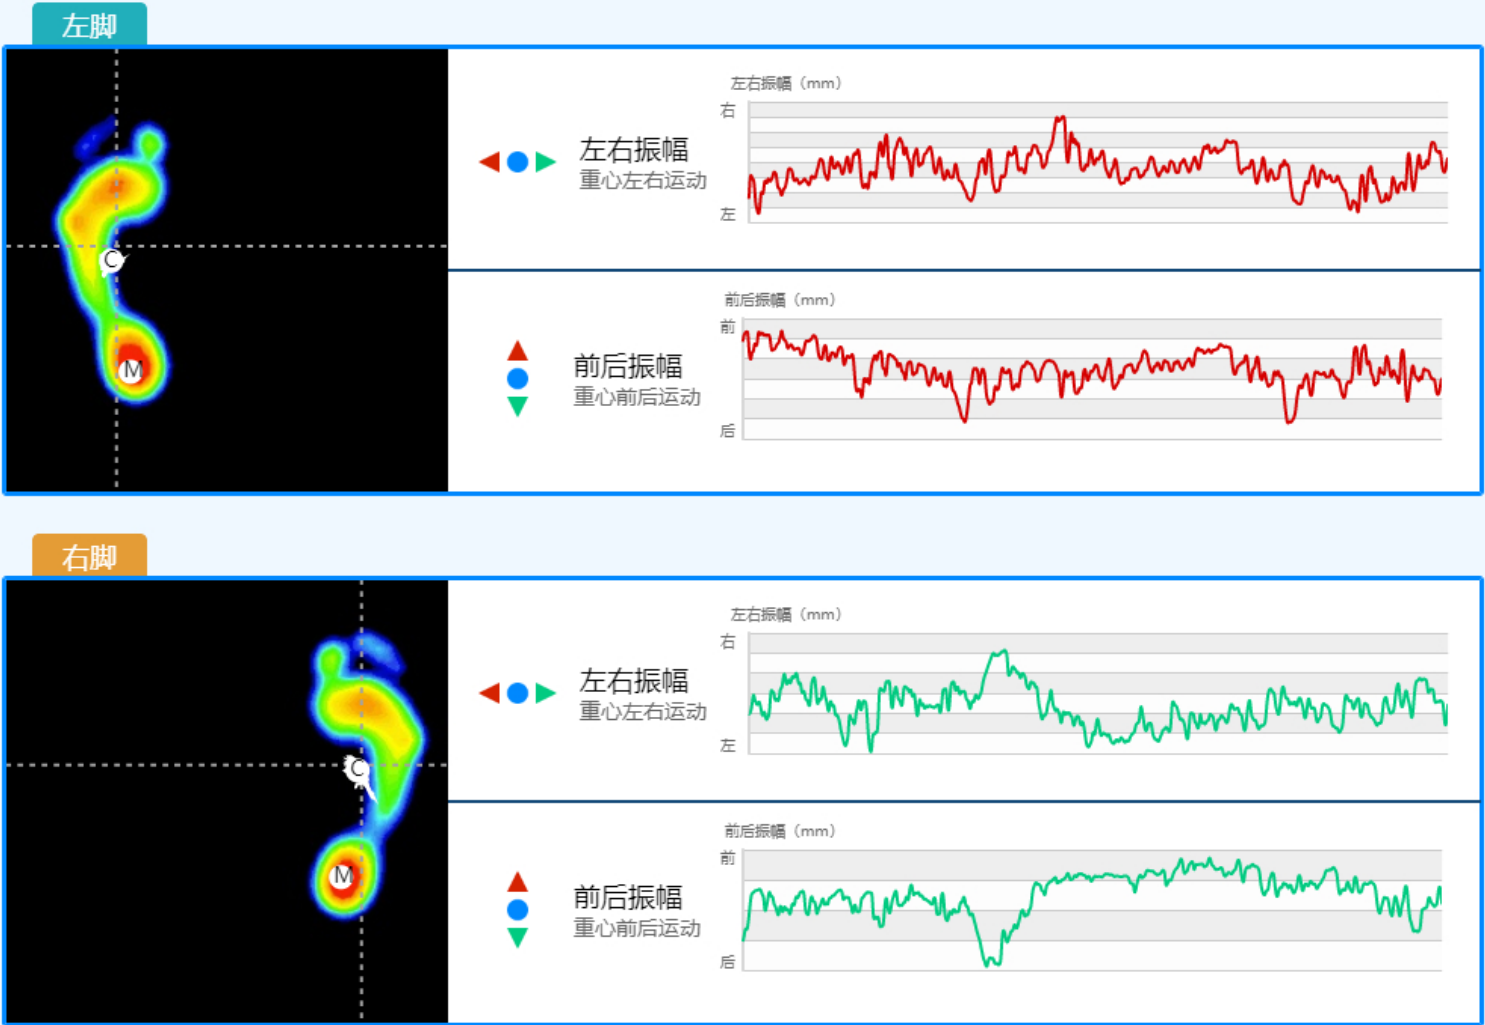

Cop数据

左脚 右脚

|             | 左脚     | 右脚     |
|-------------|--------|--------|
| 平均位置X【mm】   | -4.47  | -3.42  |
| 平均位置Y【mm】   | -12.68 | -4.77  |
| 标准差X【mm】    | 3.36   | 4.86   |
| 标准差Y【mm】    | 4.27   | 7.05   |
| 距离【mm】      | 733.89 | 821.80 |
| 平均速度【mm/ms】 | 0.02   | 0.03   |
| 距离/表面积      | 2.60   | 1.85   |
| 偏心率         | 0.72   | 0.94   |
| 倾斜角度【°】     | -37.69 | -31.23 |

# 平衡报告

张凌志 21岁 男 82.0kg 176.0cm 2025-2-26 10:36:20

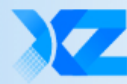

## 报告结论

睁眼  
前后振幅大于参考值  
前后晃动比左右晃动更明显
