# Supplementary material for: Individualized Corrective Training Based on Precision Biomechanical Assessment for the Prevention of Sports Injuries in Adolescents
Source: Research Square preprint supplement (doi:10.21203/rs.3.rs-8426574/v1), 2026-02-02
Supplement: Supplementary file 168 [file 平衡报告-张可云-20250226143224.pdf › Plantar pressure and gait analysis/soccer/平衡报告-张可云-20250226143224.pdf]

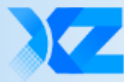

双脚重心变化

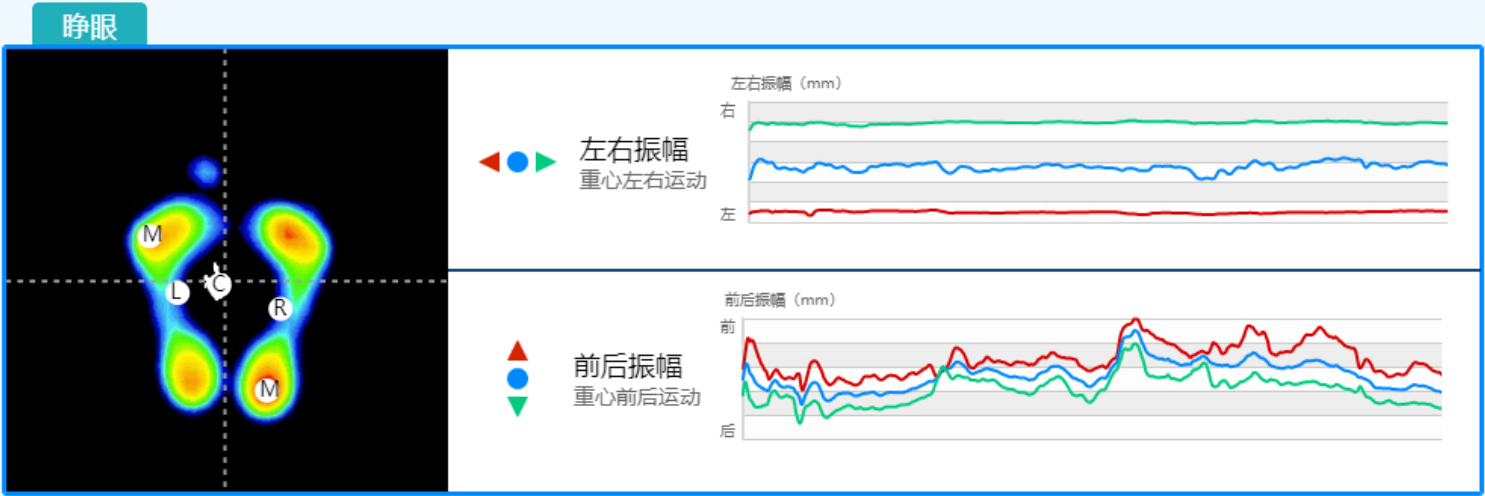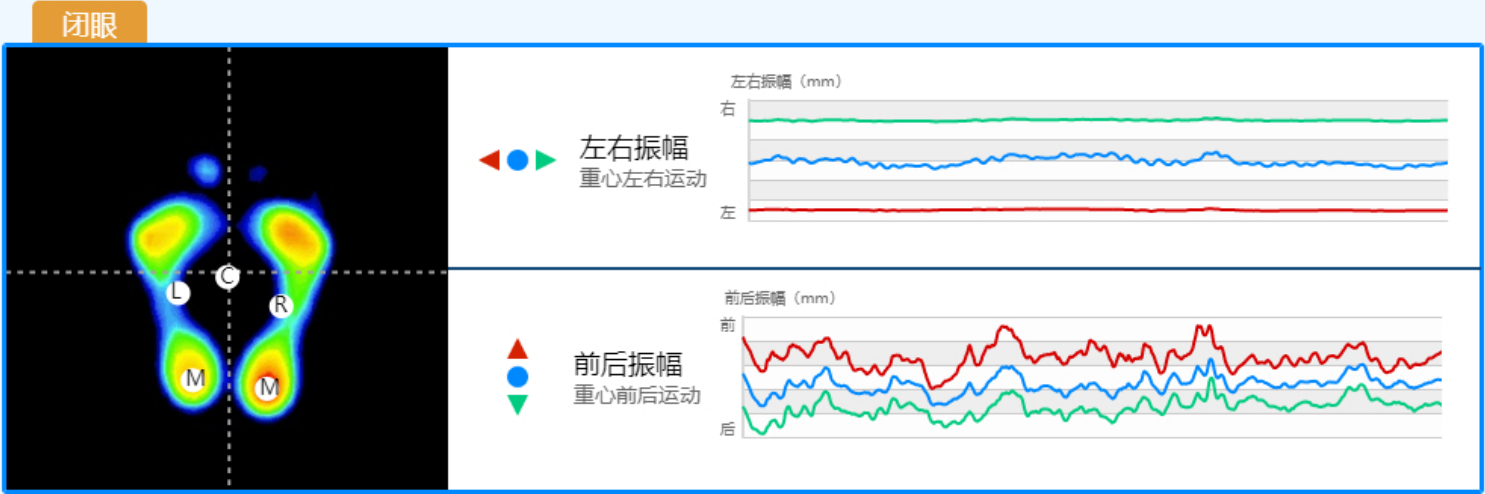

Cop数据

|             | 睁眼     | 闭眼     |
|-------------|--------|--------|
| 平均位置X【mm】   | -4.82  | -1.45  |
| 平均位置Y【mm】   | -3.45  | -4.16  |
| 标准差X【mm】    | 3.98   | 3.99   |
| 标准差Y【mm】    | 5.92   | 1.81   |
| 距离【mm】      | 338.87 | 305.97 |
| 平均速度【mm/ms】 | 0.01   | 0.01   |
| 距离/表面积      | 0.88   | 2.54   |
| 偏心率         | 0.57   | 0.85   |
| 倾斜角度【°】     | -43.61 | -5.18  |

# 平衡报告

张可云 22岁 女 52.0kg 166.0cm 2025-2-26 14:31:16

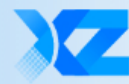

## 报告结论

睁眼  
前后振幅大于参考值  
前后晃动比左右晃动更明显  
闭眼  
左右晃动比前后晃动更明显
