# Supplementary material for: Individualized Corrective Training Based on Precision Biomechanical Assessment for the Prevention of Sports Injuries in Adolescents
Source: Research Square preprint supplement (doi:10.21203/rs.3.rs-8426574/v1), 2026-02-02
Supplement: Supplementary file 169 [file 平衡报告-张可云-20250226143341.pdf › Plantar pressure and gait analysis/soccer/平衡报告-张可云-20250226143341.pdf]

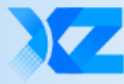

双脚重心变化

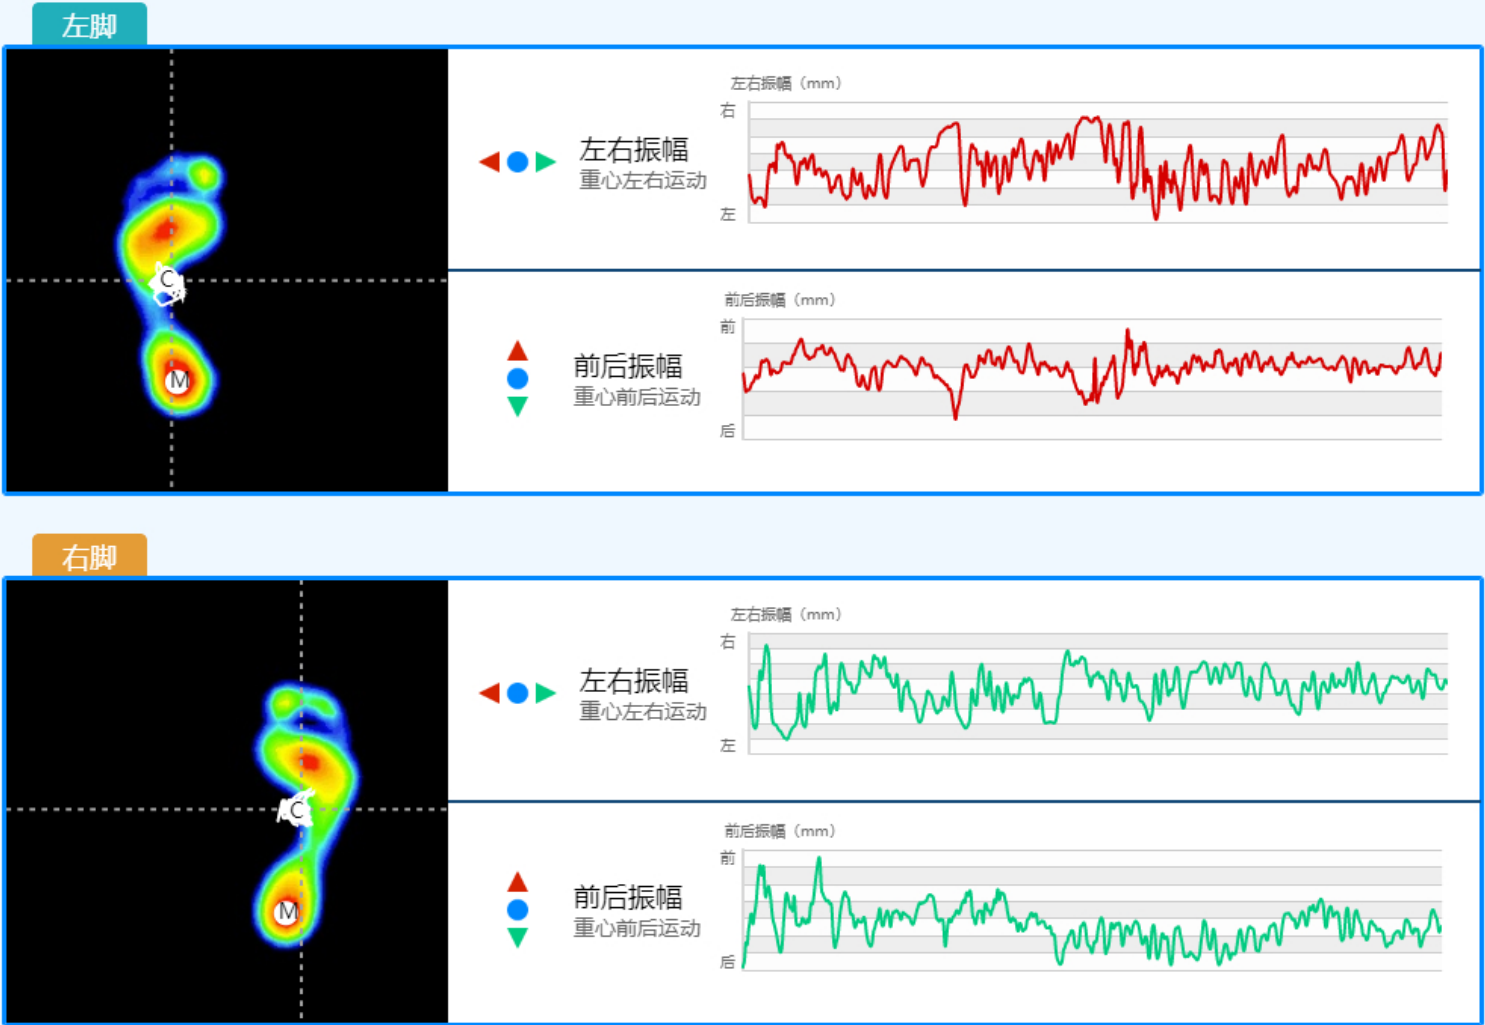

Cop数据

左脚 右脚

|             | 左脚      | 右脚      |
|-------------|---------|---------|
| 平均位置X【mm】   | -3.69   | -3.49   |
| 平均位置Y【mm】   | -0.26   | -1.86   |
| 标准差X【mm】    | 6.29    | 6.15    |
| 标准差Y【mm】    | 5.07    | 5.33    |
| 距离【mm】      | 1396.65 | 1289.62 |
| 平均速度【mm/ms】 | 0.05    | 0.04    |
| 距离/表面积      | 1.69    | 1.69    |
| 偏心率         | 0.62    | 0.44    |
| 倾斜角度【°】     | -19.29  | -86.24  |

# 平衡报告

张可云 22岁 女 52.0kg 166.0cm 2025-2-26 14:32:35

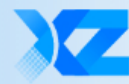

## 报告结论

睁眼  
左右振幅大于参考值  
前后振幅大于参考值  
左右晃动比前后晃动更明显
