# Supplementary material for: Individualized Corrective Training Based on Precision Biomechanical Assessment for the Prevention of Sports Injuries in Adolescents
Source: Research Square preprint supplement (doi:10.21203/rs.3.rs-8426574/v1), 2026-02-02
Supplement: Supplementary file 170 [file 平衡报告-张文雅-20250226131822.pdf › Plantar pressure and gait analysis/soccer/平衡报告-张文雅-20250226131822.pdf]

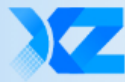

双脚重心变化

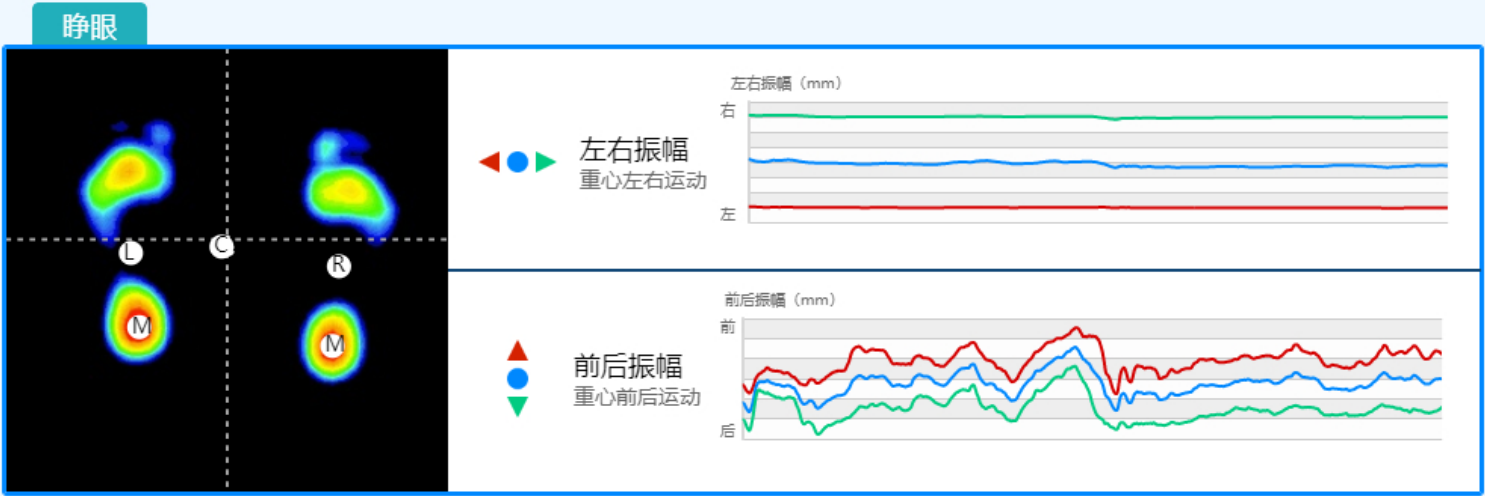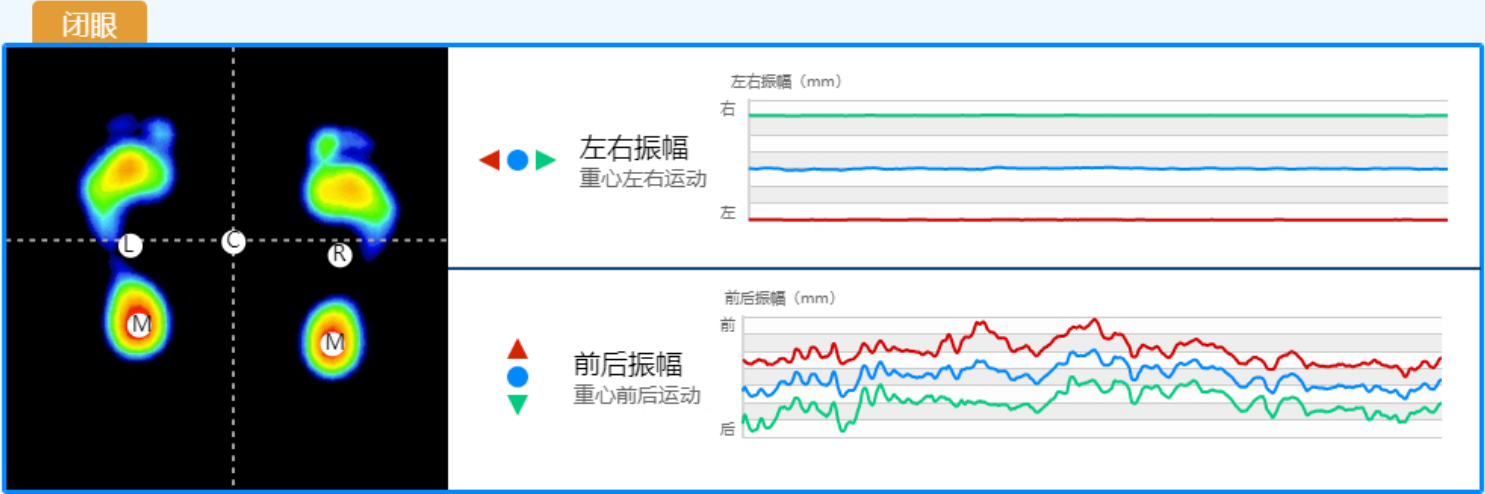

Cop数据

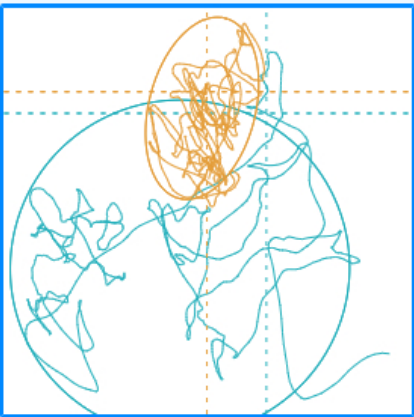

— 睁眼 — 闭眼

|             | 睁眼     | 闭眼     |
|-------------|--------|--------|
| 平均位置X【mm】   | -5.08  | 0.12   |
| 平均位置Y【mm】   | -6.25  | -1.50  |
| 标准差X【mm】    | 4.37   | 1.04   |
| 标准差Y【mm】    | 2.89   | 1.90   |
| 距离【mm】      | 182.83 | 144.10 |
| 平均速度【mm/ms】 | 0.01   | 0.00   |
| 距离/表面积      | 0.95   | 4.31   |
| 偏心率         | 0.11   | 0.82   |
| 倾斜角度【°】     | -21.44 | -75.75 |

# 平衡报告

张文雅 18岁 女 65.0kg 165.0cm 2025-2-26 13:17:15

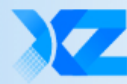

## 报告结论

睁眼  
左右晃动比前后晃动更明显  
闭眼  
前后晃动比左右晃动更明显
