# Supplementary material for: Individualized Corrective Training Based on Precision Biomechanical Assessment for the Prevention of Sports Injuries in Adolescents
Source: Research Square preprint supplement (doi:10.21203/rs.3.rs-8426574/v1), 2026-02-02
Supplement: Supplementary file 171 [file 平衡报告-张旭博-20250226115933.pdf › Plantar pressure and gait analysis/soccer/平衡报告-张旭博-20250226115933.pdf]

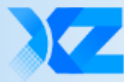

双脚重心变化

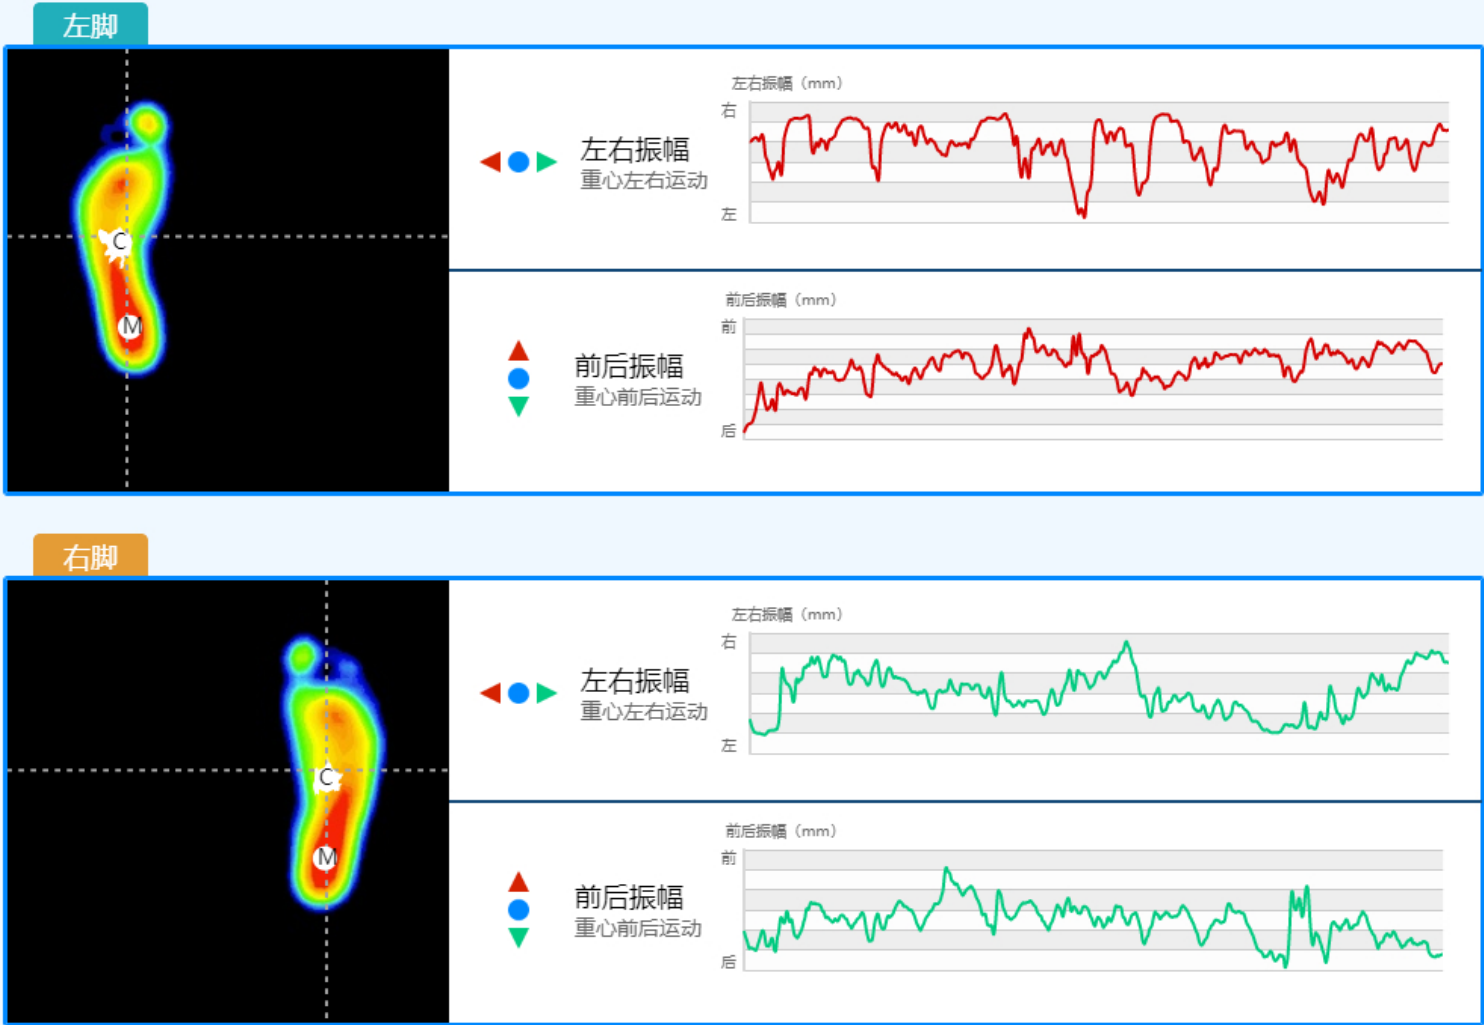

Cop数据

左脚 右脚

|             | 左脚     | 右脚     |
|-------------|--------|--------|
| 平均位置X【mm】   | -6.07  | 0.13   |
| 平均位置Y【mm】   | -5.97  | -8.05  |
| 标准差X【mm】    | 5.42   | 5.54   |
| 标准差Y【mm】    | 5.66   | 4.41   |
| 距离【mm】      | 733.05 | 605.00 |
| 平均速度【mm/ms】 | 0.02   | 0.02   |
| 距离/表面积      | 1.08   | 1.36   |
| 偏心率         | 0.69   | 0.31   |
| 倾斜角度【°】     | -6.33  | -8.51  |

# 平衡报告

张旭博 20岁 男 67.0kg 169.0cm 2025-2-26 11:46:07

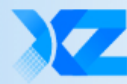

## 报告结论

睁眼  
左右振幅大于参考值  
左右晃动比前后晃动更明显
