# Supplementary material for: Individualized Corrective Training Based on Precision Biomechanical Assessment for the Prevention of Sports Injuries in Adolescents
Source: Research Square preprint supplement (doi:10.21203/rs.3.rs-8426574/v1), 2026-02-02
Supplement: Supplementary file 173 [file 平衡报告-曾颖雯-20250226124115.pdf › Plantar pressure and gait analysis/soccer/平衡报告-曾颖雯-20250226124115.pdf]

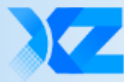

双脚重心变化

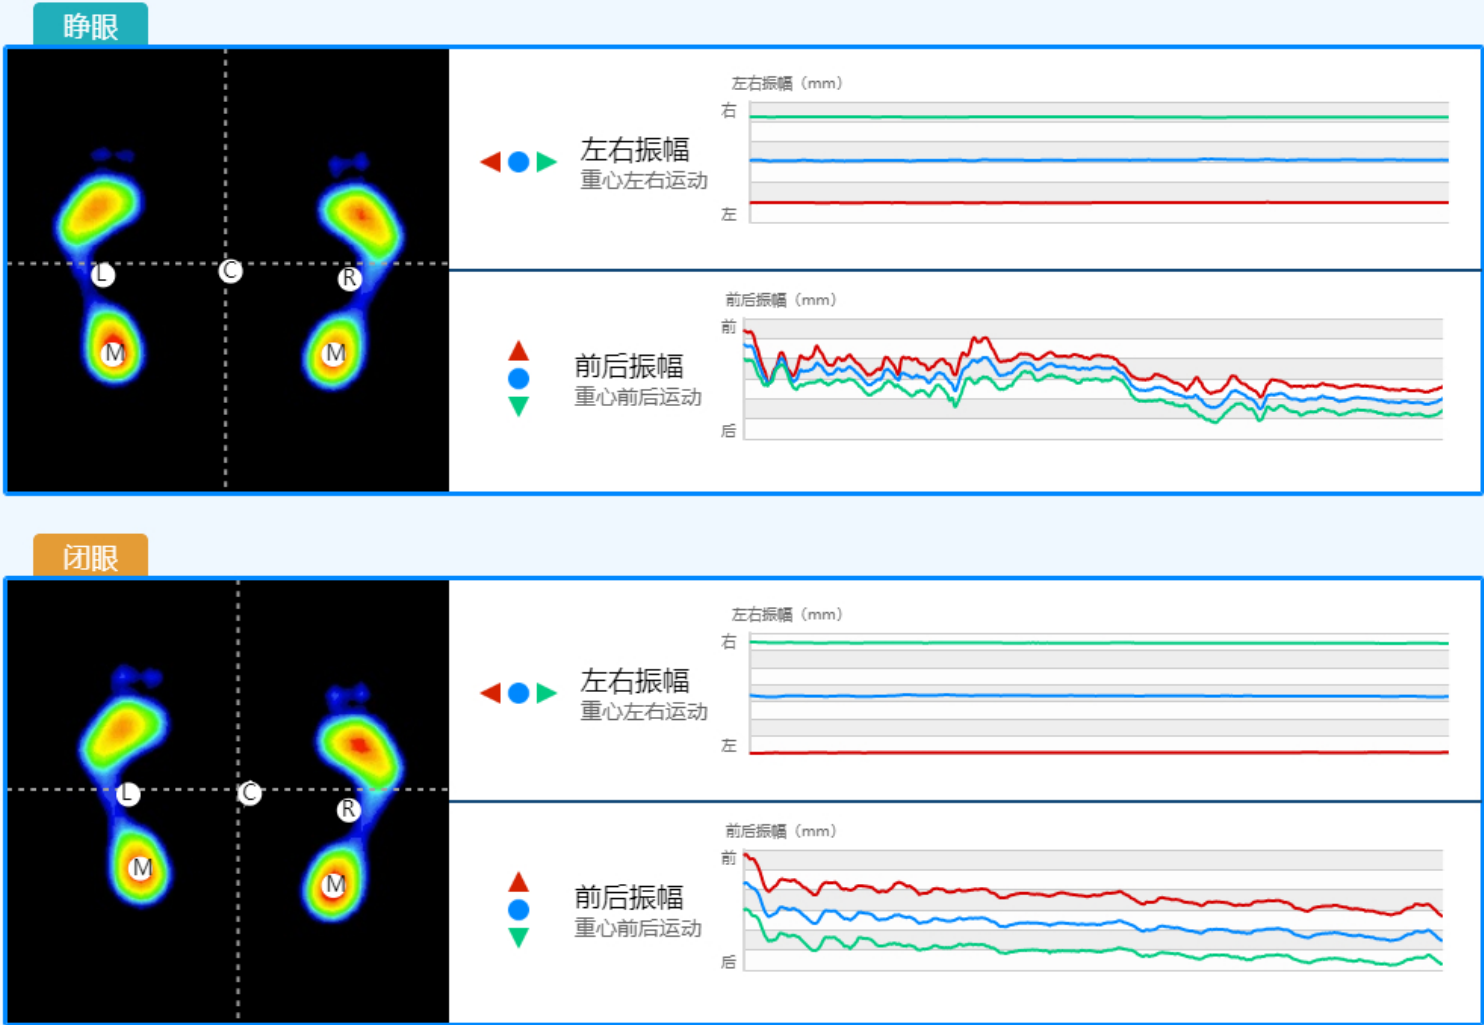

Cop数据

|             | 睁眼     | 闭眼    |
|-------------|--------|-------|
| 平均位置X【mm】   | 4.45   | 10.13 |
| 平均位置Y【mm】   | -6.63  | -3.64 |
| 标准差X【mm】    | 0.98   | 0.75  |
| 标准差Y【mm】    | 2.27   | 2.44  |
| 距离【mm】      | 104.05 | 82.40 |
| 平均速度【mm/ms】 | 0.00   | 0.00  |
| 距离/表面积      | 3.42   | 1.64  |
| 偏心率         | 0.92   | 0.95  |
| 倾斜角度【°】     | -18.53 | -0.47 |

平衡报告

曾颖雯 20岁 女 42.0kg 153.0cm 2025-2-26 12:40:02

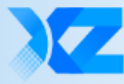

报告结论

睁眼  
前后晃动比左右晃动更明显  
闭眼  
前后晃动比左右晃动更明显
