# Supplementary material for: Individualized Corrective Training Based on Precision Biomechanical Assessment for the Prevention of Sports Injuries in Adolescents
Source: Research Square preprint supplement (doi:10.21203/rs.3.rs-8426574/v1), 2026-02-02
Supplement: Supplementary file 174 [file 平衡报告-曾颖雯-20250226124241.pdf › Plantar pressure and gait analysis/soccer/平衡报告-曾颖雯-20250226124241.pdf]

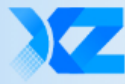

双脚重心变化

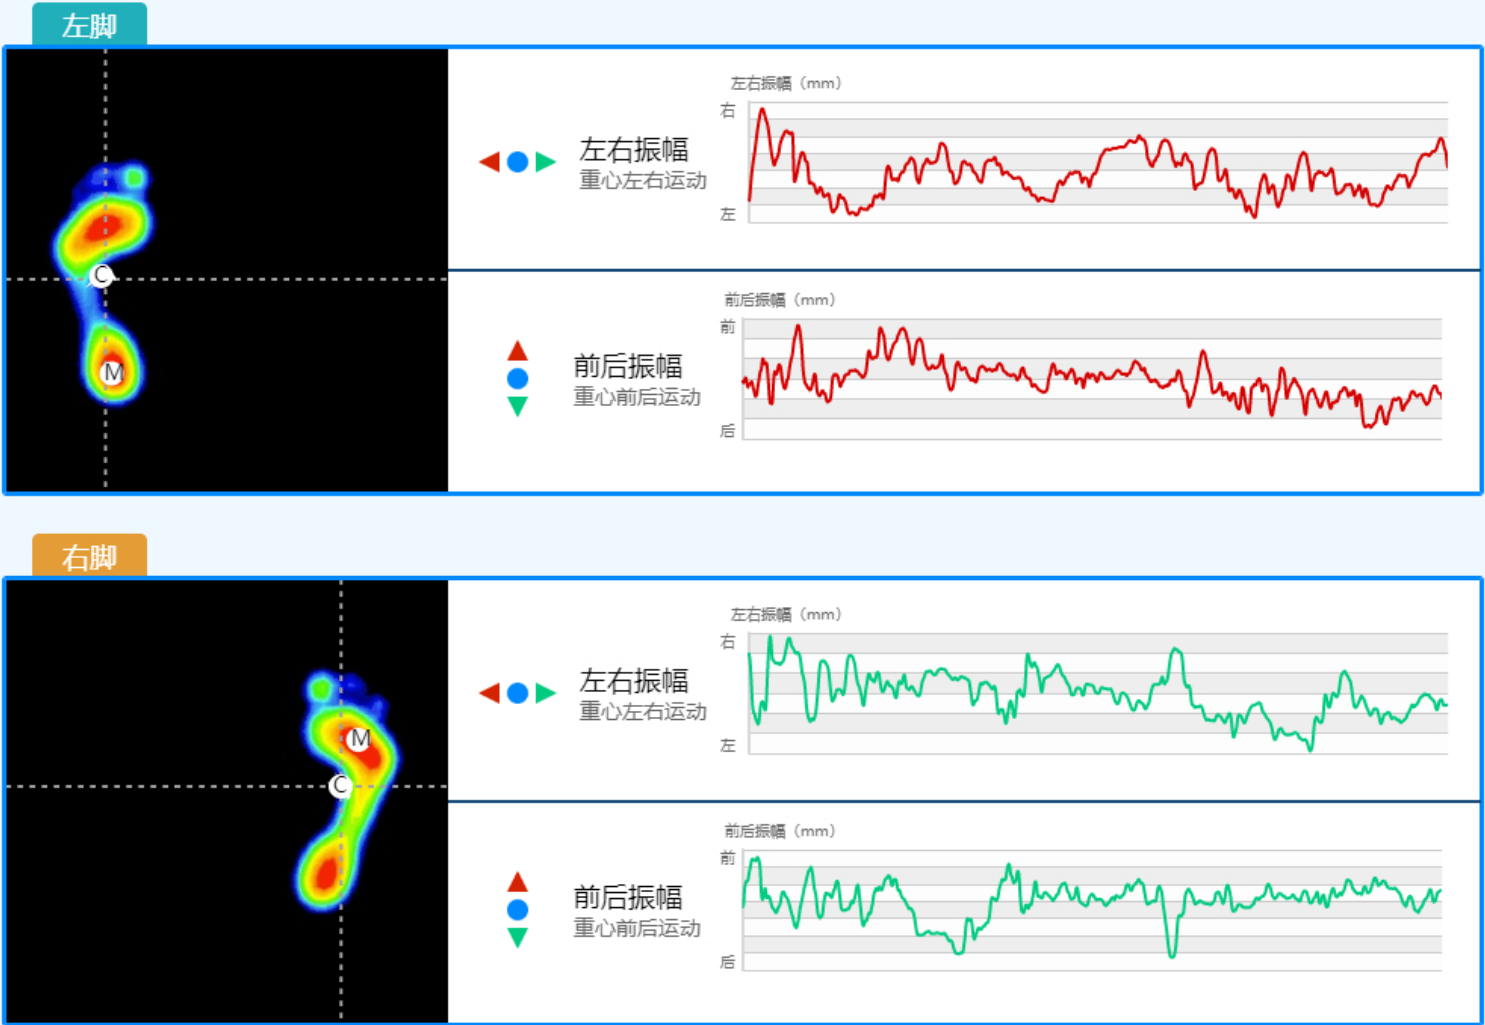

Cop数据

— 左脚    — 右脚

|             | 左脚     | 右脚     |
|-------------|--------|--------|
| 平均位置X【mm】   | -3.61  | -0.21  |
| 平均位置Y【mm】   | 2.70   | 0.09   |
| 标准差X【mm】    | 3.68   | 3.29   |
| 标准差Y【mm】    | 2.78   | 3.03   |
| 距离【mm】      | 432.61 | 425.41 |
| 平均速度【mm/ms】 | 0.01   | 0.01   |
| 距离/表面积      | 2.23   | 2.26   |
| 偏心率         | 0.72   | 0.75   |
| 倾斜角度【°】     | -16.62 | -53.81 |

# 平衡报告

曾颖雯 20岁 女 42.0kg 153.0cm 2025-2-26 12:41:32

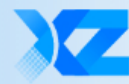

## 报告结论

睁眼  
左右晃动比前后晃动更明显
