# Supplementary material for: Individualized Corrective Training Based on Precision Biomechanical Assessment for the Prevention of Sports Injuries in Adolescents
Source: Research Square preprint supplement (doi:10.21203/rs.3.rs-8426574/v1), 2026-02-02
Supplement: Supplementary file 175 [file 平衡报告-李冰冰-20250226144312.pdf › Plantar pressure and gait analysis/soccer/平衡报告-李冰冰-20250226144312.pdf]

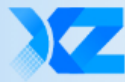

双脚重心变化

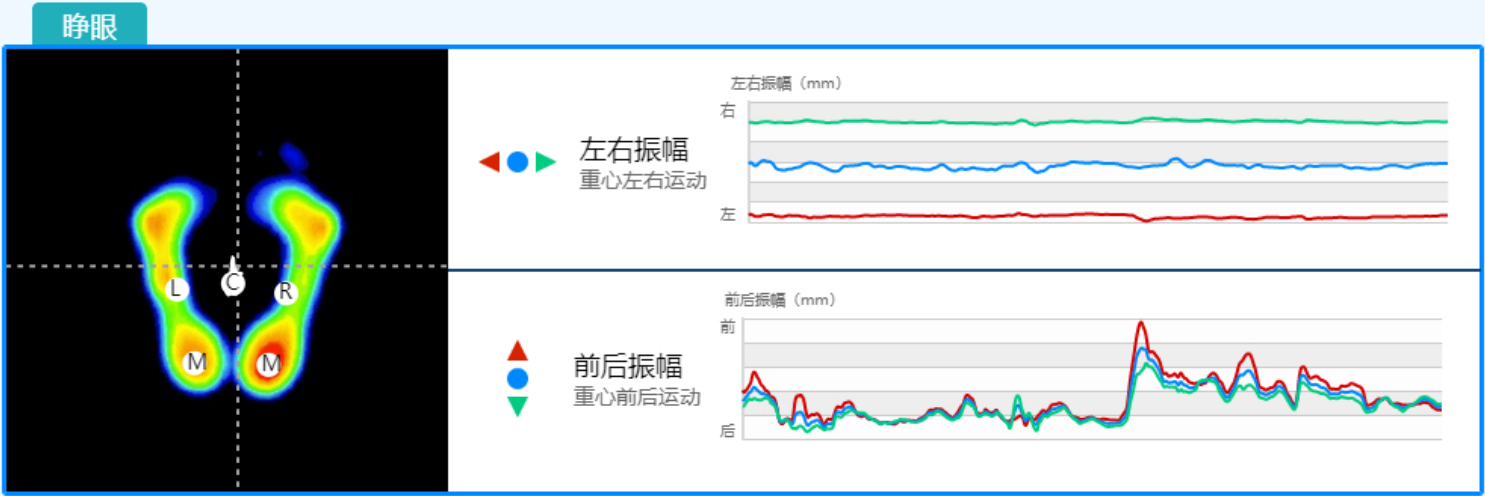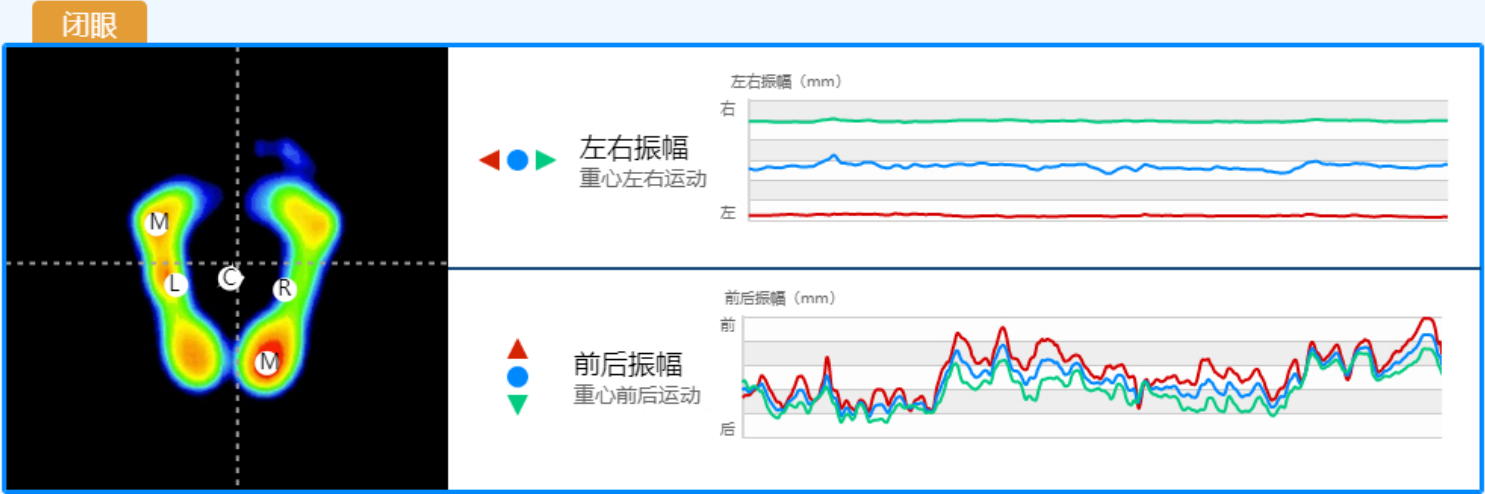

Cop数据

|             | 睁眼     | 闭眼     |
|-------------|--------|--------|
| 平均位置X【mm】   | -4.15  | -6.32  |
| 平均位置Y【mm】   | -15.18 | -13.46 |
| 标准差X【mm】    | 2.51   | 2.74   |
| 标准差Y【mm】    | 7.05   | 3.98   |
| 距离【mm】      | 366.34 | 275.07 |
| 平均速度【mm/ms】 | 0.01   | 0.01   |
| 距离/表面积      | 1.31   | 1.53   |
| 偏心率         | 0.94   | 0.55   |
| 倾斜角度【°】     | -78.56 | -51.46 |

# 平衡报告

李冰冰 22岁 女 68.0kg 168.0cm 2025-2-26 14:42:04

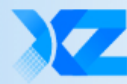

## 报告结论

睁眼  
前后振幅大于参考值  
前后晃动比左右晃动更明显  
闭眼  
前后晃动比左右晃动更明显
