# Supplementary material for: Individualized Corrective Training Based on Precision Biomechanical Assessment for the Prevention of Sports Injuries in Adolescents
Source: Research Square preprint supplement (doi:10.21203/rs.3.rs-8426574/v1), 2026-02-02
Supplement: Supplementary file 178 [file 平衡报告-林茜-20250226093221.pdf › Plantar pressure and gait analysis/soccer/平衡报告-林茜-20250226093221.pdf]

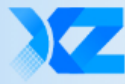

双脚重心变化

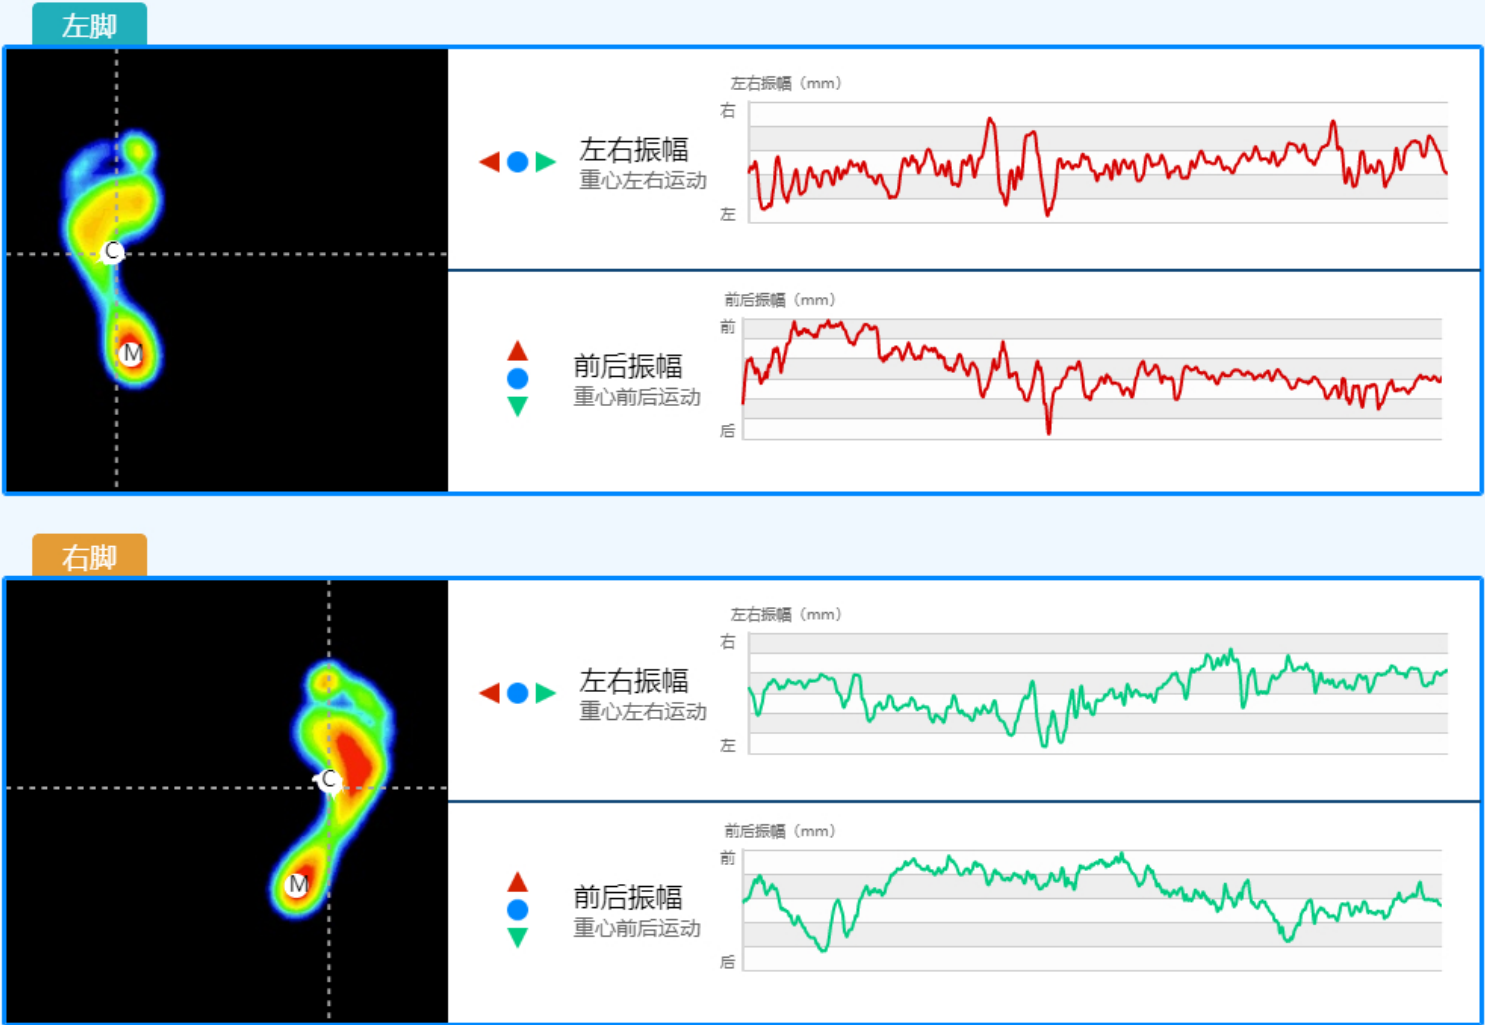

Cop数据

|  | 左脚          | 右脚     |
|--|-------------|--------|
|  | 平均位置X【mm】   | 0.40   |
|  | 平均位置Y【mm】   | 5.96   |
|  | 标准差X【mm】    | 4.75   |
|  | 标准差Y【mm】    | 4.45   |
|  | 距离【mm】      | 543.01 |
|  | 平均速度【mm/ms】 | 0.02   |
|  | 距离/表面积      | 1.90   |
|  | 偏心率         | 0.75   |
|  | 倾斜角度【°】     | -52.46 |

平衡报告

林茜 20岁 女 55.0kg 160.0cm 2025-2-26 09:31:09

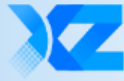

报告结论

睁眼  
左右晃动比前后晃动更明显
