# Supplementary material for: Individualized Corrective Training Based on Precision Biomechanical Assessment for the Prevention of Sports Injuries in Adolescents
Source: Research Square preprint supplement (doi:10.21203/rs.3.rs-8426574/v1), 2026-02-02
Supplement: Supplementary file 179 [file 平衡报告-柳丹琦-20250226120353.pdf › Plantar pressure and gait analysis/soccer/平衡报告-柳丹琦-20250226120353.pdf]

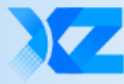

双脚重心变化

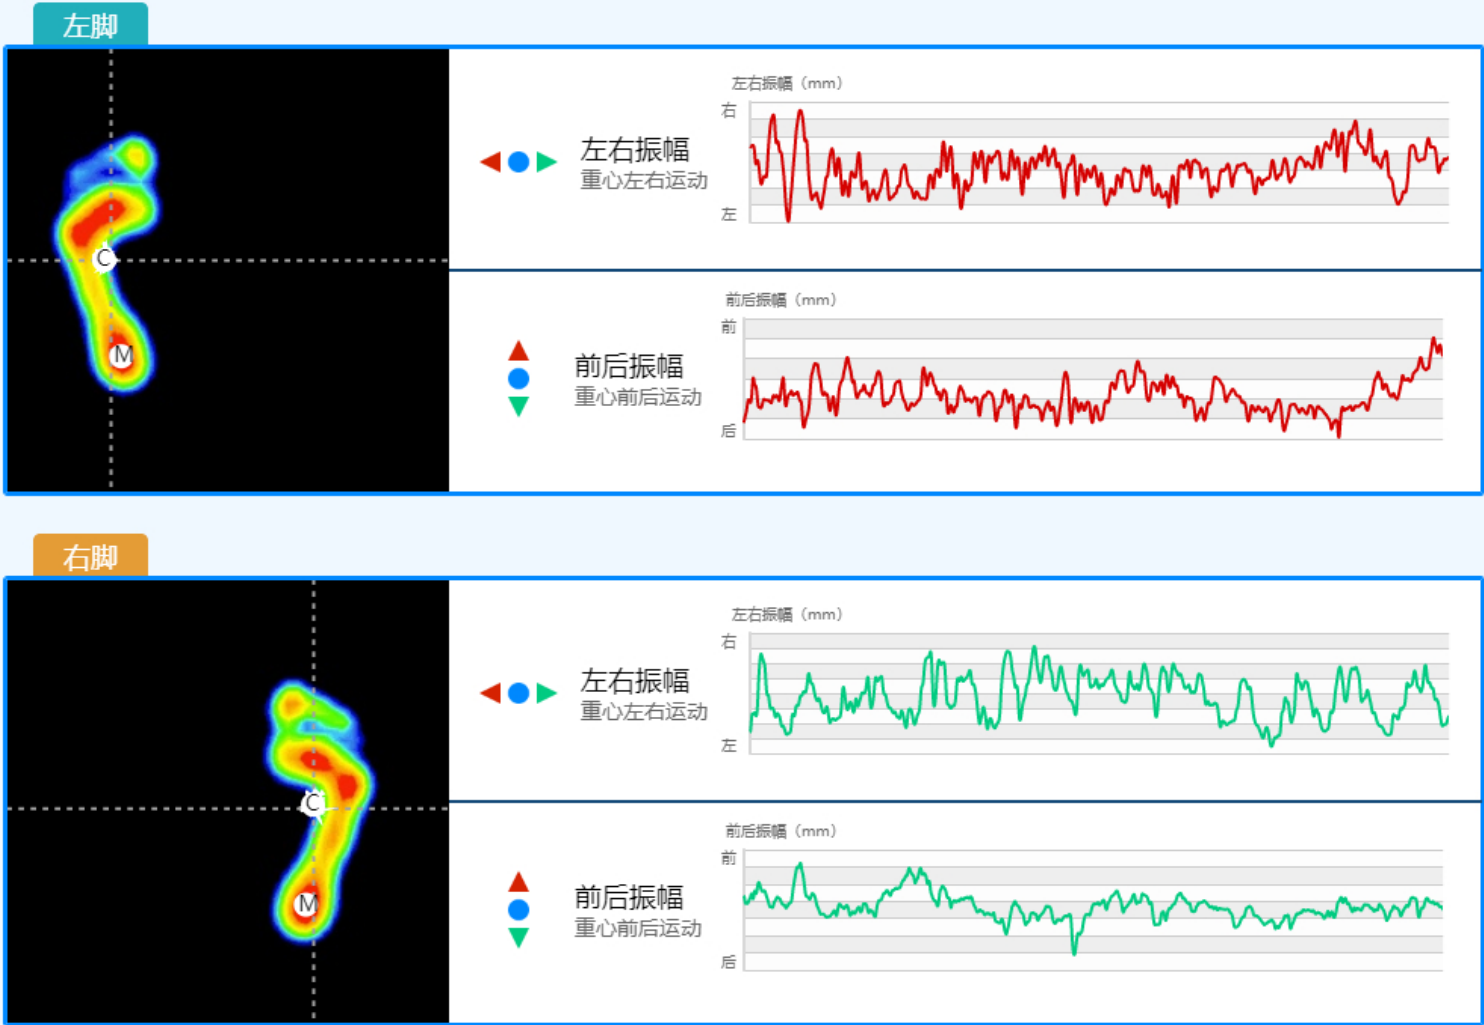

Cop数据

左脚 右脚

|             | 左脚     | 右脚     |
|-------------|--------|--------|
| 平均位置X【mm】   | -5.99  | -0.73  |
| 平均位置Y【mm】   | 0.57   | 3.45   |
| 标准差X【mm】    | 3.29   | 4.19   |
| 标准差Y【mm】    | 4.01   | 3.65   |
| 距离【mm】      | 850.89 | 722.51 |
| 平均速度【mm/ms】 | 0.03   | 0.02   |
| 距离/表面积      | 2.96   | 1.96   |
| 偏心率         | 0.30   | 0.64   |
| 倾斜角度【°】     | -43.48 | -74.57 |

# 平衡报告

柳丹琦 21岁 女 57.0kg 164.0cm 2025-2-26 11:28:03

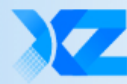

## 报告结论

睁眼  
左右晃动比前后晃动更明显
