# Supplementary material for: Individualized Corrective Training Based on Precision Biomechanical Assessment for the Prevention of Sports Injuries in Adolescents
Source: Research Square preprint supplement (doi:10.21203/rs.3.rs-8426574/v1), 2026-02-02
Supplement: Supplementary file 181 [file 平衡报告-柳丹琦-20250304094716.pdf › Plantar pressure and gait analysis/soccer/平衡报告-柳丹琦-20250304094716.pdf]

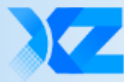

双脚重心变化

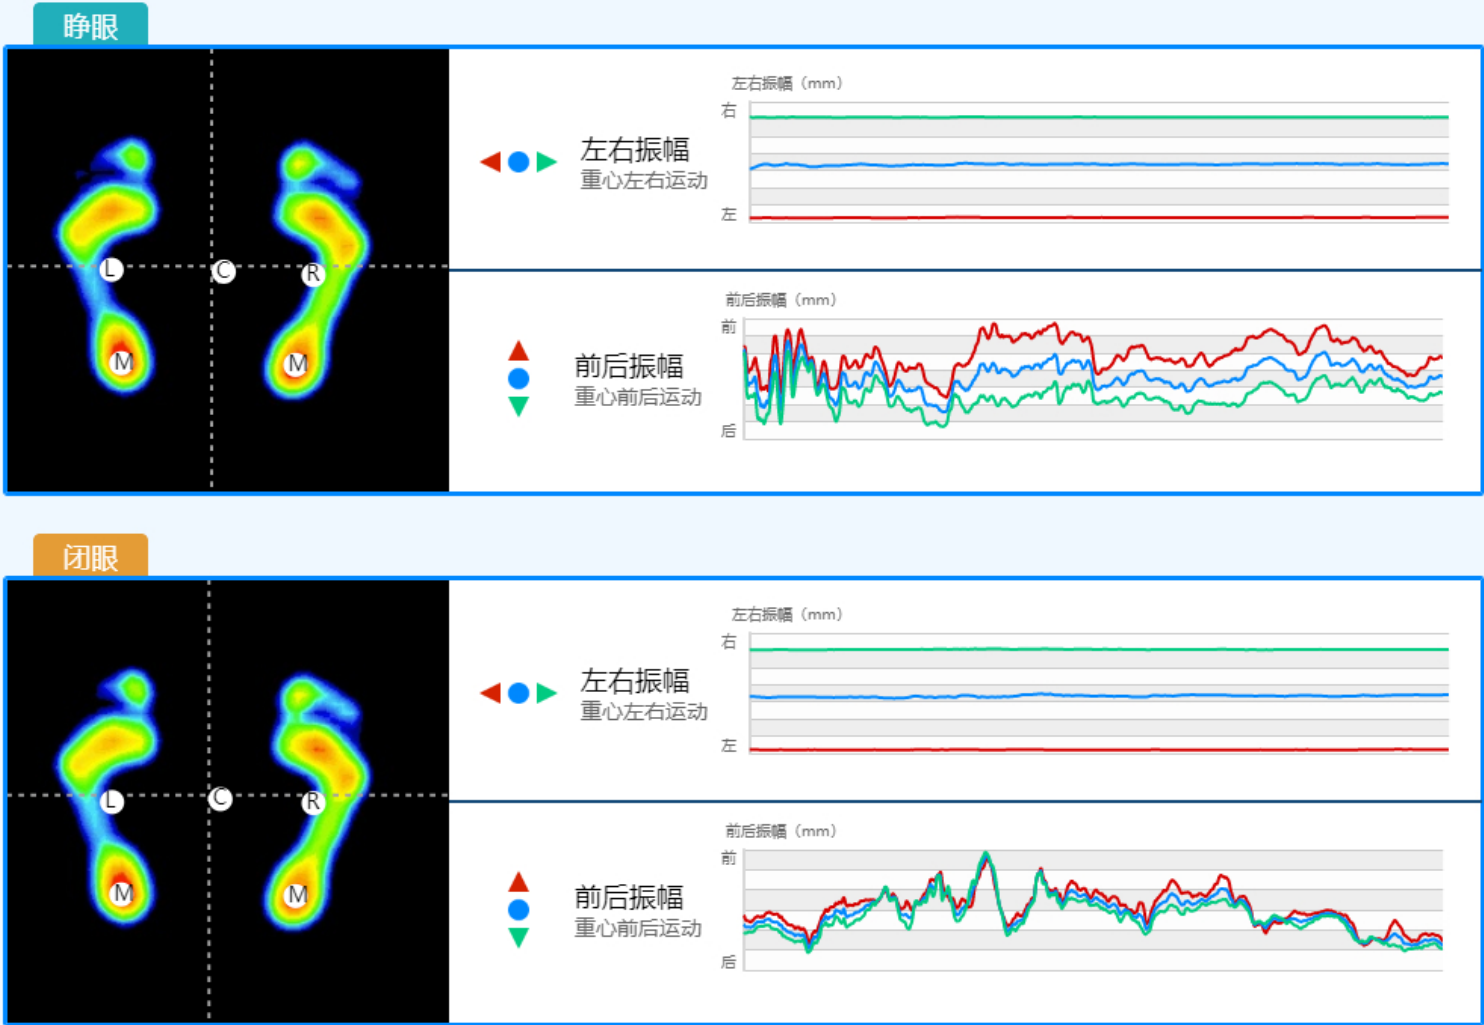

Cop数据

|             | 睁眼     | 闭眼     |
|-------------|--------|--------|
| 平均位置X【mm】   | 10.53  | 9.82   |
| 平均位置Y【mm】   | -4.77  | -3.40  |
| 标准差X【mm】    | 1.32   | 1.64   |
| 标准差Y【mm】    | 1.52   | 2.72   |
| 距离【mm】      | 168.80 | 171.88 |
| 平均速度【mm/ms】 | 0.01   | 0.01   |
| 距离/表面积      | 2.82   | 2.06   |
| 偏心率         | 0.51   | 0.82   |
| 倾斜角度【°】     | -7.13  | -80.55 |

平衡报告

柳丹琦 21岁 女 57.0kg 164.0cm 2025-2-26 11:26:40

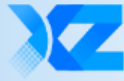

报告结论

睁眼  
前后晃动比左右晃动更明显  
闭眼  
前后晃动比左右晃动更明显
