# Supplementary material for: Individualized Corrective Training Based on Precision Biomechanical Assessment for the Prevention of Sports Injuries in Adolescents
Source: Research Square preprint supplement (doi:10.21203/rs.3.rs-8426574/v1), 2026-02-02
Supplement: Supplementary file 182 [file 平衡报告-梁栋-20250226105843.pdf › Plantar pressure and gait analysis/soccer/平衡报告-梁栋-20250226105843.pdf]

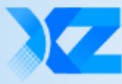

双脚重心变化

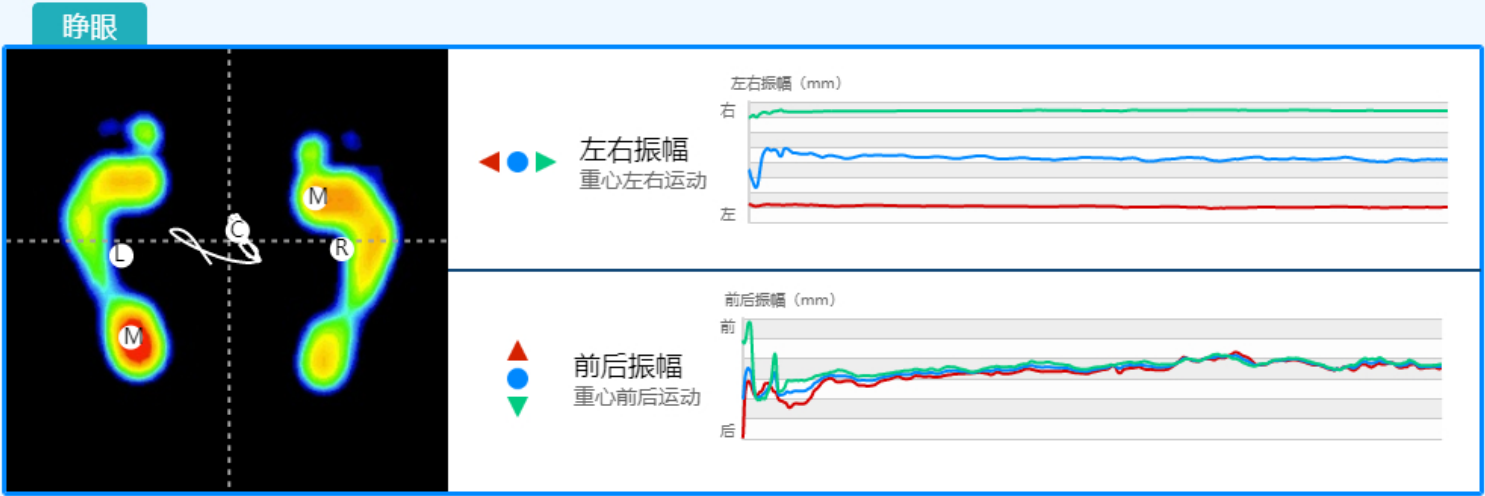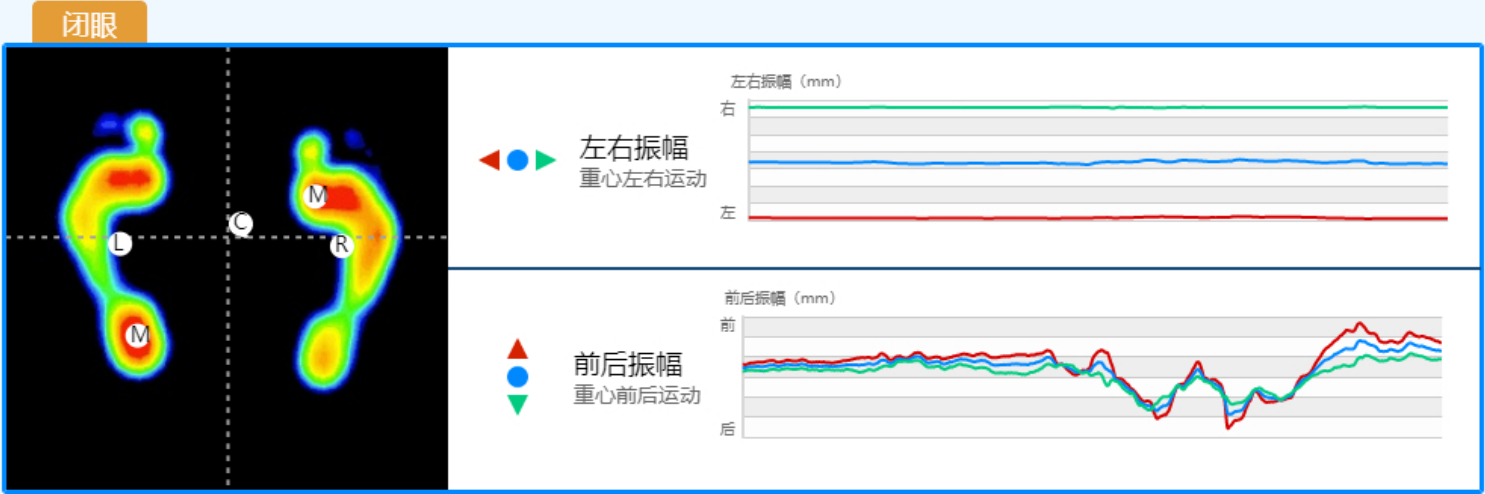

Cop数据

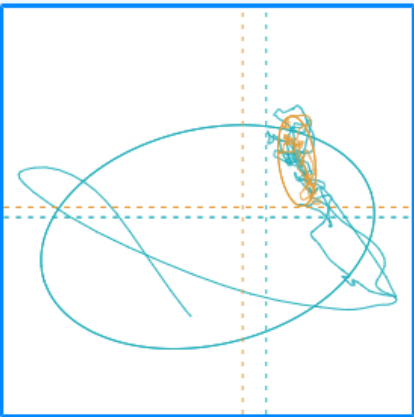

— 睁眼 — 闭眼

|             | 睁眼     | 闭眼     |
|-------------|--------|--------|
| 平均位置X【mm】   | 7.25   | 11.07  |
| 平均位置Y【mm】   | 8.91   | 11.76  |
| 标准差X【mm】    | 7.44   | 1.97   |
| 标准差Y【mm】    | 8.79   | 4.27   |
| 距离【mm】      | 442.60 | 127.02 |
| 平均速度【mm/ms】 | 0.01   | 0.00   |
| 距离/表面积      | 0.18   | 1.16   |
| 偏心率         | 0.77   | 0.92   |
| 倾斜角度【°】     | -13.48 | -7.20  |

# 平衡报告

梁栋 20岁 男 73.0kg 171.0cm 2025-2-26 10:57:38

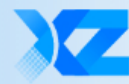

## 报告结论

睁眼  
左右振幅大于参考值  
前后振幅大于参考值  
前后晃动比左右晃动更明显  
闭眼  
身体重心位于右前方  
前后晃动比左右晃动更明显
