# Supplementary material for: Individualized Corrective Training Based on Precision Biomechanical Assessment for the Prevention of Sports Injuries in Adolescents
Source: Research Square preprint supplement (doi:10.21203/rs.3.rs-8426574/v1), 2026-02-02
Supplement: Supplementary file 184 [file 平衡报告-王俊熙-20250226151043.pdf › Plantar pressure and gait analysis/soccer/平衡报告-王俊熙-20250226151043.pdf]

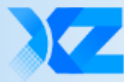

双脚重心变化

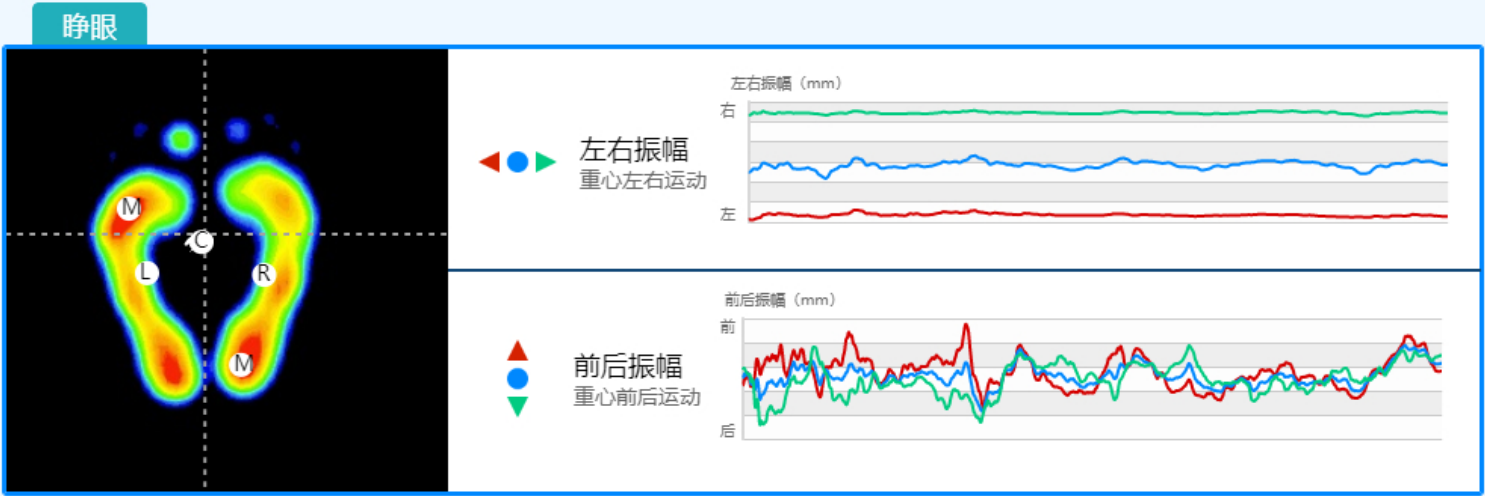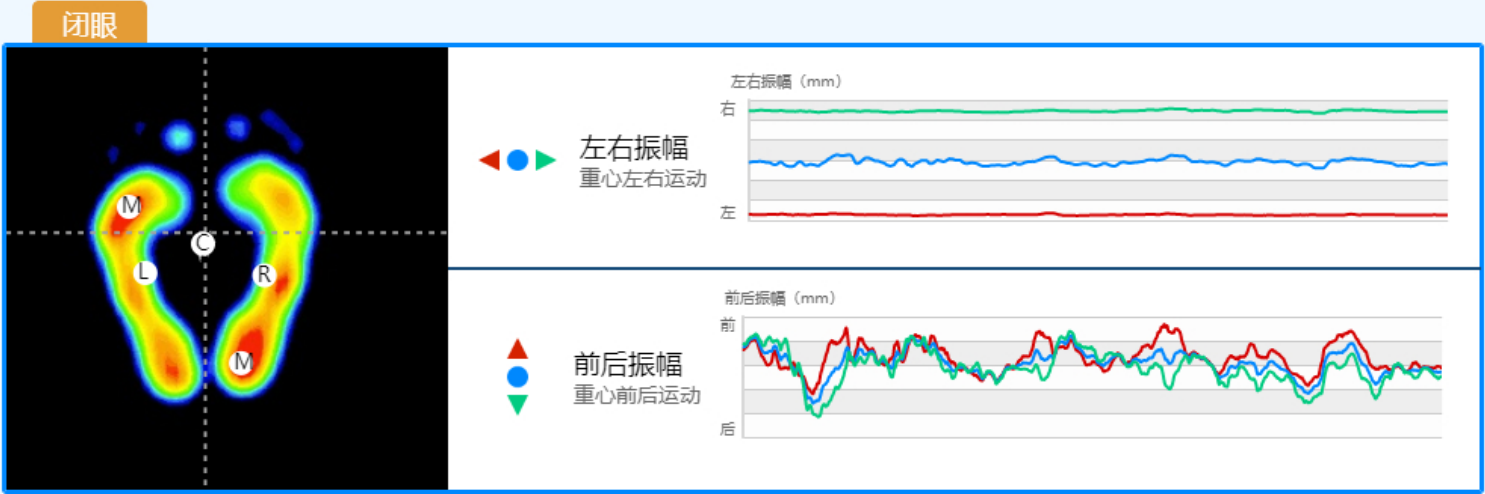

Cop数据

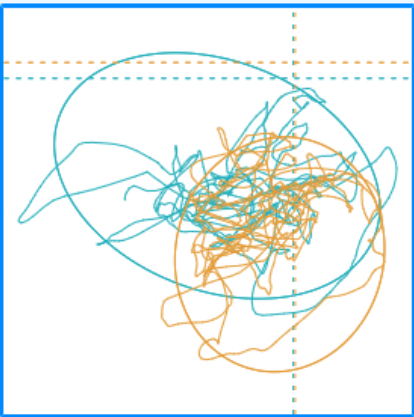

睁眼 闭眼

|             | 睁眼     | 闭眼     |
|-------------|--------|--------|
| 平均位置X【mm】   | -3.03  | -2.01  |
| 平均位置Y【mm】   | -6.90  | -9.61  |
| 标准差X【mm】    | 3.63   | 2.82   |
| 标准差Y【mm】    | 2.28   | 2.65   |
| 距离【mm】      | 301.44 | 297.46 |
| 平均速度【mm/ms】 | 0.01   | 0.01   |
| 距离/表面积      | 1.36   | 2.12   |
| 偏心率         | 0.73   | 0.48   |
| 倾斜角度【°】     | -68.76 | -78.35 |

平衡报告

王俊熙 19岁 男 61.0kg 177.0cm 2025-2-26 15:09:27

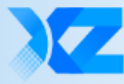

报告结论

睁眼  
左右晃动比前后晃动更明显  
闭眼  
左右晃动比前后晃动更明显
