# Supplementary material for: Individualized Corrective Training Based on Precision Biomechanical Assessment for the Prevention of Sports Injuries in Adolescents
Source: Research Square preprint supplement (doi:10.21203/rs.3.rs-8426574/v1), 2026-02-02
Supplement: Supplementary file 185 [file 平衡报告-王俊熙-20250226151156.pdf › Plantar pressure and gait analysis/soccer/平衡报告-王俊熙-20250226151156.pdf]

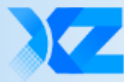

双脚重心变化

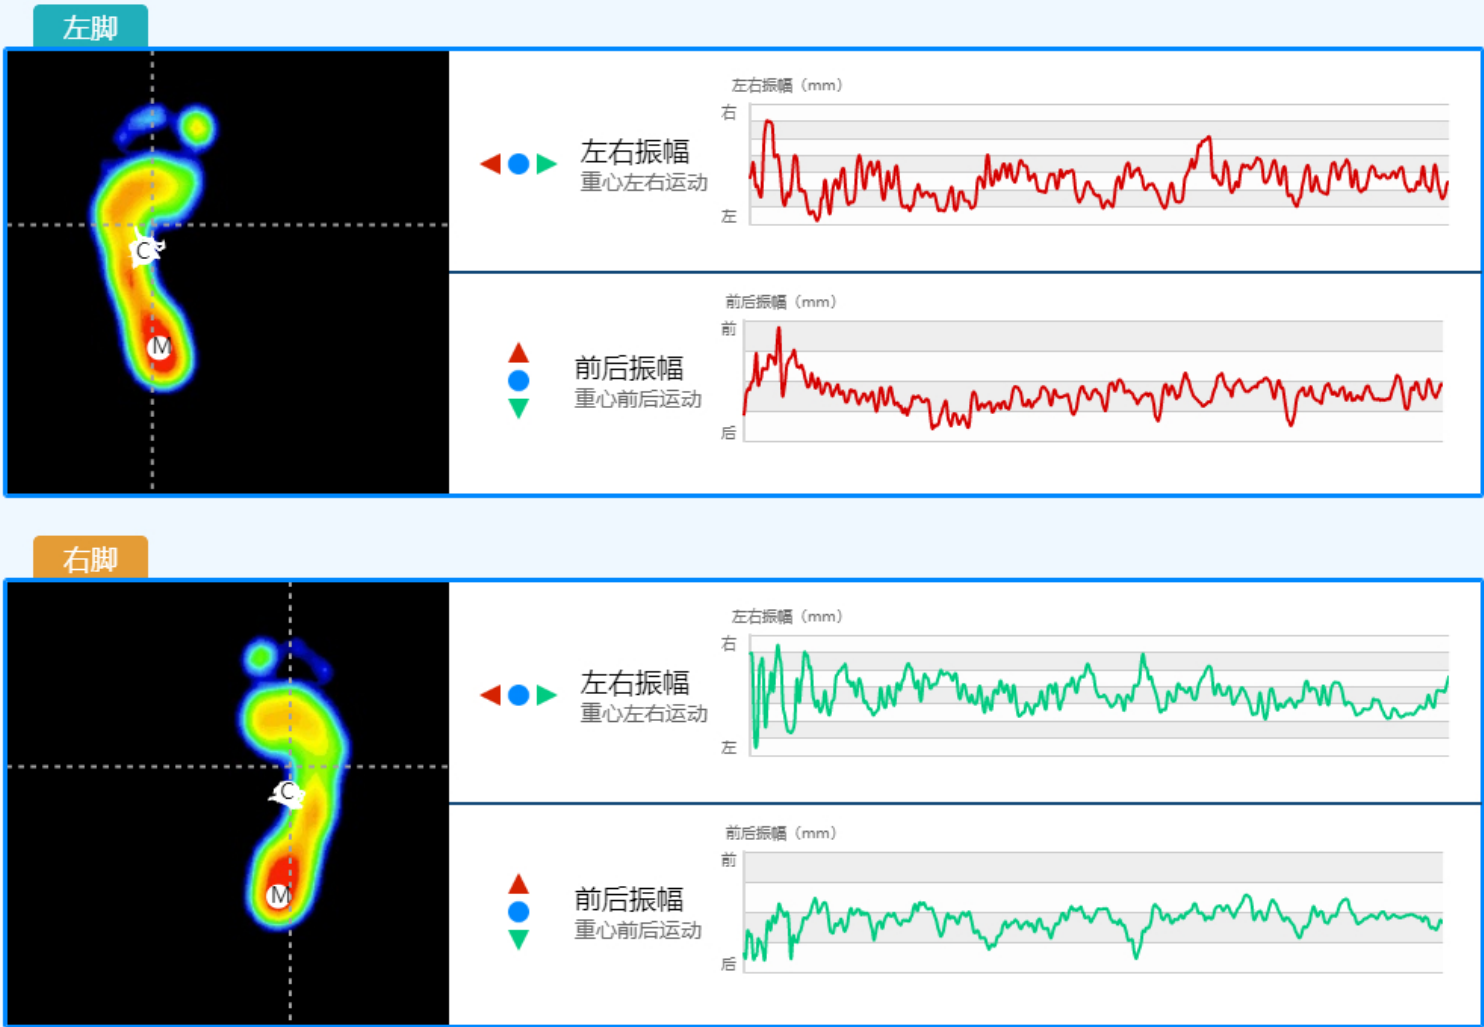

Cop数据

左脚 右脚

|             | 左脚      | 右脚     |
|-------------|---------|--------|
| 平均位置X【mm】   | -7.76   | -2.27  |
| 平均位置Y【mm】   | -24.44  | -22.66 |
| 标准差X【mm】    | 4.83    | 4.46   |
| 标准差Y【mm】    | 4.57    | 3.84   |
| 距离【mm】      | 1027.92 | 943.50 |
| 平均速度【mm/ms】 | 0.03    | 0.03   |
| 距离/表面积      | 1.44    | 2.37   |
| 偏心率         | 0.05    | 0.77   |
| 倾斜角度【°】     | -60.88  | -68.51 |

# 平衡报告

王俊熙 19岁 男 61.0kg 177.0cm 2025-2-26 15:10:48

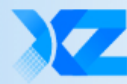

## 报告结论

睁眼  
左右晃动比前后晃动更明显
