# Supplementary material for: Individualized Corrective Training Based on Precision Biomechanical Assessment for the Prevention of Sports Injuries in Adolescents
Source: Research Square preprint supplement (doi:10.21203/rs.3.rs-8426574/v1), 2026-02-02
Supplement: Supplementary file 188 [file 平衡报告-王智丹-20250226133143.pdf › Plantar pressure and gait analysis/soccer/平衡报告-王智丹-20250226133143.pdf]

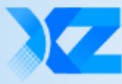

双脚重心变化

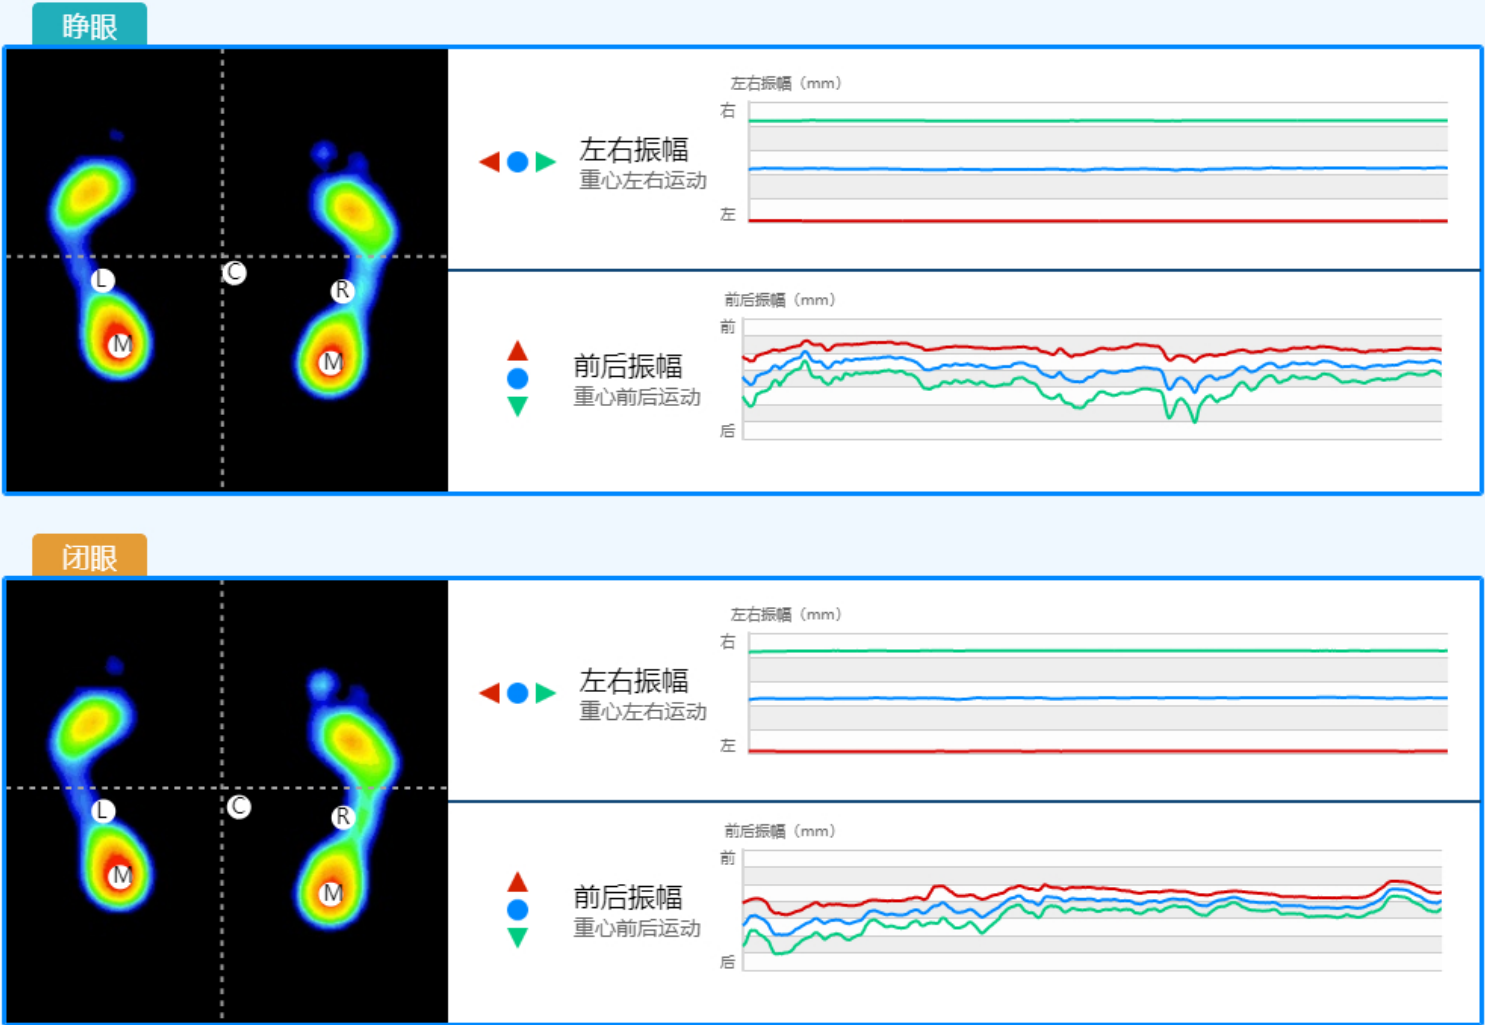

Cop数据

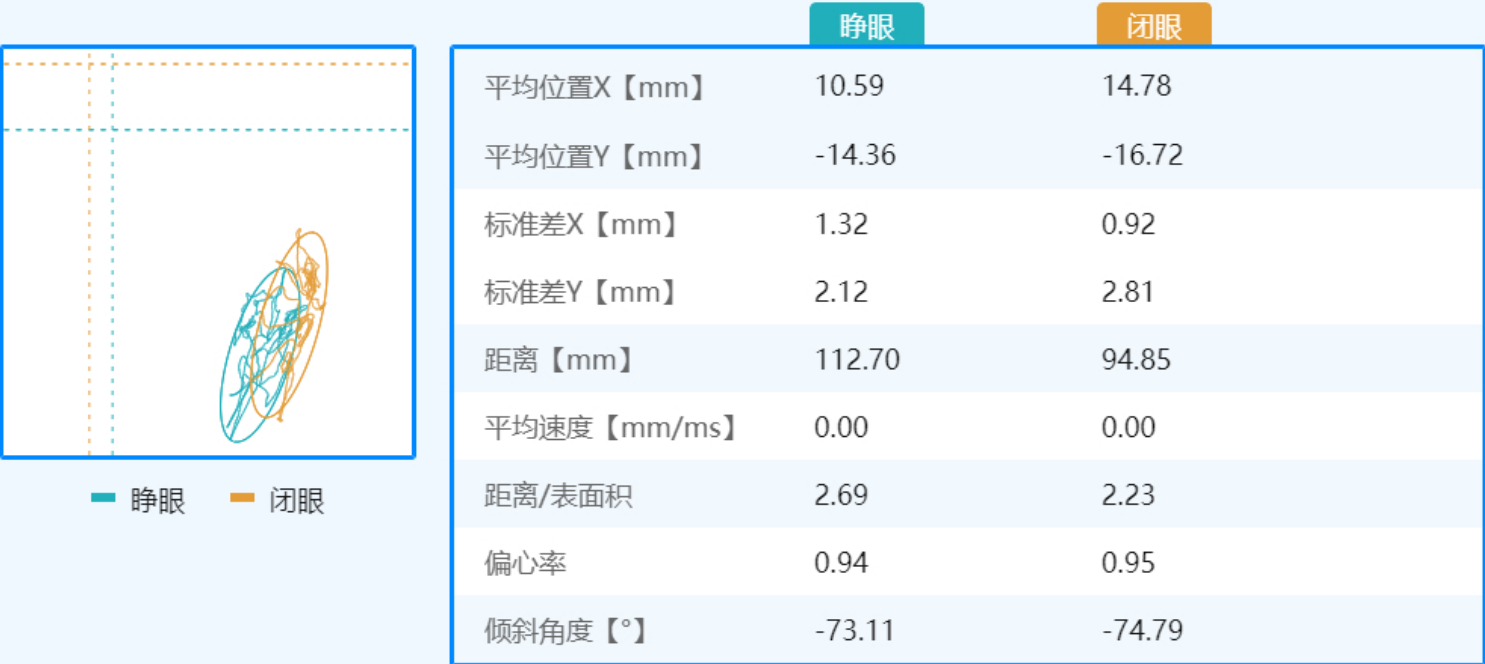

# 平衡报告

王智丹 21岁 女 70.0kg 162.0cm 2025-2-26 13:30:36

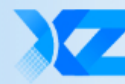

## 报告结论

睁眼  
身体重心位于右后方，骨盆右旋  
前后晃动比左右晃动更明显  
闭眼  
身体重心位于右后方，骨盆右旋  
前后晃动比左右晃动更明显
