# Supplementary material for: Individualized Corrective Training Based on Precision Biomechanical Assessment for the Prevention of Sports Injuries in Adolescents
Source: Research Square preprint supplement (doi:10.21203/rs.3.rs-8426574/v1), 2026-02-02
Supplement: Supplementary file 189 [file 平衡报告-王智丹-20250226133304.pdf › Plantar pressure and gait analysis/soccer/平衡报告-王智丹-20250226133304.pdf]

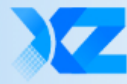

双脚重心变化

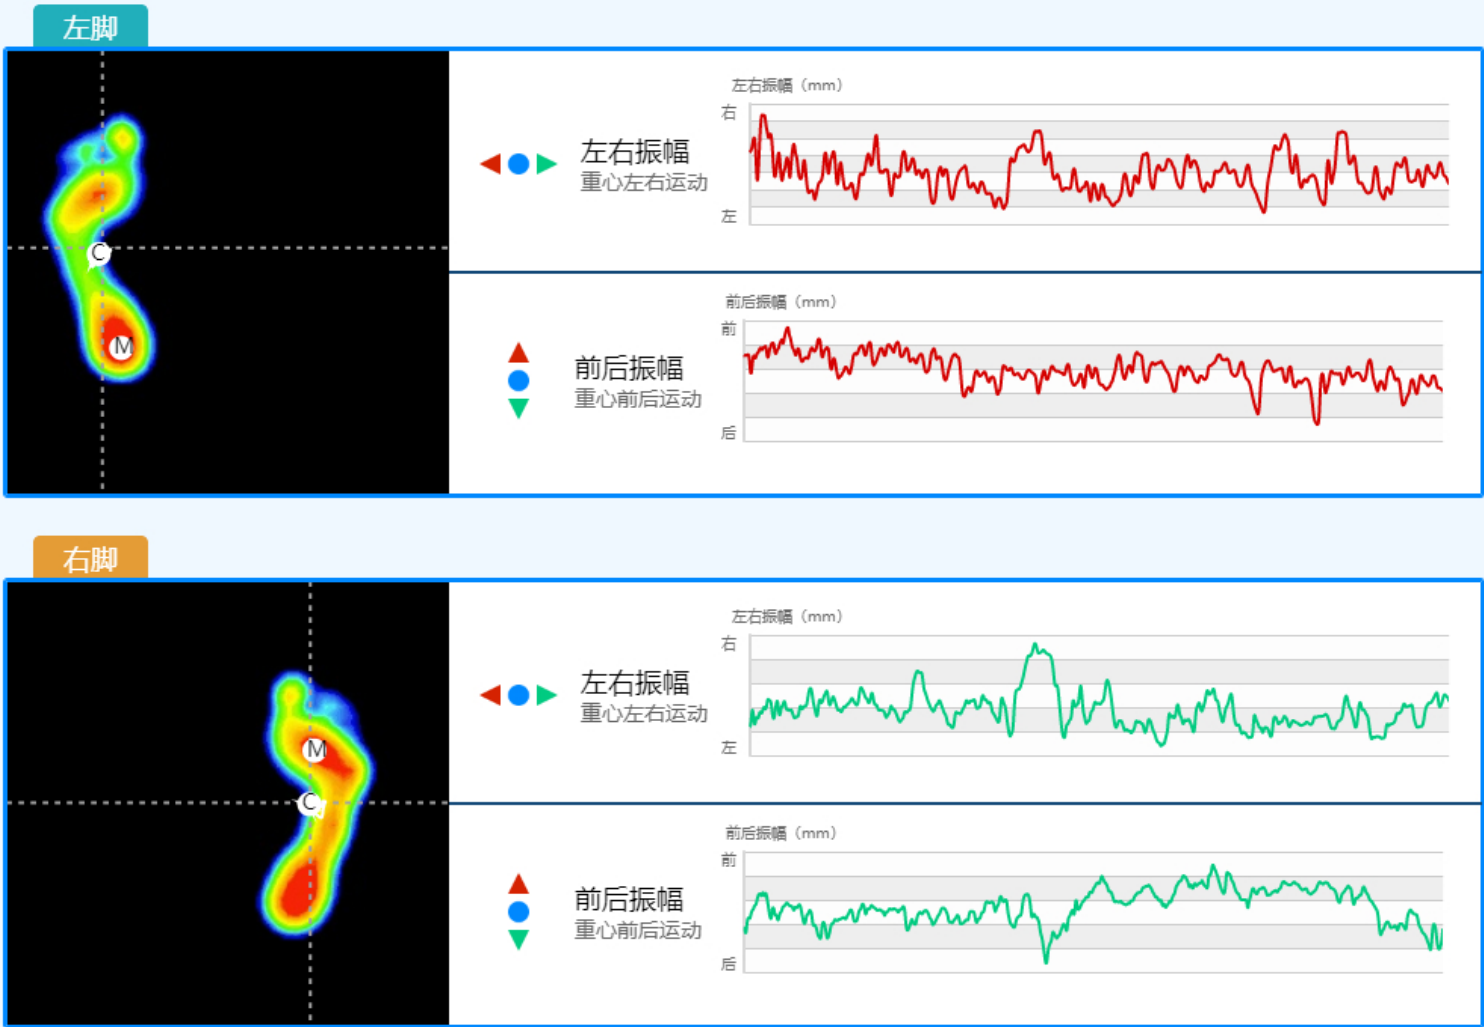

Cop数据

左脚 右脚

|             | 左脚     | 右脚     |
|-------------|--------|--------|
| 平均位置X【mm】   | -3.21  | -0.62  |
| 平均位置Y【mm】   | -5.32  | -1.33  |
| 标准差X【mm】    | 3.12   | 3.72   |
| 标准差Y【mm】    | 3.08   | 3.55   |
| 距离【mm】      | 619.15 | 521.52 |
| 平均速度【mm/ms】 | 0.02   | 0.02   |
| 距离/表面积      | 3.42   | 1.87   |
| 偏心率         | 0.87   | 0.66   |
| 倾斜角度【°】     | -39.39 | -70.85 |

# 平衡报告

王智丹 21岁 女 70.0kg 162.0cm 2025-2-26 13:31:54

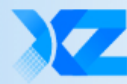

## 报告结论

睁眼  
左右晃动比前后晃动更明显
