# Supplementary material for: Individualized Corrective Training Based on Precision Biomechanical Assessment for the Prevention of Sports Injuries in Adolescents
Source: Research Square preprint supplement (doi:10.21203/rs.3.rs-8426574/v1), 2026-02-02
Supplement: Supplementary file 193 [file 平衡报告-王珊珊-20250226123640.pdf › Plantar pressure and gait analysis/soccer/平衡报告-王珊珊-20250226123640.pdf]

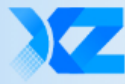

双脚重心变化

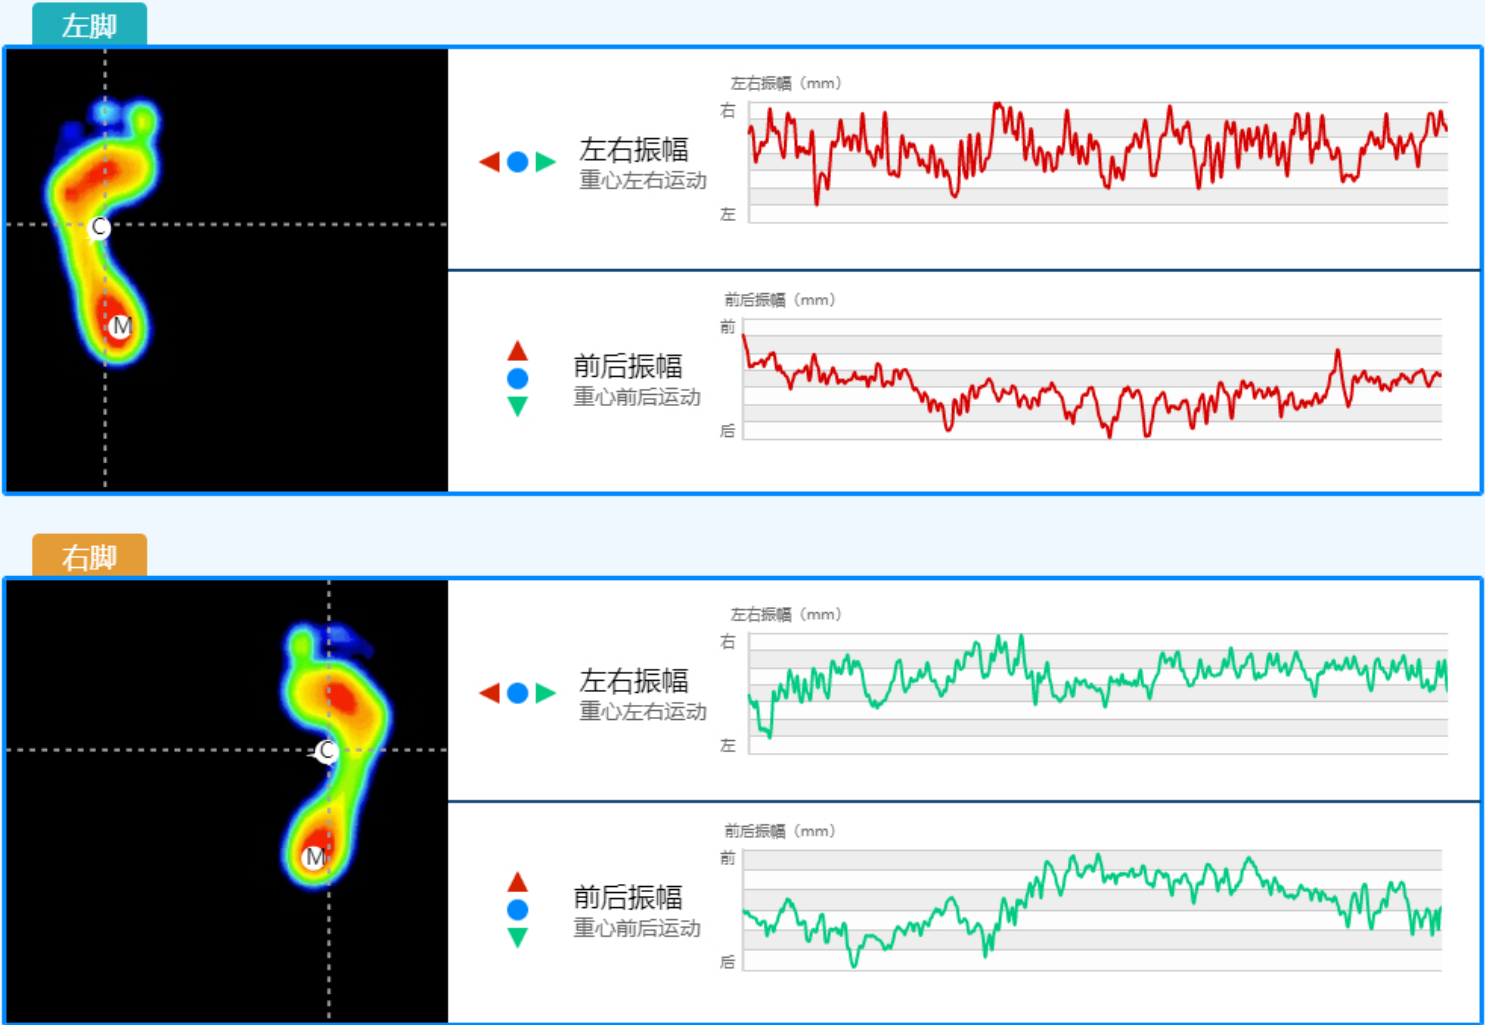

Cop数据

左脚 右脚

|             | 左脚     | 右脚     |
|-------------|--------|--------|
| 平均位置X【mm】   | -5.34  | -1.59  |
| 平均位置Y【mm】   | -3.55  | -1.92  |
| 标准差X【mm】    | 2.24   | 2.78   |
| 标准差Y【mm】    | 2.97   | 3.69   |
| 距离【mm】      | 600.10 | 558.29 |
| 平均速度【mm/ms】 | 0.02   | 0.02   |
| 距离/表面积      | 3.86   | 2.74   |
| 偏心率         | 0.69   | 0.55   |
| 倾斜角度【°】     | -40.82 | -61.13 |

# 平衡报告

王珊珊 20岁 女 66.0kg 166.0cm 2025-2-26 12:35:31

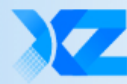

## 报告结论

睁眼  
前后晃动比左右晃动更明显
