# Supplementary material for: Individualized Corrective Training Based on Precision Biomechanical Assessment for the Prevention of Sports Injuries in Adolescents
Source: Research Square preprint supplement (doi:10.21203/rs.3.rs-8426574/v1), 2026-02-02
Supplement: Supplementary file 194 [file 平衡报告-王硕-20250226150519.pdf › Plantar pressure and gait analysis/soccer/平衡报告-王硕-20250226150519.pdf]

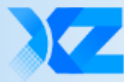

双脚重心变化

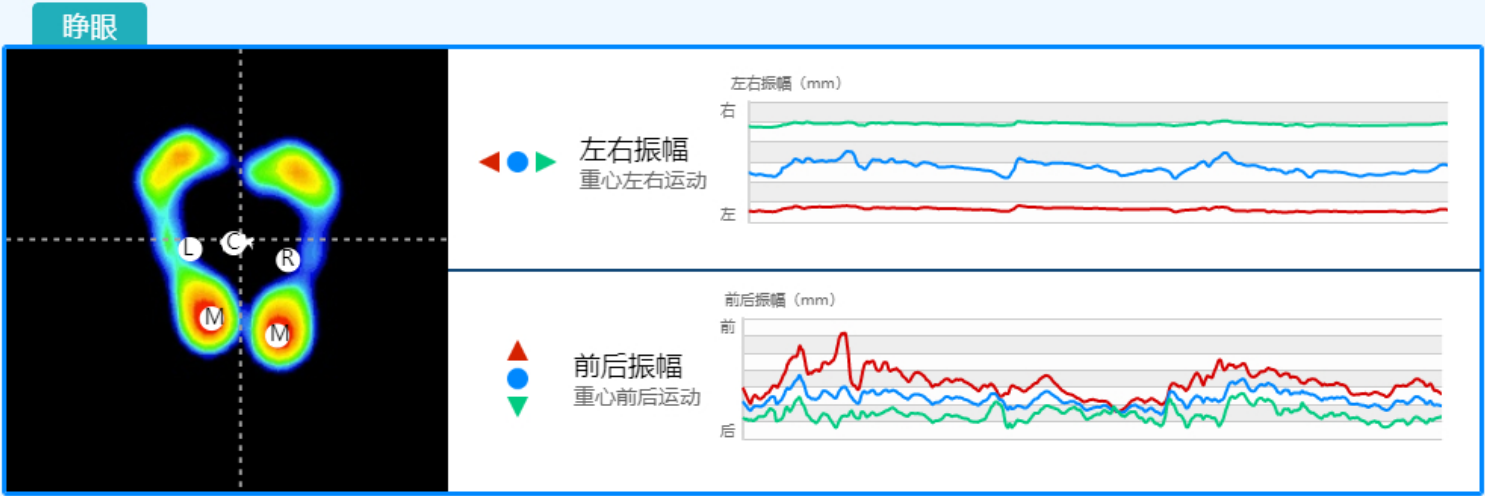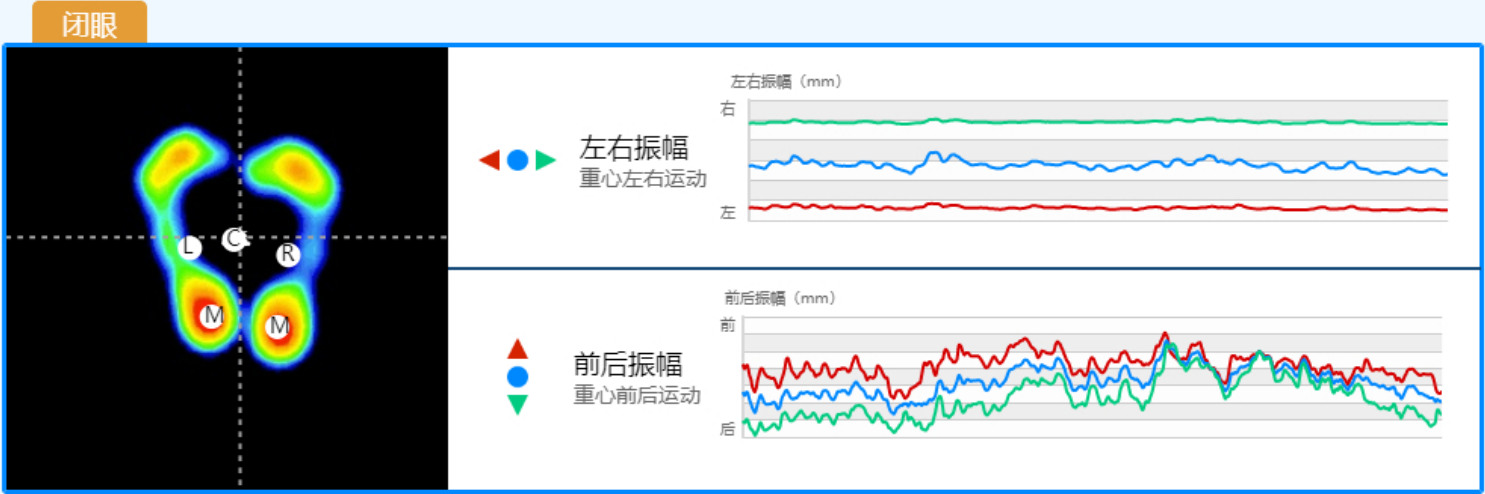

Cop数据

睁眼 闭眼

|             | 睁眼     | 闭眼     |
|-------------|--------|--------|
| 平均位置X【mm】   | -5.70  | -5.16  |
| 平均位置Y【mm】   | -3.39  | -2.37  |
| 标准差X【mm】    | 5.75   | 4.35   |
| 标准差Y【mm】    | 2.17   | 2.61   |
| 距离【mm】      | 340.69 | 358.13 |
| 平均速度【mm/ms】 | 0.01   | 0.01   |
| 距离/表面积      | 1.67   | 1.72   |
| 偏心率         | 0.93   | 0.85   |
| 倾斜角度【°】     | -9.95  | -5.82  |

# 平衡报告

王硕 21岁 男 62.0kg 170.0cm 2025-2-26 15:04:09

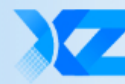

## 报告结论

睁眼  
左右振幅大于参考值  
左右晃动比前后晃动更明显  
闭眼  
左右晃动比前后晃动更明显
