# Supplementary material for: Individualized Corrective Training Based on Precision Biomechanical Assessment for the Prevention of Sports Injuries in Adolescents
Source: Research Square preprint supplement (doi:10.21203/rs.3.rs-8426574/v1), 2026-02-02
Supplement: Supplementary file 195 [file 平衡报告-王硕-20250226150635.pdf › Plantar pressure and gait analysis/soccer/平衡报告-王硕-20250226150635.pdf]

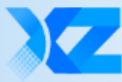

双脚重心变化

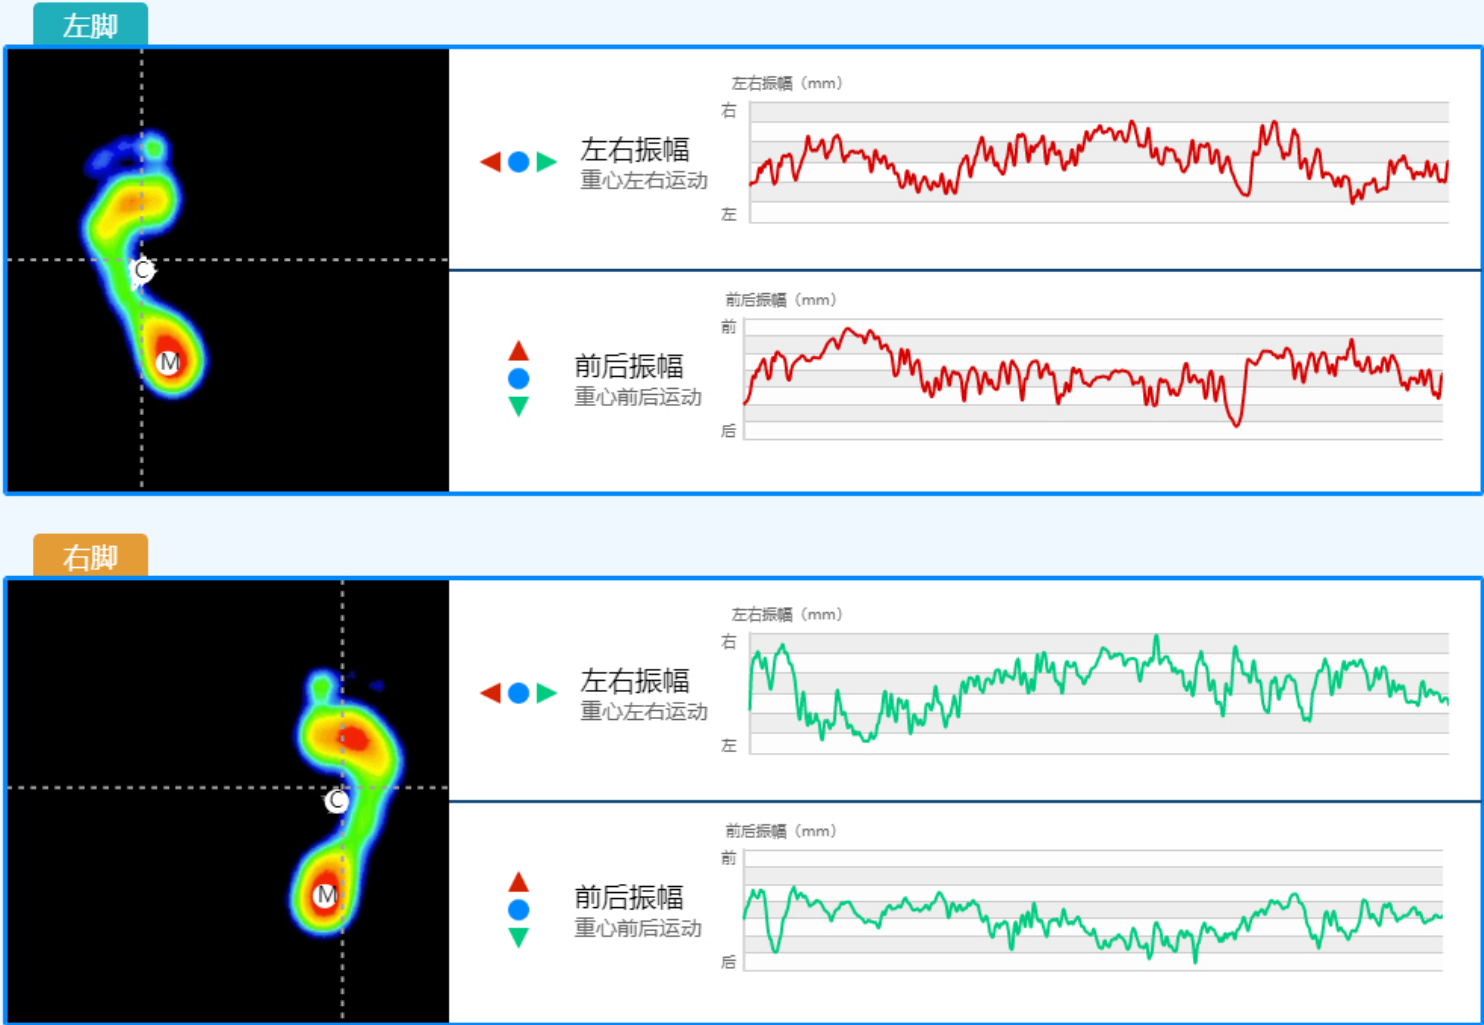

Cop数据

| <div>左脚 右脚</div> | 左脚          | 右脚     |
|------------------|-------------|--------|
|                  | 平均位置X【mm】   | -4.90  |
|                  | 平均位置Y【mm】   | -12.24 |
|                  | 标准差X【mm】    | 3.44   |
|                  | 标准差Y【mm】    | 2.66   |
|                  | 距离【mm】      | 510.77 |
|                  | 平均速度【mm/ms】 | 0.02   |
|                  | 距离/表面积      | 3.17   |
|                  | 偏心率         | 0.79   |
|                  | 倾斜角度【°】     | -63.65 |

# 平衡报告

王硕 21岁 男 62.0kg 170.0cm 2025-2-26 15:05:27

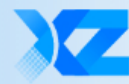

## 报告结论

睁眼  
左右晃动比前后晃动更明显
