# Supplementary material for: Individualized Corrective Training Based on Precision Biomechanical Assessment for the Prevention of Sports Injuries in Adolescents
Source: Research Square preprint supplement (doi:10.21203/rs.3.rs-8426574/v1), 2026-02-02
Supplement: Supplementary file 200 [file 平衡报告-程永慧-20250226143754.pdf › Plantar pressure and gait analysis/soccer/平衡报告-程永慧-20250226143754.pdf]

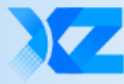

双脚重心变化

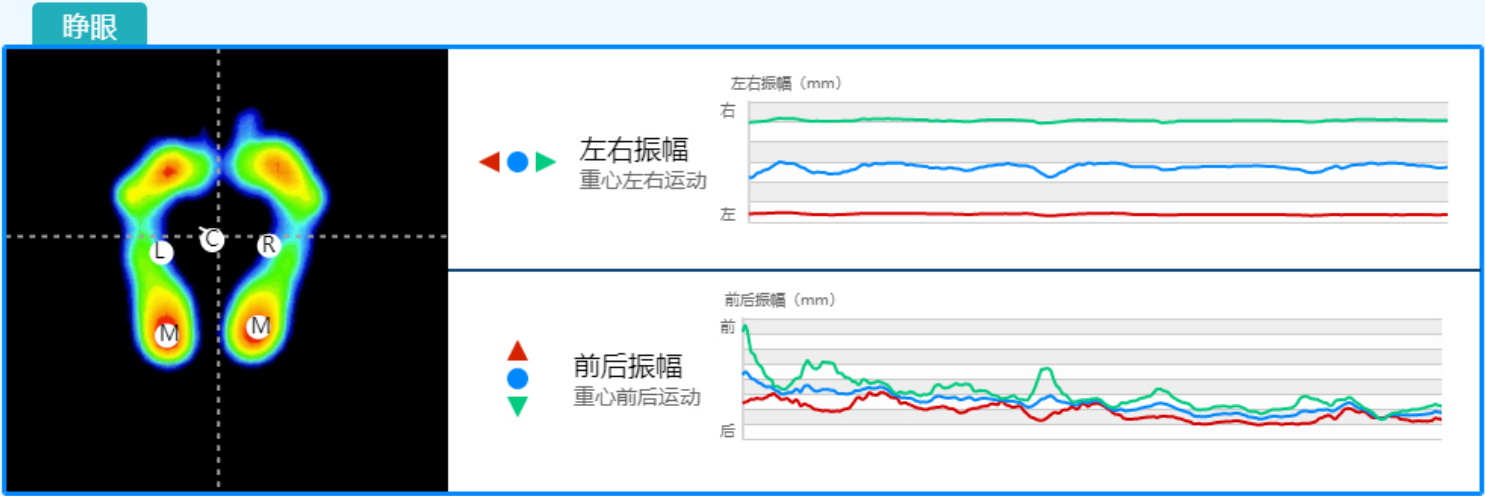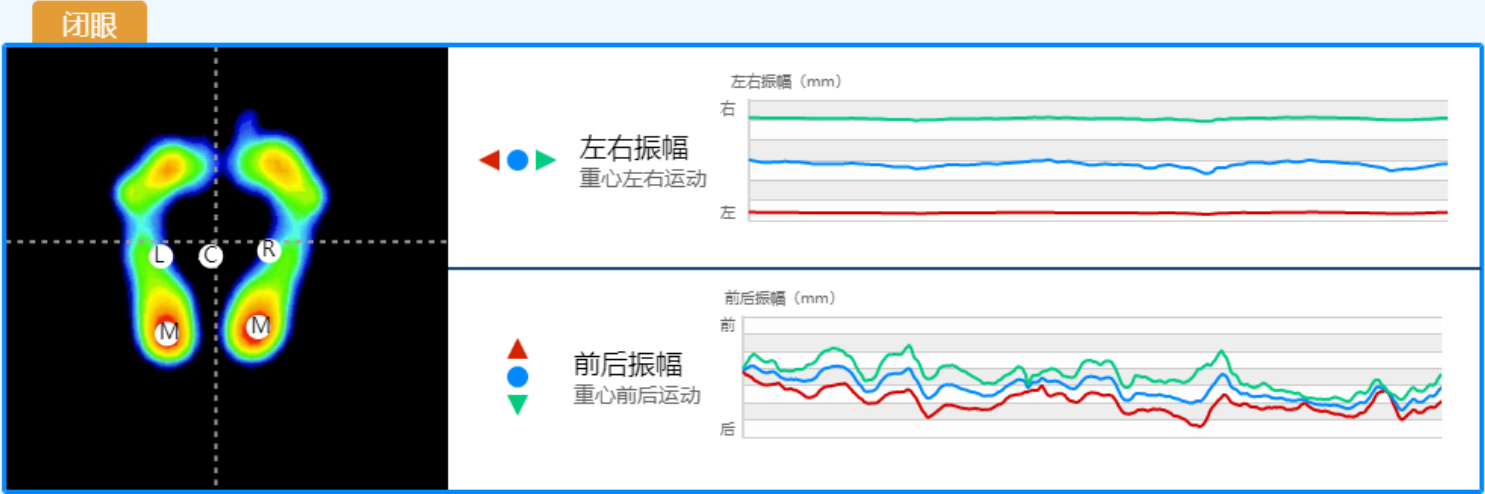

Cop数据

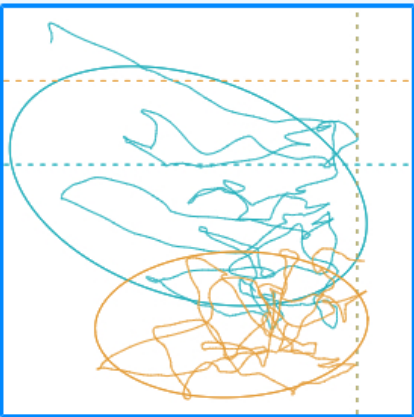

— 睁眼 — 闭眼

|             | 睁眼     | 闭眼     |
|-------------|--------|--------|
| 平均位置X【mm】   | -5.25  | -4.38  |
| 平均位置Y【mm】   | -3.28  | -12.56 |
| 标准差X【mm】    | 3.23   | 2.67   |
| 标准差Y【mm】    | 3.38   | 1.96   |
| 距离【mm】      | 172.33 | 125.36 |
| 平均速度【mm/ms】 | 0.01   | 0.00   |
| 距离/表面积      | 1.04   | 1.55   |
| 偏心率         | 0.80   | 0.84   |
| 倾斜角度【°】     | -71.02 | -2.43  |

平衡报告

程永慧 19岁 女 77.0kg 165.0cm 2025-2-26 14:36:46

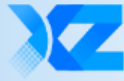

报告结论

睁眼  
前后晃动比左右晃动更明显  
闭眼  
左右晃动比前后晃动更明显
