# Supplementary material for: Individualized Corrective Training Based on Precision Biomechanical Assessment for the Prevention of Sports Injuries in Adolescents
Source: Research Square preprint supplement (doi:10.21203/rs.3.rs-8426574/v1), 2026-02-02
Supplement: Supplementary file 202 [file 平衡报告-罗桃红-20250226134205.pdf › Plantar pressure and gait analysis/soccer/平衡报告-罗桃红-20250226134205.pdf]

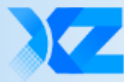

双脚重心变化

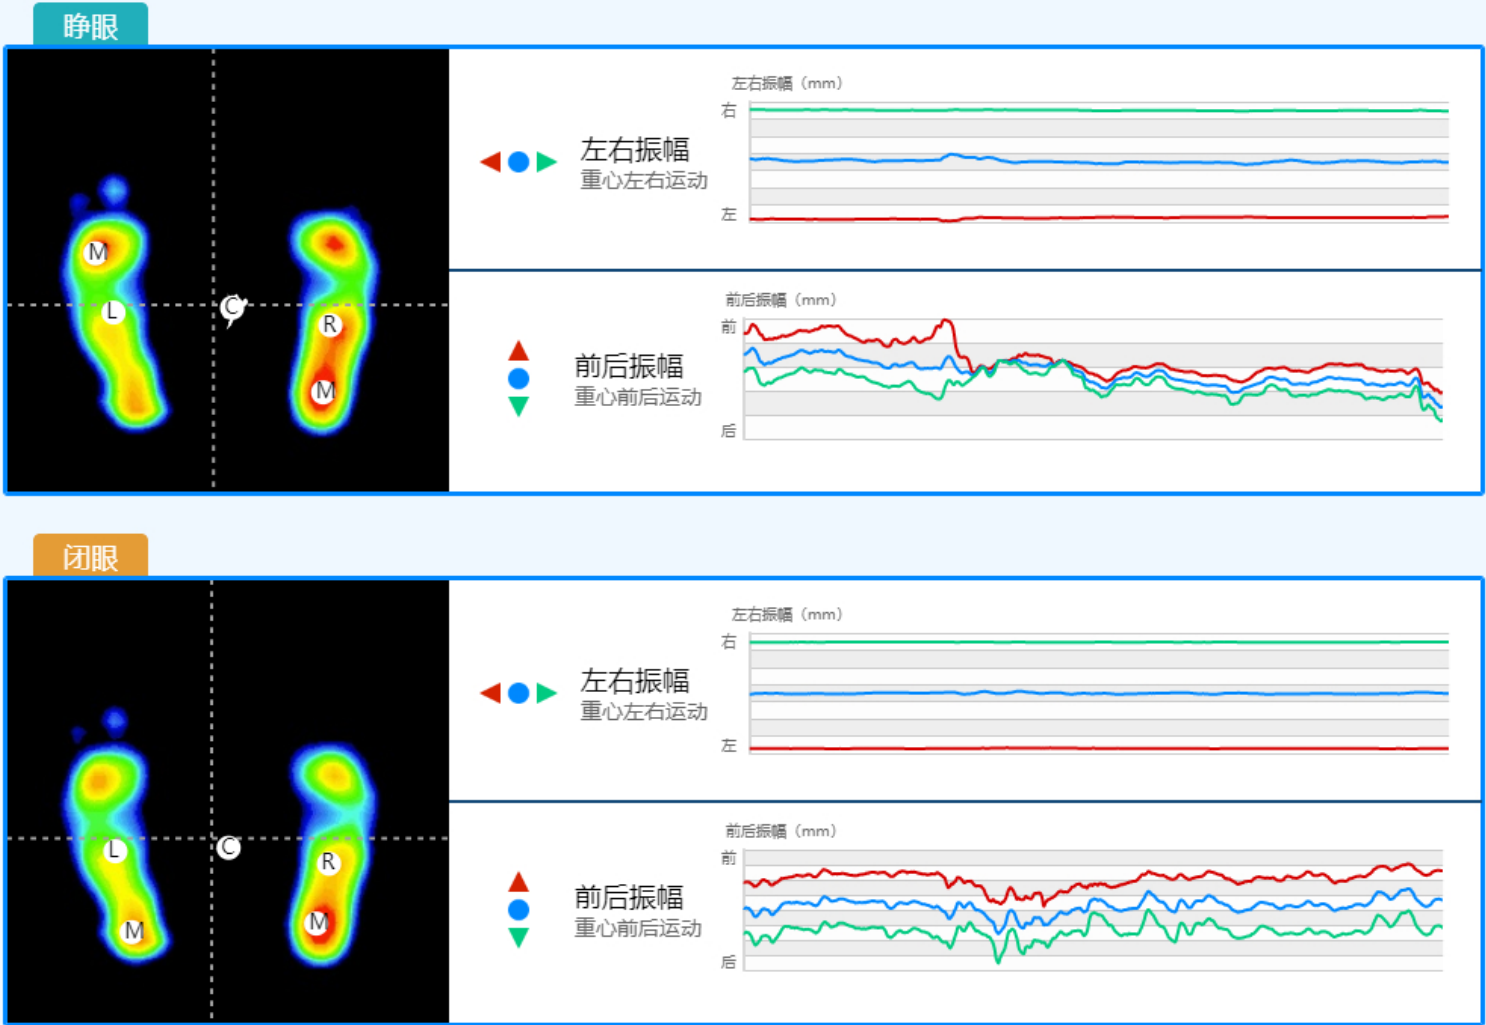

Cop数据

|             | 睁眼     | 闭眼     |
|-------------|--------|--------|
| 平均位置X【mm】   | 16.13  | 14.60  |
| 平均位置Y【mm】   | -2.53  | -8.28  |
| 标准差X【mm】    | 3.07   | 1.02   |
| 标准差Y【mm】    | 5.08   | 1.49   |
| 距离【mm】      | 201.85 | 129.19 |
| 平均速度【mm/ms】 | 0.01   | 0.00   |
| 距离/表面积      | 0.81   | 3.83   |
| 偏心率         | 0.86   | 0.63   |
| 倾斜角度【°】     | -53.03 | -25.99 |

# 平衡报告

罗桃红 20岁 女 53.0kg 158.0cm 2025-2-26 13:40:55

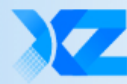

## 报告结论

睁眼  
前后振幅大于参考值  
前后晃动比左右晃动更明显  
闭眼  
前后晃动比左右晃动更明显
