# Supplementary material for: Individualized Corrective Training Based on Precision Biomechanical Assessment for the Prevention of Sports Injuries in Adolescents
Source: Research Square preprint supplement (doi:10.21203/rs.3.rs-8426574/v1), 2026-02-02
Supplement: Supplementary file 203 [file 平衡报告-罗桃红-20250226134330.pdf › Plantar pressure and gait analysis/soccer/平衡报告-罗桃红-20250226134330.pdf]

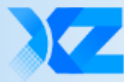

双脚重心变化

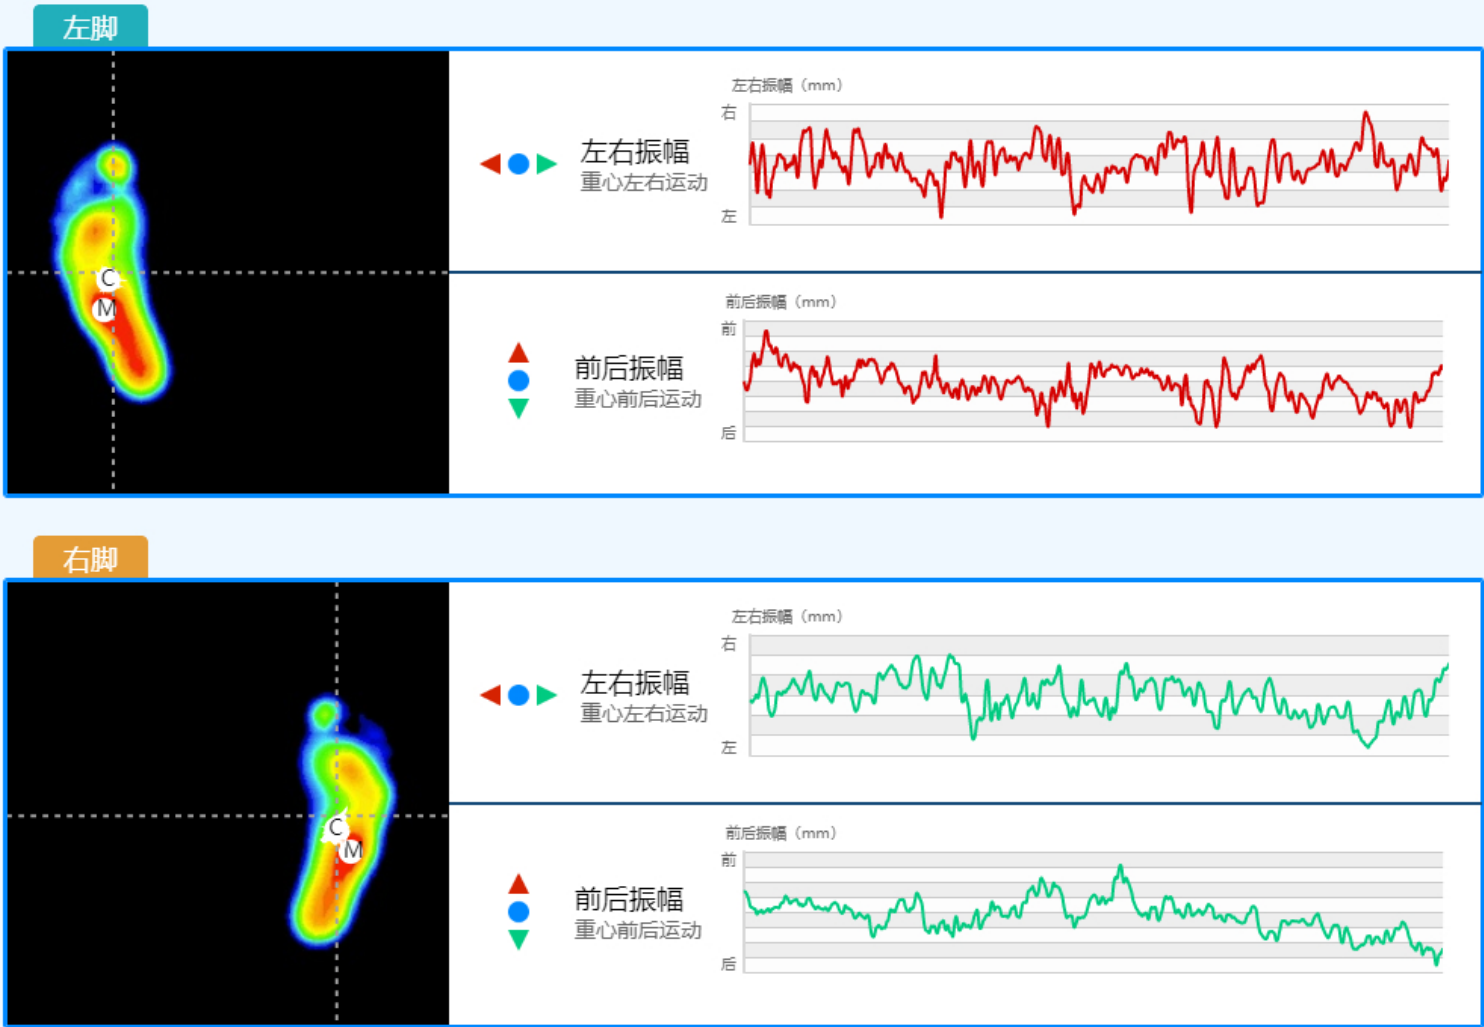

Cop数据

左脚 右脚

|             | 左脚     | 右脚     |
|-------------|--------|--------|
| 平均位置X【mm】   | -4.48  | -0.55  |
| 平均位置Y【mm】   | -6.76  | -11.43 |
| 标准差X【mm】    | 3.10   | 4.45   |
| 标准差Y【mm】    | 3.30   | 5.47   |
| 距离【mm】      | 784.03 | 766.55 |
| 平均速度【mm/ms】 | 0.03   | 0.03   |
| 距离/表面积      | 3.48   | 1.47   |
| 偏心率         | 0.65   | 0.78   |
| 倾斜角度【°】     | -20.10 | -72.63 |

# 平衡报告

罗桃红 20岁 女 53.0kg 158.0cm 2025-2-26 13:42:21

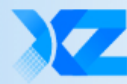

## 报告结论

睁眼  
前后振幅大于参考值  
前后晃动比左右晃动更明显
