# Supplementary material for: Individualized Corrective Training Based on Precision Biomechanical Assessment for the Prevention of Sports Injuries in Adolescents
Source: Research Square preprint supplement (doi:10.21203/rs.3.rs-8426574/v1), 2026-02-02
Supplement: Supplementary file 204 [file 平衡报告-袁欣羽-20250226115748.pdf › Plantar pressure and gait analysis/soccer/平衡报告-袁欣羽-20250226115748.pdf]

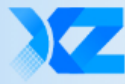

双脚重心变化

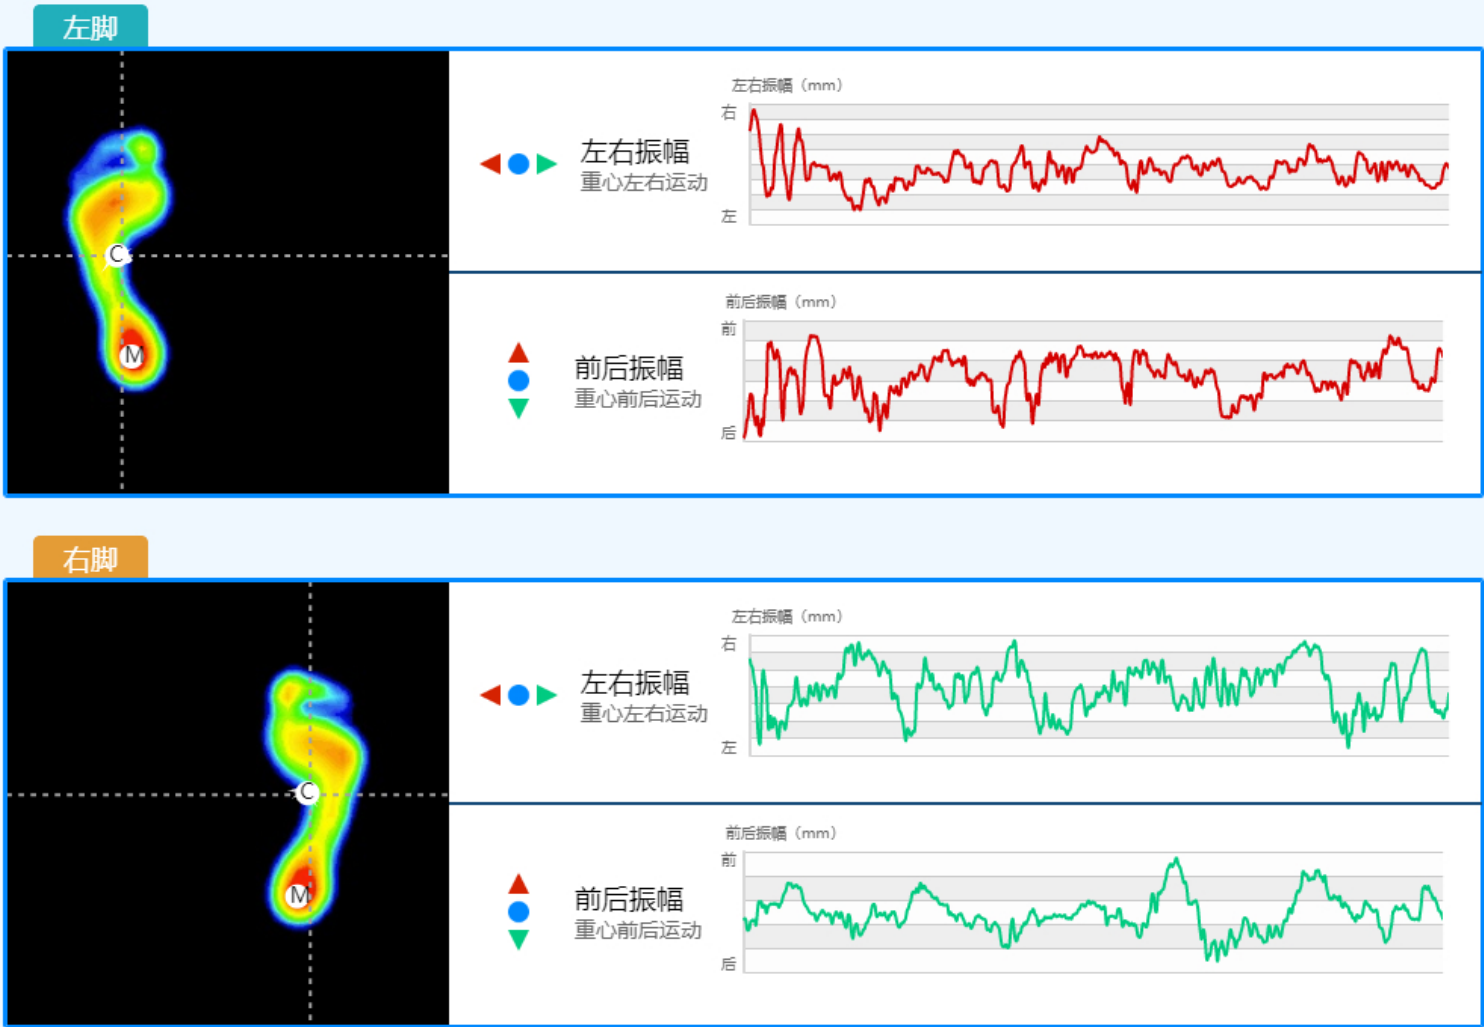

Cop数据

左脚 右脚

|             | 左脚     | 右脚     |
|-------------|--------|--------|
| 平均位置X【mm】   | -4.32  | -2.20  |
| 平均位置Y【mm】   | 0.38   | 1.35   |
| 标准差X【mm】    | 3.06   | 2.73   |
| 标准差Y【mm】    | 2.05   | 2.26   |
| 距离【mm】      | 508.30 | 460.04 |
| 平均速度【mm/ms】 | 0.02   | 0.02   |
| 距离/表面积      | 3.19   | 4.01   |
| 偏心率         | 0.86   | 0.58   |
| 倾斜角度【°】     | -88.88 | -61.67 |

平衡报告

袁欣羽 19岁 女 50.0kg 162.0cm 2025-2-26 11:51:56

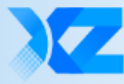

报告结论

睁眼  
左右晃动比前后晃动更明显
