# Supplementary material for: Individualized Corrective Training Based on Precision Biomechanical Assessment for the Prevention of Sports Injuries in Adolescents
Source: Research Square preprint supplement (doi:10.21203/rs.3.rs-8426574/v1), 2026-02-02
Supplement: Supplementary file 206 [file 平衡报告-赵亮-20250226120050.pdf › Plantar pressure and gait analysis/soccer/平衡报告-赵亮-20250226120050.pdf]

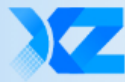

双脚重心变化

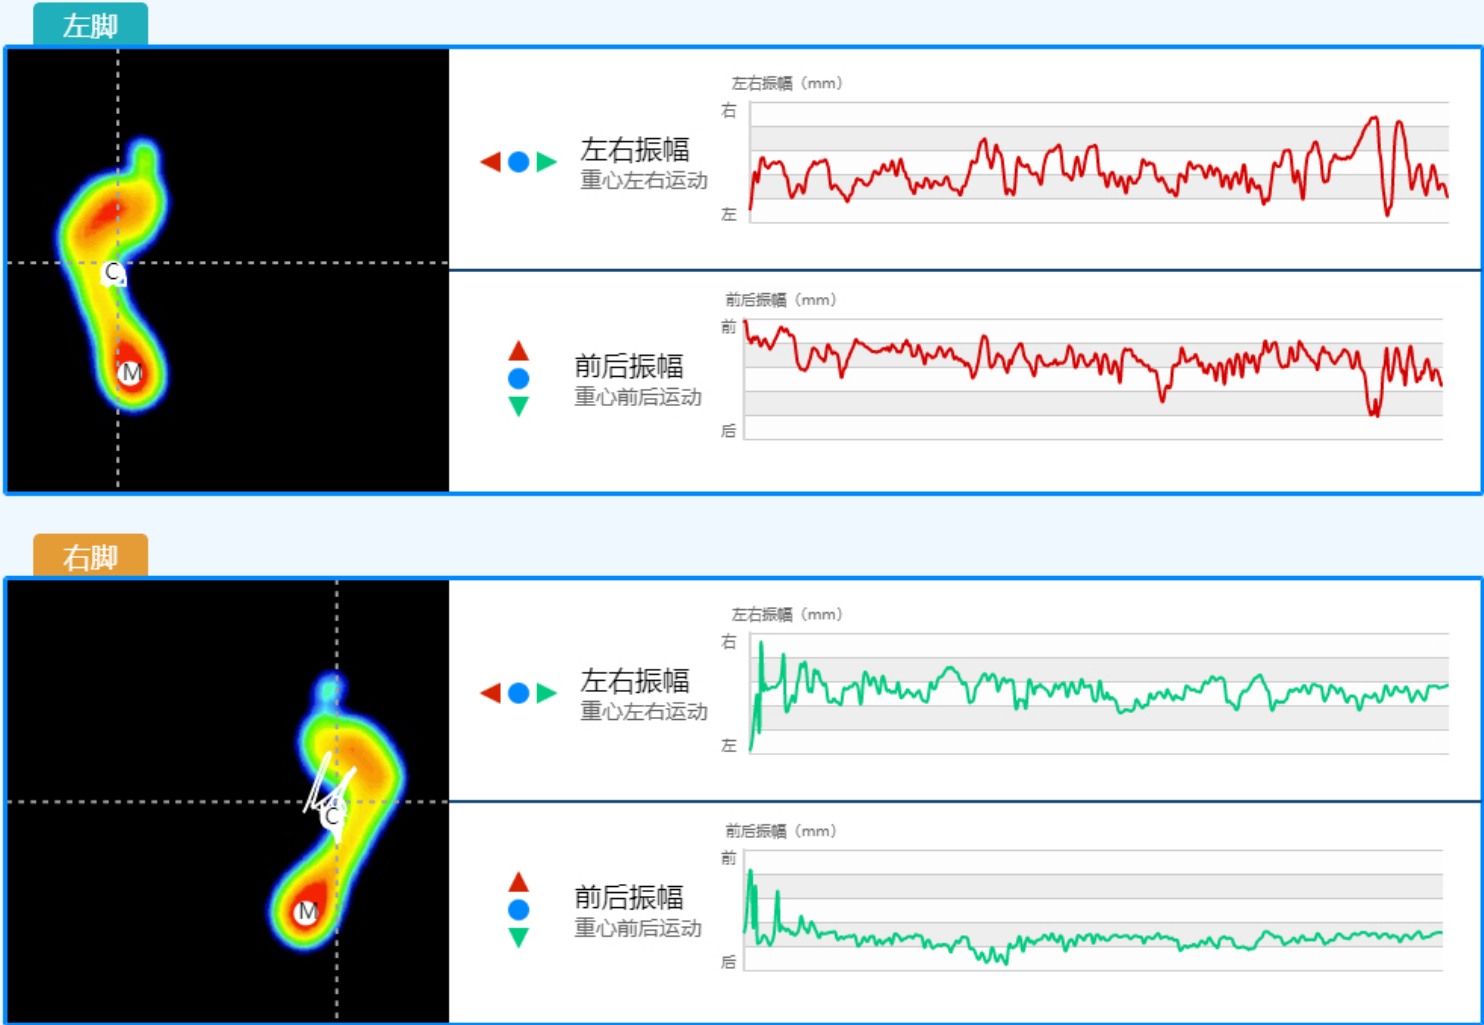

Cop数据

左脚 右脚

|             | 左脚     | 右脚      |
|-------------|--------|---------|
| 平均位置X【mm】   | -4.53  | -4.07   |
| 平均位置Y【mm】   | -8.51  | -13.96  |
| 标准差X【mm】    | 3.54   | 4.56    |
| 标准差Y【mm】    | 2.89   | 7.49    |
| 距离【mm】      | 628.84 | 1255.00 |
| 平均速度【mm/ms】 | 0.02   | 0.04    |
| 距离/表面积      | 1.97   | 0.59    |
| 偏心率         | 0.29   | 0.84    |
| 倾斜角度【°】     | -86.00 | -68.70  |

# 平衡报告

赵亮 22岁 男 83.0kg 179.0cm 2025-2-26 11:40:46

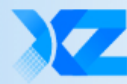

## 报告结论

睁眼  
前后振幅大于参考值  
前后晃动比左右晃动更明显
