# Supplementary material for: Individualized Corrective Training Based on Precision Biomechanical Assessment for the Prevention of Sports Injuries in Adolescents
Source: Research Square preprint supplement (doi:10.21203/rs.3.rs-8426574/v1), 2026-02-02
Supplement: Supplementary file 207 [file 平衡报告-赵亮-20250226120102.pdf › Plantar pressure and gait analysis/soccer/平衡报告-赵亮-20250226120102.pdf]

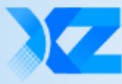

双脚重心变化

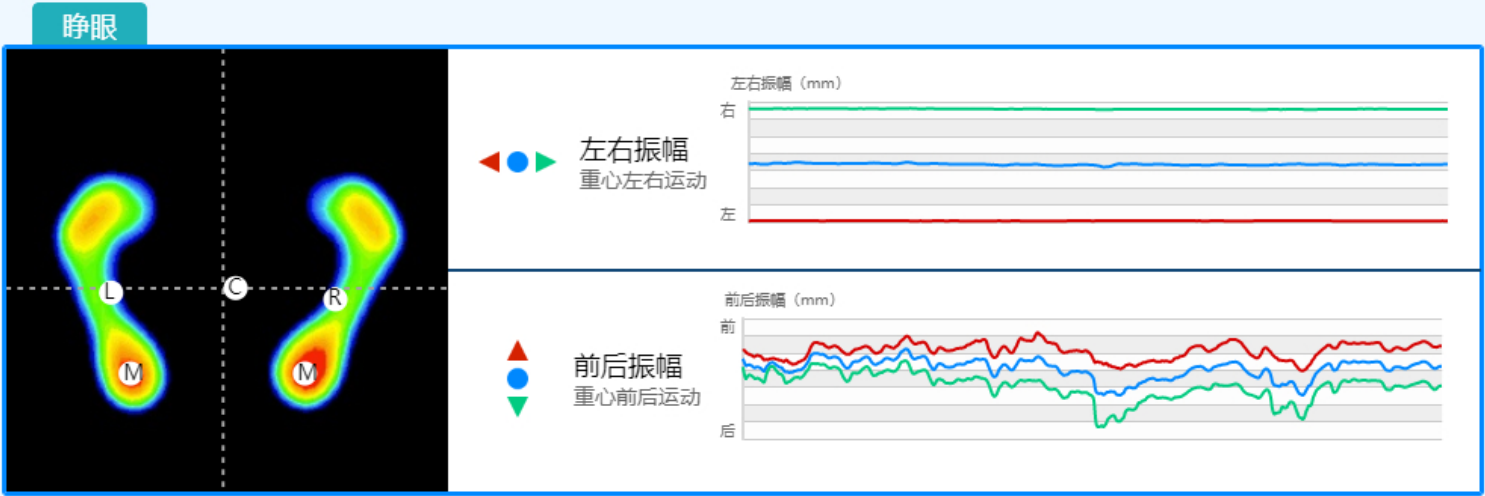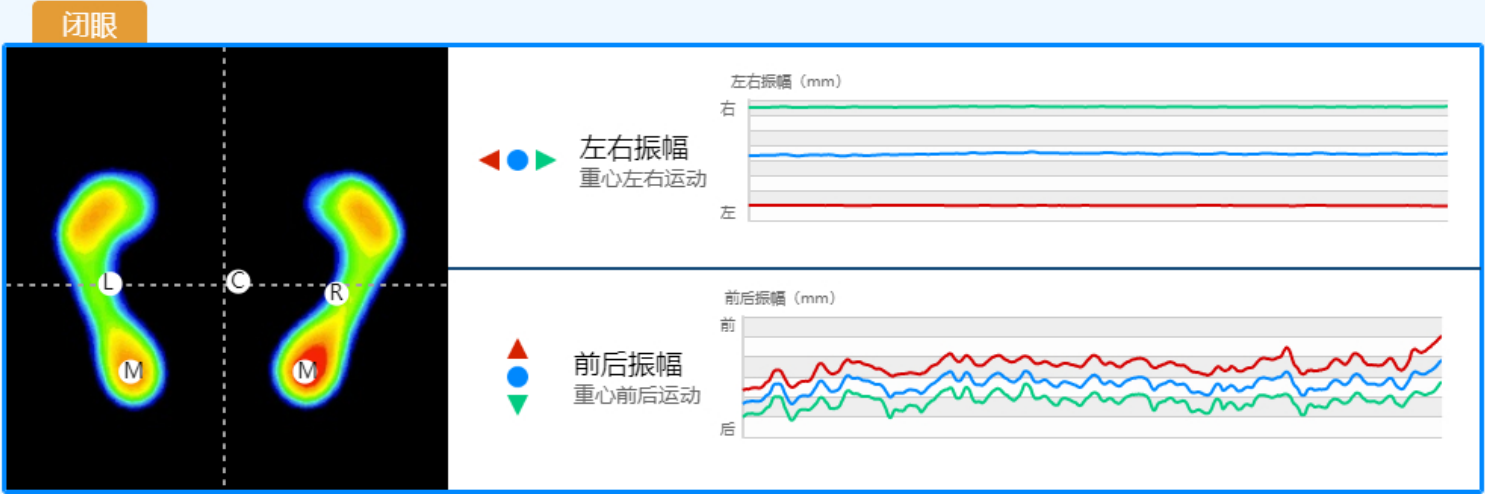

Cop数据

|             | 睁眼     | 闭眼     |
|-------------|--------|--------|
| 平均位置X【mm】   | 10.81  | 12.29  |
| 平均位置Y【mm】   | 0.21   | 3.19   |
| 标准差X【mm】    | 1.39   | 1.65   |
| 标准差Y【mm】    | 1.72   | 1.87   |
| 距离【mm】      | 117.32 | 154.92 |
| 平均速度【mm/ms】 | 0.00   | 0.01   |
| 距离/表面积      | 2.47   | 3.06   |
| 偏心率         | 0.85   | 0.87   |
| 倾斜角度【°】     | -54.19 | -47.04 |

平衡报告

赵亮 22岁 男 83.0kg 179.0cm 2025-2-26 11:39:30

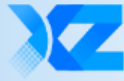

报告结论

睁眼  
前后晃动比左右晃动更明显  
闭眼  
前后晃动比左右晃动更明显
