# Supplementary material for: Individualized Corrective Training Based on Precision Biomechanical Assessment for the Prevention of Sports Injuries in Adolescents
Source: Research Square preprint supplement (doi:10.21203/rs.3.rs-8426574/v1), 2026-02-02
Supplement: Supplementary file 208 [file 平衡报告-赵院林-20250226112158.pdf › Plantar pressure and gait analysis/soccer/平衡报告-赵院林-20250226112158.pdf]

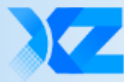

双脚重心变化

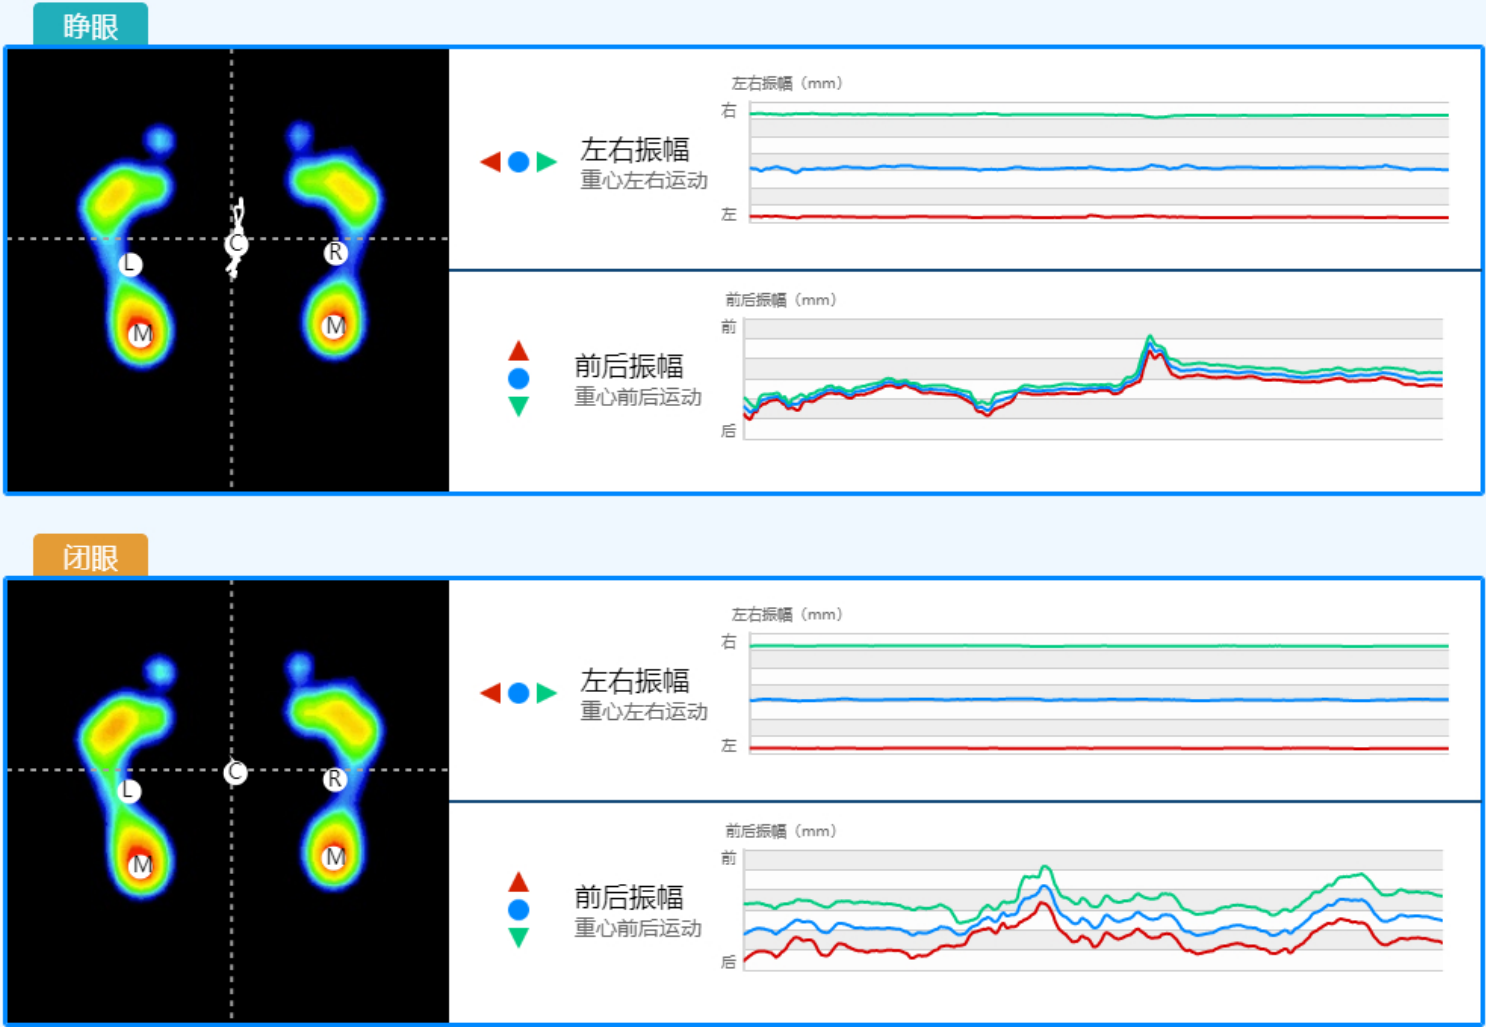

Cop数据

|             | 睁眼     | 闭眼     |
|-------------|--------|--------|
| 平均位置X【mm】   | 4.22   | 3.52   |
| 平均位置Y【mm】   | -5.31  | -2.88  |
| 标准差X【mm】    | 2.04   | 0.82   |
| 标准差Y【mm】    | 12.47  | 2.65   |
| 距离【mm】      | 317.52 | 109.39 |
| 平均速度【mm/ms】 | 0.01   | 0.00   |
| 距离/表面积      | 0.61   | 2.85   |
| 偏心率         | 0.99   | 0.95   |
| 倾斜角度【°】     | -82.84 | -88.90 |

# 平衡报告

赵院林 22岁 女 59.0kg 158.0cm 2025-2-26 11:20:53

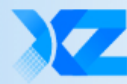

## 报告结论

睁眼  
前后振幅大于参考值  
前后晃动比左右晃动更明显  
闭眼  
前后晃动比左右晃动更明显
