# Supplementary material for: Individualized Corrective Training Based on Precision Biomechanical Assessment for the Prevention of Sports Injuries in Adolescents
Source: Research Square preprint supplement (doi:10.21203/rs.3.rs-8426574/v1), 2026-02-02
Supplement: Supplementary file 209 [file 平衡报告-赵院林-20250226112312.pdf › Plantar pressure and gait analysis/soccer/平衡报告-赵院林-20250226112312.pdf]

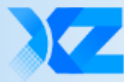

双脚重心变化

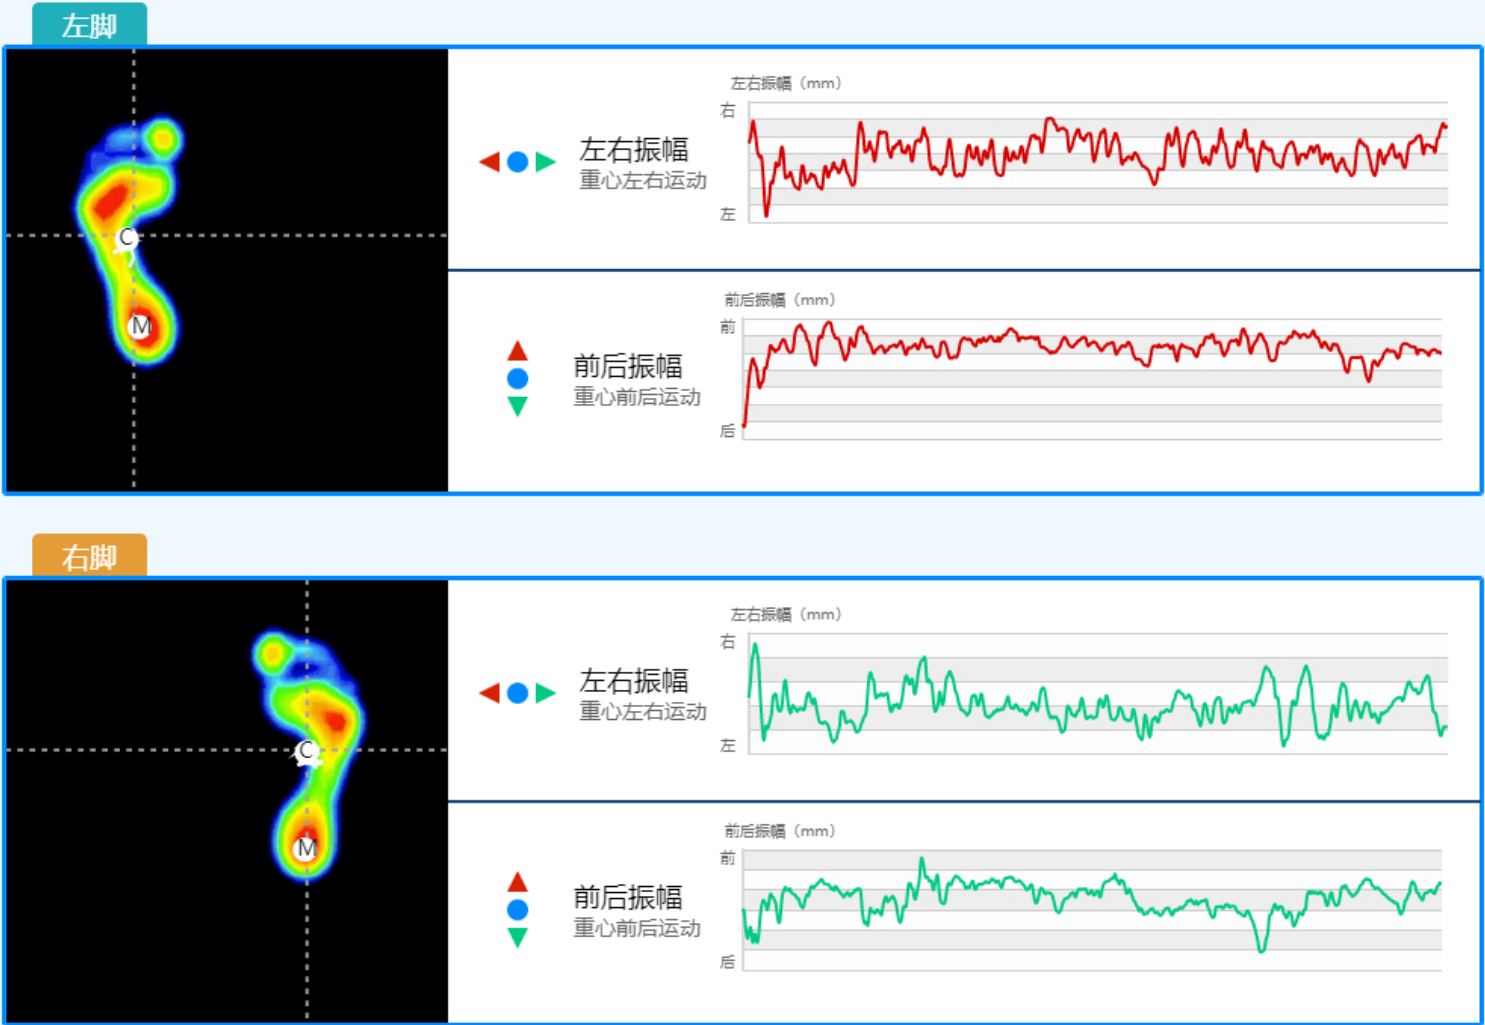

Cop数据

— 左脚    — 右脚

|             | 左脚     | 右脚     |
|-------------|--------|--------|
| 平均位置X【mm】   | -6.13  | -0.14  |
| 平均位置Y【mm】   | -3.37  | -2.14  |
| 标准差X【mm】    | 2.78   | 3.57   |
| 标准差Y【mm】    | 3.46   | 3.66   |
| 距离【mm】      | 587.54 | 622.40 |
| 平均速度【mm/ms】 | 0.02   | 0.02   |
| 距离/表面积      | 1.57   | 1.67   |
| 偏心率         | 0.78   | 0.53   |
| 倾斜角度【°】     | -71.75 | -13.45 |

# 平衡报告

赵院林 22岁 女 59.0kg 158.0cm 2025-2-26 11:22:06

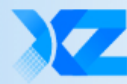

## 报告结论

睁眼  
前后晃动比左右晃动更明显
