# Supplementary material for: Individualized Corrective Training Based on Precision Biomechanical Assessment for the Prevention of Sports Injuries in Adolescents
Source: Research Square preprint supplement (doi:10.21203/rs.3.rs-8426574/v1), 2026-02-02
Supplement: Supplementary file 210 [file 平衡报告-陈明慧-20250226132543.pdf › Plantar pressure and gait analysis/soccer/平衡报告-陈明慧-20250226132543.pdf]

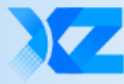

双脚重心变化

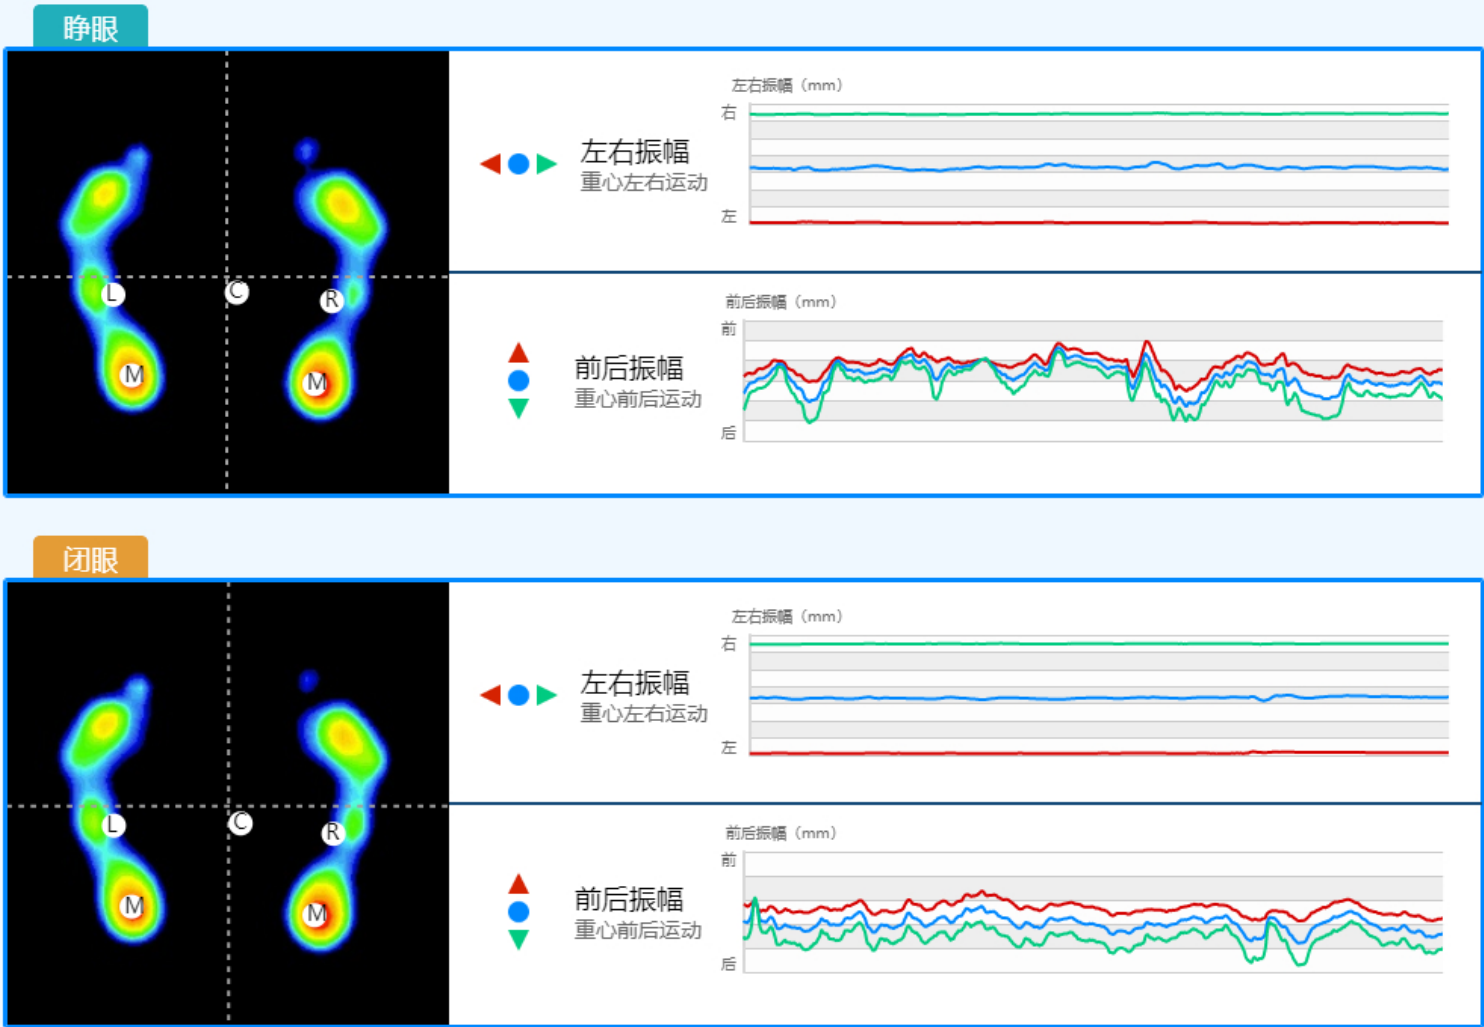

Cop数据

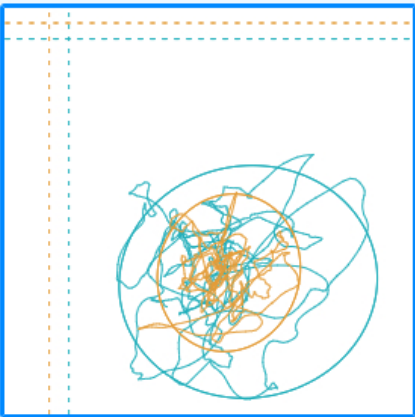

— 睁眼 — 闭眼

|             | 睁眼     | 闭眼     |
|-------------|--------|--------|
| 平均位置X【mm】   | 8.71   | 10.35  |
| 平均位置Y【mm】   | -13.72 | -14.97 |
| 标准差X【mm】    | 2.71   | 1.64   |
| 标准差Y【mm】    | 3.13   | 1.52   |
| 距离【mm】      | 256.34 | 155.38 |
| 平均速度【mm/ms】 | 0.01   | 0.01   |
| 距离/表面积      | 1.55   | 2.51   |
| 偏心率         | 0.43   | 0.46   |
| 倾斜角度【°】     | -8.99  | -73.44 |

# 平衡报告

陈明慧 18岁 女 70.0kg 175.0cm 2025-2-26 13:24:35

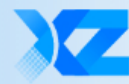

## 报告结论

睁眼  
前后晃动比左右晃动更明显  
闭眼  
身体重心位于右后方，骨盆右旋  
左右晃动比前后晃动更明显
