# Supplementary material for: Individualized Corrective Training Based on Precision Biomechanical Assessment for the Prevention of Sports Injuries in Adolescents
Source: Research Square preprint supplement (doi:10.21203/rs.3.rs-8426574/v1), 2026-02-02
Supplement: Supplementary file 211 [file 平衡报告-陈明慧-20250226132704.pdf › Plantar pressure and gait analysis/soccer/平衡报告-陈明慧-20250226132704.pdf]

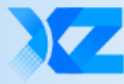

双脚重心变化

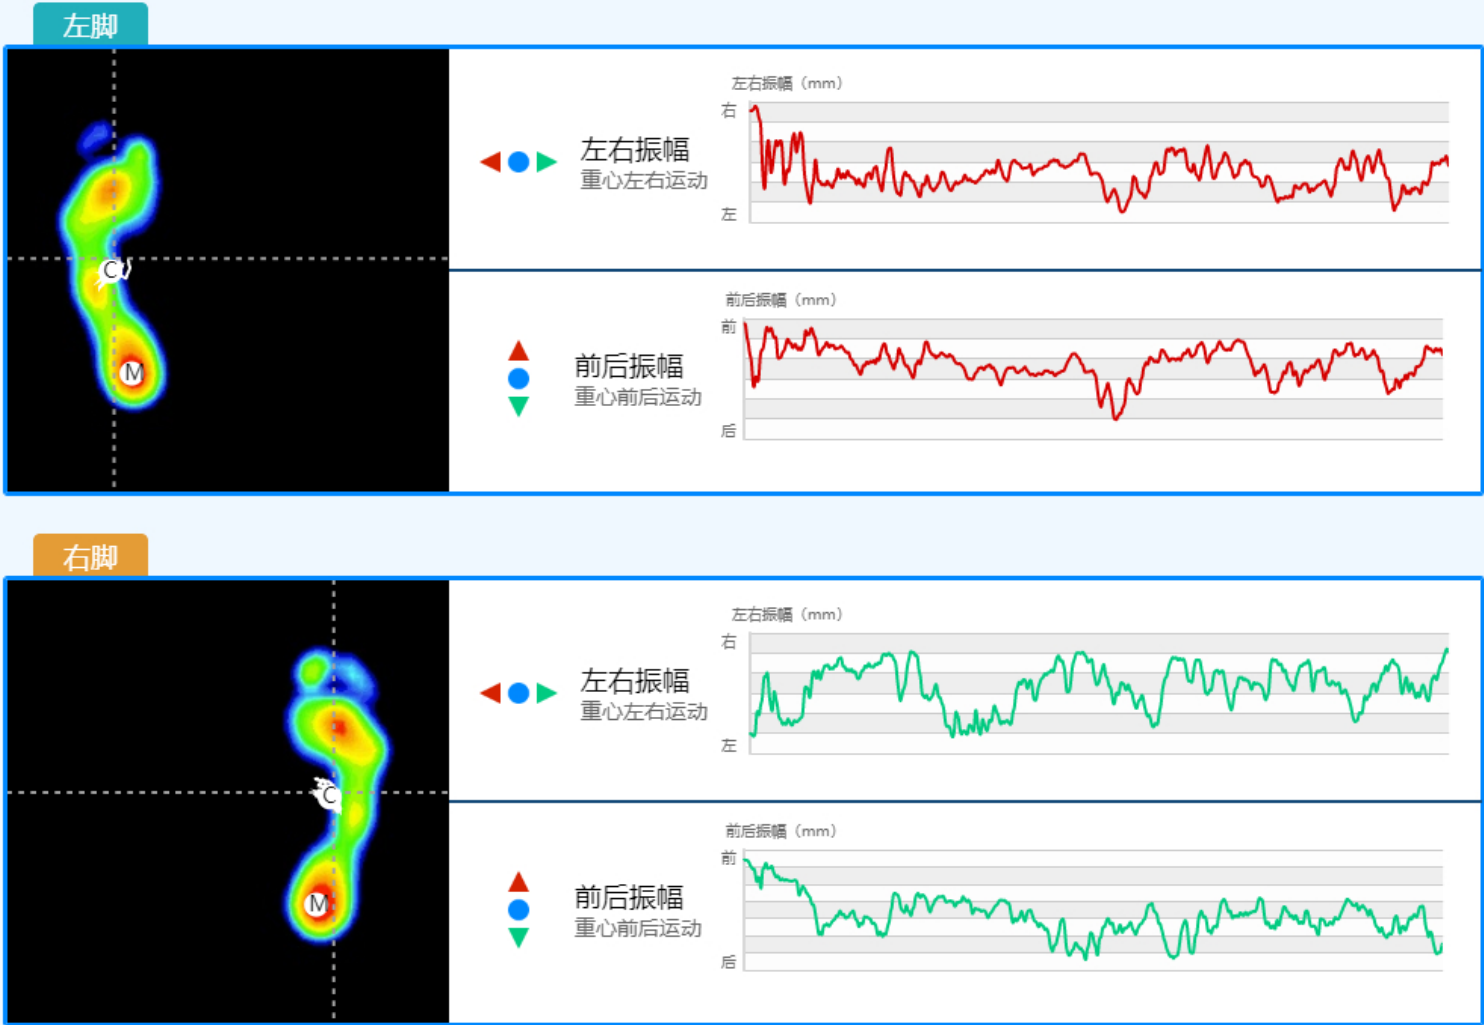

Cop数据

左脚 右脚

|             | 左脚     | 右脚     |
|-------------|--------|--------|
| 平均位置X【mm】   | -2.97  | -3.35  |
| 平均位置Y【mm】   | -11.14 | -4.38  |
| 标准差X【mm】    | 4.15   | 5.42   |
| 标准差Y【mm】    | 3.97   | 5.57   |
| 距离【mm】      | 647.30 | 734.72 |
| 平均速度【mm/ms】 | 0.02   | 0.02   |
| 距离/表面积      | 1.35   | 1.68   |
| 偏心率         | 0.61   | 0.86   |
| 倾斜角度【°】     | -4.61  | -53.34 |

# 平衡报告

陈明慧 18岁 女 70.0kg 175.0cm 2025-2-26 13:25:55

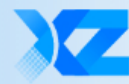

## 报告结论

睁眼  
左右振幅大于参考值  
前后振幅大于参考值  
前后晃动比左右晃动更明显
