# Supplementary material for: Individualized Corrective Training Based on Precision Biomechanical Assessment for the Prevention of Sports Injuries in Adolescents
Source: Research Square preprint supplement (doi:10.21203/rs.3.rs-8426574/v1), 2026-02-02
Supplement: Supplementary file 213 [file 平衡报告-韩雨坪-20250226144958.pdf › Plantar pressure and gait analysis/soccer/平衡报告-韩雨坪-20250226144958.pdf]

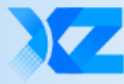

双脚重心变化

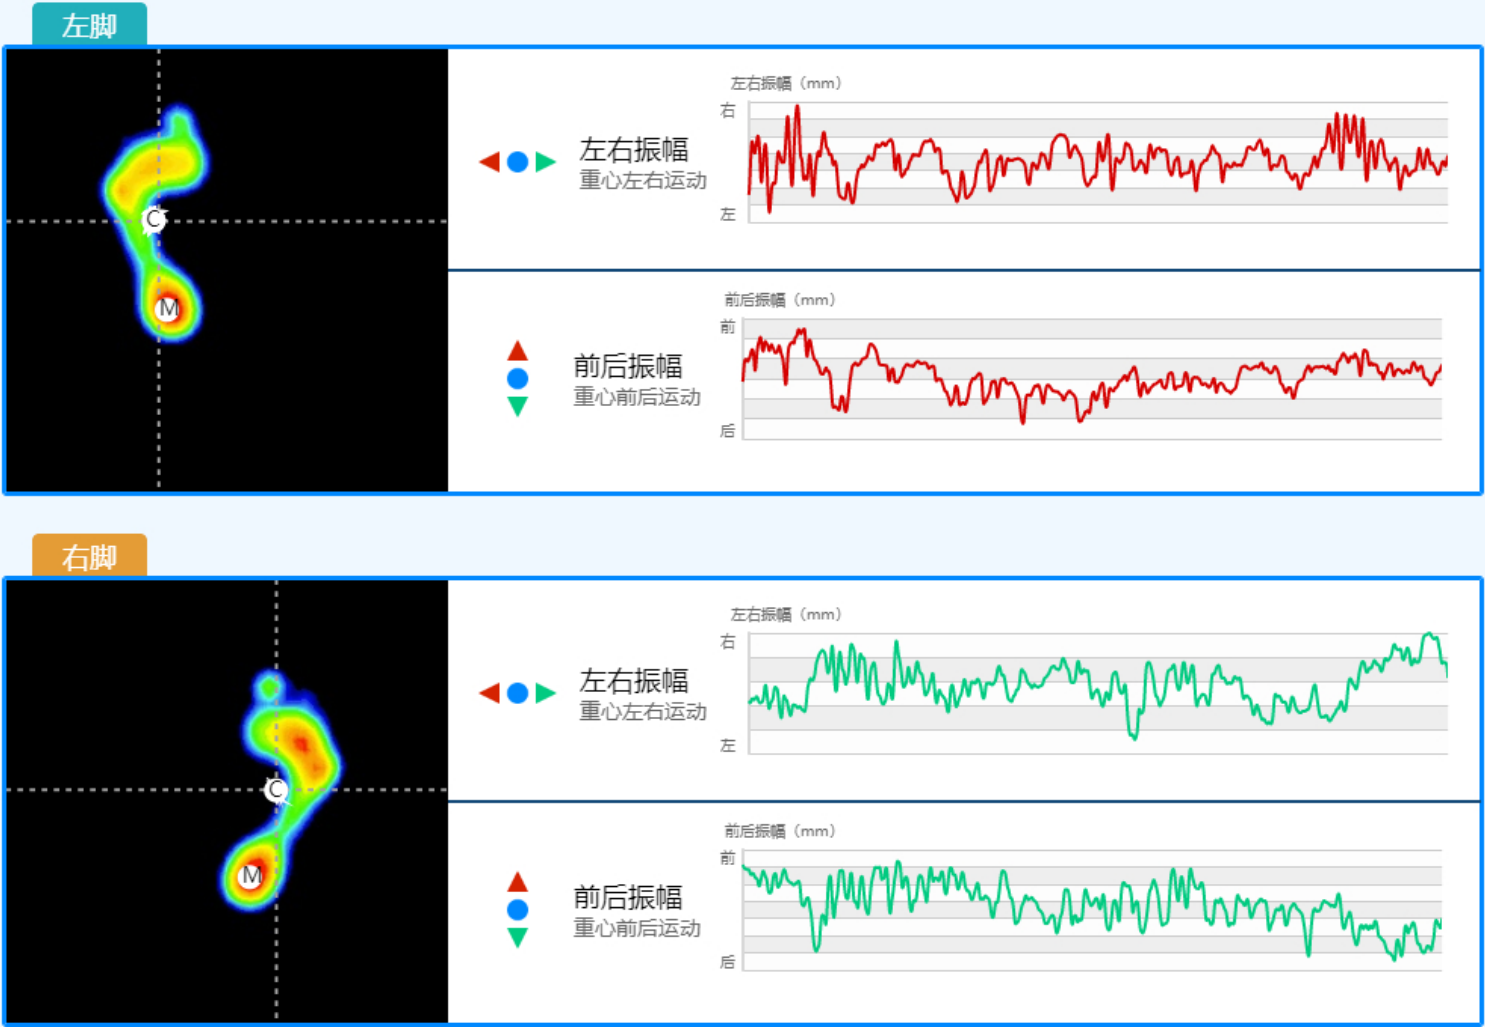

Cop数据

左脚 右脚

|             | 左脚     | 右脚     |
|-------------|--------|--------|
| 平均位置X【mm】   | -4.37  | -0.42  |
| 平均位置Y【mm】   | 0.52   | -0.49  |
| 标准差X【mm】    | 2.91   | 2.54   |
| 标准差Y【mm】    | 4.25   | 3.79   |
| 距离【mm】      | 714.21 | 580.82 |
| 平均速度【mm/ms】 | 0.02   | 0.02   |
| 距离/表面积      | 2.23   | 4.14   |
| 偏心率         | 0.71   | 0.83   |
| 倾斜角度【°】     | -42.25 | -29.08 |

平衡报告

韩雨坪 20岁 女 50.0kg 158.0cm 2025-2-26 14:48:51

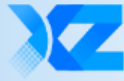

报告结论

睁眼  
前后晃动比左右晃动更明显
