# Supplementary material for: Individualized Corrective Training Based on Precision Biomechanical Assessment for the Prevention of Sports Injuries in Adolescents
Source: Research Square preprint supplement (doi:10.21203/rs.3.rs-8426574/v1), 2026-02-02
Supplement: Supplementary file 214 [file 平衡报告-魏雨虹-20250226122849.pdf › Plantar pressure and gait analysis/soccer/平衡报告-魏雨虹-20250226122849.pdf]

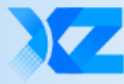

双脚重心变化

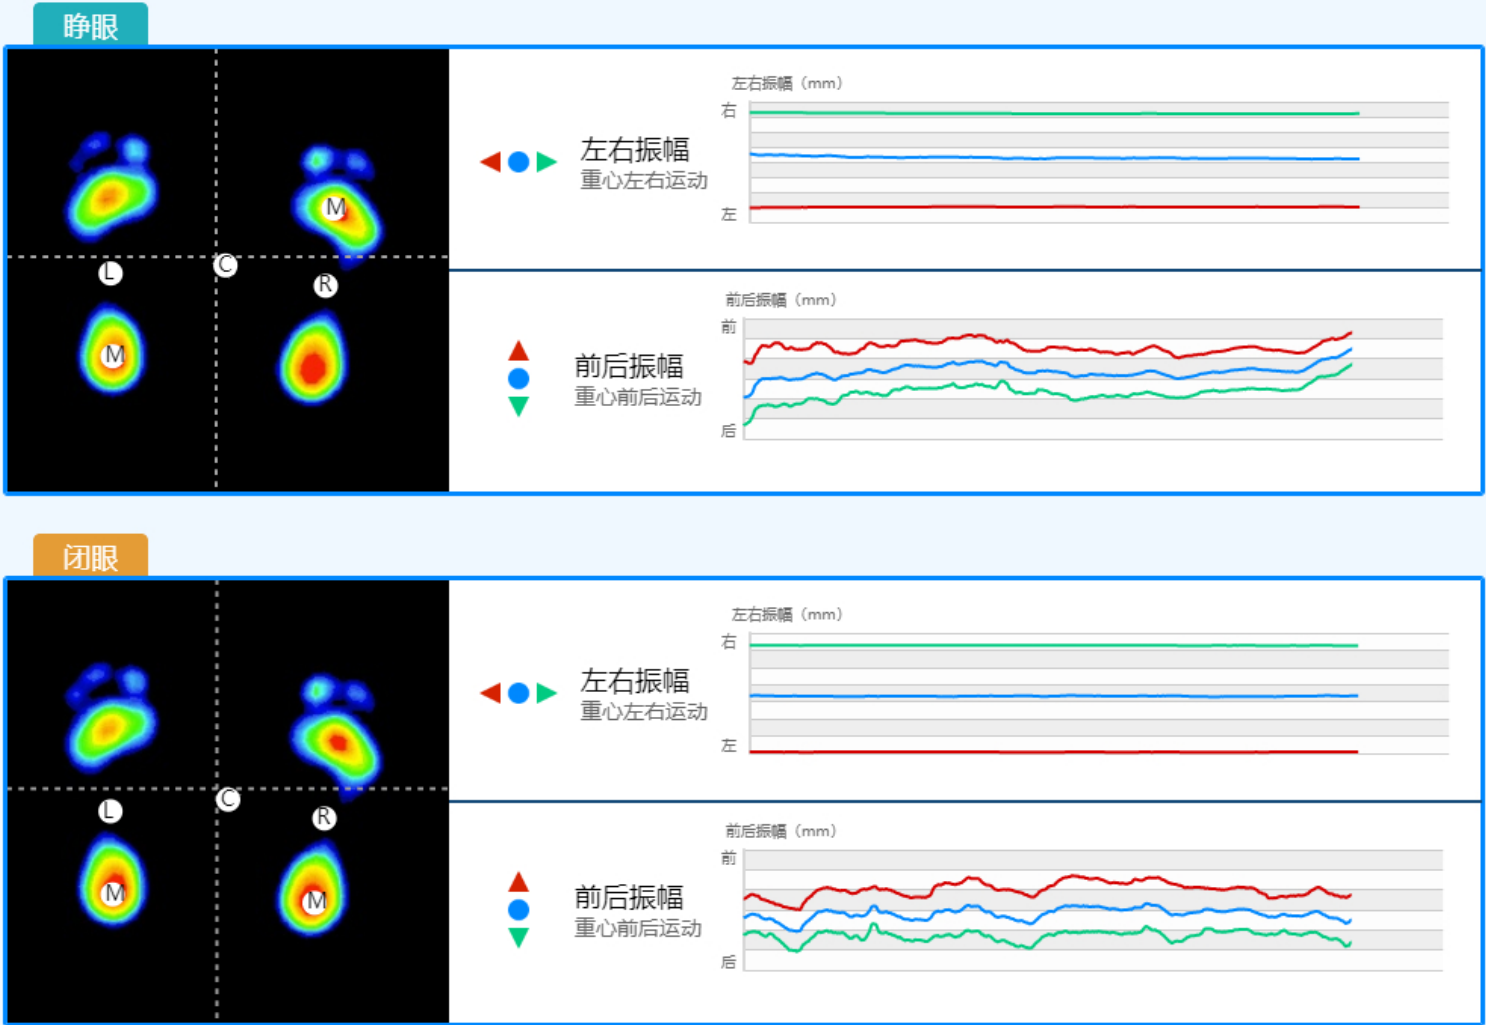

Cop数据

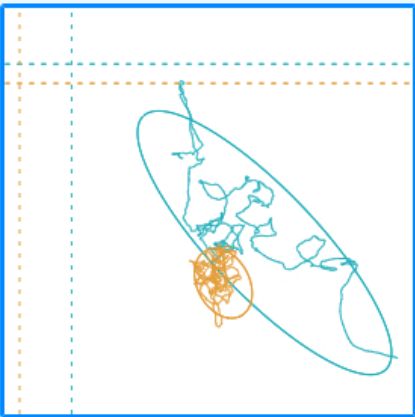

— 睁眼 — 闭眼

|             | 睁眼     | 闭眼     |
|-------------|--------|--------|
| 平均位置X【mm】   | 8.19   | 9.80   |
| 平均位置Y【mm】   | -7.53  | -9.57  |
| 标准差X【mm】    | 2.27   | 0.53   |
| 标准差Y【mm】    | 2.35   | 0.82   |
| 距离【mm】      | 83.03  | 63.18  |
| 平均速度【mm/ms】 | 0.00   | 0.00   |
| 距离/表面积      | 1.15   | 8.35   |
| 偏心率         | 0.95   | 0.71   |
| 倾斜角度【°】     | -43.54 | -27.86 |

# 平衡报告

魏雨虹 21岁 女 53.0kg 168.0cm 2025-2-26 12:27:41

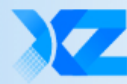

## 报告结论

睁眼  
前后晃动比左右晃动更明显  
闭眼  
前后晃动比左右晃动更明显
