# Supplementary material for: Individualized Corrective Training Based on Precision Biomechanical Assessment for the Prevention of Sports Injuries in Adolescents
Source: Research Square preprint supplement (doi:10.21203/rs.3.rs-8426574/v1), 2026-02-02
Supplement: Supplementary file 220 [file 静态报告-何长强-20250226151843.pdf › Plantar pressure and gait analysis/soccer/静态报告-何长强-20250226151843.pdf]

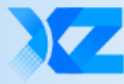

静态双脚数据

左脚

|            |      |
|------------|------|
| 面积【mm²】    | 7574 |
| 前/双足【%】    | 24   |
| 前/全足【%】    | 48   |
| 最大压强【gr/%】 | 151  |
| 平均压强【gr/%】 | 148  |

|            |      |
|------------|------|
| 面积【mm²】    | 4860 |
| 后/双足【%】    | 26   |
| 后/全足【%】    | 52   |
| 最大压强【gr/%】 | 252  |
| 平均压强【gr/%】 | 248  |

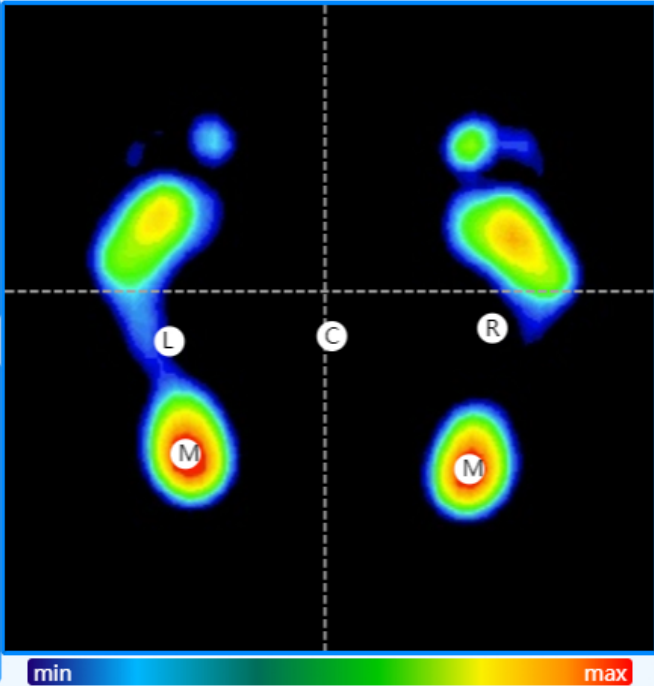

右脚

|            |      |
|------------|------|
| 面积【mm²】    | 7755 |
| 前/双足【%】    | 28   |
| 前/全足【%】    | 56   |
| 最大压强【gr/%】 | 181  |
| 平均压强【gr/%】 | 171  |

|            |      |
|------------|------|
| 面积【mm²】    | 4034 |
| 后/双足【%】    | 22   |
| 后/全足【%】    | 44   |
| 最大压强【gr/%】 | 265  |
| 平均压强【gr/%】 | 254  |

双脚综合数据

左脚总和

|            |       |
|------------|-------|
| 面积【mm²】    | 12434 |
| 负荷【%】      | 50    |
| 最大压强【gr/%】 | 190   |
| 平均压强【gr/%】 | 187   |

右脚总和

|            |       |
|------------|-------|
| 面积【mm²】    | 11789 |
| 负荷【%】      | 50    |
| 最大压强【gr/%】 | 207   |
| 平均压强【gr/%】 | 200   |

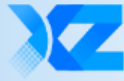

足弓类型

左脚

足弓指数 19.00%

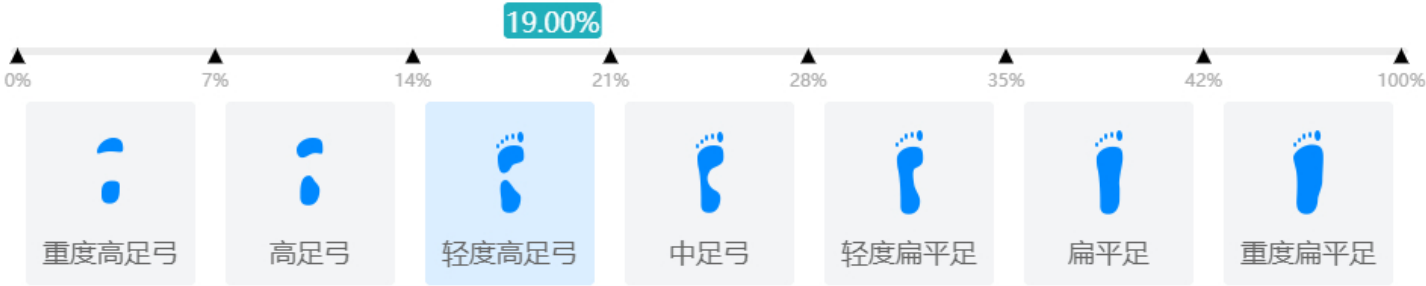

右脚

足弓指数 10.00%

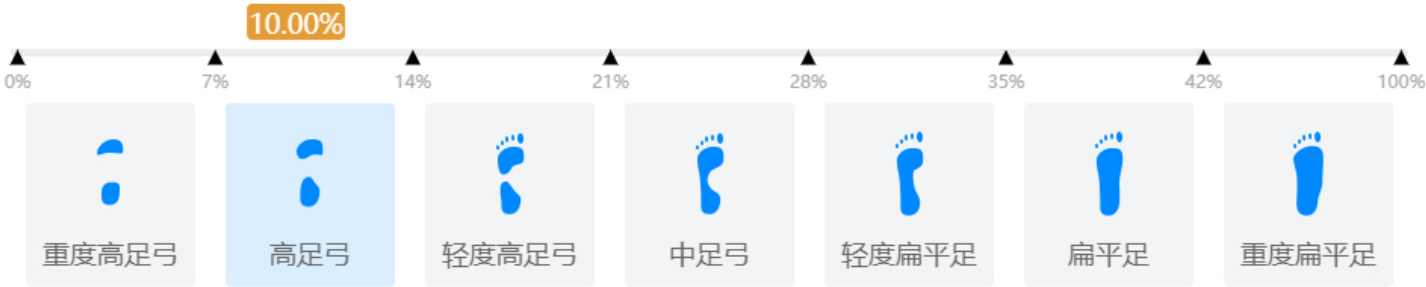

报告结论

左脚横弓塌陷  
左脚足弓偏高  
右脚横弓塌陷  
右脚足弓过高  
身体重心过度靠后  
左右侧足弓形状压力差异较大
