# Supplementary material for: Individualized Corrective Training Based on Precision Biomechanical Assessment for the Prevention of Sports Injuries in Adolescents
Source: Research Square preprint supplement (doi:10.21203/rs.3.rs-8426574/v1), 2026-02-02
Supplement: Supplementary file 221 [file 静态报告-席耘赫-20250226110649.pdf › Plantar pressure and gait analysis/soccer/静态报告-席耘赫-20250226110649.pdf]

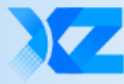

静态双脚数据

左脚

|            |      |
|------------|------|
| 面积【mm²】    | 7579 |
| 前/双足【%】    | 24   |
| 前/全足【%】    | 55   |
| 最大压强【gr/%】 | 174  |
| 平均压强【gr/%】 | 158  |

|            |      |
|------------|------|
| 面积【mm²】    | 5863 |
| 后/双足【%】    | 20   |
| 后/全足【%】    | 45   |
| 最大压强【gr/%】 | 184  |
| 平均压强【gr/%】 | 166  |

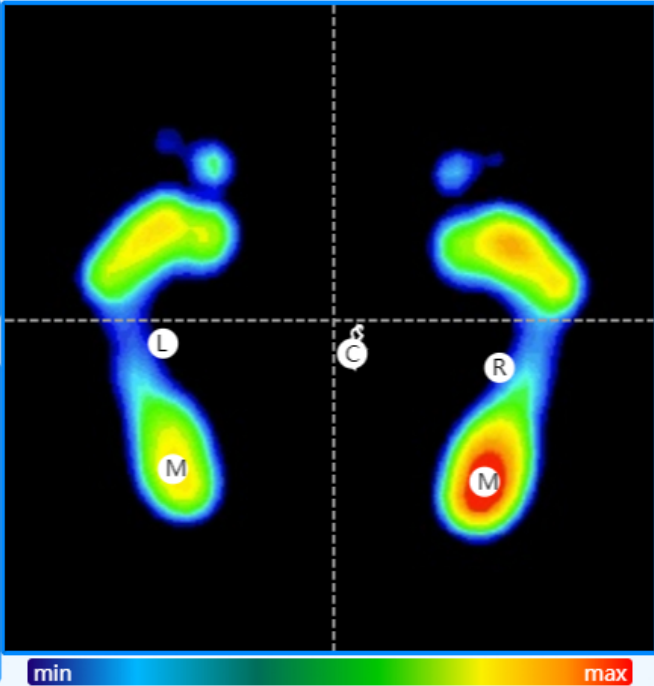

右脚

|            |      |
|------------|------|
| 面积【mm²】    | 7783 |
| 前/双足【%】    | 26   |
| 前/全足【%】    | 46   |
| 最大压强【gr/%】 | 189  |
| 平均压强【gr/%】 | 166  |

|            |      |
|------------|------|
| 面积【mm²】    | 5934 |
| 后/双足【%】    | 30   |
| 后/全足【%】    | 54   |
| 最大压强【gr/%】 | 274  |
| 平均压强【gr/%】 | 253  |

双脚综合数据

左脚总和

|            |       |
|------------|-------|
| 面积【mm²】    | 13442 |
| 负荷【%】      | 44    |
| 最大压强【gr/%】 | 167   |
| 平均压强【gr/%】 | 162   |

右脚总和

|            |       |
|------------|-------|
| 面积【mm²】    | 13717 |
| 负荷【%】      | 56    |
| 最大压强【gr/%】 | 213   |
| 平均压强【gr/%】 | 204   |

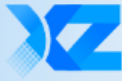

足弓类型

左脚

足弓指数 21.00%

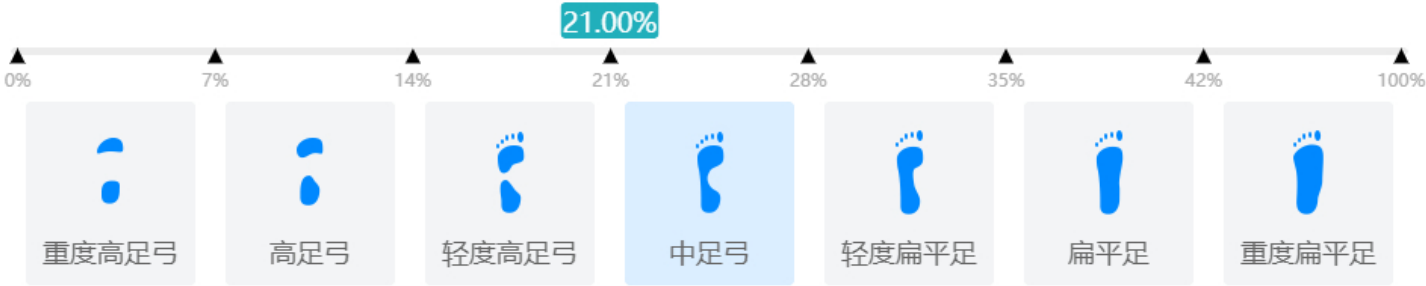

右脚

足弓指数 22.00%

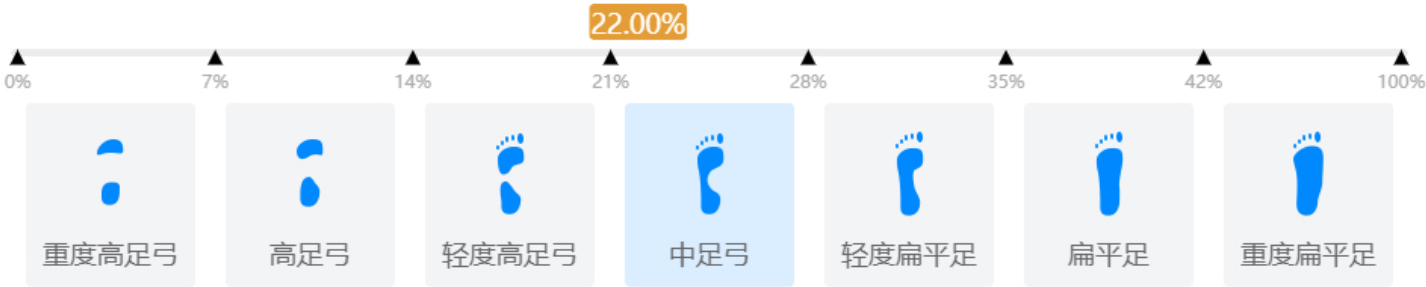

报告结论

左脚横弓塌陷  
右脚横弓塌陷  
身体重心过度靠后
