# Supplementary material for: Individualized Corrective Training Based on Precision Biomechanical Assessment for the Prevention of Sports Injuries in Adolescents
Source: Research Square preprint supplement (doi:10.21203/rs.3.rs-8426574/v1), 2026-02-02
Supplement: Supplementary file 223 [file 静态报告-张凌志-20250226103824.pdf › Plantar pressure and gait analysis/soccer/静态报告-张凌志-20250226103824.pdf]

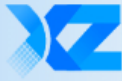

静态双脚数据

左脚

|            |      |
|------------|------|
| 面积【mm²】    | 7965 |
| 前/双足【%】    | 24   |
| 前/全足【%】    | 50   |
| 最大压强【gr/%】 | 207  |
| 平均压强【gr/%】 | 198  |

|            |      |
|------------|------|
| 面积【mm²】    | 5762 |
| 后/双足【%】    | 24   |
| 后/全足【%】    | 50   |
| 最大压强【gr/%】 | 281  |
| 平均压强【gr/%】 | 273  |

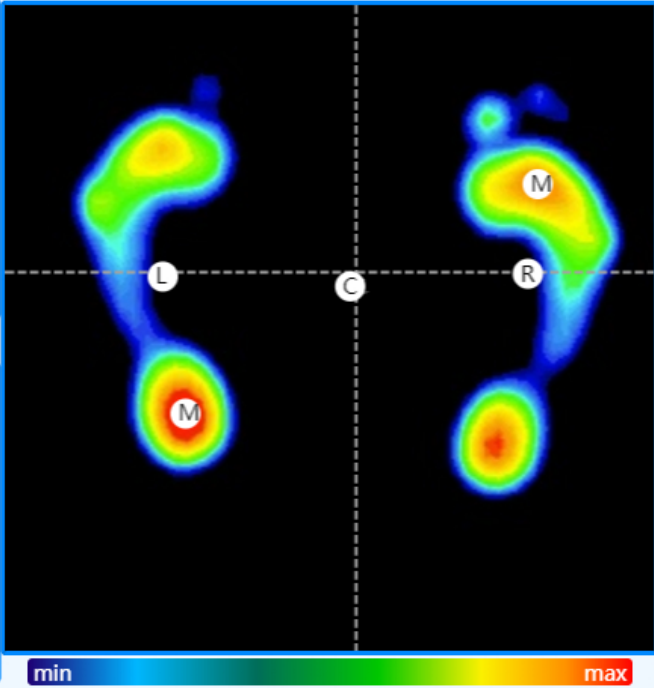

右脚

|            |      |
|------------|------|
| 面积【mm²】    | 8704 |
| 前/双足【%】    | 32   |
| 前/全足【%】    | 61   |
| 最大压强【gr/%】 | 246  |
| 平均压强【gr/%】 | 235  |

|            |      |
|------------|------|
| 面积【mm²】    | 6003 |
| 后/双足【%】    | 20   |
| 后/全足【%】    | 39   |
| 最大压强【gr/%】 | 225  |
| 平均压强【gr/%】 | 215  |

双脚综合数据

左脚总和

|            |       |
|------------|-------|
| 面积【mm²】    | 13727 |
| 负荷【%】      | 49    |
| 最大压强【gr/%】 | 232   |
| 平均压强【gr/%】 | 230   |

右脚总和

|            |       |
|------------|-------|
| 面积【mm²】    | 14707 |
| 负荷【%】      | 51    |
| 最大压强【gr/%】 | 231   |
| 平均压强【gr/%】 | 227   |

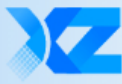

足弓类型

左脚

足弓指数 20.00%

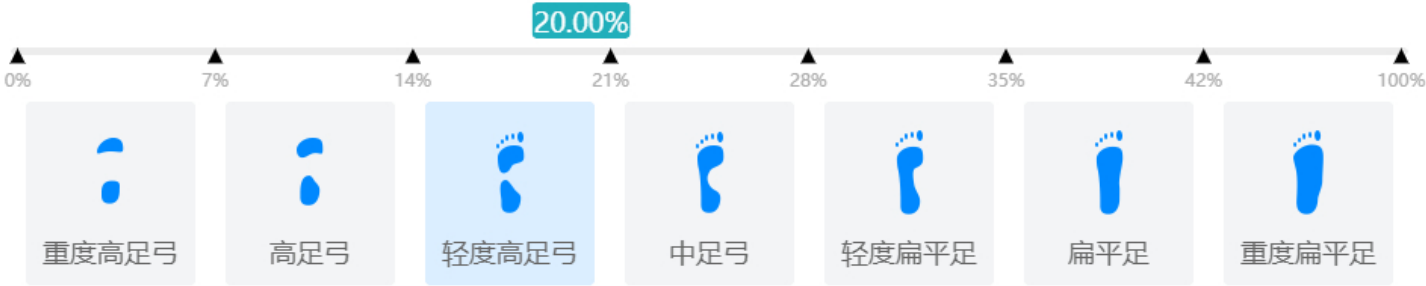

右脚

足弓指数 18.00%

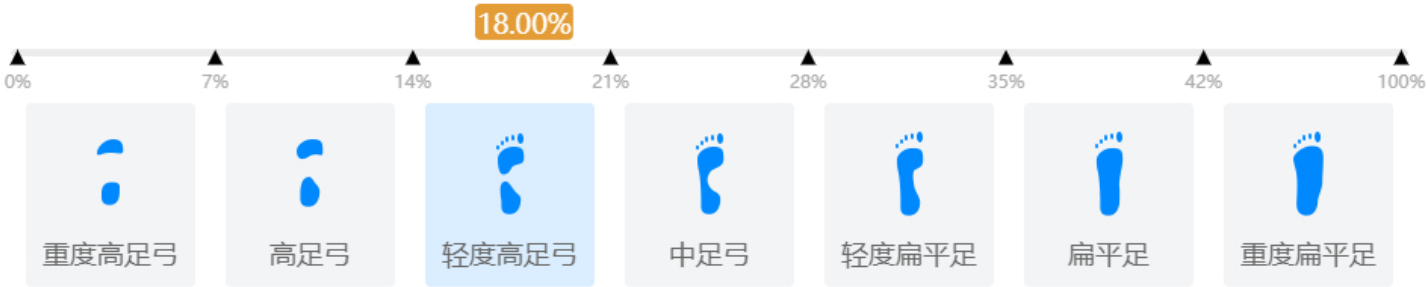

报告结论

左脚横弓塌陷  
左脚足弓偏高  
右脚横弓塌陷  
右脚足弓偏高  
身体重心过度靠后
