# Supplementary material for: Individualized Corrective Training Based on Precision Biomechanical Assessment for the Prevention of Sports Injuries in Adolescents
Source: Research Square preprint supplement (doi:10.21203/rs.3.rs-8426574/v1), 2026-02-02
Supplement: Supplementary file 224 [file 静态报告-张可云-20250226143425.pdf › Plantar pressure and gait analysis/soccer/静态报告-张可云-20250226143425.pdf]

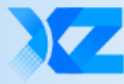

静态双脚数据

左脚

|            |      |
|------------|------|
| 面积【mm²】    | 7142 |
| 前/双足【%】    | 24   |
| 前/全足【%】    | 49   |
| 最大压强【gr/%】 | 179  |
| 平均压强【gr/%】 | 160  |

|            |      |
|------------|------|
| 面积【mm²】    | 5349 |
| 后/双足【%】    | 25   |
| 后/全足【%】    | 51   |
| 最大压强【gr/%】 | 241  |
| 平均压强【gr/%】 | 225  |

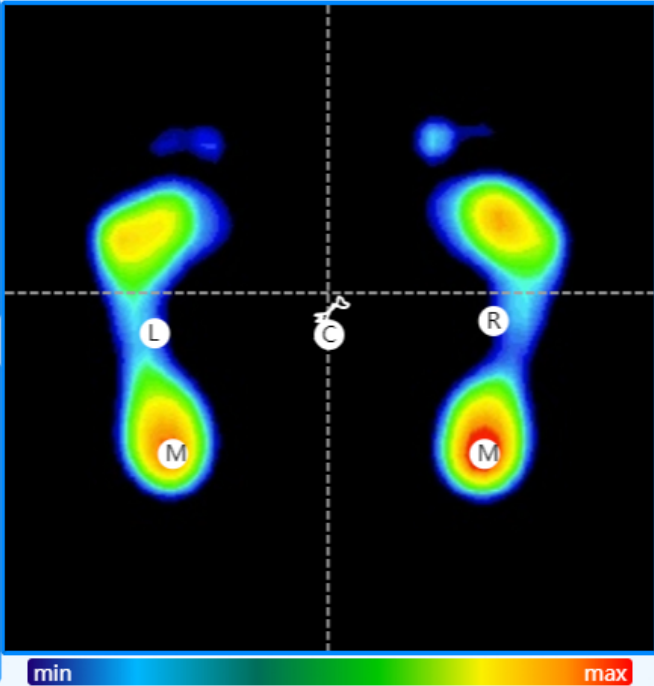

右脚

|            |      |
|------------|------|
| 面积【mm²】    | 7406 |
| 前/双足【%】    | 25   |
| 前/全足【%】    | 49   |
| 最大压强【gr/%】 | 197  |
| 平均压强【gr/%】 | 164  |

|            |      |
|------------|------|
| 面积【mm²】    | 5253 |
| 后/双足【%】    | 26   |
| 后/全足【%】    | 51   |
| 最大压强【gr/%】 | 255  |
| 平均压强【gr/%】 | 242  |

双脚综合数据

左脚总和

|            |       |
|------------|-------|
| 面积【mm²】    | 12491 |
| 负荷【%】      | 49    |
| 最大压强【gr/%】 | 195   |
| 平均压强【gr/%】 | 188   |

右脚总和

|            |       |
|------------|-------|
| 面积【mm²】    | 12659 |
| 负荷【%】      | 51    |
| 最大压强【gr/%】 | 211   |
| 平均压强【gr/%】 | 196   |

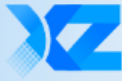

足弓类型

左脚

足弓指数 23.00%

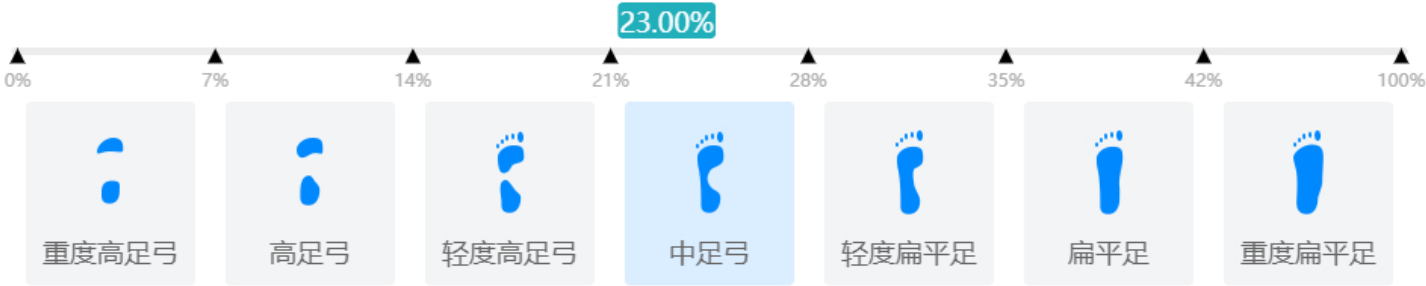

右脚

足弓指数 21.00%

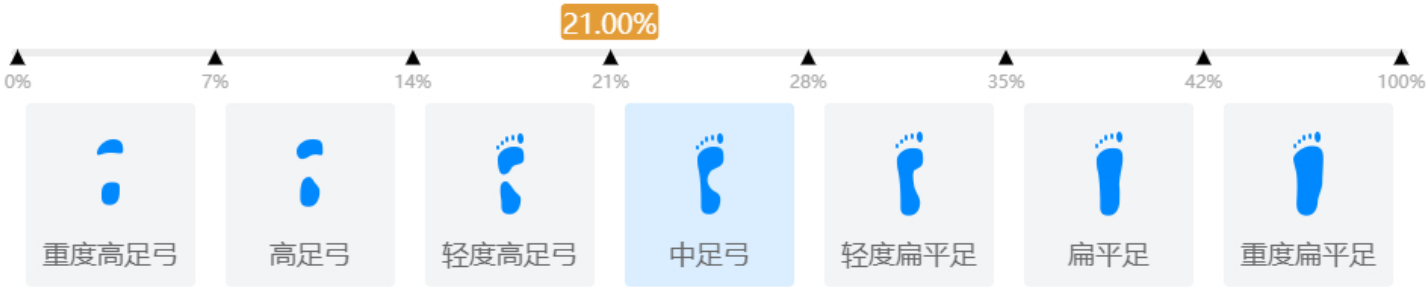

报告结论

左脚前足轻度内翻  
右脚横弓塌陷  
身体重心过度靠后
