# Supplementary material for: Individualized Corrective Training Based on Precision Biomechanical Assessment for the Prevention of Sports Injuries in Adolescents
Source: Research Square preprint supplement (doi:10.21203/rs.3.rs-8426574/v1), 2026-02-02
Supplement: Supplementary file 225 [file 静态报告-张文雅-20250226132035.pdf › Plantar pressure and gait analysis/soccer/静态报告-张文雅-20250226132035.pdf]

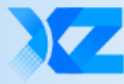

静态双脚数据

左脚

|            |      |
|------------|------|
| 面积【mm²】    | 6714 |
| 前/双足【%】    | 23   |
| 前/全足【%】    | 46   |
| 最大压强【gr/%】 | 192  |
| 平均压强【gr/%】 | 167  |

|            |      |
|------------|------|
| 面积【mm²】    | 4495 |
| 后/双足【%】    | 27   |
| 后/全足【%】    | 54   |
| 最大压强【gr/%】 | 315  |
| 平均压强【gr/%】 | 291  |

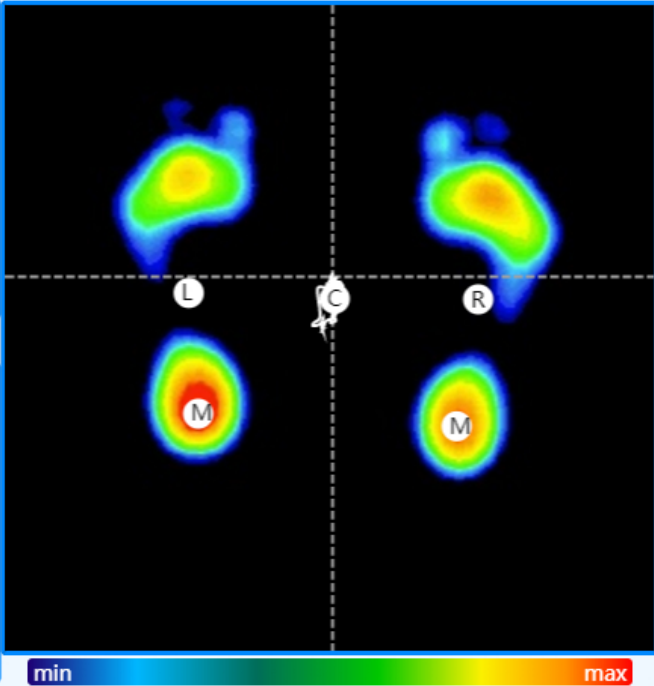

右脚

|            |      |
|------------|------|
| 面积【mm²】    | 7062 |
| 前/双足【%】    | 28   |
| 前/全足【%】    | 56   |
| 最大压强【gr/%】 | 217  |
| 平均压强【gr/%】 | 195  |

|            |      |
|------------|------|
| 面积【mm²】    | 4474 |
| 后/双足【%】    | 22   |
| 后/全足【%】    | 44   |
| 最大压强【gr/%】 | 306  |
| 平均压强【gr/%】 | 243  |

双脚综合数据

左脚总和

|            |       |
|------------|-------|
| 面积【mm²】    | 11208 |
| 负荷【%】      | 50    |
| 最大压强【gr/%】 | 225   |
| 平均压强【gr/%】 | 217   |

右脚总和

|            |       |
|------------|-------|
| 面积【mm²】    | 11536 |
| 负荷【%】      | 50    |
| 最大压强【gr/%】 | 223   |
| 平均压强【gr/%】 | 214   |

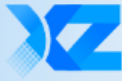

足弓类型

左脚

足弓指数 12.00%

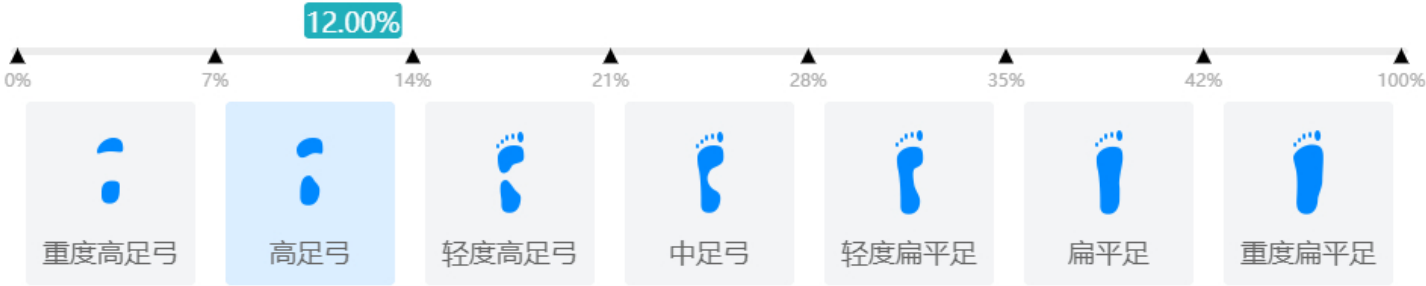

右脚

足弓指数 14.00%

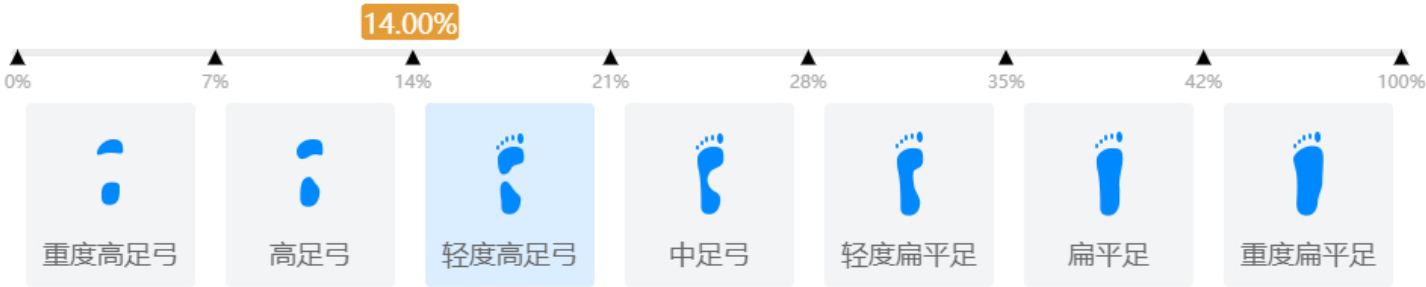

报告结论

左脚横弓塌陷  
左脚足弓过高  
右脚横弓塌陷  
右脚足弓过高  
身体重心过度靠后
