# Supplementary material for: Individualized Corrective Training Based on Precision Biomechanical Assessment for the Prevention of Sports Injuries in Adolescents
Source: Research Square preprint supplement (doi:10.21203/rs.3.rs-8426574/v1), 2026-02-02
Supplement: Supplementary file 227 [file 静态报告-曾颖雯-20250226124330.pdf › Plantar pressure and gait analysis/soccer/静态报告-曾颖雯-20250226124330.pdf]

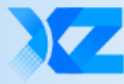

静态双脚数据

左脚

|            |      |
|------------|------|
| 面积【mm²】    | 5785 |
| 前/双足【%】    | 24   |
| 前/全足【%】    | 49   |
| 最大压强【gr/%】 | 167  |
| 平均压强【gr/%】 | 159  |

|            |      |
|------------|------|
| 面积【mm²】    | 4316 |
| 后/双足【%】    | 25   |
| 后/全足【%】    | 51   |
| 最大压强【gr/%】 | 232  |
| 平均压强【gr/%】 | 223  |

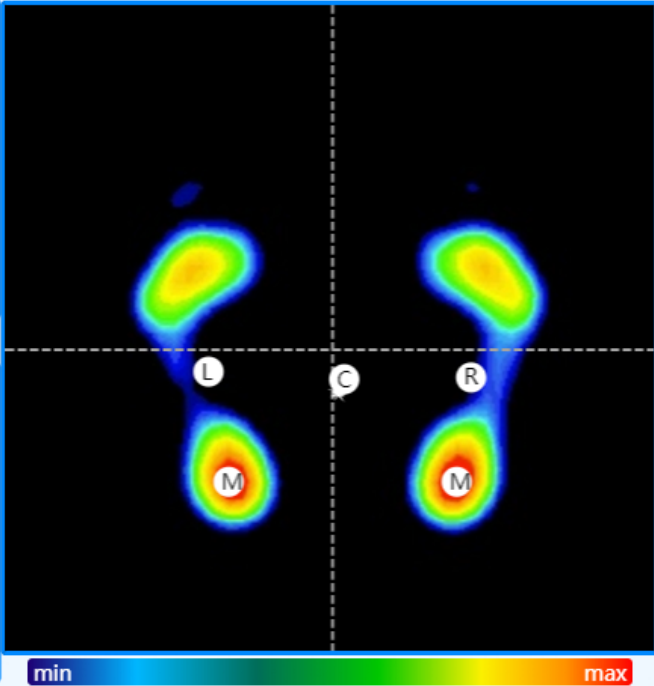

右脚

|            |      |
|------------|------|
| 面积【mm²】    | 5628 |
| 前/双足【%】    | 24   |
| 前/全足【%】    | 47   |
| 最大压强【gr/%】 | 169  |
| 平均压强【gr/%】 | 166  |

|            |      |
|------------|------|
| 面积【mm²】    | 4561 |
| 后/双足【%】    | 27   |
| 后/全足【%】    | 53   |
| 最大压强【gr/%】 | 237  |
| 平均压强【gr/%】 | 231  |

双脚综合数据

左脚总和

|            |       |
|------------|-------|
| 面积【mm²】    | 10101 |
| 负荷【%】      | 49    |
| 最大压强【gr/%】 | 193   |
| 平均压强【gr/%】 | 186   |

右脚总和

|            |       |
|------------|-------|
| 面积【mm²】    | 10189 |
| 负荷【%】      | 51    |
| 最大压强【gr/%】 | 199   |
| 平均压强【gr/%】 | 195   |



足弓类型

左脚

足弓指数 18.00%

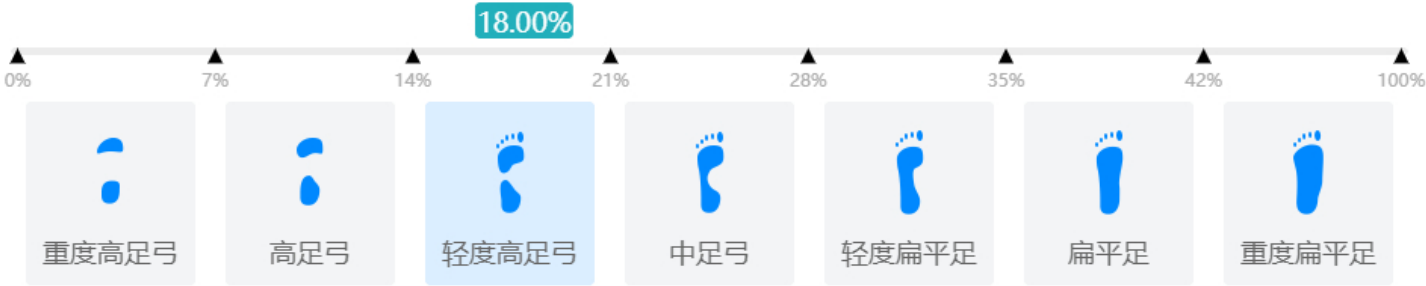

右脚

足弓指数 21.00%

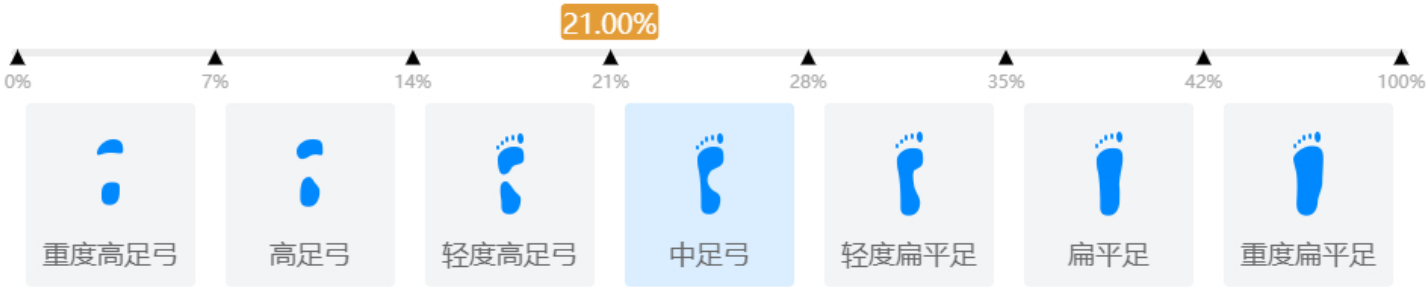

报告结论

左脚横弓塌陷  
左脚足弓偏高  
右脚横弓塌陷  
身体重心过度靠后
