# Supplementary material for: Individualized Corrective Training Based on Precision Biomechanical Assessment for the Prevention of Sports Injuries in Adolescents
Source: Research Square preprint supplement (doi:10.21203/rs.3.rs-8426574/v1), 2026-02-02
Supplement: Supplementary file 228 [file 静态报告-李冰冰-20250226144515.pdf › Plantar pressure and gait analysis/soccer/静态报告-李冰冰-20250226144515.pdf]

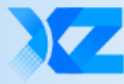

静态双脚数据

左脚

|            |      |
|------------|------|
| 面积【mm²】    | 6043 |
| 前/双足【%】    | 23   |
| 前/全足【%】    | 46   |
| 最大压强【gr/%】 | 272  |
| 平均压强【gr/%】 | 216  |

|            |      |
|------------|------|
| 面积【mm²】    | 5307 |
| 后/双足【%】    | 26   |
| 后/全足【%】    | 54   |
| 最大压强【gr/%】 | 349  |
| 平均压强【gr/%】 | 283  |

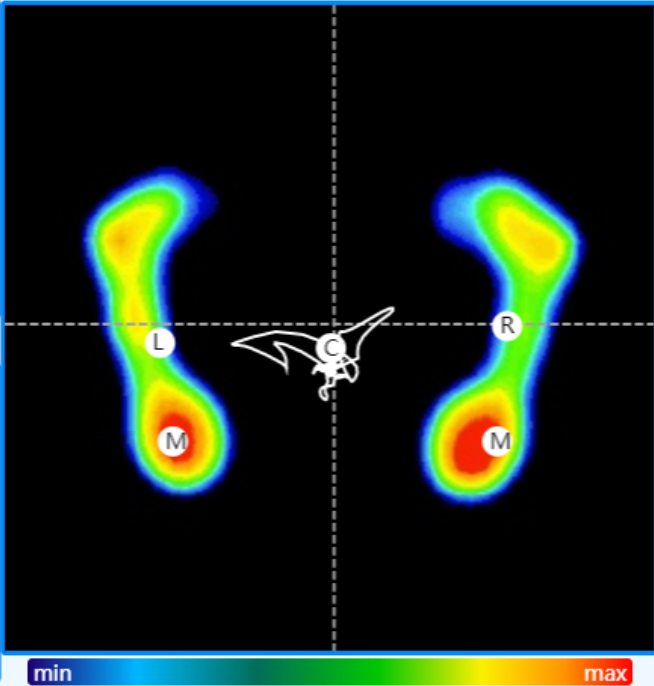

右脚

|            |      |
|------------|------|
| 面积【mm²】    | 6960 |
| 前/双足【%】    | 23   |
| 前/全足【%】    | 45   |
| 最大压强【gr/%】 | 251  |
| 平均压强【gr/%】 | 195  |

|            |      |
|------------|------|
| 面积【mm²】    | 5398 |
| 后/双足【%】    | 28   |
| 后/全足【%】    | 55   |
| 最大压强【gr/%】 | 322  |
| 平均压强【gr/%】 | 297  |

双脚综合数据

左脚总和

|            |       |
|------------|-------|
| 面积【mm²】    | 11350 |
| 负荷【%】      | 49    |
| 最大压强【gr/%】 | 294   |
| 平均压强【gr/%】 | 248   |

右脚总和

|            |       |
|------------|-------|
| 面积【mm²】    | 12358 |
| 负荷【%】      | 51    |
| 最大压强【gr/%】 | 262   |
| 平均压强【gr/%】 | 241   |

静态报告

李冰冰 22岁 女 68.0kg 168.0cm 2025-2-26 14:44:44

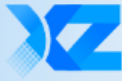

足弓类型

左脚

足弓指数 27.00%

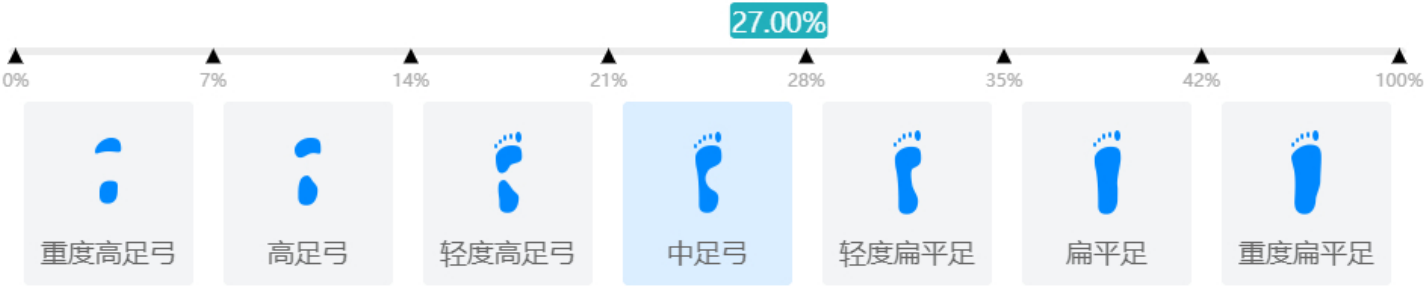

右脚

足弓指数 24.00%

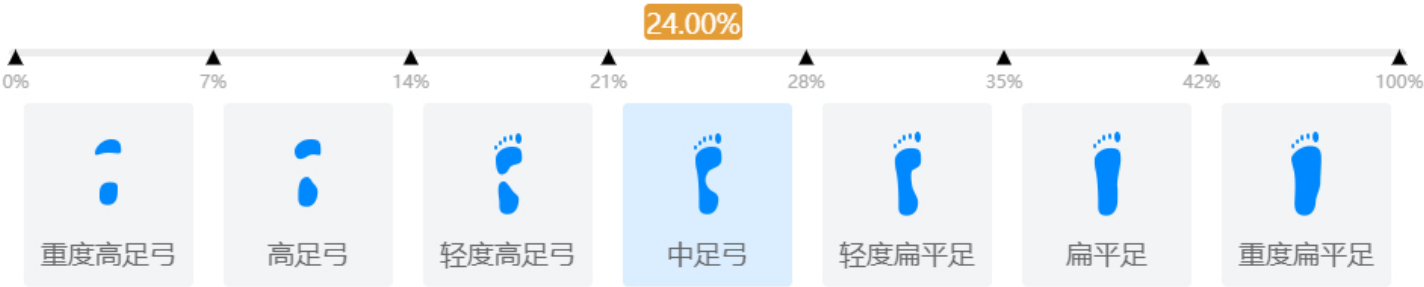

报告结论

左脚前足轻度内翻  
右脚前足轻度内翻  
身体重心过度靠后
