# Supplementary material for: Individualized Corrective Training Based on Precision Biomechanical Assessment for the Prevention of Sports Injuries in Adolescents
Source: Research Square preprint supplement (doi:10.21203/rs.3.rs-8426574/v1), 2026-02-02
Supplement: Supplementary file 229 [file 静态报告-林茜-20250226093325.pdf › Plantar pressure and gait analysis/soccer/静态报告-林茜-20250226093325.pdf]

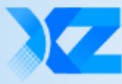

静态双脚数据

左脚

|            |      |
|------------|------|
| 面积【mm²】    | 7633 |
| 前/双足【%】    | 27   |
| 前/全足【%】    | 58   |
| 最大压强【gr/%】 | 169  |
| 平均压强【gr/%】 | 161  |

|            |      |
|------------|------|
| 面积【mm²】    | 4709 |
| 后/双足【%】    | 20   |
| 后/全足【%】    | 42   |
| 最大压强【gr/%】 | 197  |
| 平均压强【gr/%】 | 191  |

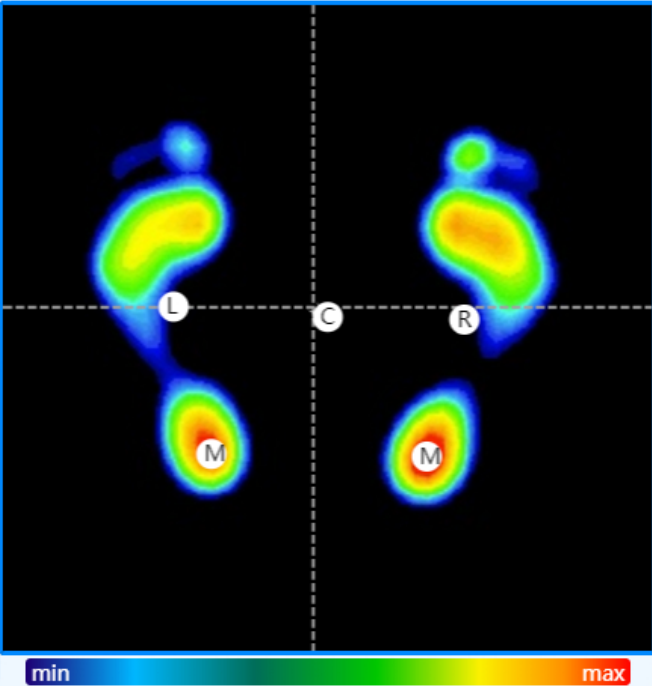

右脚

|            |      |
|------------|------|
| 面积【mm²】    | 7640 |
| 前/双足【%】    | 32   |
| 前/全足【%】    | 60   |
| 最大压强【gr/%】 | 196  |
| 平均压强【gr/%】 | 187  |

|            |      |
|------------|------|
| 面积【mm²】    | 4542 |
| 后/双足【%】    | 21   |
| 后/全足【%】    | 40   |
| 最大压强【gr/%】 | 218  |
| 平均压强【gr/%】 | 209  |

双脚综合数据

左脚总和

|            |       |
|------------|-------|
| 面积【mm²】    | 12341 |
| 负荷【%】      | 47    |
| 最大压强【gr/%】 | 176   |
| 平均压强【gr/%】 | 173   |

右脚总和

|            |       |
|------------|-------|
| 面积【mm²】    | 12182 |
| 负荷【%】      | 53    |
| 最大压强【gr/%】 | 198   |
| 平均压强【gr/%】 | 195   |



足弓类型

左脚

足弓指数 17.00%

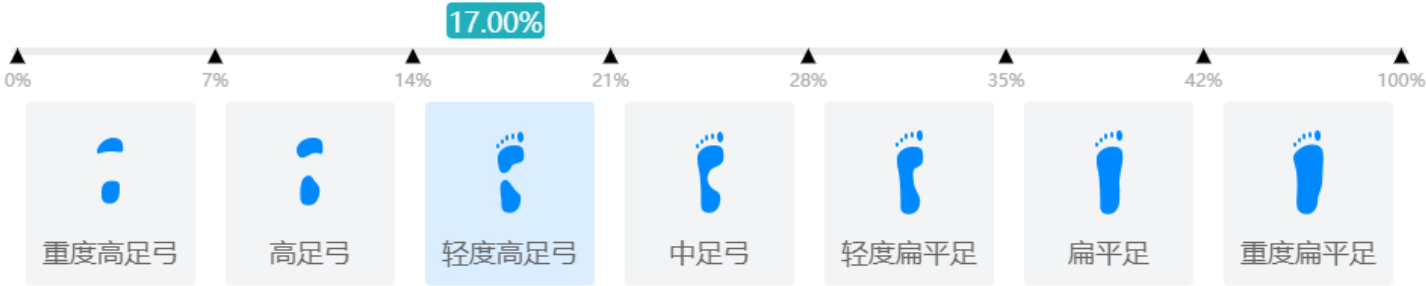

右脚

足弓指数 15.00%

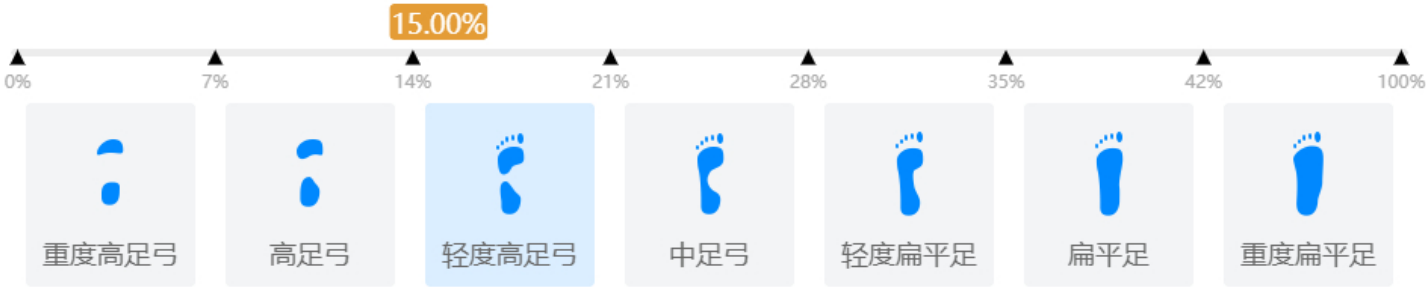

报告结论

左脚前足轻度外翻  
左脚足弓偏高  
右脚前足轻度外翻  
右脚足弓偏高  
身体重心过度靠后
