# Supplementary material for: Individualized Corrective Training Based on Precision Biomechanical Assessment for the Prevention of Sports Injuries in Adolescents
Source: Research Square preprint supplement (doi:10.21203/rs.3.rs-8426574/v1), 2026-02-02
Supplement: Supplementary file 231 [file 静态报告-柳丹琦-20250226120315.pdf › Plantar pressure and gait analysis/soccer/静态报告-柳丹琦-20250226120315.pdf]

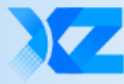

静态双脚数据

左脚

|            |      |
|------------|------|
| 面积【mm²】    | 8409 |
| 前/双足【%】    | 29   |
| 前/全足【%】    | 57   |
| 最大压强【gr/%】 | 205  |
| 平均压强【gr/%】 | 188  |

|            |      |
|------------|------|
| 面积【mm²】    | 5745 |
| 后/双足【%】    | 22   |
| 后/全足【%】    | 43   |
| 最大压强【gr/%】 | 225  |
| 平均压强【gr/%】 | 205  |

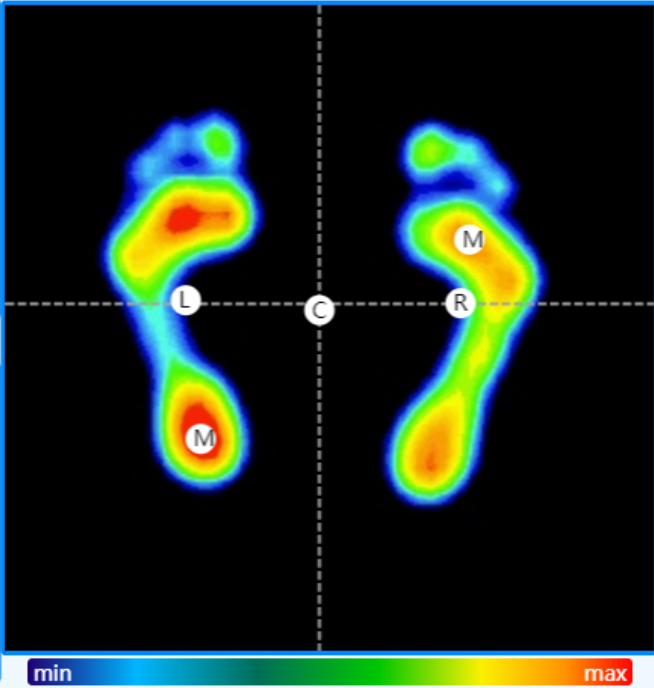

右脚

|            |      |
|------------|------|
| 面积【mm²】    | 8195 |
| 前/双足【%】    | 27   |
| 前/全足【%】    | 55   |
| 最大压强【gr/%】 | 199  |
| 平均压强【gr/%】 | 177  |

|            |      |
|------------|------|
| 面积【mm²】    | 5920 |
| 后/双足【%】    | 22   |
| 后/全足【%】    | 45   |
| 最大压强【gr/%】 | 223  |
| 平均压强【gr/%】 | 200  |

双脚综合数据

左脚总和

|            |       |
|------------|-------|
| 面积【mm²】    | 14154 |
| 负荷【%】      | 51    |
| 最大压强【gr/%】 | 203   |
| 平均压强【gr/%】 | 195   |

右脚总和

|            |       |
|------------|-------|
| 面积【mm²】    | 14115 |
| 负荷【%】      | 49    |
| 最大压强【gr/%】 | 196   |
| 平均压强【gr/%】 | 187   |



足弓类型

左脚

足弓指数 19.00%

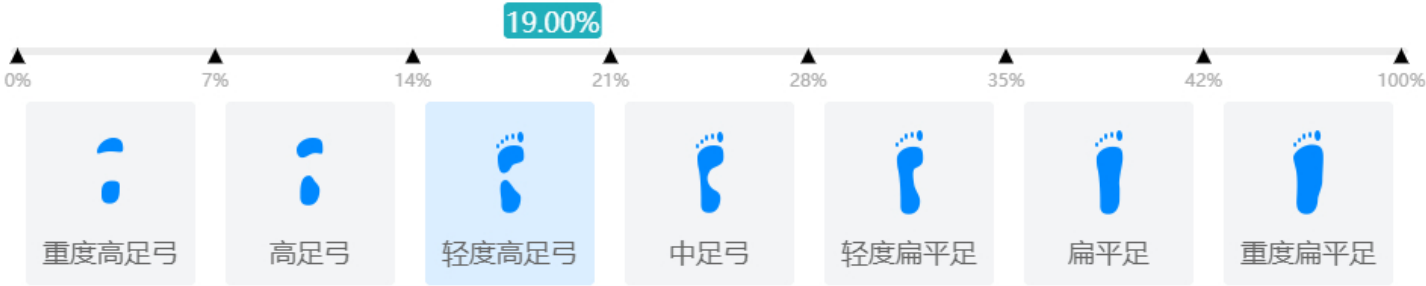

右脚

足弓指数 22.00%

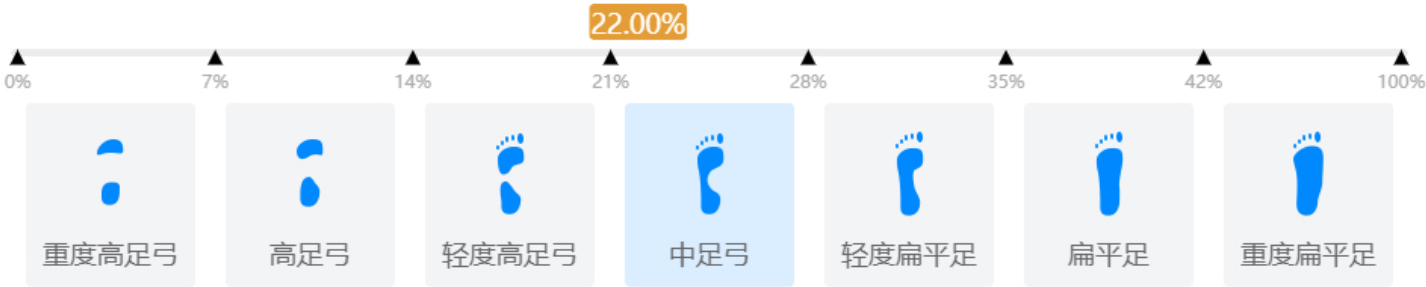

报告结论

左脚横弓塌陷  
左脚足弓偏高  
右脚横弓塌陷  
身体重心过度靠后  
左右侧足弓形状压力差异较大
