# Supplementary material for: Individualized Corrective Training Based on Precision Biomechanical Assessment for the Prevention of Sports Injuries in Adolescents
Source: Research Square preprint supplement (doi:10.21203/rs.3.rs-8426574/v1), 2026-02-02
Supplement: Supplementary file 232 [file 静态报告-梁栋-20250226110059.pdf › Plantar pressure and gait analysis/soccer/静态报告-梁栋-20250226110059.pdf]

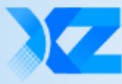

静态双脚数据

左脚

|            |      |
|------------|------|
| 面积【mm²】    | 8684 |
| 前/双足【%】    | 30   |
| 前/全足【%】    | 62   |
| 最大压强【gr/%】 | 238  |
| 平均压强【gr/%】 | 228  |

|            |      |
|------------|------|
| 面积【mm²】    | 6781 |
| 后/双足【%】    | 18   |
| 后/全足【%】    | 38   |
| 最大压强【gr/%】 | 202  |
| 平均压强【gr/%】 | 179  |

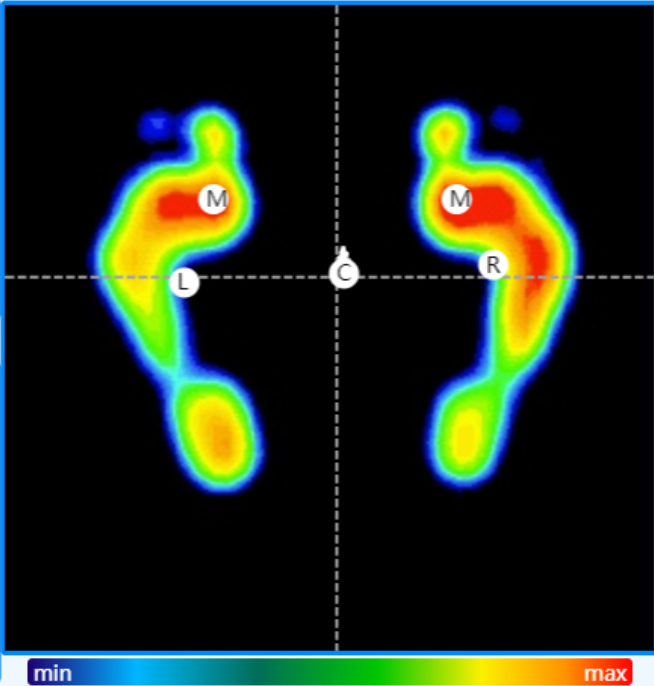

右脚

|            |      |
|------------|------|
| 面积【mm²】    | 8161 |
| 前/双足【%】    | 31   |
| 前/全足【%】    | 60   |
| 最大压强【gr/%】 | 261  |
| 平均压强【gr/%】 | 252  |

|            |      |
|------------|------|
| 面积【mm²】    | 7162 |
| 后/双足【%】    | 21   |
| 后/全足【%】    | 40   |
| 最大压强【gr/%】 | 210  |
| 平均压强【gr/%】 | 195  |

双脚综合数据

左脚总和

|            |       |
|------------|-------|
| 面积【mm²】    | 15465 |
| 负荷【%】      | 48    |
| 最大压强【gr/%】 | 216   |
| 平均压强【gr/%】 | 206   |

右脚总和

|            |       |
|------------|-------|
| 面积【mm²】    | 15323 |
| 负荷【%】      | 52    |
| 最大压强【gr/%】 | 236   |
| 平均压强【gr/%】 | 225   |

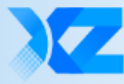

足弓类型

左脚

足弓指数 22.00%

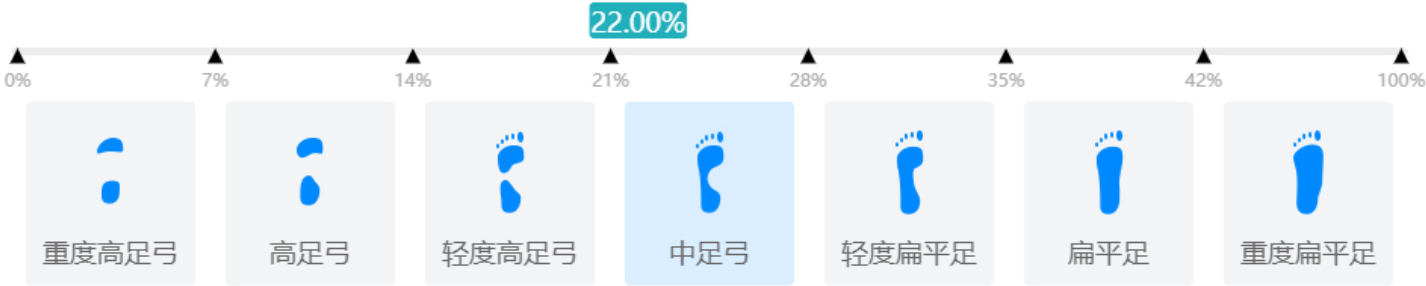

右脚

足弓指数 24.00%

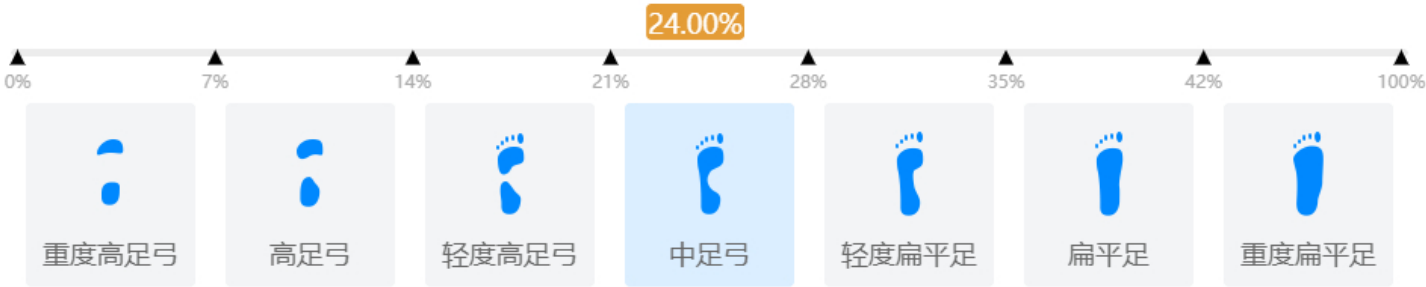

报告结论

左脚前足轻度外翻  
右脚前足轻度外翻  
身体重心过度靠前  
左右侧足弓形状压力差异较大
