# Supplementary material for: Individualized Corrective Training Based on Precision Biomechanical Assessment for the Prevention of Sports Injuries in Adolescents
Source: Research Square preprint supplement (doi:10.21203/rs.3.rs-8426574/v1), 2026-02-02
Supplement: Supplementary file 233 [file 静态报告-王俊熙-20250226151240.pdf › Plantar pressure and gait analysis/soccer/静态报告-王俊熙-20250226151240.pdf]

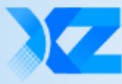

静态双脚数据

左脚

|            |      |
|------------|------|
| 面积【mm²】    | 9404 |
| 前/双足【%】    | 26   |
| 前/全足【%】    | 56   |
| 最大压强【gr/%】 | 186  |
| 平均压强【gr/%】 | 180  |

|            |      |
|------------|------|
| 面积【mm²】    | 6937 |
| 后/双足【%】    | 20   |
| 后/全足【%】    | 44   |
| 最大压强【gr/%】 | 208  |
| 平均压强【gr/%】 | 191  |

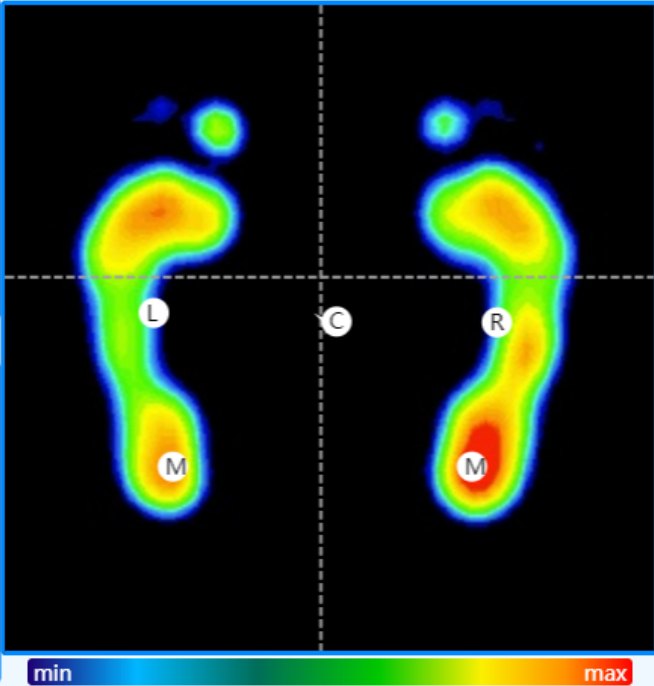

右脚

|            |      |
|------------|------|
| 面积【mm²】    | 9712 |
| 前/双足【%】    | 26   |
| 前/全足【%】    | 49   |
| 最大压强【gr/%】 | 185  |
| 平均压强【gr/%】 | 173  |

|            |      |
|------------|------|
| 面积【mm²】    | 7119 |
| 后/双足【%】    | 27   |
| 后/全足【%】    | 51   |
| 最大压强【gr/%】 | 264  |
| 平均压强【gr/%】 | 249  |

双脚综合数据

左脚总和

|            |       |
|------------|-------|
| 面积【mm²】    | 16341 |
| 负荷【%】      | 47    |
| 最大压强【gr/%】 | 195   |
| 平均压强【gr/%】 | 185   |

右脚总和

|            |       |
|------------|-------|
| 面积【mm²】    | 16831 |
| 负荷【%】      | 53    |
| 最大压强【gr/%】 | 213   |
| 平均压强【gr/%】 | 205   |



足弓类型

左脚

足弓指数 23.00%

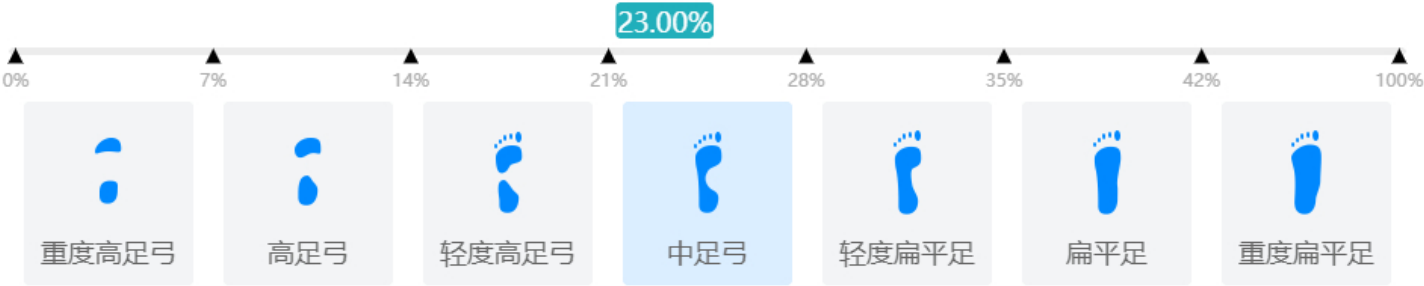

右脚

足弓指数 25.00%

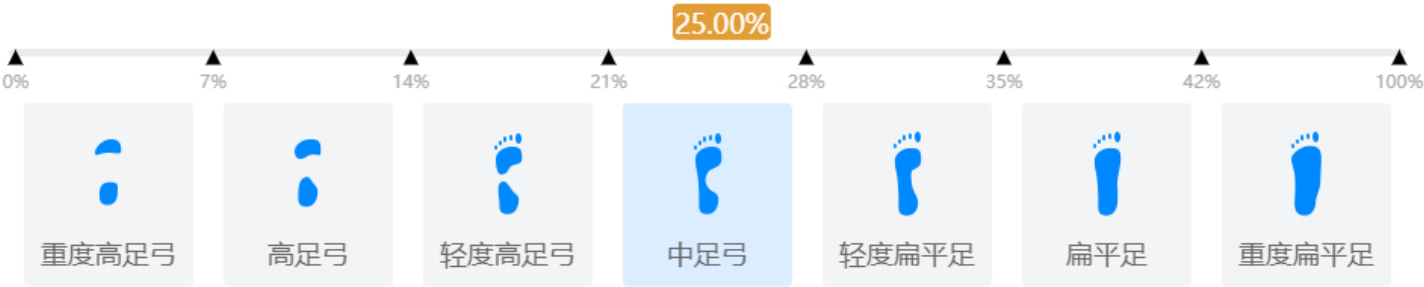

报告结论

左脚横弓塌陷  
右脚横弓塌陷  
身体重心过度靠后
