# Supplementary material for: Individualized Corrective Training Based on Precision Biomechanical Assessment for the Prevention of Sports Injuries in Adolescents
Source: Research Square preprint supplement (doi:10.21203/rs.3.rs-8426574/v1), 2026-02-02
Supplement: Supplementary file 234 [file 静态报告-王懿佳-20250226120157.pdf › Plantar pressure and gait analysis/soccer/静态报告-王懿佳-20250226120157.pdf]

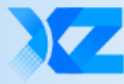

静态双脚数据

左脚

|            |      |
|------------|------|
| 面积【mm²】    | 6765 |
| 前/双足【%】    | 22   |
| 前/全足【%】    | 45   |
| 最大压强【gr/%】 | 202  |
| 平均压强【gr/%】 | 169  |

|            |      |
|------------|------|
| 面积【mm²】    | 4809 |
| 后/双足【%】    | 27   |
| 后/全足【%】    | 55   |
| 最大压强【gr/%】 | 299  |
| 平均压强【gr/%】 | 294  |

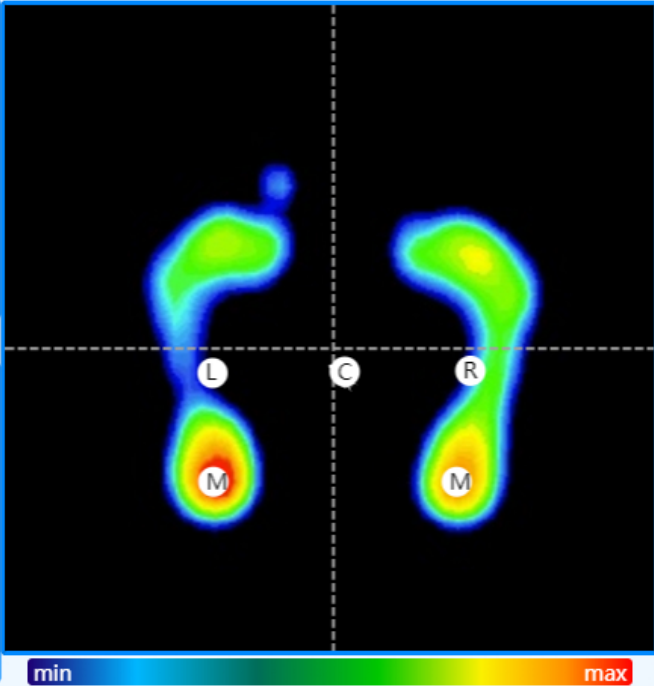

右脚

|            |      |
|------------|------|
| 面积【mm²】    | 6458 |
| 前/双足【%】    | 25   |
| 前/全足【%】    | 49   |
| 最大压强【gr/%】 | 215  |
| 平均压强【gr/%】 | 204  |

|            |      |
|------------|------|
| 面积【mm²】    | 5094 |
| 后/双足【%】    | 26   |
| 后/全足【%】    | 51   |
| 最大压强【gr/%】 | 281  |
| 平均压强【gr/%】 | 272  |

双脚综合数据

左脚总和

|            |       |
|------------|-------|
| 面积【mm²】    | 11573 |
| 负荷【%】      | 49    |
| 最大压强【gr/%】 | 239   |
| 平均压强【gr/%】 | 221   |

右脚总和

|            |       |
|------------|-------|
| 面积【mm²】    | 11552 |
| 负荷【%】      | 51    |
| 最大压强【gr/%】 | 243   |
| 平均压强【gr/%】 | 234   |



足弓类型

左脚

足弓指数 21.00%

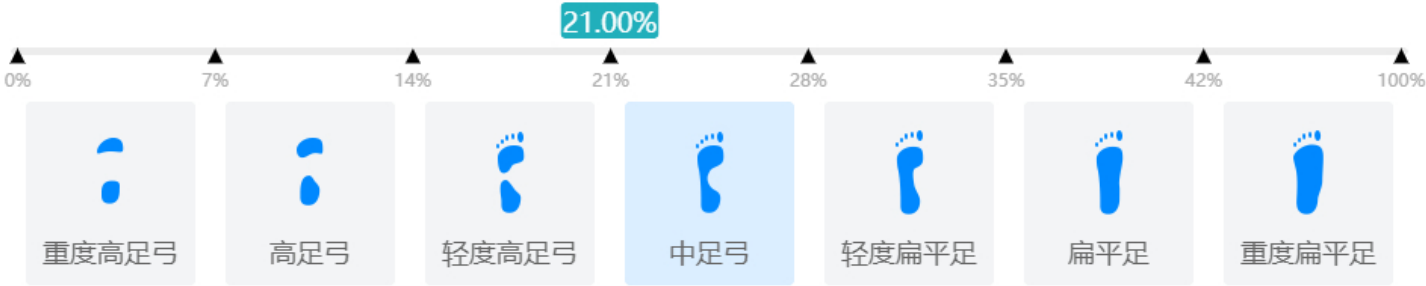

右脚

足弓指数 25.00%

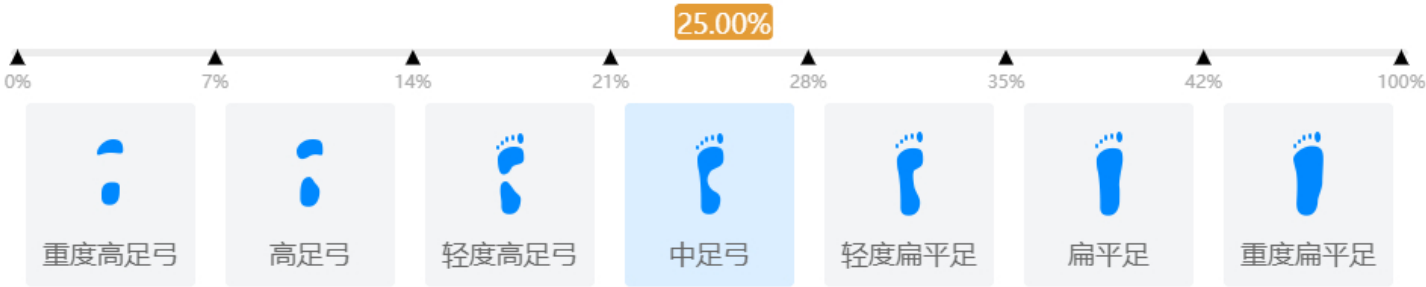

报告结论

左脚横弓塌陷  
右脚横弓塌陷  
身体重心过度靠后  
左右侧足弓形状压力差异较大
