# Supplementary material for: Individualized Corrective Training Based on Precision Biomechanical Assessment for the Prevention of Sports Injuries in Adolescents
Source: Research Square preprint supplement (doi:10.21203/rs.3.rs-8426574/v1), 2026-02-02
Supplement: Supplementary file 235 [file 静态报告-王智丹-20250226133350.pdf › Plantar pressure and gait analysis/soccer/静态报告-王智丹-20250226133350.pdf]

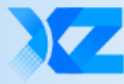

静态双脚数据

左脚

|            |      |
|------------|------|
| 面积【mm²】    | 7133 |
| 前/双足【%】    | 21   |
| 前/全足【%】    | 42   |
| 最大压强【gr/%】 | 239  |
| 平均压强【gr/%】 | 172  |

|            |      |
|------------|------|
| 面积【mm²】    | 5465 |
| 后/双足【%】    | 29   |
| 后/全足【%】    | 58   |
| 最大压强【gr/%】 | 387  |
| 平均压强【gr/%】 | 316  |

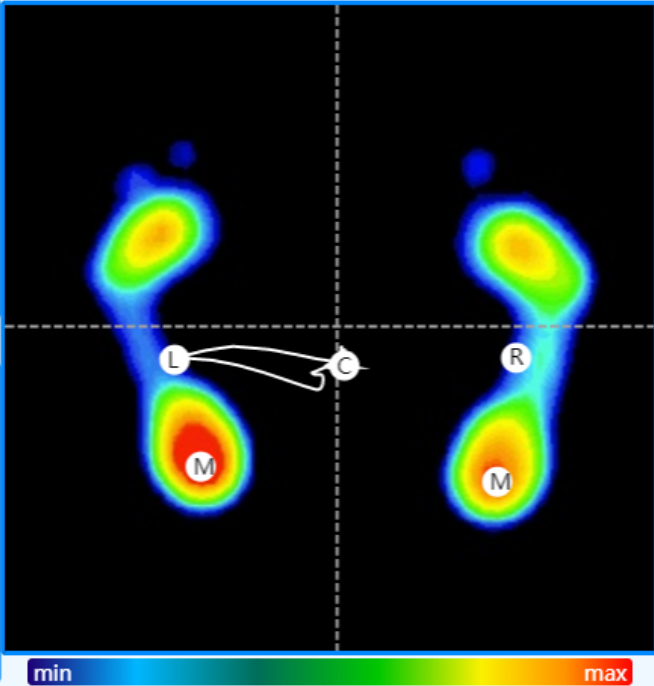

右脚

|            |      |
|------------|------|
| 面积【mm²】    | 7115 |
| 前/双足【%】    | 23   |
| 前/全足【%】    | 47   |
| 最大压强【gr/%】 | 251  |
| 平均压强【gr/%】 | 193  |

|            |      |
|------------|------|
| 面积【mm²】    | 5713 |
| 后/双足【%】    | 27   |
| 后/全足【%】    | 53   |
| 最大压强【gr/%】 | 335  |
| 平均压强【gr/%】 | 273  |

双脚综合数据

左脚总和

|            |       |
|------------|-------|
| 面积【mm²】    | 12598 |
| 负荷【%】      | 50    |
| 最大压强【gr/%】 | 302   |
| 平均压强【gr/%】 | 235   |

右脚总和

|            |       |
|------------|-------|
| 面积【mm²】    | 12828 |
| 负荷【%】      | 50    |
| 最大压强【gr/%】 | 294   |
| 平均压强【gr/%】 | 229   |

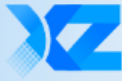

足弓类型

左脚

足弓指数 21.00%

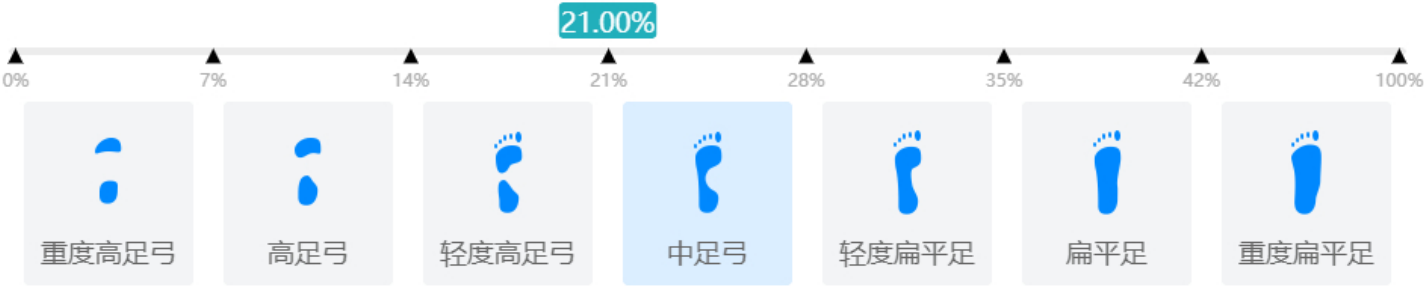

右脚

足弓指数 23.00%

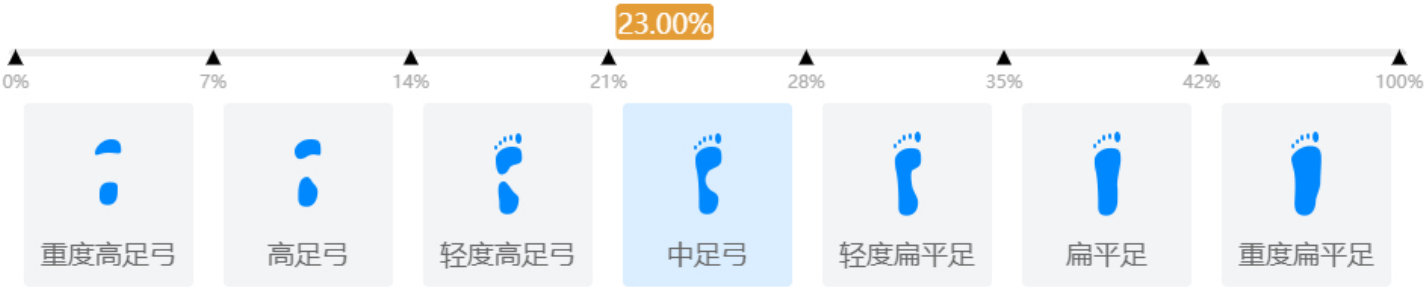

报告结论

左脚横弓塌陷  
右脚横弓塌陷  
身体重心过度靠后
