# Supplementary material for: Individualized Corrective Training Based on Precision Biomechanical Assessment for the Prevention of Sports Injuries in Adolescents
Source: Research Square preprint supplement (doi:10.21203/rs.3.rs-8426574/v1), 2026-02-02
Supplement: Supplementary file 236 [file 静态报告-王欣鑫-20250226133857.pdf › Plantar pressure and gait analysis/soccer/静态报告-王欣鑫-20250226133857.pdf]

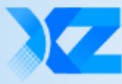

静态双脚数据

左脚

|            |      |
|------------|------|
| 面积【mm²】    | 6665 |
| 前/双足【%】    | 21   |
| 前/全足【%】    | 48   |
| 最大压强【gr/%】 | 169  |
| 平均压强【gr/%】 | 167  |

|            |      |
|------------|------|
| 面积【mm²】    | 5116 |
| 后/双足【%】    | 22   |
| 后/全足【%】    | 52   |
| 最大压强【gr/%】 | 247  |
| 平均压强【gr/%】 | 232  |

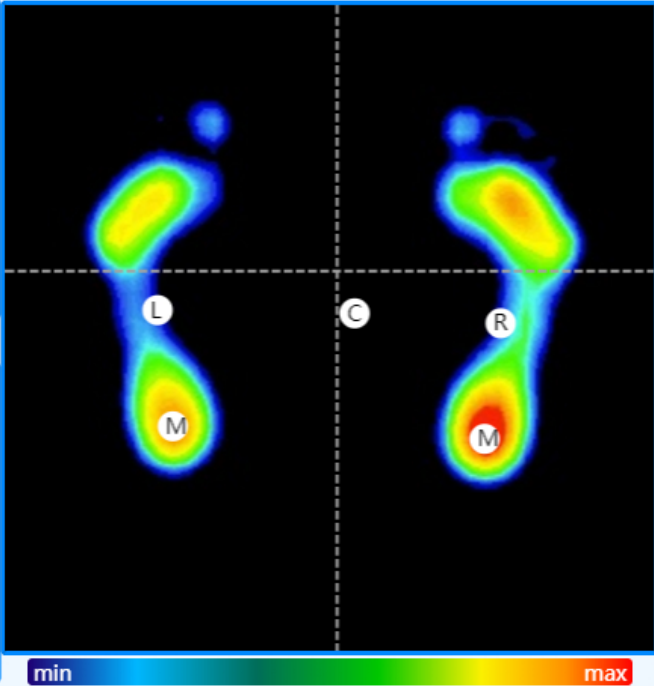

右脚

|            |      |
|------------|------|
| 面积【mm²】    | 7831 |
| 前/双足【%】    | 29   |
| 前/全足【%】    | 50   |
| 最大压强【gr/%】 | 203  |
| 平均压强【gr/%】 | 196  |

|            |      |
|------------|------|
| 面积【mm²】    | 5639 |
| 后/双足【%】    | 29   |
| 后/全足【%】    | 50   |
| 最大压强【gr/%】 | 282  |
| 平均压强【gr/%】 | 274  |

双脚综合数据

左脚总和

|            |       |
|------------|-------|
| 面积【mm²】    | 11781 |
| 负荷【%】      | 43    |
| 最大压强【gr/%】 | 200   |
| 平均压强【gr/%】 | 195   |

右脚总和

|            |       |
|------------|-------|
| 面积【mm²】    | 13470 |
| 负荷【%】      | 57    |
| 最大压强【gr/%】 | 232   |
| 平均压强【gr/%】 | 228   |

静态报告

王欣鑫 21岁 女 60.0kg 168.0cm 2025-2-26 13:38:25

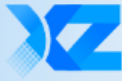

足弓类型

左脚

足弓指数 22.00%

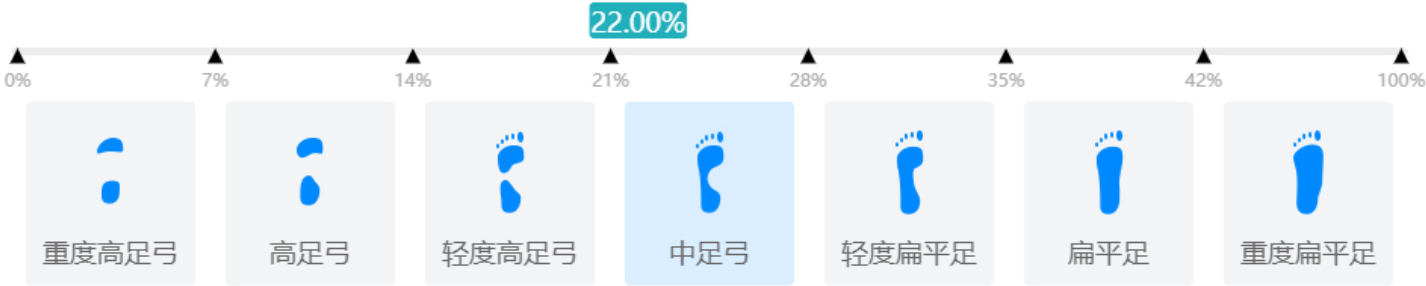

右脚

足弓指数 22.00%

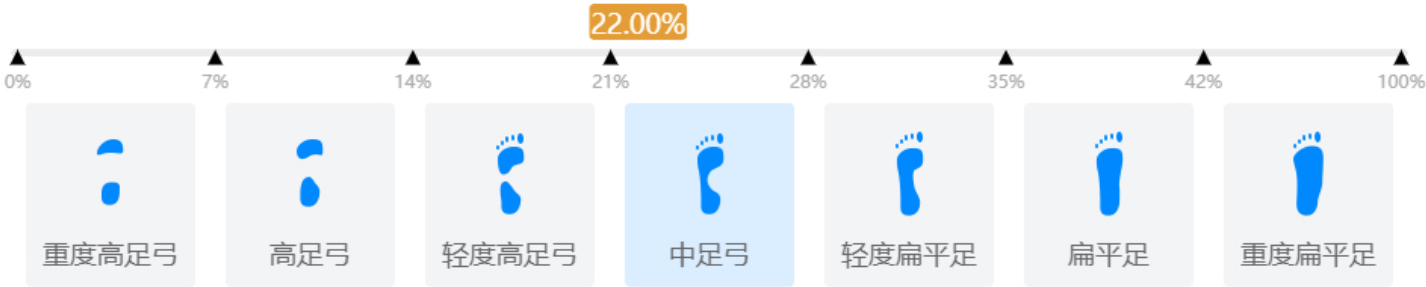

报告结论

左脚横弓塌陷  
右脚横弓塌陷  
身体重心过度靠后
