# Supplementary material for: Individualized Corrective Training Based on Precision Biomechanical Assessment for the Prevention of Sports Injuries in Adolescents
Source: Research Square preprint supplement (doi:10.21203/rs.3.rs-8426574/v1), 2026-02-02
Supplement: Supplementary file 238 [file 静态报告-王硕-20250226150715.pdf › Plantar pressure and gait analysis/soccer/静态报告-王硕-20250226150715.pdf]

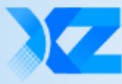

静态双脚数据

左脚

|            |      |
|------------|------|
| 面积【mm²】    | 5759 |
| 前/双足【%】    | 18   |
| 前/全足【%】    | 38   |
| 最大压强【gr/%】 | 168  |
| 平均压强【gr/%】 | 157  |

|            |      |
|------------|------|
| 面积【mm²】    | 5013 |
| 后/双足【%】    | 29   |
| 后/全足【%】    | 62   |
| 最大压强【gr/%】 | 301  |
| 平均压强【gr/%】 | 289  |

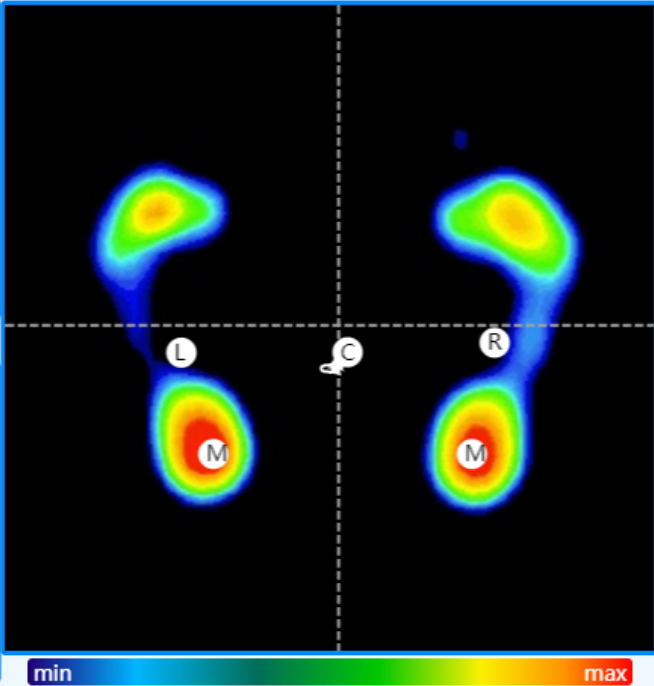

右脚

|            |      |
|------------|------|
| 面积【mm²】    | 6775 |
| 前/双足【%】    | 24   |
| 前/全足【%】    | 45   |
| 最大压强【gr/%】 | 197  |
| 平均压强【gr/%】 | 178  |

|            |      |
|------------|------|
| 面积【mm²】    | 5509 |
| 后/双足【%】    | 29   |
| 后/全足【%】    | 55   |
| 最大压强【gr/%】 | 275  |
| 平均压强【gr/%】 | 263  |

双脚综合数据

左脚总和

|            |       |
|------------|-------|
| 面积【mm²】    | 10772 |
| 负荷【%】      | 47    |
| 最大压强【gr/%】 | 225   |
| 平均压强【gr/%】 | 218   |

右脚总和

|            |       |
|------------|-------|
| 面积【mm²】    | 12284 |
| 负荷【%】      | 53    |
| 最大压强【gr/%】 | 222   |
| 平均压强【gr/%】 | 216   |

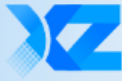

足弓类型

左脚

足弓指数 17.00%

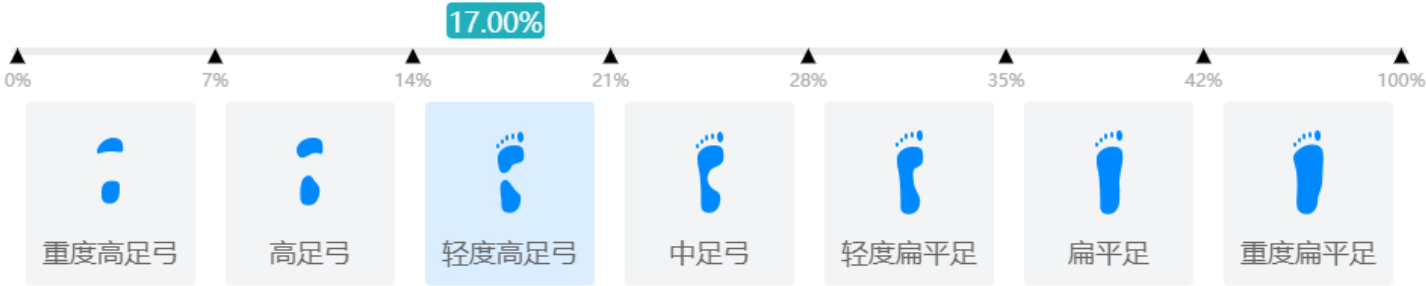

右脚

足弓指数 21.00%

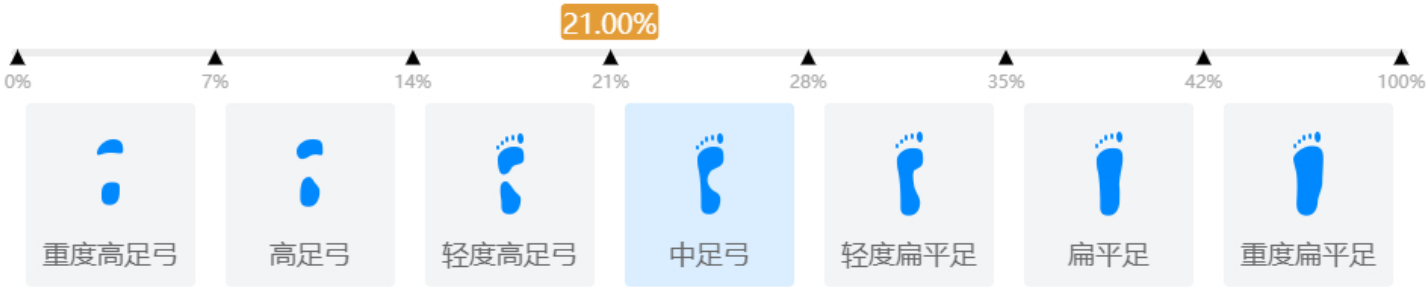

报告结论

左脚横弓塌陷  
左脚足弓偏高  
右脚横弓塌陷  
身体重心过度靠后  
左右侧足弓形状压力差异较大
