# Supplementary material for: Individualized Corrective Training Based on Precision Biomechanical Assessment for the Prevention of Sports Injuries in Adolescents
Source: Research Square preprint supplement (doi:10.21203/rs.3.rs-8426574/v1), 2026-02-02
Supplement: Supplementary file 239 [file 静态报告-王舒畅-20250226105007.pdf › Plantar pressure and gait analysis/soccer/静态报告-王舒畅-20250226105007.pdf]

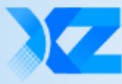

静态双脚数据

左脚

|            |      |
|------------|------|
| 面积【mm²】    | 7992 |
| 前/双足【%】    | 28   |
| 前/全足【%】    | 61   |
| 最大压强【gr/%】 | 235  |
| 平均压强【gr/%】 | 213  |

|            |      |
|------------|------|
| 面积【mm²】    | 5342 |
| 后/双足【%】    | 18   |
| 后/全足【%】    | 39   |
| 最大压强【gr/%】 | 281  |
| 平均压强【gr/%】 | 203  |

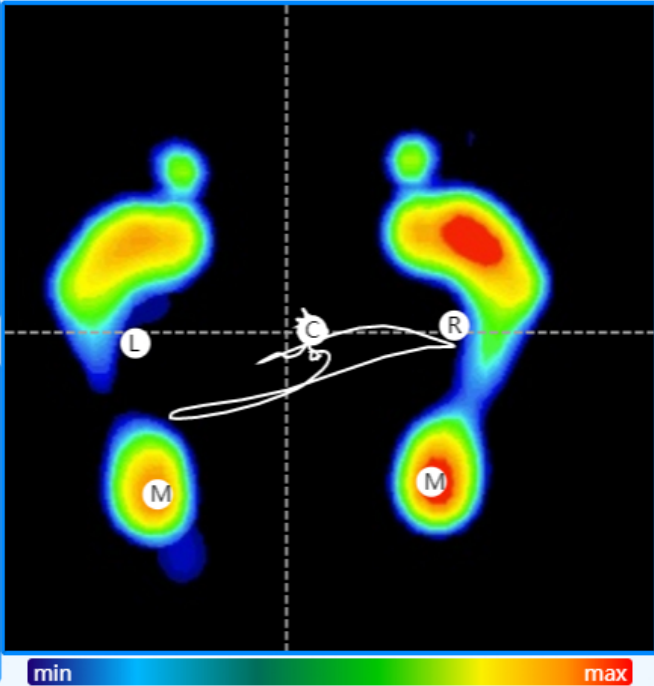

右脚

|            |      |
|------------|------|
| 面积【mm²】    | 8310 |
| 前/双足【%】    | 33   |
| 前/全足【%】    | 61   |
| 最大压强【gr/%】 | 256  |
| 平均压强【gr/%】 | 243  |

|            |      |
|------------|------|
| 面积【mm²】    | 6277 |
| 后/双足【%】    | 21   |
| 后/全足【%】    | 39   |
| 最大压强【gr/%】 | 296  |
| 平均压强【gr/%】 | 203  |

双脚综合数据

左脚总和

|            |       |
|------------|-------|
| 面积【mm²】    | 13335 |
| 负荷【%】      | 46    |
| 最大压强【gr/%】 | 264   |
| 平均压强【gr/%】 | 209   |

右脚总和

|            |       |
|------------|-------|
| 面积【mm²】    | 14587 |
| 负荷【%】      | 54    |
| 最大压强【gr/%】 | 273   |
| 平均压强【gr/%】 | 226   |

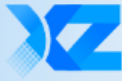

足弓类型

左脚

足弓指数 17.00%

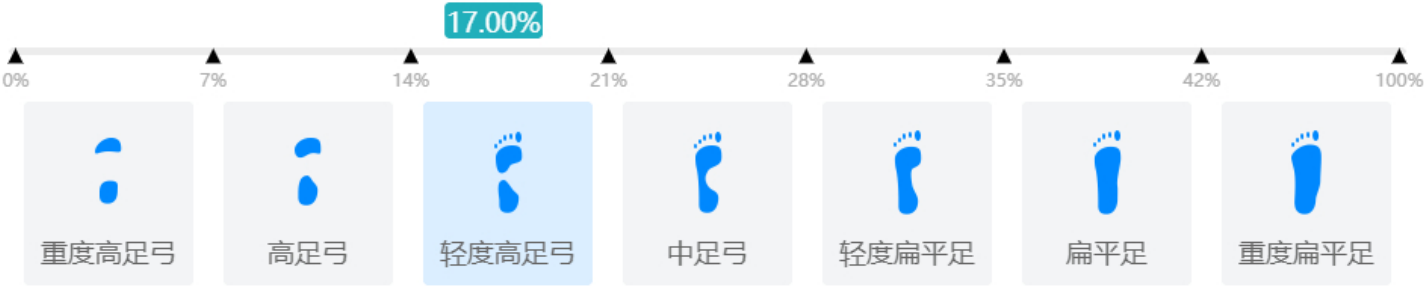

右脚

足弓指数 20.00%

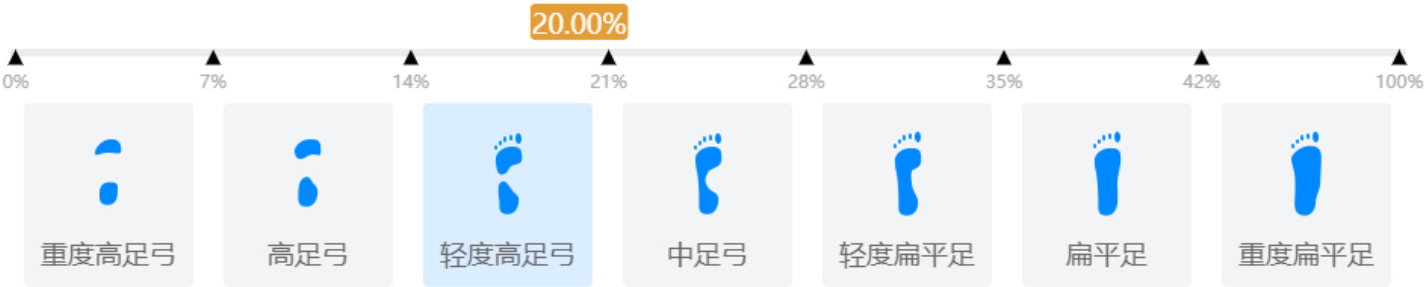

报告结论

左脚横弓塌陷  
左脚足弓偏高  
右脚横弓塌陷  
右脚足弓偏高  
身体重心过度靠前
