# Supplementary material for: Individualized Corrective Training Based on Precision Biomechanical Assessment for the Prevention of Sports Injuries in Adolescents
Source: Research Square preprint supplement (doi:10.21203/rs.3.rs-8426574/v1), 2026-02-02
Supplement: Supplementary file 240 [file 静态报告-白立慧-20250226111810.pdf › Plantar pressure and gait analysis/soccer/静态报告-白立慧-20250226111810.pdf]

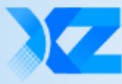

静态双脚数据

左脚

|            |      |
|------------|------|
| 面积【mm²】    | 4880 |
| 前/双足【%】    | 22   |
| 前/全足【%】    | 42   |
| 最大压强【gr/%】 | 198  |
| 平均压强【gr/%】 | 173  |

|            |      |
|------------|------|
| 面积【mm²】    | 4244 |
| 后/双足【%】    | 31   |
| 后/全足【%】    | 58   |
| 最大压强【gr/%】 | 290  |
| 平均压强【gr/%】 | 280  |

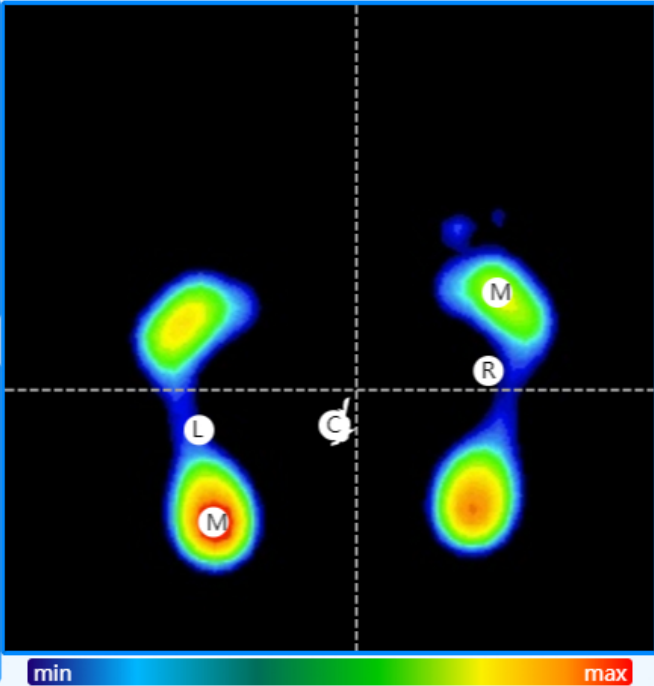

右脚

|            |      |
|------------|------|
| 面积【mm²】    | 5569 |
| 前/双足【%】    | 20   |
| 前/全足【%】    | 43   |
| 最大压强【gr/%】 | 175  |
| 平均压强【gr/%】 | 139  |

|            |      |
|------------|------|
| 面积【mm²】    | 4301 |
| 后/双足【%】    | 27   |
| 后/全足【%】    | 57   |
| 最大压强【gr/%】 | 255  |
| 平均压强【gr/%】 | 239  |

双脚综合数据

左脚总和

|            |      |
|------------|------|
| 面积【mm²】    | 9124 |
| 负荷【%】      | 53   |
| 最大压强【gr/%】 | 228  |
| 平均压强【gr/%】 | 223  |

右脚总和

|            |      |
|------------|------|
| 面积【mm²】    | 9870 |
| 负荷【%】      | 47   |
| 最大压强【gr/%】 | 194  |
| 平均压强【gr/%】 | 183  |

静态报告

白立慧 20岁 女 48.0kg 161.0cm 2025-2-26 11:17:23

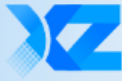

足弓类型

左脚

足弓指数 22.00%

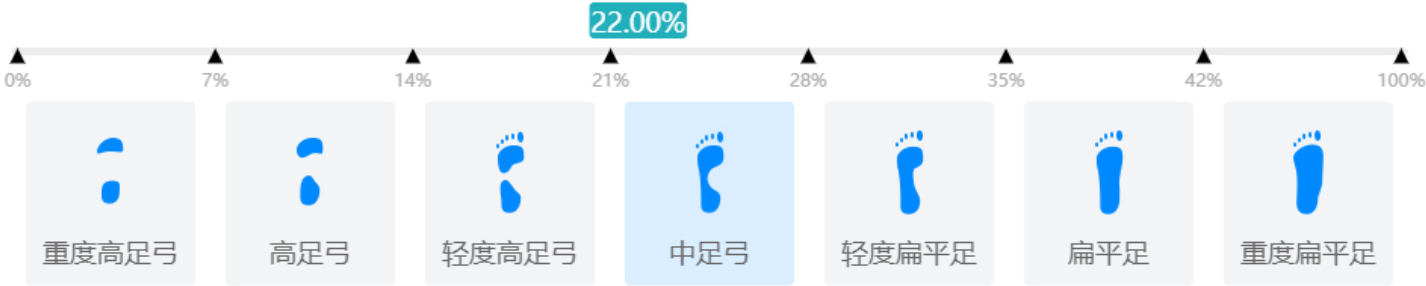

右脚

足弓指数 18.00%

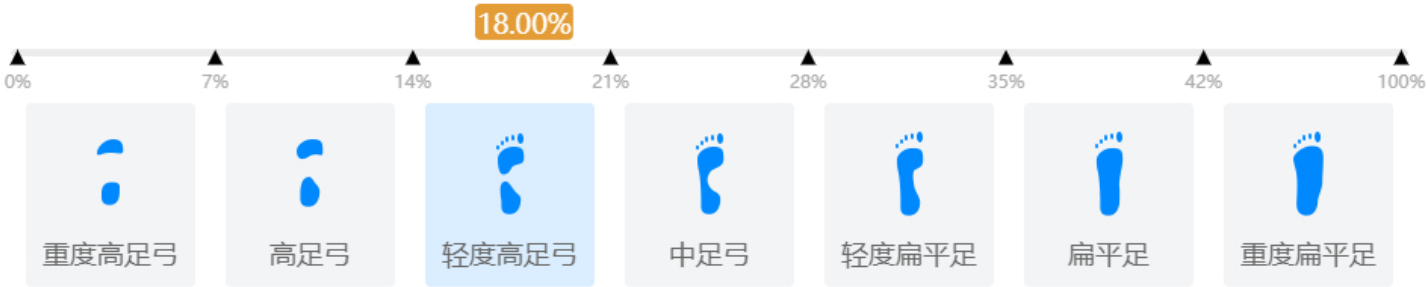

报告结论

左脚横弓塌陷  
右脚横弓塌陷  
右脚足弓偏高  
身体重心过度靠后
