# Supplementary material for: Individualized Corrective Training Based on Precision Biomechanical Assessment for the Prevention of Sports Injuries in Adolescents
Source: Research Square preprint supplement (doi:10.21203/rs.3.rs-8426574/v1), 2026-02-02
Supplement: Supplementary file 243 [file 静态报告-袁欣羽-20250226115732.pdf › Plantar pressure and gait analysis/soccer/静态报告-袁欣羽-20250226115732.pdf]

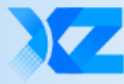

静态双脚数据

左脚

|            |      |
|------------|------|
| 面积【mm²】    | 7463 |
| 前/双足【%】    | 25   |
| 前/全足【%】    | 53   |
| 最大压强【gr/%】 | 180  |
| 平均压强【gr/%】 | 172  |

|            |      |
|------------|------|
| 面积【mm²】    | 5068 |
| 后/双足【%】    | 23   |
| 后/全足【%】    | 47   |
| 最大压强【gr/%】 | 236  |
| 平均压强【gr/%】 | 228  |

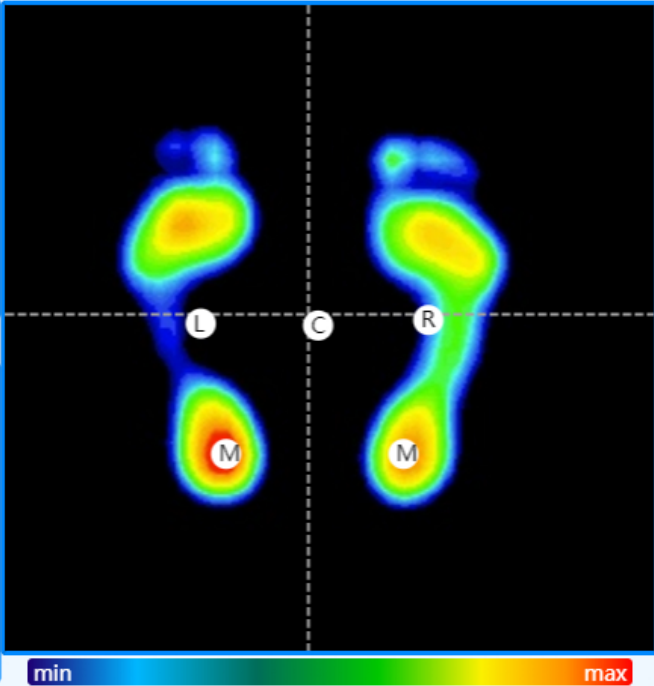

右脚

|            |      |
|------------|------|
| 面积【mm²】    | 8025 |
| 前/双足【%】    | 28   |
| 前/全足【%】    | 54   |
| 最大压强【gr/%】 | 186  |
| 平均压强【gr/%】 | 177  |

|            |      |
|------------|------|
| 面积【mm²】    | 5783 |
| 后/双足【%】    | 24   |
| 后/全足【%】    | 46   |
| 最大压强【gr/%】 | 221  |
| 平均压强【gr/%】 | 207  |

双脚综合数据

左脚总和

|            |       |
|------------|-------|
| 面积【mm²】    | 12531 |
| 负荷【%】      | 48    |
| 最大压强【gr/%】 | 201   |
| 平均压强【gr/%】 | 195   |

右脚总和

|            |       |
|------------|-------|
| 面积【mm²】    | 13808 |
| 负荷【%】      | 52    |
| 最大压强【gr/%】 | 198   |
| 平均压强【gr/%】 | 190   |

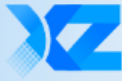

足弓类型

左脚

足弓指数 16.00%

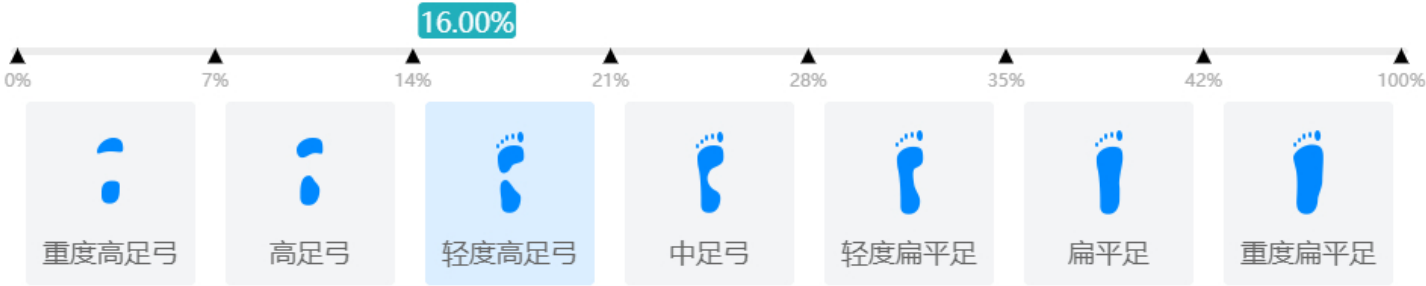

右脚

足弓指数 22.00%

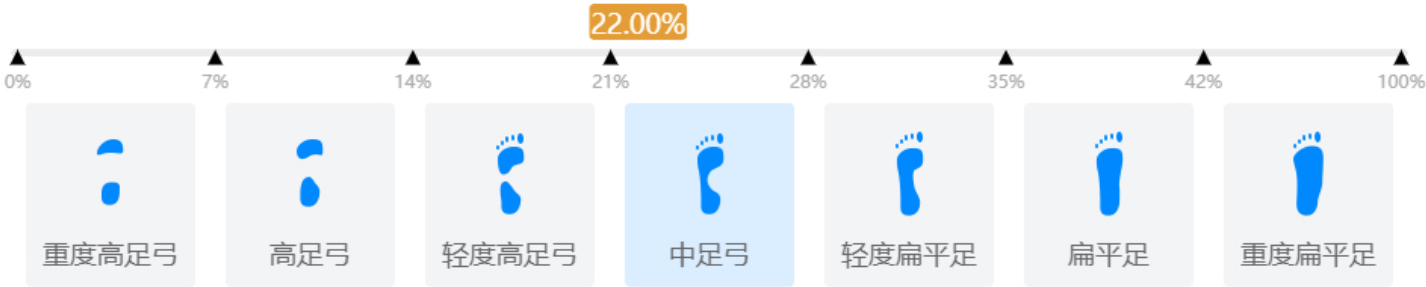

报告结论

左脚横弓塌陷  
左脚足弓偏高  
右脚横弓塌陷  
身体重心过度靠后  
左右侧足弓形状压力差异较大
