# Supplementary material for: Individualized Corrective Training Based on Precision Biomechanical Assessment for the Prevention of Sports Injuries in Adolescents
Source: Research Square preprint supplement (doi:10.21203/rs.3.rs-8426574/v1), 2026-02-02
Supplement: Supplementary file 244 [file 静态报告-赵亮-20250226120038.pdf › Plantar pressure and gait analysis/soccer/静态报告-赵亮-20250226120038.pdf]

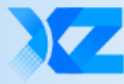

静态双脚数据

左脚

|            |      |
|------------|------|
| 面积【mm²】    | 8292 |
| 前/双足【%】    | 25   |
| 前/全足【%】    | 50   |
| 最大压强【gr/%】 | 251  |
| 平均压强【gr/%】 | 216  |

|            |      |
|------------|------|
| 面积【mm²】    | 6337 |
| 后/双足【%】    | 25   |
| 后/全足【%】    | 50   |
| 最大压强【gr/%】 | 302  |
| 平均压强【gr/%】 | 279  |

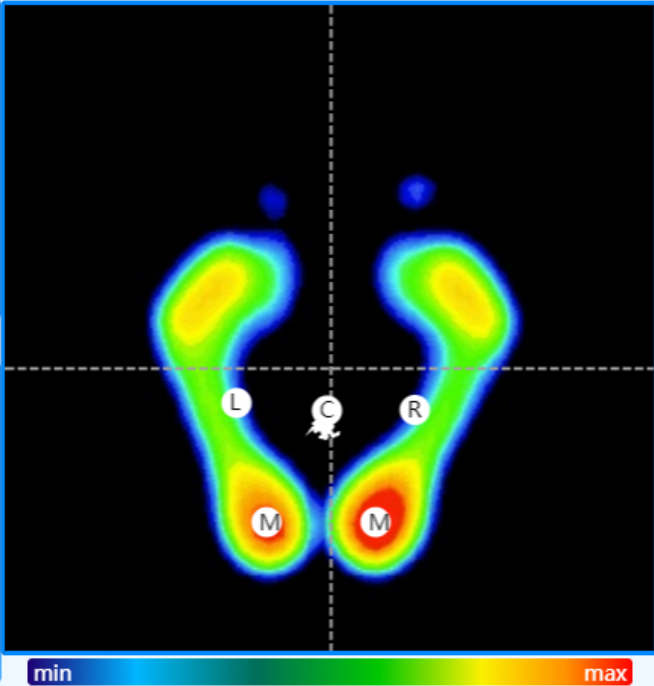

右脚

|            |      |
|------------|------|
| 面积【mm²】    | 8176 |
| 前/双足【%】    | 23   |
| 前/全足【%】    | 46   |
| 最大压强【gr/%】 | 246  |
| 平均压强【gr/%】 | 204  |

|            |      |
|------------|------|
| 面积【mm²】    | 6012 |
| 后/双足【%】    | 27   |
| 后/全足【%】    | 54   |
| 最大压强【gr/%】 | 353  |
| 平均压强【gr/%】 | 325  |

双脚综合数据

左脚总和

|            |       |
|------------|-------|
| 面积【mm²】    | 14629 |
| 负荷【%】      | 50    |
| 最大压强【gr/%】 | 269   |
| 平均压强【gr/%】 | 243   |

右脚总和

|            |       |
|------------|-------|
| 面积【mm²】    | 14187 |
| 负荷【%】      | 50    |
| 最大压强【gr/%】 | 275   |
| 平均压强【gr/%】 | 255   |

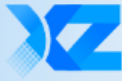

足弓类型

左脚

足弓指数 24.00%

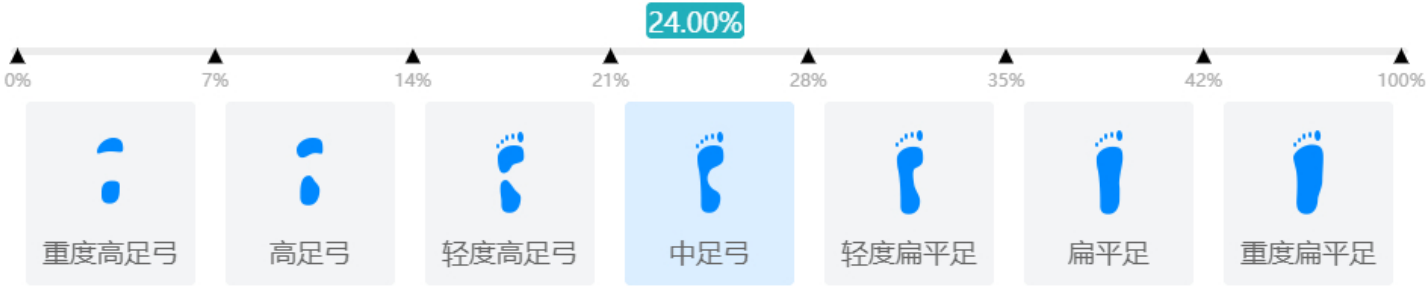

右脚

足弓指数 24.00%

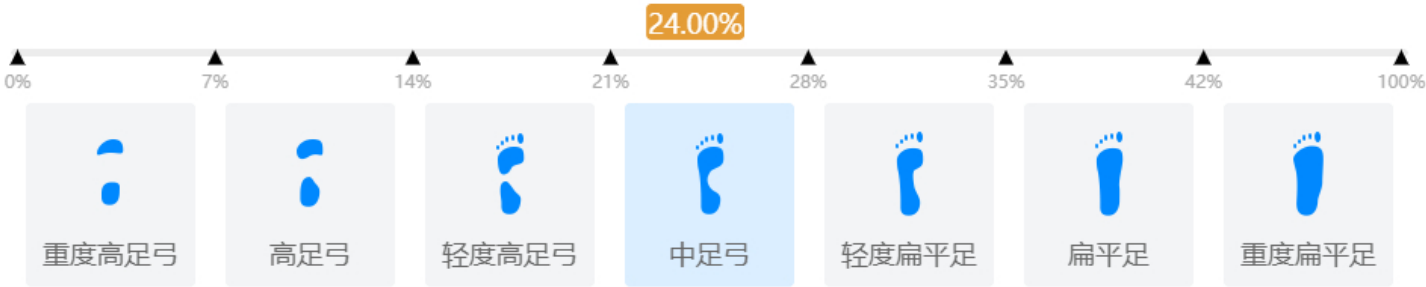

报告结论

左脚横弓塌陷  
右脚横弓塌陷  
身体重心过度靠后
