# Supplementary material for: Individualized Corrective Training Based on Precision Biomechanical Assessment for the Prevention of Sports Injuries in Adolescents
Source: Research Square preprint supplement (doi:10.21203/rs.3.rs-8426574/v1), 2026-02-02
Supplement: Supplementary file 245 [file 静态报告-赵院林-20250226112407.pdf › Plantar pressure and gait analysis/soccer/静态报告-赵院林-20250226112407.pdf]

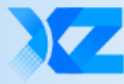

静态双脚数据

左脚

|            |      |
|------------|------|
| 面积【mm²】    | 6527 |
| 前/双足【%】    | 24   |
| 前/全足【%】    | 46   |
| 最大压强【gr/%】 | 245  |
| 平均压强【gr/%】 | 178  |

|            |      |
|------------|------|
| 面积【mm²】    | 4995 |
| 后/双足【%】    | 28   |
| 后/全足【%】    | 54   |
| 最大压强【gr/%】 | 305  |
| 平均压强【gr/%】 | 272  |

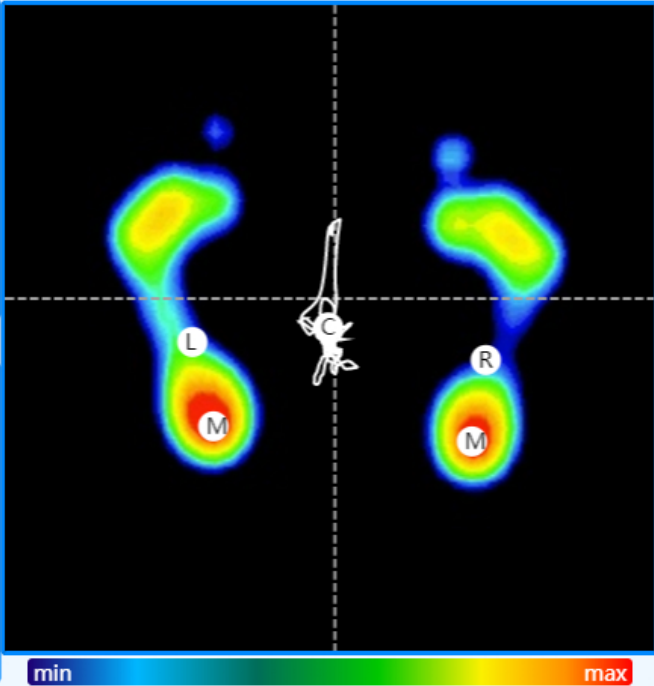

右脚

|            |      |
|------------|------|
| 面积【mm²】    | 6432 |
| 前/双足【%】    | 24   |
| 前/全足【%】    | 50   |
| 最大压强【gr/%】 | 255  |
| 平均压强【gr/%】 | 175  |

|            |      |
|------------|------|
| 面积【mm²】    | 4676 |
| 后/双足【%】    | 24   |
| 后/全足【%】    | 50   |
| 最大压强【gr/%】 | 295  |
| 平均压强【gr/%】 | 240  |

双脚综合数据

左脚总和

|            |       |
|------------|-------|
| 面积【mm²】    | 11521 |
| 负荷【%】      | 53    |
| 最大压强【gr/%】 | 244   |
| 平均压强【gr/%】 | 222   |

右脚总和

|            |       |
|------------|-------|
| 面积【mm²】    | 11108 |
| 负荷【%】      | 47    |
| 最大压强【gr/%】 | 242   |
| 平均压强【gr/%】 | 207   |

静态报告

赵院林 22岁 女 59.0kg 158.0cm 2025-2-26 11:23:17



足弓类型

左脚

足弓指数 23.00%

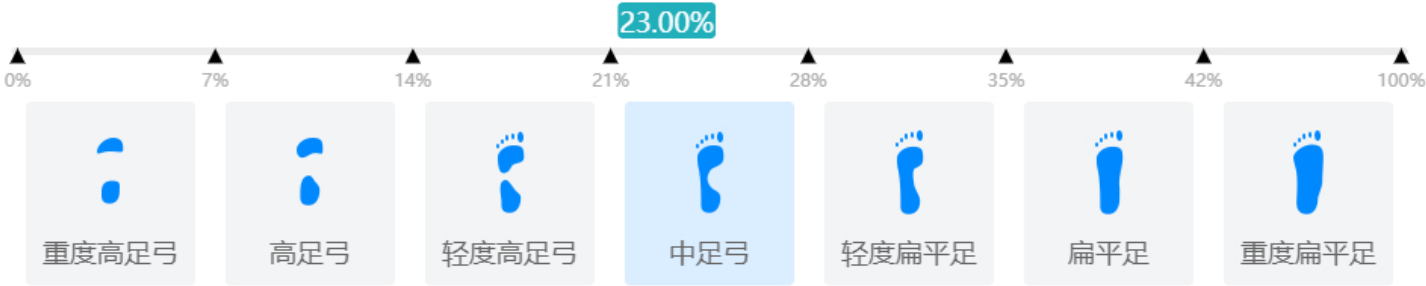

右脚

足弓指数 20.00%

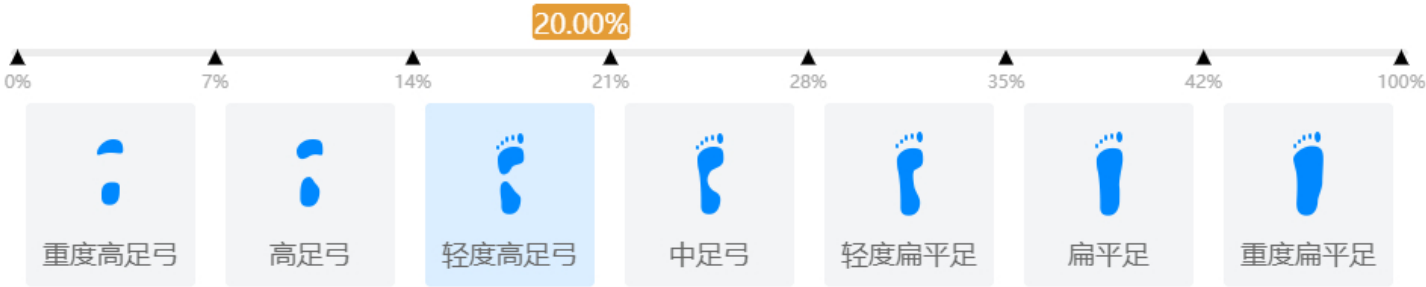

报告结论

左脚横弓塌陷  
右脚横弓塌陷  
右脚足弓偏高  
身体重心过度靠后
