# Supplementary material for: Individualized Corrective Training Based on Precision Biomechanical Assessment for the Prevention of Sports Injuries in Adolescents
Source: Research Square preprint supplement (doi:10.21203/rs.3.rs-8426574/v1), 2026-02-02
Supplement: Supplementary file 246 [file 静态报告-陈明慧-20250226132750.pdf › Plantar pressure and gait analysis/soccer/静态报告-陈明慧-20250226132750.pdf]

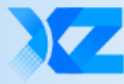

静态双脚数据

左脚

|            |      |
|------------|------|
| 面积【mm²】    | 7254 |
| 前/双足【%】    | 22   |
| 前/全足【%】    | 46   |
| 最大压强【gr/%】 | 187  |
| 平均压强【gr/%】 | 177  |

|            |      |
|------------|------|
| 面积【mm²】    | 5687 |
| 后/双足【%】    | 27   |
| 后/全足【%】    | 54   |
| 最大压强【gr/%】 | 277  |
| 平均压强【gr/%】 | 268  |

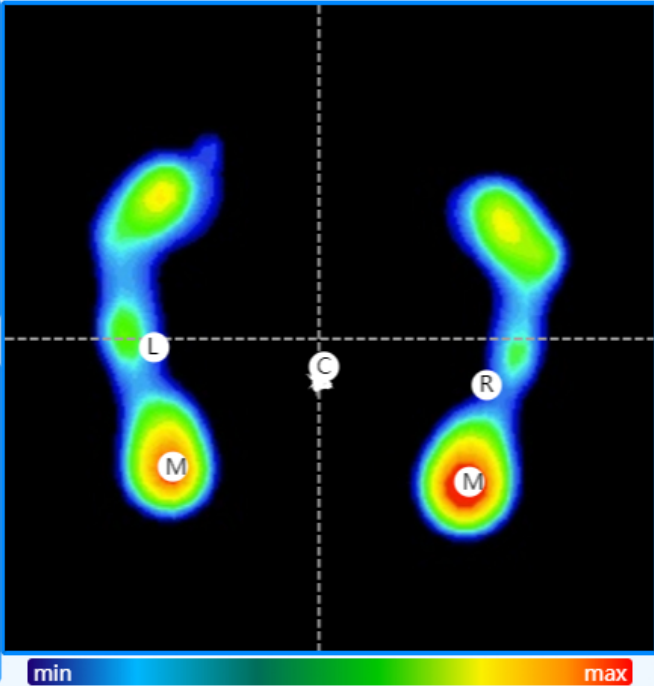

右脚

|            |      |
|------------|------|
| 面积【mm²】    | 6556 |
| 前/双足【%】    | 22   |
| 前/全足【%】    | 42   |
| 最大压强【gr/%】 | 206  |
| 平均压强【gr/%】 | 189  |

|            |      |
|------------|------|
| 面积【mm²】    | 5415 |
| 后/双足【%】    | 29   |
| 后/全足【%】    | 58   |
| 最大压强【gr/%】 | 321  |
| 平均压强【gr/%】 | 311  |

双脚综合数据

左脚总和

|            |       |
|------------|-------|
| 面积【mm²】    | 12941 |
| 负荷【%】      | 49    |
| 最大压强【gr/%】 | 226   |
| 平均压强【gr/%】 | 217   |

右脚总和

|            |       |
|------------|-------|
| 面积【mm²】    | 11971 |
| 负荷【%】      | 51    |
| 最大压强【gr/%】 | 255   |
| 平均压强【gr/%】 | 244   |

静态报告

陈明慧 18岁 女 70.0kg 175.0cm 2025-2-26 13:27:18



足弓类型

左脚

足弓指数 26.00%

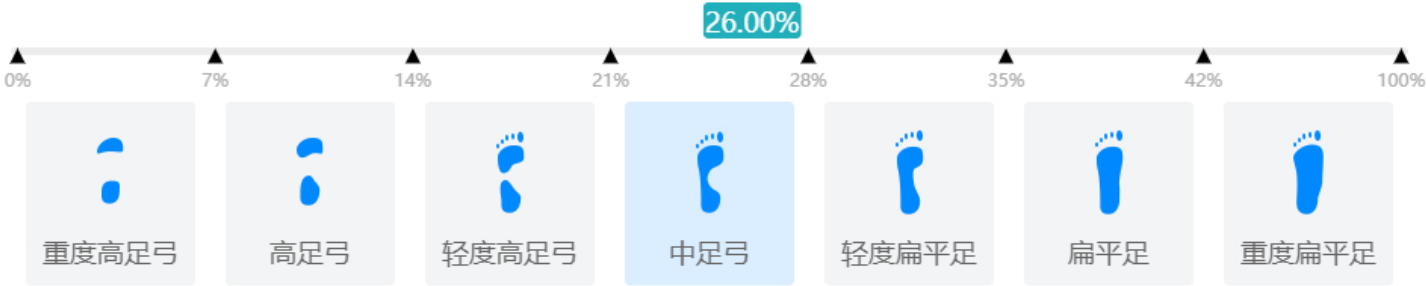

右脚

足弓指数 25.00%

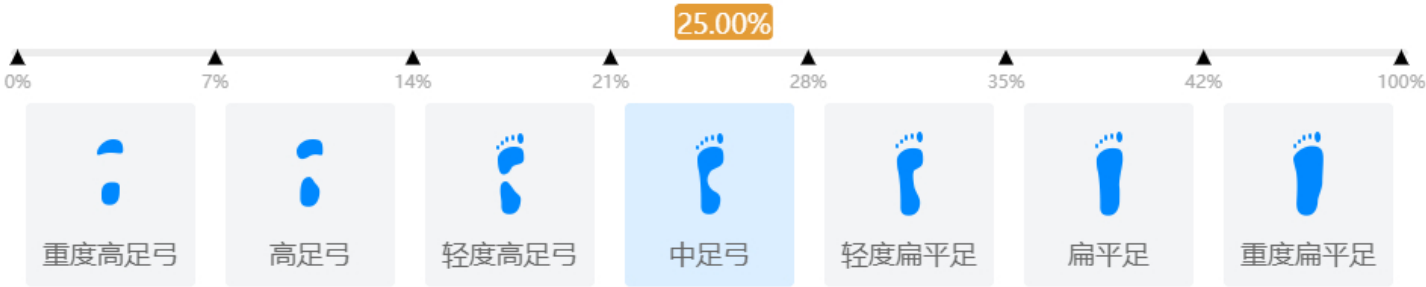

报告结论

左脚横弓塌陷  
右脚横弓塌陷  
身体重心过度靠后
