# Supplementary material for: Individualized Corrective Training Based on Precision Biomechanical Assessment for the Prevention of Sports Injuries in Adolescents
Source: Research Square preprint supplement (doi:10.21203/rs.3.rs-8426574/v1), 2026-02-02
Supplement: Supplementary file 247 [file 静态报告-韩雨坪-20250226145038.pdf › Plantar pressure and gait analysis/soccer/静态报告-韩雨坪-20250226145038.pdf]

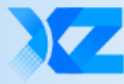

静态双脚数据

左脚

|            |      |
|------------|------|
| 面积【mm²】    | 5542 |
| 前/双足【%】    | 22   |
| 前/全足【%】    | 44   |
| 最大压强【gr/%】 | 183  |
| 平均压强【gr/%】 | 165  |

|            |      |
|------------|------|
| 面积【mm²】    | 4406 |
| 后/双足【%】    | 28   |
| 后/全足【%】    | 56   |
| 最大压强【gr/%】 | 271  |
| 平均压强【gr/%】 | 266  |

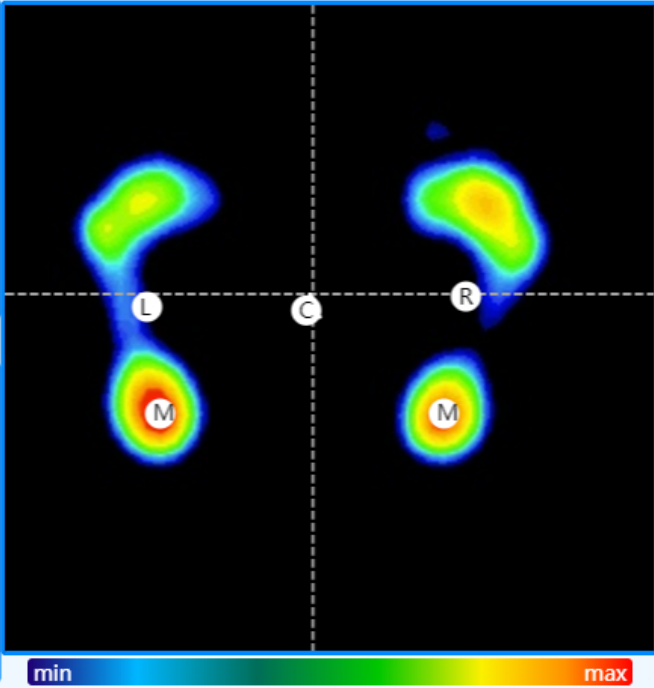

右脚

|            |      |
|------------|------|
| 面积【mm²】    | 6257 |
| 前/双足【%】    | 28   |
| 前/全足【%】    | 56   |
| 最大压强【gr/%】 | 207  |
| 平均压强【gr/%】 | 191  |

|            |      |
|------------|------|
| 面积【mm²】    | 4084 |
| 后/双足【%】    | 22   |
| 后/全足【%】    | 44   |
| 最大压强【gr/%】 | 240  |
| 平均压强【gr/%】 | 226  |

双脚综合数据

左脚总和

|            |      |
|------------|------|
| 面积【mm²】    | 9948 |
| 负荷【%】      | 50   |
| 最大压强【gr/%】 | 213  |
| 平均压强【gr/%】 | 209  |

右脚总和

|            |       |
|------------|-------|
| 面积【mm²】    | 10341 |
| 负荷【%】      | 50    |
| 最大压强【gr/%】 | 219   |
| 平均压强【gr/%】 | 205   |

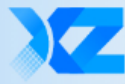

足弓类型

左脚

足弓指数 21.00%

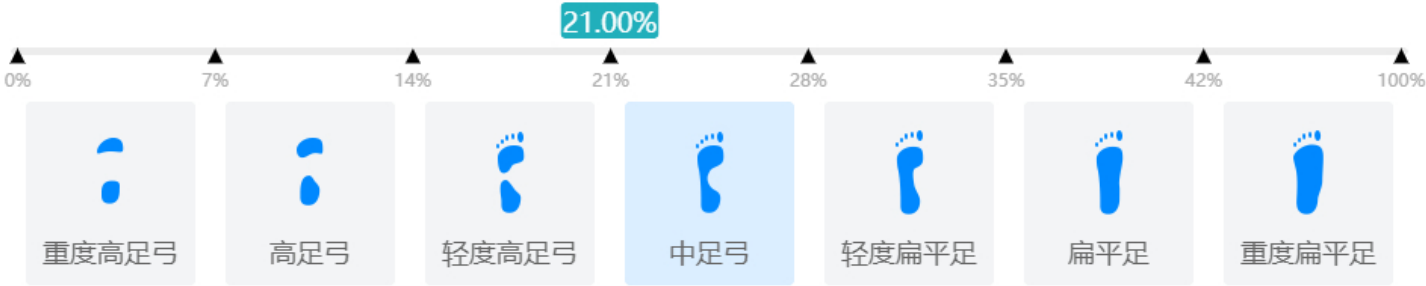

右脚

足弓指数 15.00%

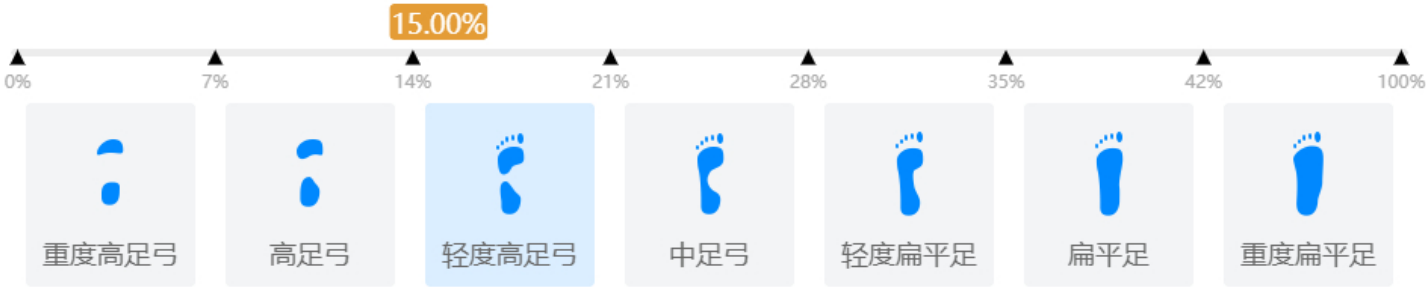

报告结论

左脚横弓塌陷  
右脚横弓塌陷  
右脚足弓偏高  
身体重心过度靠后
