# Supplementary material for: Individualized Corrective Training Based on Precision Biomechanical Assessment for the Prevention of Sports Injuries in Adolescents
Source: Research Square preprint supplement (doi:10.21203/rs.3.rs-8426574/v1), 2026-02-02
Supplement: Supplementary file 248 [file 静态报告-魏雨虹-20250226123119.pdf › Plantar pressure and gait analysis/soccer/静态报告-魏雨虹-20250226123119.pdf]

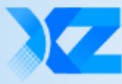

静态双脚数据

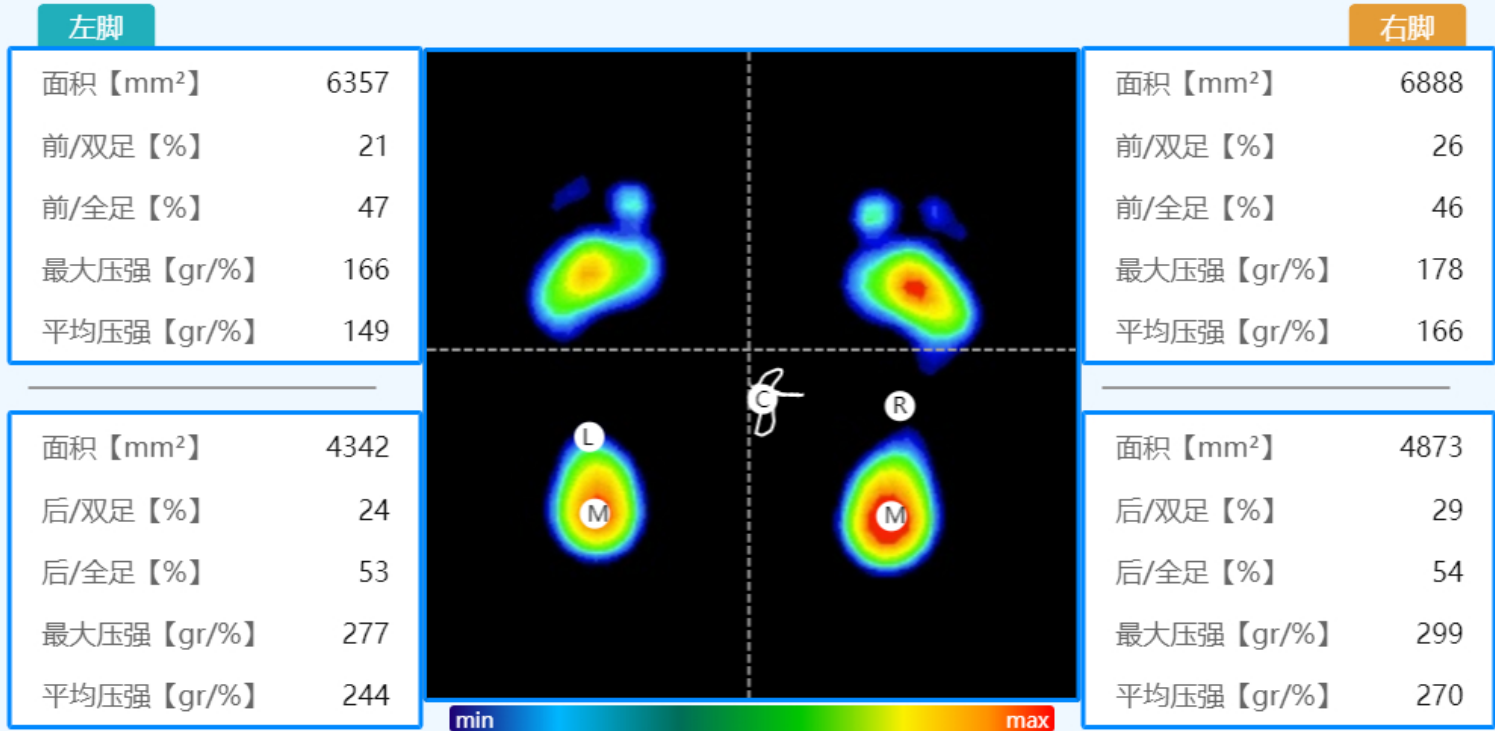

双脚综合数据

| 左脚总和                 |       | 右脚总和                 |       |
|----------------------|-------|----------------------|-------|
| 面积【mm <sup>2</sup> 】 | 10699 | 面积【mm <sup>2</sup> 】 | 11761 |
| 负荷【%】                | 45    | 负荷【%】                | 55    |
| 最大压强【gr/%】           | 220   | 最大压强【gr/%】           | 233   |
| 平均压强【gr/%】           | 188   | 平均压强【gr/%】           | 209   |



足弓类型

左脚

足弓指数 6.00%

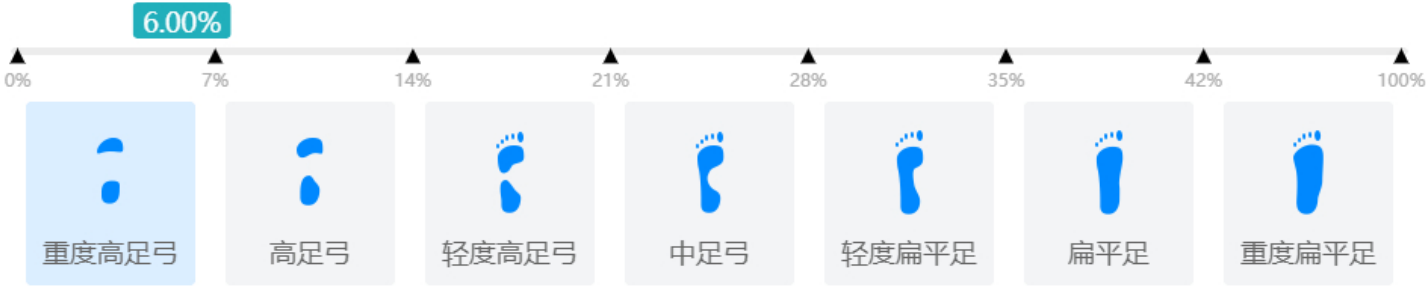

右脚

足弓指数 10.00%

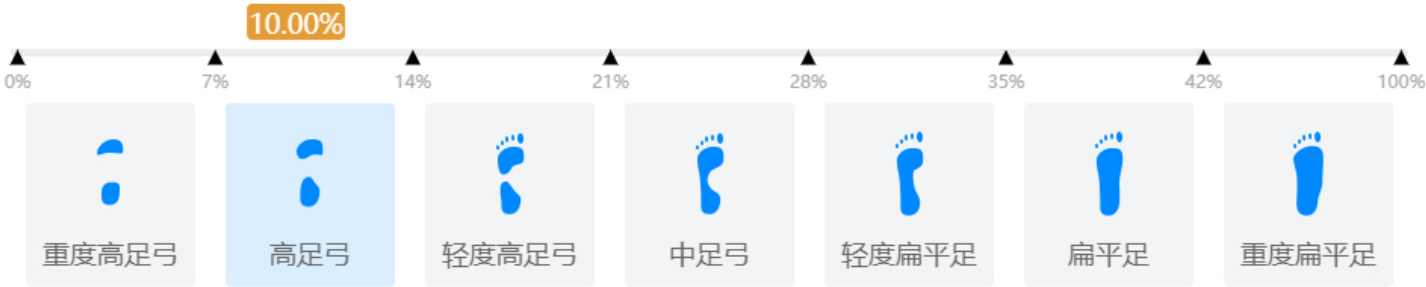

报告结论

左脚横弓塌陷  
左脚足弓过高  
右脚横弓塌陷  
右脚足弓过高  
身体重心过度靠后  
左右侧足弓形状压力差异较大
