# Supplementary material for: Individualized Corrective Training Based on Precision Biomechanical Assessment for the Prevention of Sports Injuries in Adolescents
Source: Research Square preprint supplement (doi:10.21203/rs.3.rs-8426574/v1), 2026-02-02
Supplement: Supplementary file 250 [file 静态报告-齐家树-20250304095205.pdf › Plantar pressure and gait analysis/soccer/静态报告-齐家树-20250304095205.pdf]

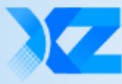

静态双脚数据

左脚

|            |      |
|------------|------|
| 面积【mm²】    | 7812 |
| 前/双足【%】    | 22   |
| 前/全足【%】    | 48   |
| 最大压强【gr/%】 | 185  |
| 平均压强【gr/%】 | 167  |

|            |      |
|------------|------|
| 面积【mm²】    | 6210 |
| 后/双足【%】    | 24   |
| 后/全足【%】    | 52   |
| 最大压强【gr/%】 | 256  |
| 平均压强【gr/%】 | 230  |

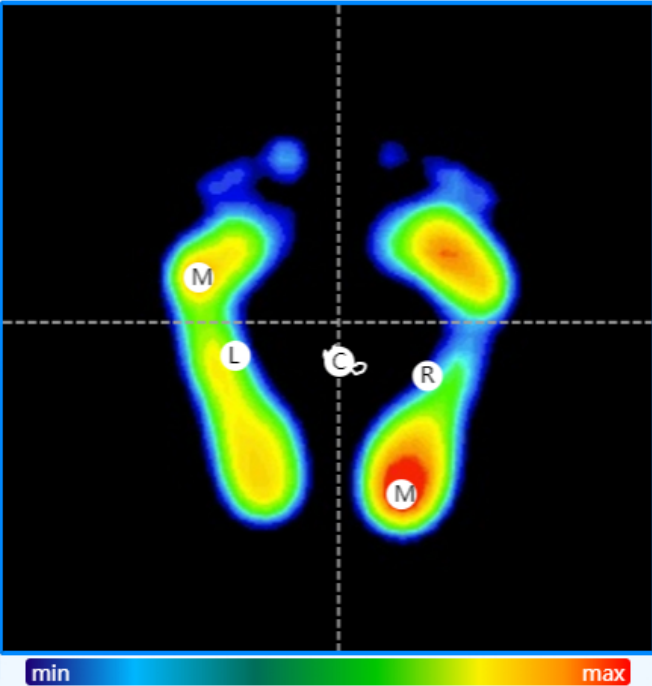

右脚

|            |      |
|------------|------|
| 面积【mm²】    | 8219 |
| 前/双足【%】    | 25   |
| 前/全足【%】    | 47   |
| 最大压强【gr/%】 | 198  |
| 平均压强【gr/%】 | 182  |

|            |      |
|------------|------|
| 面积【mm²】    | 6309 |
| 后/双足【%】    | 28   |
| 后/全足【%】    | 53   |
| 最大压强【gr/%】 | 306  |
| 平均压强【gr/%】 | 266  |

双脚综合数据

左脚总和

|            |       |
|------------|-------|
| 面积【mm²】    | 14022 |
| 负荷【%】      | 46    |
| 最大压强【gr/%】 | 216   |
| 平均压强【gr/%】 | 195   |

右脚总和

|            |       |
|------------|-------|
| 面积【mm²】    | 14529 |
| 负荷【%】      | 54    |
| 最大压强【gr/%】 | 251   |
| 平均压强【gr/%】 | 218   |

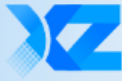

足弓类型

左脚

足弓指数 26.00%

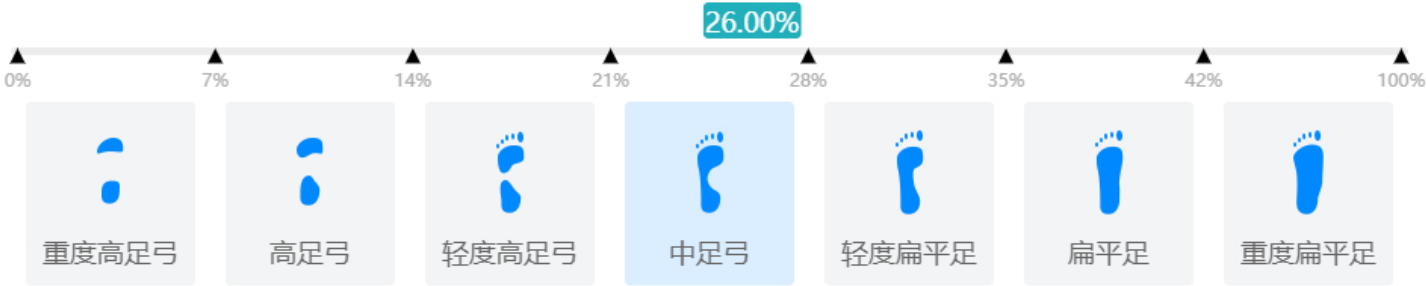

右脚

足弓指数 24.00%

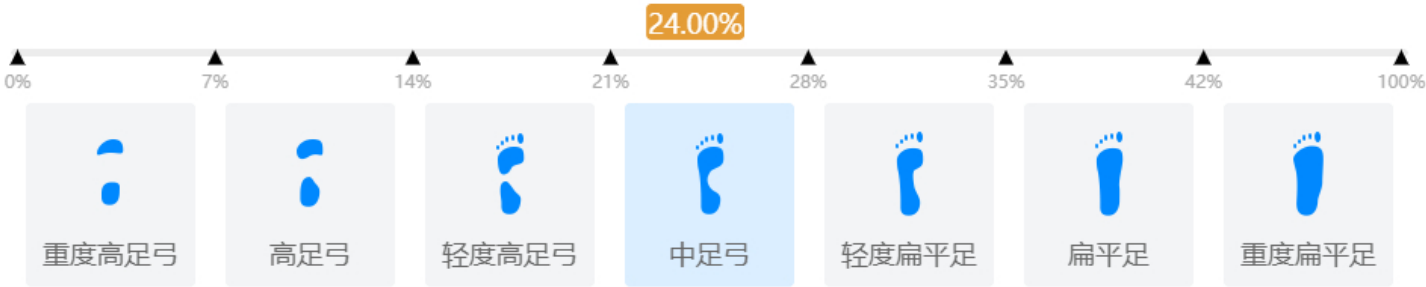

报告结论

左脚前足轻度内翻  
右脚横弓塌陷  
身体重心过度靠后
