# Supplementary figures and images for: Individualized Corrective Training Based on Precision Biomechanical Assessment for the Prevention of Sports Injuries in Adolescents
Source: Research Square preprint supplement (doi:10.21203/rs.3.rs-8426574/v1), 2026-02-02

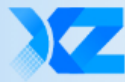

双脚重心变化

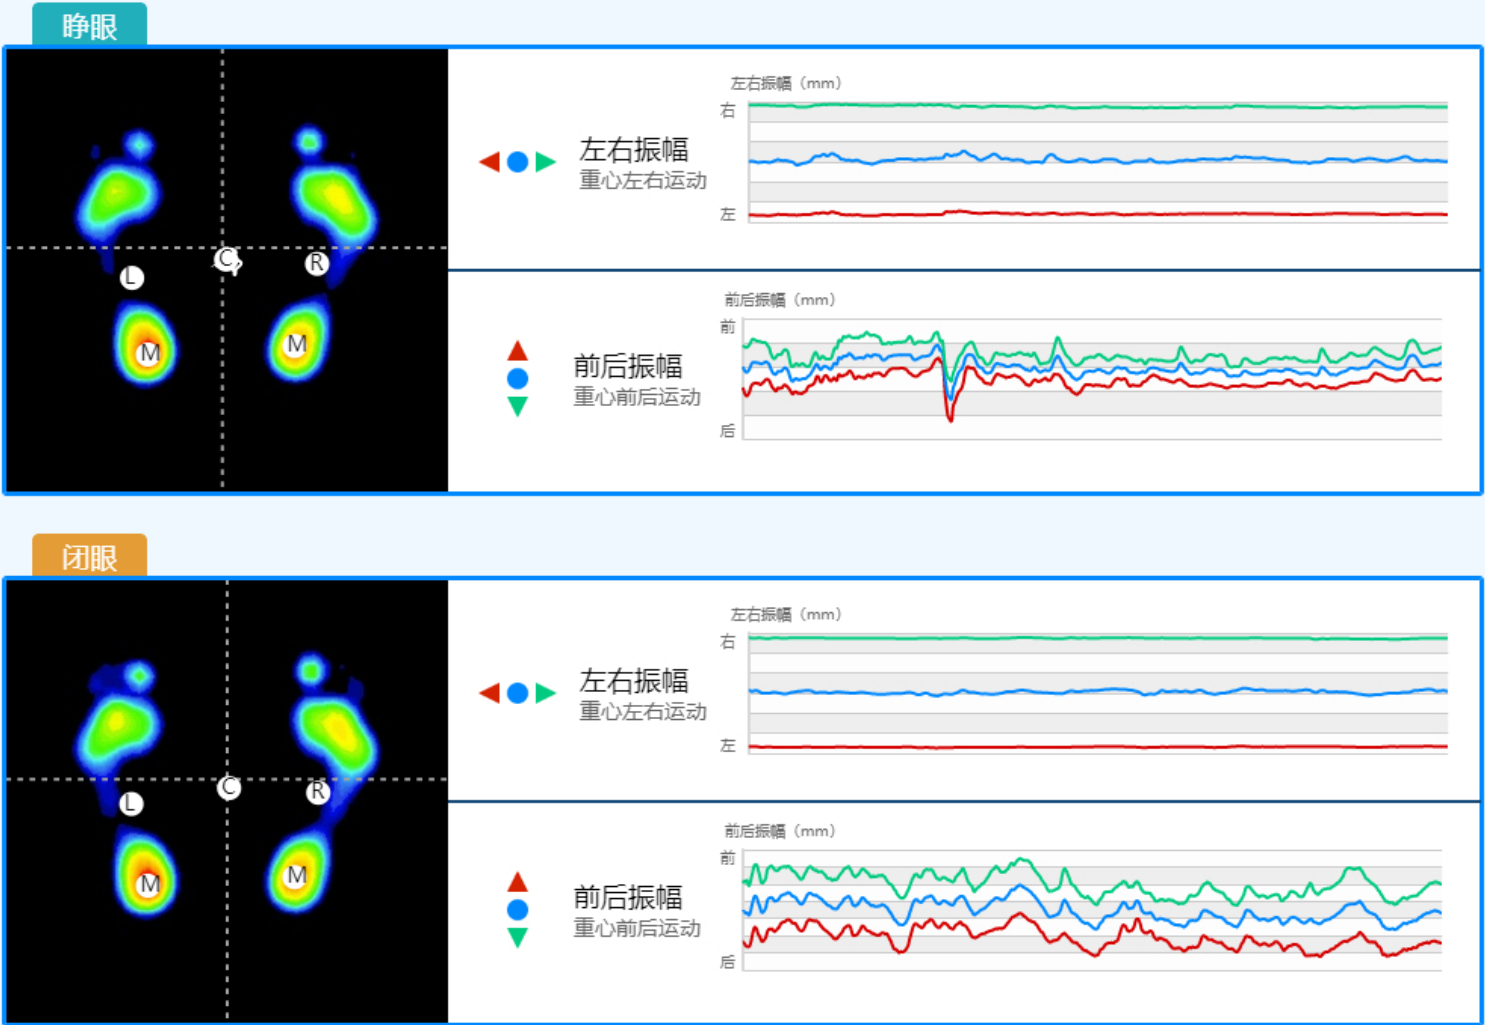

平衡报告

冯晨一 20岁 女 48.0kg 161.0cm 2025-2-26 10:14:20

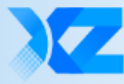

报告结论

睁眼  
左右晃动比前后晃动更明显  
闭眼  
左右晃动比前后晃动更明显

Supplement: Supplementary file 22 [file 平衡报告-冯晨一-20250226101529.pdf › Plantar pressure and gait analysis/aerobics /平衡报告-冯晨一-20250226101529.pdf]



双脚重心变化

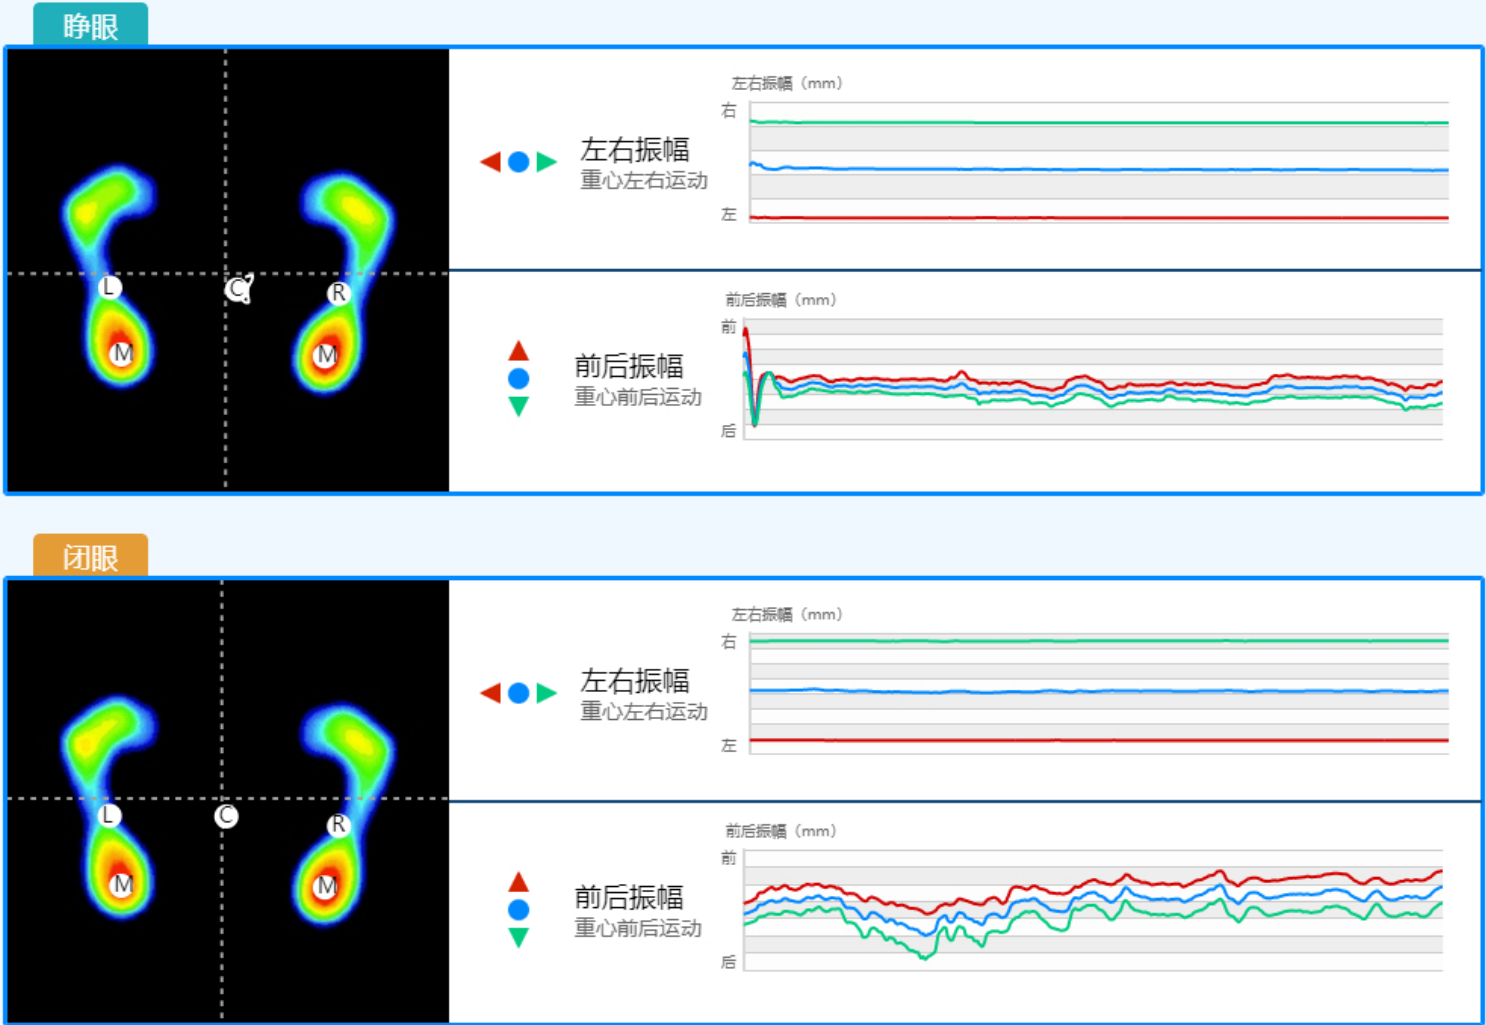

Cop数据

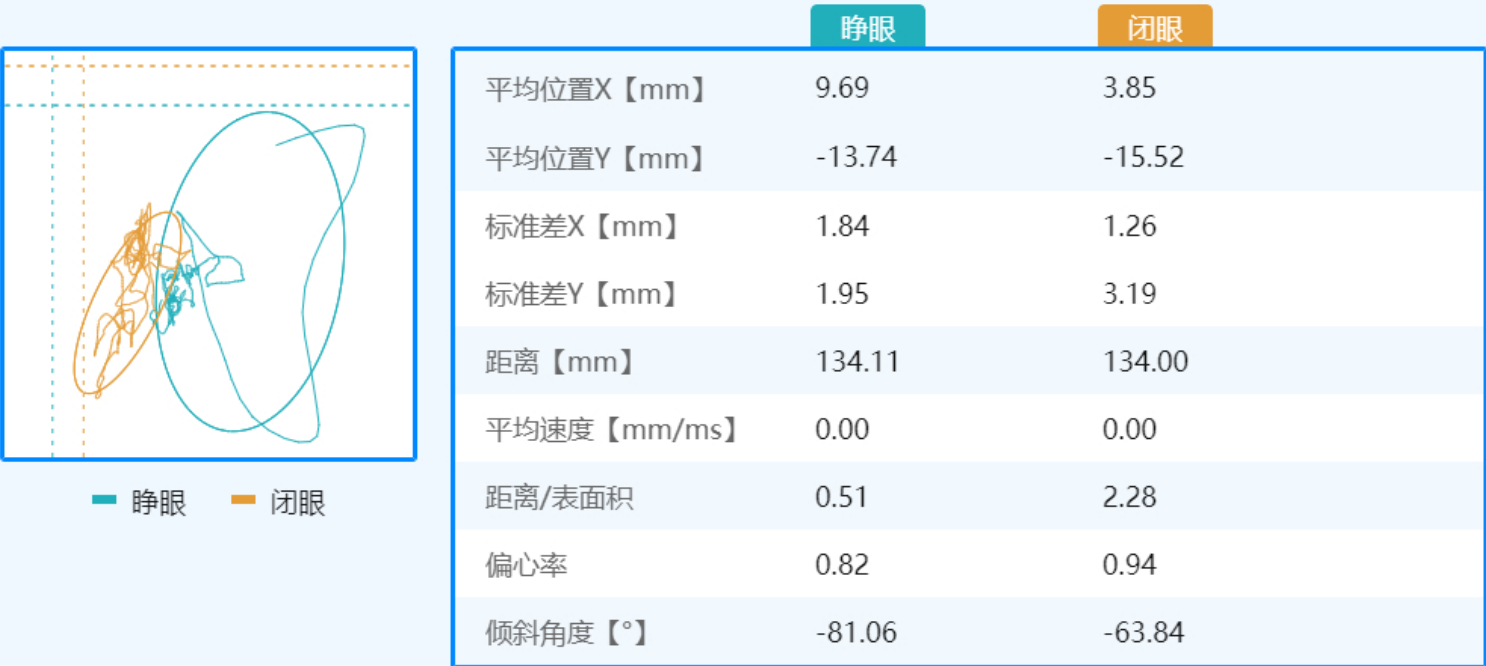

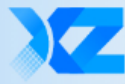

报告结论

睁眼  
前后晃动比左右晃动更明显  
闭眼  
前后晃动比左右晃动更明显

Supplement: Supplementary file 24 [file 平衡报告-周敏-20250226100338.pdf › Plantar pressure and gait analysis/aerobics /平衡报告-周敏-20250226100338.pdf]

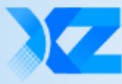

双脚重心变化

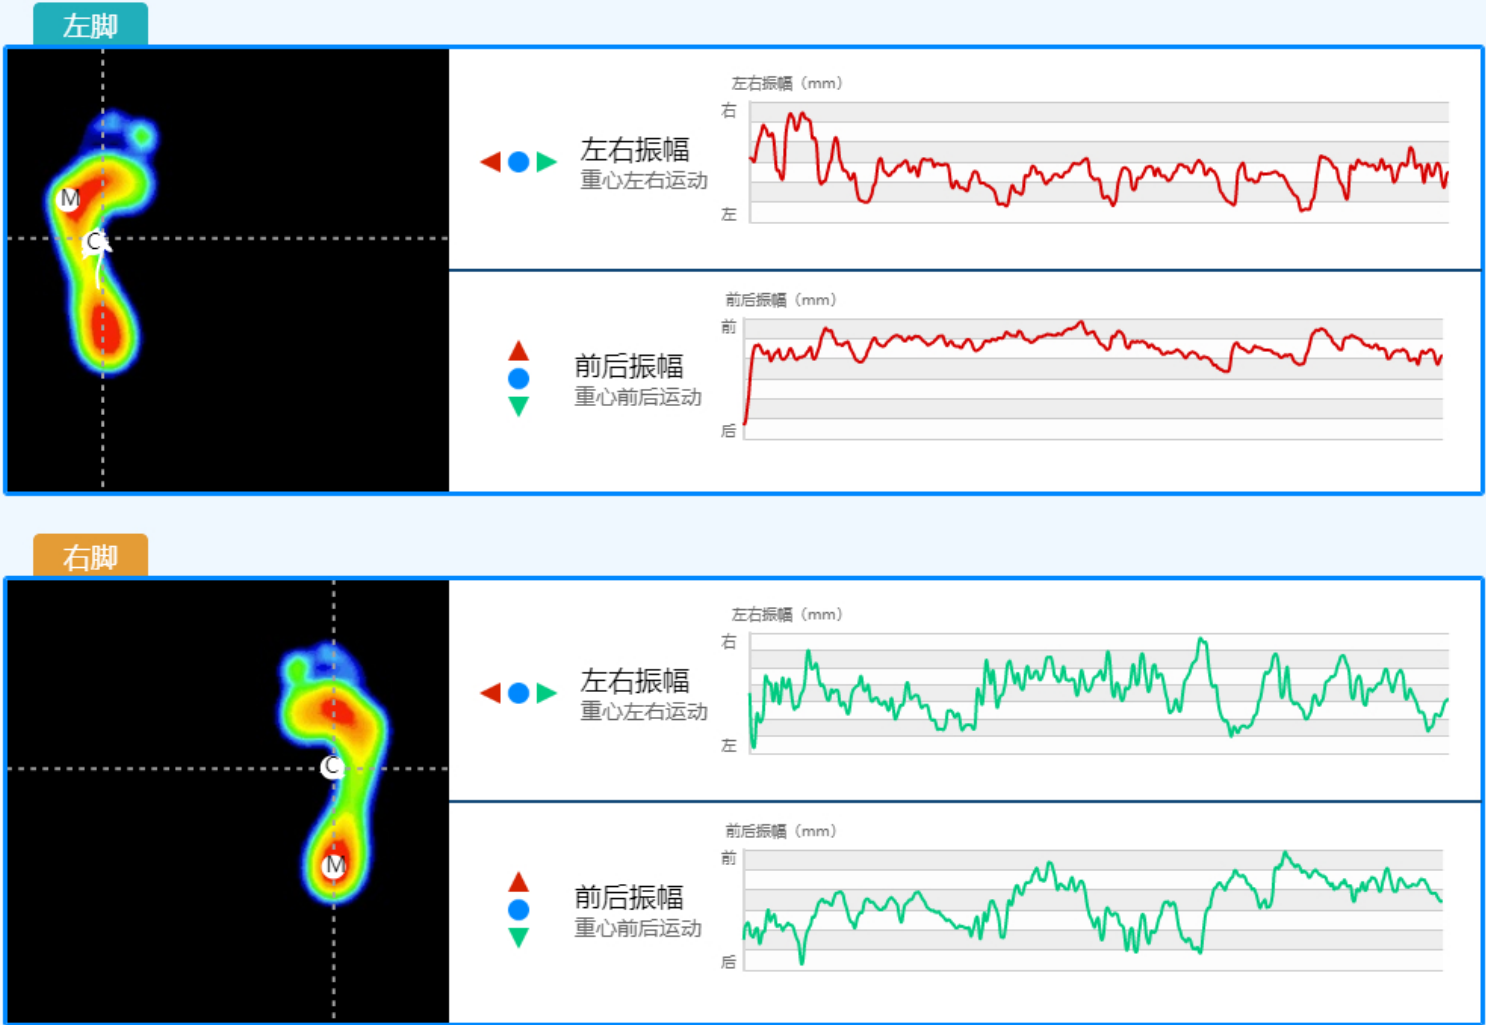

Cop数据

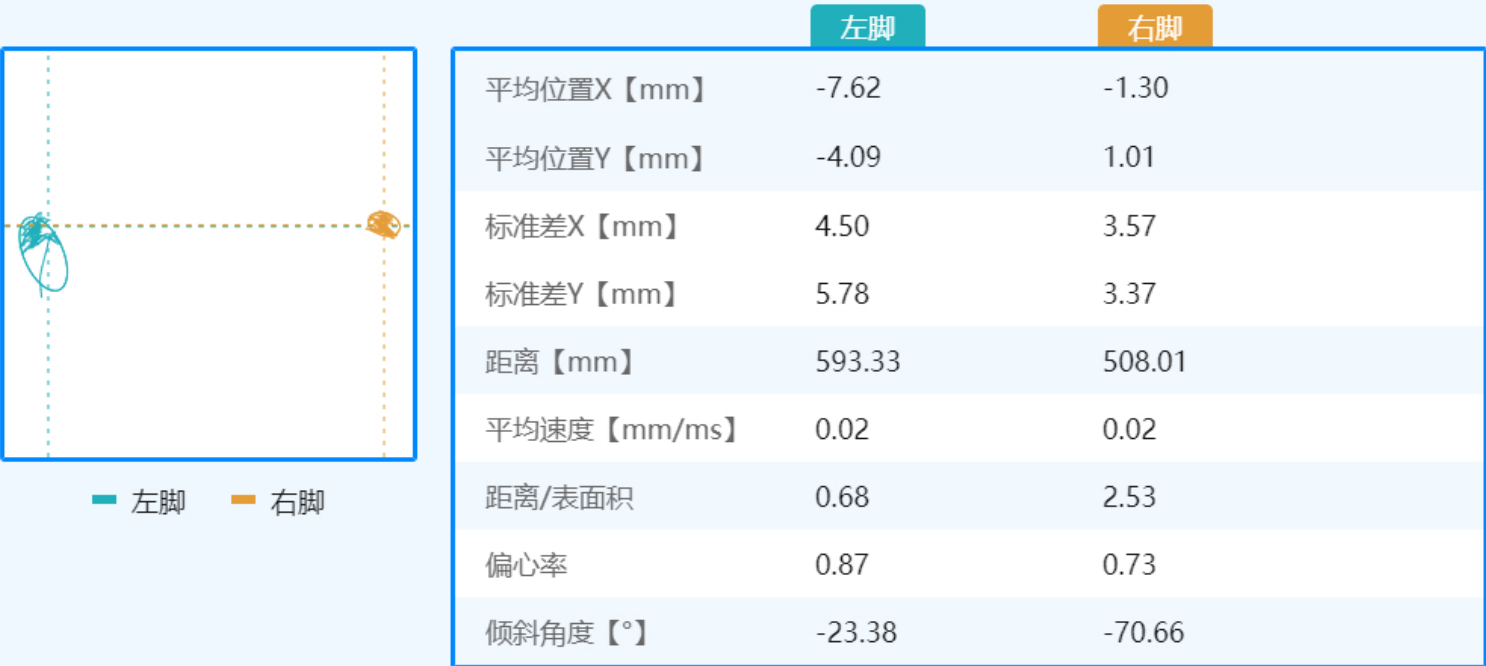

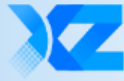

报告结论

睁眼  
左右晃动比前后晃动更明显

Supplement: Supplementary file 25 [file 平衡报告-周敏-20250226100511.pdf › Plantar pressure and gait analysis/aerobics /平衡报告-周敏-20250226100511.pdf]



双脚重心变化

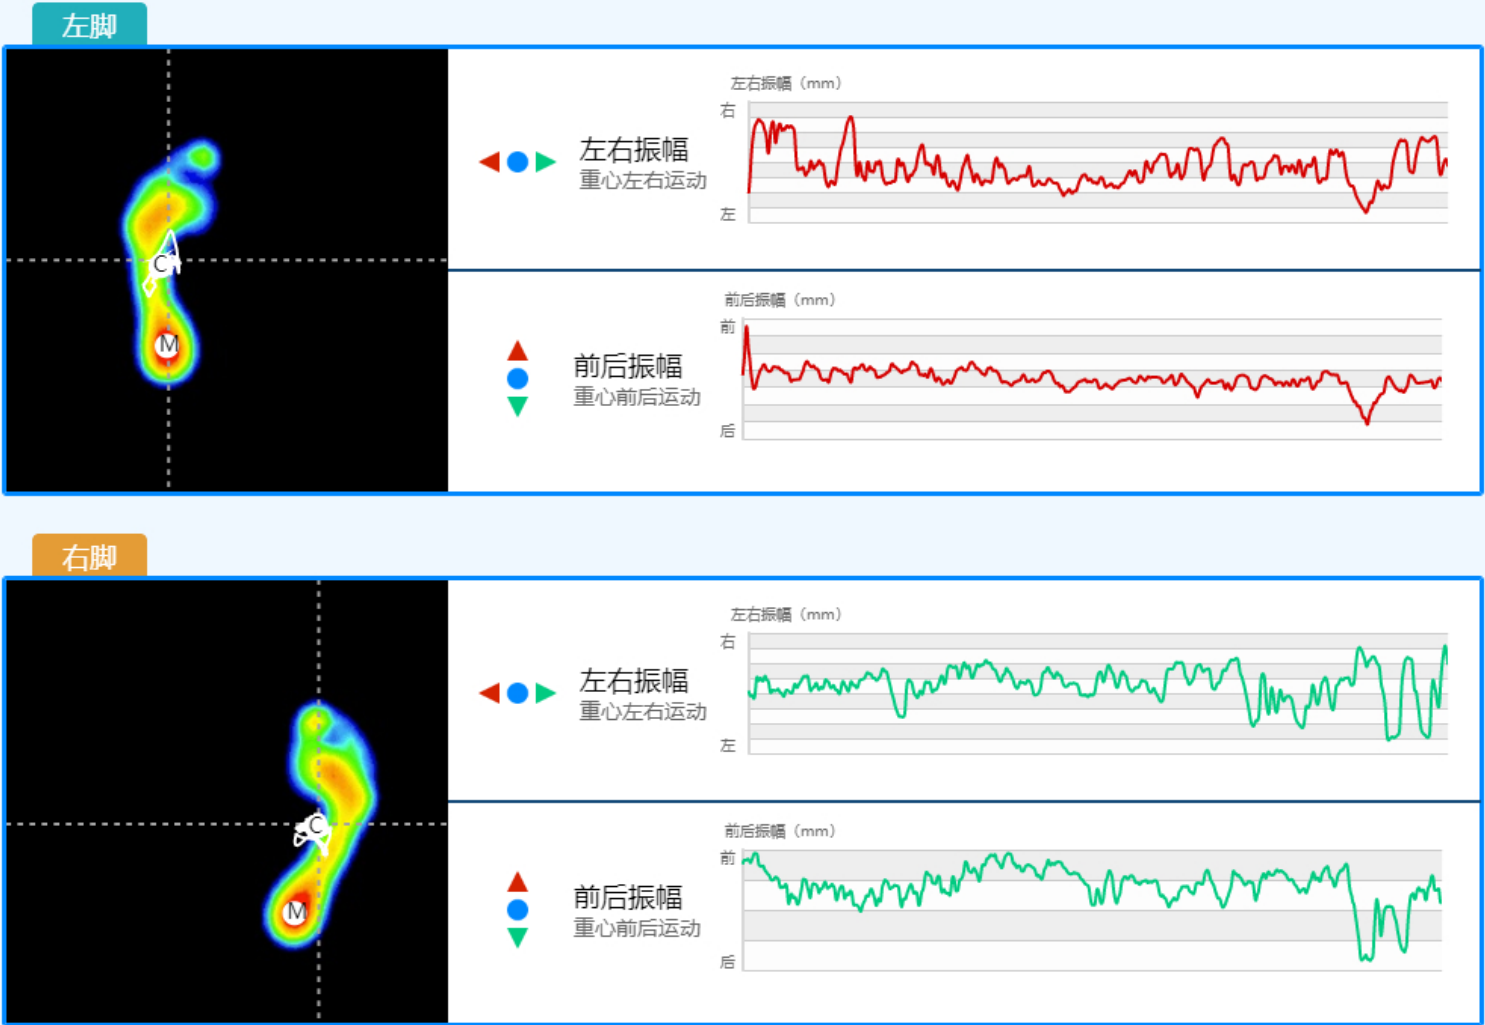

Cop数据

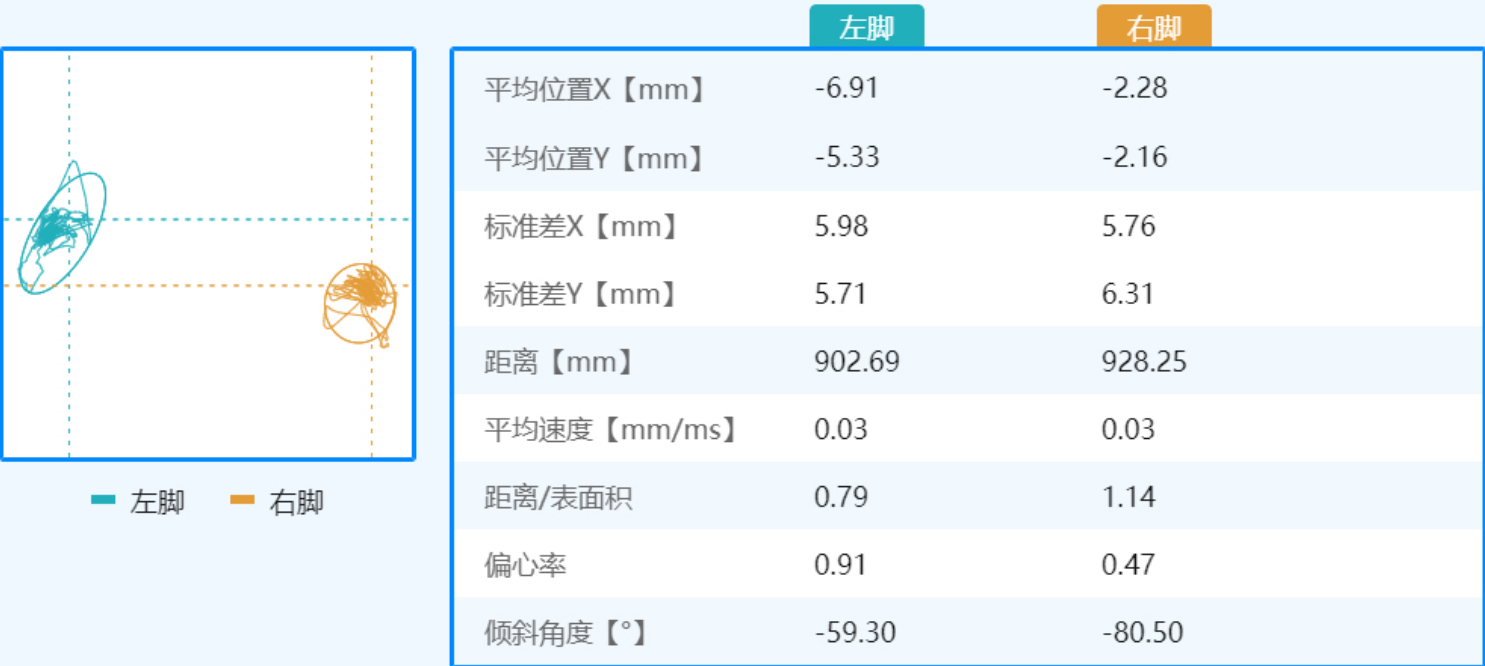

# 平衡报告

孙微珊 19岁 女 56.0kg 164.0cm 2025-2-26 16:29:47

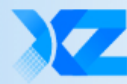

## 报告结论

睁眼  
左右振幅大于参考值  
前后振幅大于参考值  
前后晃动比左右晃动更明显

Supplement: Supplementary file 26 [file 平衡报告-孙微珊-20250226164557.pdf › Plantar pressure and gait analysis/aerobics /平衡报告-孙微珊-20250226164557.pdf]



双脚重心变化

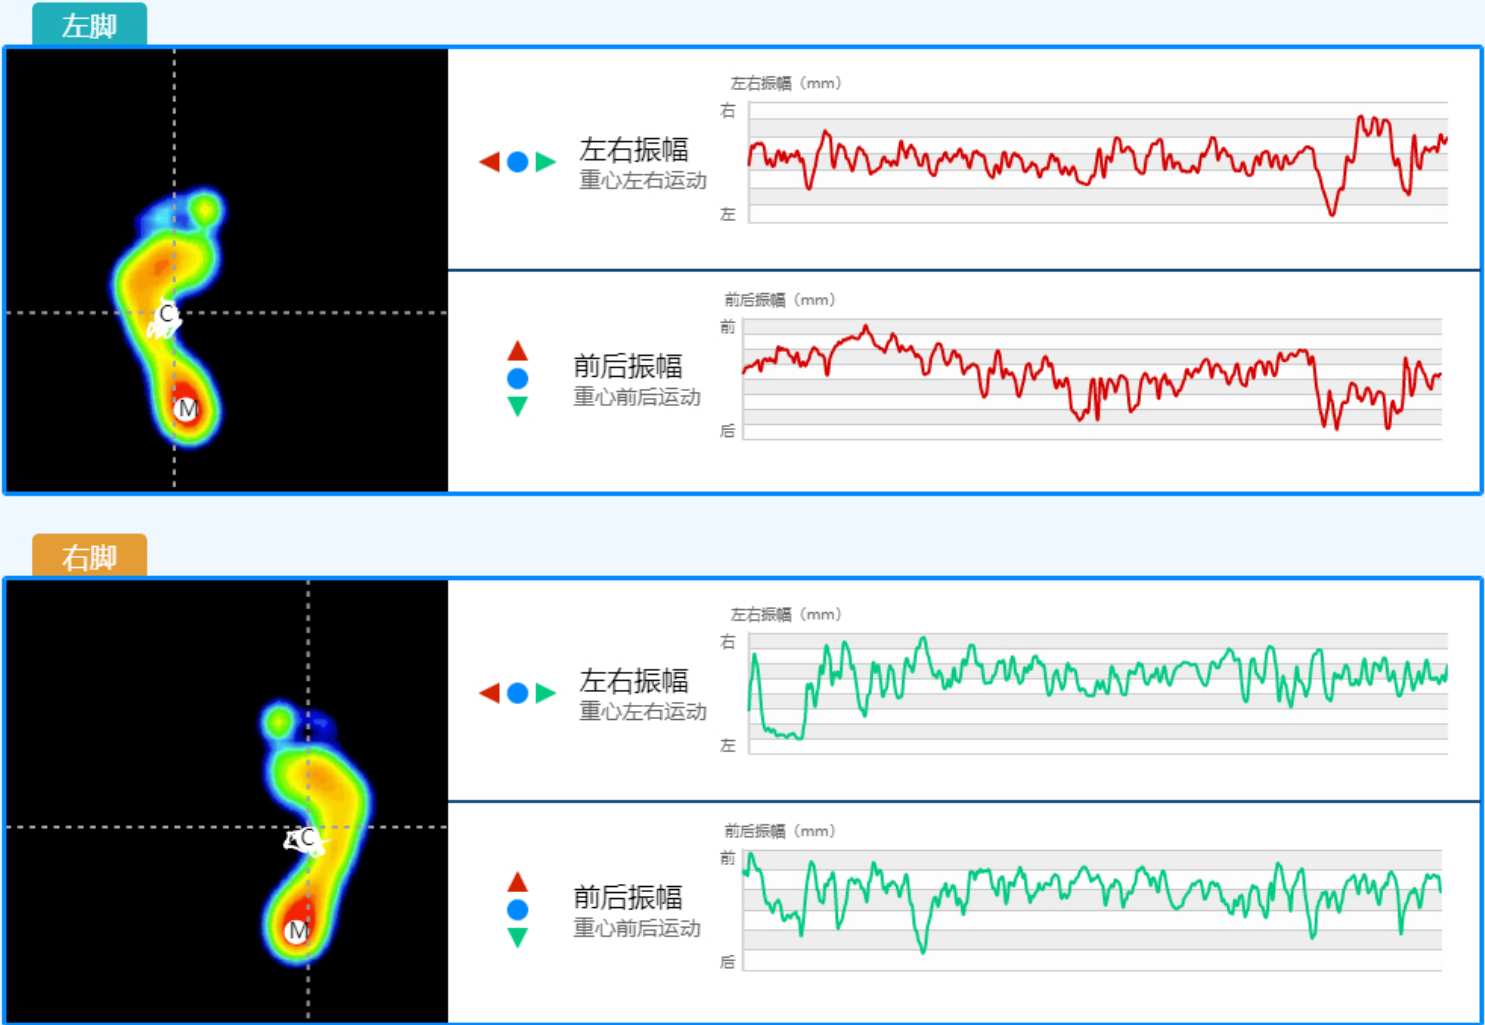

Cop数据

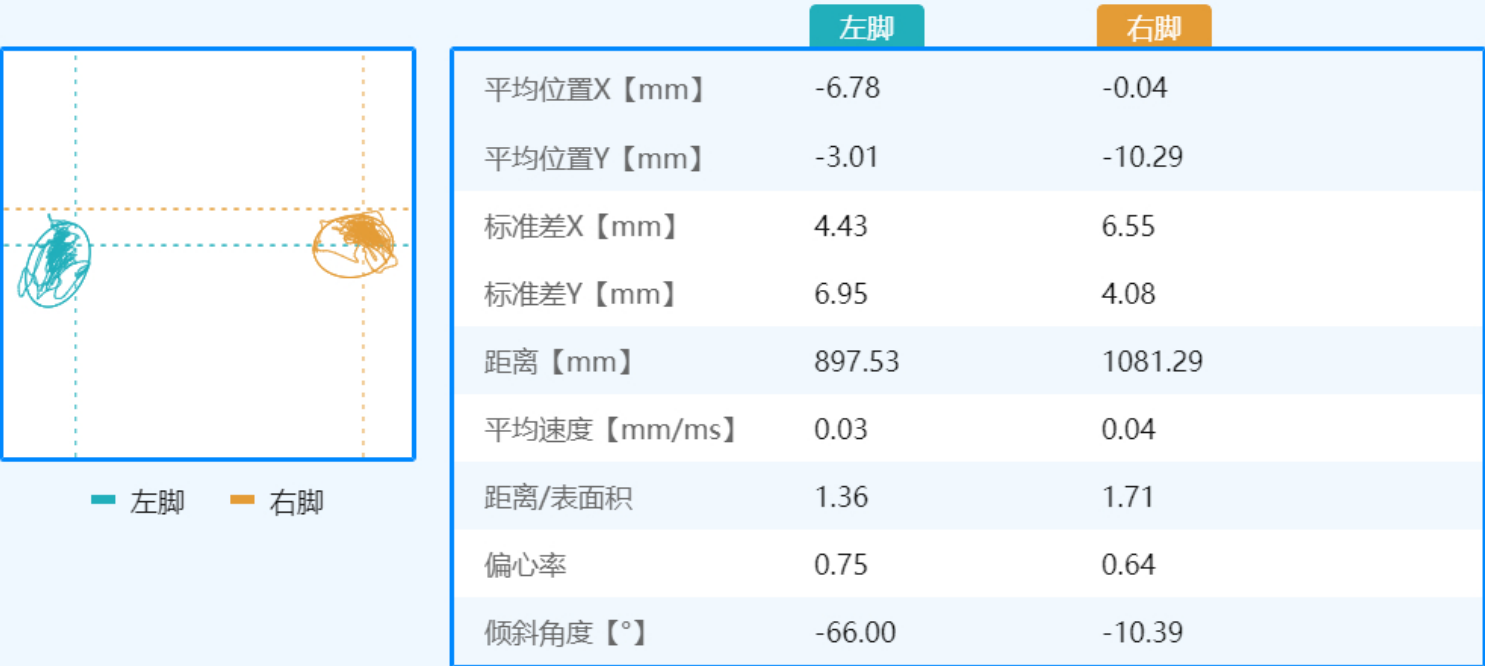

# 平衡报告

智豪龙 20岁 男 70.0kg 167.0cm 2025-2-26 16:03:26



## 报告结论

睁眼  
左右振幅大于参考值  
左右晃动比前后晃动更明显

Supplement: Supplementary file 34 [file 平衡报告-智豪龙-20250226165224.pdf › Plantar pressure and gait analysis/aerobics /平衡报告-智豪龙-20250226165224.pdf]

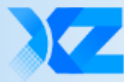

双脚重心变化

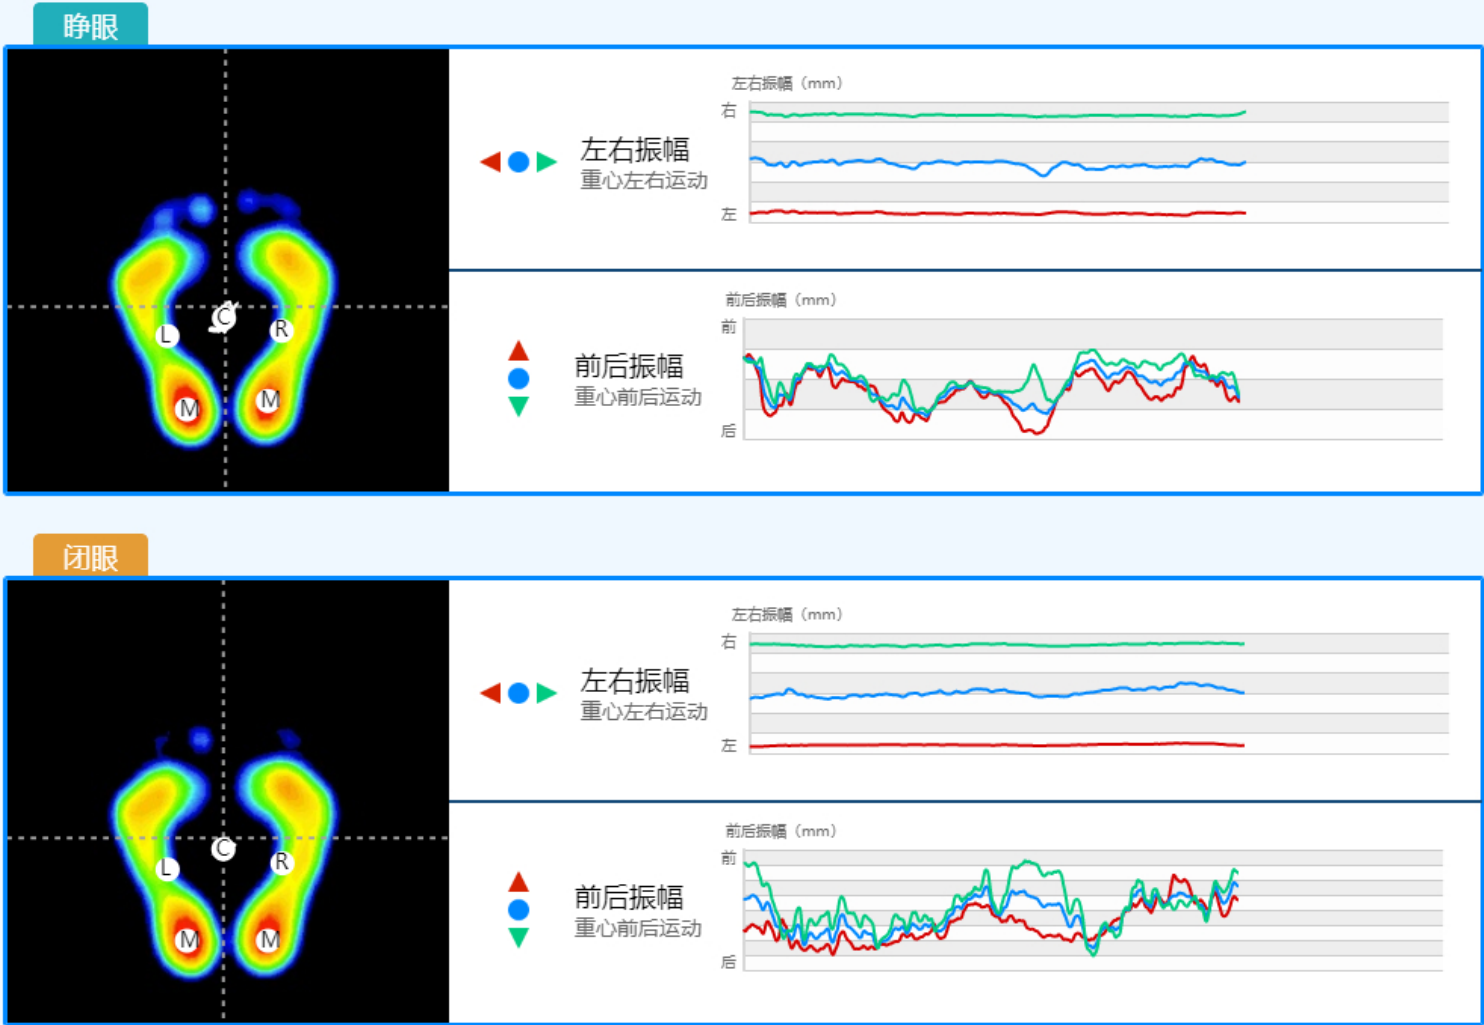

Cop数据

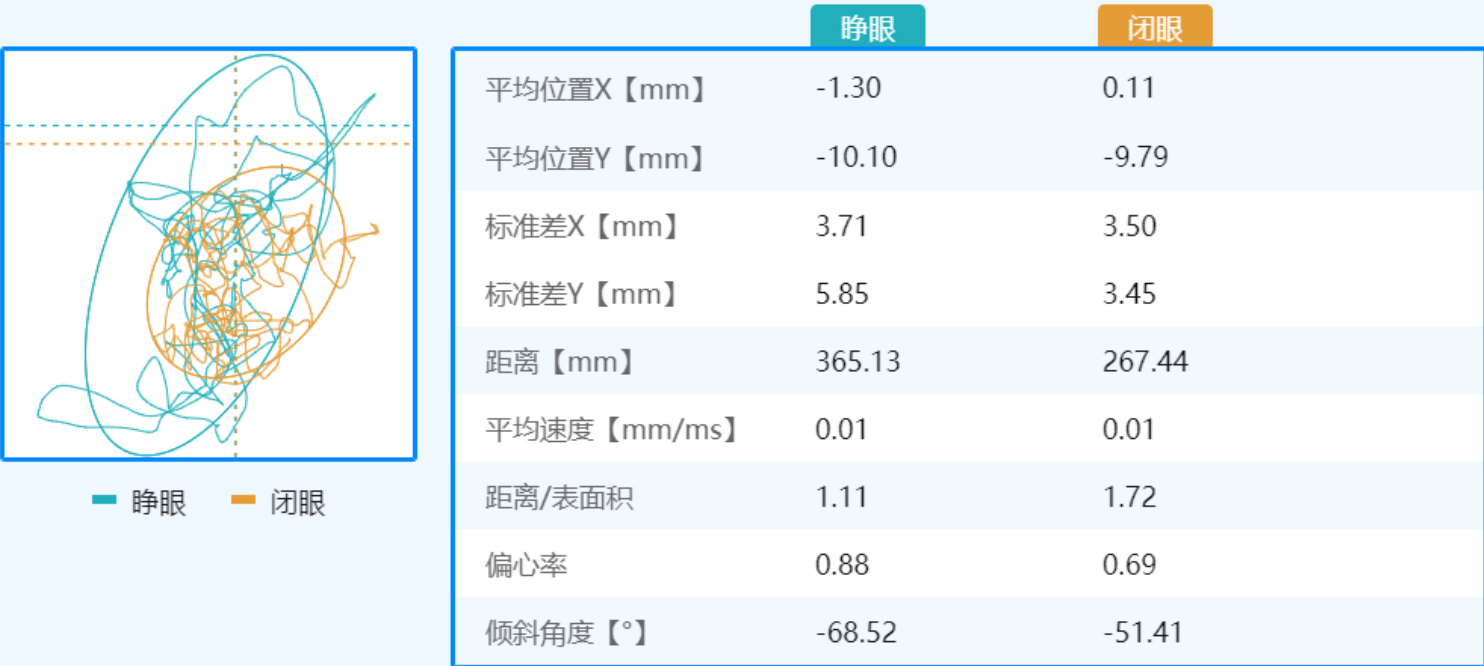

# 平衡报告

智豪龙 20岁 男 70.0kg 167.0cm 2025-2-26 16:02:07



## 报告结论

睁眼  
前后振幅大于参考值  
前后晃动比左右晃动更明显  
闭眼  
左右晃动比前后晃动更明显

Supplement: Supplementary file 35 [file 平衡报告-智豪龙-20250226165233.pdf › Plantar pressure and gait analysis/aerobics /平衡报告-智豪龙-20250226165233.pdf]



双脚重心变化

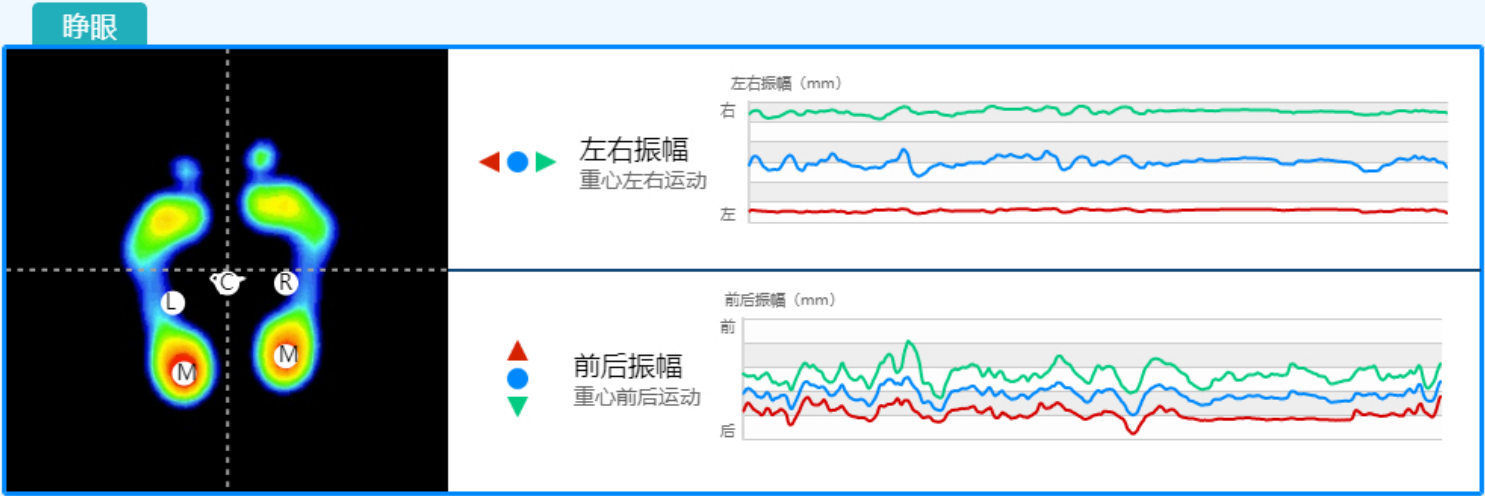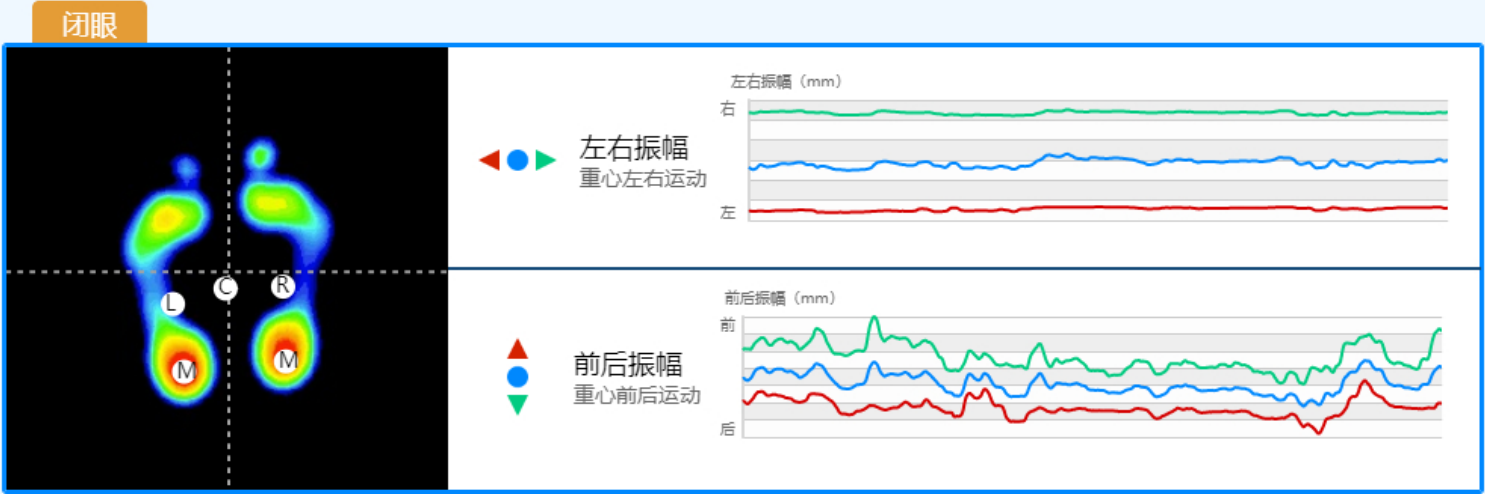

Cop数据

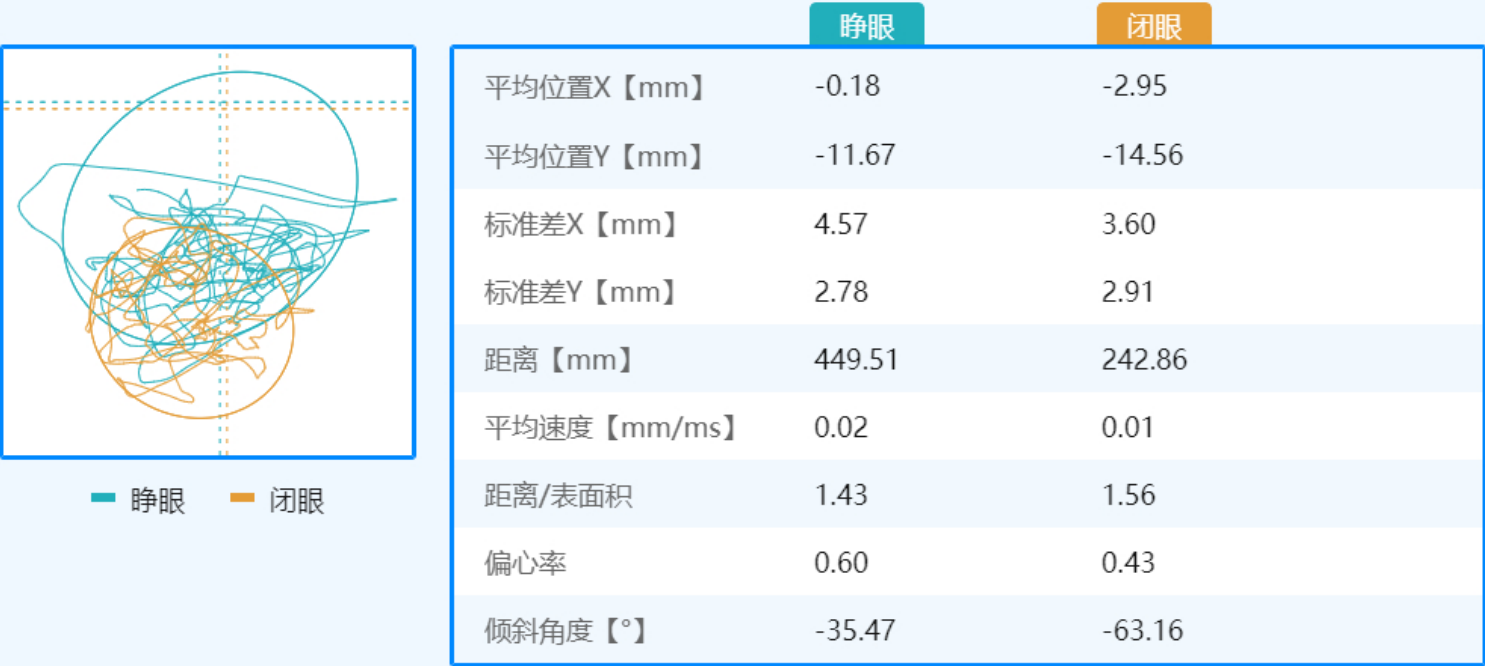

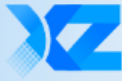

报告结论

睁眼  
左右晃动比前后晃动更明显  
闭眼  
左右晃动比前后晃动更明显

Supplement: Supplementary file 39 [file 平衡报告-段瑶-20250226164745.pdf › Plantar pressure and gait analysis/aerobics /平衡报告-段瑶-20250226164745.pdf]



双脚重心变化

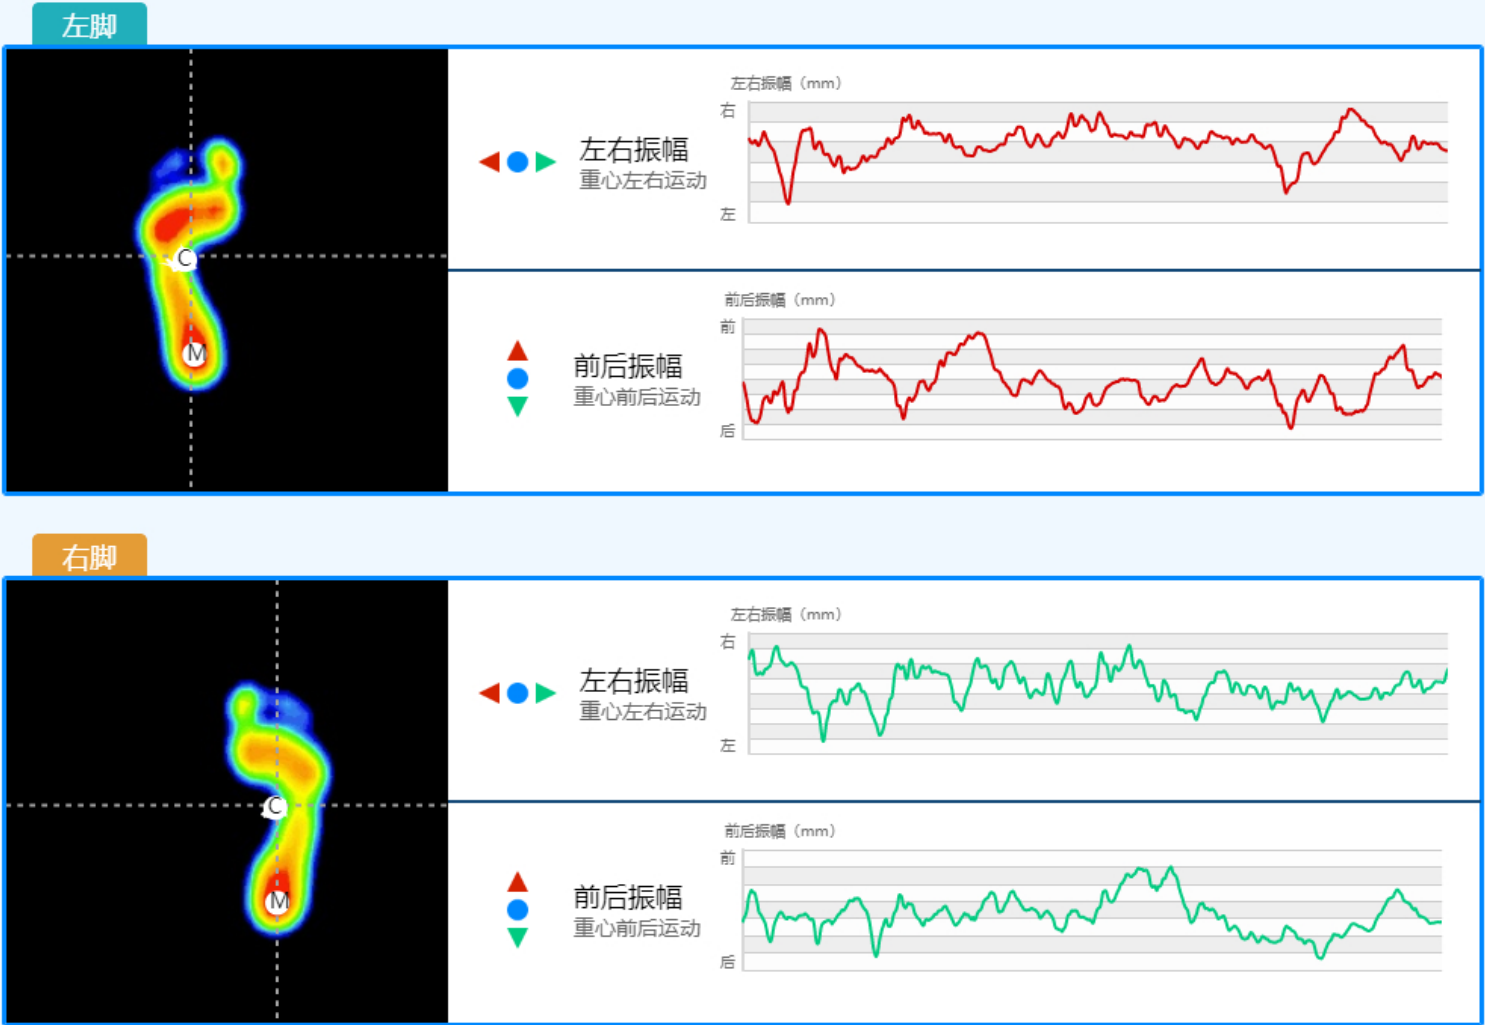



报告结论

睁眼  
左右晃动比前后晃动更明显

Supplement: Supplementary file 40 [file 平衡报告-温欢-20250226165114.pdf › Plantar pressure and gait analysis/aerobics /平衡报告-温欢-20250226165114.pdf]



双脚重心变化

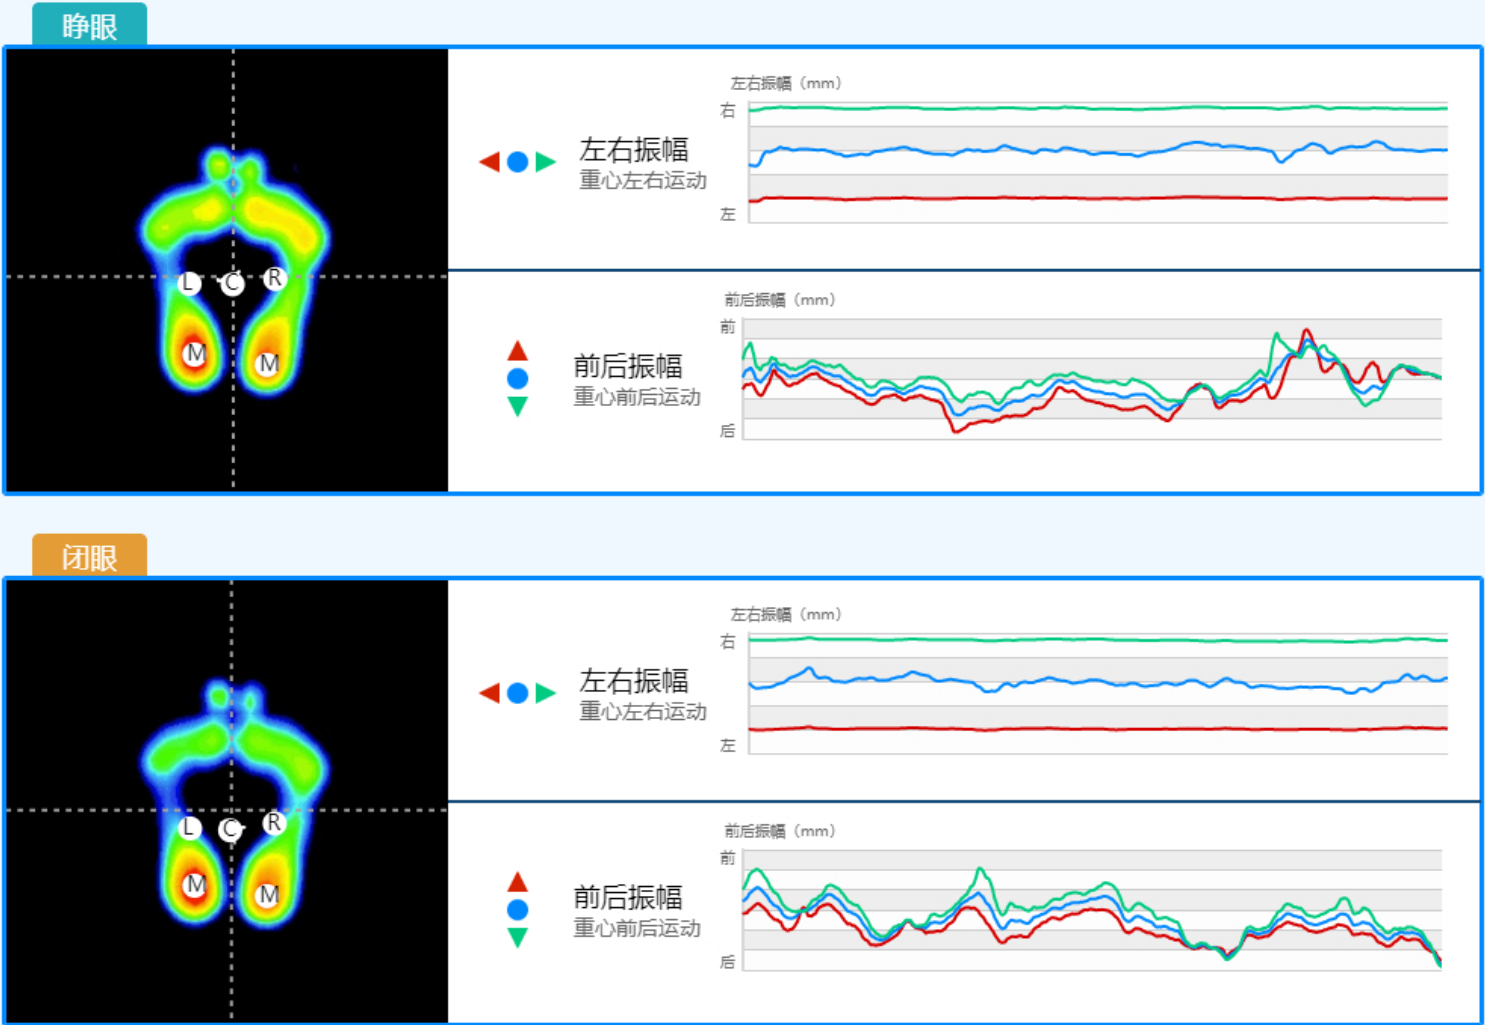

Cop数据

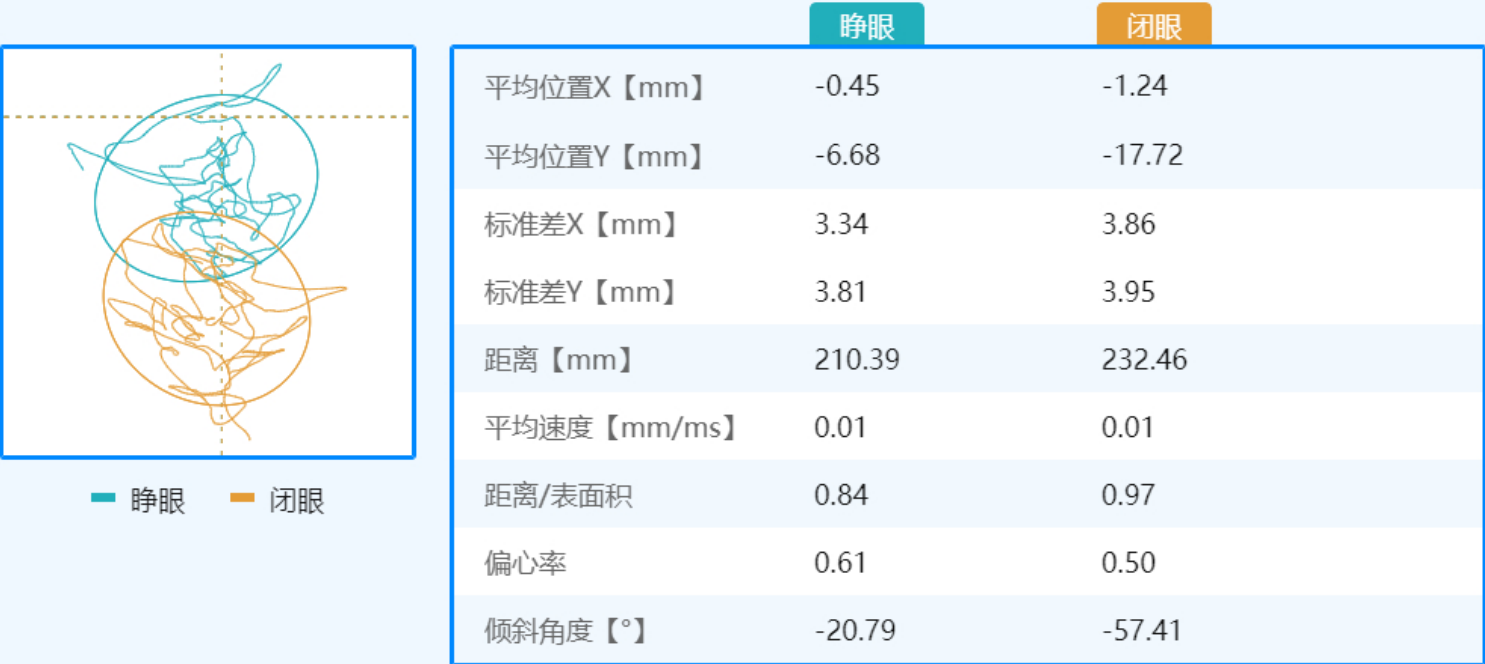

平衡报告

温欢 20岁 女 45.0kg 153.0cm 2025-2-26 16:07:23



报告结论

睁眼  
前后晃动比左右晃动更明显  
闭眼  
前后晃动比左右晃动更明显

Supplement: Supplementary file 41 [file 平衡报告-温欢-20250226165125.pdf › Plantar pressure and gait analysis/aerobics /平衡报告-温欢-20250226165125.pdf]



双脚重心变化

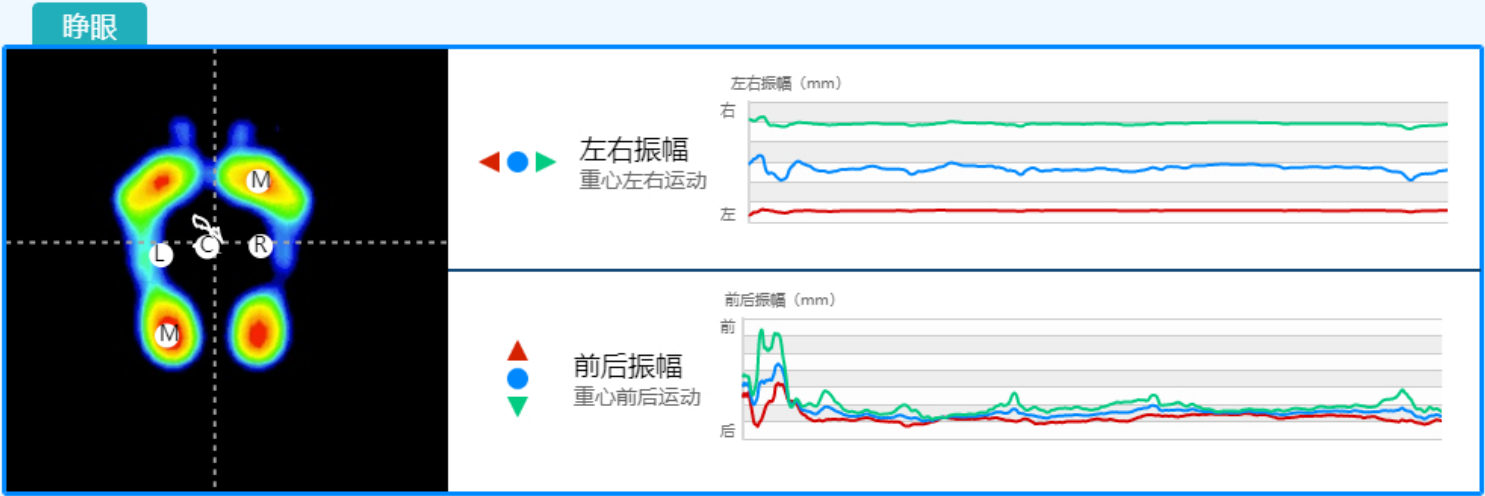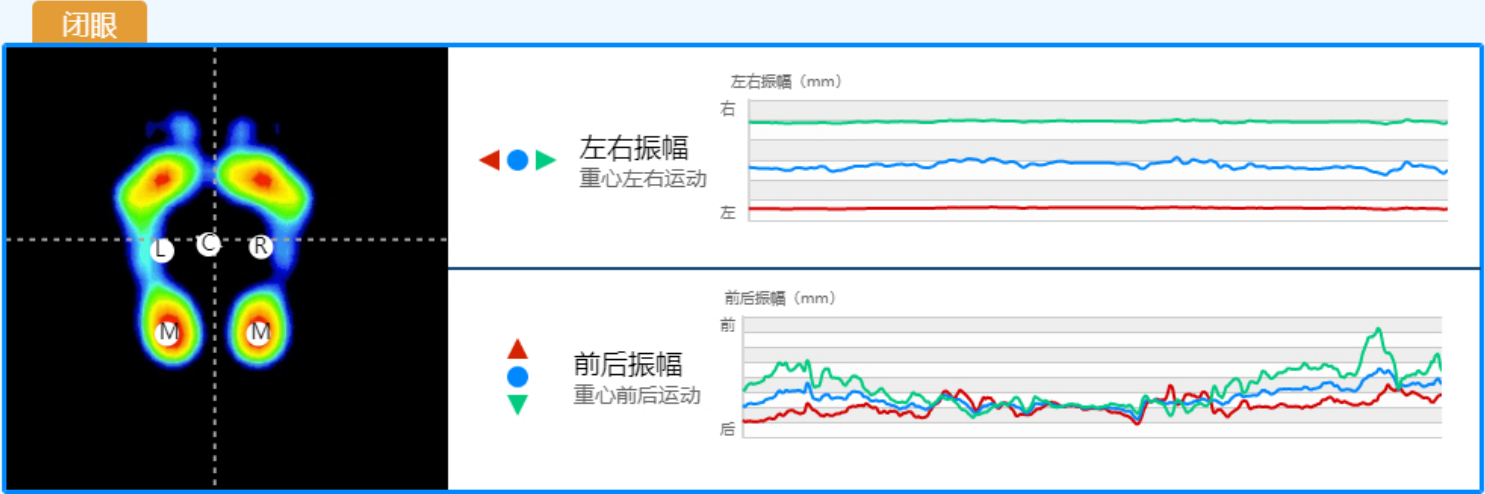

Cop数据

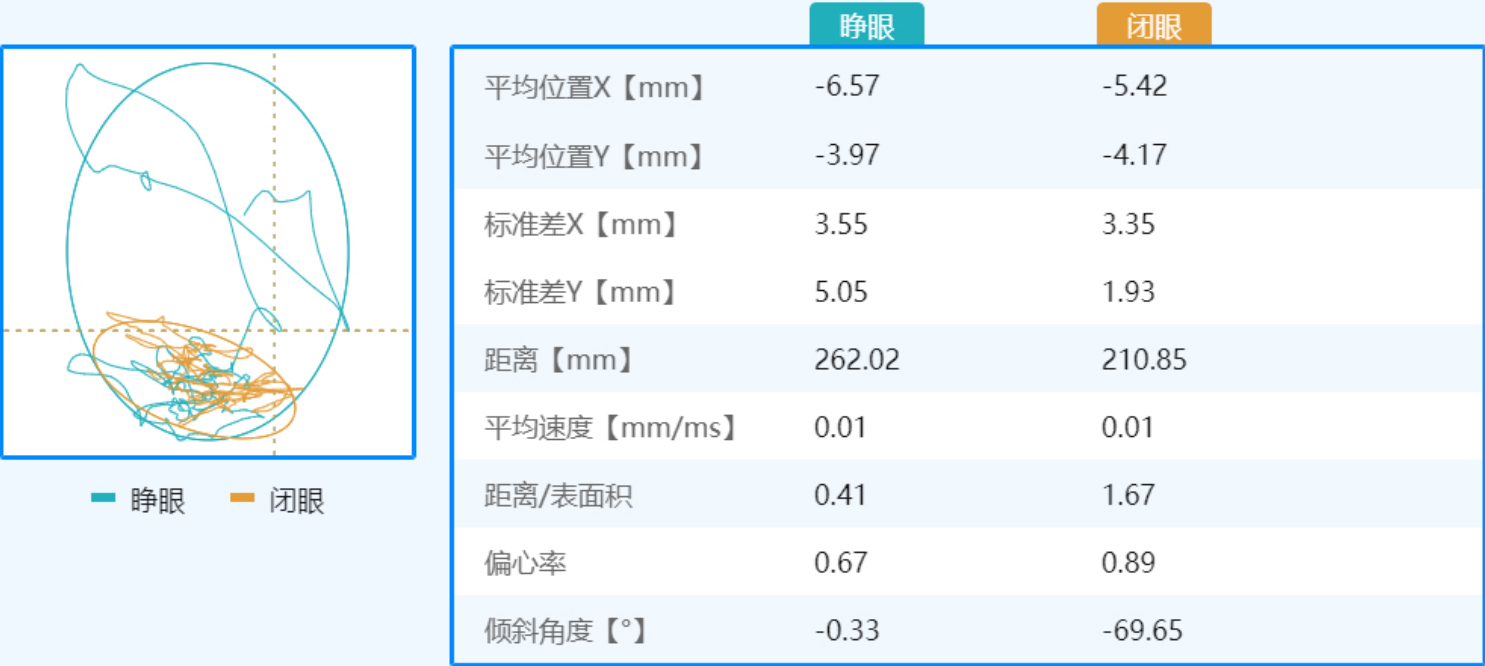

# 平衡报告

王军艳 19岁 女 55.0kg 165.0cm 2025-2-26 15:56:50

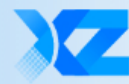

## 报告结论

睁眼  
前后振幅大于参考值  
前后晃动比左右晃动更明显  
闭眼  
左右晃动比前后晃动更明显

Supplement: Supplementary file 43 [file 平衡报告-王军艳-20250303210416.pdf › Plantar pressure and gait analysis/aerobics /平衡报告-王军艳-20250303210416.pdf]



双脚重心变化

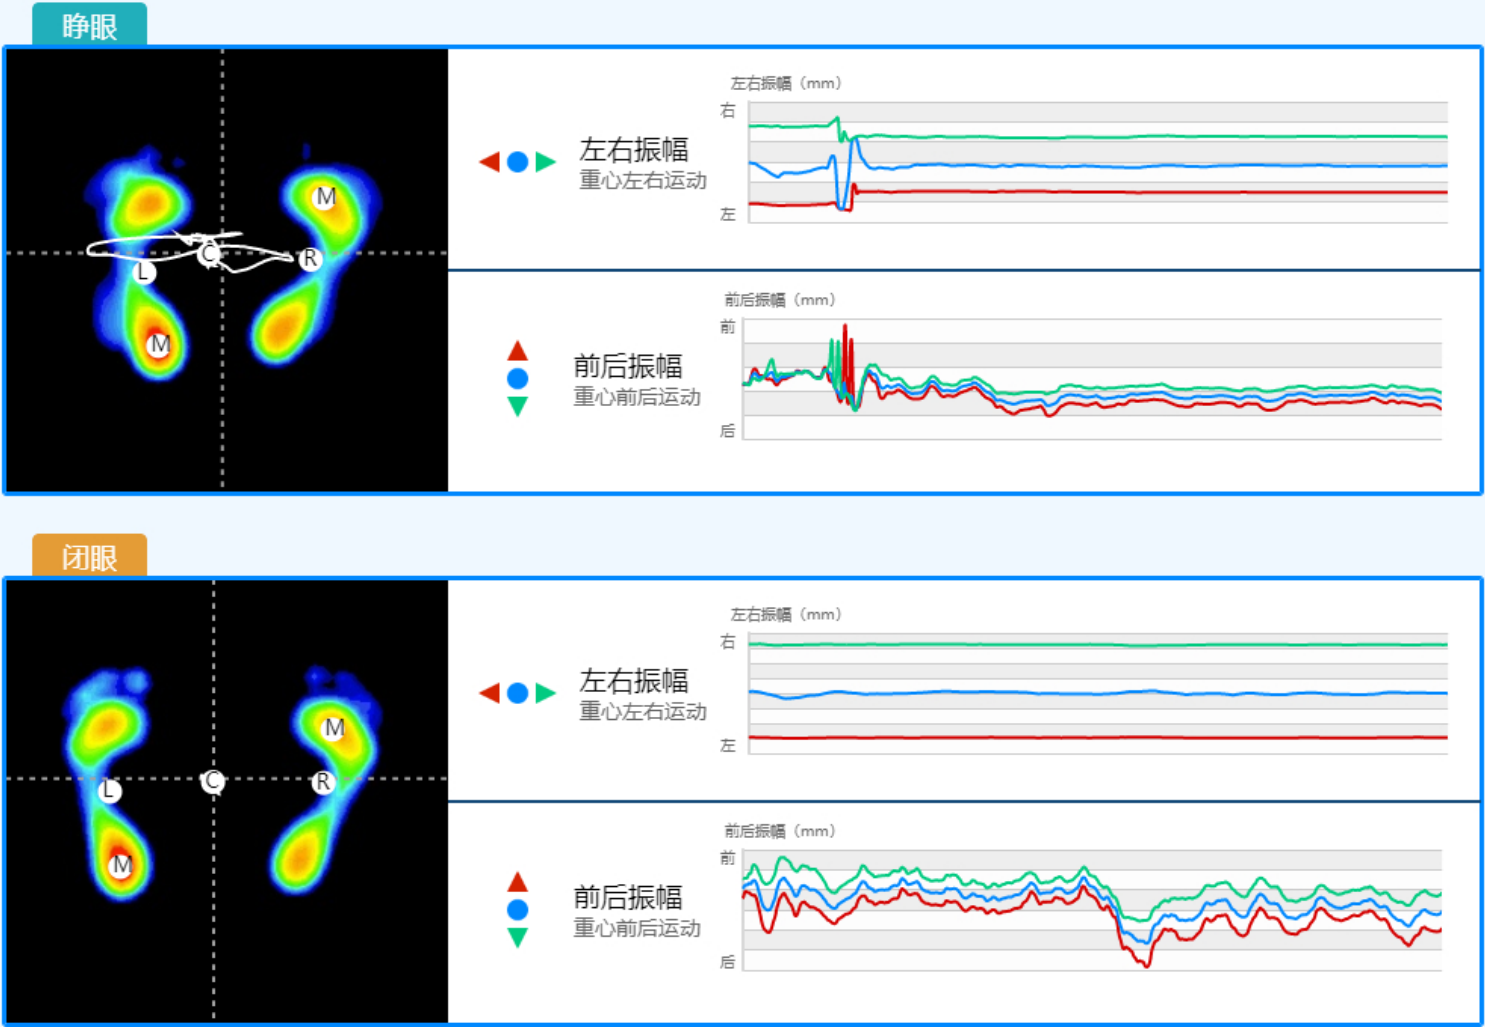

Cop数据

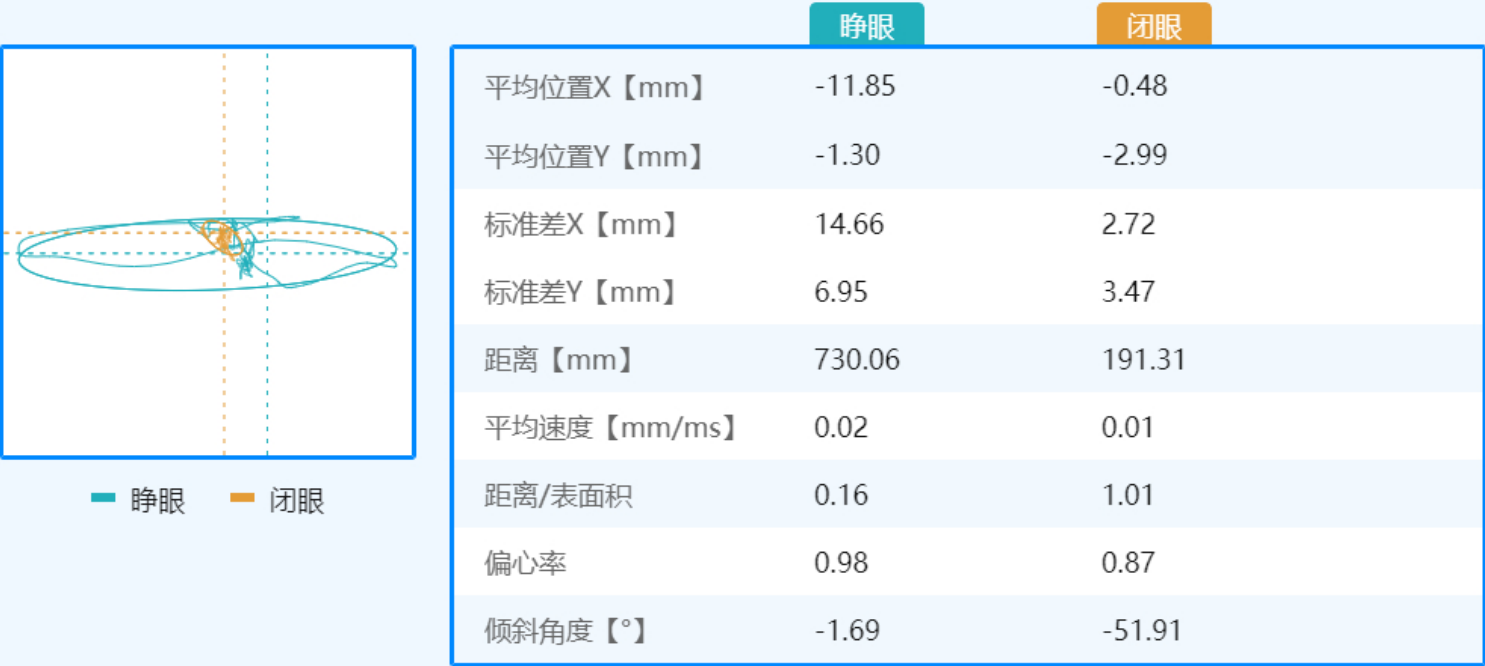

# 平衡报告

王思奕 18岁 女 47.0kg 158.0cm 2025-2-26 10:08:42



## 报告结论

睁眼  
左右振幅大于参考值  
前后振幅大于参考值  
左右晃动比前后晃动更明显  
闭眼  
前后晃动比左右晃动更明显

Supplement: Supplementary file 44 [file 平衡报告-王思奕-20250226100955.pdf › Plantar pressure and gait analysis/aerobics /平衡报告-王思奕-20250226100955.pdf]



双脚重心变化

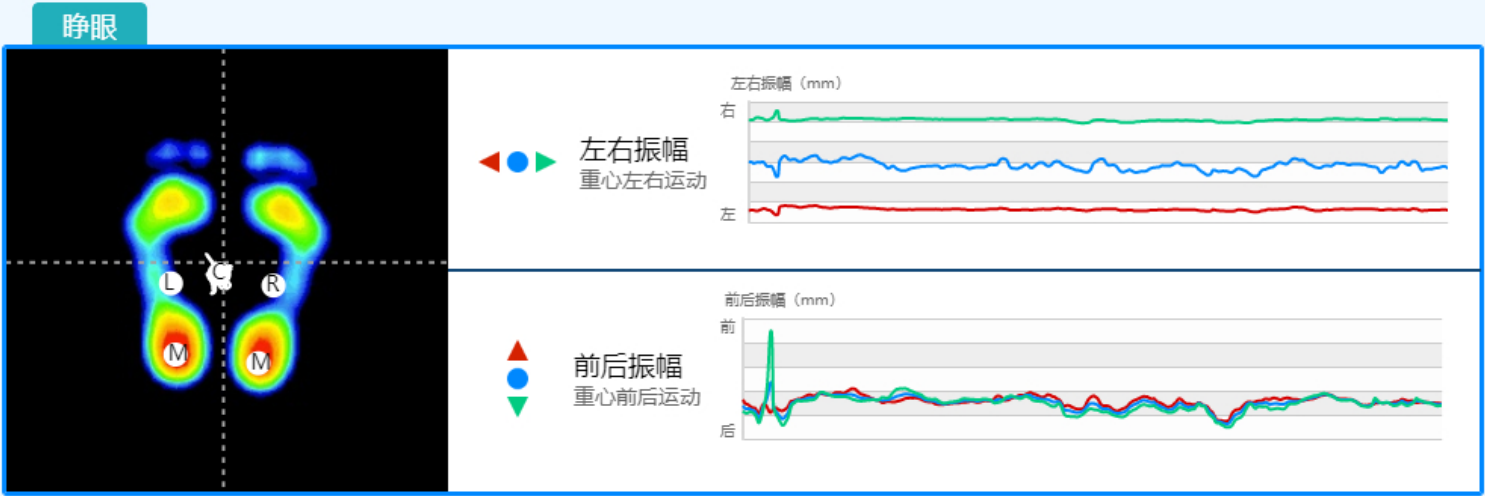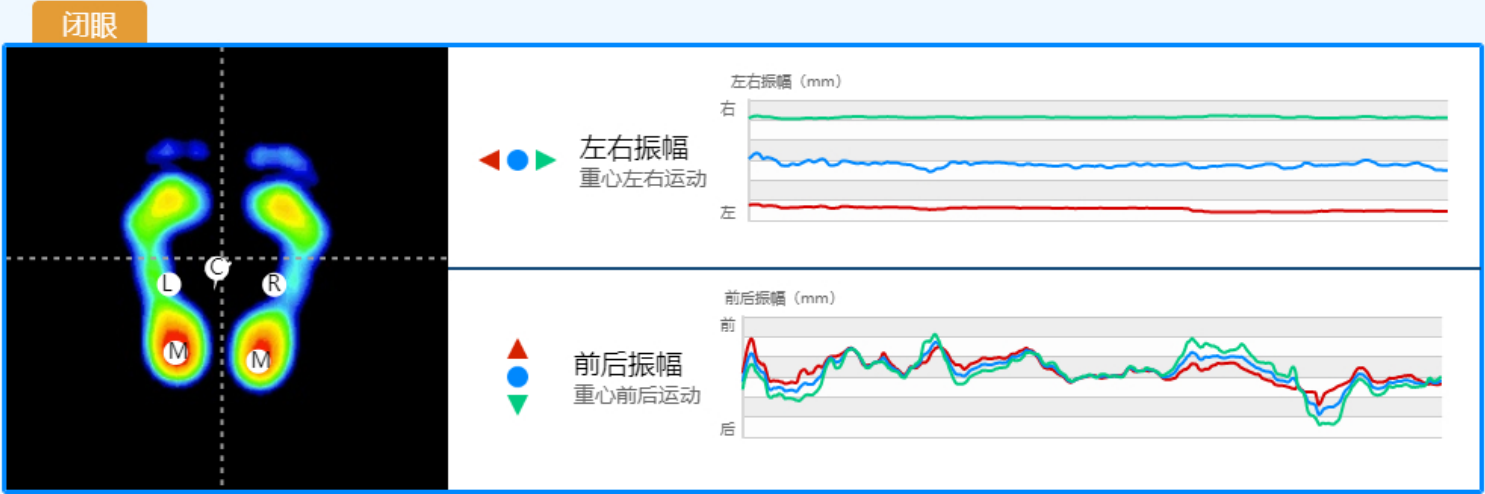

Cop数据

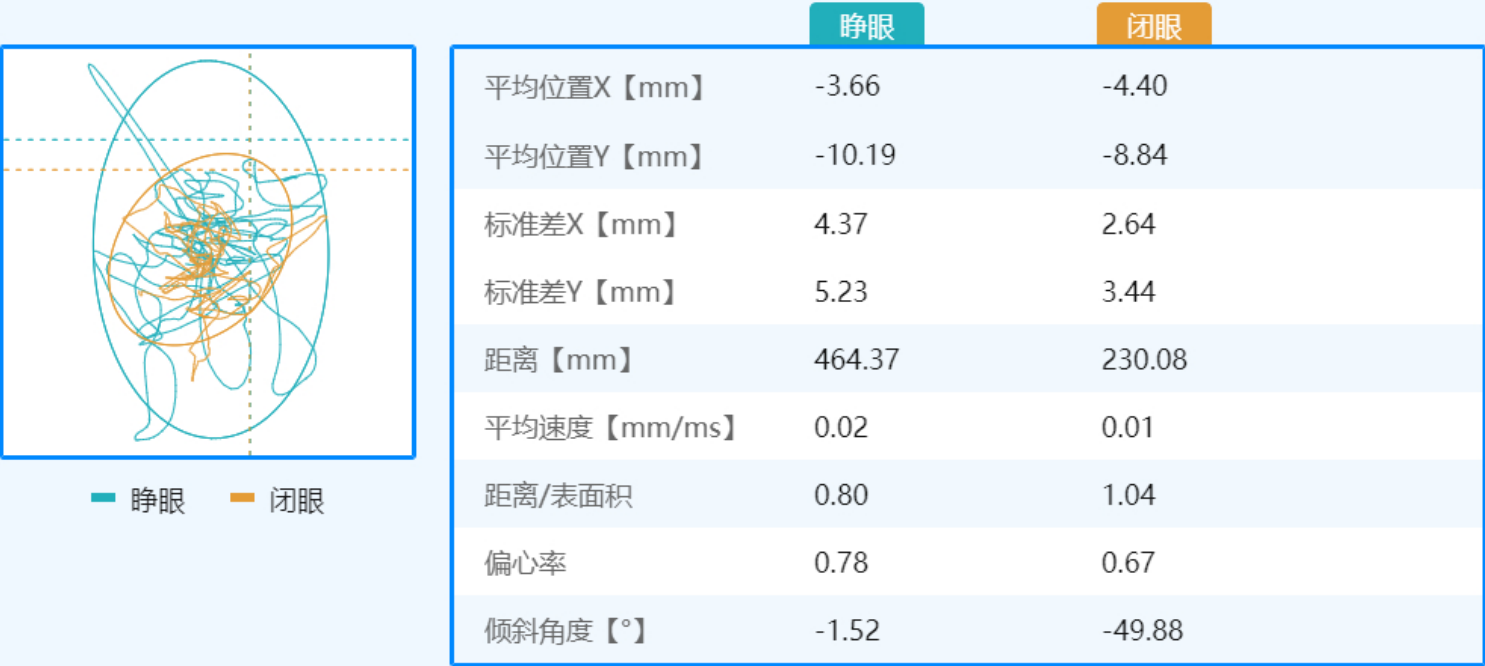

# 平衡报告

秦甜甜 20岁 女 50.0kg 157.0cm 2025-2-26 14:56:38



## 报告结论

睁眼  
前后振幅大于参考值  
前后晃动比左右晃动更明显  
闭眼  
前后晃动比左右晃动更明显

Supplement: Supplementary file 48 [file 平衡报告-秦甜甜-20250226145745.pdf › Plantar pressure and gait analysis/aerobics /平衡报告-秦甜甜-20250226145745.pdf]



双脚重心变化

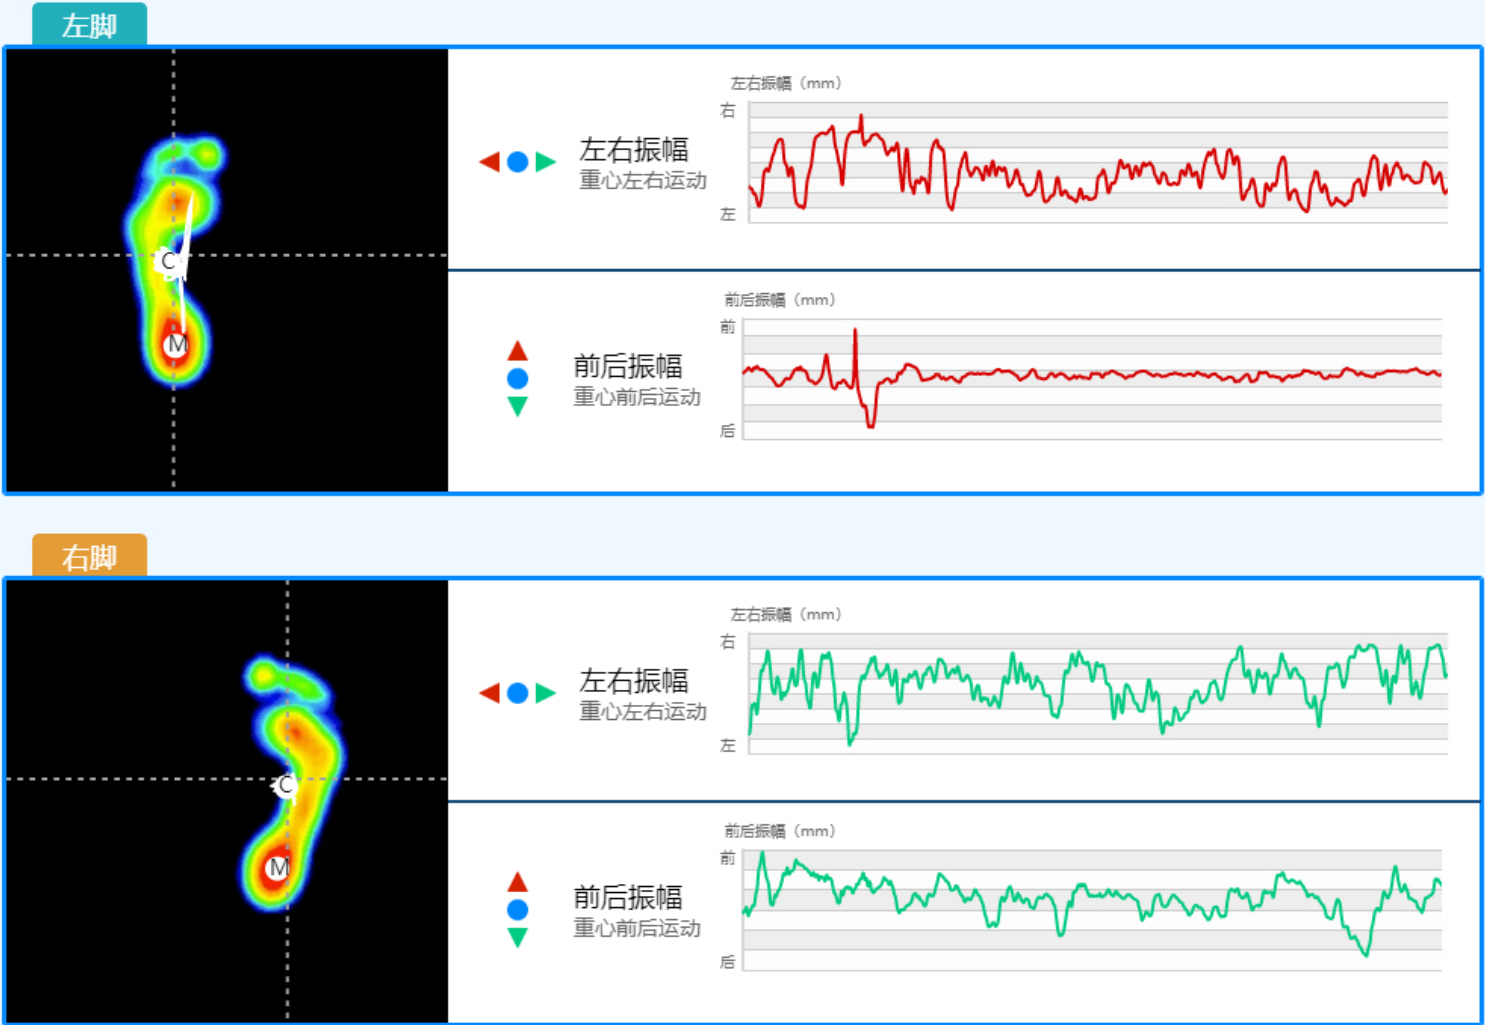

Cop数据

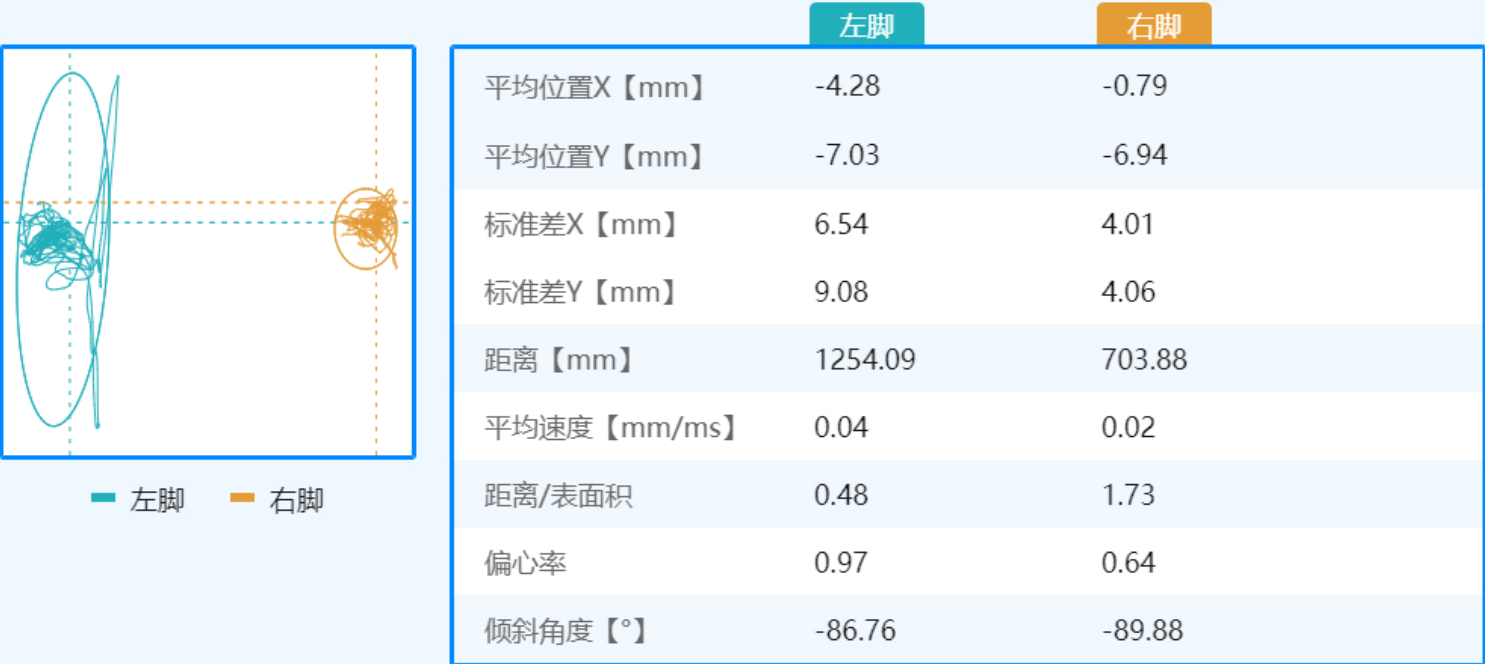

平衡报告

秦甜甜 20岁 女 50.0kg 157.0cm 2025-2-26 14:57:57



报告结论

睁眼  
前后晃动比左右晃动更明显

Supplement: Supplementary file 49 [file 平衡报告-秦甜甜-20250226145906.pdf › Plantar pressure and gait analysis/aerobics /平衡报告-秦甜甜-20250226145906.pdf]



双脚重心变化

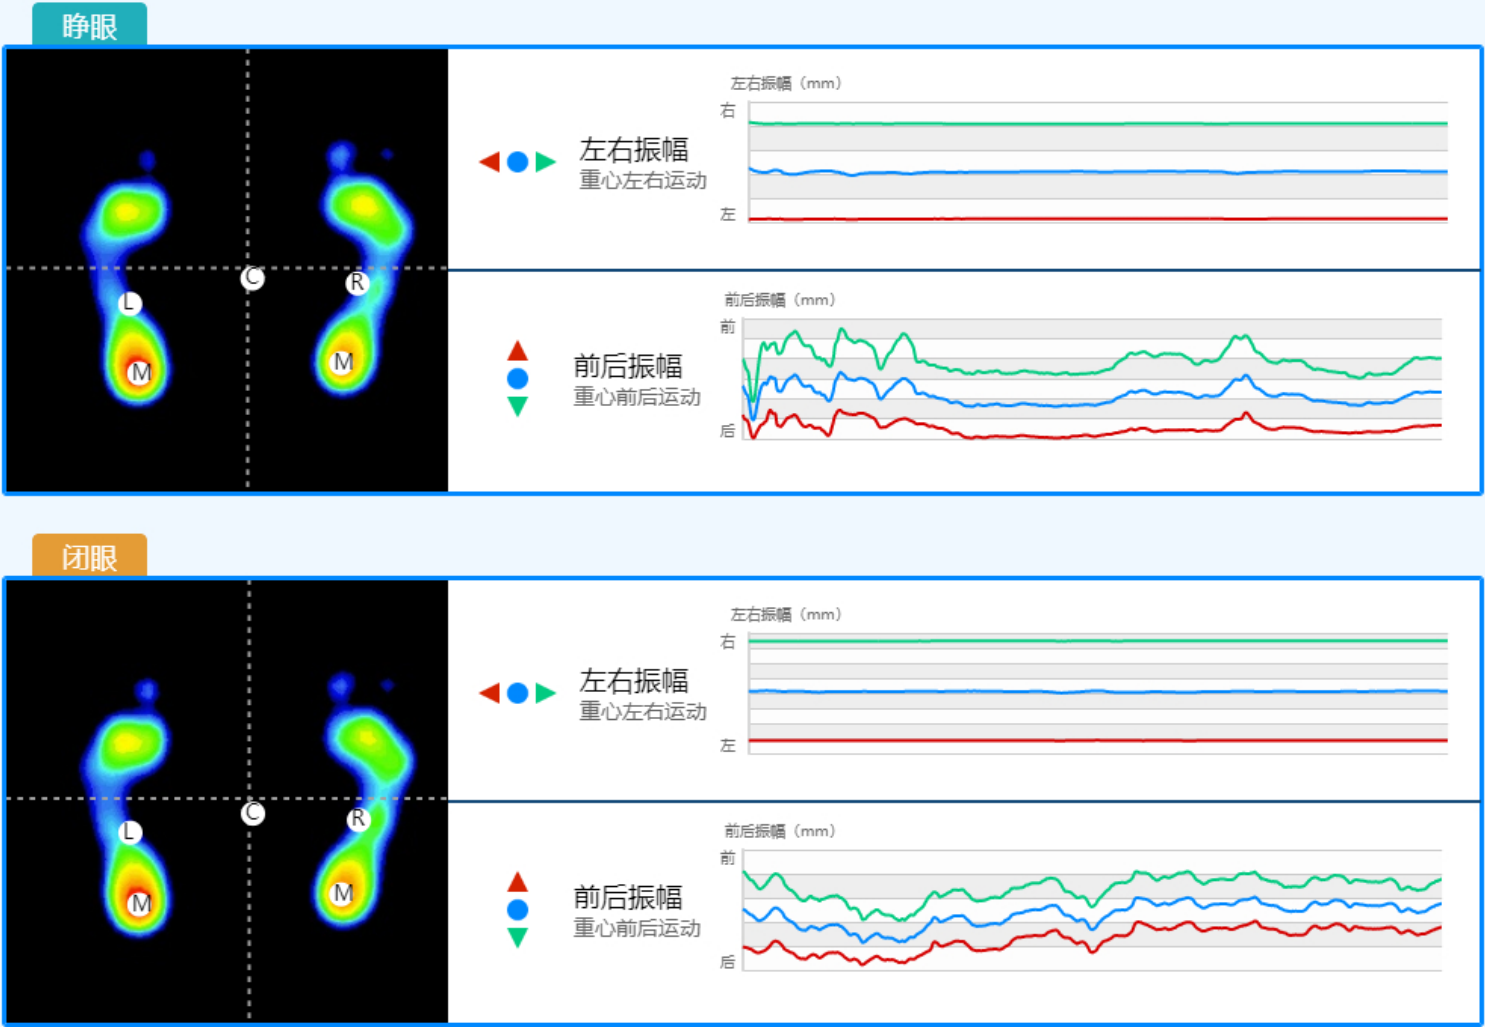

Cop数据

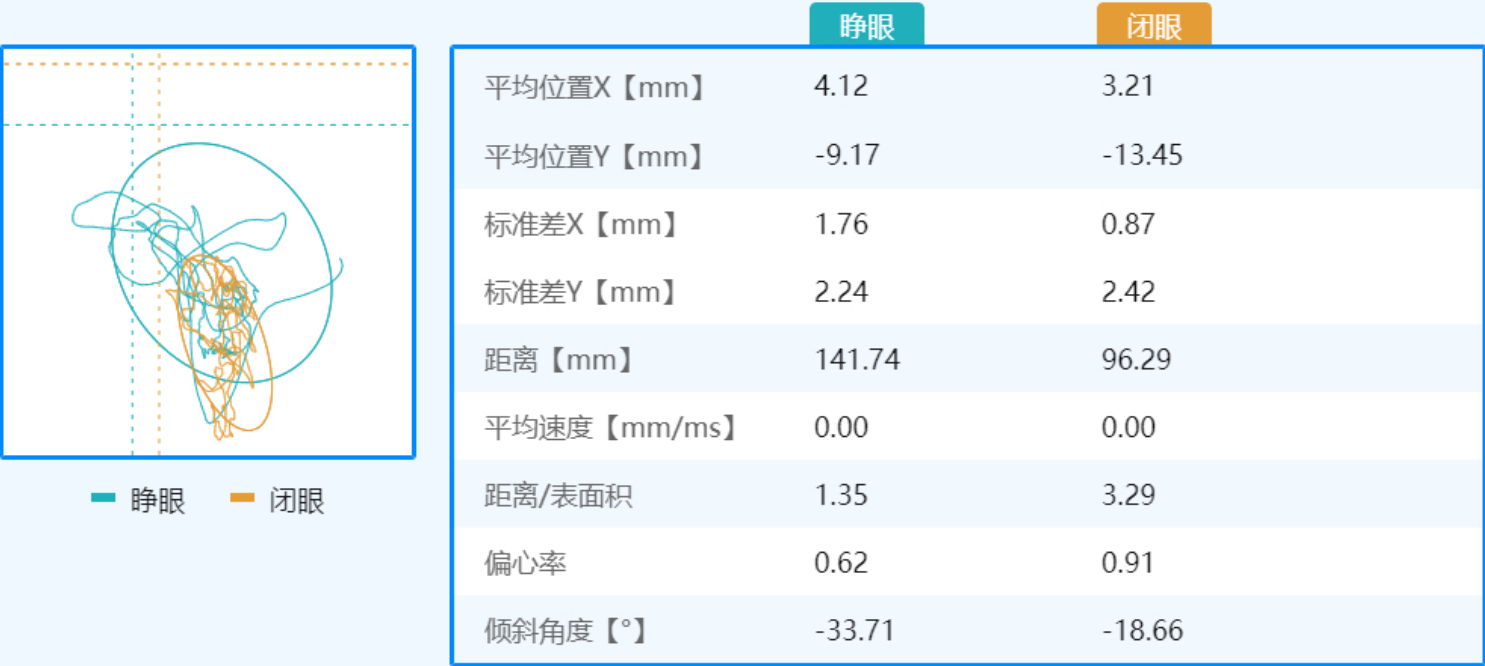

平衡报告

陶奕霖 20岁 女 57.0kg 165.0cm 2025-2-26 10:52:30



报告结论

睁眼  
前后晃动比左右晃动更明显  
闭眼  
前后晃动比左右晃动更明显

Supplement: Supplementary file 52 [file 平衡报告-陶奕霖-20250226105335.pdf › Plantar pressure and gait analysis/aerobics /平衡报告-陶奕霖-20250226105335.pdf]



双脚重心变化

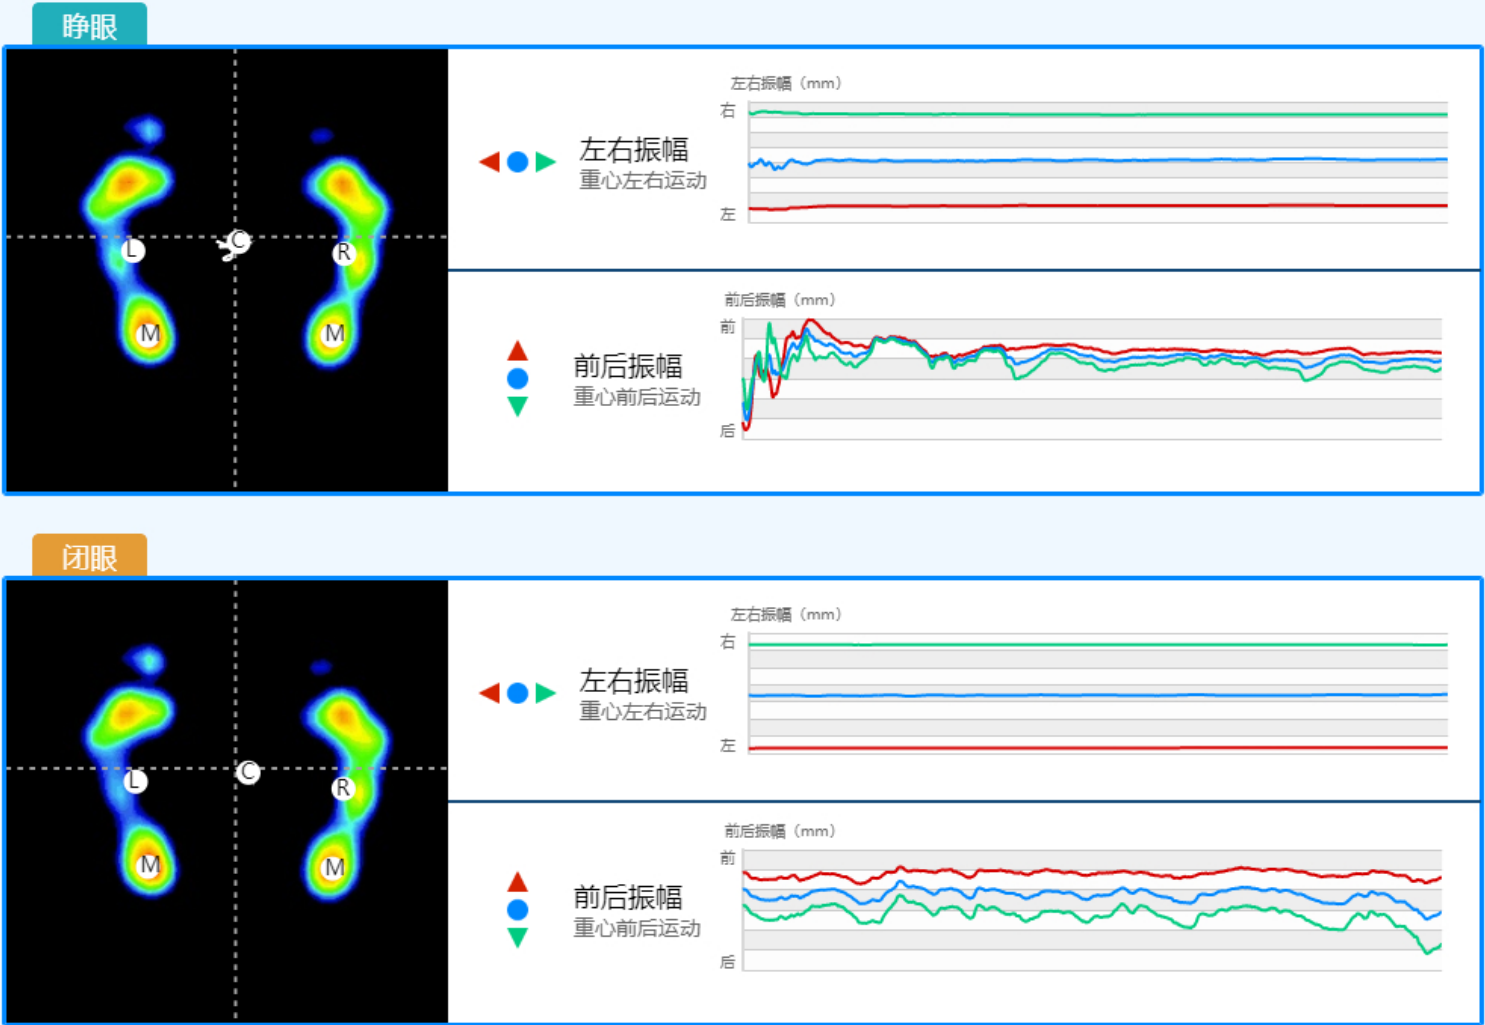

Cop数据

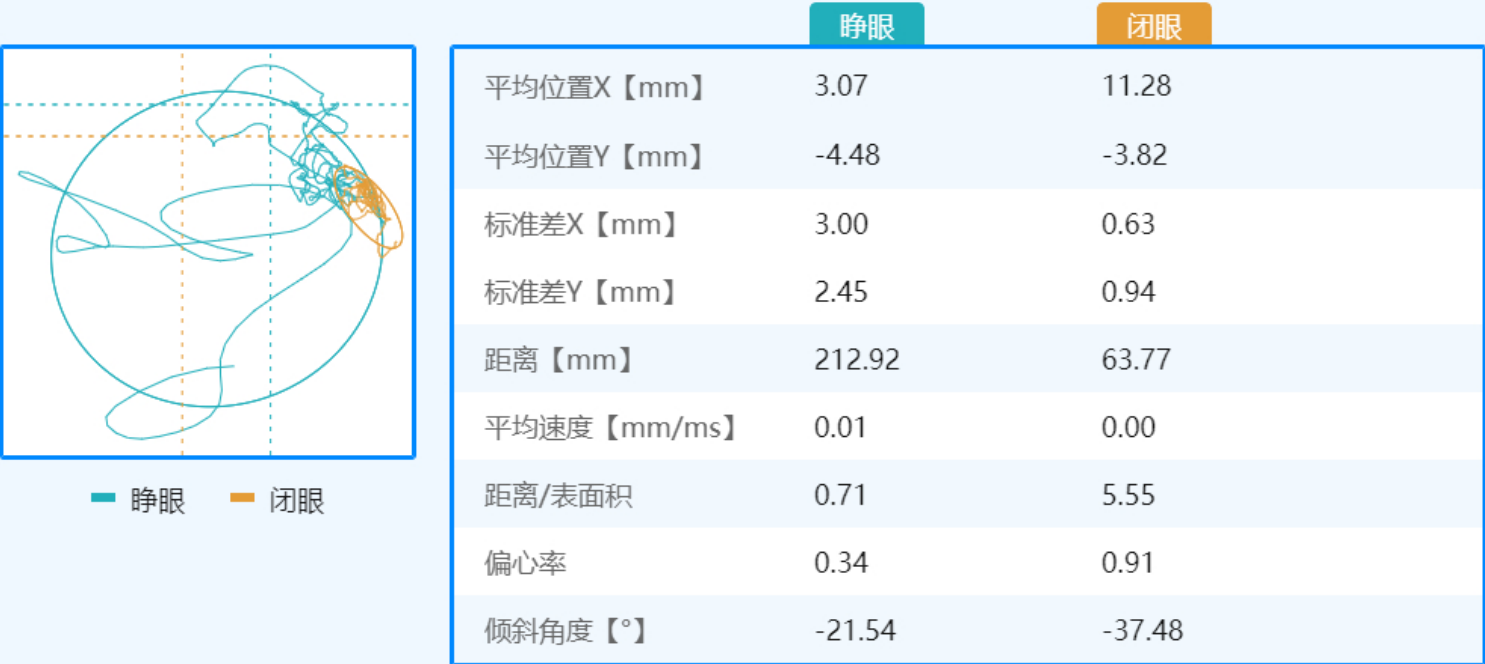

# 平衡报告

丁红丽 18岁 女 45.0kg 163.0cm 2025-2-26 13:52:14



## 报告结论

睁眼  
左右晃动比前后晃动更明显  
闭眼  
前后晃动比左右晃动更明显

Supplement: Supplementary file 89 [file 平衡报告-丁红丽-20250226135320.pdf › Plantar pressure and gait analysis/jump rope/平衡报告-丁红丽-20250226135320.pdf]



双脚重心变化

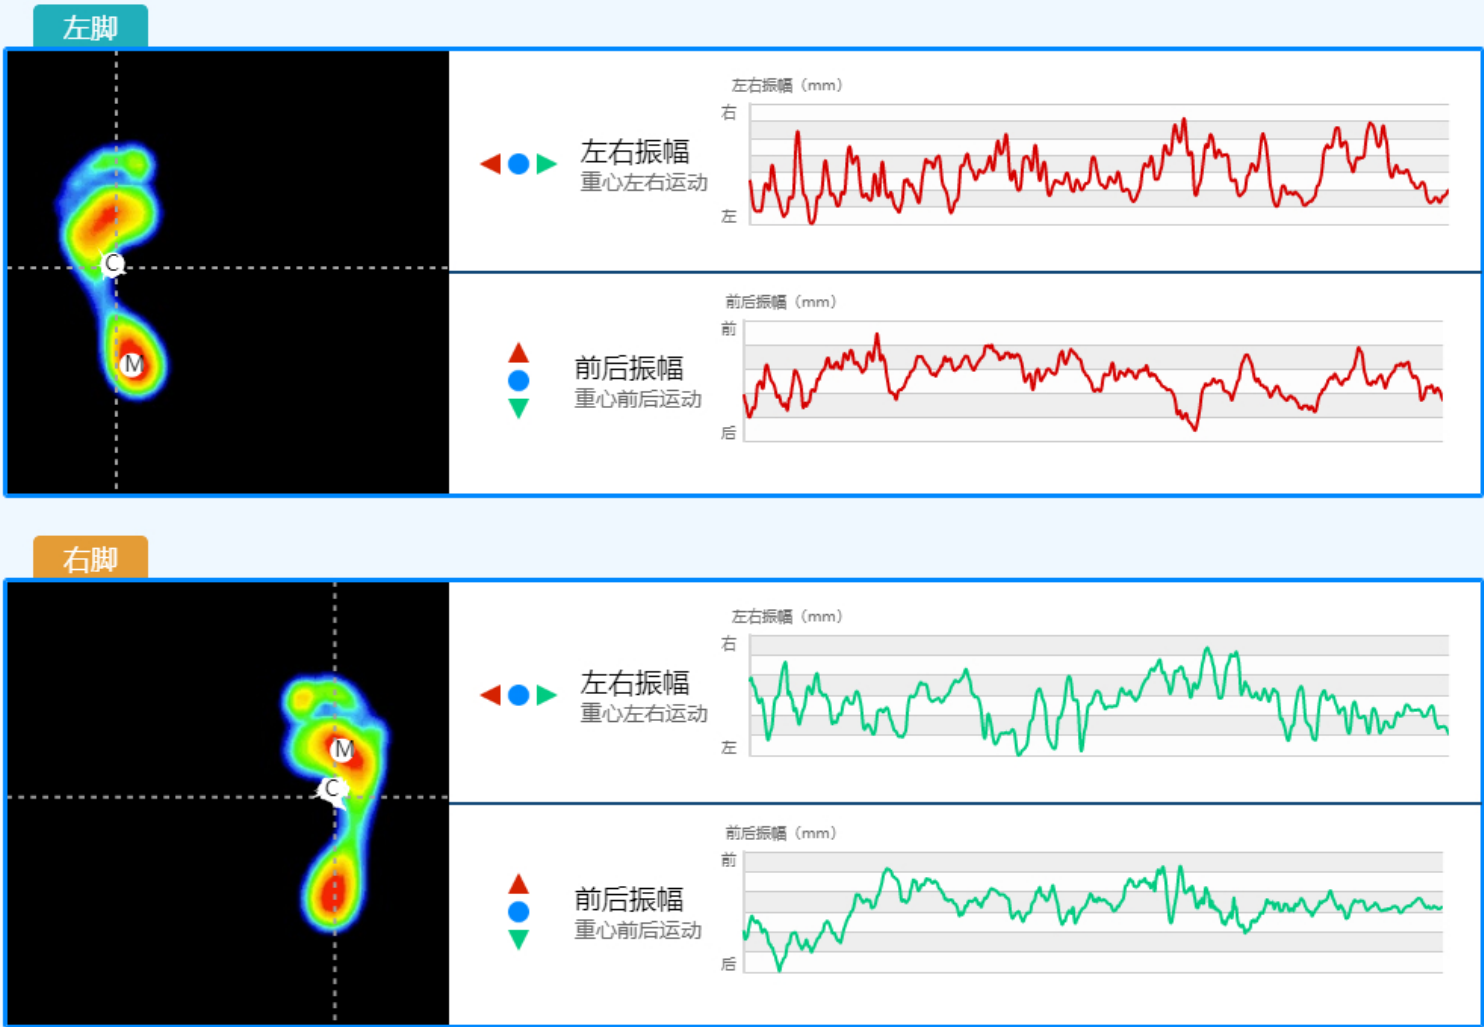

# 平衡报告

张文茹 20岁 女 54.0kg 166.0cm 2025-2-26 12:47:15



## 报告结论

睁眼  
左右振幅大于参考值  
左右晃动比前后晃动更明显

Supplement: Supplementary file 95 [file 平衡报告-张文茹-20250304091902.pdf › Plantar pressure and gait analysis/jump rope/平衡报告-张文茹-20250304091902.pdf]



双脚重心变化

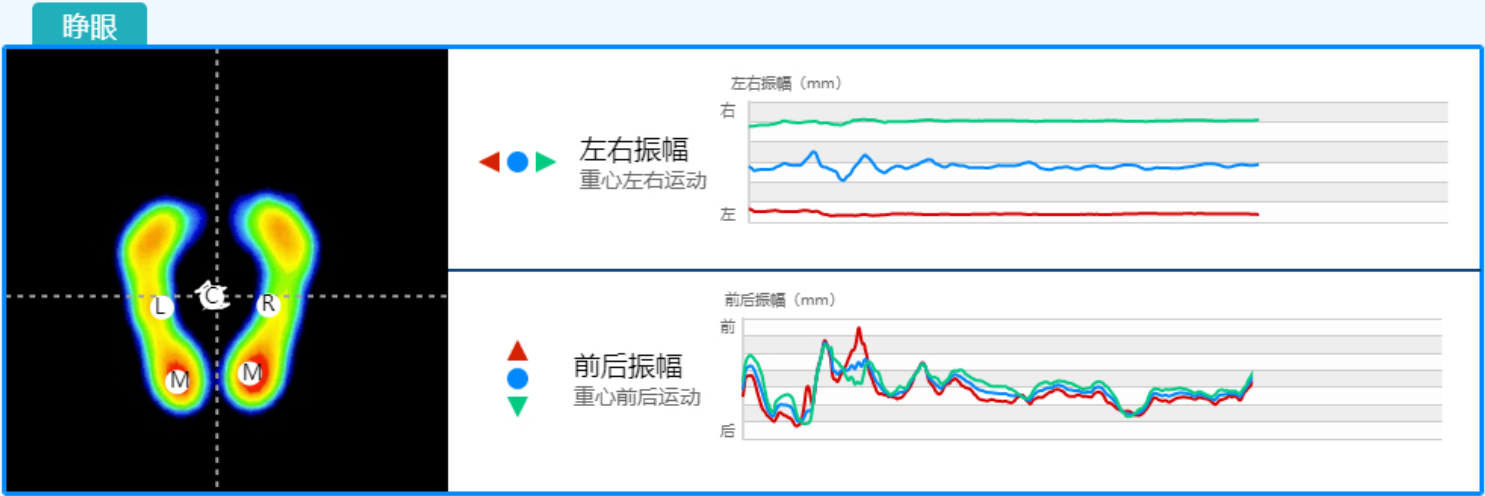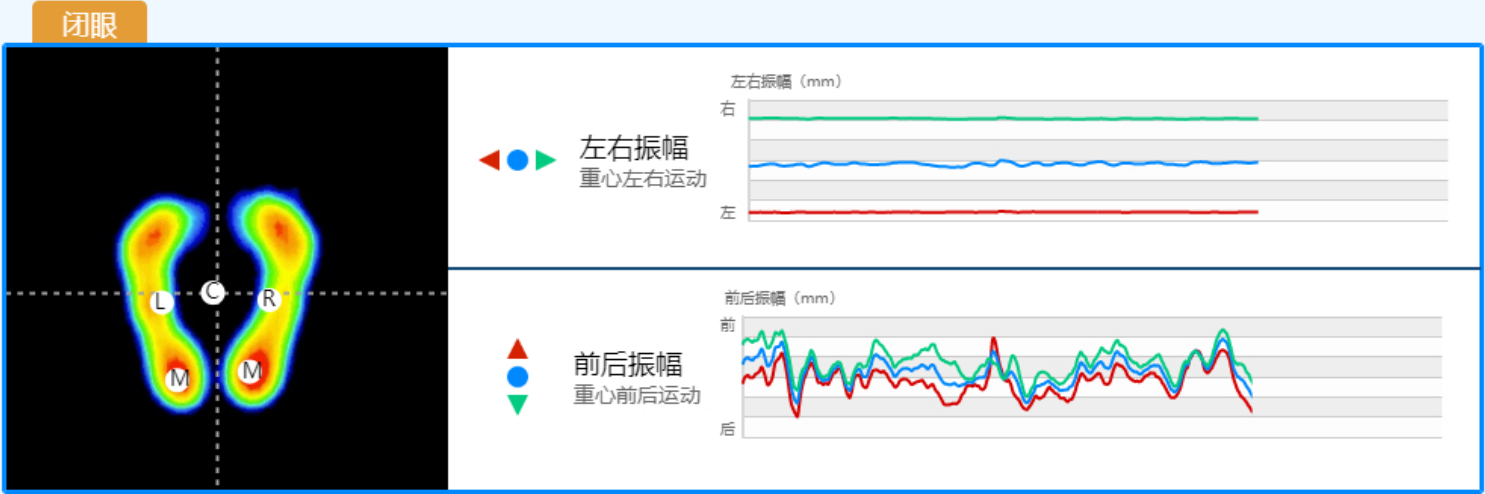

Cop数据

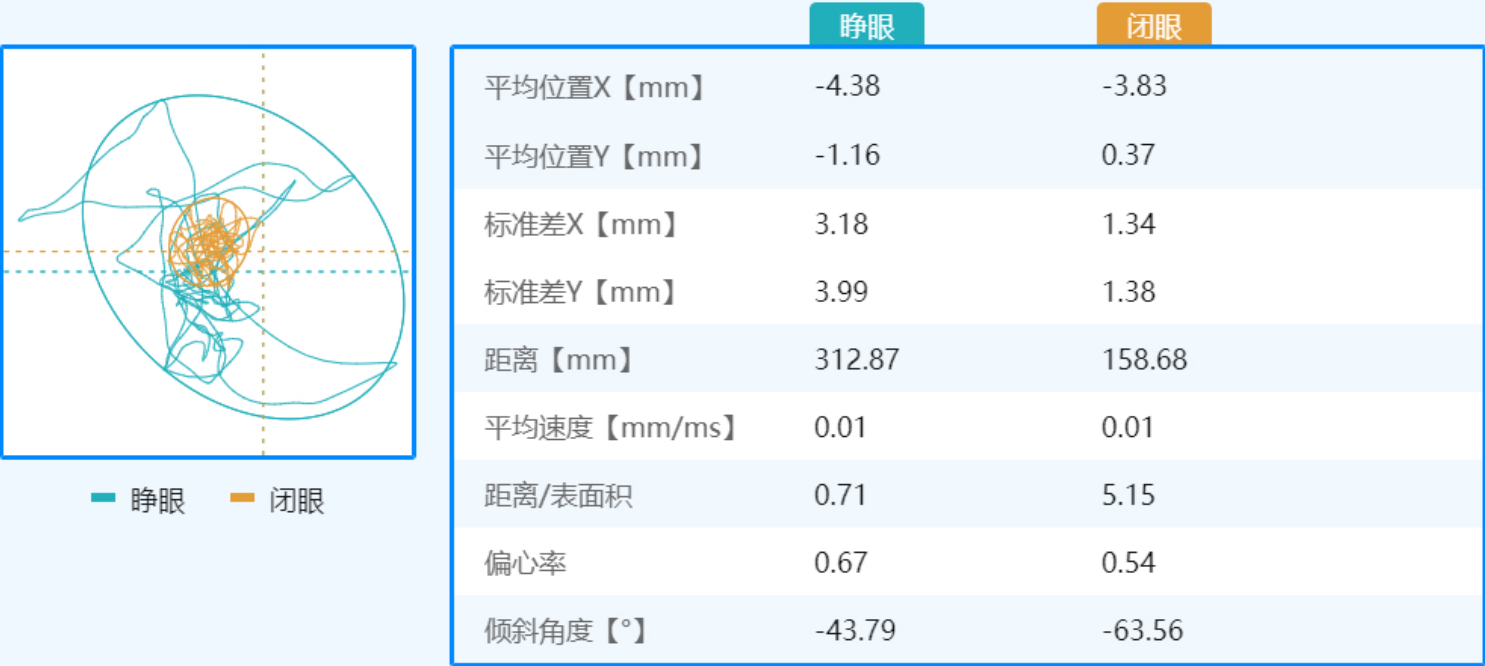

平衡报告

毋梦鑫 19岁 女 58.0kg 162.0cm 2025-2-26 16:17:39



报告结论

睁眼  
前后晃动比左右晃动更明显  
闭眼  
前后晃动比左右晃动更明显

Supplement: Supplementary file 104 [file 平衡报告-毋梦鑫-20250226164906.pdf › Plantar pressure and gait analysis/jump rope/平衡报告-毋梦鑫-20250226164906.pdf]



双脚重心变化

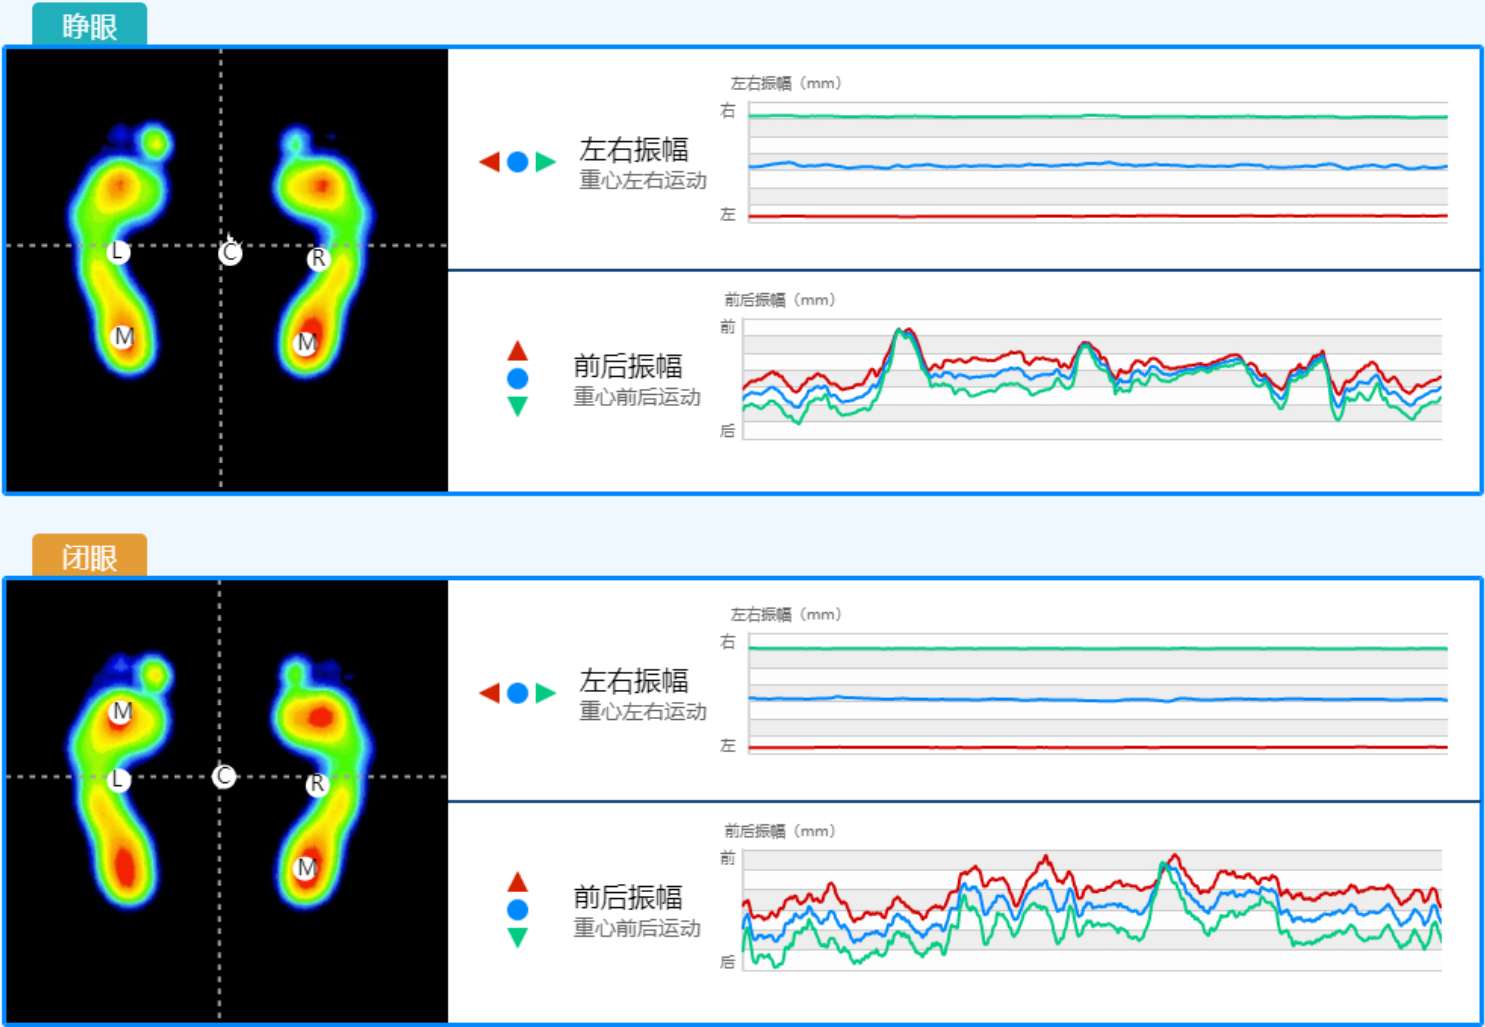

Cop数据

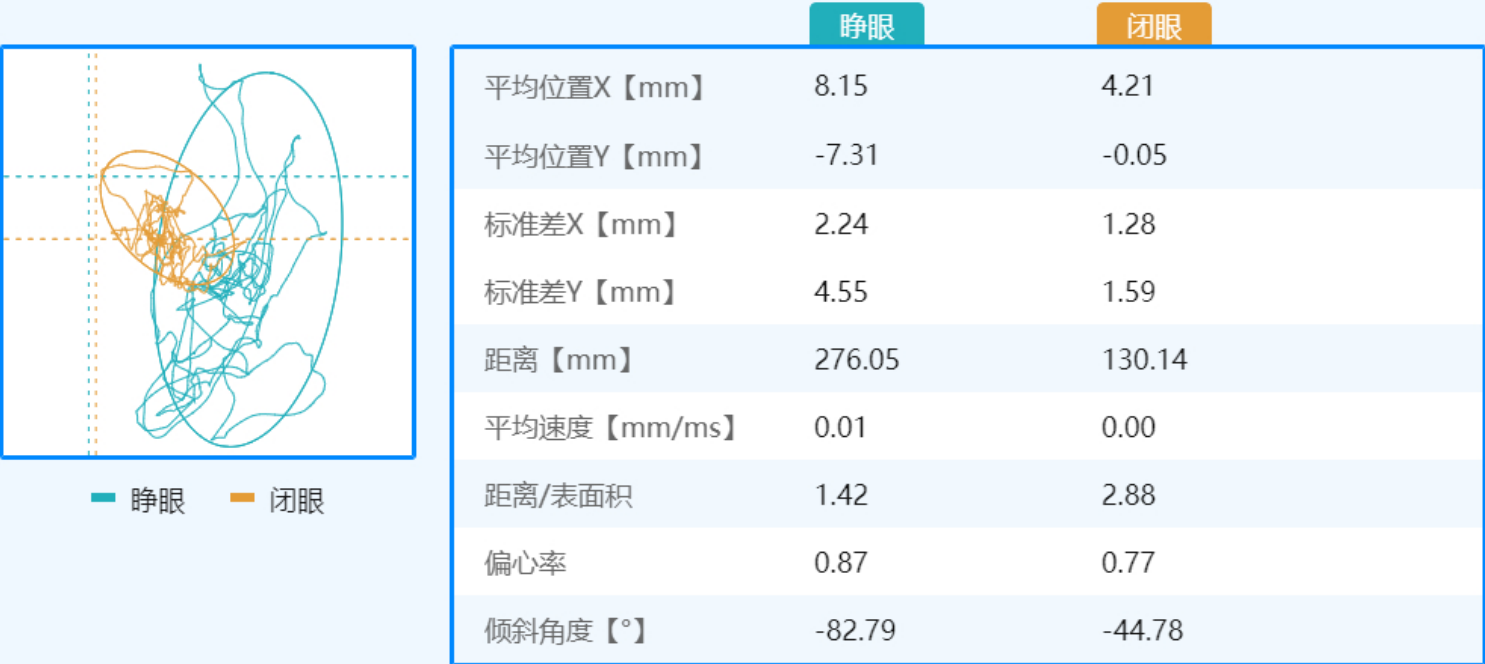

# 平衡报告

闫静雯 19岁 女 52.0kg 162.0cm 2025-2-26 12:51:27



## 报告结论

睁眼  
前后晃动比左右晃动更明显  
闭眼  
前后晃动比左右晃动更明显

Supplement: Supplementary file 111 [file 平衡报告-闫静雯-20250226125235.pdf › Plantar pressure and gait analysis/jump rope/平衡报告-闫静雯-20250226125235.pdf]



双脚重心变化

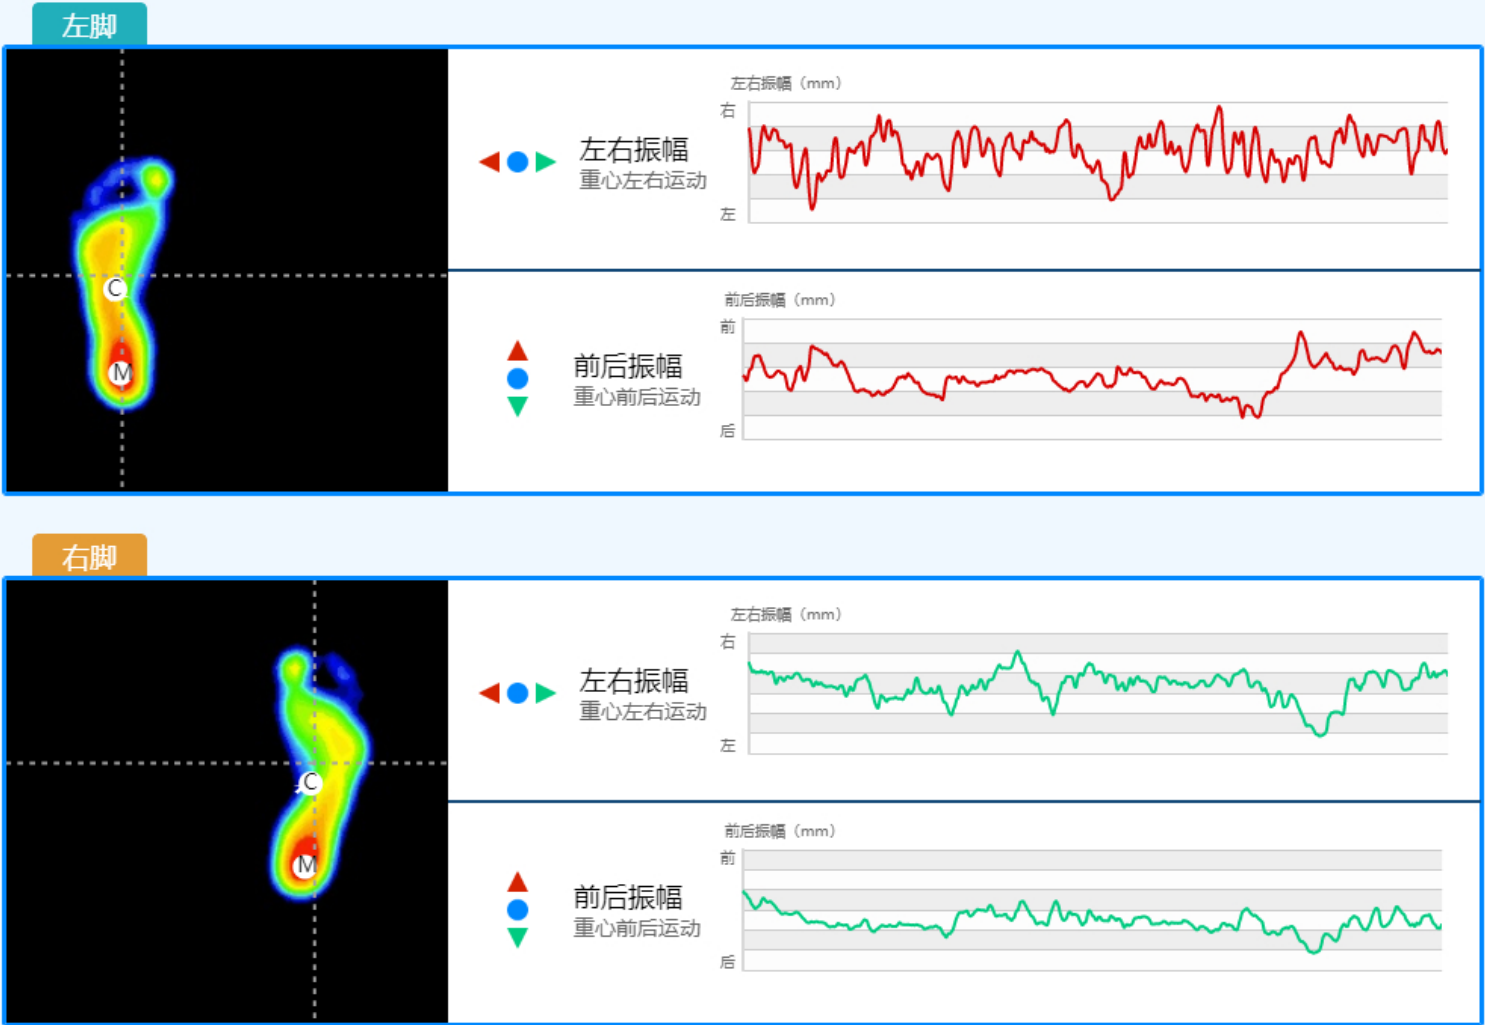

# 平衡报告

何依雯 20岁 女 52.0kg 158.0cm 2025-2-26 13:59:05



## 报告结论

睁眼  
左右晃动比前后晃动更明显

Supplement: Supplementary file 159 [file 平衡报告-何依雯-20250226140012.pdf › Plantar pressure and gait analysis/soccer/平衡报告-何依雯-20250226140012.pdf]



双脚重心变化

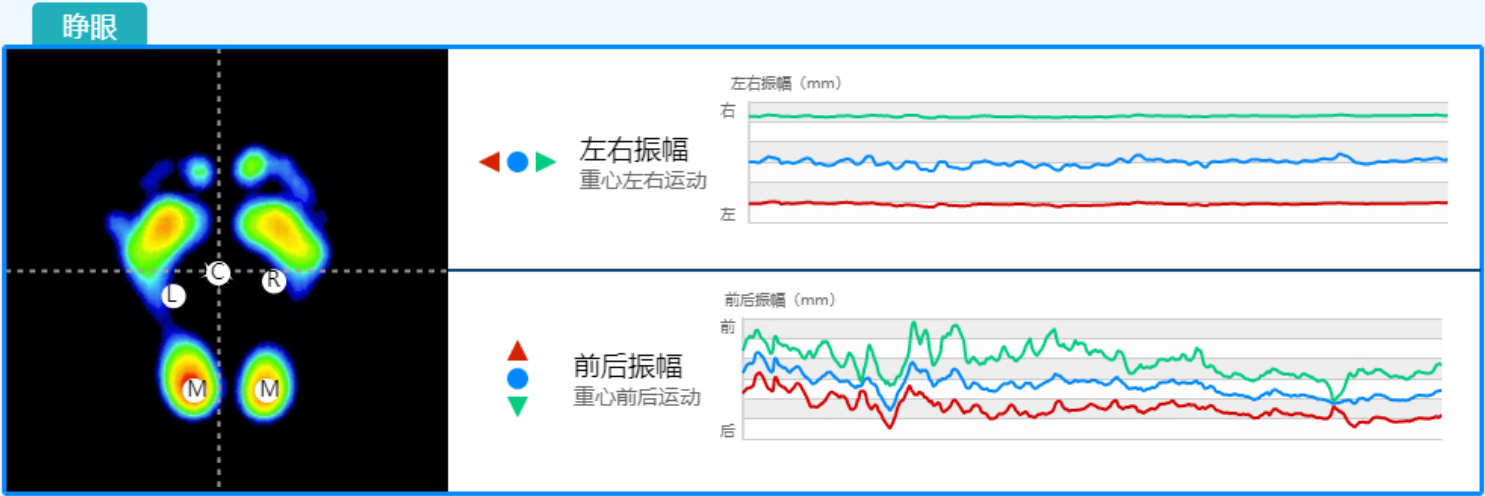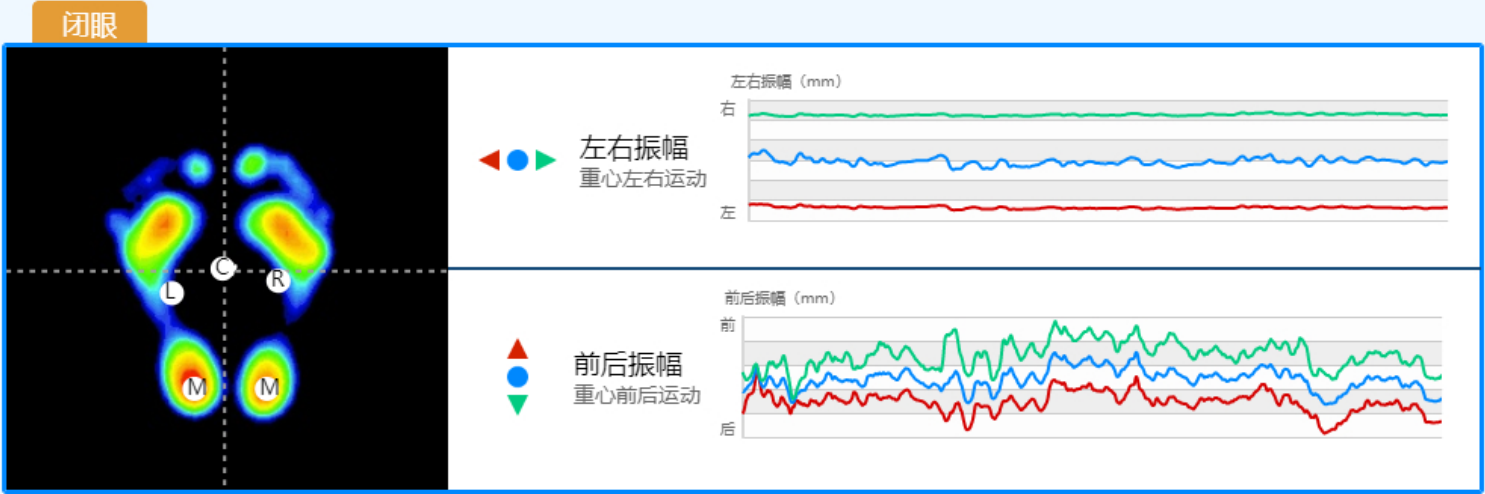

Cop数据

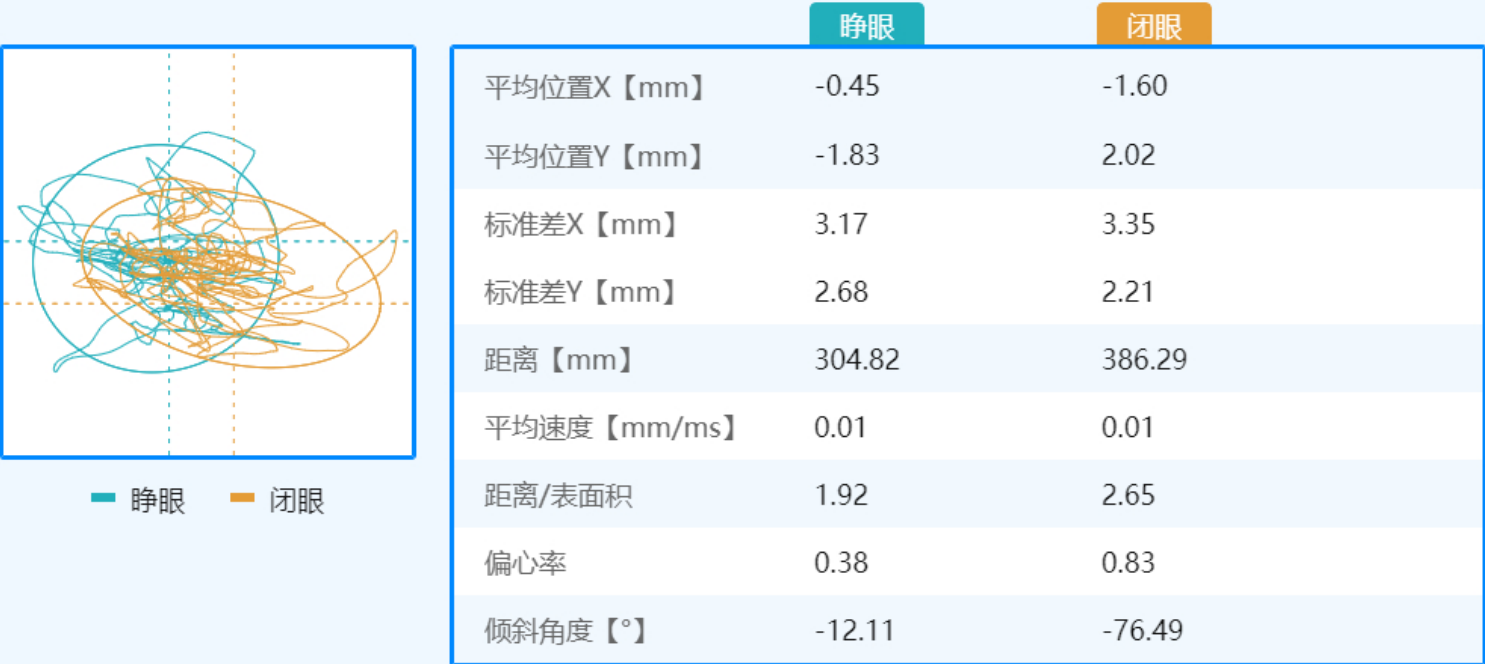

平衡报告

何长强 20岁 男 58.0kg 177.0cm 2025-2-26 15:15:27



报告结论

睁眼  
左右晃动比前后晃动更明显  
闭眼  
左右晃动比前后晃动更明显

Supplement: Supplementary file 160 [file 平衡报告-何长强-20250226151633.pdf › Plantar pressure and gait analysis/soccer/平衡报告-何长强-20250226151633.pdf]



双脚重心变化

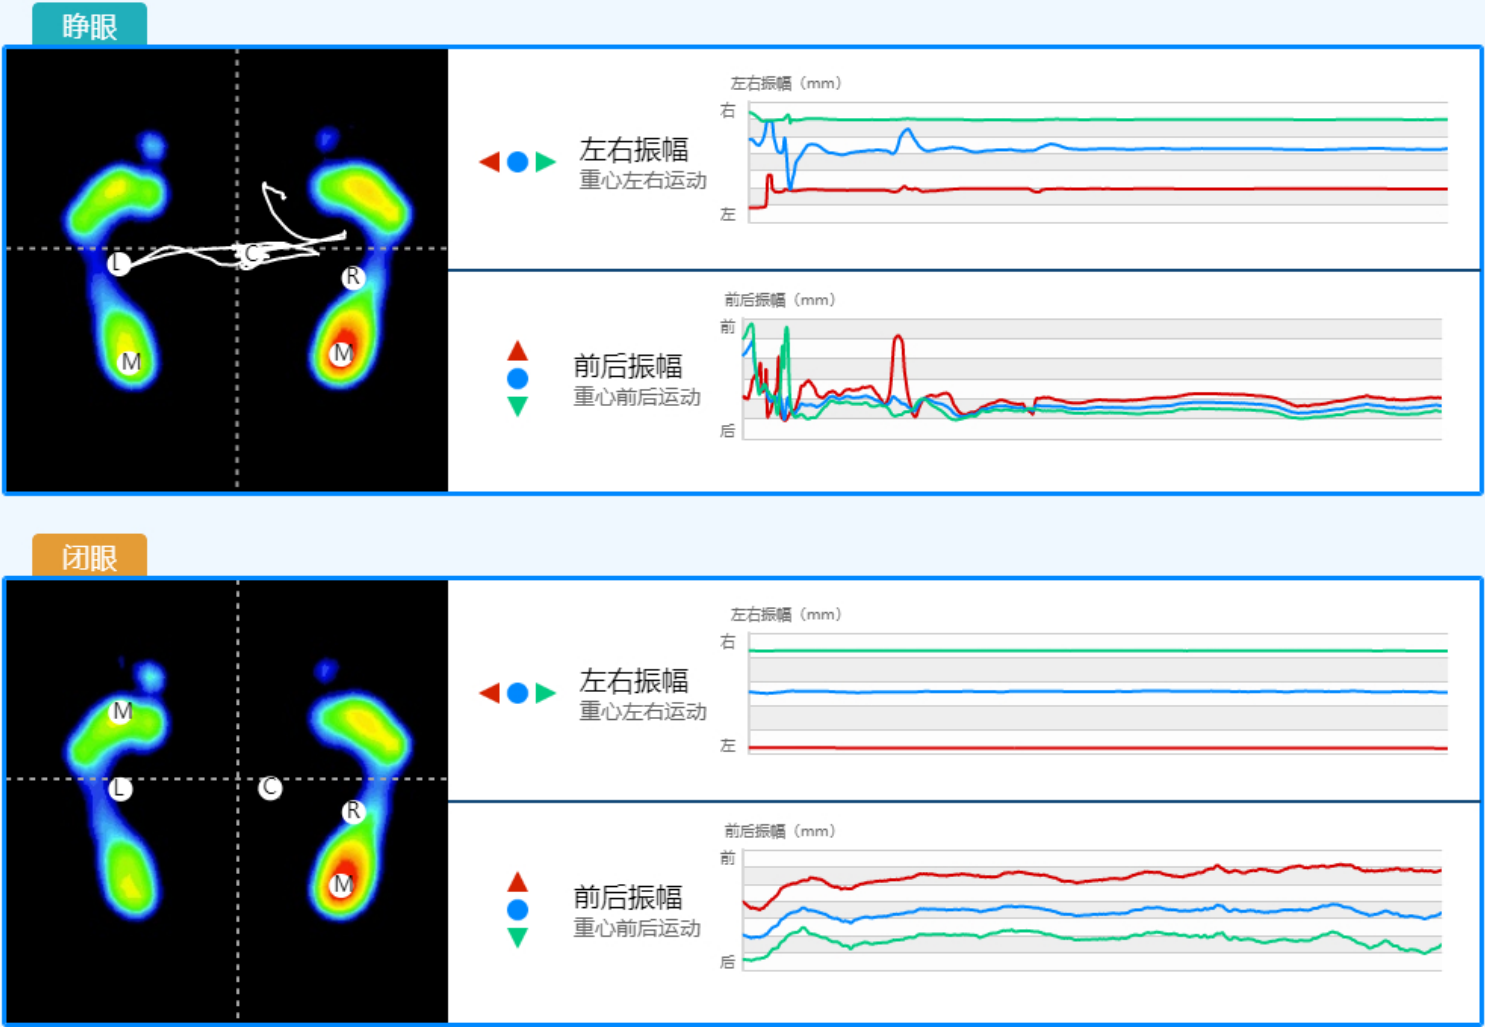

Cop数据

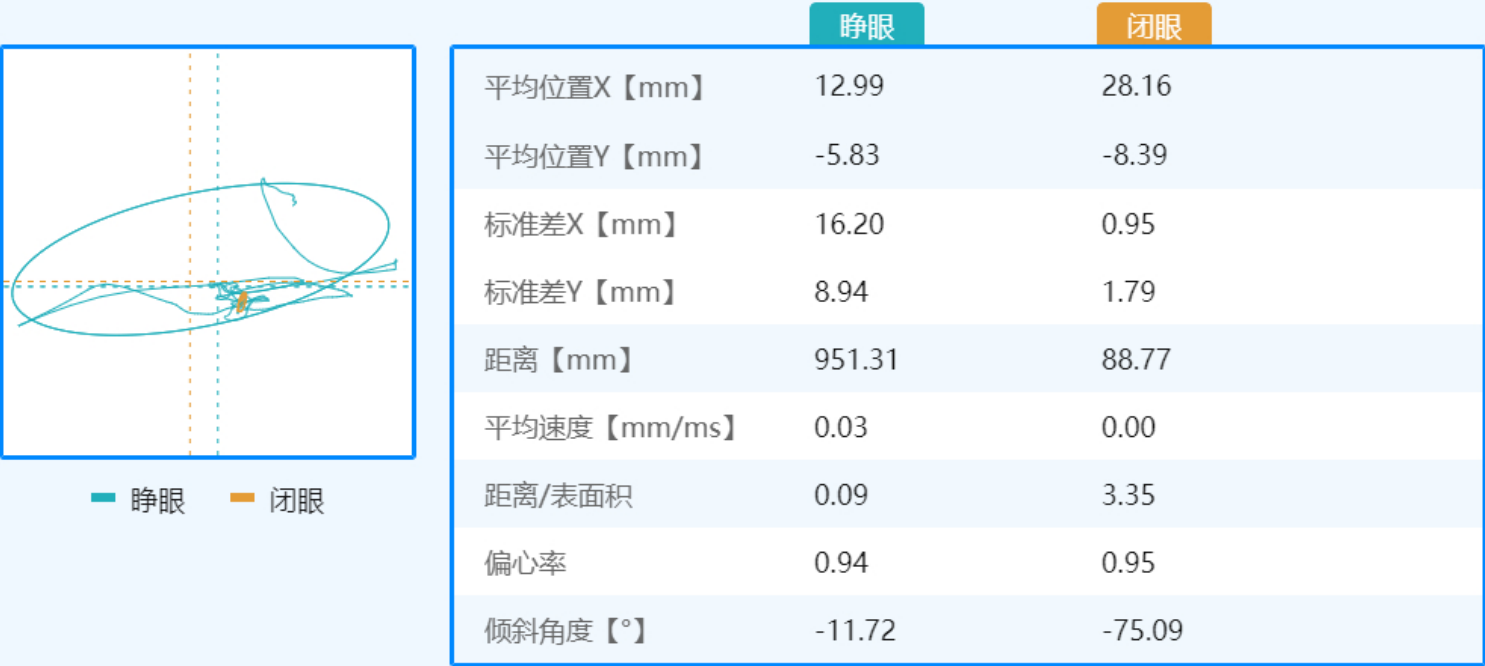

# 平衡报告

席耘赫 20岁 男 50.0kg 175.0cm 2025-2-26 11:03:25



## 报告结论

睁眼  
左右振幅大于参考值  
前后振幅大于参考值  
左右晃动比前后晃动更明显  
闭眼  
前后晃动比左右晃动更明显

Supplement: Supplementary file 162 [file 平衡报告-席耘赫-20250226110431.pdf › Plantar pressure and gait analysis/soccer/平衡报告-席耘赫-20250226110431.pdf]



双脚重心变化

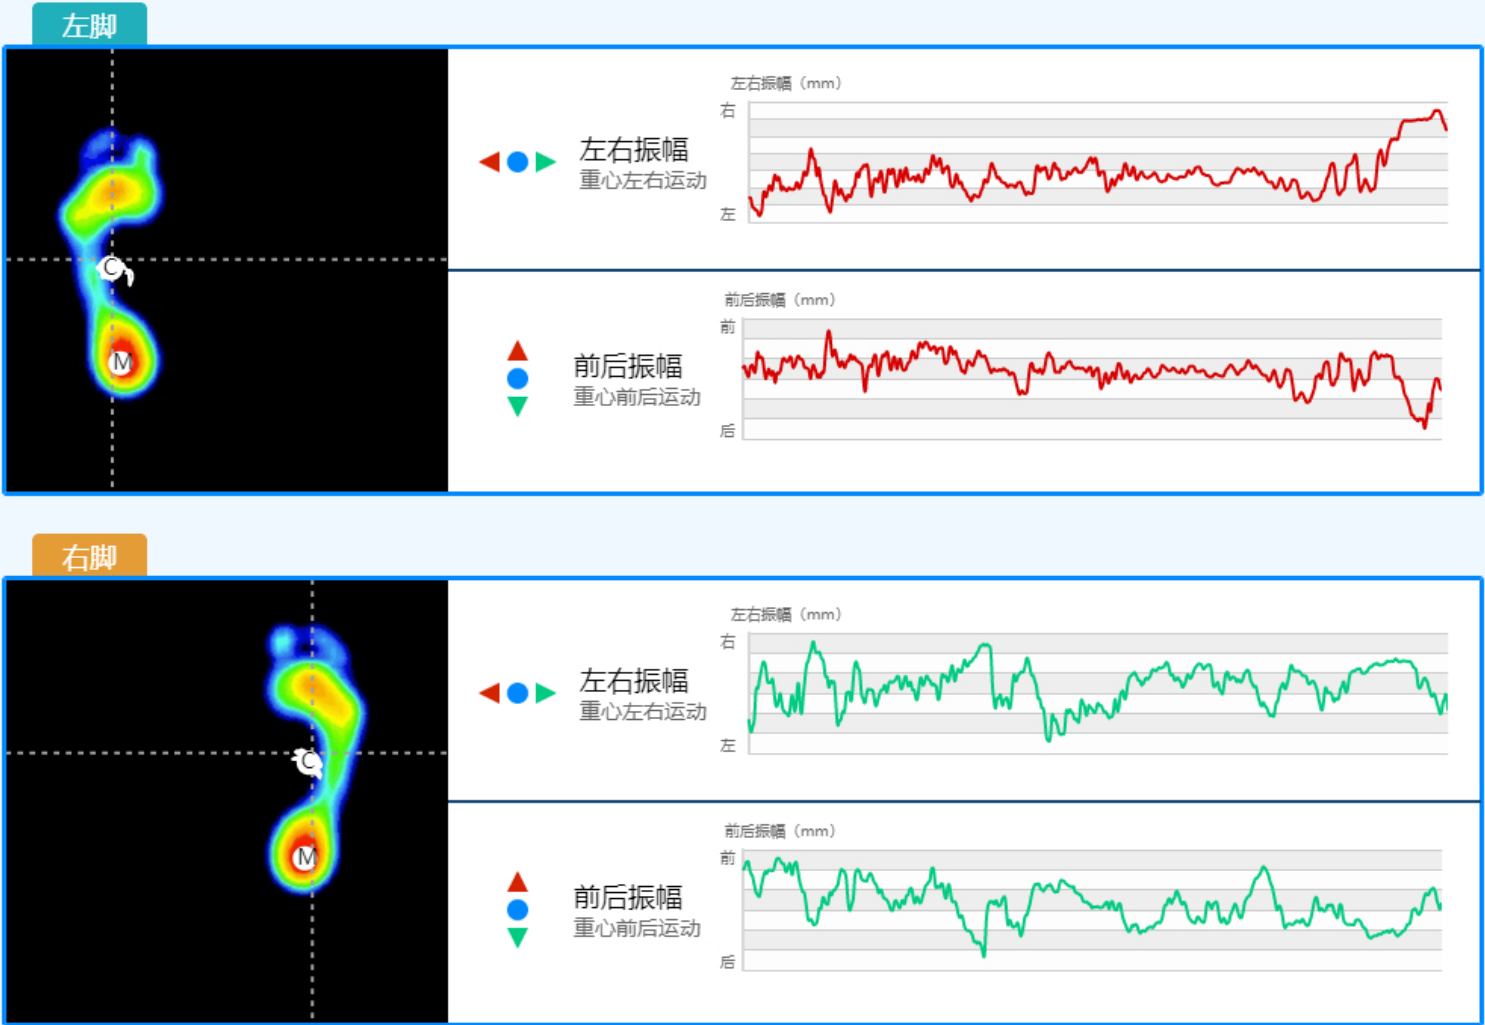

Cop数据

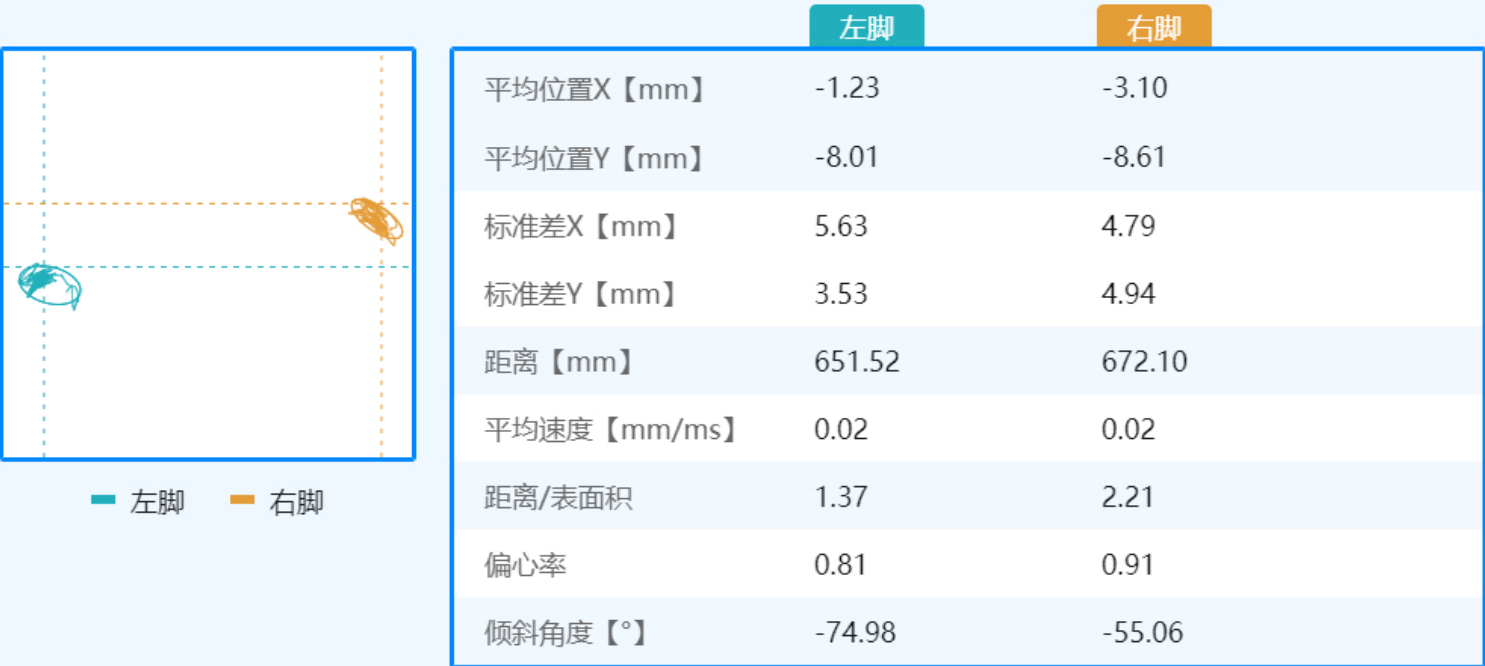

平衡报告

张佳涵 17岁 女 56.0kg 162.0cm 2025-2-26 12:20:50



报告结论

睁眼  
前后晃动比左右晃动更明显

Supplement: Supplementary file 165 [file 平衡报告-张佳涵-20250226122159.pdf › Plantar pressure and gait analysis/soccer/平衡报告-张佳涵-20250226122159.pdf]



双脚重心变化

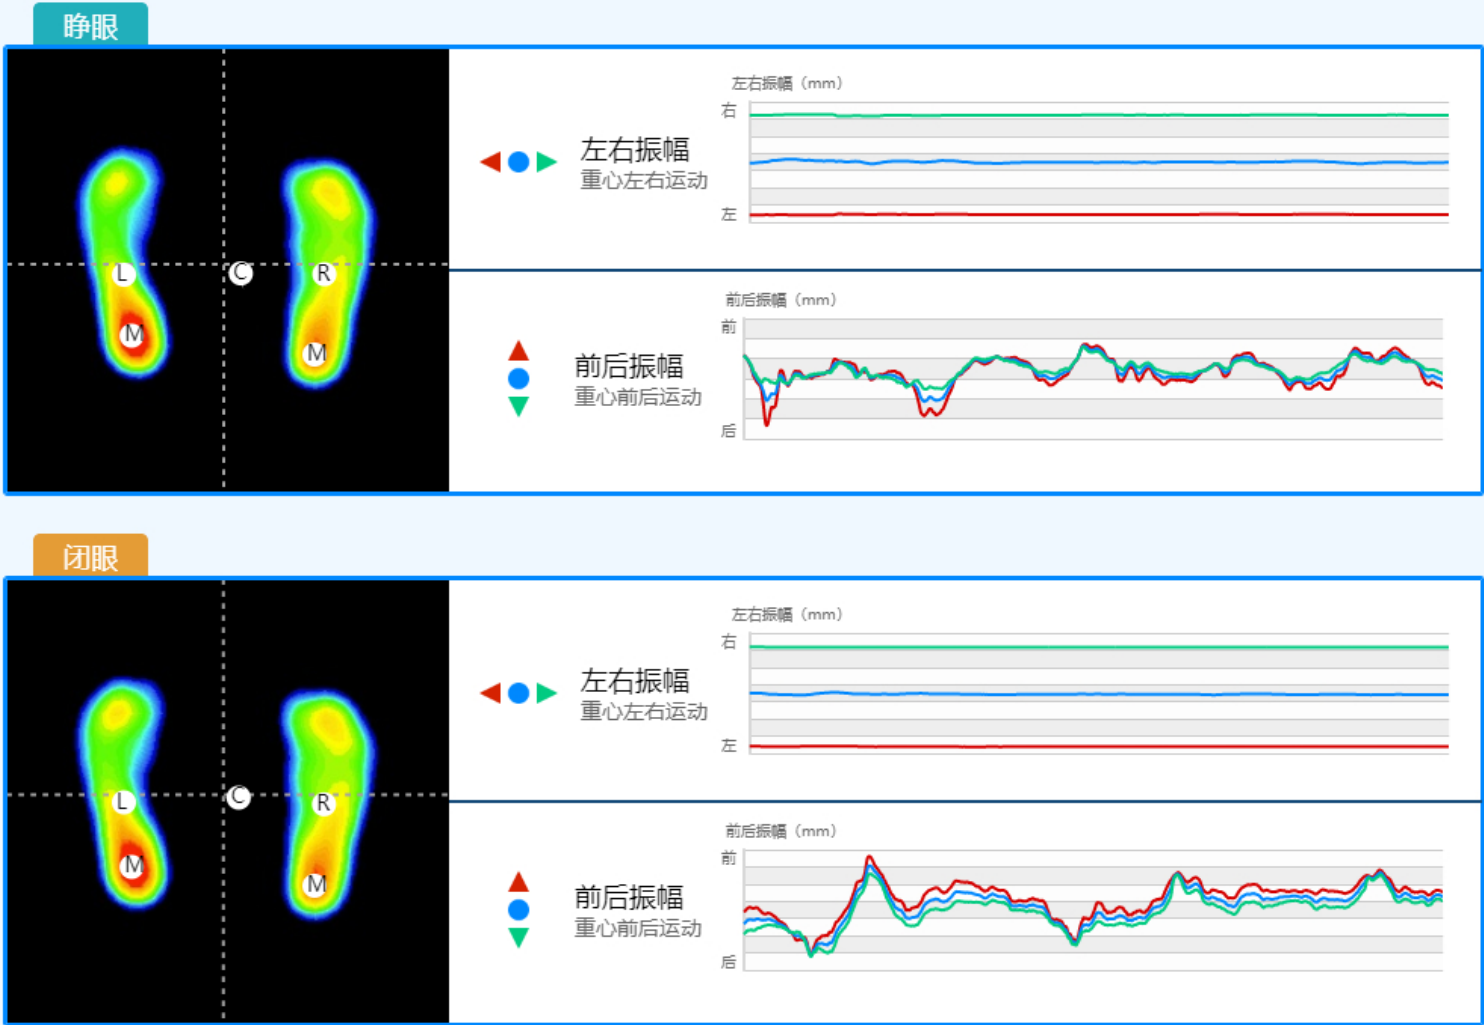

Cop数据

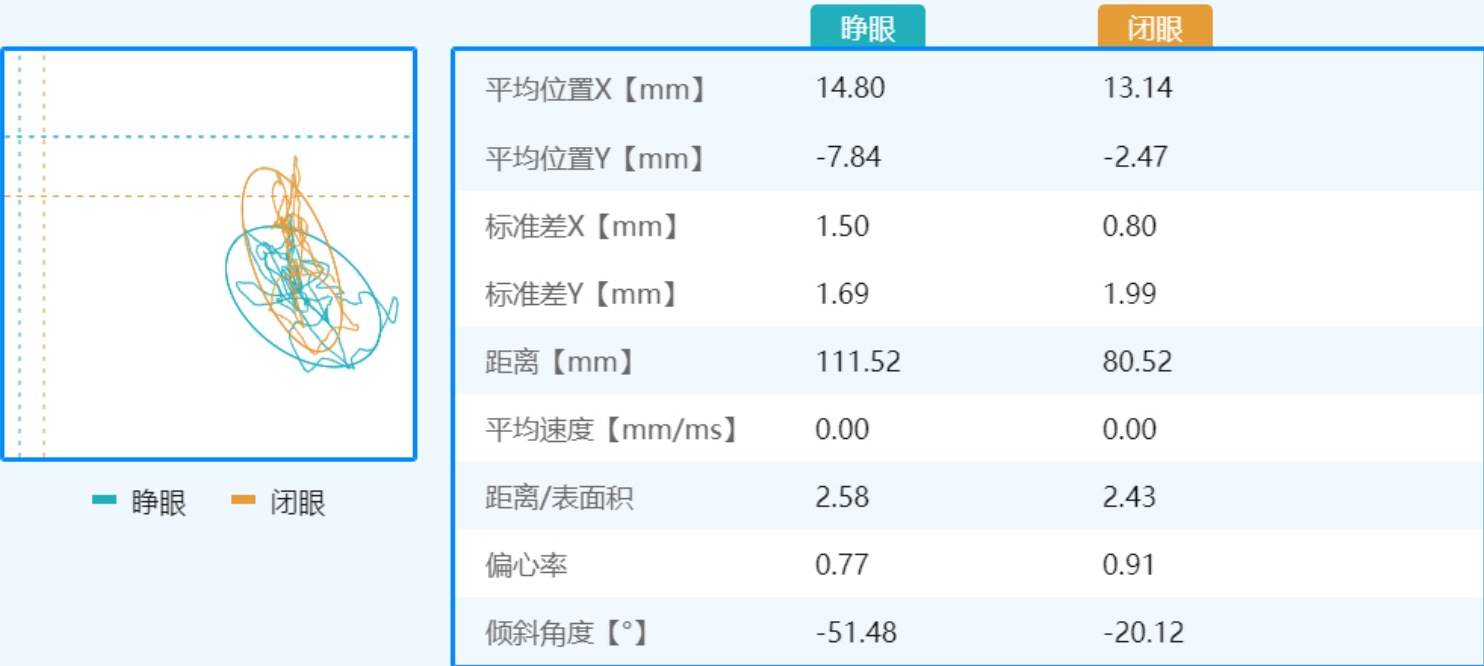

平衡报告

张旭博 20岁 男 67.0kg 169.0cm 2025-2-26 11:44:31



报告结论

睁眼  
前后晃动比左右晃动更明显  
闭眼  
前后晃动比左右晃动更明显

Supplement: Supplementary file 172 [file 平衡报告-张旭博-20250226115944.pdf › Plantar pressure and gait analysis/soccer/平衡报告-张旭博-20250226115944.pdf]



双脚重心变化

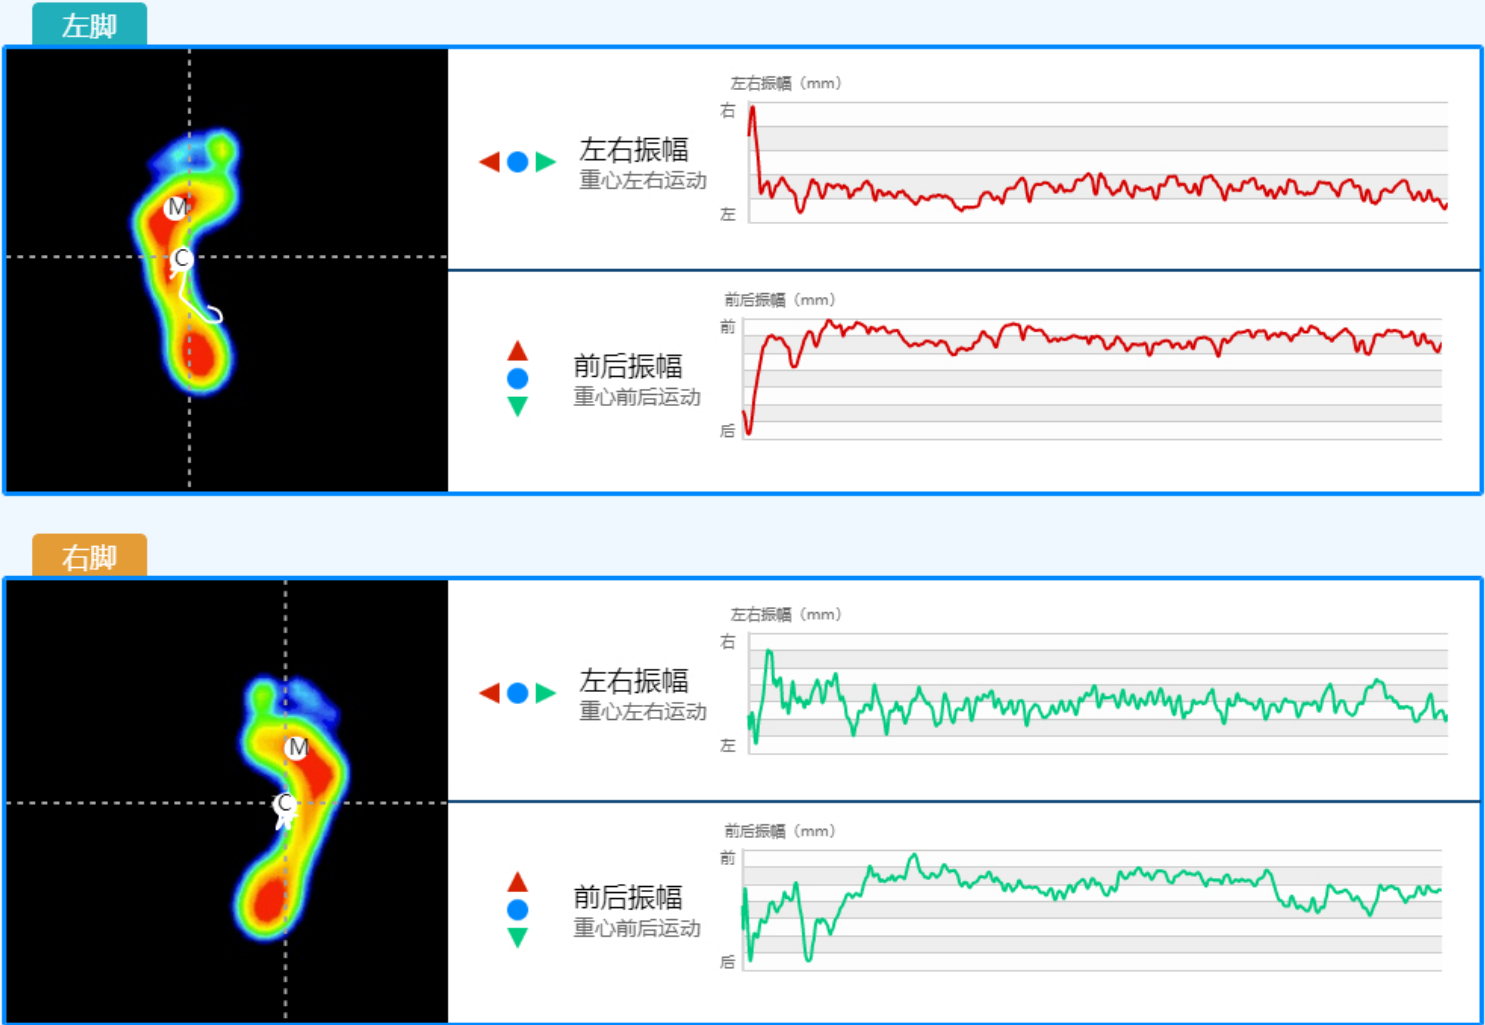

# 平衡报告

李冰冰 22岁 女 68.0kg 168.0cm 2025-2-26 14:43:25



## 报告结论

睁眼  
前后振幅大于参考值  
前后晃动比左右晃动更明显

Supplement: Supplementary file 176 [file 平衡报告-李冰冰-20250226144432.pdf › Plantar pressure and gait analysis/soccer/平衡报告-李冰冰-20250226144432.pdf]



双脚重心变化

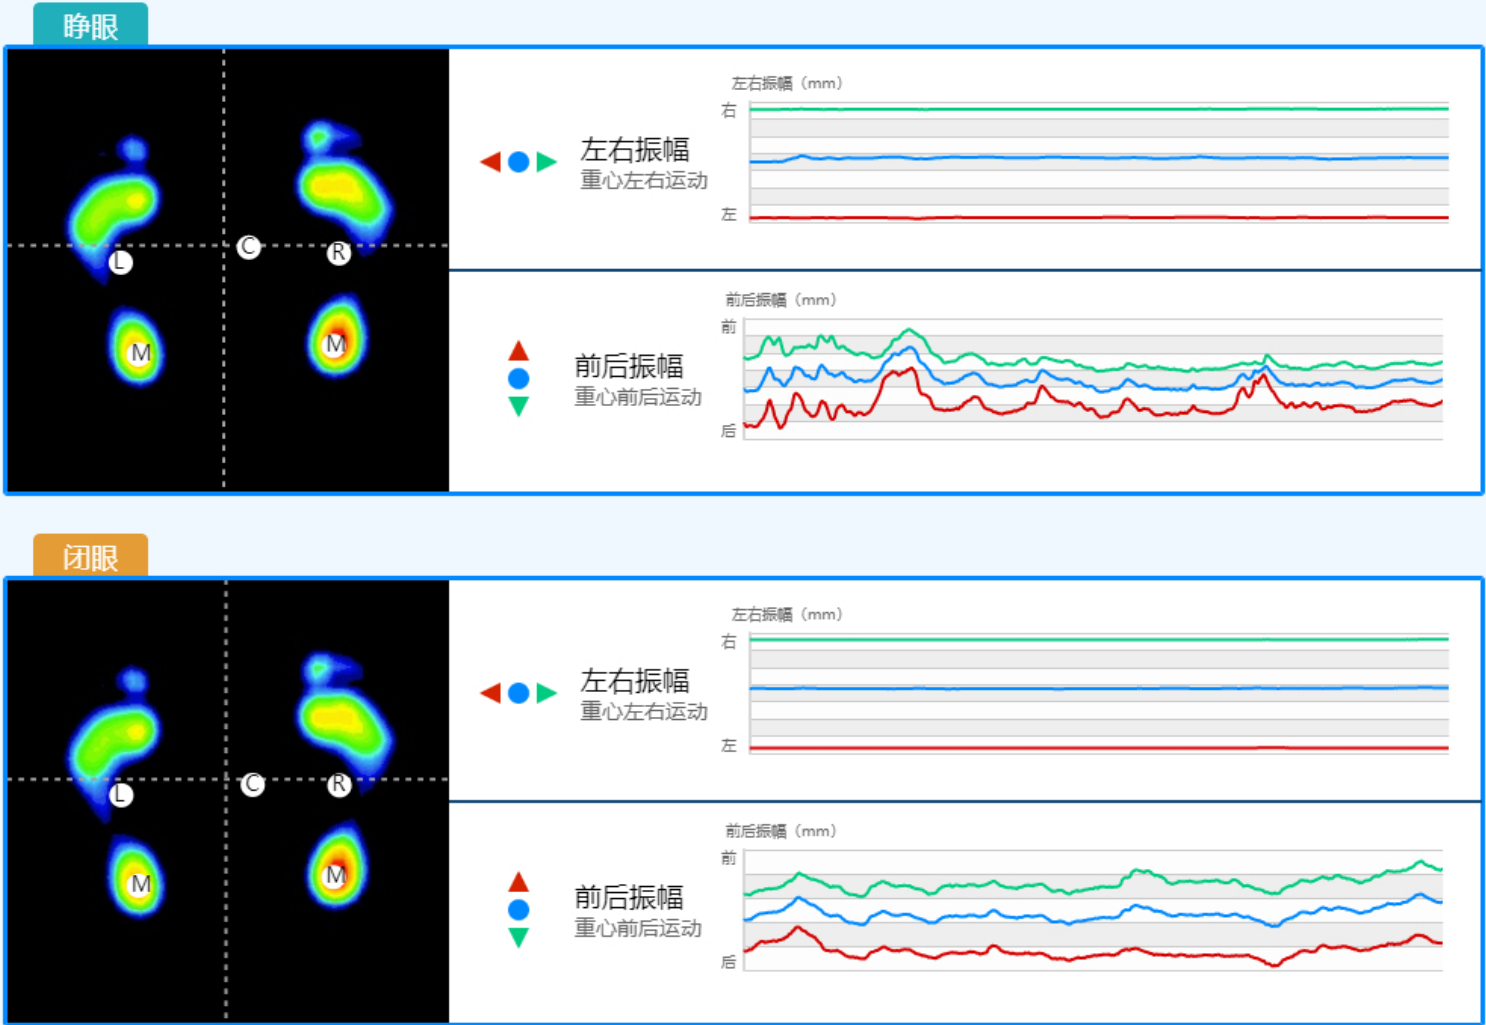

平衡报告

林茜 20岁 女 55.0kg 160.0cm 2025-2-26 09:29:40



报告结论

睁眼  
左右晃动比前后晃动更明显  
闭眼  
前后晃动比左右晃动更明显

Supplement: Supplementary file 177 [file 平衡报告-林茜-20250226093051.pdf › Plantar pressure and gait analysis/soccer/平衡报告-林茜-20250226093051.pdf]



双脚重心变化

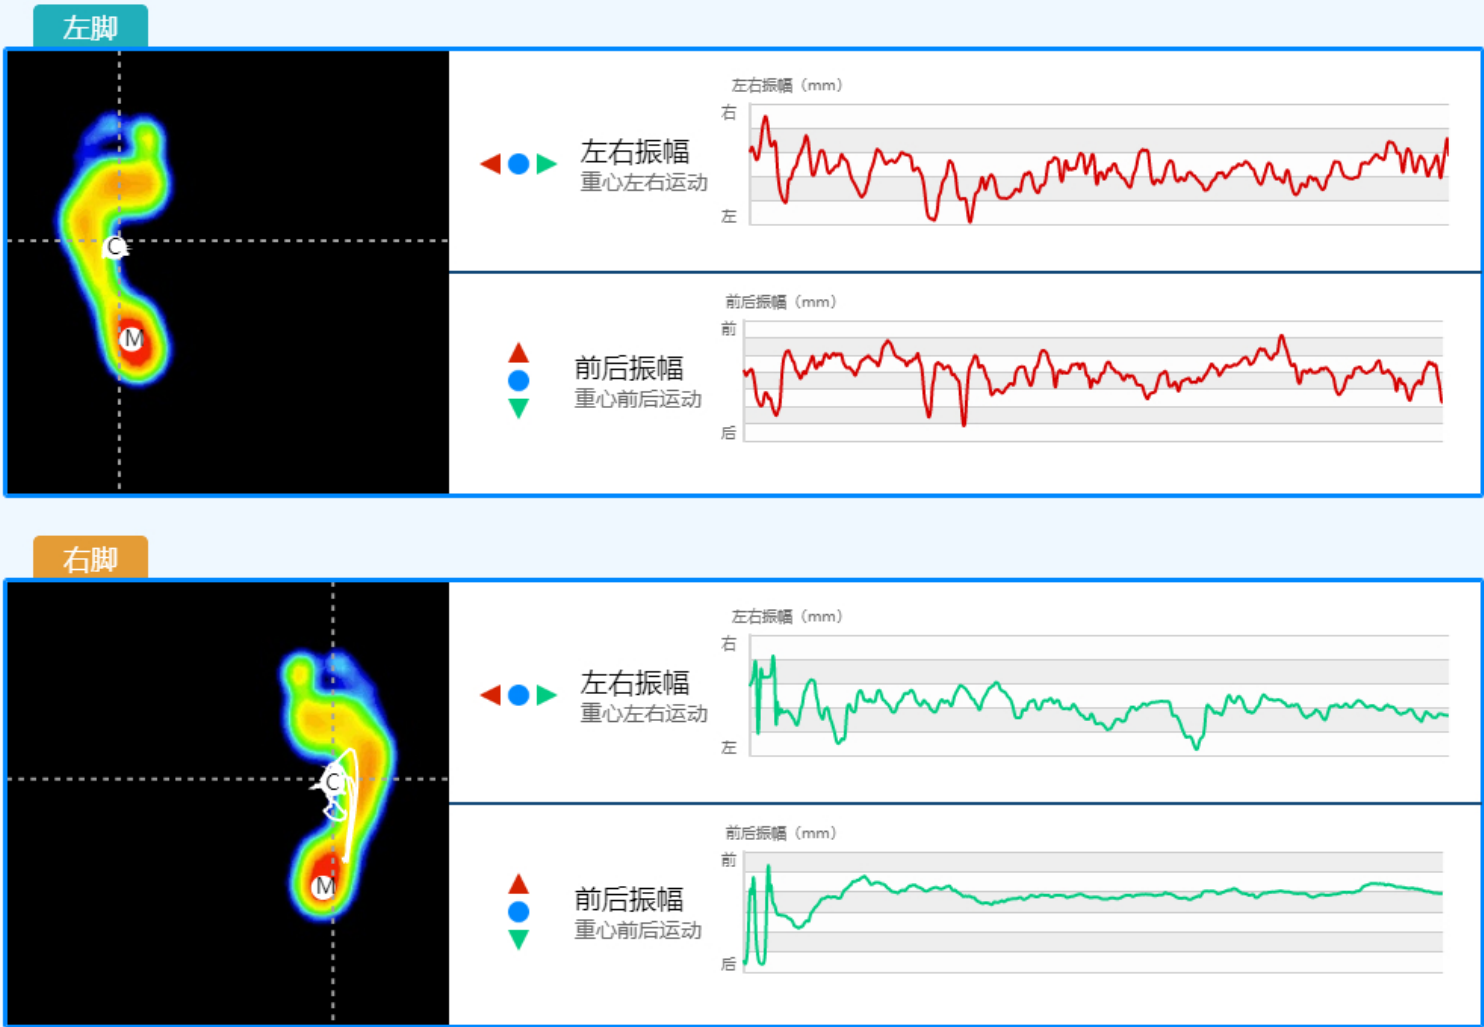

Cop数据

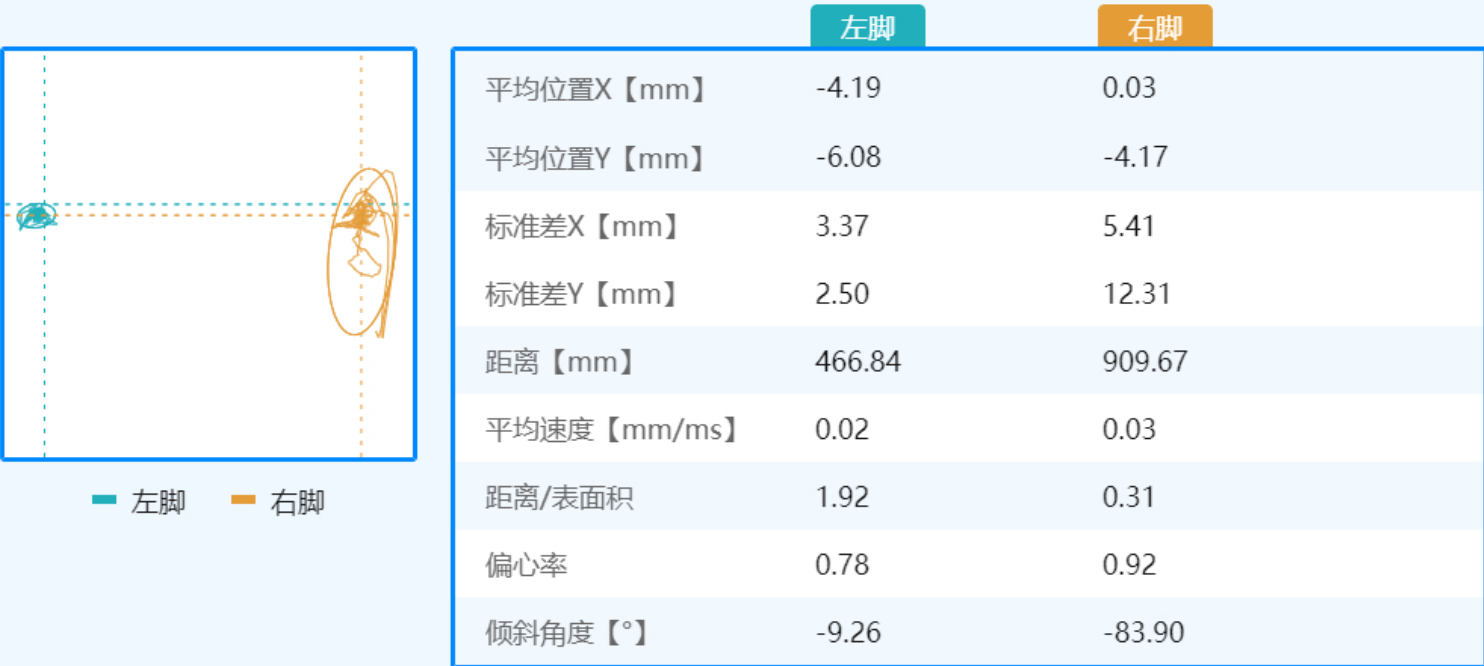

# 平衡报告

梁栋 20岁 男 73.0kg 171.0cm 2025-2-26 10:58:56



## 报告结论

睁眼  
左右振幅大于参考值  
前后振幅大于参考值  
前后晃动比左右晃动更明显

Supplement: Supplementary file 183 [file 平衡报告-梁栋-20250226110001.pdf › Plantar pressure and gait analysis/soccer/平衡报告-梁栋-20250226110001.pdf]



双脚重心变化

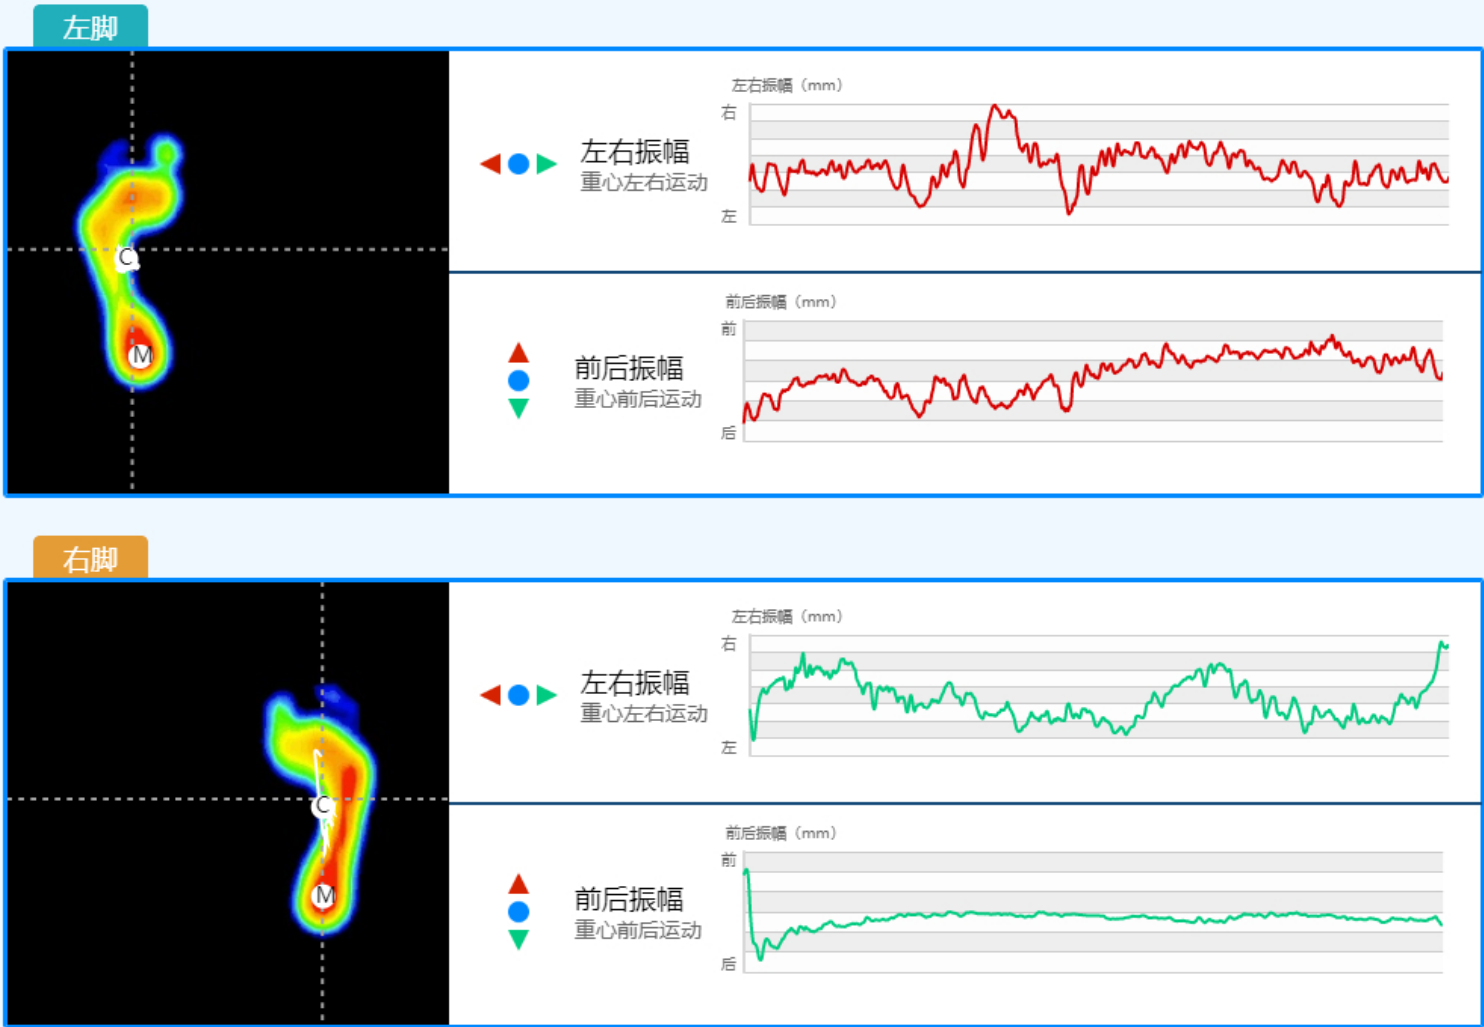

Cop数据

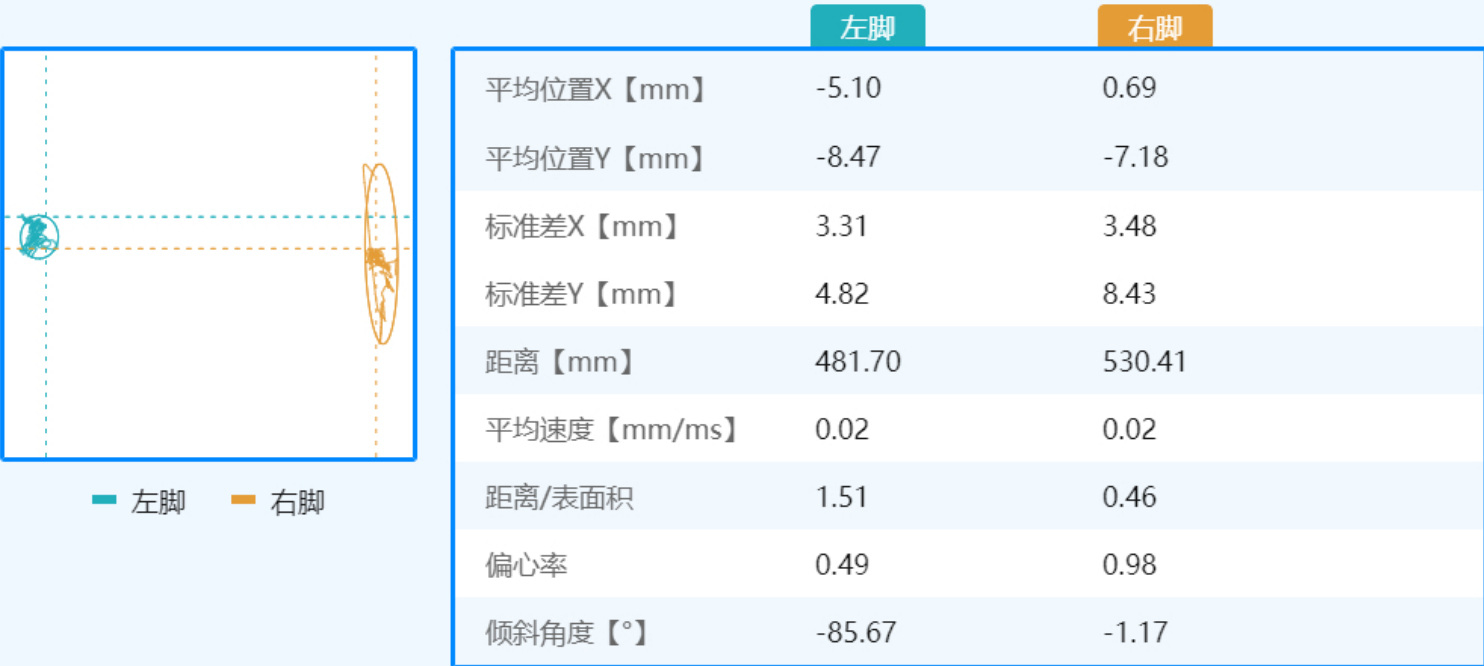

# 平衡报告

王懿佳 20岁 女 63.0kg 167.0cm 2025-2-26 11:34:10



## 报告结论

睁眼  
前后振幅大于参考值  
前后晃动比左右晃动更明显

Supplement: Supplementary file 186 [file 平衡报告-王懿佳-20250226120208.pdf › Plantar pressure and gait analysis/soccer/平衡报告-王懿佳-20250226120208.pdf]



双脚重心变化

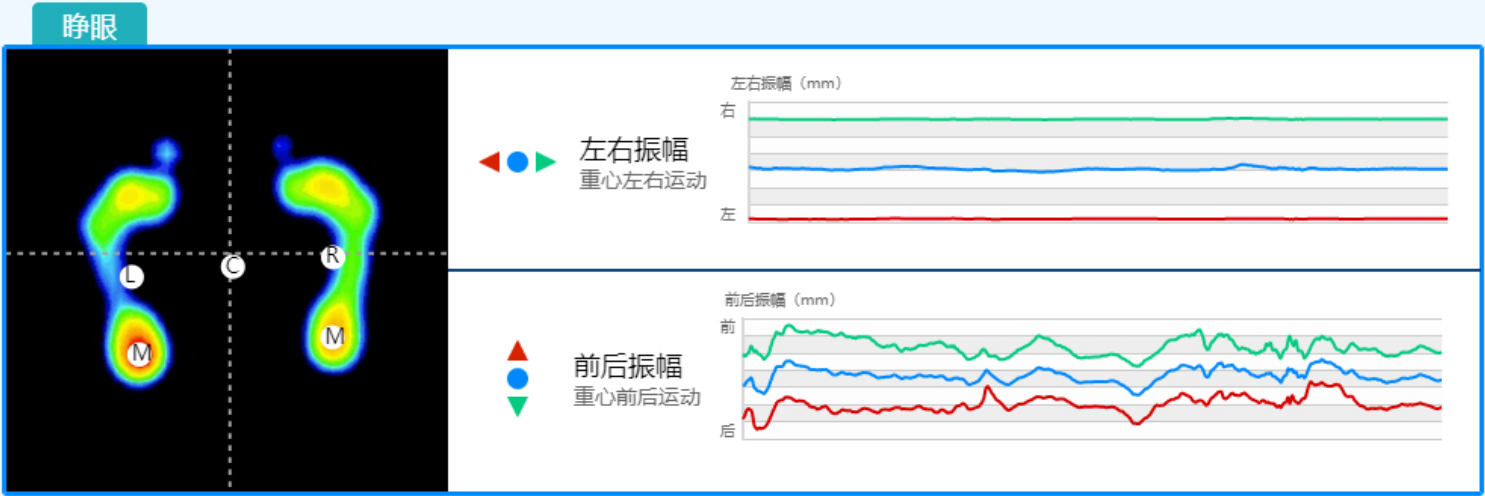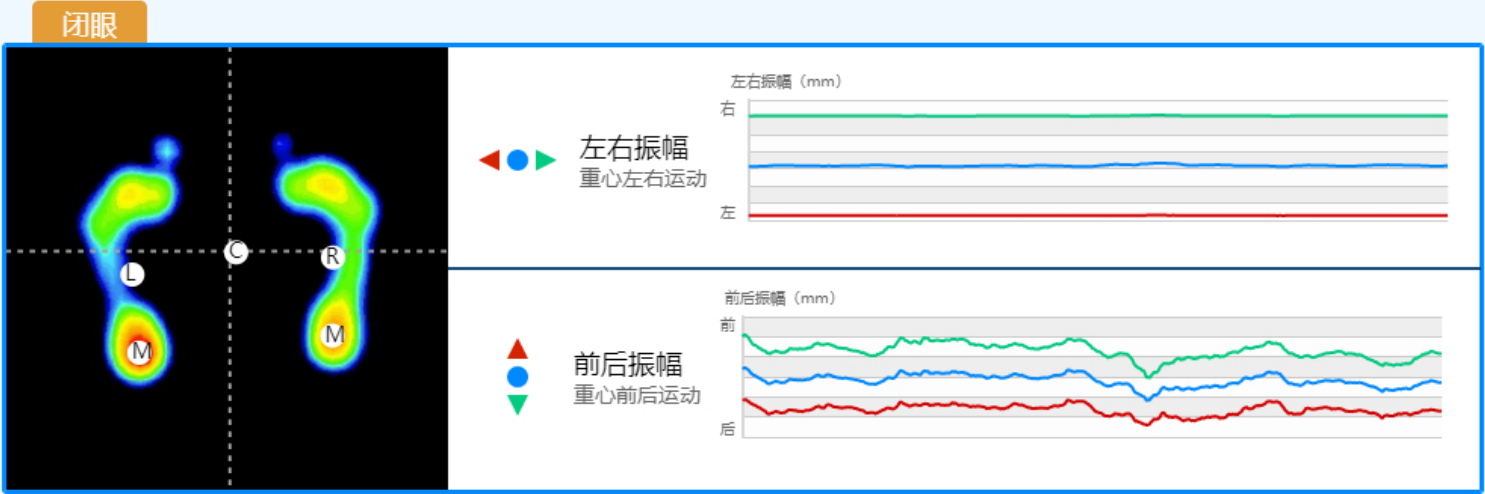

Cop数据

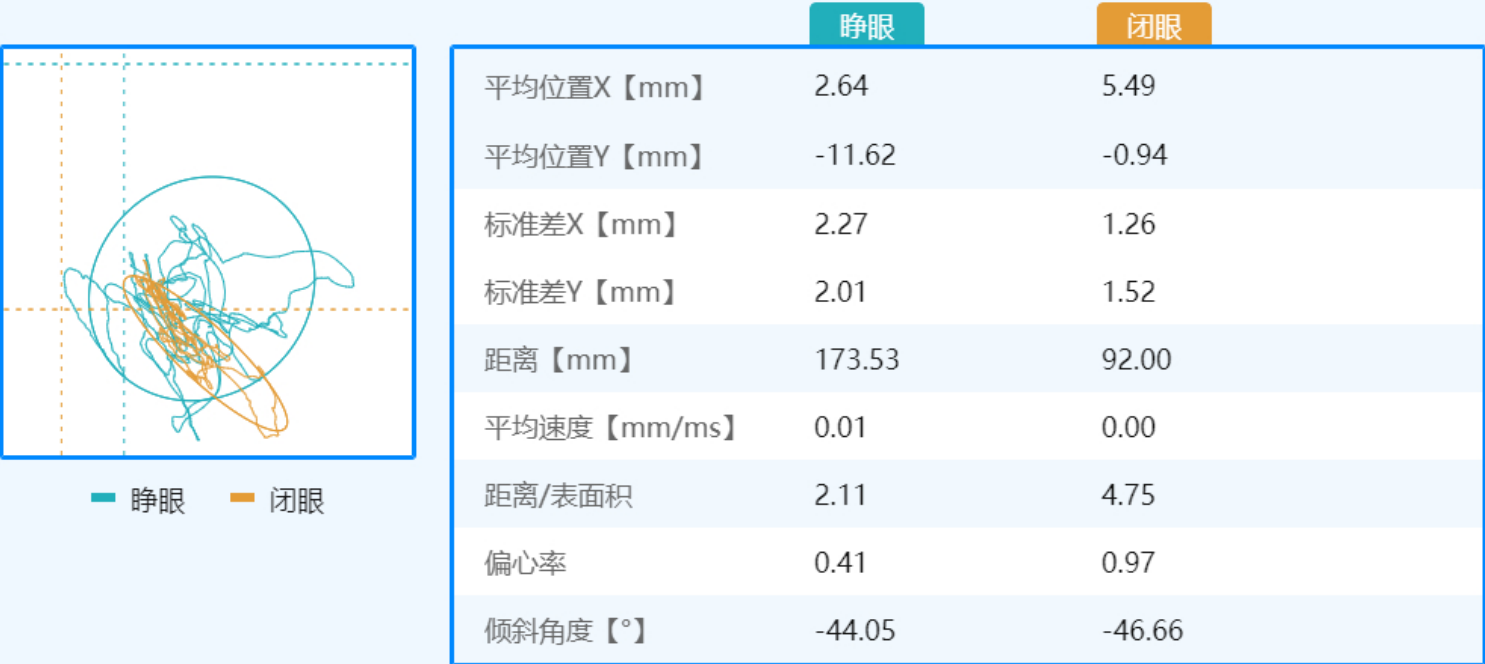

平衡报告

王懿佳 20岁 女 63.0kg 167.0cm 2025-2-26 11:32:35



报告结论

睁眼  
左右晃动比前后晃动更明显  
闭眼  
前后晃动比左右晃动更明显

Supplement: Supplementary file 187 [file 平衡报告-王懿佳-20250226120220.pdf › Plantar pressure and gait analysis/soccer/平衡报告-王懿佳-20250226120220.pdf]



双脚重心变化

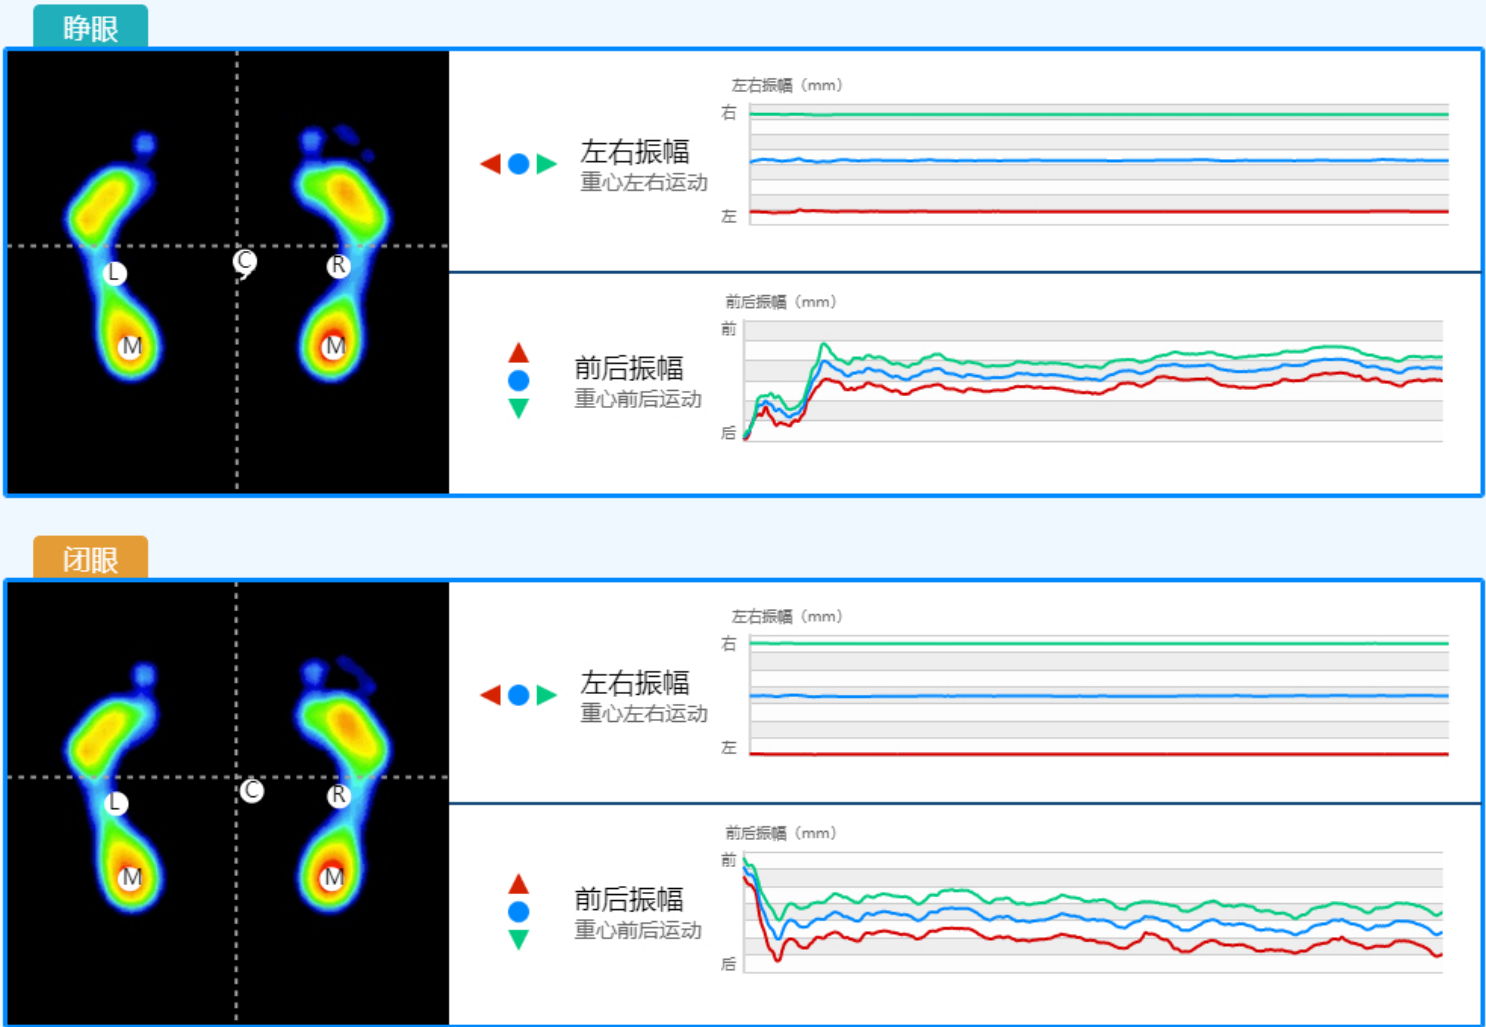

Cop数据

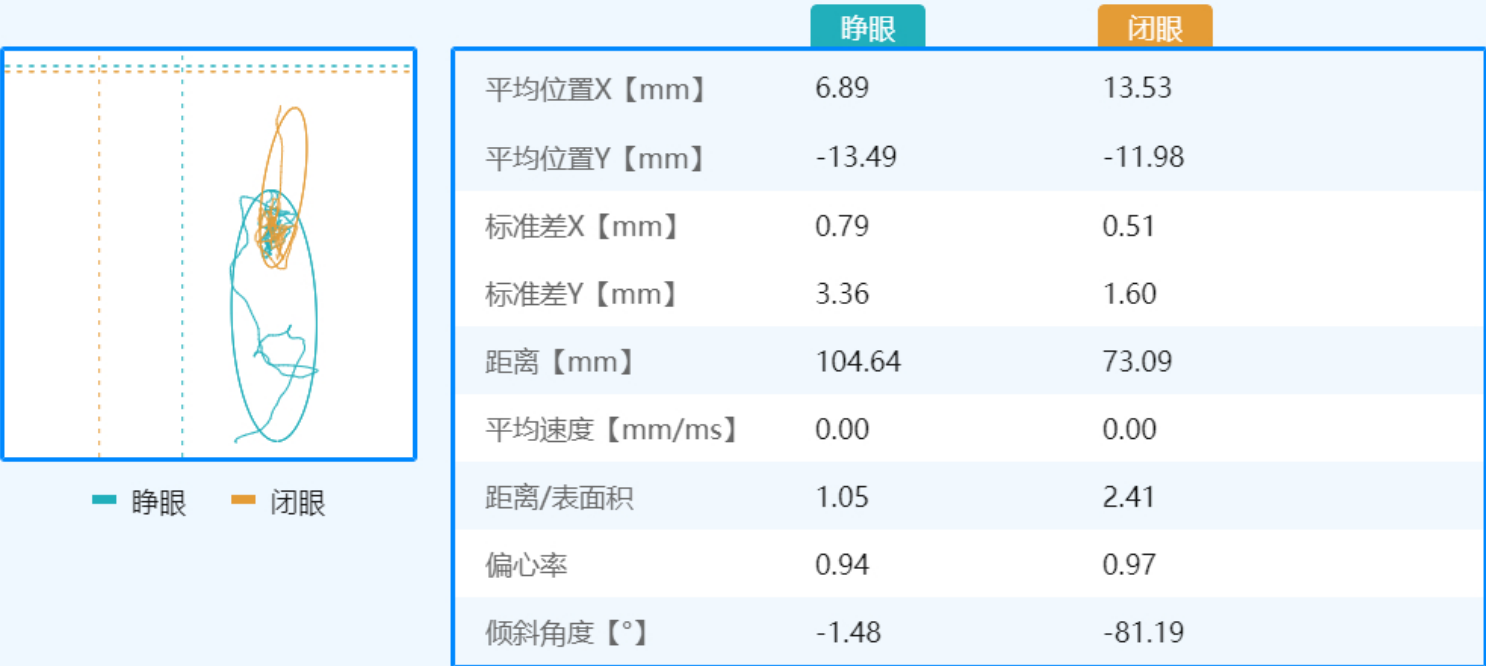

# 平衡报告

王欣鑫 21岁 女 60.0kg 168.0cm 2025-2-26 13:35:46

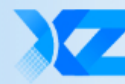

## 报告结论

睁眼  
前后晃动比左右晃动更明显  
闭眼  
身体重心位于右后方，骨盆右旋  
前后晃动比左右晃动更明显

Supplement: Supplementary file 190 [file 平衡报告-王欣鑫-20250226133652.pdf › Plantar pressure and gait analysis/soccer/平衡报告-王欣鑫-20250226133652.pdf]

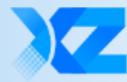

双脚重心变化

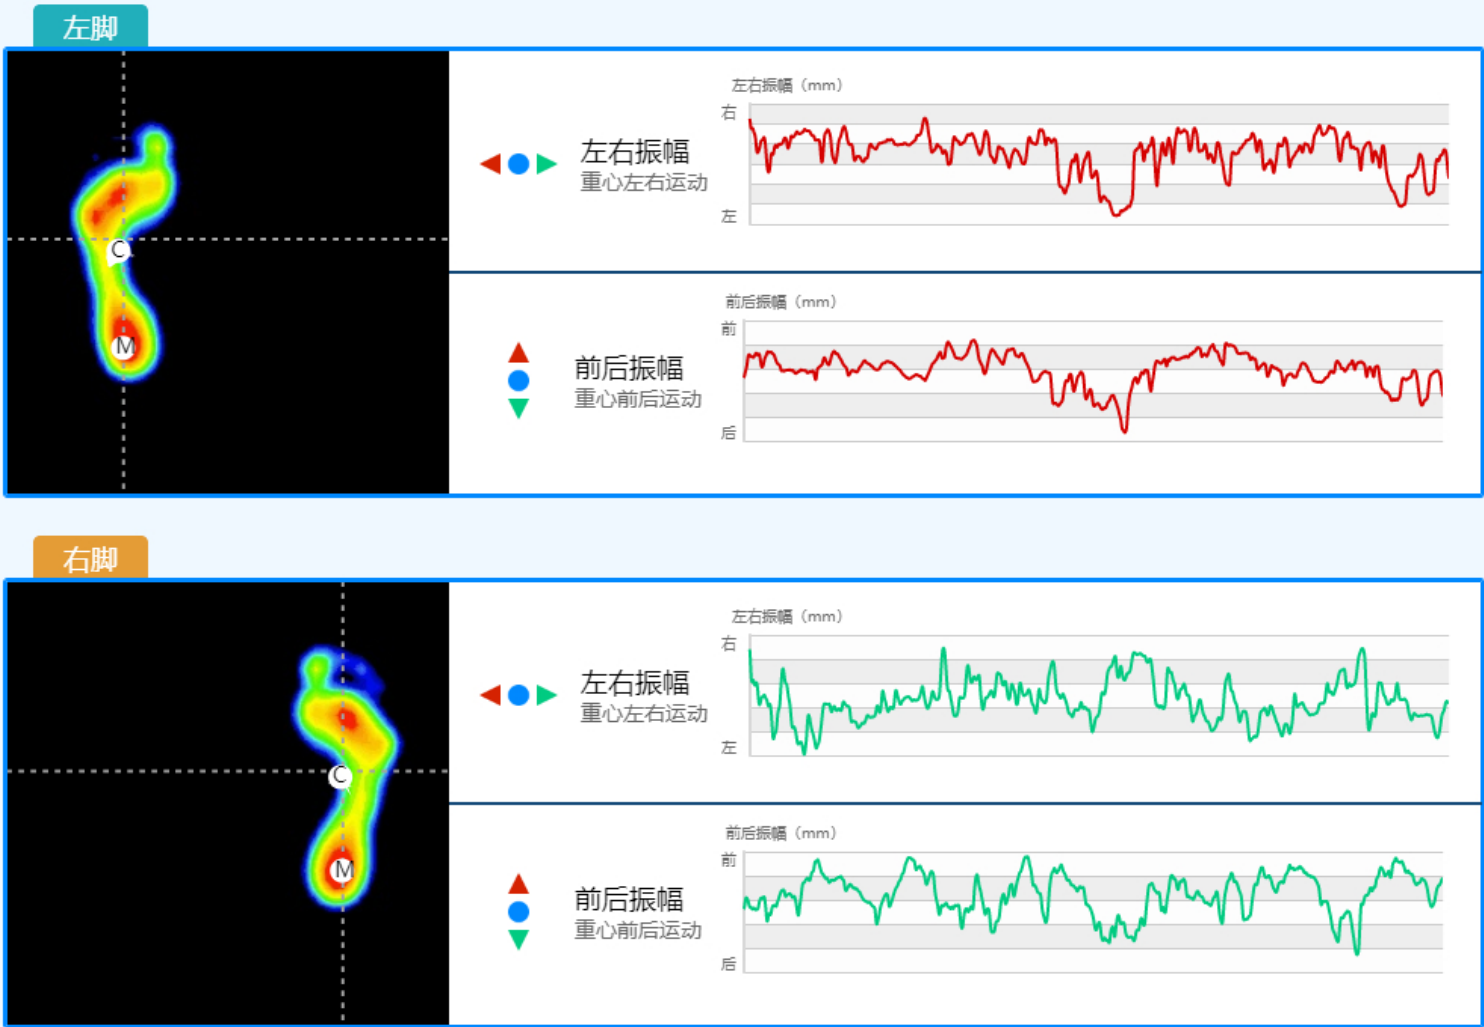

Cop数据

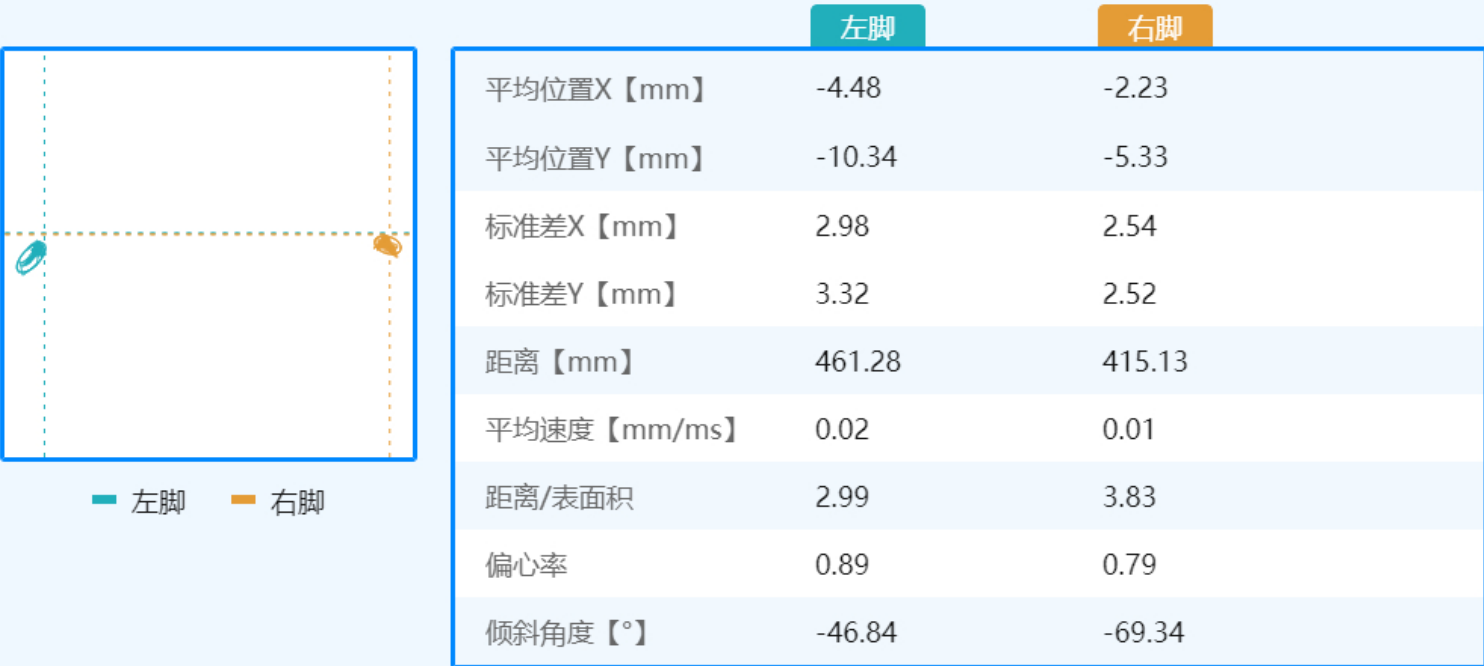

平衡报告

王欣鑫 21岁 女 60.0kg 168.0cm 2025-2-26 13:37:04



报告结论

睁眼  
左右晃动比前后晃动更明显

Supplement: Supplementary file 191 [file 平衡报告-王欣鑫-20250226133815.pdf › Plantar pressure and gait analysis/soccer/平衡报告-王欣鑫-20250226133815.pdf]



双脚重心变化

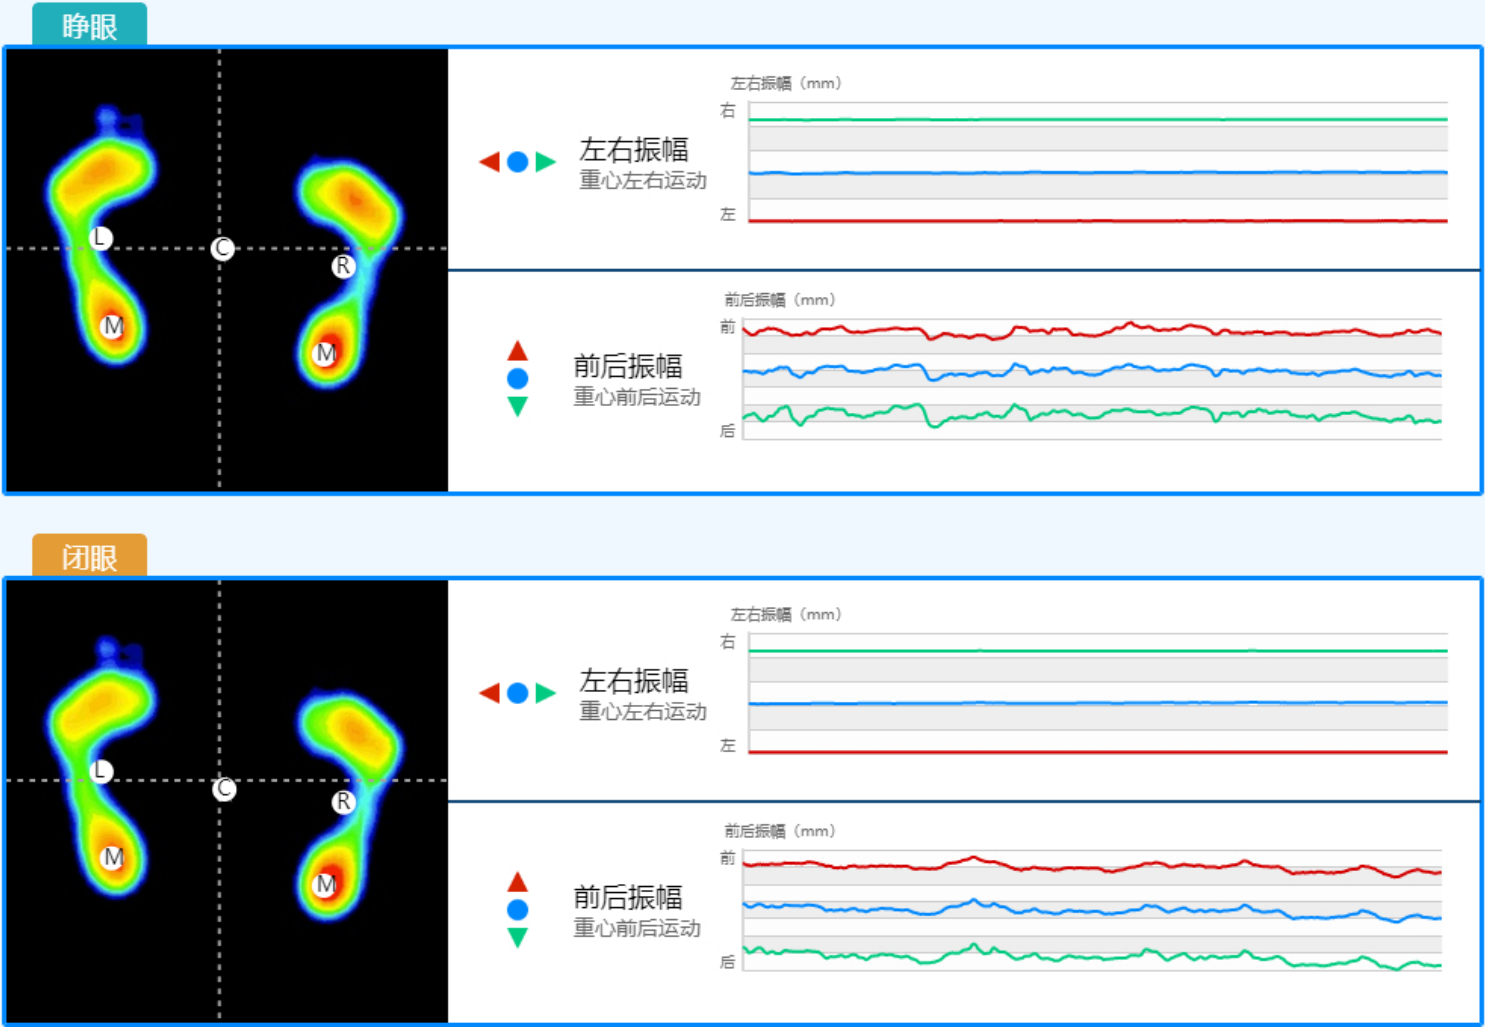

Cop数据

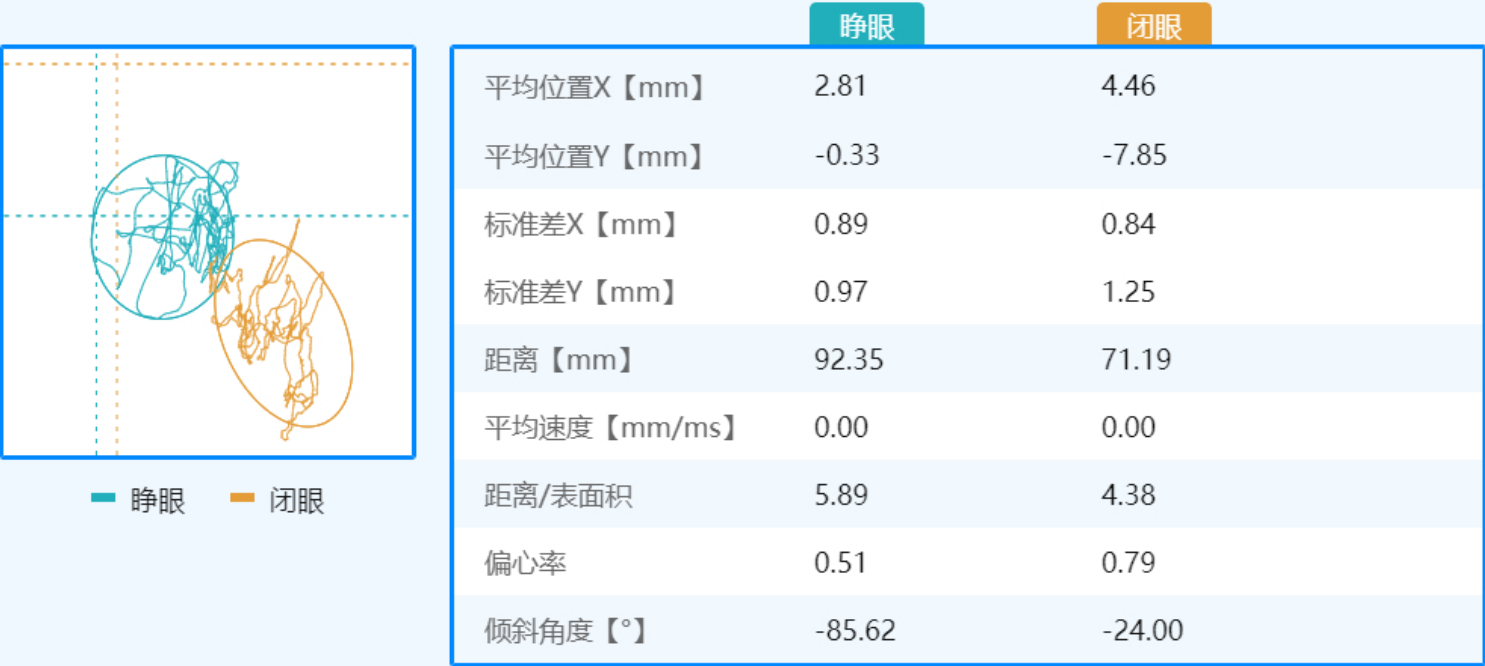

平衡报告

王珊珊 20岁 女 66.0kg 166.0cm 2025-2-26 12:34:10



报告结论

睁眼  
前后晃动比左右晃动更明显  
闭眼  
前后晃动比左右晃动更明显

Supplement: Supplementary file 192 [file 平衡报告-王珊珊-20250226123518.pdf › Plantar pressure and gait analysis/soccer/平衡报告-王珊珊-20250226123518.pdf]

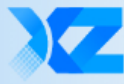

双脚重心变化

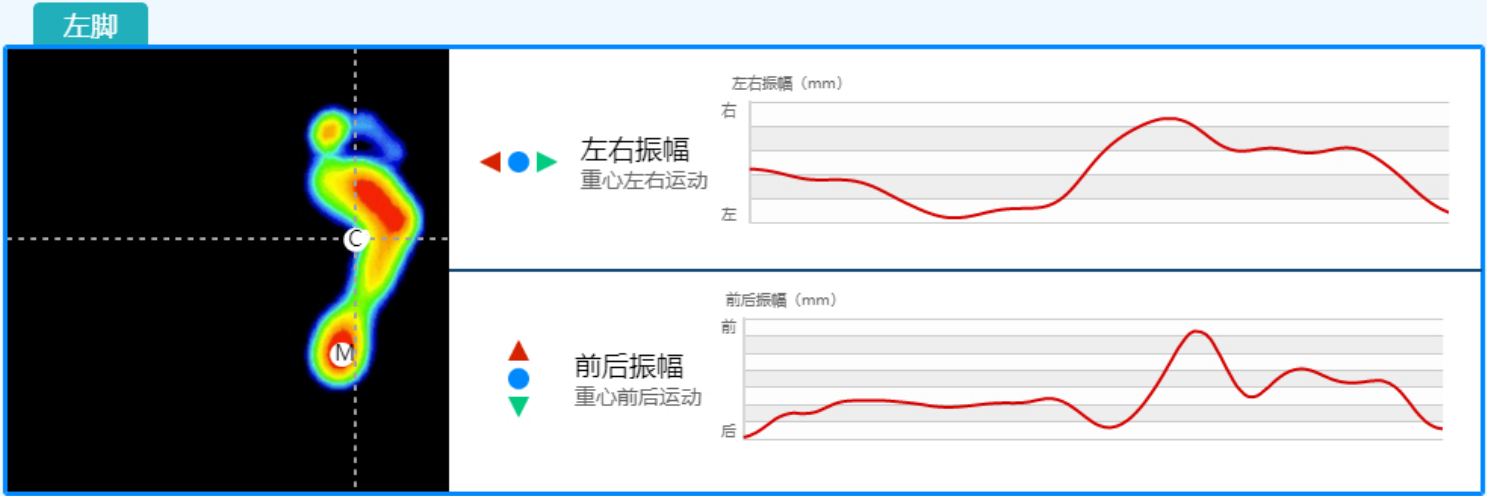

Cop数据

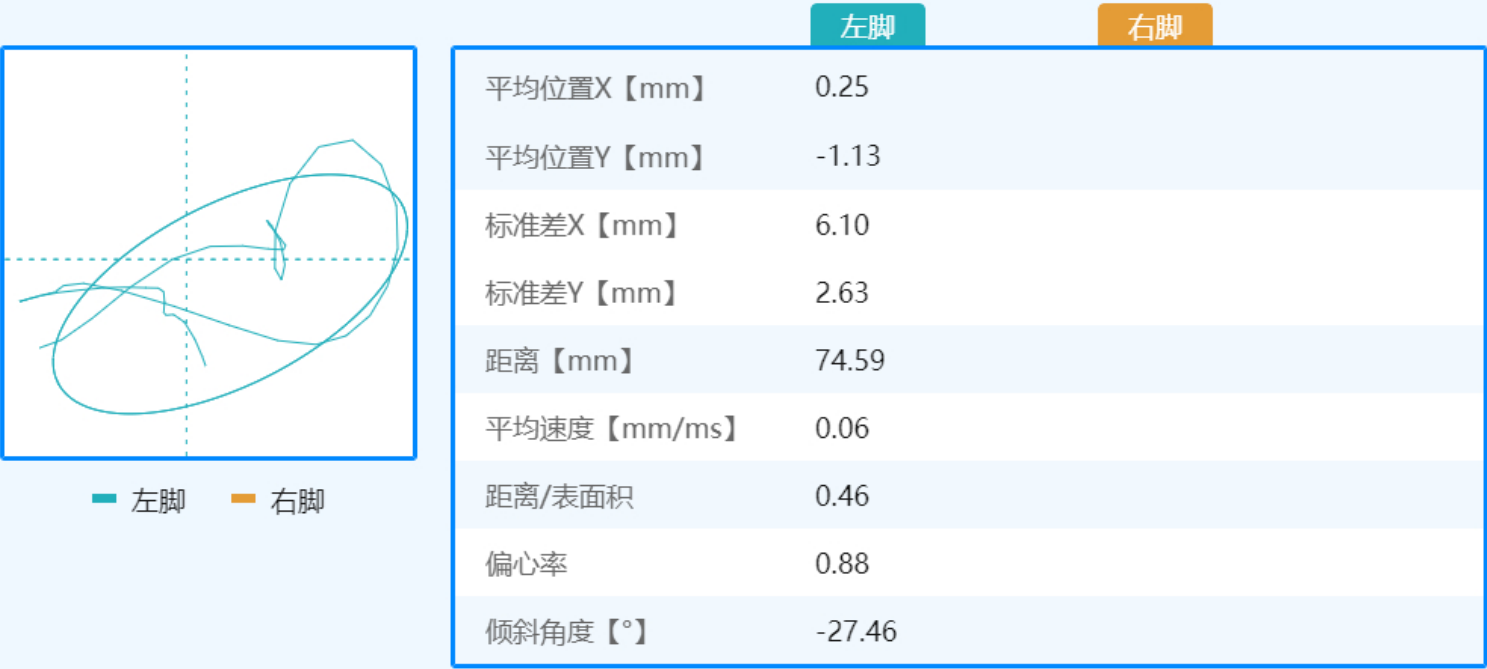

报告结论

睁眼  
左右振幅大于参考值  
左右晃动比前后晃动更明显

Supplement: Supplementary file 196 [file 平衡报告-王舒畅-20250226104753.pdf › Plantar pressure and gait analysis/soccer/平衡报告-王舒畅-20250226104753.pdf]



双脚重心变化

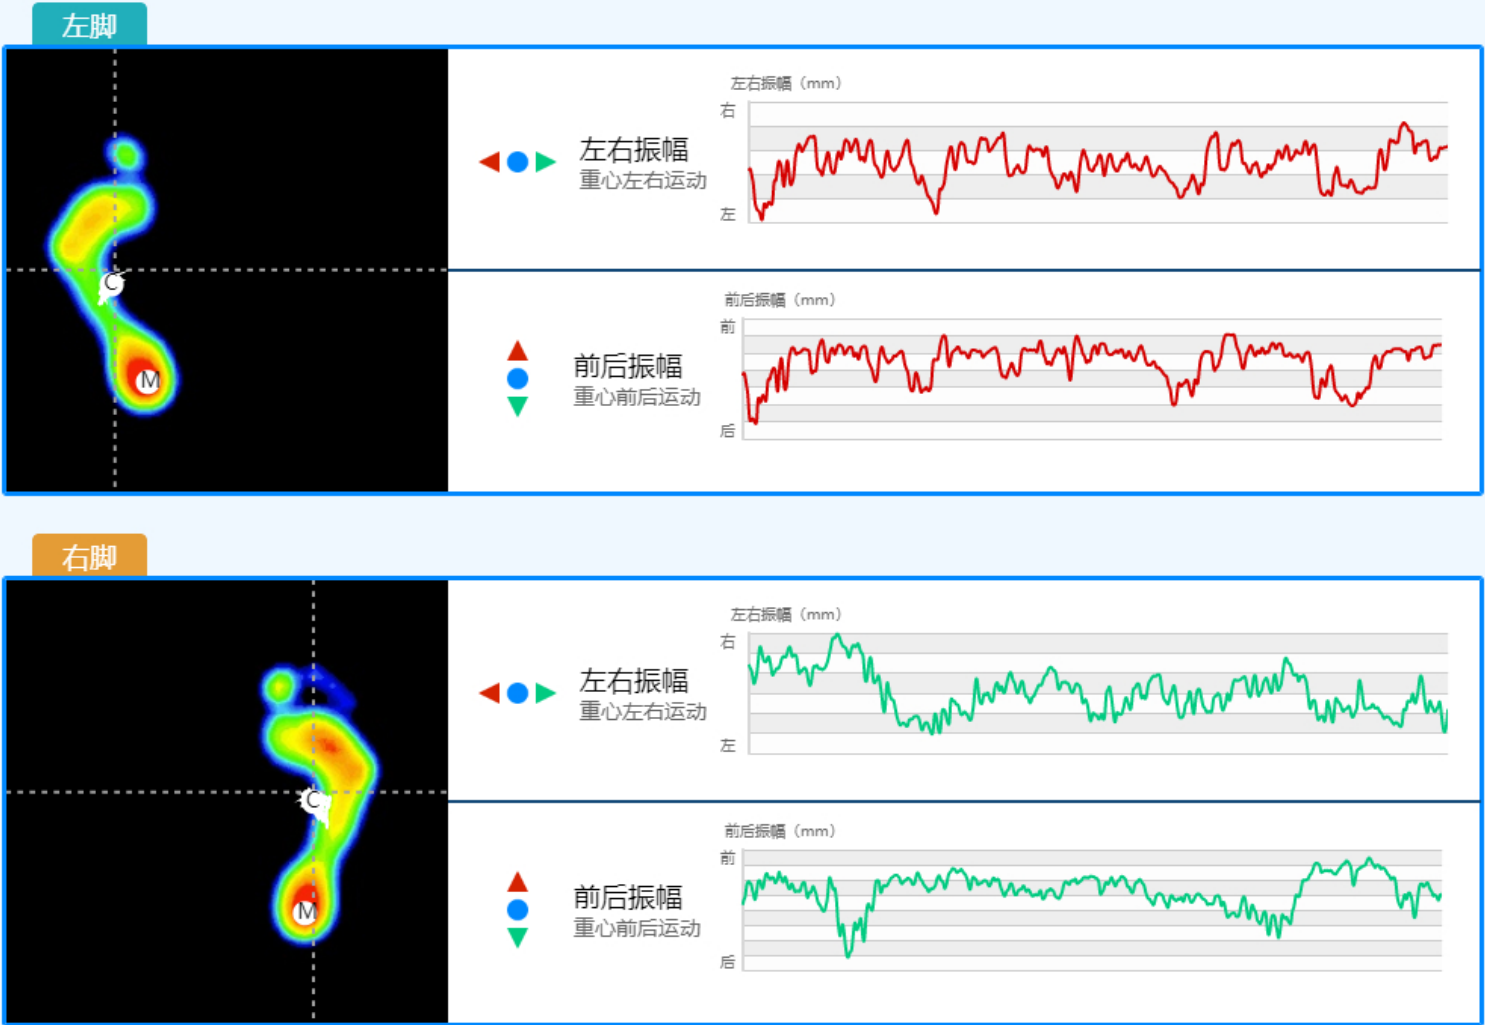

# 平衡报告

王舒畅 19岁 男 75.0kg 178.0cm 2025-2-26 10:48:01



## 报告结论

睁眼  
左右振幅大于参考值  
前后振幅大于参考值  
前后晃动比左右晃动更明显

Supplement: Supplementary file 197 [file 平衡报告-王舒畅-20250226104907.pdf › Plantar pressure and gait analysis/soccer/平衡报告-王舒畅-20250226104907.pdf]



双脚重心变化

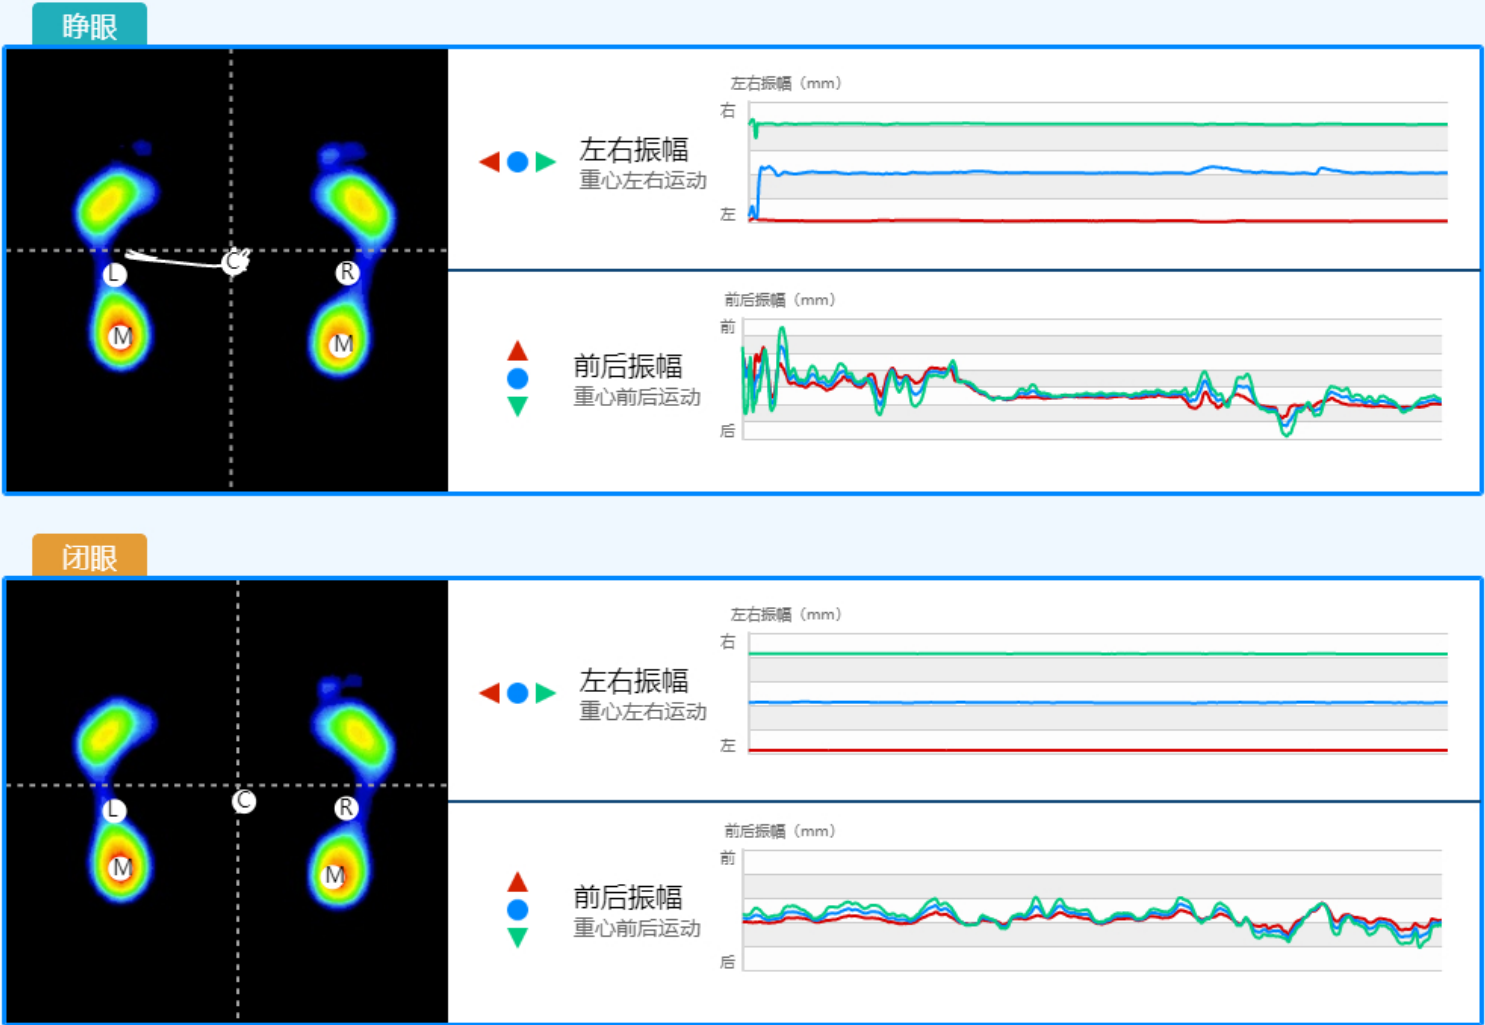

Cop数据

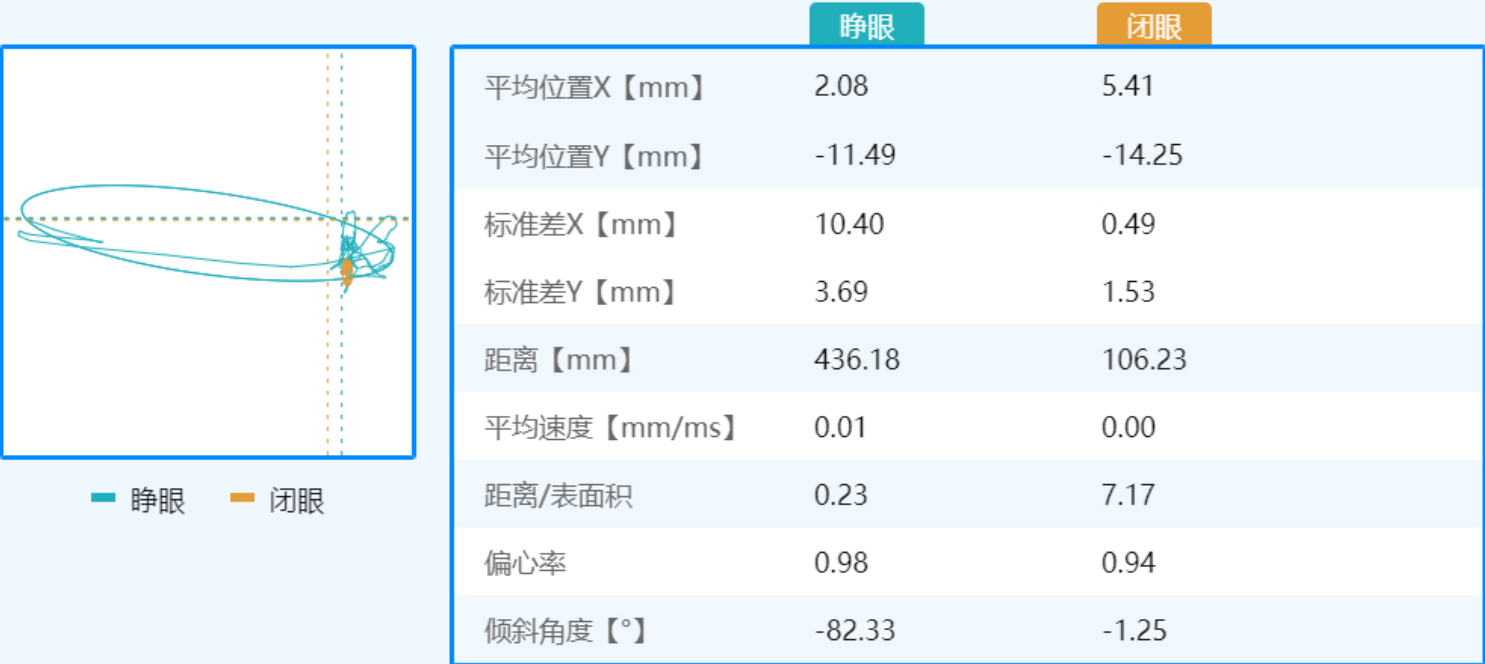

# 平衡报告

白立慧 20岁 女 48.0kg 161.0cm 2025-2-26 11:14:49



## 报告结论

睁眼  
左右振幅大于参考值  
左右晃动比前后晃动更明显  
闭眼  
前后晃动比左右晃动更明显

Supplement: Supplementary file 198 [file 平衡报告-白立慧-20250226111555.pdf › Plantar pressure and gait analysis/soccer/平衡报告-白立慧-20250226111555.pdf]

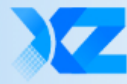

双脚重心变化

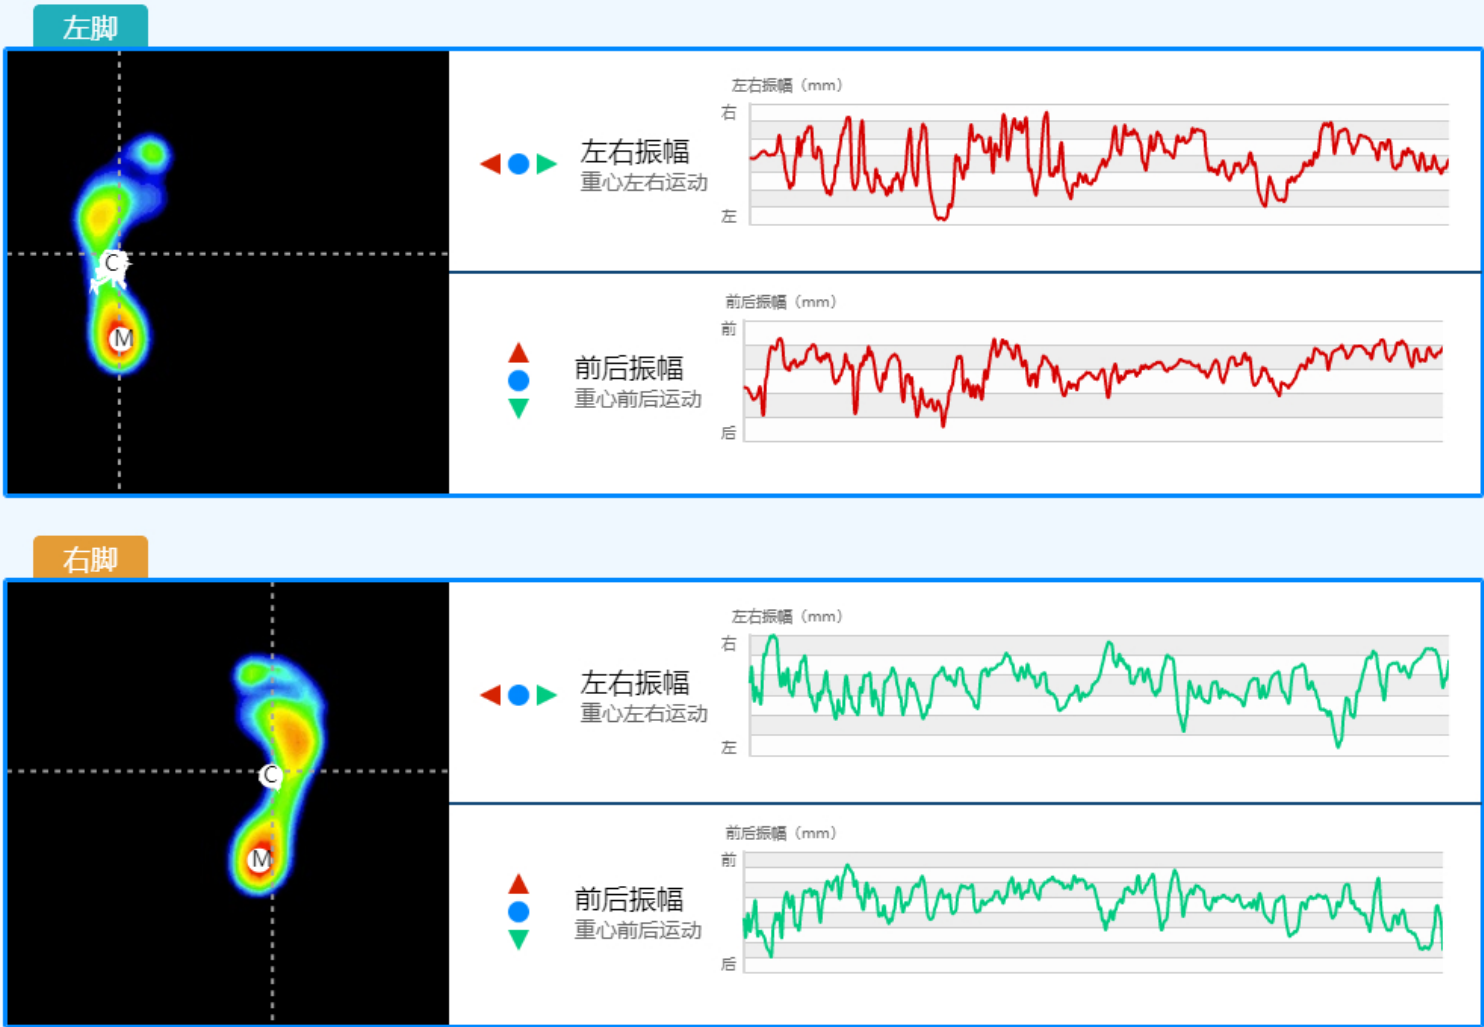

Cop数据

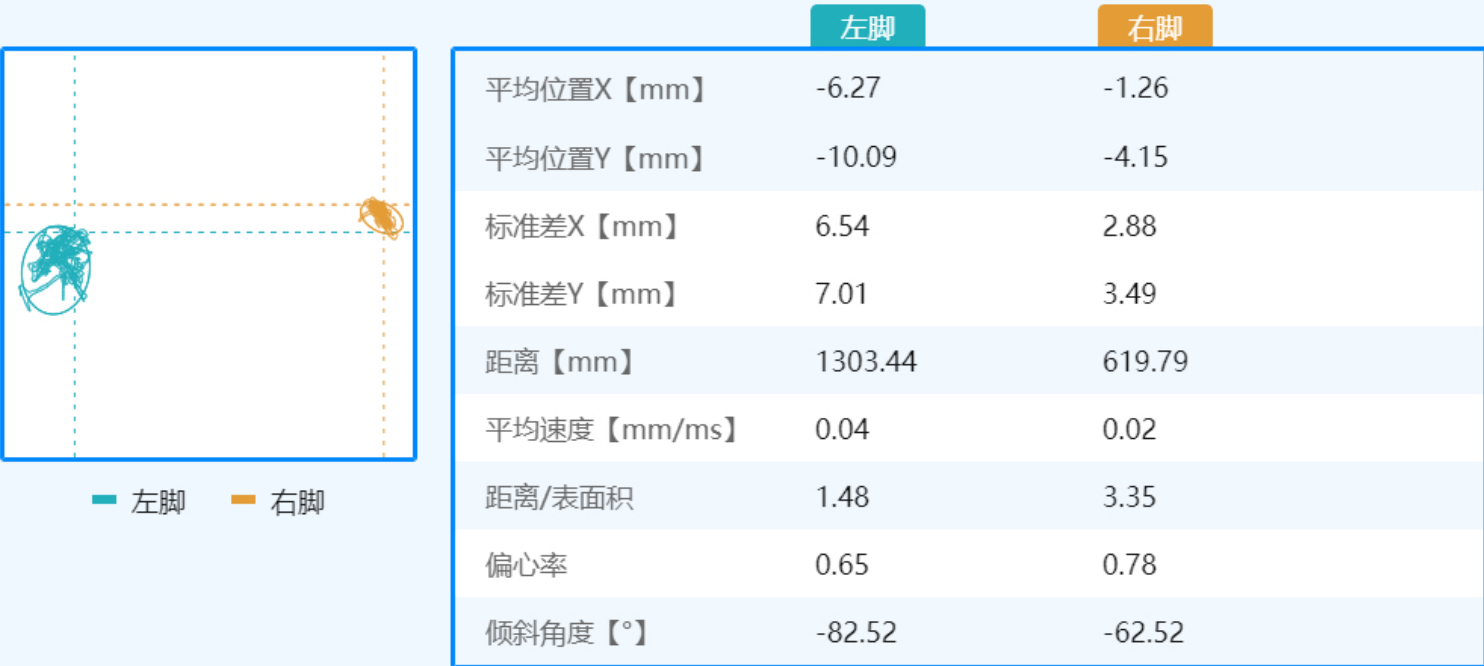

平衡报告

白立慧 20岁 女 48.0kg 161.0cm 2025-2-26 11:16:04



报告结论

睁眼  
前后晃动比左右晃动更明显

Supplement: Supplementary file 199 [file 平衡报告-白立慧-20250226111712.pdf › Plantar pressure and gait analysis/soccer/平衡报告-白立慧-20250226111712.pdf]



双脚重心变化

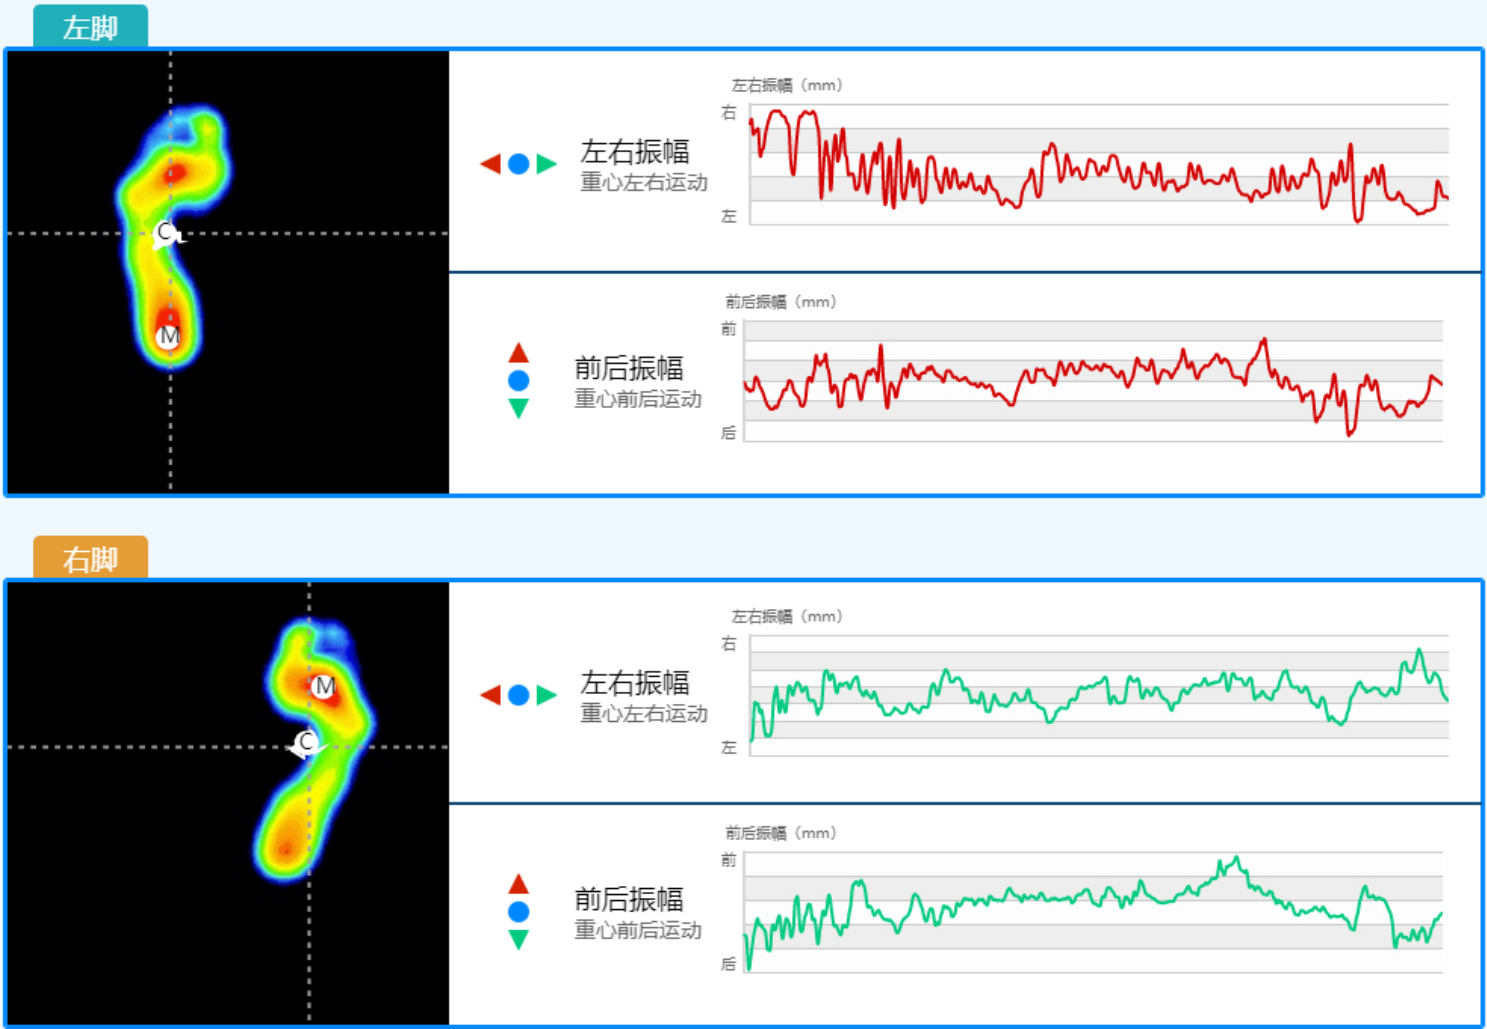

Cop数据

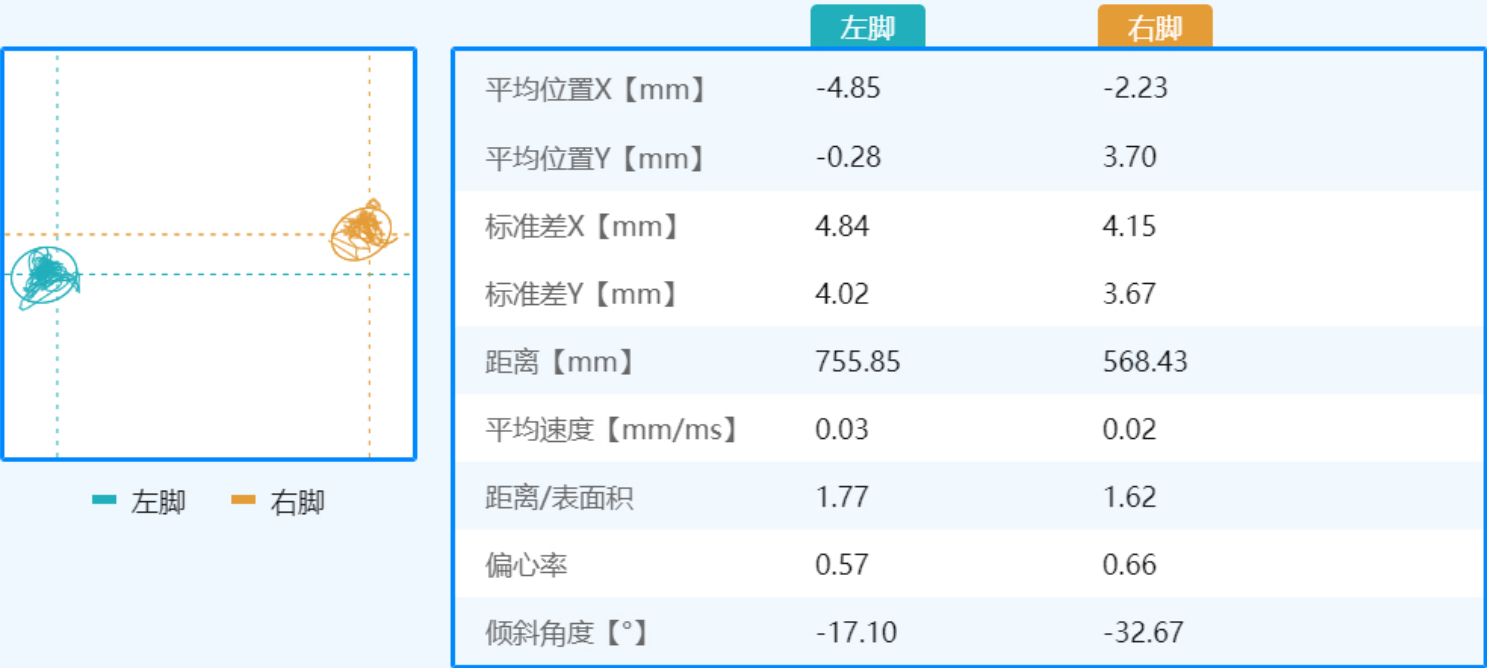

平衡报告

程永慧 19岁 女 77.0kg 165.0cm 2025-2-26 14:38:00



报告结论

睁眼  
左右晃动比前后晃动更明显

Supplement: Supplementary file 201 [file 平衡报告-程永慧-20250226143907.pdf › Plantar pressure and gait analysis/soccer/平衡报告-程永慧-20250226143907.pdf]



双脚重心变化

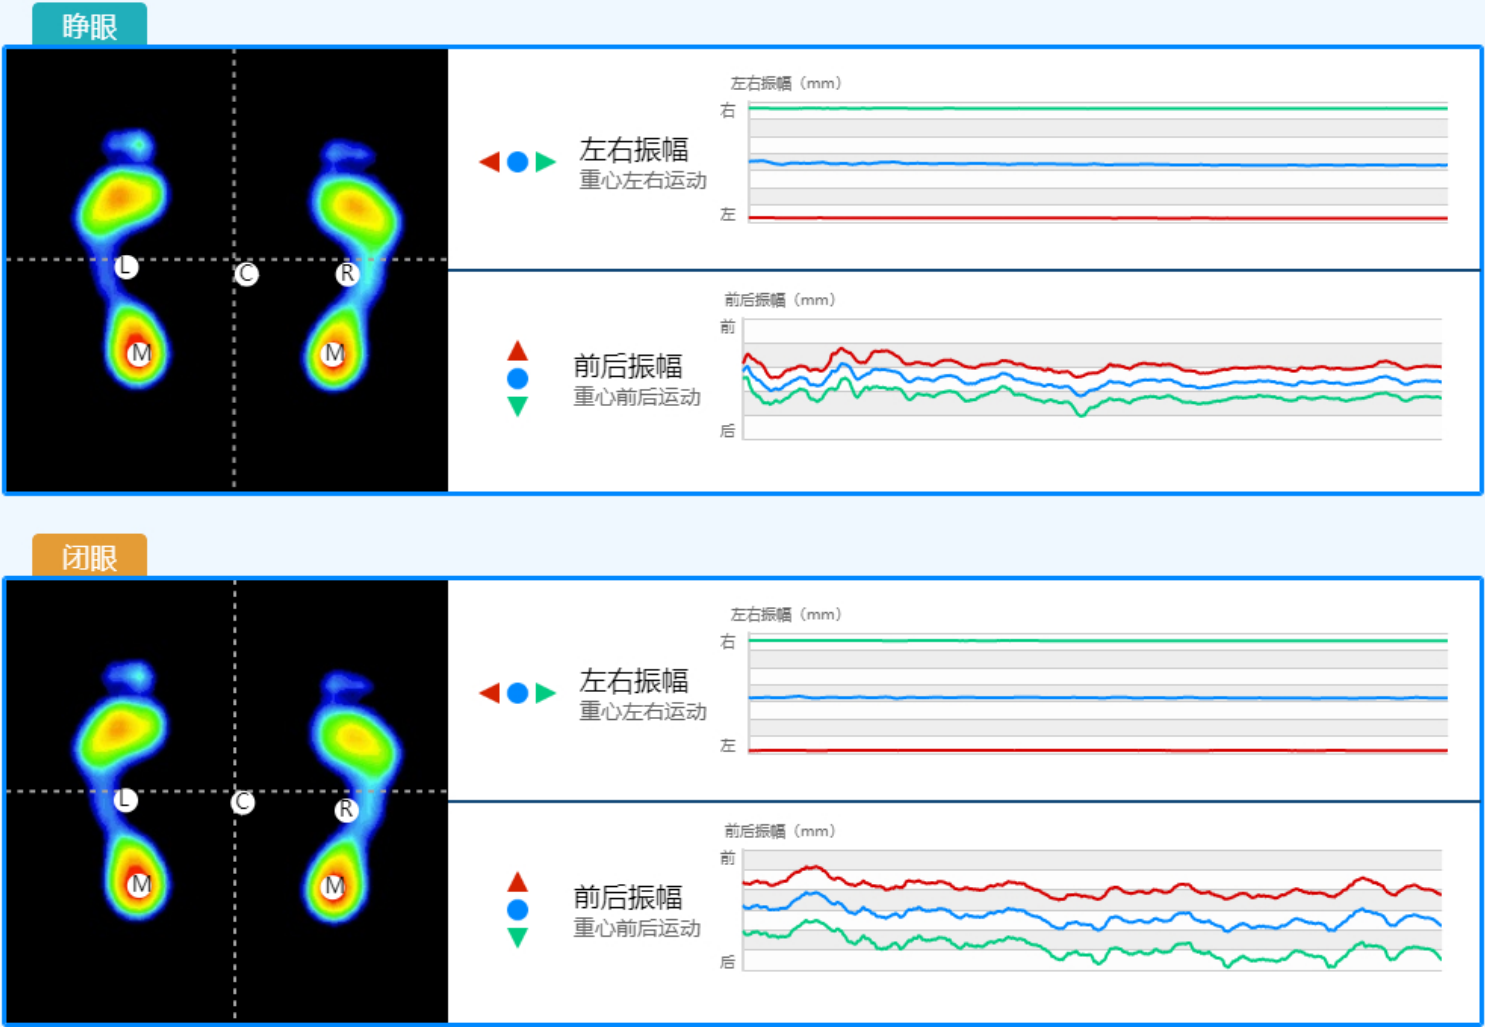

Cop数据

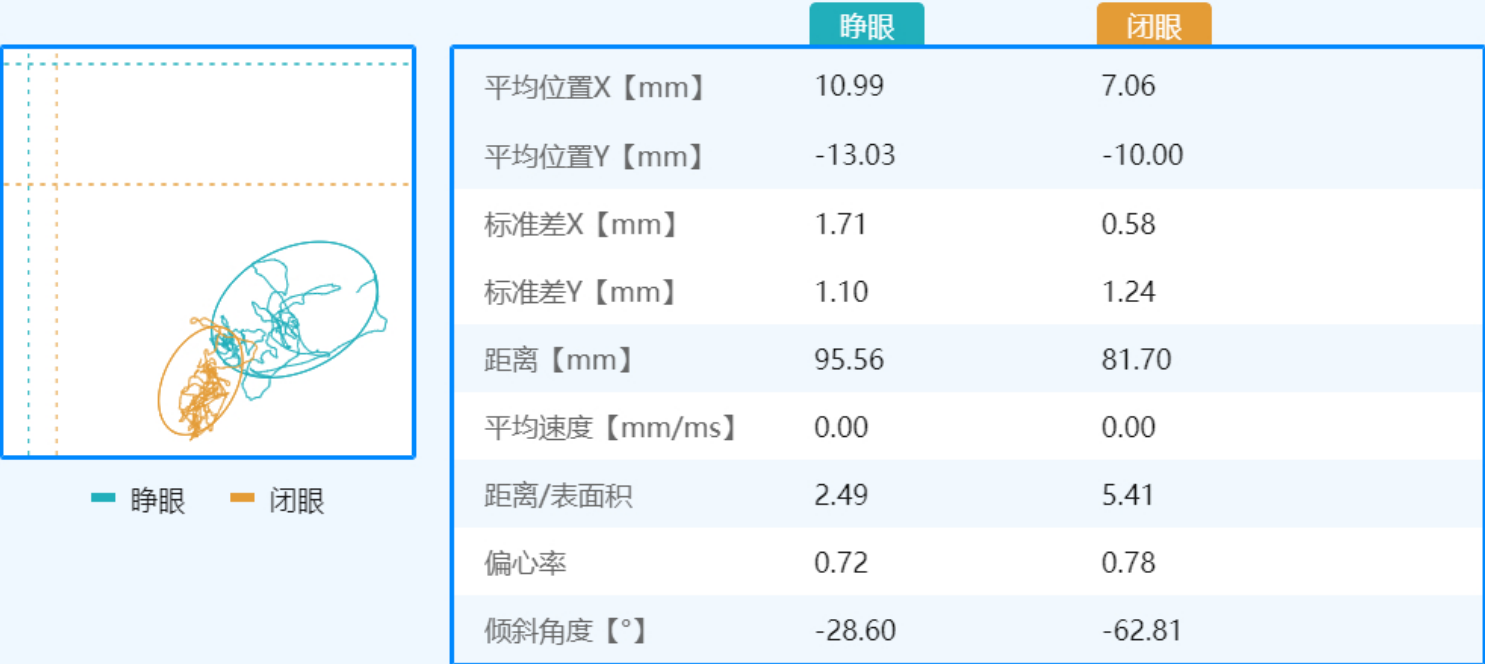

# 平衡报告

袁欣羽 19岁 女 50.0kg 162.0cm 2025-2-26 11:50:24



## 报告结论

睁眼  
身体重心位于右后方，骨盆右旋  
左右晃动比前后晃动更明显  
闭眼  
前后晃动比左右晃动更明显

Supplement: Supplementary file 205 [file 平衡报告-袁欣羽-20250226121527.pdf › Plantar pressure and gait analysis/soccer/平衡报告-袁欣羽-20250226121527.pdf]



双脚重心变化

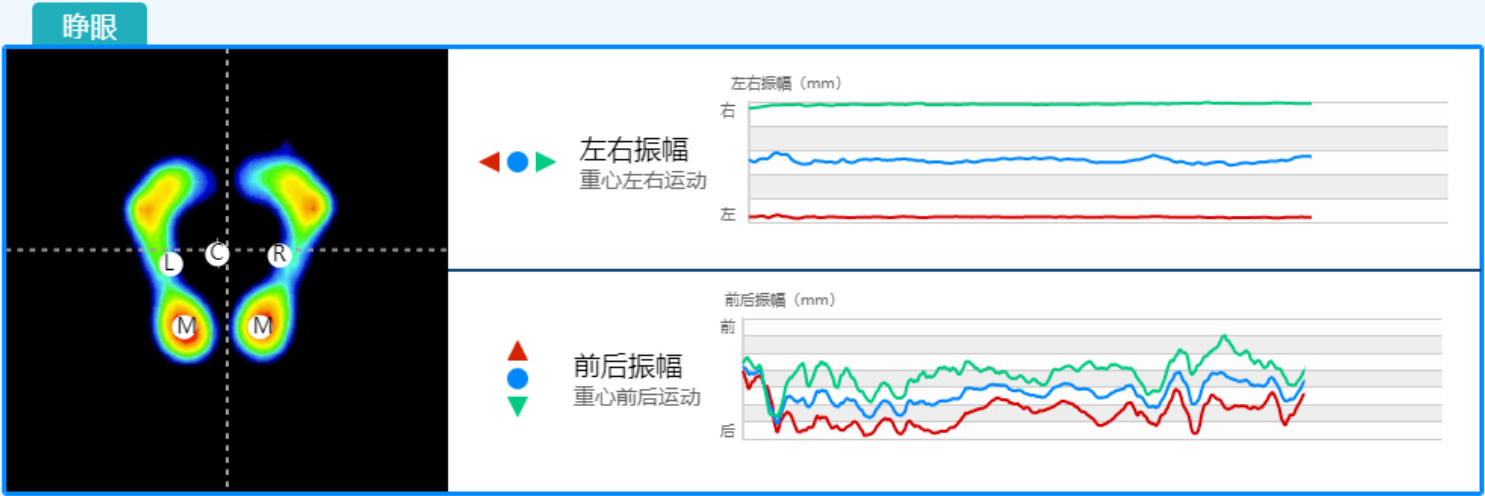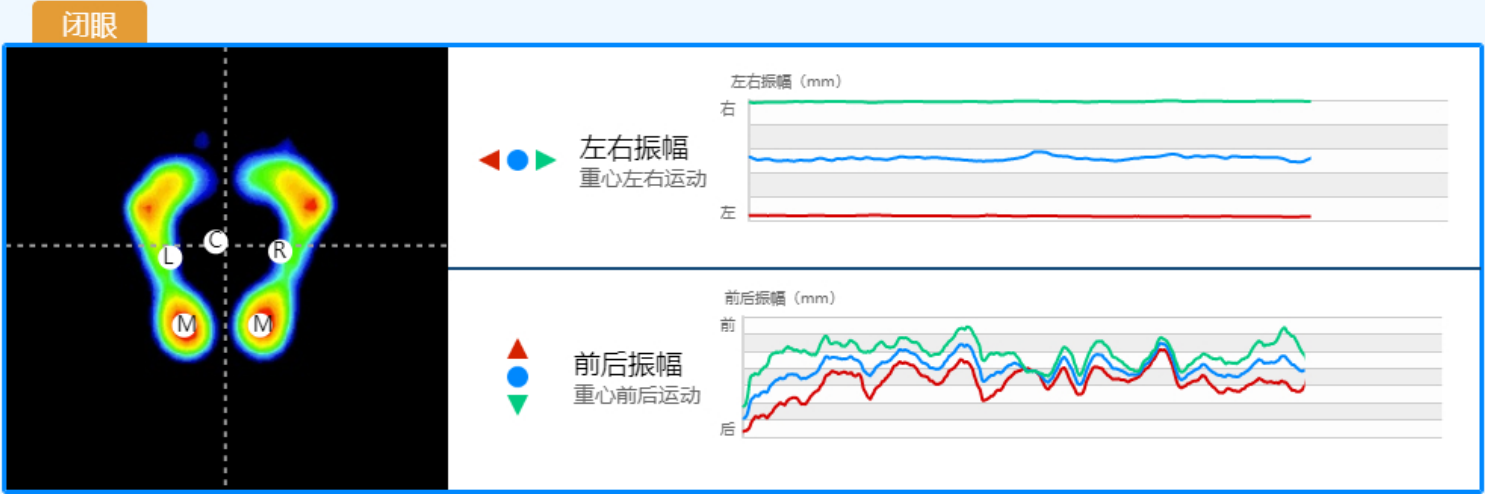

Cop数据

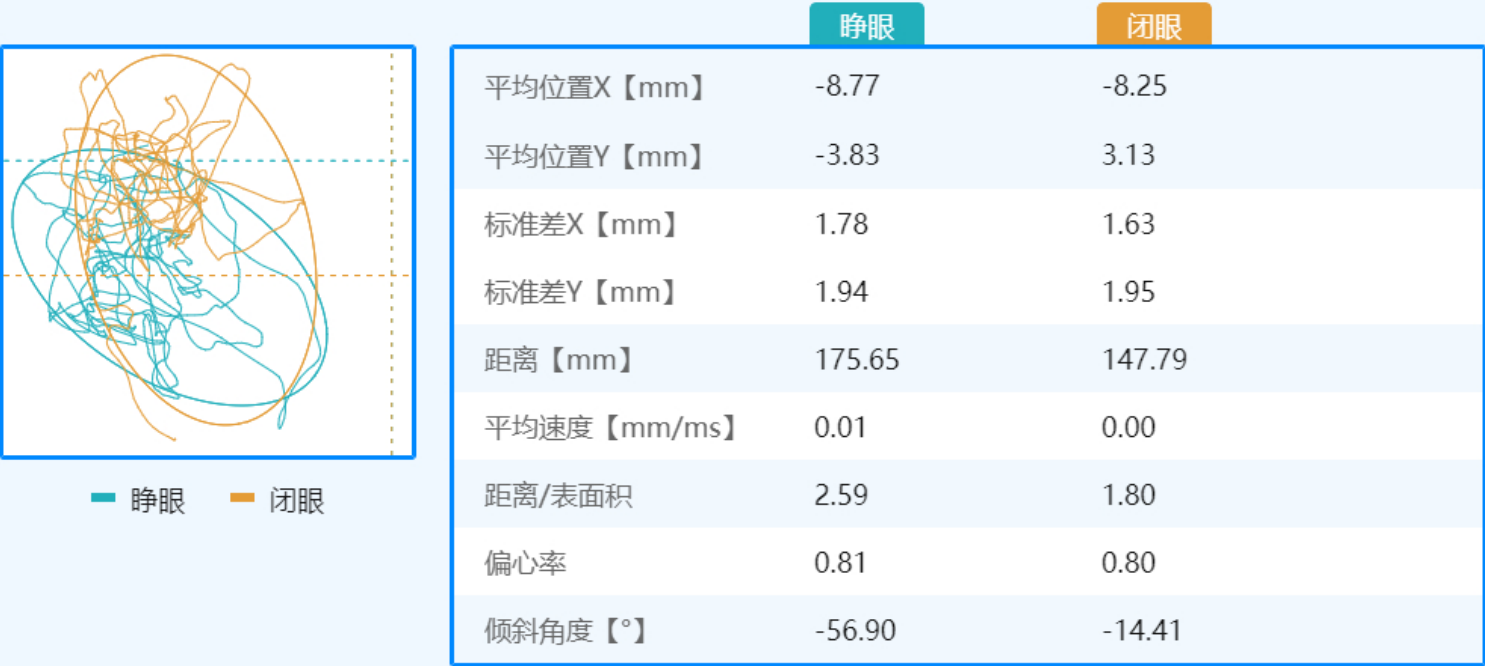

平衡报告

韩雨坪 20岁 女 50.0kg 158.0cm 2025-2-26 14:47:34



报告结论

睁眼  
前后晃动比左右晃动更明显  
闭眼  
前后晃动比左右晃动更明显

Supplement: Supplementary file 212 [file 平衡报告-韩雨坪-20250226144840.pdf › Plantar pressure and gait analysis/soccer/平衡报告-韩雨坪-20250226144840.pdf]



双脚重心变化

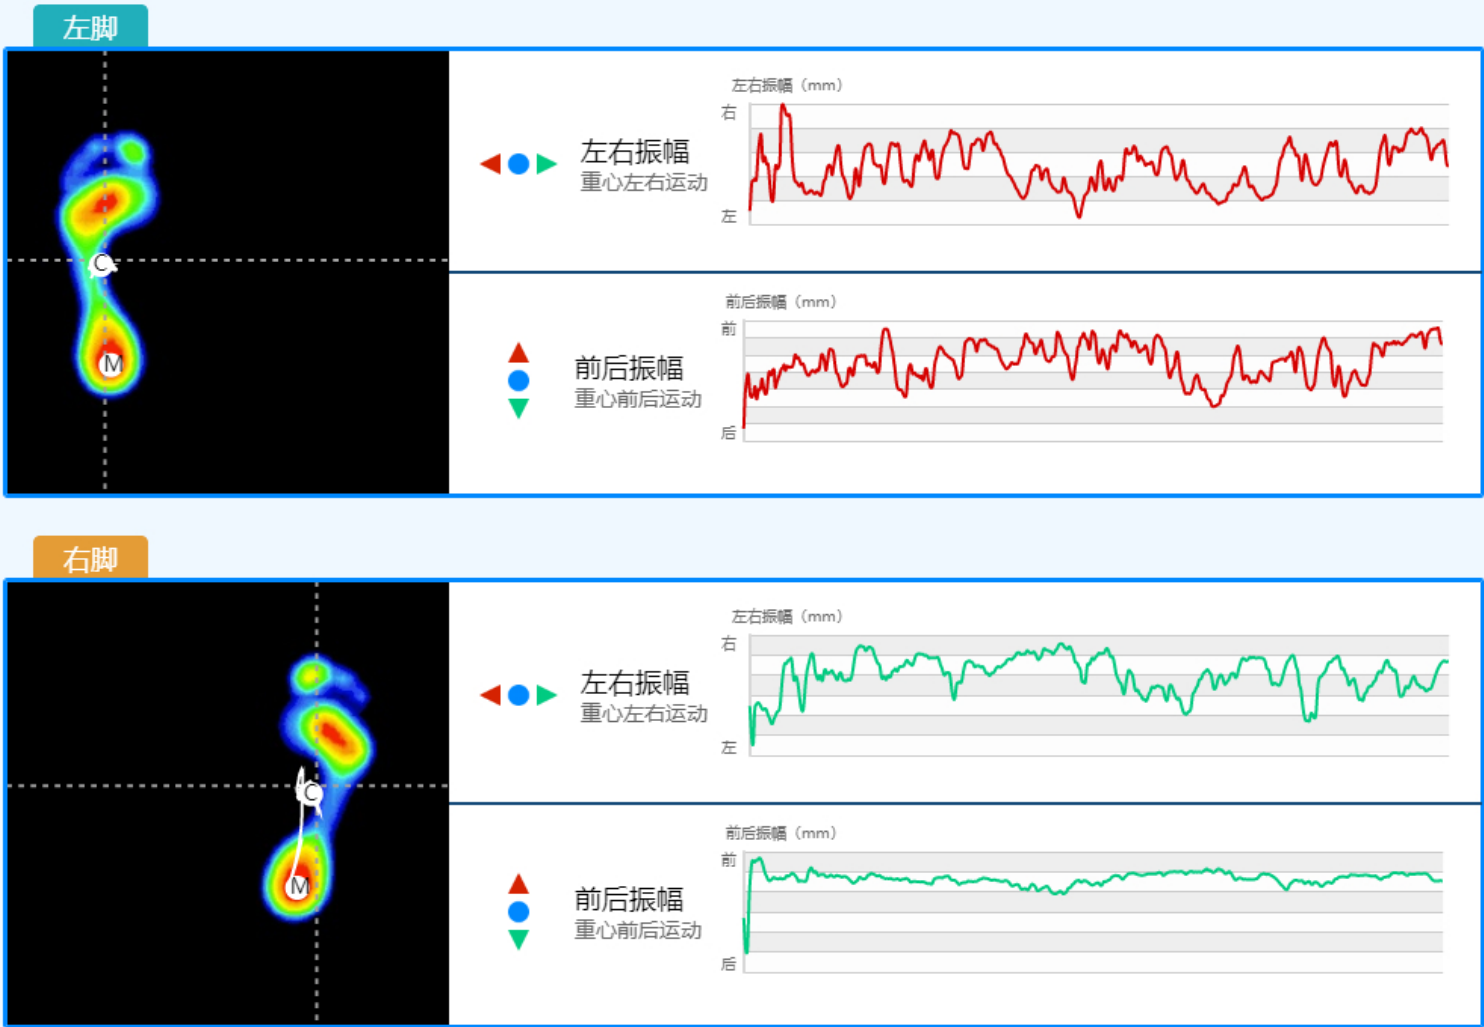

Cop数据

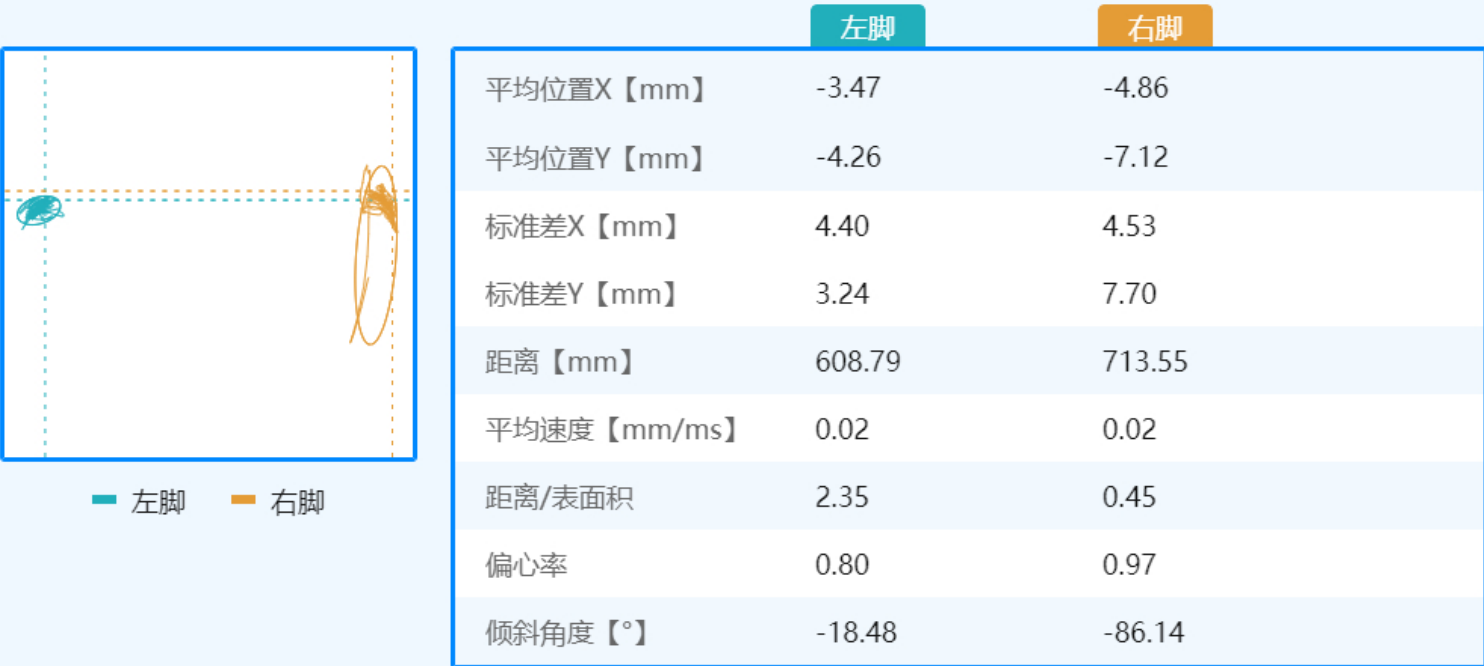

# 平衡报告

魏雨虹 21岁 女 53.0kg 168.0cm 2025-2-26 12:29:02



## 报告结论

睁眼  
前后振幅大于参考值  
前后晃动比左右晃动更明显

Supplement: Supplementary file 215 [file 平衡报告-魏雨虹-20250226123013.pdf › Plantar pressure and gait analysis/soccer/平衡报告-魏雨虹-20250226123013.pdf]



双脚重心变化

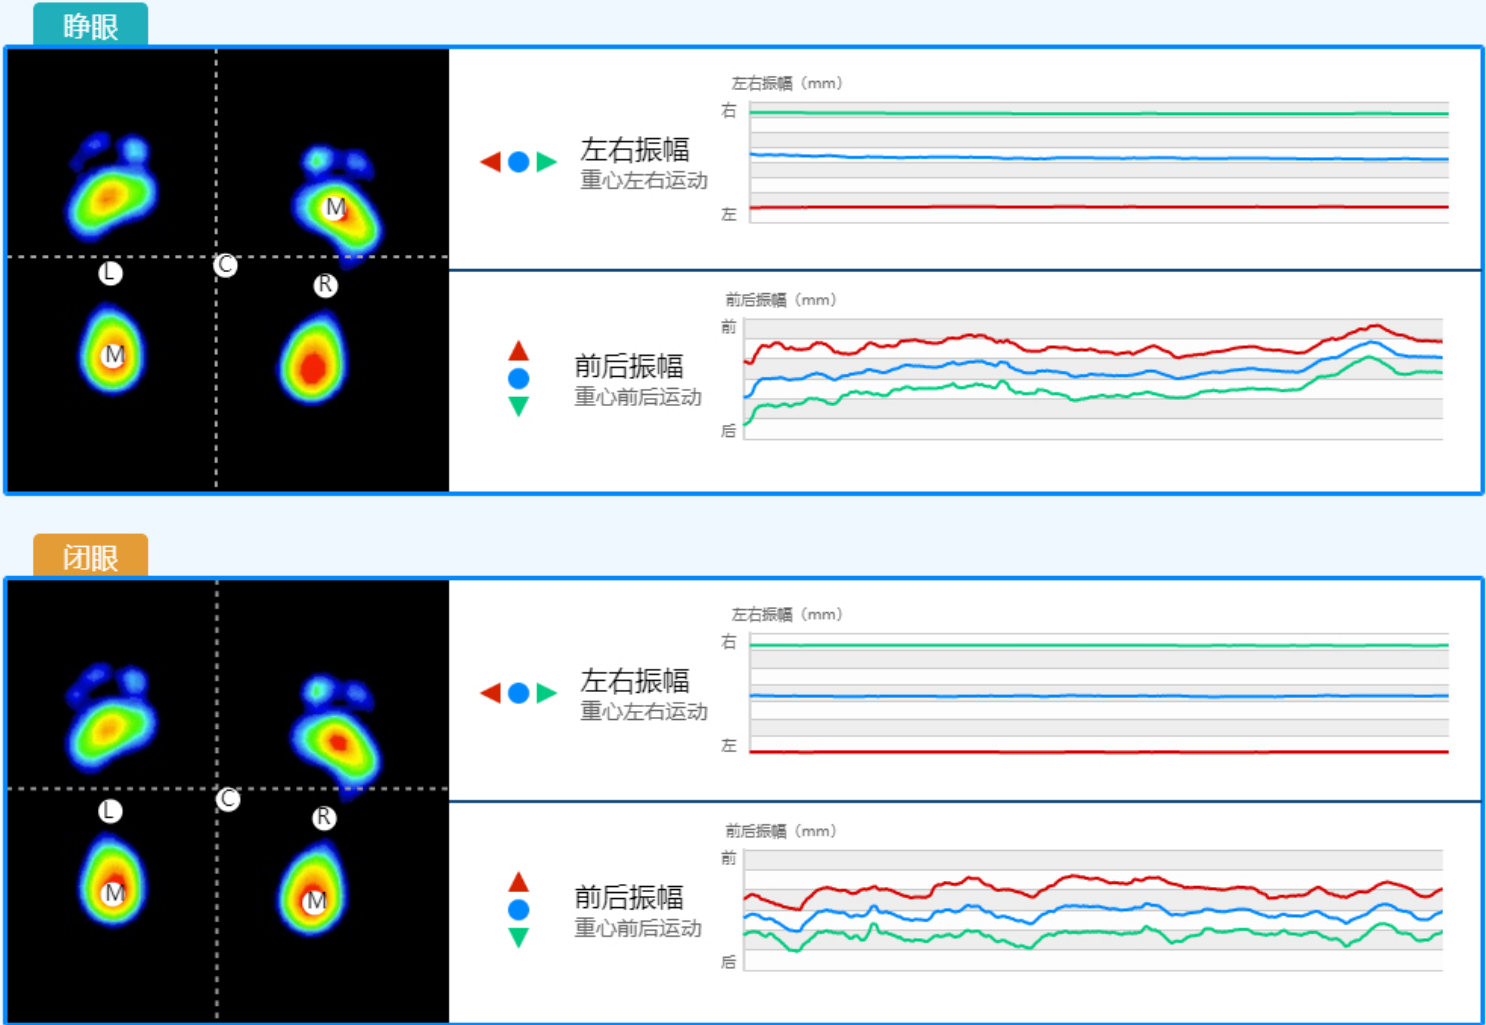

# 平衡报告

魏雨虹 21岁 女 53.0kg 168.0cm 2025-2-26 12:27:41



## 报告结论

睁眼  
前后晃动比左右晃动更明显  
闭眼  
前后晃动比左右晃动更明显

Supplement: Supplementary file 216 [file 平衡报告-魏雨虹-20250304093130.pdf › Plantar pressure and gait analysis/soccer/平衡报告-魏雨虹-20250304093130.pdf]



双脚重心变化

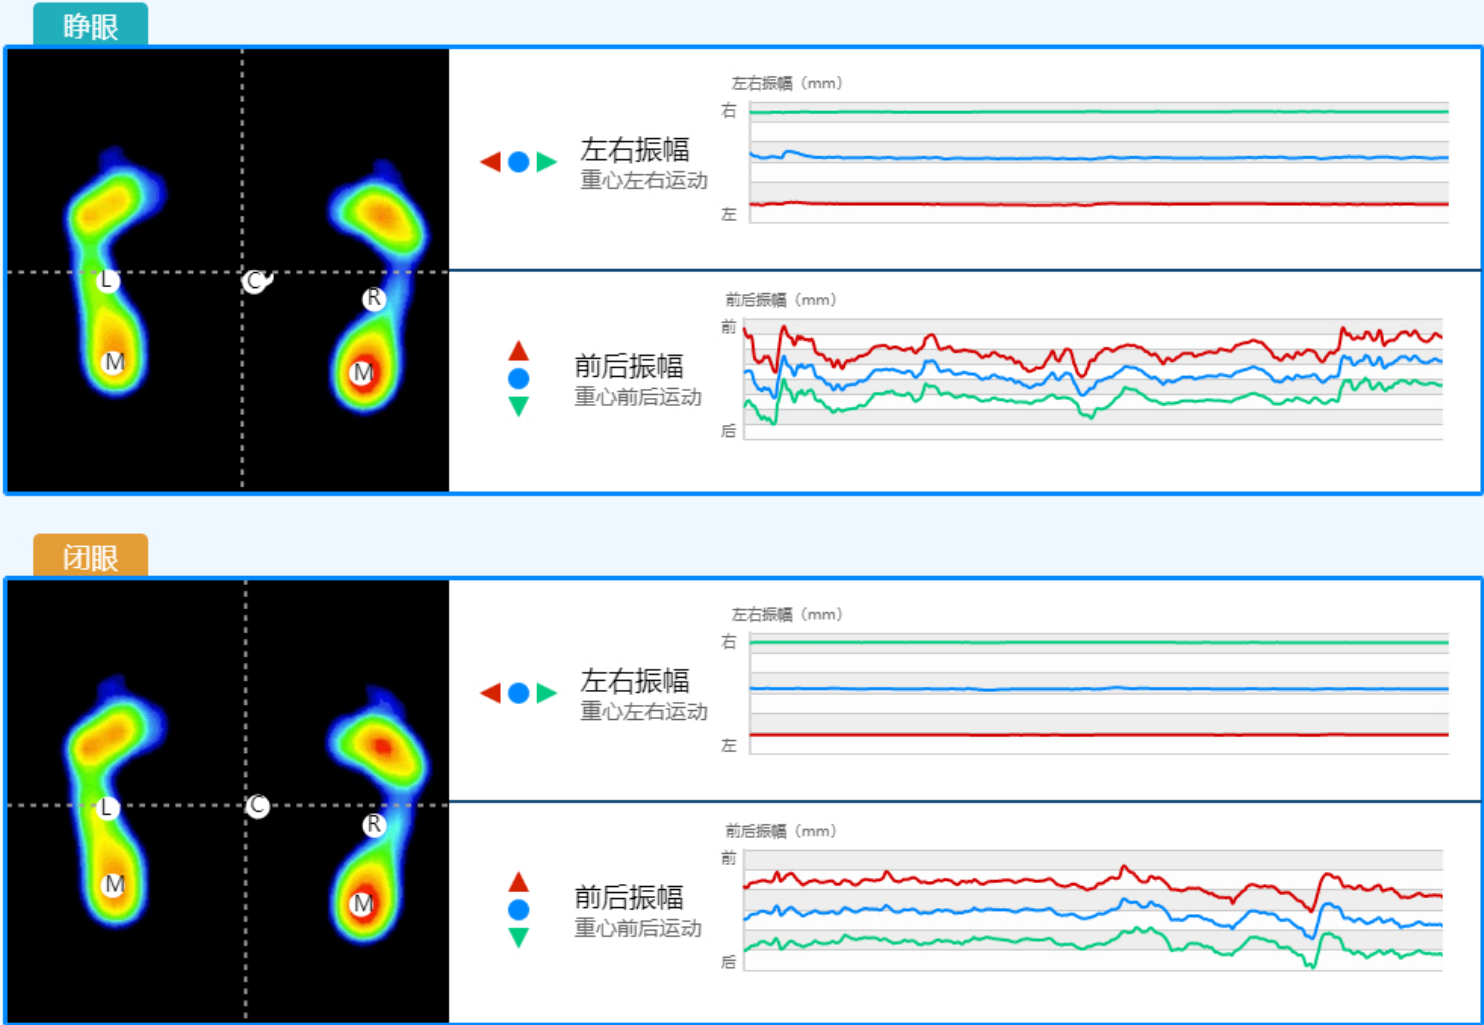

Cop数据

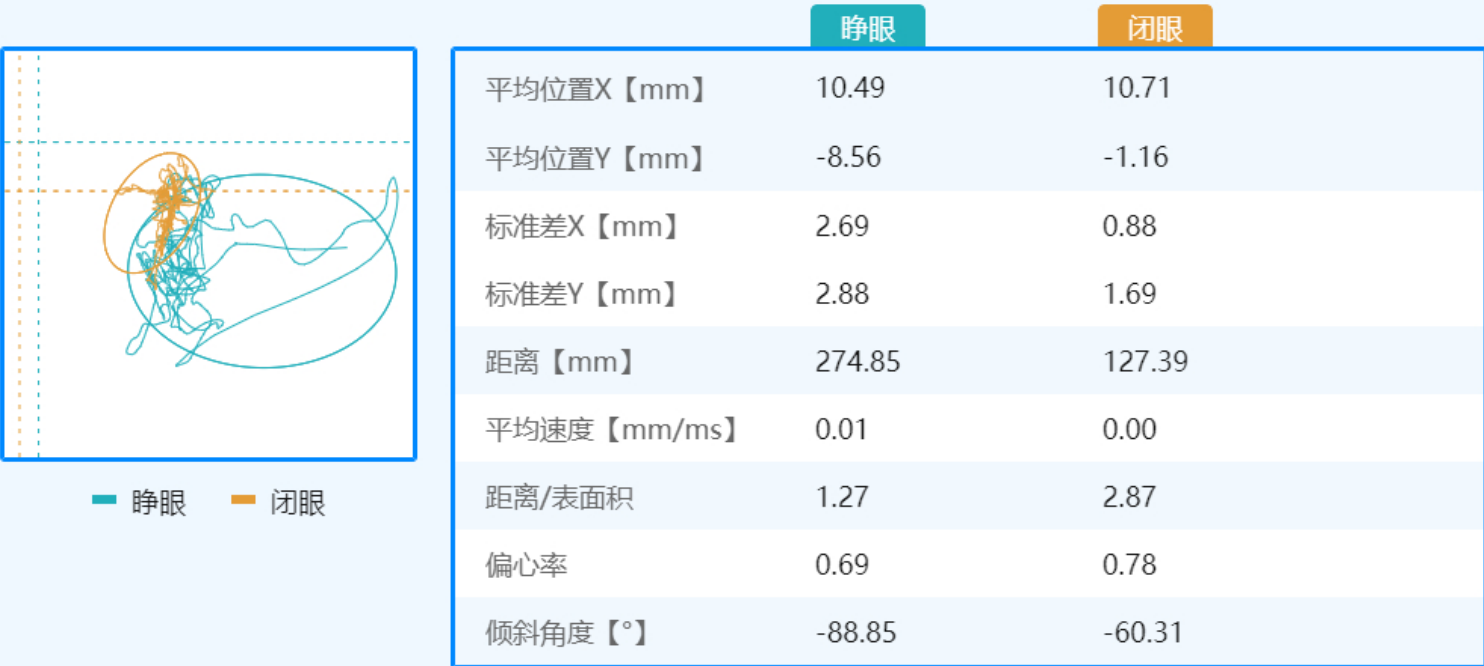

平衡报告

齐家树 20岁 男 65.0kg 172.0cm 2025-2-26 11:08:57



报告结论

睁眼  
前后晃动比左右晃动更明显  
闭眼  
前后晃动比左右晃动更明显

Supplement: Supplementary file 217 [file 平衡报告-齐家树-20250226111002.pdf › Plantar pressure and gait analysis/soccer/平衡报告-齐家树-20250226111002.pdf]



双脚重心变化

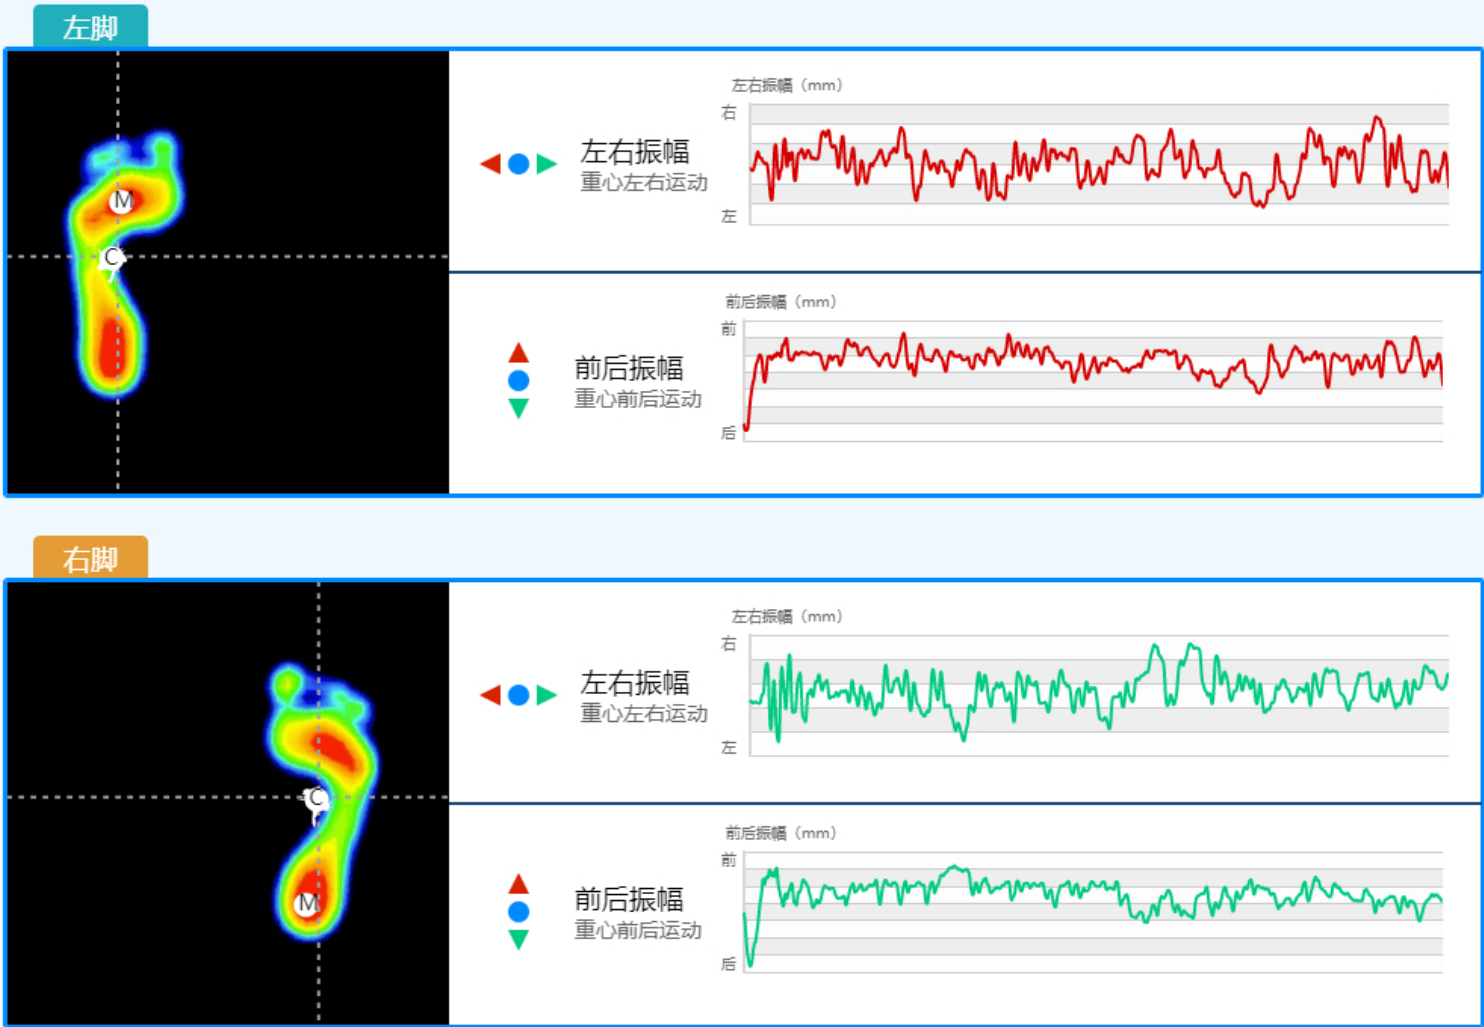

# 平衡报告

齐家树 20岁 男 65.0kg 172.0cm 2025-2-26 11:10:14



## 报告结论

睁眼  
前后晃动比左右晃动更明显

Supplement: Supplementary file 218 [file 平衡报告-齐家树-20250226111119.pdf › Plantar pressure and gait analysis/soccer/平衡报告-齐家树-20250226111119.pdf]

# 智能体能测评结果报告

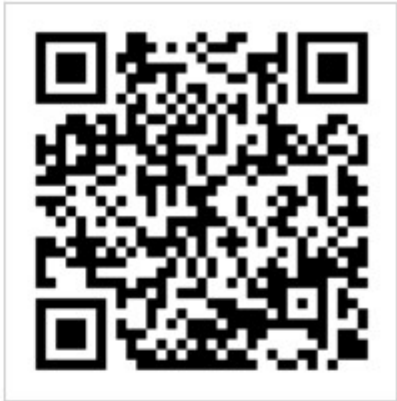

## 测试结果

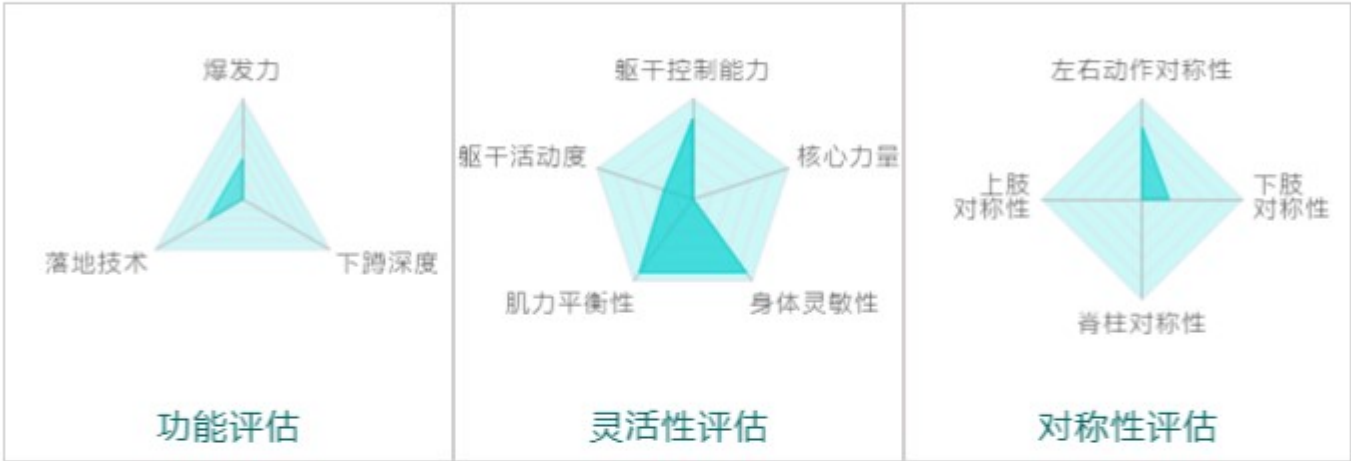

## 运动处方

| 动作名称          | 组数     | 次数   |
|---------------|--------|------|
| 臀部肌群拉伸训练_初级_1 | 每次3组   | 每周3次 |
| 臀部肌群拉伸训练_进阶_3 | 每次3-5组 | 每周3次 |
| 下肢前链拉伸训练_入门_2 | 每次3组   | 每周3次 |

Supplement: Supplementary file 251 [file 丁红丽.pdf › ntelligent motion capture system/丁红丽.pdf]

# 智能体能测评结果报告

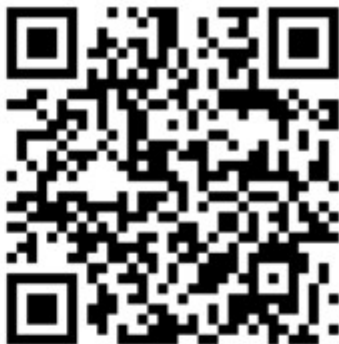

## 测试结果

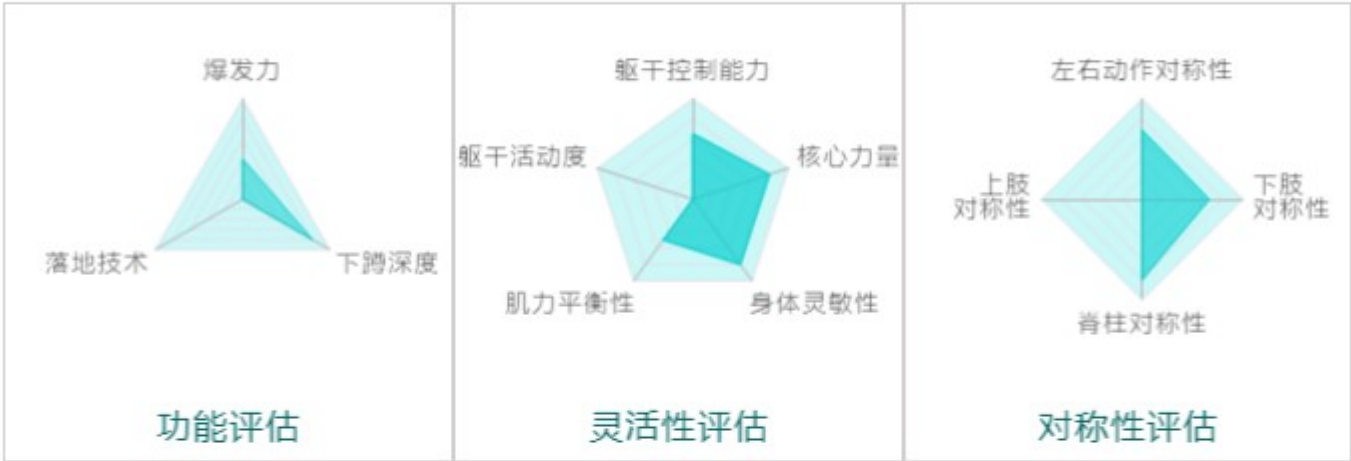

## 运动处方

| 动作名称          | 组数     | 次数   |
|---------------|--------|------|
| 臀部肌群拉伸训练_入门_1 | 每次3组   | 每周2次 |
| 臀部肌群拉伸训练_进阶_1 | 每次3-5组 | 每周3次 |
| 臀部肌群拉伸训练_进阶_4 | 每次3-5组 | 每周3次 |

Supplement: Supplementary file 252 [file 何依雯.pdf › ntelligent motion capture system/何依雯.pdf]

# 智能体能测评结果报告

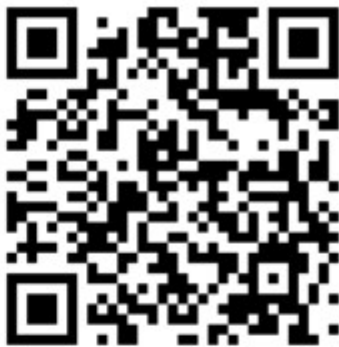

## 测试结果

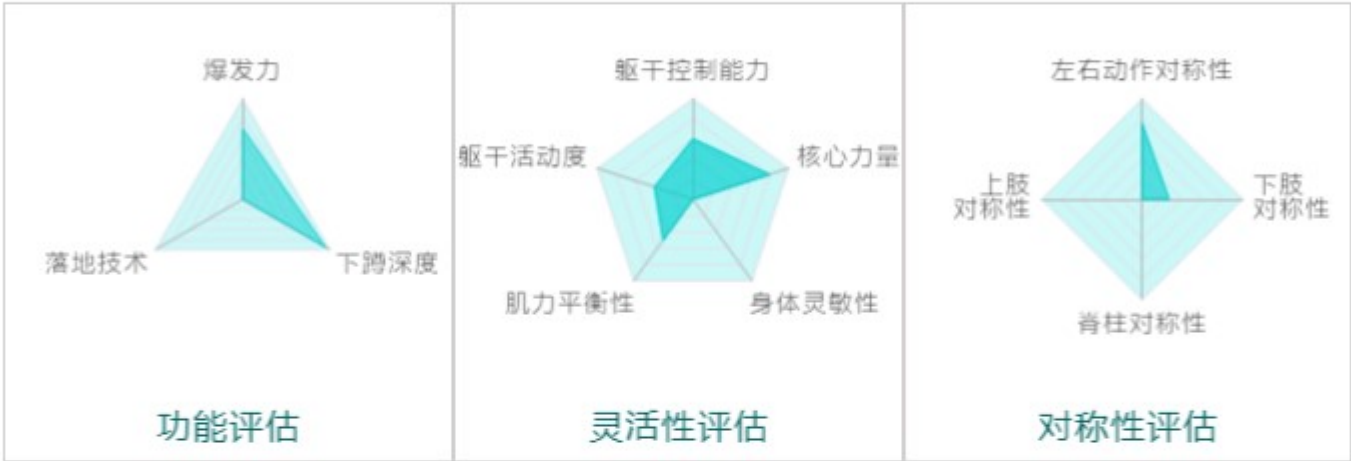

## 运动处方

| 动作名称            | 组数     | 次数   |
|-----------------|--------|------|
| 下肢前链拉伸训练_高级_3   | 每次3-5组 | 每周2次 |
| 大腿后侧肌群拉伸训练_入门_1 | 每次3组   | 每周2次 |
| 臀部肌群拉伸训练_初级_3   | 每次3-5组 | 每周3次 |

Supplement: Supplementary file 253 [file 何长强.pdf › ntelligent motion capture system/何长强.pdf]

# 智能体能测评结果报告

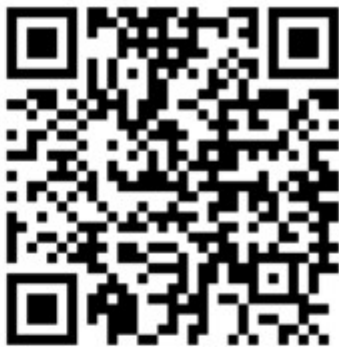

## 测试结果

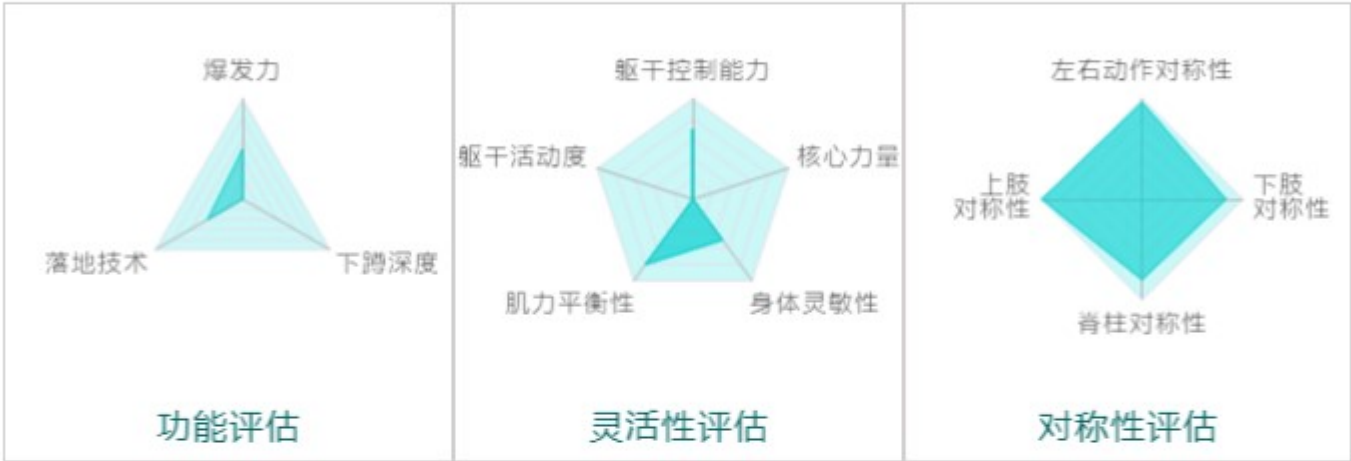

## 运动处方

| 动作名称          | 组数   | 次数   |
|---------------|------|------|
| 臀部肌群拉伸训练_初级_2 | 每次3组 | 每周3次 |
| 臀部肌群拉伸训练_进阶_2 | 每次3组 | 每周3次 |
| 臀部肌群拉伸训练_初级_1 | 每次3组 | 每周3次 |

Supplement: Supplementary file 254 [file 侯文琪.pdf › ntelligent motion capture system/侯文琪.pdf]

# 智能体能测评结果报告

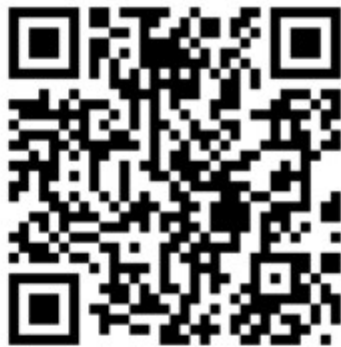

## 测试结果

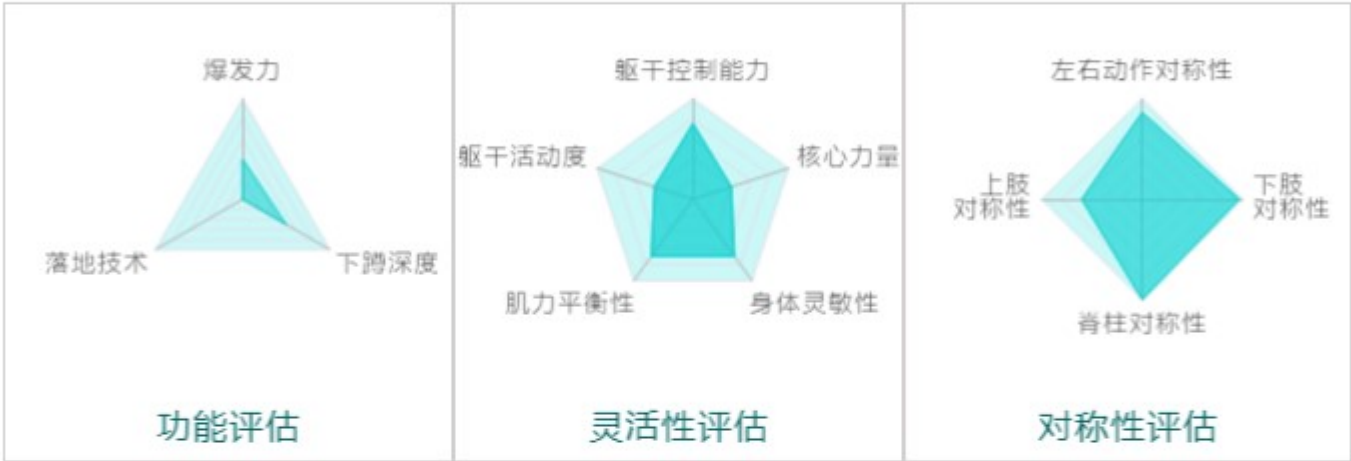

## 运动处方

| 动作名称            | 组数     | 次数          |
|-----------------|--------|-------------|
| 大腿外侧链拉伸_初级_1    | 每次2-3组 | 训练计划：每周1-2次 |
| 大腿后侧肌群拉伸训练_入门_1 | 每次3组   | 每周2次        |
| 臀部肌群拉伸训练_进阶_3   | 每次3-5组 | 每周3次        |

Supplement: Supplementary file 255 [file 冯佳琳.pdf › ntelligent motion capture system/冯佳琳.pdf]

# 智能体能测评结果报告

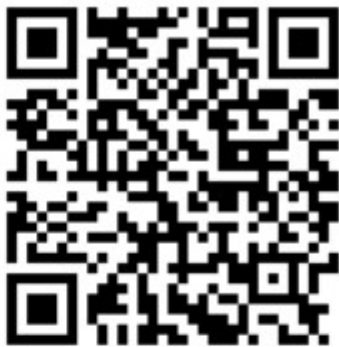

## 测试结果

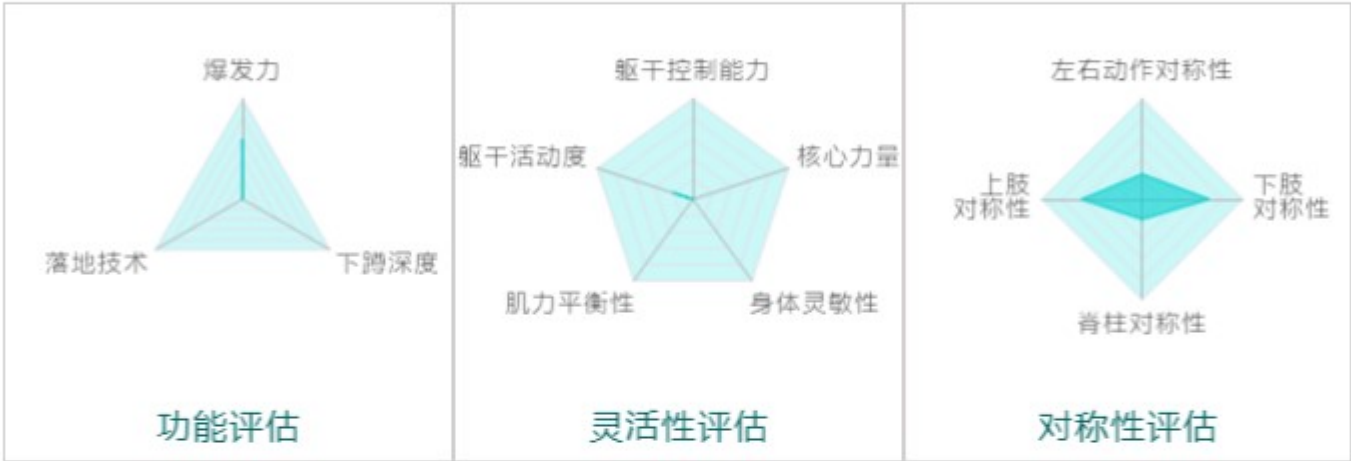

## 运动处方

| 动作名称          | 组数     | 次数   |
|---------------|--------|------|
| 臀部肌群拉伸训练_初级_1 | 每次3组   | 每周3次 |
| 下肢前链拉伸训练_进阶_2 | 每次3-5组 | 每周3次 |
| 腹部拉伸训练_进阶_1   | 每次2组   | 每周3次 |

Supplement: Supplementary file 256 [file 冯晨一.pdf › ntelligent motion capture system/冯晨一.pdf]

# 智能体能测评结果报告

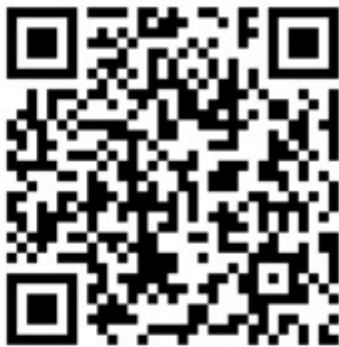

## 测试结果

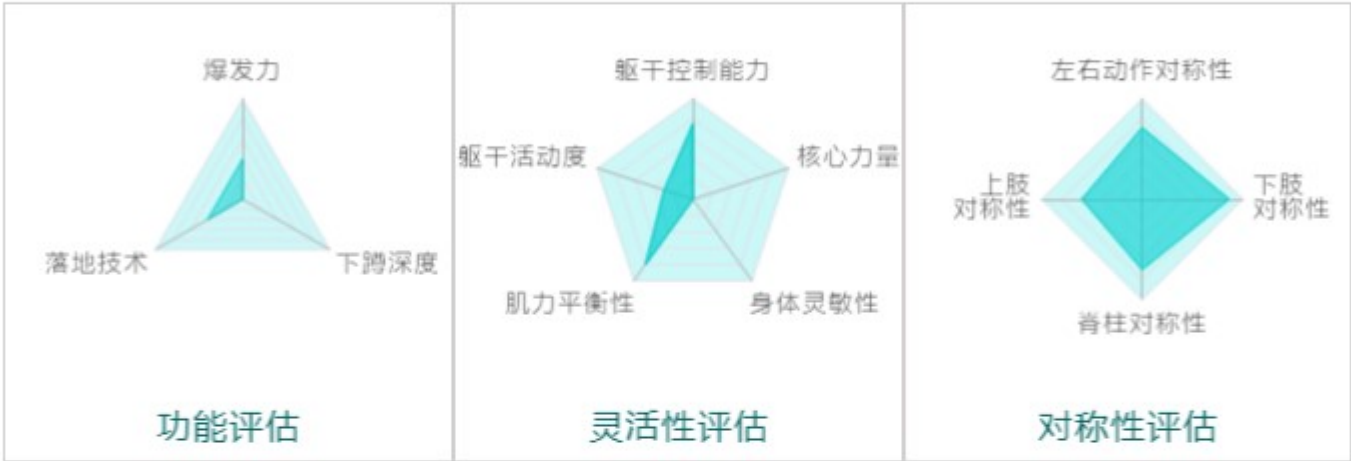

## 运动处方

| 动作名称          | 组数     | 次数   |
|---------------|--------|------|
| 臀部肌群拉伸训练_进阶_3 | 每次3-5组 | 每周3次 |
| 臀部肌群拉伸训练_初级_1 | 每次3组   | 每周3次 |
| 下肢前链拉伸训练_高级_3 | 每次3-5组 | 每周2次 |

Supplement: Supplementary file 257 [file 周敏.pdf › ntelligent motion capture system/周敏.pdf]

# 智能体能测评结果报告

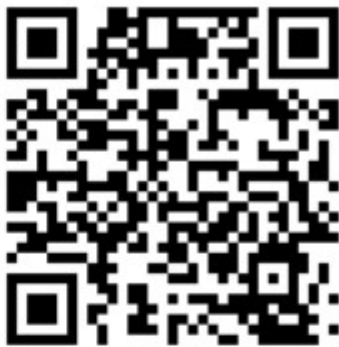

## 测试结果

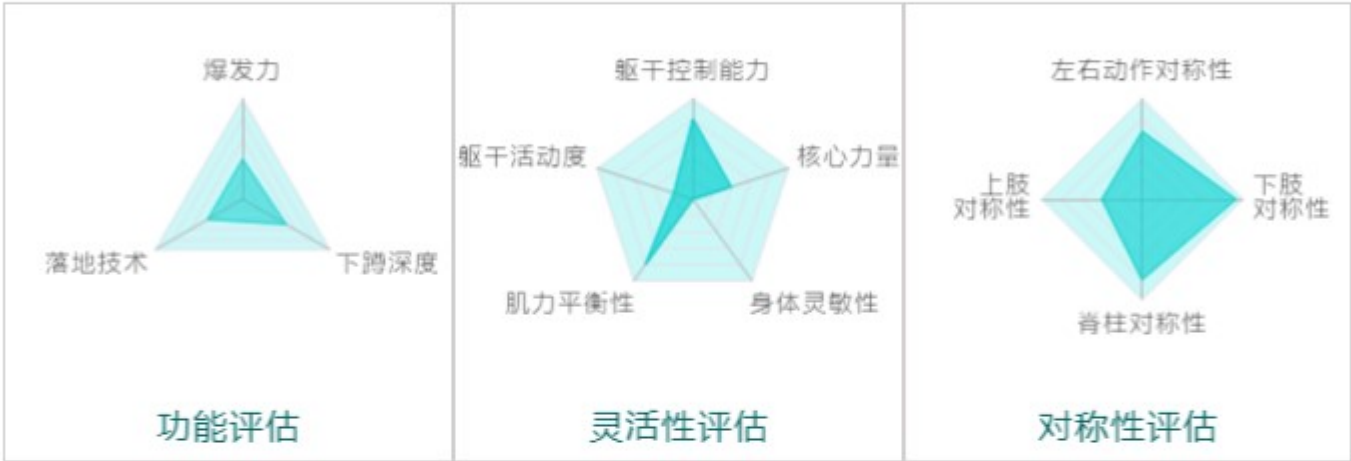

## 运动处方

| 动作名称          | 组数     | 次数   |
|---------------|--------|------|
| 臀部肌群拉伸训练_初级_2 | 每次3组   | 每周3次 |
| 臀部肌群拉伸训练_进阶_3 | 每次3-5组 | 每周3次 |
| 腹部拉伸训练_进阶_1   | 每次2组   | 每周3次 |

Supplement: Supplementary file 258 [file 孙微珊.pdf › ntelligent motion capture system/孙微珊.pdf]

# 智能体能测评结果报告

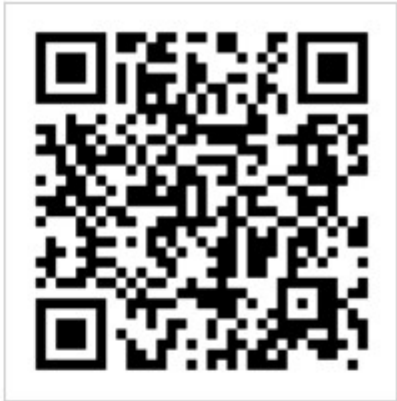

## 测试结果

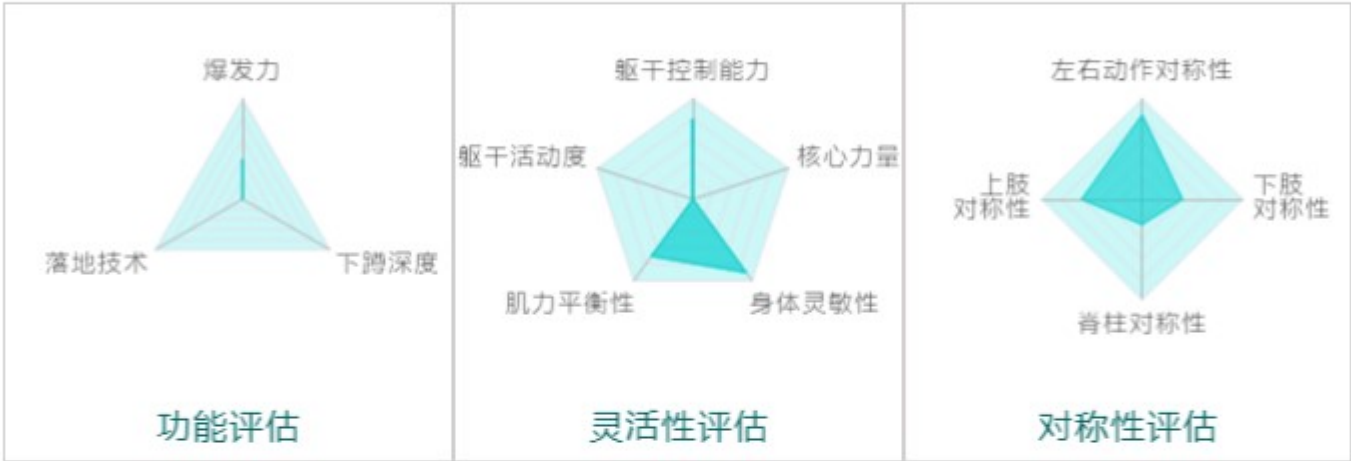

## 运动处方

| 动作名称          | 组数     | 次数   |
|---------------|--------|------|
| 臀部肌群拉伸训练_进阶_3 | 每次3-5组 | 每周3次 |
| 臀部肌群拉伸训练_初级_1 | 每次3组   | 每周3次 |
| 下肢前链拉伸训练_入门_3 | 每次3-5组 | 每周3次 |

Supplement: Supplementary file 259 [file 孙悦.pdf › ntelligent motion capture system/孙悦.pdf]

# 智能体能测评结果报告

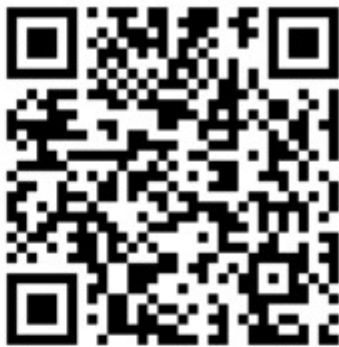

## 测试结果

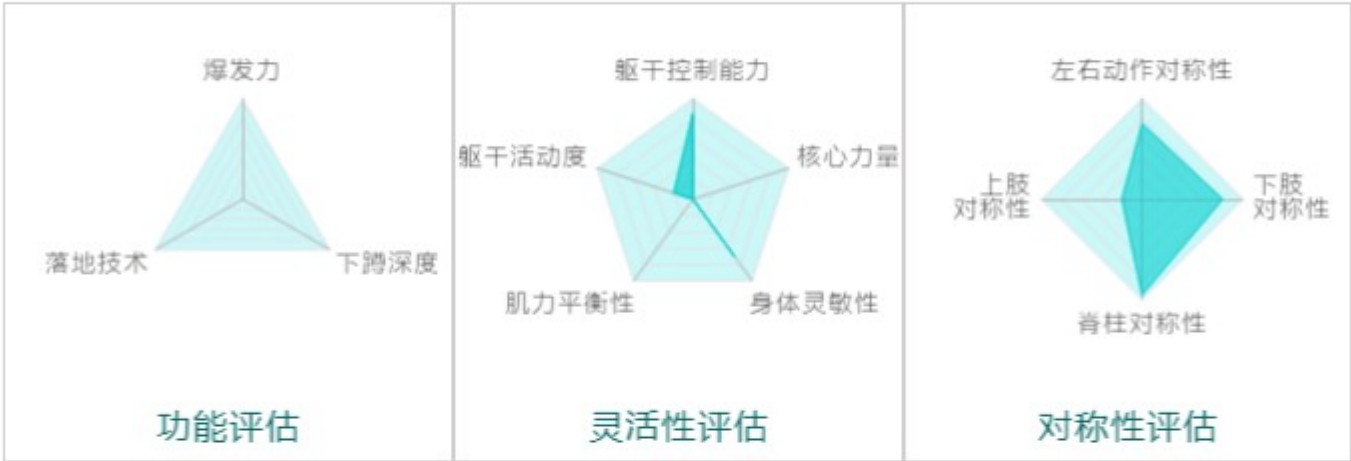

## 运动处方

| 动作名称          | 组数     | 次数   |
|---------------|--------|------|
| 臀部肌群拉伸训练_进阶_4 | 每次3-5组 | 每周3次 |
| 臀部肌群拉伸训练_初级_1 | 每次3组   | 每周3次 |
| 下肢前链拉伸训练_高级_3 | 每次3-5组 | 每周2次 |

Supplement: Supplementary file 260 [file 宋璐杰.pdf › ntelligent motion capture system/宋璐杰.pdf]

# 智能体能测评结果报告

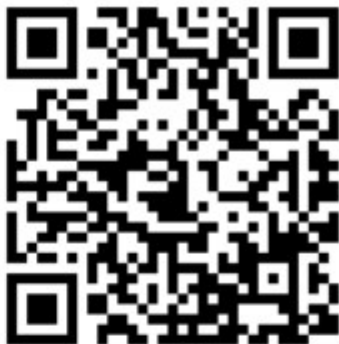

## 测试结果

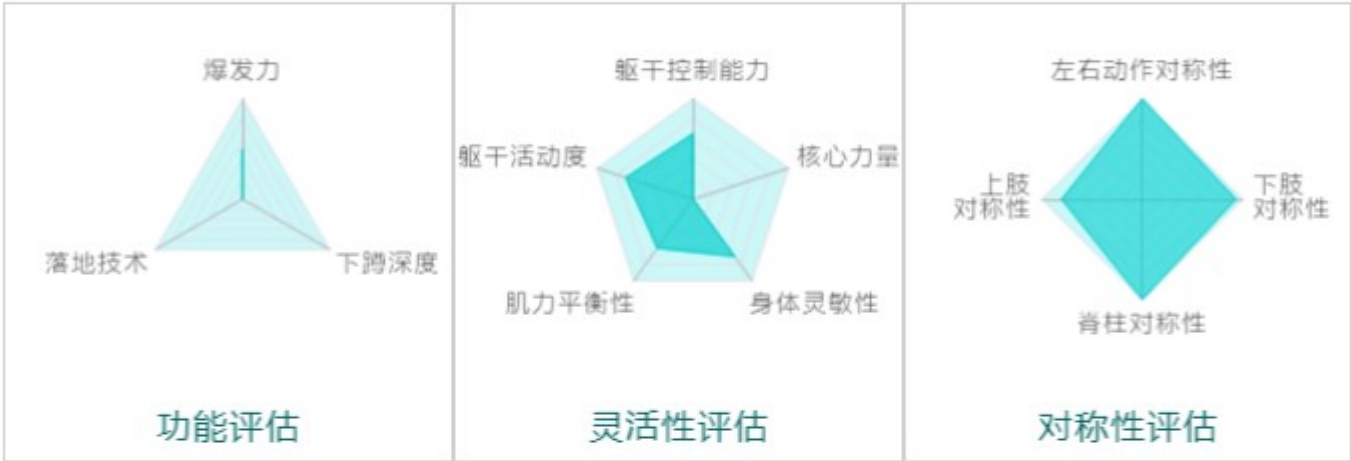

## 运动处方

| 动作名称          | 组数     | 次数   |
|---------------|--------|------|
| 臀部肌群拉伸训练_进阶_1 | 每次3-5组 | 每周3次 |
| 臀部肌群拉伸训练_初级_1 | 每次3组   | 每周3次 |
| 下肢前链拉伸训练_高级_3 | 每次3-5组 | 每周2次 |

Supplement: Supplementary file 261 [file 席耘赫.pdf › ntelligent motion capture system/席耘赫.pdf]

# 智能体能测评结果报告

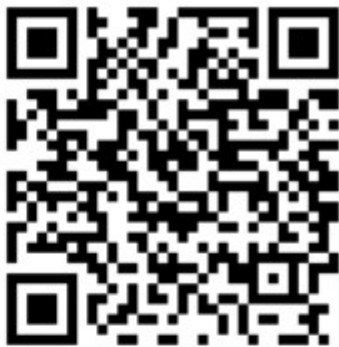

## 测试结果

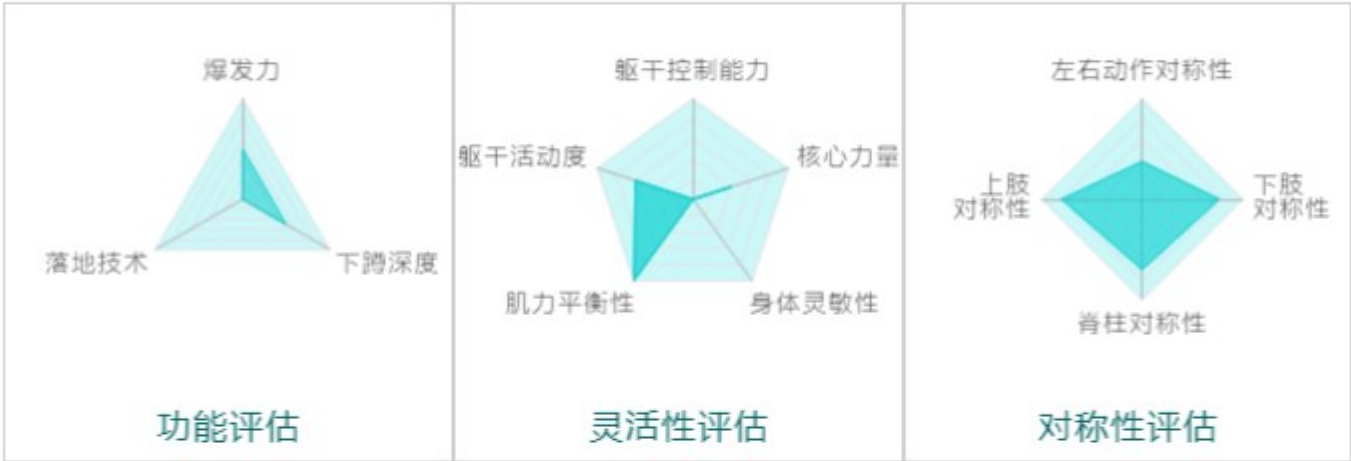

## 运动处方

| 动作名称            | 组数     | 次数     |
|-----------------|--------|--------|
| 臀部肌群拉伸训练_初级_2   | 每次3组   | 每周3次   |
| 大腿后侧肌群拉伸训练_初级_3 | 每次3-5组 | 每周3次   |
| 大腿外侧链拉伸_入门_1    | 每次2-3组 | 每周1-2次 |

Supplement: Supplementary file 262 [file 张东琪.pdf › ntelligent motion capture system/张东琪.pdf]

# 智能体能测评结果报告

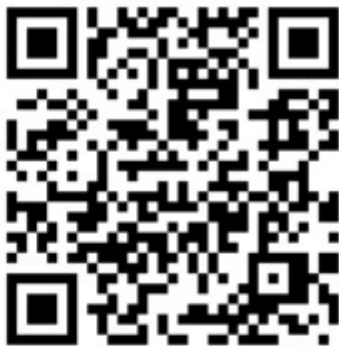

## 测试结果

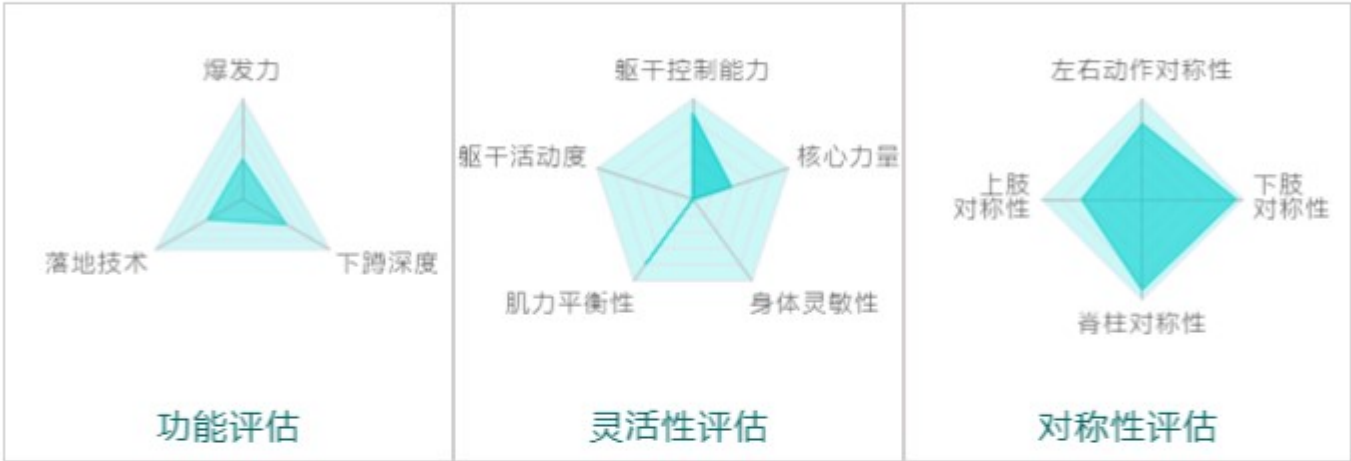

## 运动处方

| 动作名称          | 组数     | 次数   |
|---------------|--------|------|
| 臀部肌群拉伸训练_初级_2 | 每次3组   | 每周3次 |
| 臀部肌群拉伸训练_进阶_4 | 每次3-5组 | 每周3次 |
| 小腿后群拉伸训练_初级_1 | 每次2-3组 | 每周3次 |

Supplement: Supplementary file 263 [file 张佳涵.pdf › ntelligent motion capture system/张佳涵.pdf]

# 智能体能测评结果报告

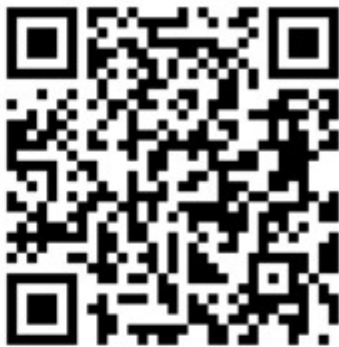

## 测试结果

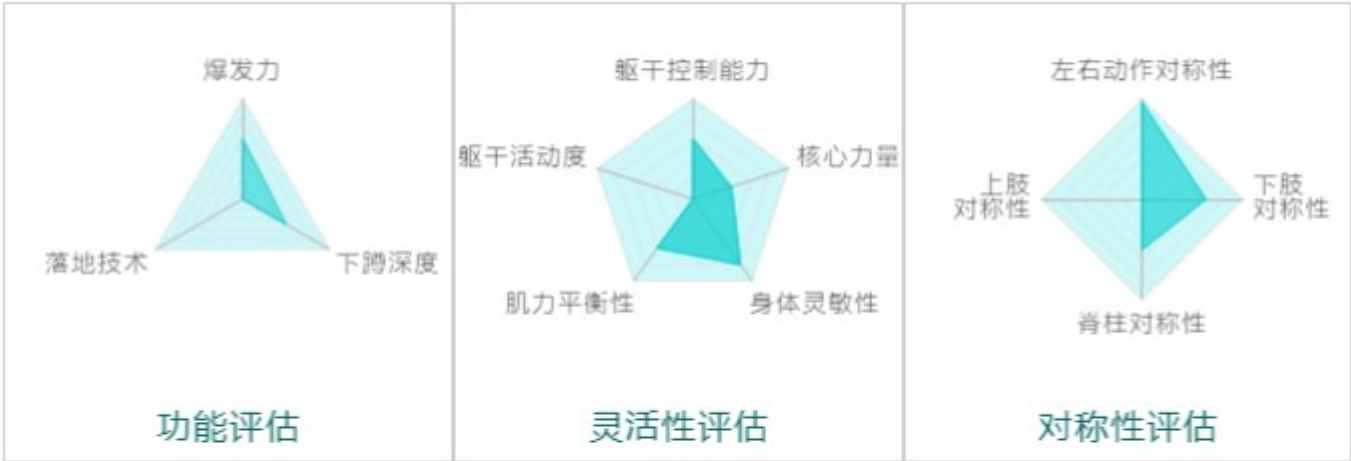

## 运动处方

| 动作名称            | 组数     | 次数          |
|-----------------|--------|-------------|
| 大腿外侧链拉伸_初级_1    | 每次2-3组 | 训练计划：每周1-2次 |
| 大腿后侧肌群拉伸训练_入门_1 | 每次3组   | 每周2次        |
| 臀部肌群拉伸训练_初级_3   | 每次3-5组 | 每周3次        |

Supplement: Supplementary file 264 [file 张凌志.pdf › ntelligent motion capture system/张凌志.pdf]

# 智能体能测评结果报告

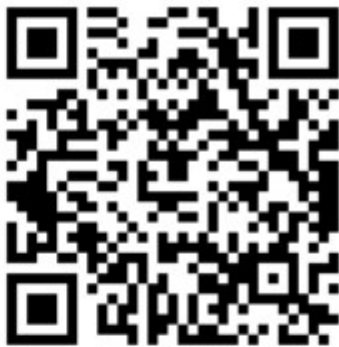

## 测试结果

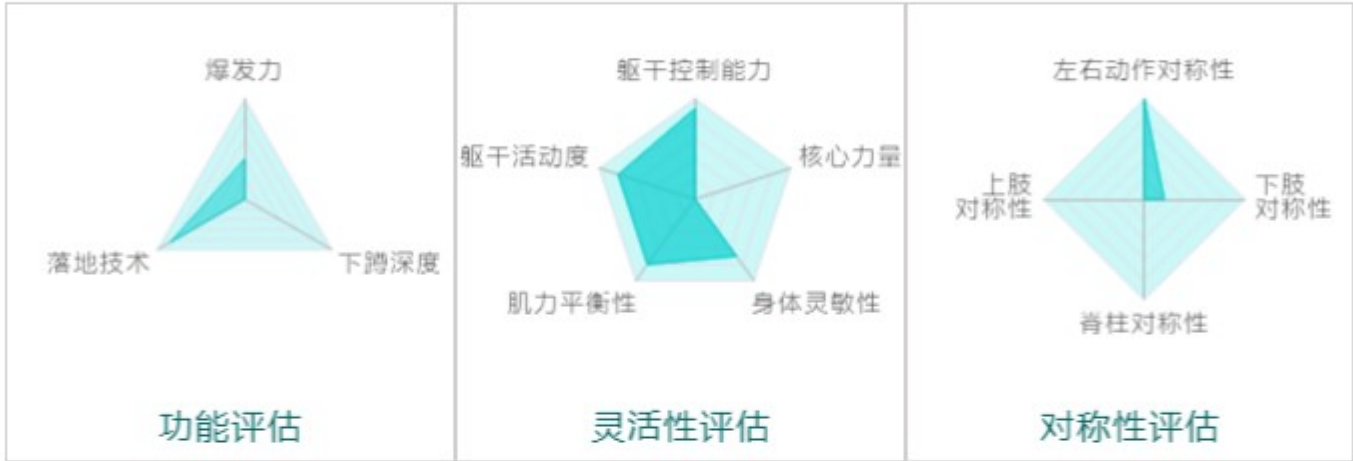

## 运动处方

| 动作名称          | 组数   | 次数   |
|---------------|------|------|
| 臀部肌群拉伸训练_初级_2 | 每次3组 | 每周3次 |
| 臀部肌群拉伸训练_初级_1 | 每次3组 | 每周3次 |
| 下肢前链拉伸训练_初级_1 | 每次3组 | 每周3次 |

Supplement: Supplementary file 265 [file 张可云.pdf › ntelligent motion capture system/张可云.pdf]

# 智能体能测评结果报告

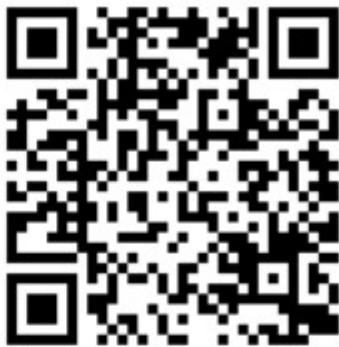

## 测试结果

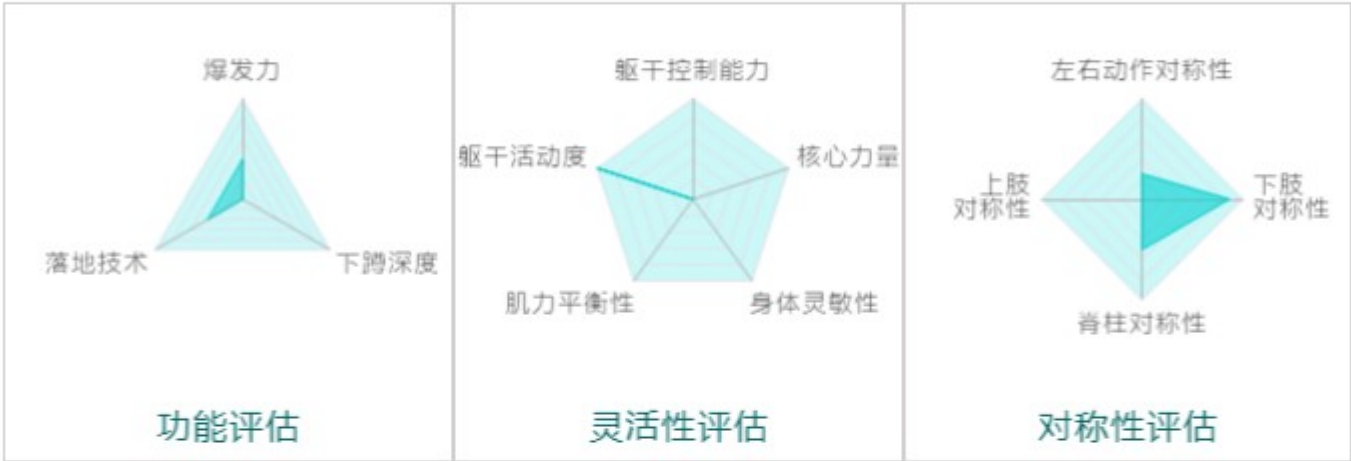

## 运动处方

| 动作名称          | 组数     | 次数   |
|---------------|--------|------|
| 臀部肌群拉伸训练_初级_1 | 每次3组   | 每周3次 |
| 下肢前链拉伸训练_高级_2 | 每次3-5组 | 每周2次 |
| 小腿后群拉伸训练_初级_1 | 每次2-3组 | 每周3次 |

Supplement: Supplementary file 266 [file 张文茹.pdf › ntelligent motion capture system/张文茹.pdf]

# 智能体能测评结果报告

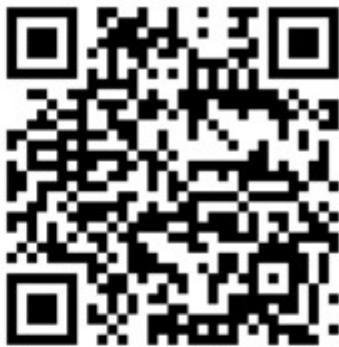

## 测试结果

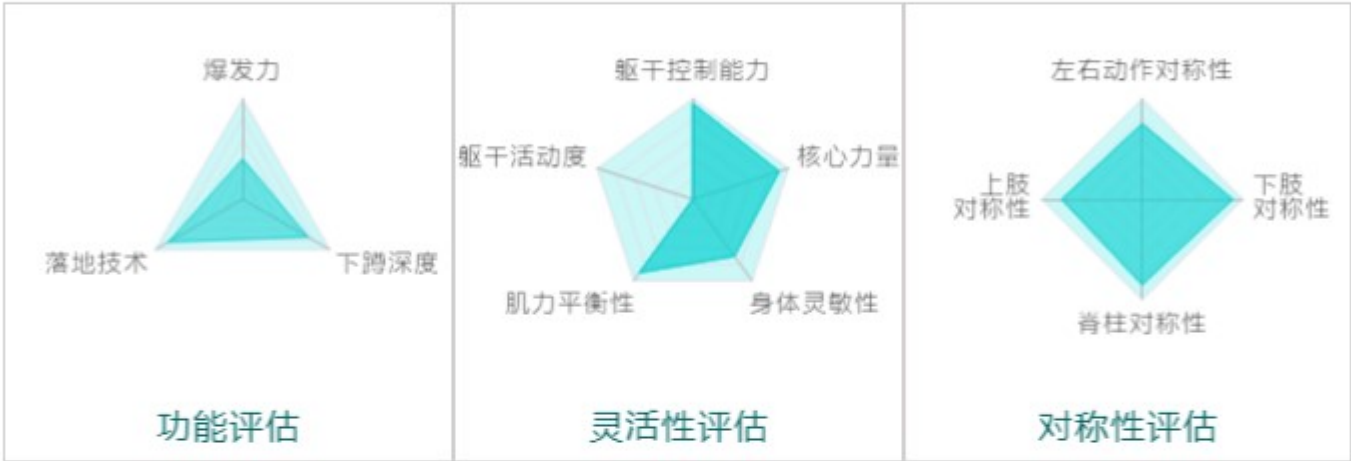

## 运动处方

| 动作名称          | 组数     | 次数          |
|---------------|--------|-------------|
| 大腿外侧链拉伸_初级_1  | 每次2-3组 | 训练计划：每周1-2次 |
| 臀部肌群拉伸训练_初级_1 | 每次3组   | 每周3次        |
| 臀部肌群拉伸训练_进阶_3 | 每次3-5组 | 每周3次        |

Supplement: Supplementary file 267 [file 张文雅.pdf › ntelligent motion capture system/张文雅.pdf]

# 智能体能测评结果报告

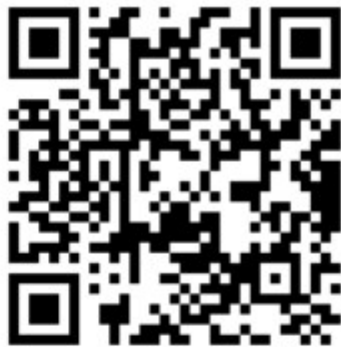

## 测试结果

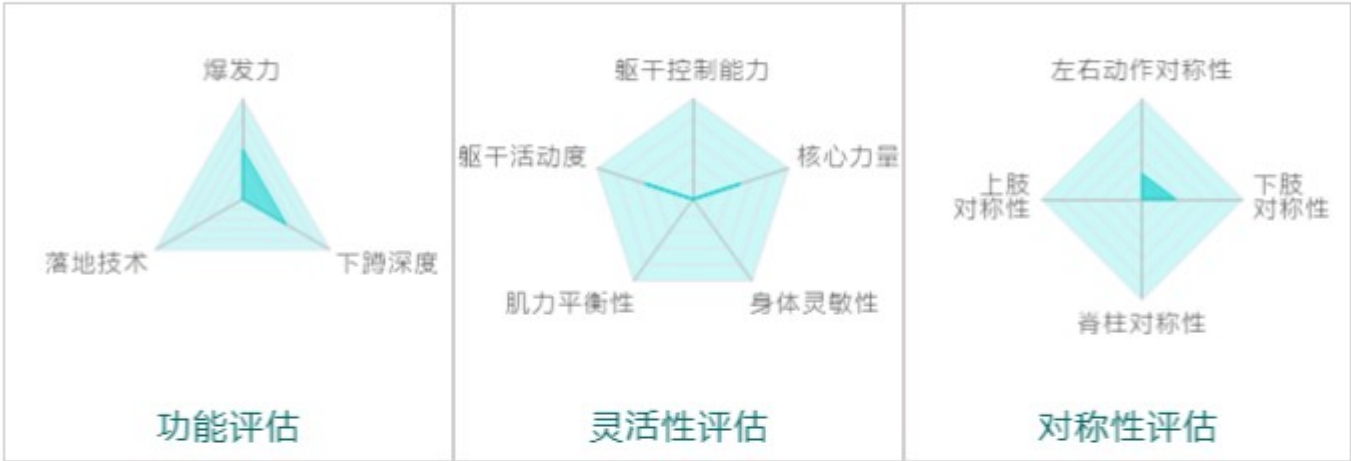

## 运动处方

| 动作名称            | 组数     | 次数          |
|-----------------|--------|-------------|
| 腰背部拉伸训练_入门_5    | 每次3组   | 每周2次        |
| 大腿后侧肌群拉伸训练_初级_3 | 每次3-5组 | 每周3次        |
| 大腿外侧链拉伸_初级_1    | 每次2-3组 | 训练计划：每周1-2次 |

Supplement: Supplementary file 268 [file 张旭博.pdf › ntelligent motion capture system/张旭博.pdf]

# 智能体能测评结果报告

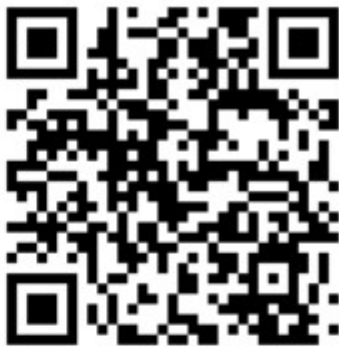

## 测试结果

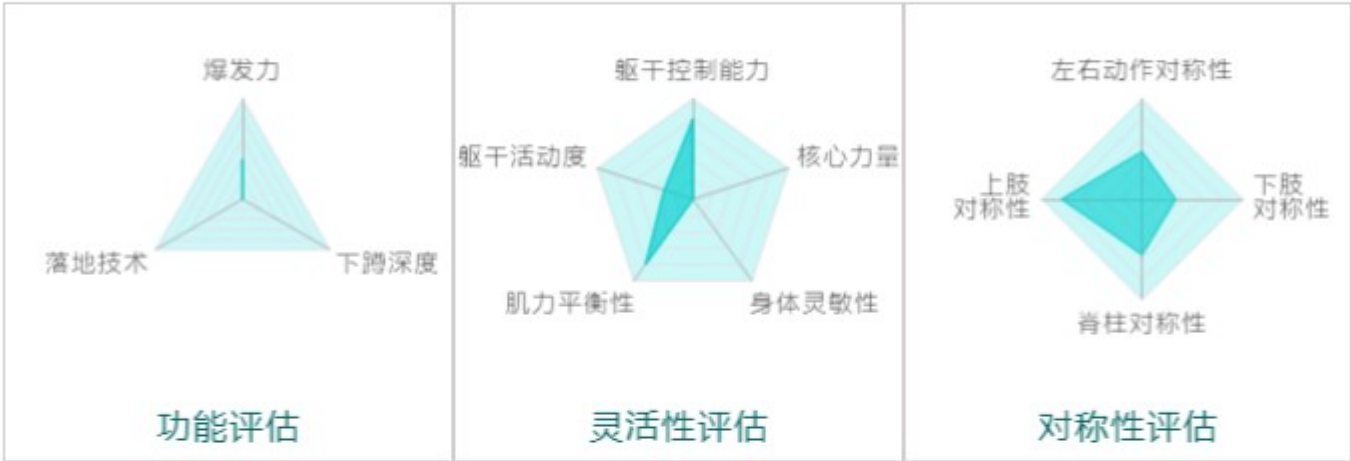

## 运动处方

| 动作名称          | 组数     | 次数   |
|---------------|--------|------|
| 臀部肌群拉伸训练_进阶_3 | 每次3-5组 | 每周3次 |
| 臀部肌群拉伸训练_初级_1 | 每次3组   | 每周3次 |
| 下肢前链拉伸训练_初级_2 | 每次3-5组 | 每周3次 |

Supplement: Supplementary file 269 [file 张译丹.pdf › ntelligent motion capture system/张译丹.pdf]

# 智能体能测评结果报告

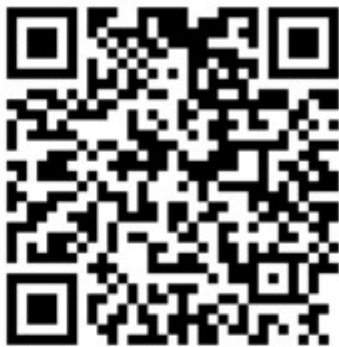

## 测试结果

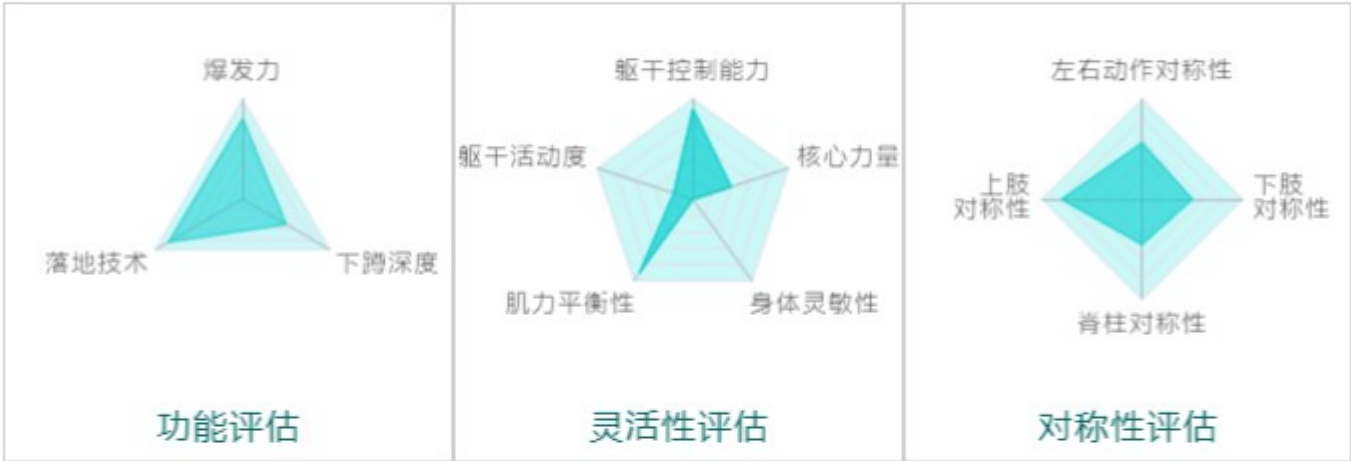

## 运动处方

| 动作名称            | 组数     | 次数     |
|-----------------|--------|--------|
| 大腿后侧肌群拉伸训练_入门_1 | 每次3组   | 每周2次   |
| 腹部拉伸训练_进阶_1     | 每次2组   | 每周3次   |
| 大腿外侧链拉伸_入门_1    | 每次2-3组 | 每周1-2次 |

Supplement: Supplementary file 270 [file 智豪龙.pdf › ntelligent motion capture system/智豪龙.pdf]

# 智能体能测评结果报告

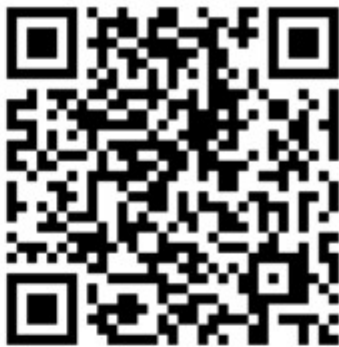

## 测试结果

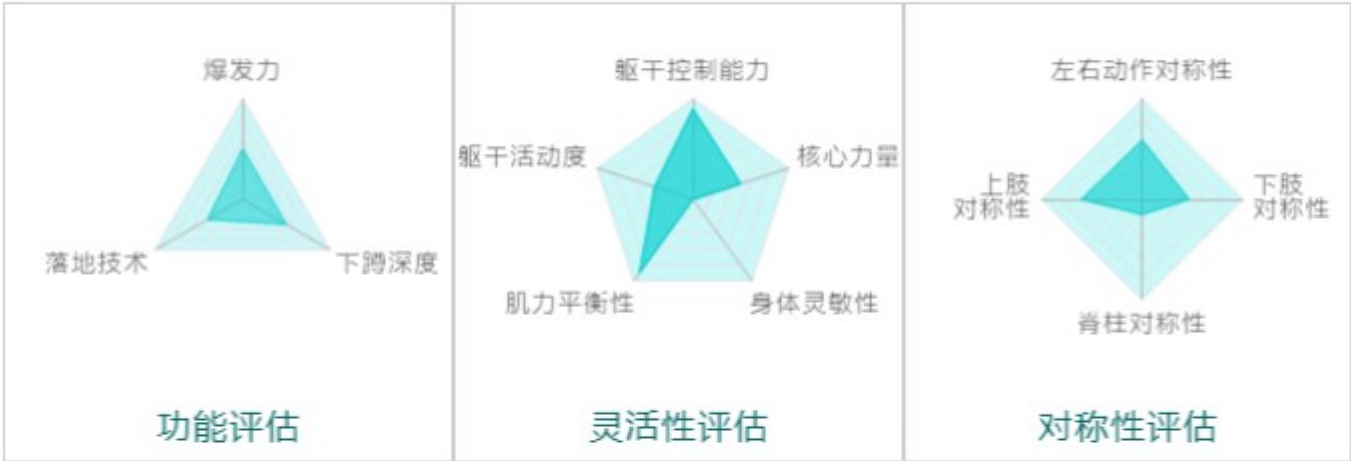

## 运动处方

| 动作名称            | 组数     | 次数          |
|-----------------|--------|-------------|
| 大腿外侧链拉伸_初级_1    | 每次2-3组 | 训练计划：每周1-2次 |
| 大腿后侧肌群拉伸训练_入门_1 | 每次3组   | 每周2次        |
| 下肢前链拉伸训练_初级_3   | 每次3-5组 | 每周3次        |

Supplement: Supplementary file 271 [file 曾颖雯.pdf › ntelligent motion capture system/曾颖雯.pdf]

# 智能体能测评结果报告

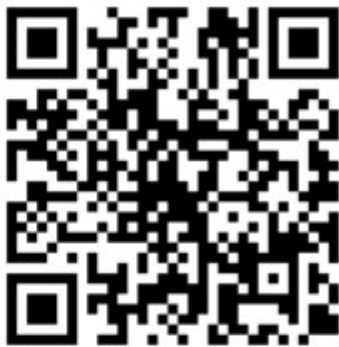

## 测试结果

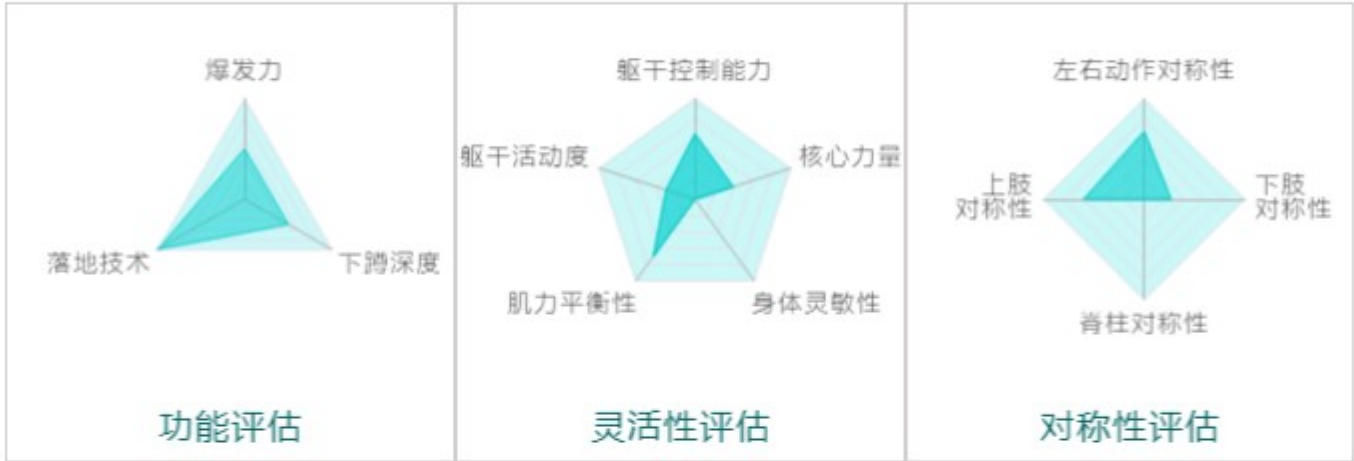

## 运动处方

| 动作名称          | 组数     | 次数   |
|---------------|--------|------|
| 臀部肌群拉伸训练_初级_2 | 每次3组   | 每周3次 |
| 臀部肌群拉伸训练_进阶_1 | 每次3-5组 | 每周3次 |
| 下肢前链拉伸训练_初级_2 | 每次3-5组 | 每周3次 |

Supplement: Supplementary file 272 [file 朱梓齐.pdf › ntelligent motion capture system/朱梓齐.pdf]

# 智能体能测评结果报告

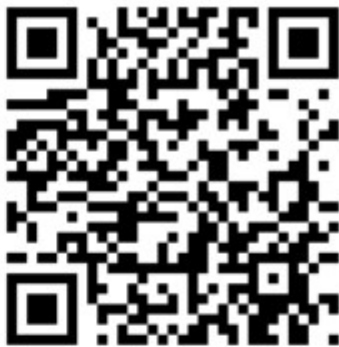

## 测试结果

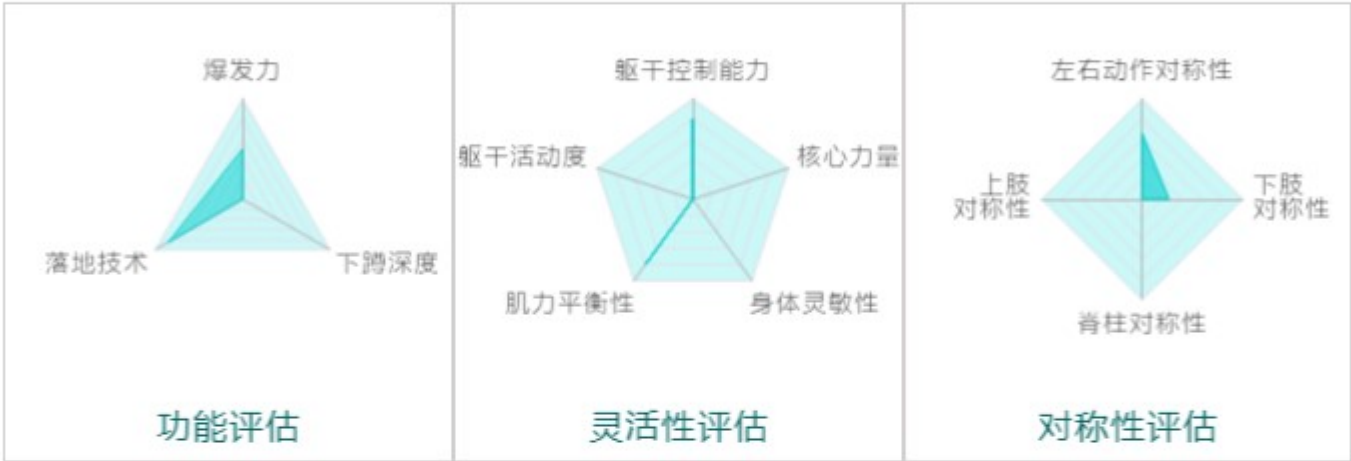

## 运动处方

| 动作名称          | 组数     | 次数   |
|---------------|--------|------|
| 臀部肌群拉伸训练_初级_2 | 每次3组   | 每周3次 |
| 臀部肌群拉伸训练_进阶_3 | 每次3-5组 | 每周3次 |
| 臀部肌群拉伸训练_初级_1 | 每次3组   | 每周3次 |

Supplement: Supplementary file 273 [file 李冰冰.pdf › ntelligent motion capture system/李冰冰.pdf]

# 智能体能测评结果报告

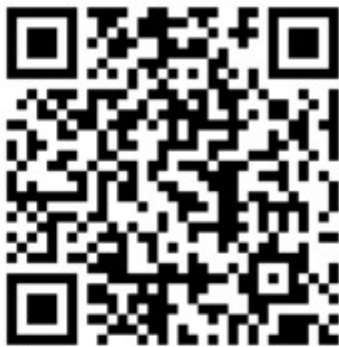

## 测试结果

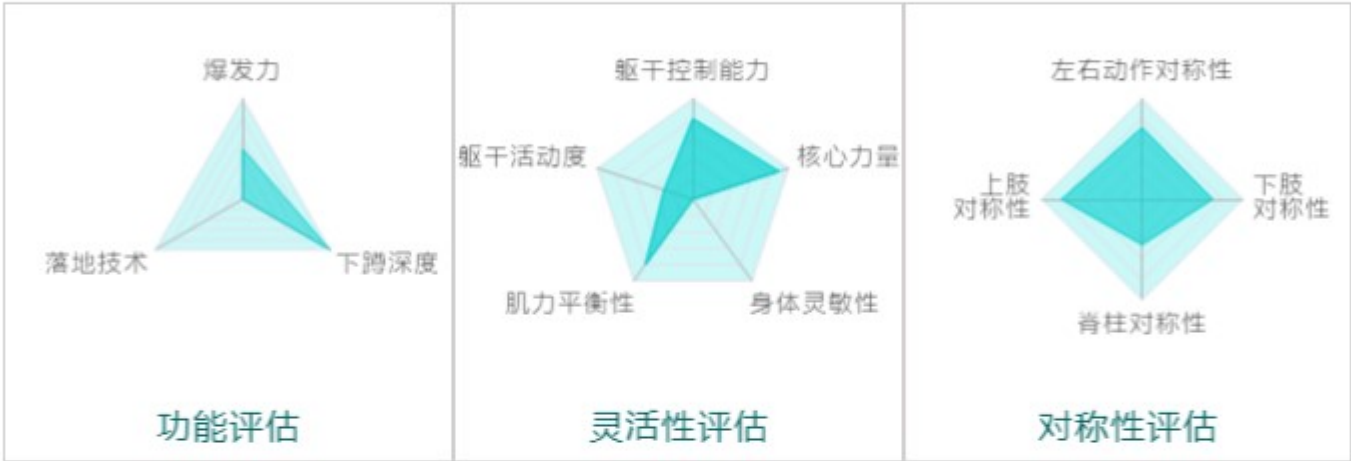

## 运动处方

| 动作名称            | 组数     | 次数   |
|-----------------|--------|------|
| 大腿后侧肌群拉伸训练_入门_1 | 每次3组   | 每周2次 |
| 臀部肌群拉伸训练_进阶_3   | 每次3-5组 | 每周3次 |
| 腹部拉伸训练_进阶_2     | 每次2组   | 每周3次 |

Supplement: Supplementary file 274 [file 杨帆.pdf › ntelligent motion capture system/杨帆.pdf]

# 智能体能测评结果报告

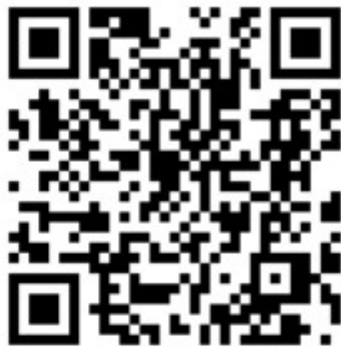

## 测试结果

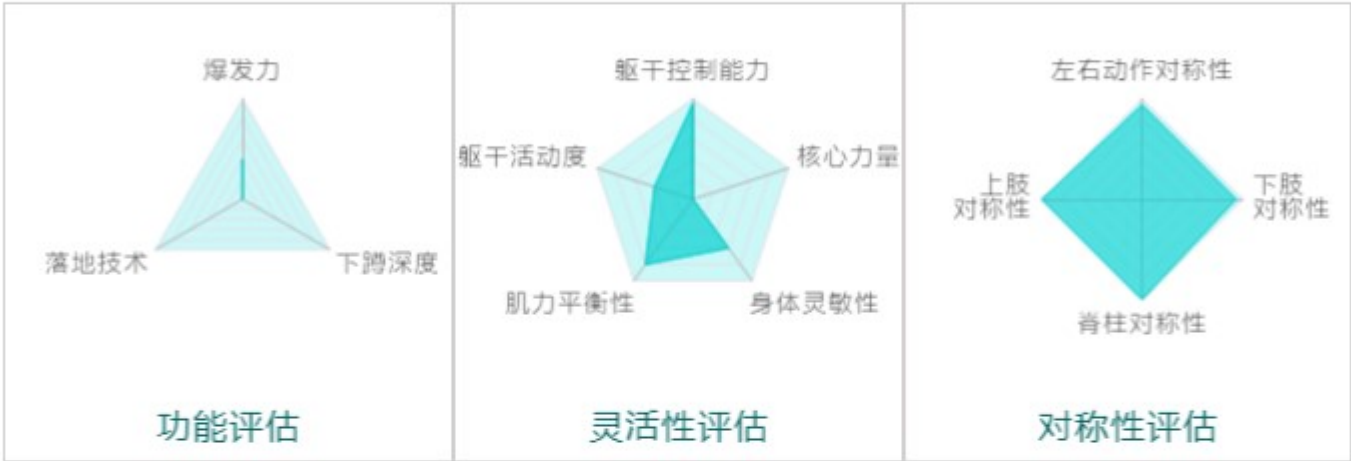

## 运动处方

| 动作名称          | 组数     | 次数          |
|---------------|--------|-------------|
| 臀部肌群拉伸训练_初级_1 | 每次3组   | 每周3次        |
| 下肢前链拉伸训练_高级_3 | 每次3-5组 | 每周2次        |
| 大腿外侧链拉伸_初级_1  | 每次2-3组 | 训练计划：每周1-2次 |

Supplement: Supplementary file 275 [file 杨雯杰.pdf › ntelligent motion capture system/杨雯杰.pdf]

# 智能体能测评结果报告

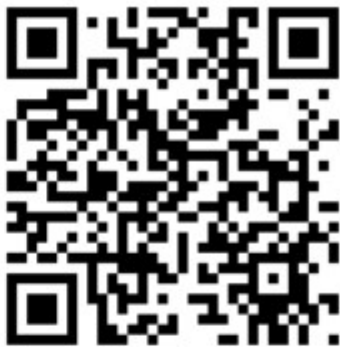

## 测试结果

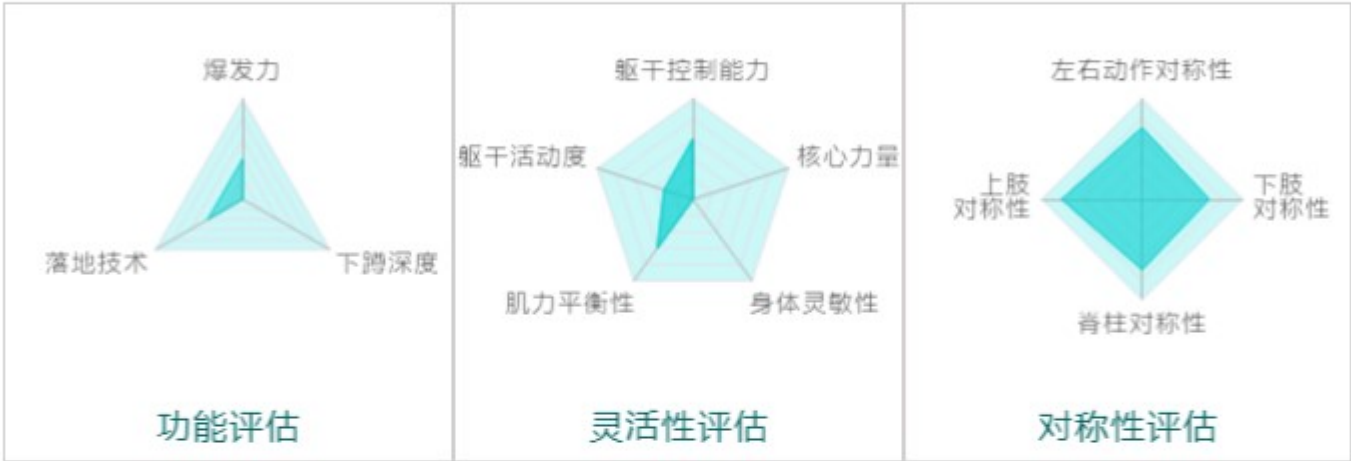

## 运动处方

| 动作名称          | 组数     | 次数   |
|---------------|--------|------|
| 臀部肌群拉伸训练_初级_1 | 每次3组   | 每周3次 |
| 下肢前链拉伸训练_高级_2 | 每次3-5组 | 每周2次 |
| 臀部肌群拉伸训练_初级_3 | 每次3-5组 | 每周3次 |

Supplement: Supplementary file 276 [file 林茜.pdf › ntelligent motion capture system/林茜.pdf]

# 智能体能测评结果报告

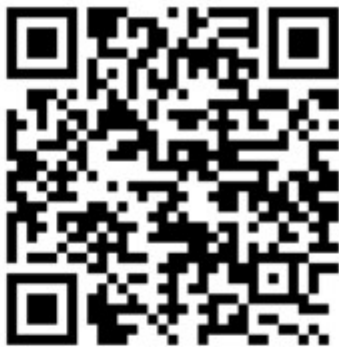

## 测试结果

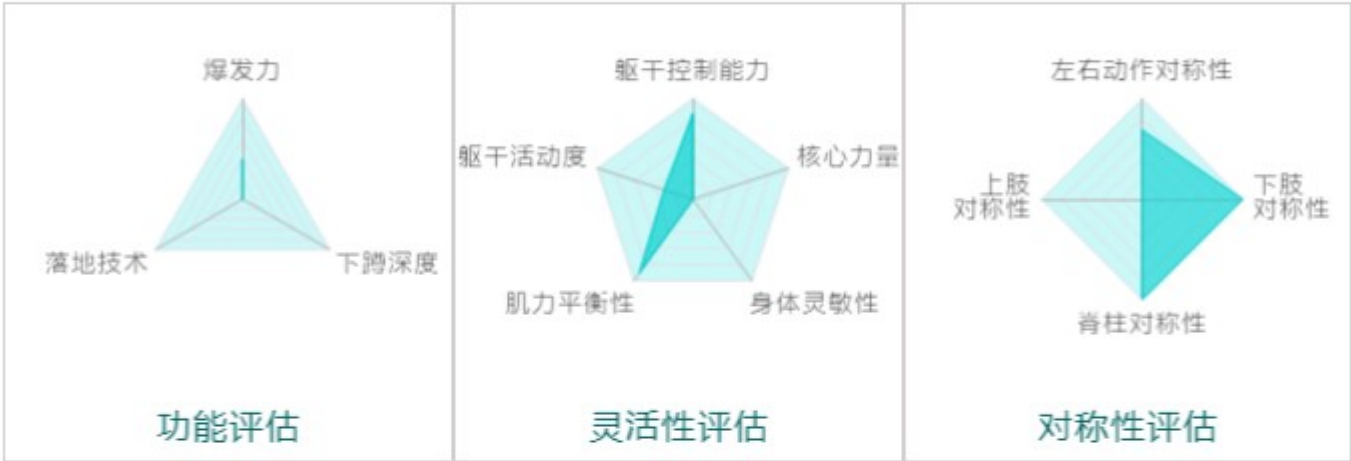

## 运动处方

| 动作名称          | 组数     | 次数   |
|---------------|--------|------|
| 臀部肌群拉伸训练_进阶_4 | 每次3-5组 | 每周3次 |
| 臀部肌群拉伸训练_初级_1 | 每次3组   | 每周3次 |
| 下肢前链拉伸训练_高级_3 | 每次3-5组 | 每周2次 |

Supplement: Supplementary file 277 [file 柳丹琦.pdf › ntelligent motion capture system/柳丹琦.pdf]

# 智能体能测评结果报告

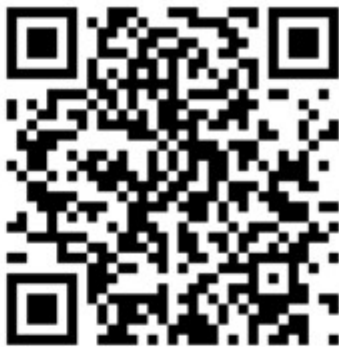

## 测试结果

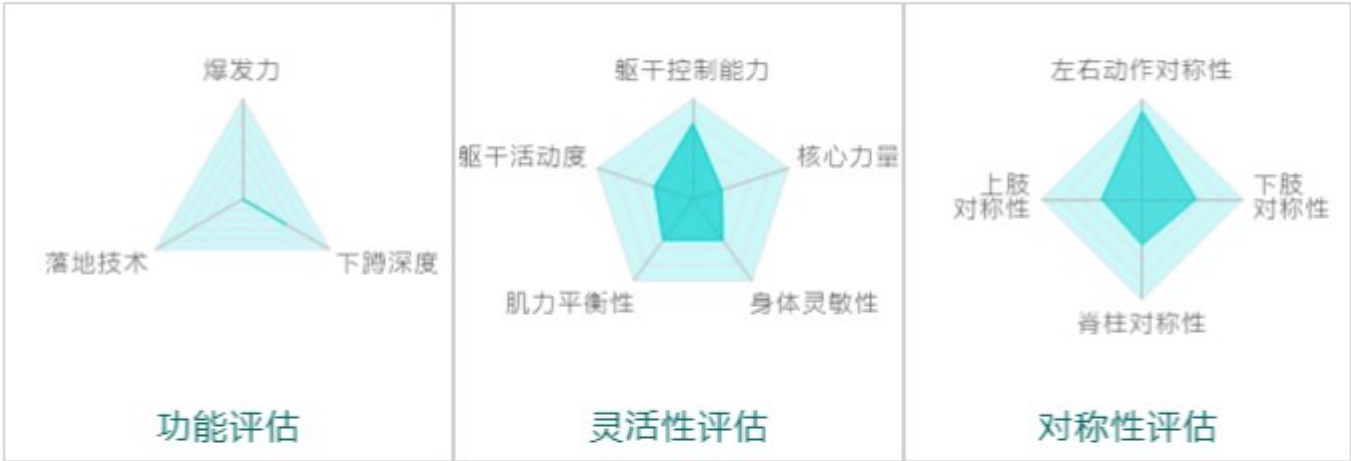

## 运动处方

| 动作名称            | 组数     | 次数          |
|-----------------|--------|-------------|
| 大腿外侧链拉伸_初级_1    | 每次2-3组 | 训练计划：每周1-2次 |
| 大腿后侧肌群拉伸训练_入门_1 | 每次3组   | 每周2次        |
| 臀部肌群拉伸训练_进阶_3   | 每次3-5组 | 每周3次        |

Supplement: Supplementary file 278 [file 梁栋.pdf › ntelligent motion capture system/梁栋.pdf]

# 智能体能测评结果报告

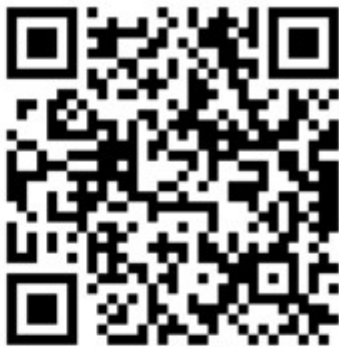

## 测试结果

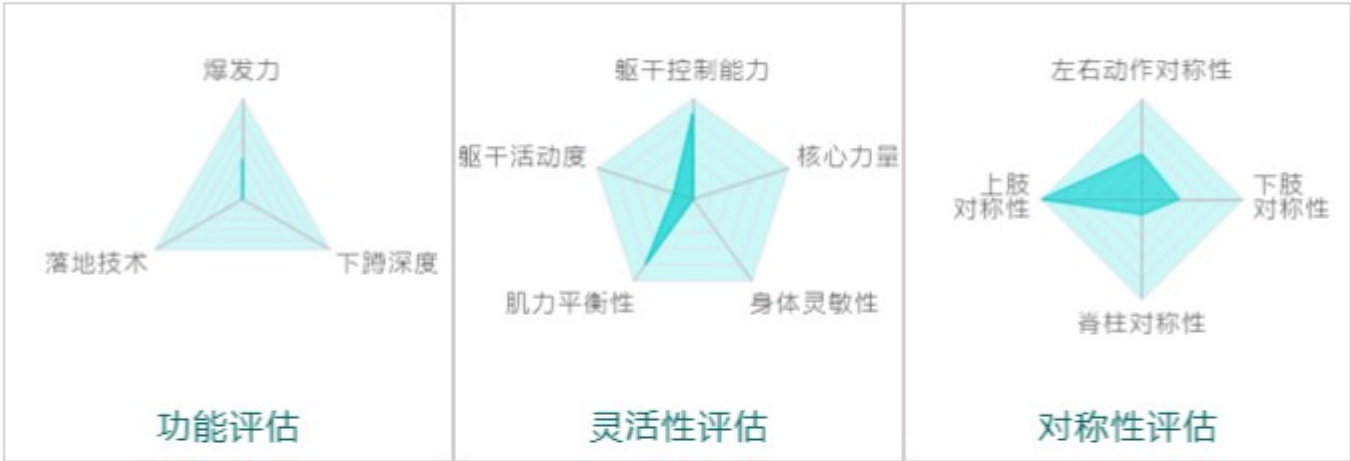

## 运动处方

| 动作名称          | 组数     | 次数   |
|---------------|--------|------|
| 臀部肌群拉伸训练_进阶_4 | 每次3-5组 | 每周3次 |
| 臀部肌群拉伸训练_初级_1 | 每次3组   | 每周3次 |
| 下肢前链拉伸训练_初级_1 | 每次3组   | 每周3次 |

Supplement: Supplementary file 279 [file 段瑶.pdf › ntelligent motion capture system/段瑶.pdf]

# 智能体能测评结果报告

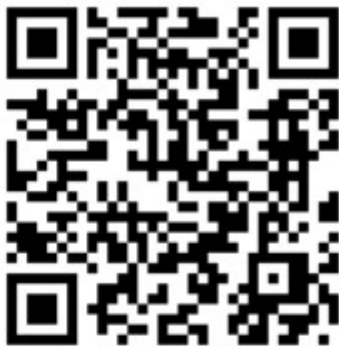

## 测试结果

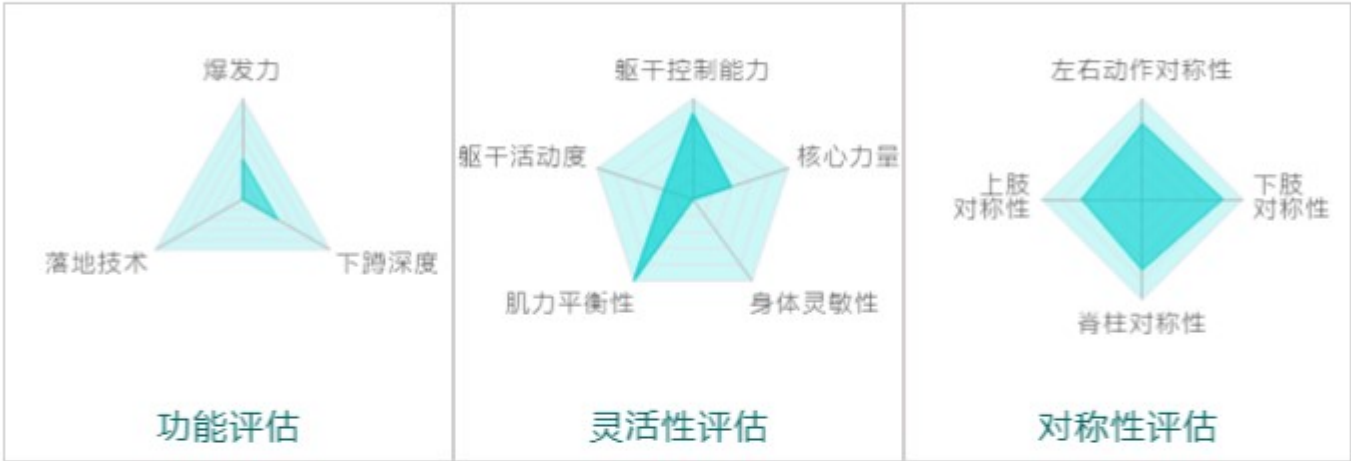

## 运动处方

| 动作名称            | 组数     | 次数   |
|-----------------|--------|------|
| 臀部肌群拉伸训练_初级_2   | 每次3组   | 每周3次 |
| 臀部肌群拉伸训练_进阶_4   | 每次3-5组 | 每周3次 |
| 大腿后侧肌群拉伸训练_初级_2 | 每次3组   | 每周2次 |

Supplement: Supplementary file 280 [file 毋梦鑫.pdf › ntelligent motion capture system/毋梦鑫.pdf]

# 智能体能测评结果报告

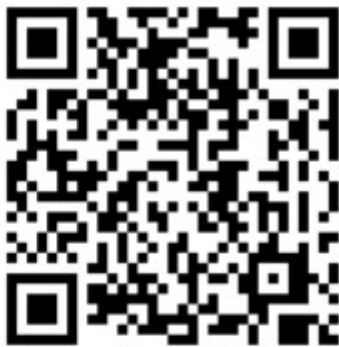

## 测试结果

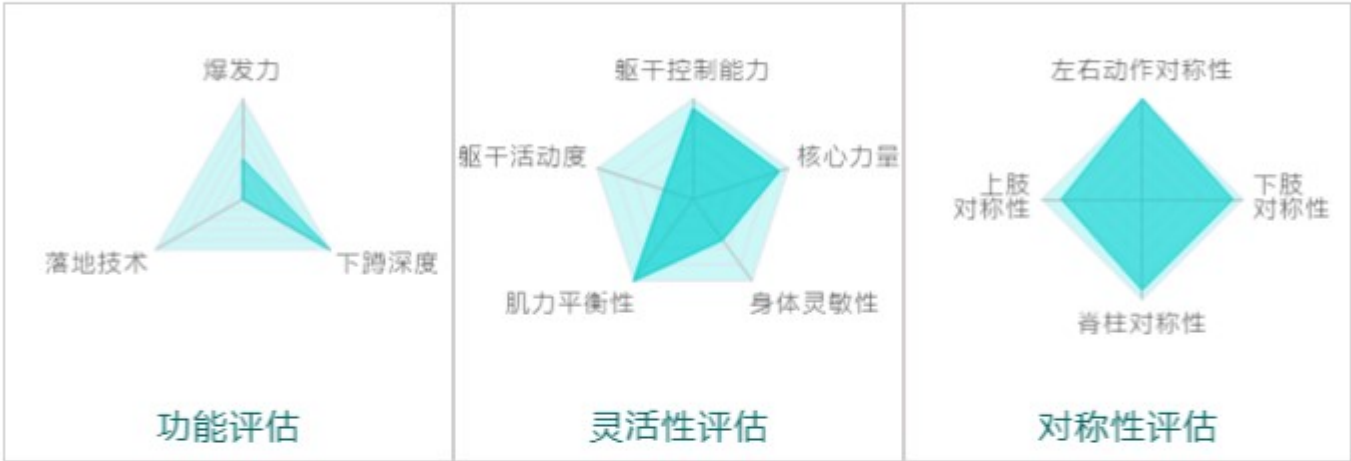

## 运动处方

| 动作名称          | 组数     | 次数          |
|---------------|--------|-------------|
| 大腿外侧链拉伸_初级_1  | 每次2-3组 | 训练计划：每周1-2次 |
| 臀部肌群拉伸训练_初级_2 | 每次3组   | 每周3次        |
| 腹部拉伸训练_进阶_2   | 每次2组   | 每周3次        |

Supplement: Supplementary file 281 [file 温欢.pdf › ntelligent motion capture system/温欢.pdf]

# 智能体能测评结果报告

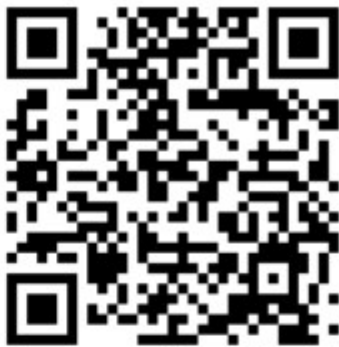

## 测试结果

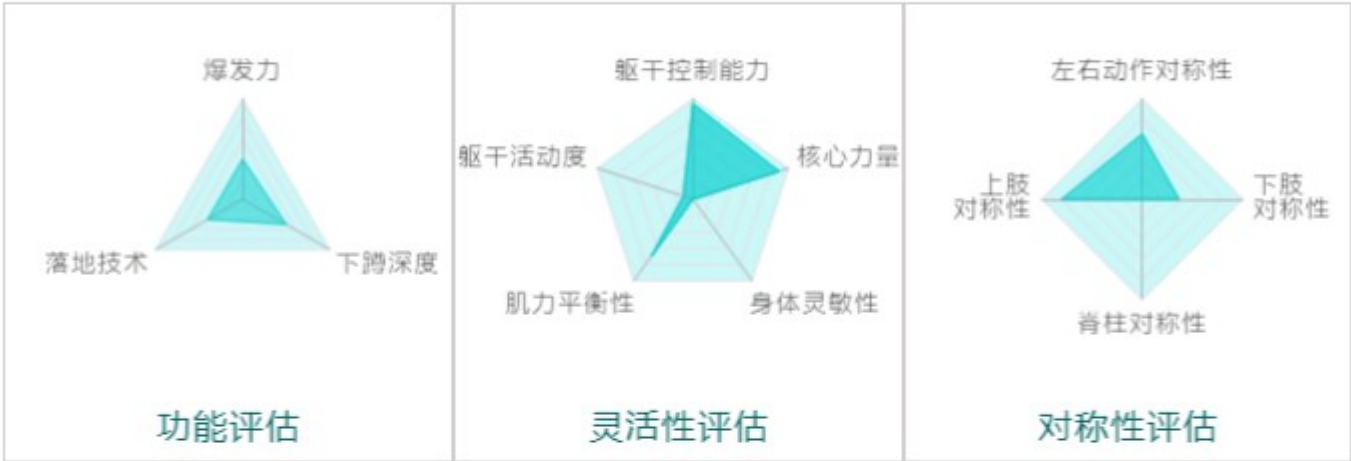

## 运动处方

| 动作名称            | 组数     | 次数   |
|-----------------|--------|------|
| 腹部拉伸训练_初级_1     | 每次3组   | 每周3次 |
| 大腿后侧肌群拉伸训练_入门_1 | 每次3组   | 每周2次 |
| 下肢前链拉伸训练_入门_3   | 每次3-5组 | 每周3次 |

Supplement: Supplementary file 282 [file 王佳.pdf › ntelligent motion capture system/王佳.pdf]

# 智能体能测评结果报告

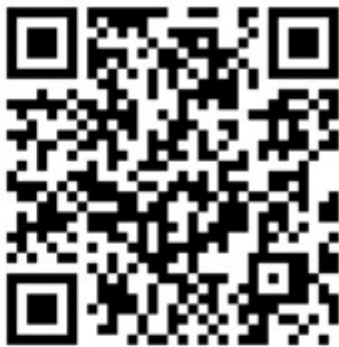

## 测试结果

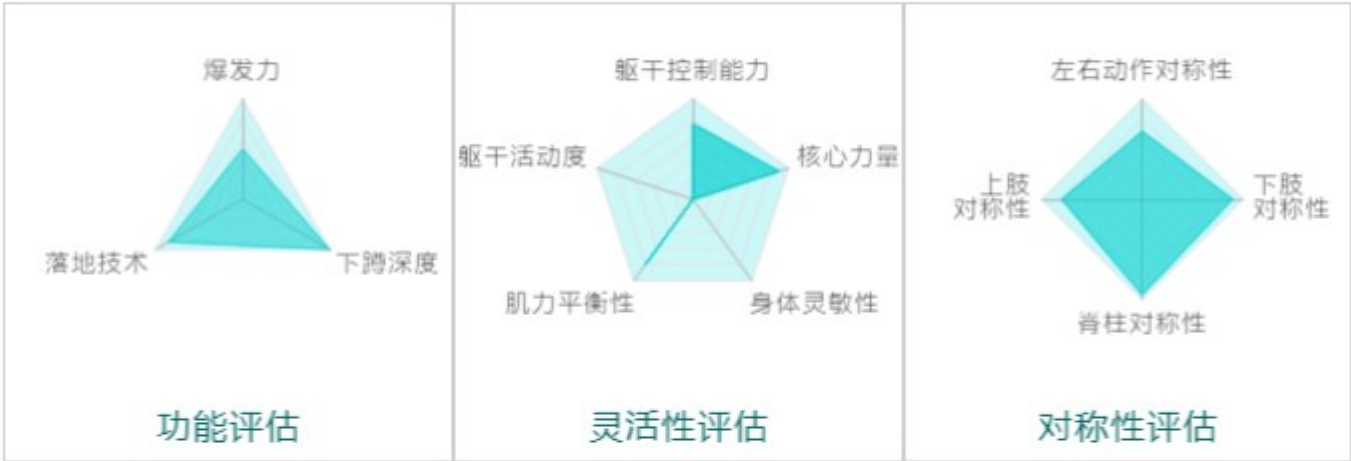

## 运动处方

| 动作名称            | 组数     | 次数   |
|-----------------|--------|------|
| 大腿后侧肌群拉伸训练_入门_1 | 每次3组   | 每周2次 |
| 臀部肌群拉伸训练_进阶_3   | 每次3-5组 | 每周3次 |
| 小腿后群拉伸训练_初级_2   | 每次3-5组 | 每周3次 |

Supplement: Supplementary file 283 [file 王俊熙.pdf › ntelligent motion capture system/王俊熙.pdf]

# 智能体能测评结果报告

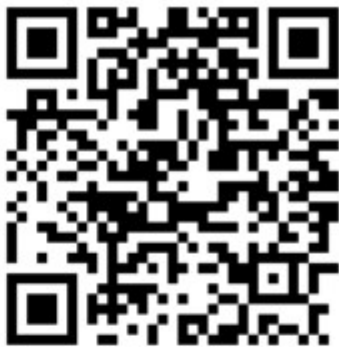

## 测试结果

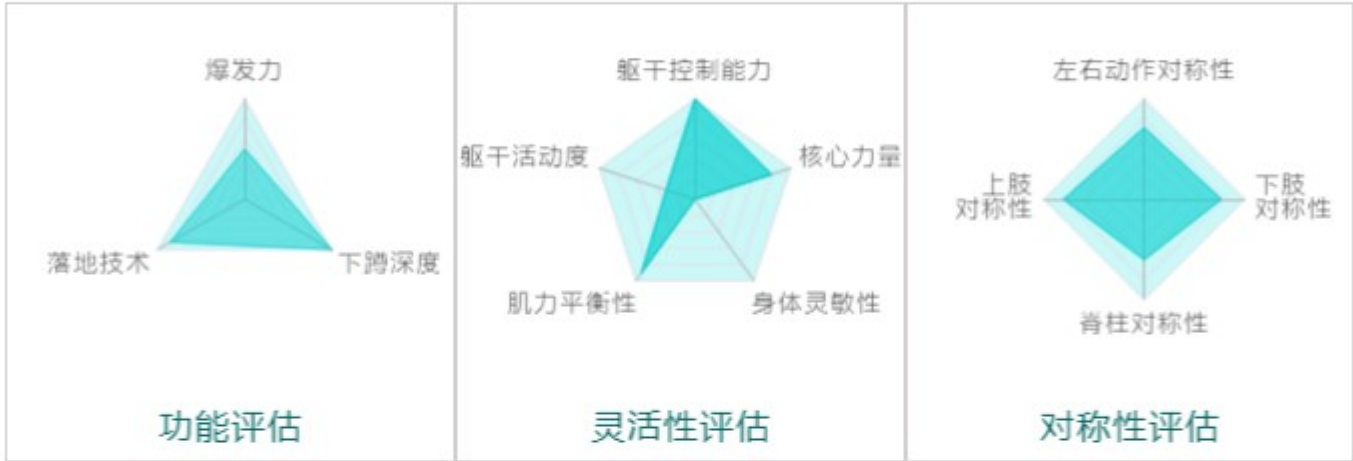

## 运动处方

| 动作名称          | 组数     | 次数   |
|---------------|--------|------|
| 臀部肌群拉伸训练_初级_2 | 每次3组   | 每周3次 |
| 腹部拉伸训练_进阶_2   | 每次2组   | 每周3次 |
| 小腿后群拉伸训练_初级_2 | 每次3-5组 | 每周3次 |

Supplement: Supplementary file 284 [file 王军艳.pdf › ntelligent motion capture system/王军艳.pdf]

# 智能体能测评结果报告

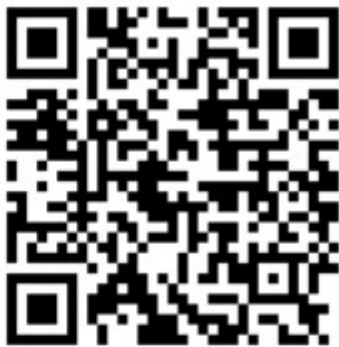

## 测试结果

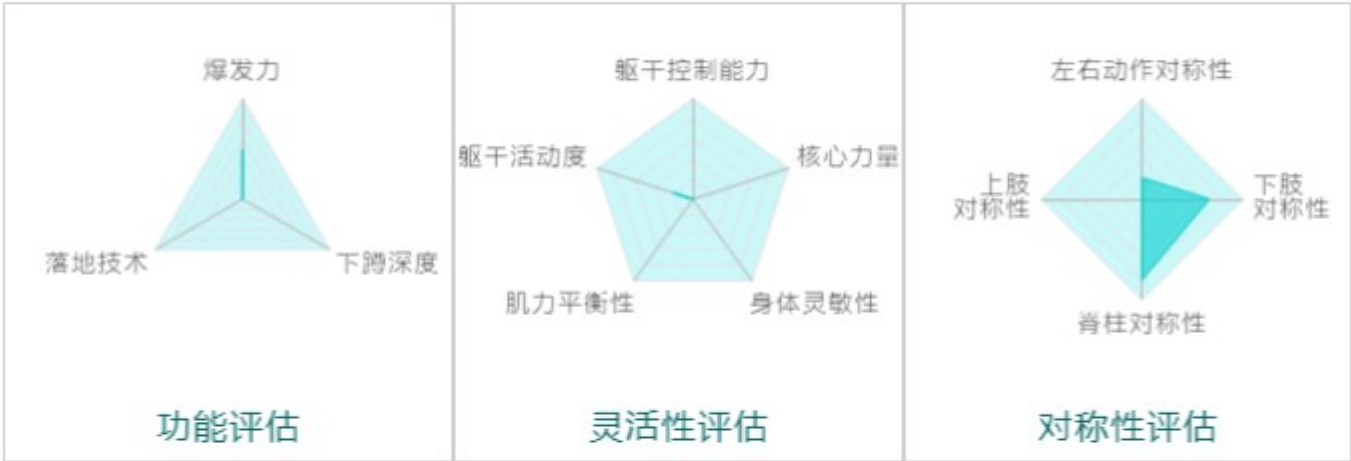

## 运动处方

| 动作名称          | 组数     | 次数   |
|---------------|--------|------|
| 臀部肌群拉伸训练_初级_1 | 每次3组   | 每周3次 |
| 下肢前链拉伸训练_高级_2 | 每次3-5组 | 每周2次 |
| 腹部拉伸训练_进阶_1   | 每次2组   | 每周3次 |

Supplement: Supplementary file 285 [file 王思奕.pdf › ntelligent motion capture system/王思奕.pdf]

# 智能体能测评结果报告

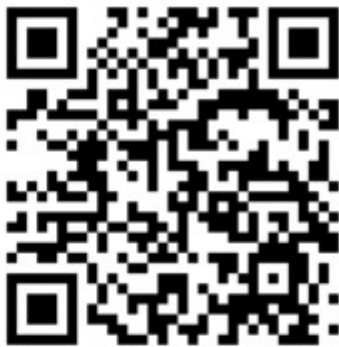

## 测试结果

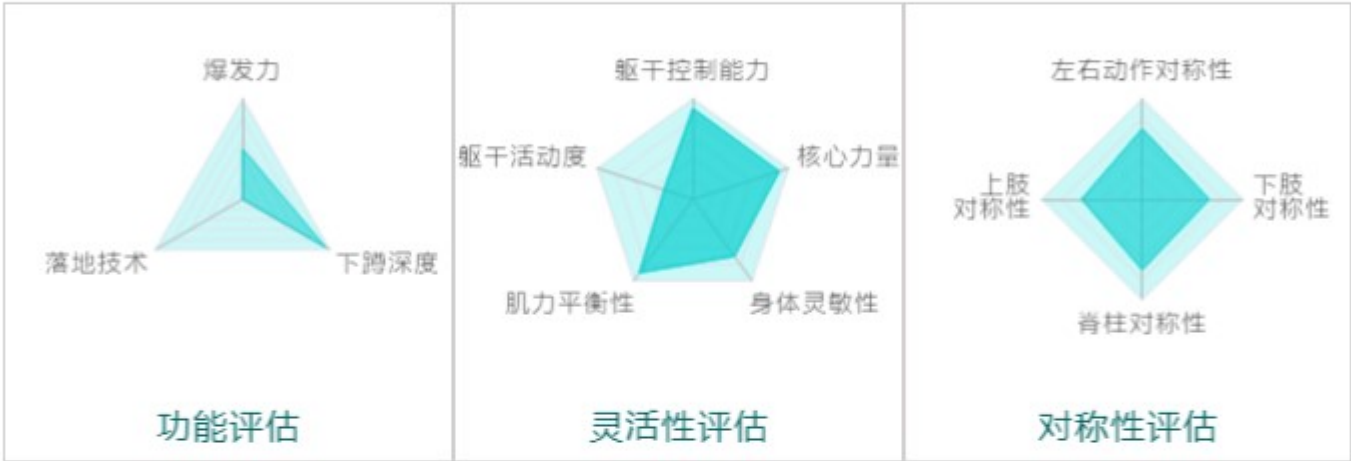

## 运动处方

| 动作名称            | 组数     | 次数          |
|-----------------|--------|-------------|
| 大腿外侧链拉伸_初级_1    | 每次2-3组 | 训练计划：每周1-2次 |
| 大腿后侧肌群拉伸训练_入门_1 | 每次3组   | 每周2次        |
| 腹部拉伸训练_进阶_2     | 每次2组   | 每周3次        |

Supplement: Supplementary file 286 [file 王懿佳.pdf › ntelligent motion capture system/王懿佳.pdf]

# 智能体能测评结果报告

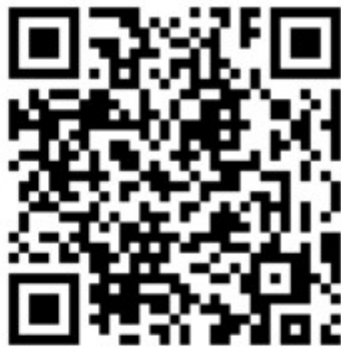

## 测试结果

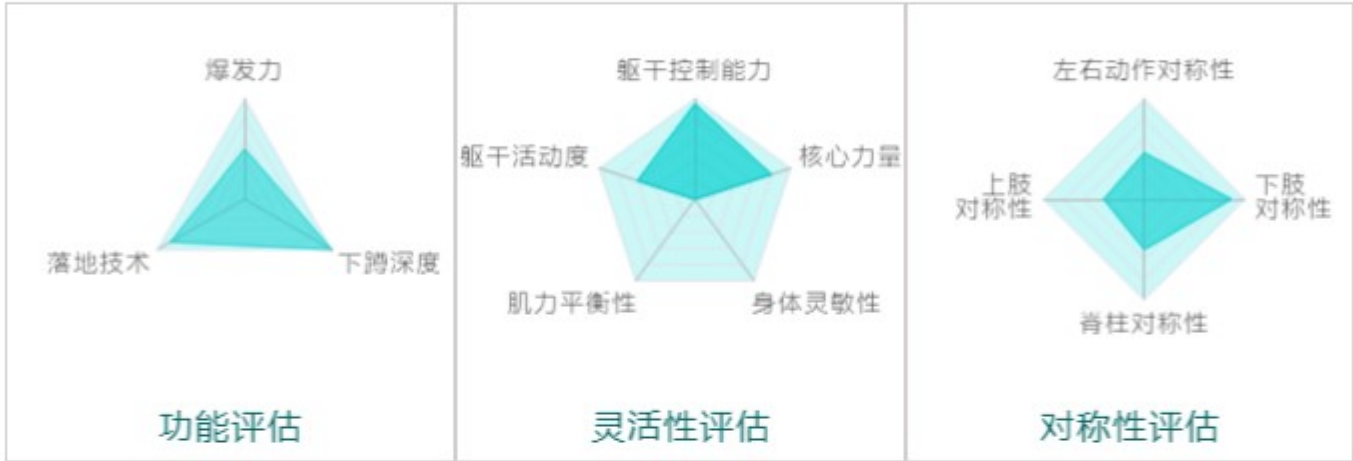

## 运动处方

| 动作名称          | 组数     | 次数   |
|---------------|--------|------|
| 上臂屈侧拉伸_初级_1   | 每次3组   | 每周2次 |
| 小腿后群拉伸训练_初级_2 | 每次3-5组 | 每周3次 |
| 腰背部拉伸训练_入门_6  | 每次3组   | 每周3次 |

Supplement: Supplementary file 287 [file 王淑欣.pdf › ntelligent motion capture system/王淑欣.pdf]

# 智能体能测评结果报告

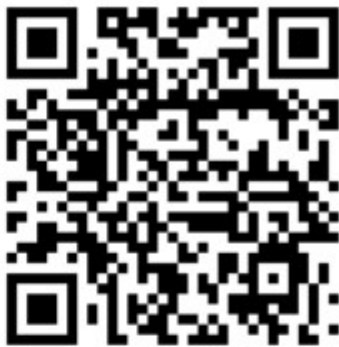

## 测试结果

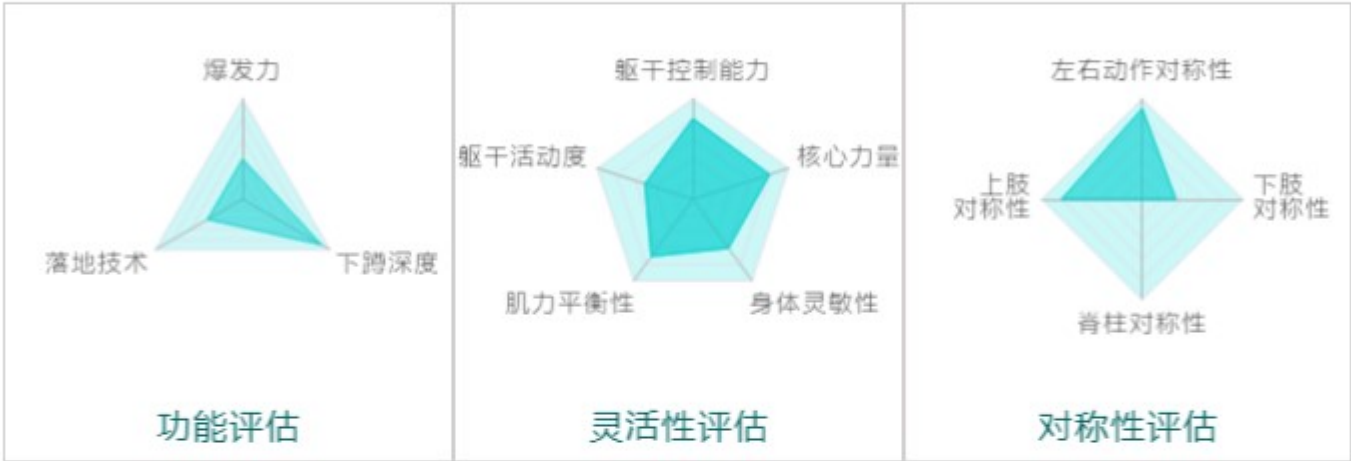

## 运动处方

| 动作名称            | 组数     | 次数          |
|-----------------|--------|-------------|
| 大腿外侧链拉伸_初级_1    | 每次2-3组 | 训练计划：每周1-2次 |
| 大腿后侧肌群拉伸训练_入门_1 | 每次3组   | 每周2次        |
| 臀部肌群拉伸训练_进阶_3   | 每次3-5组 | 每周3次        |

Supplement: Supplementary file 288 [file 王珊珊.pdf › ntelligent motion capture system/王珊珊.pdf]

# 智能体能测评结果报告

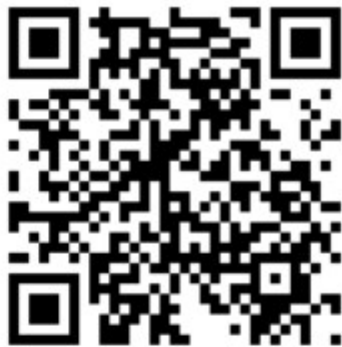

## 测试结果

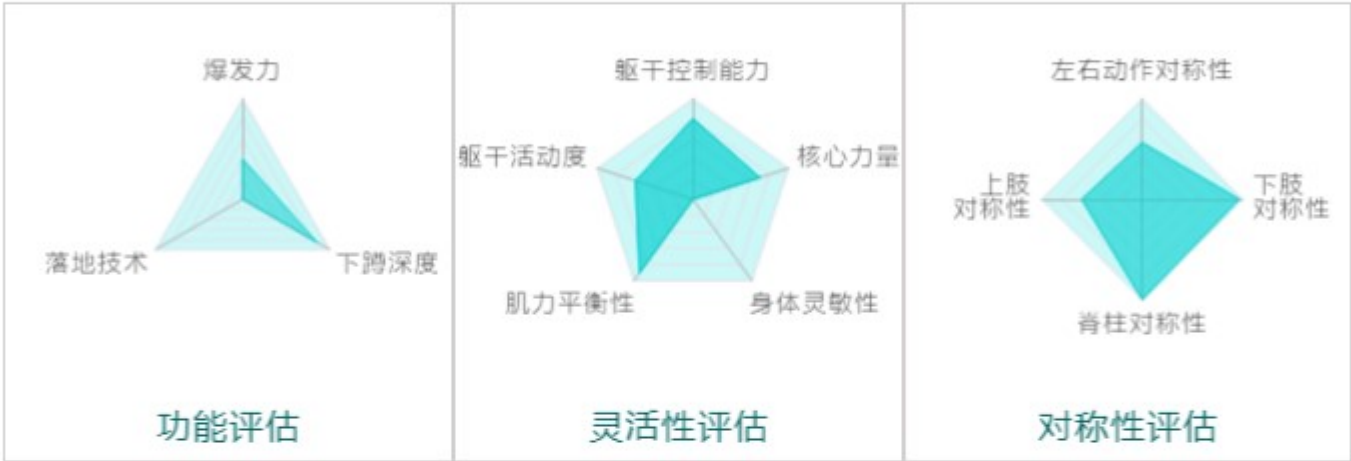

## 运动处方

| 动作名称            | 组数     | 次数   |
|-----------------|--------|------|
| 大腿后侧肌群拉伸训练_入门_1 | 每次3组   | 每周2次 |
| 臀部肌群拉伸训练_进阶_3   | 每次3-5组 | 每周3次 |
| 小腿后群拉伸训练_初级_1   | 每次2-3组 | 每周3次 |

Supplement: Supplementary file 289 [file 王硕.pdf › ntelligent motion capture system/王硕.pdf]

# 智能体能测评结果报告

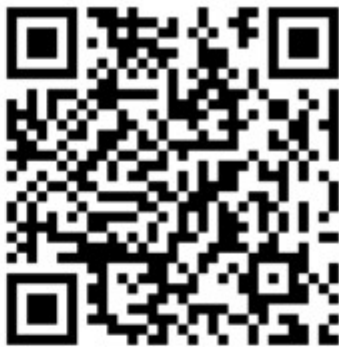

## 测试结果

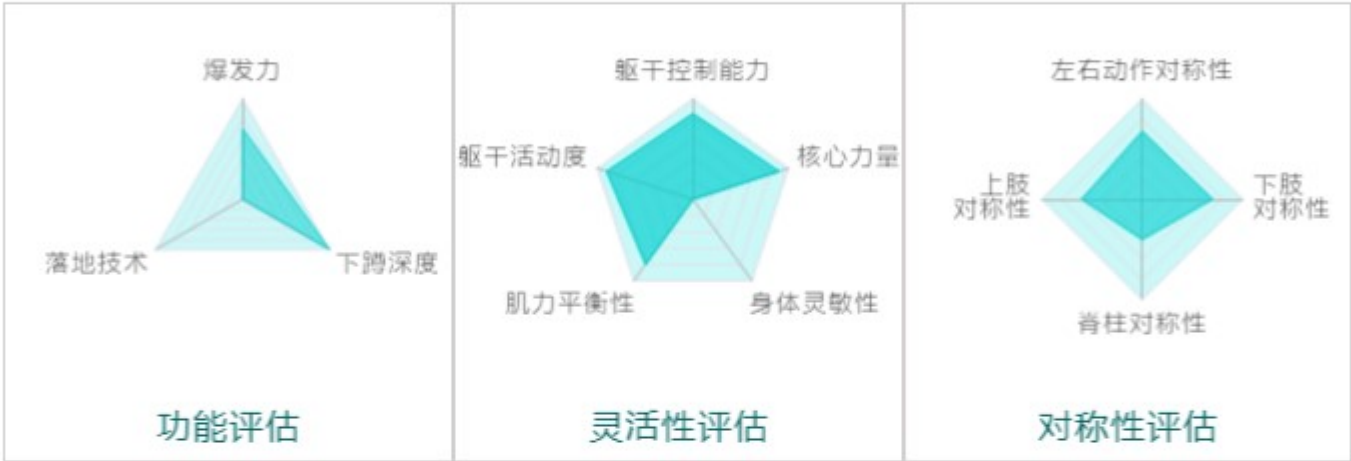

## 运动处方

| 动作名称          | 组数     | 次数   |
|---------------|--------|------|
| 臀部肌群拉伸训练_初级_2 | 每次3组   | 每周3次 |
| 臀部肌群拉伸训练_进阶_4 | 每次3-5组 | 每周3次 |
| 下肢前链拉伸训练_进阶_2 | 每次3-5组 | 每周3次 |

Supplement: Supplementary file 290 [file 王耀彬.pdf › ntelligent motion capture system/王耀彬.pdf]

# 智能体能测评结果报告

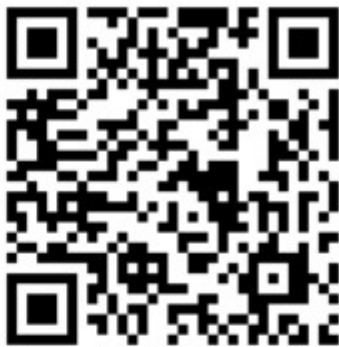

## 测试结果

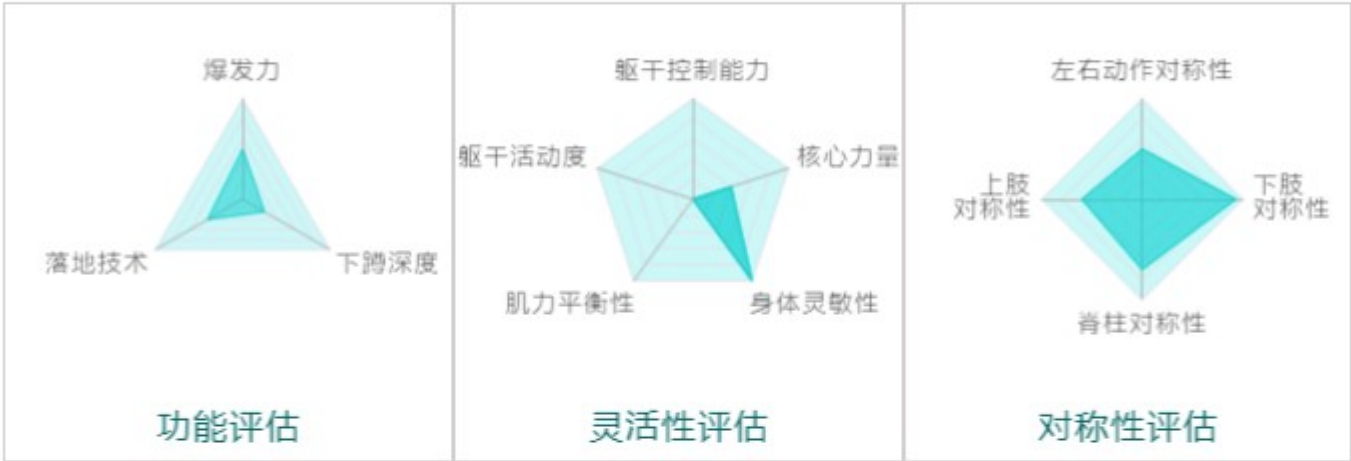

## 运动处方

| 动作名称          | 组数     | 次数   |
|---------------|--------|------|
| 大腿外侧链拉伸_进阶_1  | 每次3-5组 | 每周1次 |
| 下肢前链拉伸训练_初级_1 | 每次3组   | 每周3次 |
| 下肢前链拉伸训练_高级_3 | 每次3-5组 | 每周2次 |

Supplement: Supplementary file 291 [file 王舒畅.pdf › ntelligent motion capture system/王舒畅.pdf]

# 智能体能测评结果报告

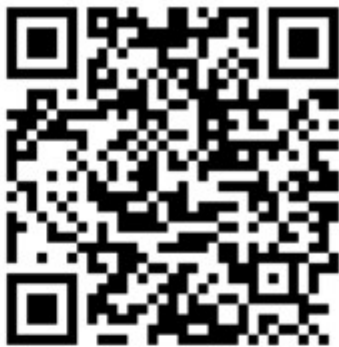

## 测试结果

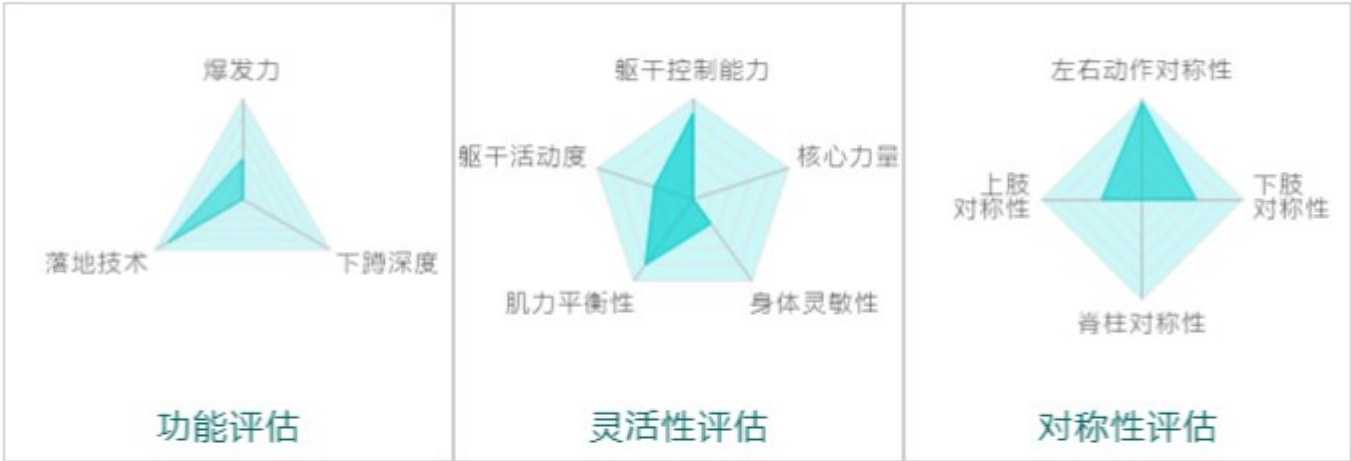

## 运动处方

| 动作名称          | 组数     | 次数   |
|---------------|--------|------|
| 臀部肌群拉伸训练_初级_2 | 每次3组   | 每周3次 |
| 臀部肌群拉伸训练_进阶_4 | 每次3-5组 | 每周3次 |
| 臀部肌群拉伸训练_初级_1 | 每次3组   | 每周3次 |

Supplement: Supplementary file 292 [file 王雅楠.pdf › ntelligent motion capture system/王雅楠.pdf]

# 智能体能测评结果报告

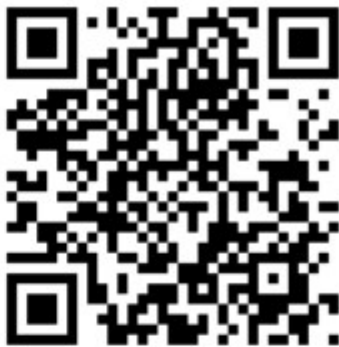

## 测试结果

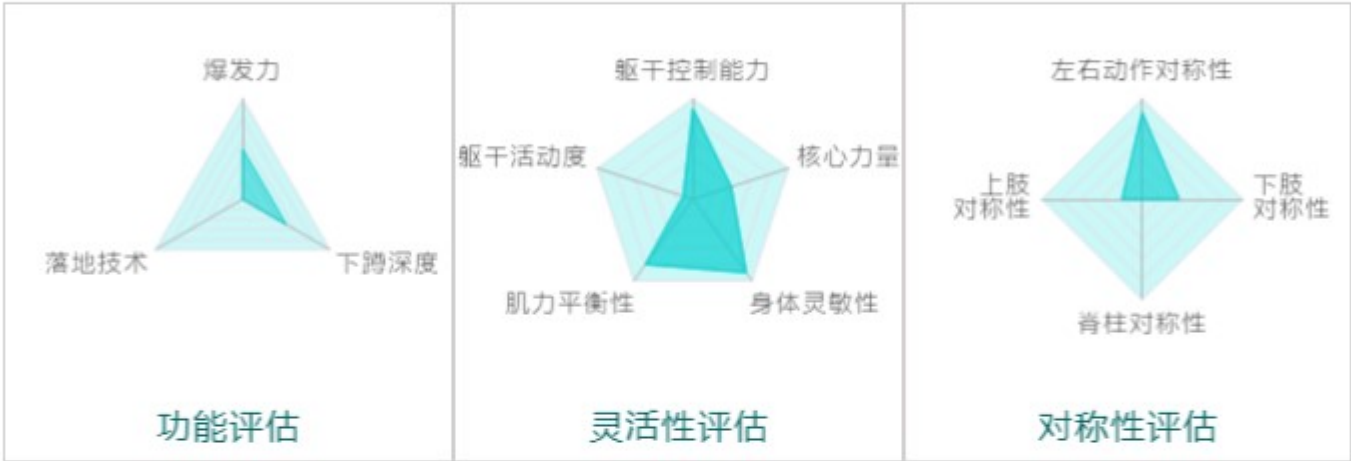

## 运动处方

| 动作名称          | 组数     | 次数          |
|---------------|--------|-------------|
| 下肢前链拉伸训练_入门_1 | 每次3-5组 | 每周3次        |
| 腹部拉伸训练_初级_1   | 每次3组   | 每周3次        |
| 大腿外侧链拉伸_初级_1  | 每次2-3组 | 训练计划：每周1-2次 |

Supplement: Supplementary file 293 [file 白立慧.pdf › ntelligent motion capture system/白立慧.pdf]

# 智能体能测评结果报告

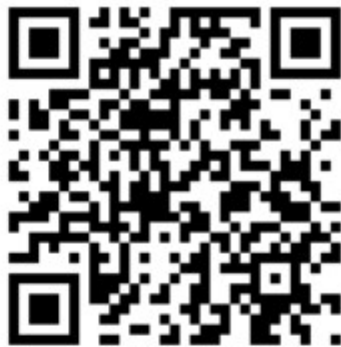

## 测试结果

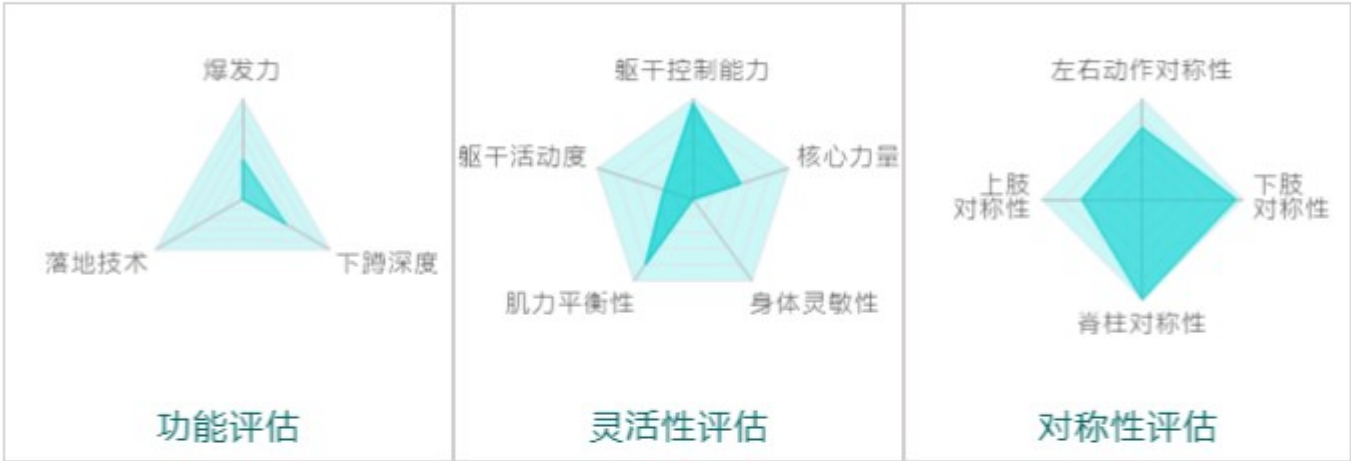

## 运动处方

| 动作名称            | 组数     | 次数          |
|-----------------|--------|-------------|
| 大腿外侧链拉伸_初级_1    | 每次2-3组 | 训练计划：每周1-2次 |
| 大腿后侧肌群拉伸训练_入门_1 | 每次3组   | 每周2次        |
| 腹部拉伸训练_进阶_2     | 每次2组   | 每周3次        |

Supplement: Supplementary file 294 [file 秦甜甜.pdf › ntelligent motion capture system/秦甜甜.pdf]

# 智能体能测评结果报告

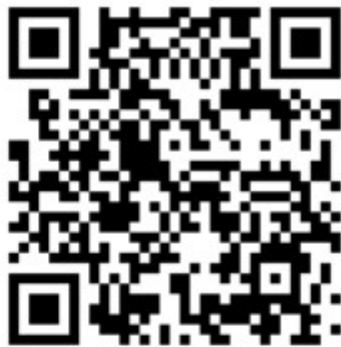

## 测试结果

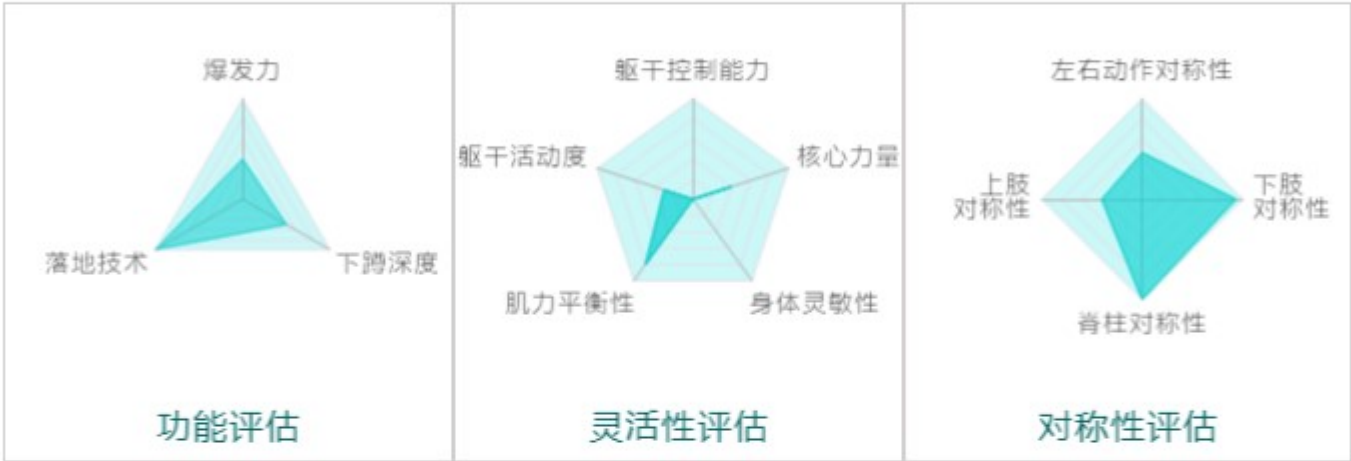

## 运动处方

| 动作名称            | 组数     | 次数   |
|-----------------|--------|------|
| 大腿后侧肌群拉伸训练_入门_1 | 每次3组   | 每周2次 |
| 大腿后侧肌群拉伸训练_初级_3 | 每次3-5组 | 每周3次 |
| 腹部拉伸训练_进阶_2     | 每次2组   | 每周3次 |

Supplement: Supplementary file 295 [file 程永慧.pdf › ntelligent motion capture system/程永慧.pdf]

# 智能体能测评结果报告

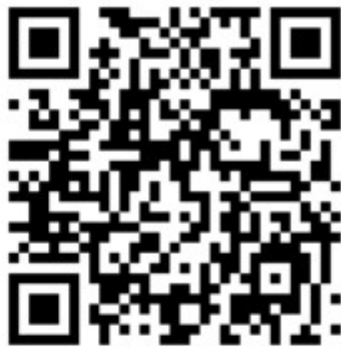

## 测试结果

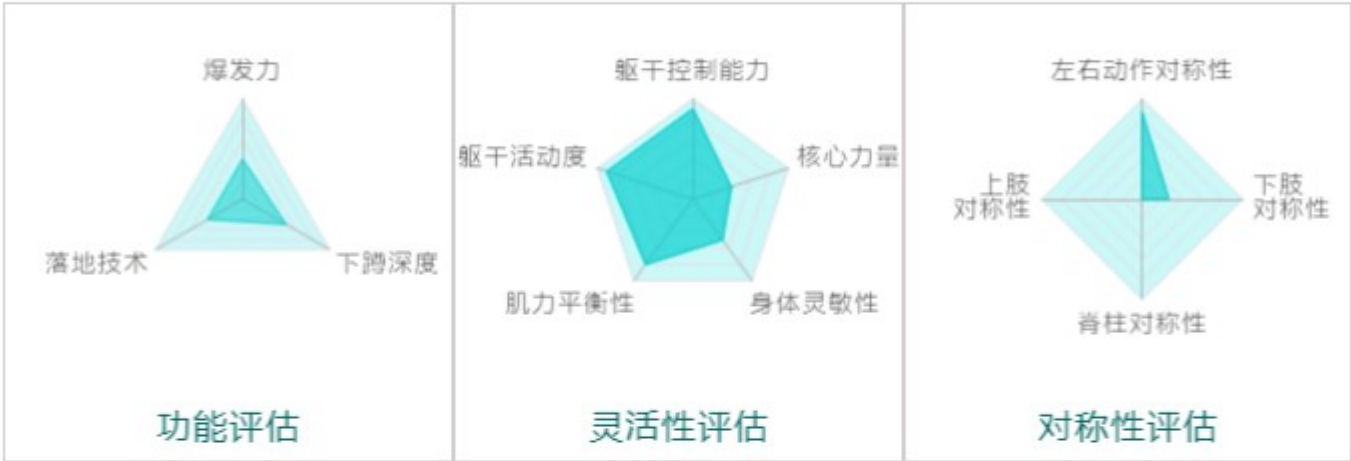

## 运动处方

| 动作名称            | 组数     | 次数          |
|-----------------|--------|-------------|
| 大腿外侧链拉伸_初级_1    | 每次2-3组 | 训练计划：每周1-2次 |
| 下肢前链拉伸训练_入门_2   | 每次3组   | 每周3次        |
| 大腿后侧肌群拉伸训练_入门_1 | 每次3组   | 每周2次        |

Supplement: Supplementary file 296 [file 罗桃红.pdf › ntelligent motion capture system/罗桃红.pdf]

# 智能体能测评结果报告

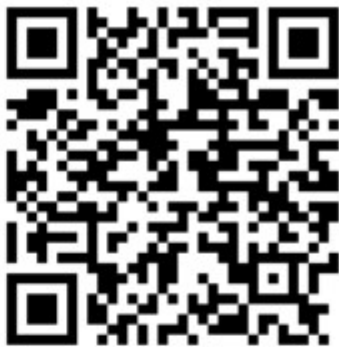

## 测试结果

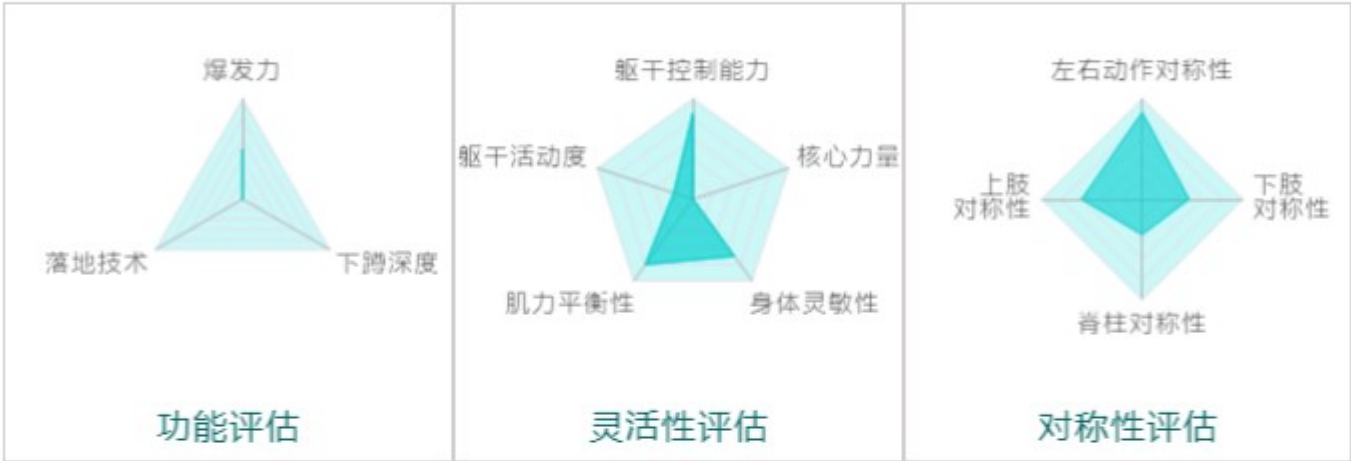

## 运动处方

| 动作名称          | 组数     | 次数   |
|---------------|--------|------|
| 臀部肌群拉伸训练_进阶_4 | 每次3-5组 | 每周3次 |
| 臀部肌群拉伸训练_初级_1 | 每次3组   | 每周3次 |
| 下肢前链拉伸训练_初级_1 | 每次3组   | 每周3次 |

Supplement: Supplementary file 297 [file 蒋天虹.pdf › ntelligent motion capture system/蒋天虹.pdf]

# 智能体能测评结果报告

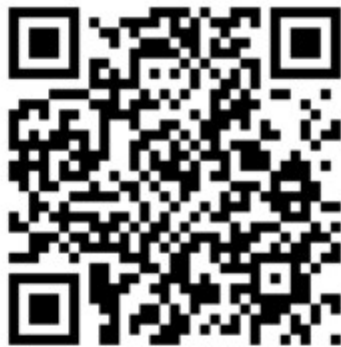

## 测试结果

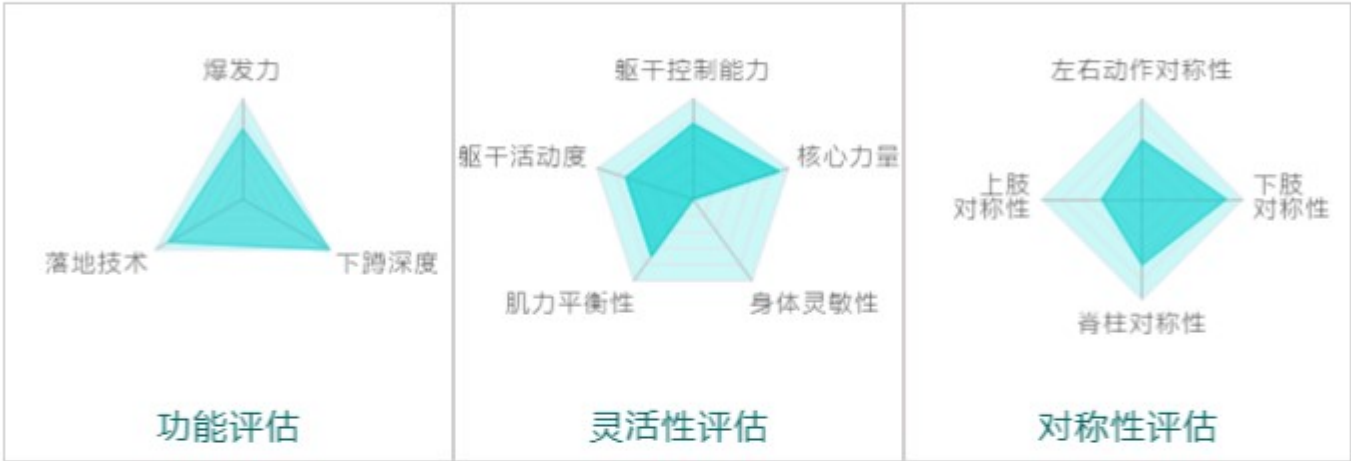

## 运动处方

| 动作名称            | 组数     | 次数   |
|-----------------|--------|------|
| 大腿后侧肌群拉伸训练_入门_1 | 每次3组   | 每周2次 |
| 臀部肌群拉伸训练_进阶_3   | 每次3-5组 | 每周3次 |
| 上臂屈侧拉伸_初级_1     | 每次3组   | 每周2次 |

Supplement: Supplementary file 298 [file 薛培爽.pdf › ntelligent motion capture system/薛培爽.pdf]

# 智能体能测评结果报告

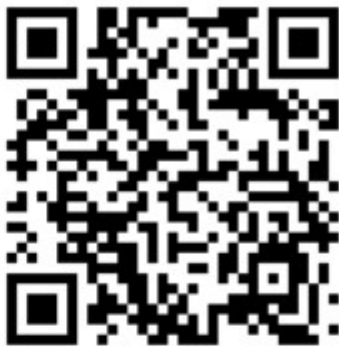

## 测试结果

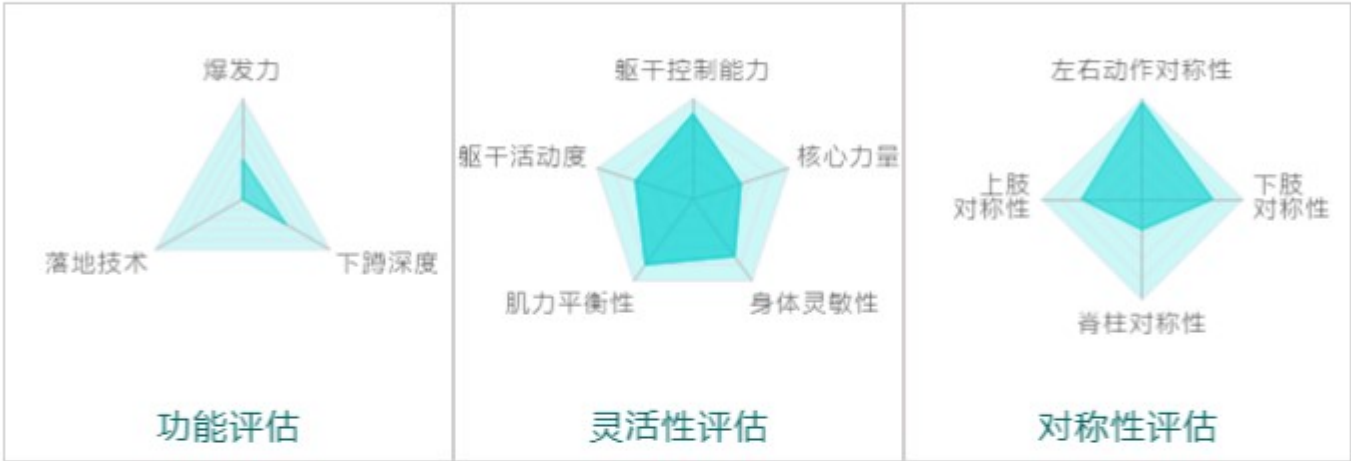

## 运动处方

| 动作名称          | 组数     | 次数          |
|---------------|--------|-------------|
| 大腿外侧链拉伸_初级_1  | 每次2-3组 | 训练计划：每周1-2次 |
| 臀部肌群拉伸训练_初级_2 | 每次3组   | 每周3次        |
| 臀部肌群拉伸训练_进阶_4 | 每次3-5组 | 每周3次        |

Supplement: Supplementary file 299 [file 袁欣羽.pdf › ntelligent motion capture system/袁欣羽.pdf]

# 智能体能测评结果报告

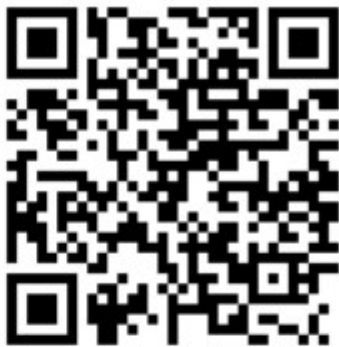

## 测试结果

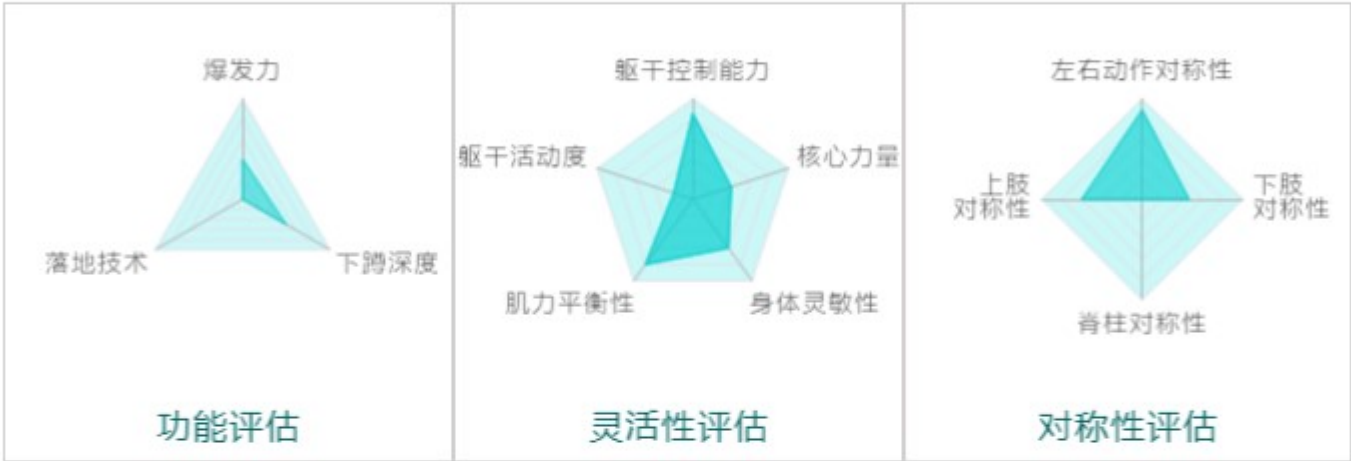

## 运动处方

| 动作名称            | 组数     | 次数          |
|-----------------|--------|-------------|
| 大腿外侧链拉伸_初级_1    | 每次2-3组 | 训练计划：每周1-2次 |
| 下肢前链拉伸训练_入门_2   | 每次3组   | 每周3次        |
| 大腿后侧肌群拉伸训练_入门_1 | 每次3组   | 每周2次        |

Supplement: Supplementary file 300 [file 赵亮.pdf › ntelligent motion capture system/赵亮.pdf]

# 智能体能测评结果报告

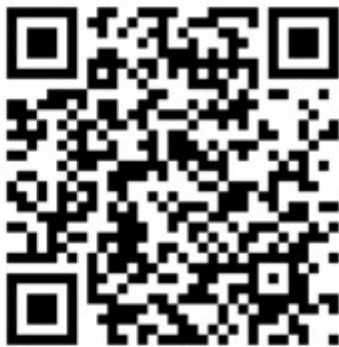

## 测试结果

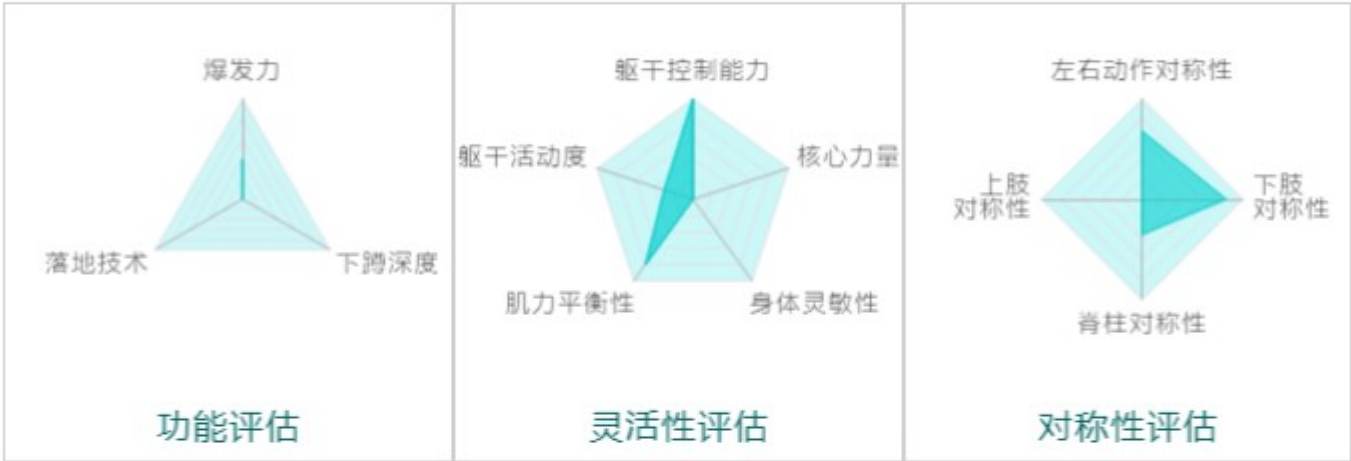

## 运动处方

| 动作名称          | 组数     | 次数   |
|---------------|--------|------|
| 臀部肌群拉伸训练_初级_2 | 每次3组   | 每周3次 |
| 臀部肌群拉伸训练_初级_1 | 每次3组   | 每周3次 |
| 下肢前链拉伸训练_进阶_1 | 每次3-5组 | 每周2次 |

Supplement: Supplementary file 301 [file 赵院林.pdf › ntelligent motion capture system/赵院林.pdf]

# 智能体能测评结果报告

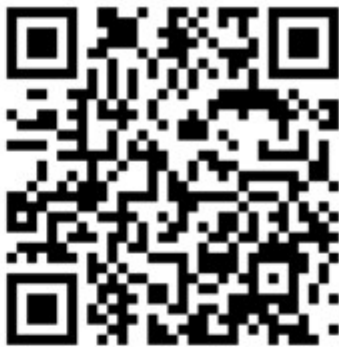

## 测试结果

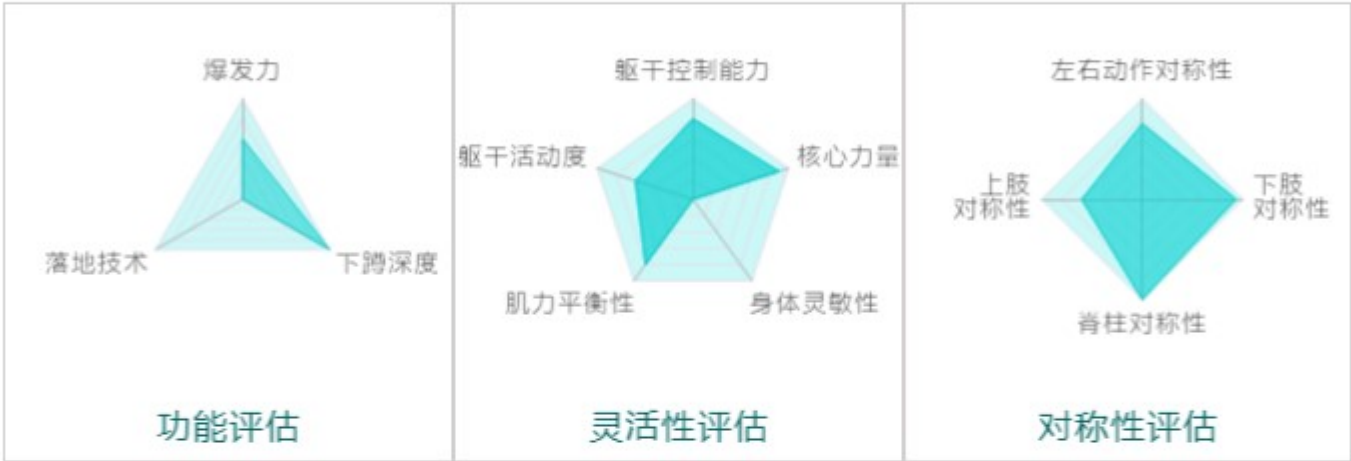

## 运动处方

| 动作名称          | 组数     | 次数   |
|---------------|--------|------|
| 臀部肌群拉伸训练_初级_2 | 每次3组   | 每周3次 |
| 臀部肌群拉伸训练_进阶_3 | 每次3-5组 | 每周3次 |
| 上臂屈侧拉伸_高级_1   | 每次2-3组 | 每周2次 |

Supplement: Supplementary file 302 [file 闫静雯.pdf › ntelligent motion capture system/闫静雯.pdf]

# 智能体能测评结果报告

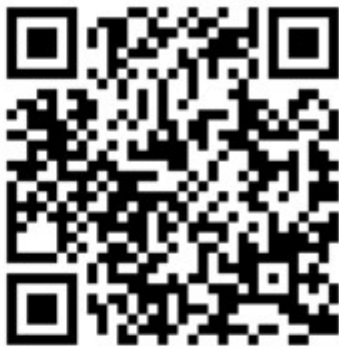

## 测试结果

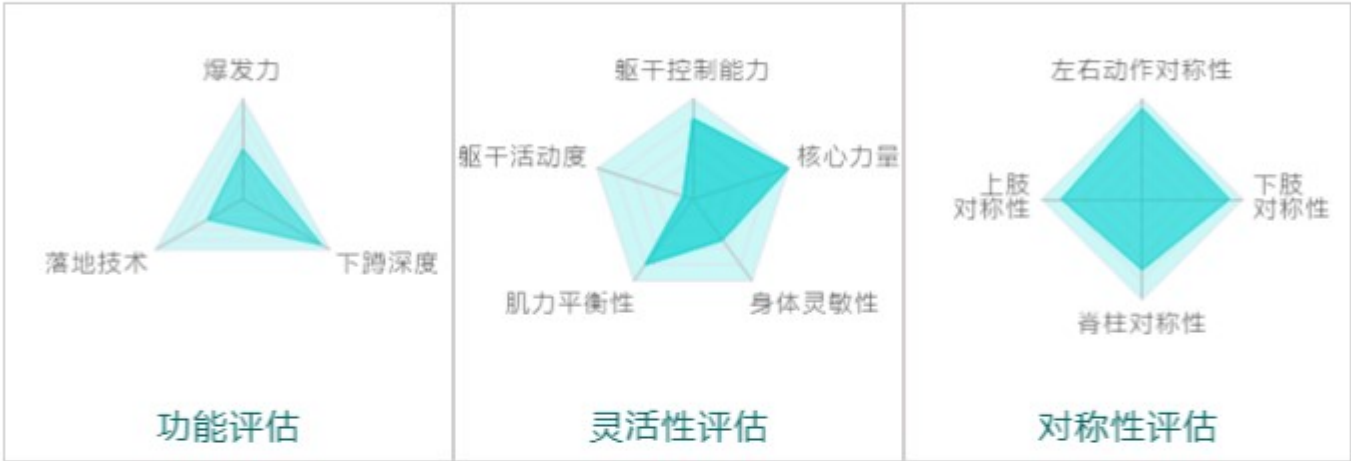

## 运动处方

| 动作名称            | 组数     | 次数          |
|-----------------|--------|-------------|
| 大腿外侧链拉伸_初级_1    | 每次2-3组 | 训练计划：每周1-2次 |
| 腹部拉伸训练_初级_1     | 每次3组   | 每周3次        |
| 大腿后侧肌群拉伸训练_入门_1 | 每次3组   | 每周2次        |

Supplement: Supplementary file 303 [file 陶奕霖.pdf › ntelligent motion capture system/陶奕霖.pdf]

# 智能体能测评结果报告

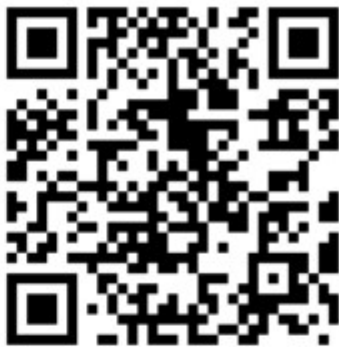

## 测试结果

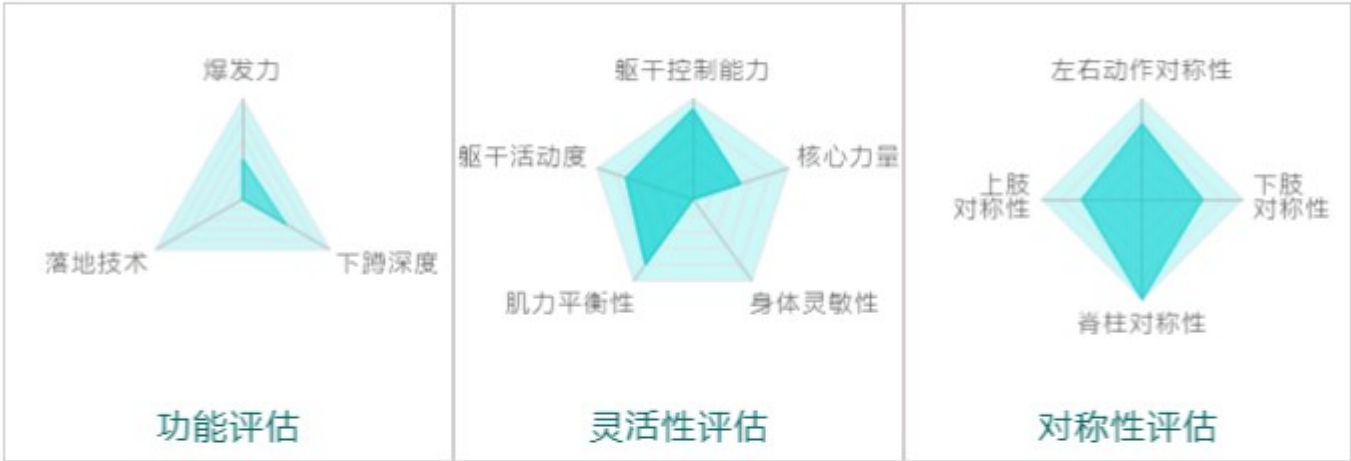

## 运动处方

| 动作名称          | 组数     | 次数          |
|---------------|--------|-------------|
| 大腿外侧链拉伸_初级_1  | 每次2-3组 | 训练计划：每周1-2次 |
| 臀部肌群拉伸训练_初级_2 | 每次3组   | 每周3次        |
| 小腿后群拉伸训练_初级_1 | 每次2-3组 | 每周3次        |

Supplement: Supplementary file 304 [file 韩雨平.pdf › ntelligent motion capture system/韩雨平.pdf]

# 智能体能测评结果报告

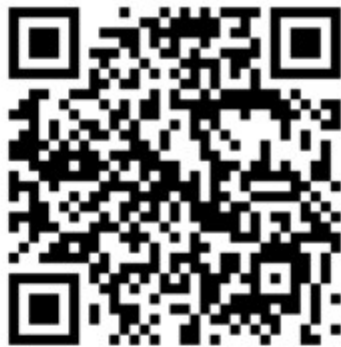

## 测试结果

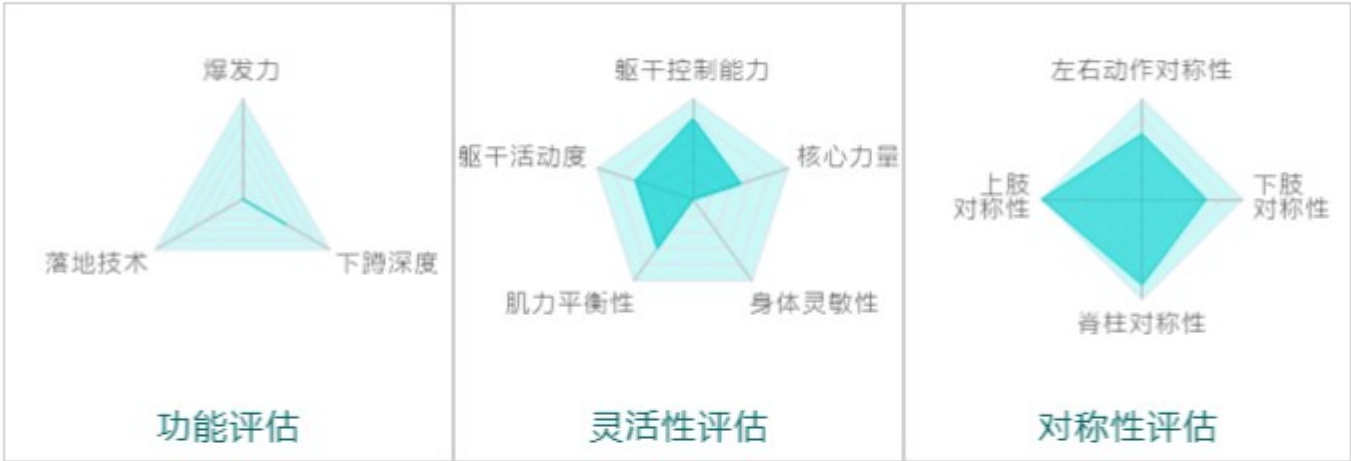

## 运动处方

| 动作名称            | 组数     | 次数          |
|-----------------|--------|-------------|
| 大腿外侧链拉伸_初级_1    | 每次2-3组 | 训练计划：每周1-2次 |
| 大腿后侧肌群拉伸训练_入门_1 | 每次3组   | 每周2次        |
| 臀部肌群拉伸训练_进阶_3   | 每次3-5组 | 每周3次        |

Supplement: Supplementary file 305 [file 马柯辉.pdf › ntelligent motion capture system/马柯辉.pdf]

# 智能体能测评结果报告

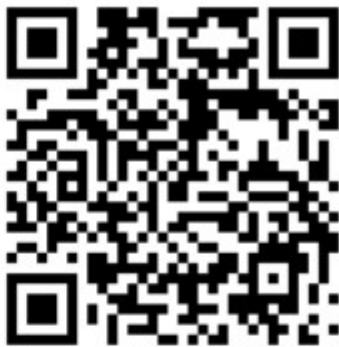

## 测试结果

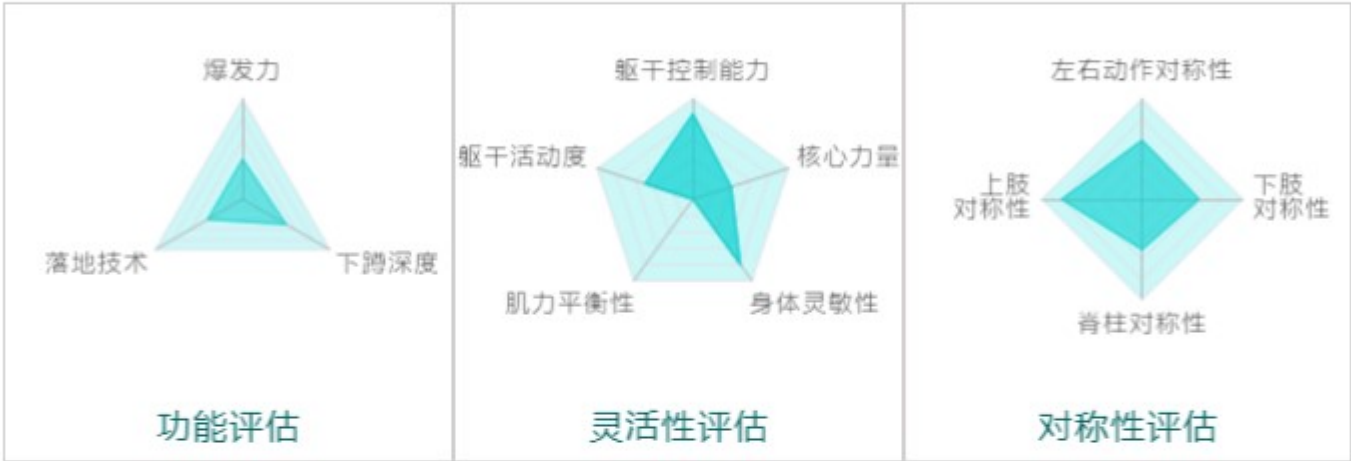

## 运动处方

| 动作名称          | 组数     | 次数          |
|---------------|--------|-------------|
| 臀部肌群拉伸训练_进阶_4 | 每次3-5组 | 每周3次        |
| 大腿外侧链拉伸_初级_1  | 每次2-3组 | 训练计划：每周1-2次 |
| 小腿后群拉伸训练_初级_1 | 每次2-3组 | 每周3次        |

Supplement: Supplementary file 306 [file 魏雨虹.pdf › ntelligent motion capture system/魏雨虹.pdf]

# 智能体能测评结果报告

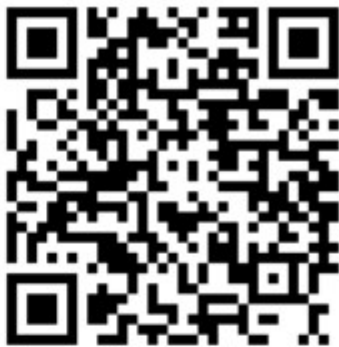

## 测试结果

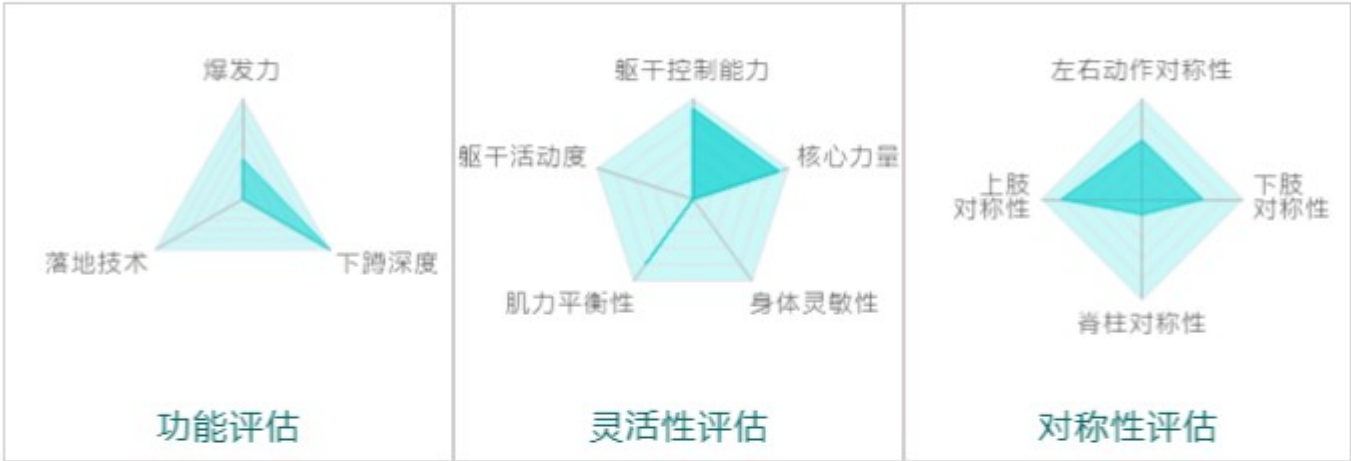

## 运动处方

| 动作名称            | 组数     | 次数   |
|-----------------|--------|------|
| 大腿后侧肌群拉伸训练_入门_1 | 每次3组   | 每周2次 |
| 下肢前链拉伸训练_初级_2   | 每次3-5组 | 每周3次 |
| 小腿后群拉伸训练_初级_1   | 每次2-3组 | 每周3次 |

Supplement: Supplementary file 307 [file 齐家树.pdf › ntelligent motion capture system/齐家树.pdf]

# 智能体能测评结果报告

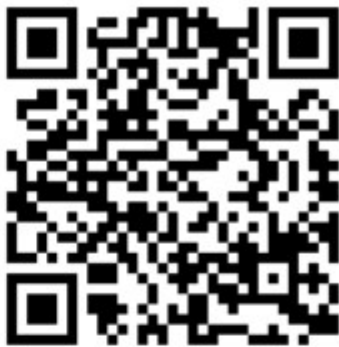

## 测试结果

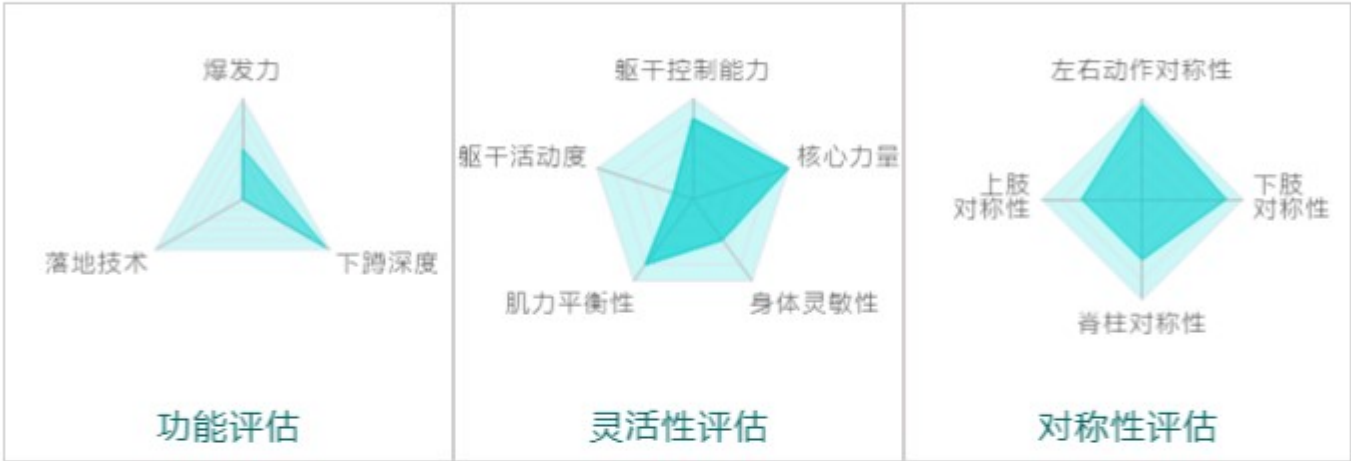

## 运动处方

| 动作名称          | 组数     | 次数          |
|---------------|--------|-------------|
| 大腿外侧链拉伸_初级_1  | 每次2-3组 | 训练计划：每周1-2次 |
| 臀部肌群拉伸训练_初级_2 | 每次3组   | 每周3次        |
| 臀部肌群拉伸训练_进阶_3 | 每次3-5组 | 每周3次        |

Supplement: Supplementary file 308 [file 龚泳霖.pdf › ntelligent motion capture system/龚泳霖.pdf]
